# Supplementary material for: Catalytic enantioselective synthesis of perfluoroalkyl-substituted β-lactones via a concerted asynchronous [2 + 2] cycloaddition: a synthetic and computational study
Source: PubMed Central journal article supplement (PMC6585878; doi:10.1039/c9sc00390h), 2019-04-29
Supplement: SC-010-C9SC00390H-s001.pdf [file SC-010-C9SC00390H-s001.pdf]

# Catalytic enantioselective synthesis of perfluoroalkyl-substituted $\beta$ -lactones *via* a concerted asynchronous [2+2] cycloaddition: A synthetic and computational study

Diego-Javier Barrios Antúnez,<sup>a</sup> Mark D. Greenhalgh,<sup>a</sup> Alexander C. Brueckner,<sup>b</sup> Daniel M. Walden,<sup>b</sup> Pilar Elías-Rodríguez,<sup>a</sup> Patrick Roberts,<sup>a</sup> Benjamin G. Young,<sup>c</sup> Thomas H. West,<sup>a</sup> Alexandra M. Z. Slawin,<sup>a</sup> Paul Ha-Yeon Cheong\*<sup>b</sup> and Andrew D. Smith\*<sup>a</sup>

<sup>a</sup> EaStCHEM, School of Chemistry, University of St Andrews, North Haugh, St Andrews, KY16 9ST, U.K.

<sup>b</sup> Department of Chemistry, Oregon State University, 153 Gilbert Hall, Corvallis, Oregon 97333, USA.

<sup>c</sup> Department of Chemistry, Physics, and Engineering, Biola University, 315 Lim Center, La Mirada, California 90639, USA.

\* E-mails: ads10@st-andrews.ac.uk; cheongh@oregonstate.edu

## Experimental Supporting Information

### Table of Contents

|                                                                 |      |
|-----------------------------------------------------------------|------|
| General Experimental                                            | S2   |
| General Procedures                                              | S4   |
| Synthesis of Homoanhydrides                                     | S6   |
| Synthesis of Perfluorinated Ketones                             | S9   |
| Synthesis of $\beta$ -lactones                                  | S13  |
| Product Derivatisations                                         | S37  |
| Epimerisation Studies                                           | S46  |
| Thermal Stability of $\beta$ -Lactones <b>21–23</b>             | S51  |
| Determination of <sup>13</sup> C KIEs at Natural Abundance      | S52  |
| X-Ray Crystallographic Details                                  | S56  |
| Computational Details and Discussion                            | S57  |
| Computed Geometries and Energies                                | S65  |
| Concerted [2+2] Mechanism Coordinate Diagram: PBE               | S65  |
| Stepwise Mechanism Coordinate Diagram: M06-2X                   | S77  |
| Concerted [2+2] Mechanism Additional Structures: PBE            | S92  |
| Stepwise Mechanism Additional Structures: M06-2X                | S107 |
| Alternative Mechanisms: PBE                                     | S127 |
| NMR Spectra ( <sup>1</sup> H, <sup>13</sup> C, <sup>19</sup> F) | S135 |
| HPLC Spectra                                                    | S221 |
| References                                                      | S273 |

## General Experimental

Reactions involving moisture sensitive reagents were carried out in flame-dried glassware under a nitrogen atmosphere using standard vacuum line techniques, and using anhydrous solvents. Anhydrous solvents (Et<sub>2</sub>O, CH<sub>2</sub>Cl<sub>2</sub> and toluene) were obtained from an anhydrous solvent system (purified using an alumina column, Mbraun SPS-800). All other reactions were performed in standard glassware with no precautions to exclude air or moisture. Solvents and commercial reagents were used as supplied without further purification unless otherwise stated.

Room temperature (r.t.) refers to 20-25 °C. Temperatures of 0 °C and -78 °C were obtained using ice/water and CO<sub>2</sub>(s)/acetone baths respectively. -90 °C was obtained using an immersion cooler (HAAKE EK 90). Reactions involving heating were performed using a DrySyn block and a contact thermocouple.

*In vacuo* refers to the use either a Büchi Rotavapor R-200 with a Büchi V-491 heating bath and Büchi V-800 vacuum controller; a Büchi Rotavapor R-210 with a Büchi V-491 heating bath and Büchi V-850 vacuum controller; a Heidolph Laborota 4001 with vacuum controller; an IKA RV10 rotary evaporator with an IKA HB10 heating bath and ILMVAC vacuum controller; or an IKA RV10 rotary evaporator with an IKA HB10 heating bath and Vacubrand CVC3000 vacuum controller. Rotary evaporator condensers are fitted to Julabo FL601 Recirculating Coolers filled with ethylene glycol set to -5 °C.

Analytical thin layer chromatography was performed on pre-coated aluminium plates (Kieselgel 60 F<sub>254</sub> silica). TLC visualisation was carried out with ultraviolet light (254 nm), followed by staining with a 1% aqueous KMnO<sub>4</sub> solution. Flash column chromatography was performed on Kieselgel 60 silica in the solvent system stated. Automated chromatography was performed on a Biotage Isolera Four running Biotage OS578 with a UV/Vis detector using the method stated and cartridges filled with Kieselgel 60 silica.

Melting points were recorded on an Electrothermal 9100 melting point apparatus and are uncorrected.

Optical rotations were measured on a Perkin Elmer Precisly/Model-341 polarimeter operating at the sodium D line with a 100 mm path cell at 20 °C.

HPLC analyses were obtained using either a Shimadzu HPLC consisting of a DGU-20A5 degassing unit, LC-20AT liquid chromatography pump, SIL-20AHT autosampler, CMB-20A communications bus module, SPD-M20A diode array detector and a CTO-20A column oven; or a Shimadzu HPLC consisting of a DGU-20A5R degassing unit, LC-20AD liquid chromatography pump, SIL-20AHT autosampler, SPD-20A UV/Vis detector and a CTO-20A column oven. Separation was achieved using DAICEL CHIRALCEL OD-H columns or DAICEL CHIRALPAK AD-H, AS-H and IC columns using the method stated. HPLC traces of enantiomerically enriched compounds were compared with authentic racemic spectra.

$^1\text{H}$ ,  $^{13}\text{C}\{^1\text{H}\}$  and  $^{19}\text{F}\{^1\text{H}\}$  nuclear magnetic resonance (NMR) spectra were acquired on either a Bruker Avance II 400 ( $^1\text{H}$  400 MHz;  $^{13}\text{C}\{^1\text{H}\}$  101 MHz,  $^{19}\text{F}\{^1\text{H}\}$  376 MHz) or a Bruker Avance II 500 ( $^1\text{H}$  500 MHz;  $^{13}\text{C}\{^1\text{H}\}$  126 MHz,  $^{19}\text{F}\{^1\text{H}\}$  471 MHz) spectrometer at ambient temperature in the deuterated solvent stated. All chemical shifts are quoted in parts per million (ppm) and referenced to the residual solvent peak. All coupling constants,  $J$ , are quoted in Hz. Multiplicities are indicated by: s (singlet), d (doublet), t (triplet), q (quartet), dd (doublet of doublets), dt (doublet of triplets), dq (doublet of quartets), tt (triplet of triplets), ddd (doublet of doublet of doublets) and m (multiplet). The abbreviation Ar is used to denote aromatic, Ph to denote phenyl, br to denote broad and app to denote apparent. NMR peak assignments were confirmed using 2D  $^1\text{H}$ - $^{13}\text{C}$  heteronuclear single quantum coherence (HSQC) and 2D  $^1\text{H}$ - $^{13}\text{C}$  heteronuclear multiple-bond correlation spectroscopy (HMBC) where necessary.

Infrared spectra were recorded on a Shimadzu IRAffinity-1 Fourier transform IR spectrophotometer fitted with a Specac Quest ATR accessory (diamond puck). Spectra were recorded of either thin films or solids, with characteristic absorption wavenumbers ( $\nu_{\text{max}}$ ) reported in  $\text{cm}^{-1}$ .

Mass spectrometry ( $m/z$ ) data were acquired by electrospray ionization (ESI), atmospheric pressure chemical ionization (APCI) or nanospray ionization (NSI) either at the University of St Andrews or the EPSRC National Mass Spectrometry Facility, Swansea.

## General Procedures

### General Procedure A

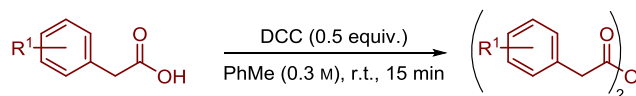

*N,N'*-Dicyclohexylcarbodiimide (DCC) (0.5 equiv.) was added to a solution of the appropriate carboxylic acid (1 equiv.) in toluene (0.3 M) at r.t., and the reaction mixture was allowed to stir for 15 min. The suspension was filtered through Celite®, which was washed with extra toluene, and the filtrate was concentrated *in vacuo* to give the crude product, which was either used without further purification, or recrystallised from hot Et<sub>2</sub>O.

### General Procedure B

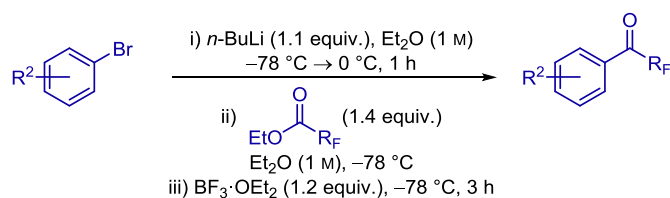

Following a literature procedure,<sup>1</sup> *n*-butyl lithium (2.5 M in hexane, 1.1 equiv.) was added dropwise to a solution of the suitable bromoarene (1 equiv.) in anhydrous Et<sub>2</sub>O (1 M) at –78 °C under an inert atmosphere. The reaction mixture was then allowed to warm to 0 °C and allowed to stir for 1 h. This solution was then transferred by cannula into a flask containing the suitable polyfluoroester (1.4 equiv.) in Et<sub>2</sub>O (1 M) at –78 °C under an inert atmosphere. BF<sub>3</sub>·OEt<sub>2</sub> (1.2 equiv.) was then added and the mixture was allowed to stir at –78 °C for 3 h. Saturated aqueous NH<sub>4</sub>Cl was added and the biphasic mixture was allowed to warm to r.t. The layers were separated, the aqueous layer was extracted with Et<sub>2</sub>O, and the combined organic layers were washed with brine, dried (MgSO<sub>4</sub>) and concentrated *in vacuo*. The residue was purified as described to afford the desired ketone.

### General Procedure C

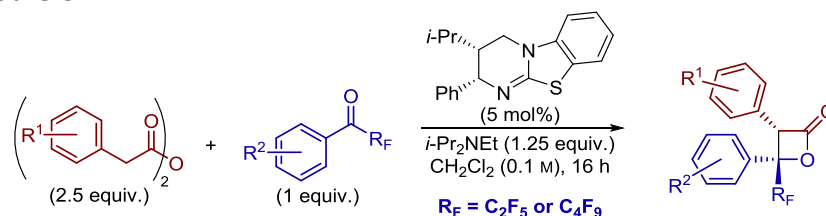

(2*S*,3*R*)-HyperBTM (5 mol%) and *i*-Pr<sub>2</sub>NEt (1.25 equiv.) were added to a solution of the appropriate ketone (1 equiv.) and anhydride (2.5 equiv.) in CH<sub>2</sub>Cl<sub>2</sub> (0.1 M) at r.t., and the mixture was allowed to stir for 16 h. The reaction mixture was diluted with CH<sub>2</sub>Cl<sub>2</sub>, 0.1 M HCl was added, and the layers separated. The aqueous layer was extracted with CH<sub>2</sub>Cl<sub>2</sub> and the combined organic layers were washed sequentially with 0.1 M HCl and brine, dried (MgSO<sub>4</sub>) and concentrated *in vacuo* to afford



the crude compound, which was purified by Biotage column chromatography in the stated solvent system.

#### General Procedure D

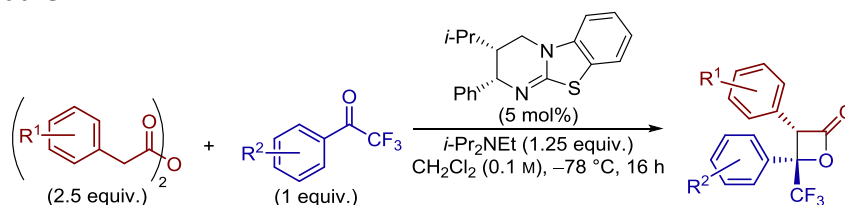

(2*S*,3*R*)-HyperBTM (5 mol%) and  $i\text{-Pr}_2\text{NEt}$  (1.25 equiv.) were added to a solution of the appropriate ketone (1 equiv.) and anhydride (2.5 equiv.) in  $\text{CH}_2\text{Cl}_2$  (0.1 M) at  $-78\text{ }^\circ\text{C}$  under an inert atmosphere, and the mixture was allowed to stir for 16 h. The reaction mixture was diluted with  $\text{CH}_2\text{Cl}_2$ , 0.1 M HCl was added, and the layers separated. The aqueous layer was extracted with  $\text{CH}_2\text{Cl}_2$  and the combined organic layers were washed sequentially with 0.1 M HCl and brine, dried ( $\text{MgSO}_4$ ) and concentrated *in vacuo* to afford the crude compound, which was purified by Biotage column chromatography in the stated solvent system.

#### General Procedure E

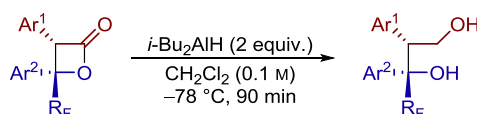

1 M  $i\text{-Bu}_2\text{AlH}$  (DIBAL) solution in hexane (2 equiv.) was added dropwise to a solution of a lactone (1 equiv.) in  $\text{CH}_2\text{Cl}_2$  (0.1 M) at  $-78\text{ }^\circ\text{C}$  under an inert atmosphere, and the reaction allowed to stir for 90 min. Aqueous  $\text{NH}_4\text{Cl}$  was added and the mixture was allowed to warm to r.t. The aqueous layer was extracted with  $\text{CH}_2\text{Cl}_2$  ( $2 \times 10\text{ mL}$ ) and the combined organic layers dried ( $\text{MgSO}_4$ ), filtered and concentrated *in vacuo* to give a residue, which was purified by column chromatography.

#### General Procedure F

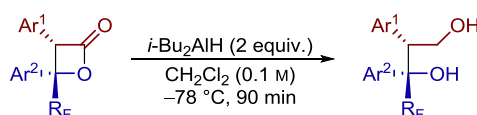

$\text{NaH}$  60% in mineral oil (2 equiv.) was added to a solution of a diol (1 equiv.) in THF (0.02 M) under an inert atmosphere and the mixture was stirred at r.t. for 10 min. 2,4,6-Triisopropylbenzenesulfonyl chloride (0.9 equiv.) was added and the mixture stirred for 16h. Aqueous  $\text{NH}_4\text{Cl}$  was added and the aqueous phase extracted with EtOAc ( $2 \times 10\text{ mL}$ ). The combined organic layers were dried ( $\text{MgSO}_4$ ), filtered and concentrated *in vacuo* to give a residue, which was purified by column chromatography.

## Synthesis of Homoanhydrides

### 2-Phenylacetic anhydride **17**

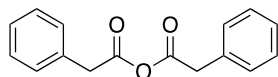

Following General Procedure A, phenylacetic acid (0.45 g, 3.33 mmol) and DCC (0.35 g, 1.70 mmol) in toluene (10 mL) gave 2-phenylacetic anhydride **17** as a colourless solid (0.43 g, quant.).

**m.p.** 68–70 °C {lit.<sup>1</sup> 72–72.5 °C}; **<sup>1</sup>H NMR** (400 MHz, CDCl<sub>3</sub>) δ<sub>H</sub>: 3.76 (4H, s, 2 × CH<sub>2</sub>), 7.23–7.25 (4H, m, ArH), 7.32–7.38 (6H, m, ArH). All data in accordance with the literature.<sup>1</sup>

### 2-(4-(Dimethylamino)phenyl)acetic anhydride **S1**

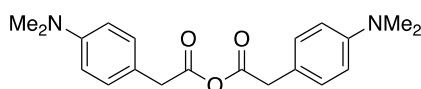

Following General Procedure A, 4-(dimethylamino)phenylacetic acid (1.5 g, 8.37 mmol) and DCC (864 g, 4.19 mmol) in toluene (28 mL) gave 2-(4-(dimethylamino)phenyl)acetic anhydride **S1** as a brown solid (1.47 g, quant.).

**m.p.** 80–82 °C; **<sup>1</sup>H NMR** (500 MHz, CDCl<sub>3</sub>) δ<sub>H</sub>: 2.97 (12H, s, 4 × CH<sub>3</sub>), 3.65 (4H, s, 2 × CH<sub>2</sub>), 6.69–6.73 (4H, m, ArC(3,5)H), 7.09–7.13 (4H, m, ArC(2,6)H); **<sup>13</sup>C{<sup>1</sup>H} NMR** (126 MHz, CDCl<sub>3</sub>) δ<sub>C</sub>: 40.7 (CH<sub>3</sub>), 41.2 (CH<sub>2</sub>), 112.9 (ArC(3,5)H), 119.8 (ArC(1)), 130.2 (ArC(2,6)H), 150.0 (ArC(4)), 168.0 (C=O); **IR** (neat) ν<sub>max</sub> cm<sup>-1</sup> 2887, 1803 (C=O), 1694, 1522, 1044, 802; **HRMS** (APCI<sup>+</sup>) C<sub>20</sub>H<sub>25</sub>O<sub>3</sub>N<sub>2</sub> ([M+H]<sup>+</sup>), found 341.1854, requires 341.1860 (–1.6 ppm).

### 2-(4-Methoxyphenyl)acetic anhydride **S2**

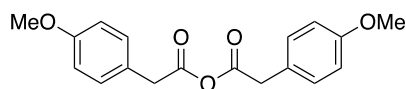

Following General Procedure A, 4-methoxyphenylacetic acid (2.5 g, 15 mmol) and DCC (1.55 g, 7.52 mmol) in toluene (50 mL) gave 2-(4-methoxyphenyl)acetic anhydride **S2** as a colourless solid (2.43 g, quant.).

**m.p.** 58–60 °C; {lit.<sup>1</sup> 60–62 °C}; **<sup>1</sup>H NMR** (500 MHz, CDCl<sub>3</sub>) δ<sub>H</sub>: 3.68 (4H, s, 2 × CH<sub>2</sub>), 3.83 (6H, s, 2 × OCH<sub>3</sub>), 6.85–6.89 (4H, m, ArH), 7.12–7.16 (4H, m, ArH). All data in accordance with the literature.<sup>1</sup>

### 2-(4-Fluorophenyl)acetic anhydride **S3**

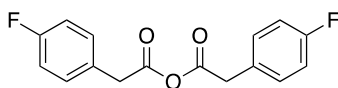

Following General Procedure A, 4-fluorophenylacetic acid (1.5 g, 9.73 mmol) and DCC (1 g, 4.86 mmol) in toluene (32 mL) gave 2-(4-fluorophenyl)acetic anhydride **S3** as a colourless solid (1.45 g, quant.).

**m.p.** 32–34 °C; {lit.<sup>1</sup> 36–38 °C}; <sup>1</sup>H NMR (300 MHz, CDCl<sub>3</sub>) δ<sub>H</sub>: 3.69 (4H, s, 2 × CH<sub>2</sub>), 6.90–7.05 (4H, m, ArH), 7.08–7.22 (4H, m, ArH). All data in accordance with the literature.<sup>1</sup>

### 2-(4-Bromophenyl)acetic anhydride **S4**

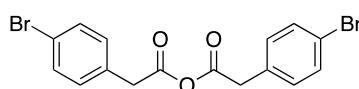

Following General Procedure A, 4-bromophenylacetic acid (1.5 g, 6.98 mmol) and DCC (720 mg, 3.49 mmol) in toluene (24 mL) gave 2-(4-bromophenyl)acetic anhydride **S4** as a colourless solid (1.47 g, quant.).

**m.p.** 75–77 °C; {lit.<sup>1</sup> 76–78 °C}; <sup>1</sup>H NMR (500 MHz, CDCl<sub>3</sub>) δ<sub>H</sub>: 3.68 (4H, s, 2 × CH<sub>2</sub>), 7.05–7.09 (4H, m, ArH), 7.43–7.47 (4H, m, ArH). All data in accordance with the literature.<sup>1</sup>

### 2-(4-(Trifluoromethylphenyl)acetic anhydride **S5**

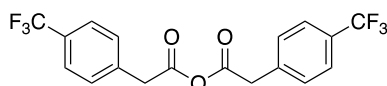

Following General Procedure A, 4-(trifluoromethyl)phenylacetic acid (2.0 g, 9.80 mmol) and DCC (1 g, 4.90 mmol) in toluene (31 mL) gave 2-(4-(trifluoromethylphenyl)acetic anhydride **S5** as a yellow solid (2.05 g, quant.)

**m.p.** 55–57 °C; {lit.<sup>1</sup> 58–60 °C}; <sup>1</sup>H NMR (300 MHz, CDCl<sub>3</sub>) δ<sub>H</sub>: 3.80 (4H, s, 2 × CH<sub>2</sub>), 7.33 (4H, m, ArH), 7.59 (4H, m, ArH). All data in accordance with the literature.<sup>1</sup>

### 2-(*m*-Tolyl)acetic anhydride **S6**

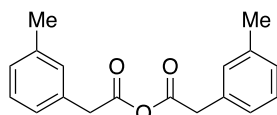

Following General Procedure A, *m*-tolylacetic acid (1.00 g, 6.7 mmol) and DCC (0.75 g, 3.7 mmol) in toluene (20 mL) gave 2-(*m*-tolyl)acetic anhydride **S6** (0.86 g, 46%) as a yellow oil.

<sup>1</sup>H NMR (400 MHz, CDCl<sub>3</sub>) δ<sub>H</sub>: 2.37 (6H, s, 2 × ArCH<sub>3</sub>), 3.71 (4H, s, 2 × CH<sub>2</sub>), 7.01–7.10 (4H, m, ArH), 7.11–7.17 (2H, m, ArH), 7.20–7.30 (2H, m, ArH). All data in accordance with the literature.<sup>2</sup>

### 2-(*o*-Tolyl)acetic anhydride **S7**

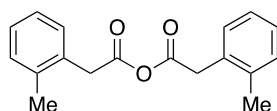

Following General Procedure A, *o*-tolylacetic acid (2.00 g, 13.4 mmol) and DCC (1.50 g, 7.4 mmol, 0.55 equiv.) in toluene (30 mL) gave 2-(*o*-tolyl)acetic anhydride **S7** (1.27 g, 34%) as a yellow oil.

$^1\text{H NMR}$  (400 MHz,  $\text{CDCl}_3$ )  $\delta_{\text{H}}$ : 2.26 (6H, m,  $2 \times \text{ArCH}_3$ ), 3.74 (4H, m,  $2 \times \text{CH}_2$ ), 7.12–7.24 (8H, m, ArH). All data in accordance with the literature.<sup>3</sup>

### 2-(Thiophen-3-yl)acetic anhydride **S8**

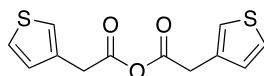

Following General Procedure A, 3-thiopheneacetic acid (2.5 g, 17.58 mmol) and DCC (1.8 g, 8.79 mmol) in toluene (59 mL) gave 2-(thiophen-3-yl)acetic anhydride **S8** as a yellow solid (2.43 g, quant.). **m.p.** 38–40 °C; {lit.<sup>1</sup> 40–42 °C};  $^1\text{H NMR}$  (500 MHz,  $\text{CDCl}_3$ )  $\delta_{\text{H}}$ : 3.79 (4H, s,  $2 \times \text{CH}_2$ ), 6.99 (2H, dd,  $J$  5.0, 1.3, ArH), 7.15 (2H, dd,  $J$  2.1, 1.1, ArH), 7.31 (2H, dd,  $J$  5.0, 3.0, ArH). All data in accordance with the literature.<sup>1</sup>

### 2-(1-Methyl-1*H*-indol-3-yl)acetic anhydride **S9**

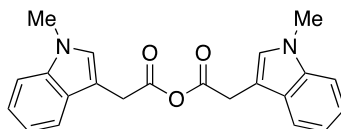

Following General Procedure A, 1-methyl-1*H*-indol-3-ylacetic acid (1.00 g, 5.3 mmol) and DCC (0.60 g, 2.9 mmol) in toluene (30 mL) gave 2-(1-methyl-1*H*-indol-3-yl)acetic anhydride **S9** as a yellow oil (1.18 g, 62%).

$^1\text{H NMR}$  (500 MHz,  $\text{CDCl}_3$ )  $\delta_{\text{H}}$ : 3.73 (6H, s,  $2 \times \text{CH}_3$ ), 3.91 (4H, m,  $2 \times \text{CH}_2$ ), 6.96 (2H, s, ArC(2)H), 7.15–7.20 (2H, m, ArH), 7.21–7.25 (2H, m, ArCH), 7.32–7.36 (2H, m, ArC(6)H), 7.56 (2H, dd,  $J$  7.8, 1.1, ArC(4)H). All data in accordance with the literature.<sup>1</sup>

### (*E*)-Pent-3-enoic anhydride **S10**

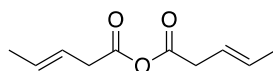

Following General Procedure A, (*E*)-3-pentenoic acid (2.5 g, 25 mmol) and DCC (2.6 g, 12.5 mmol) in toluene (83 mL) gave (*E*)-pent-3-enoic anhydride **S10** as a pale yellow oil (1.40 g, 61%).

$^1\text{H NMR}$  (300 MHz,  $\text{CDCl}_3$ )  $\delta_{\text{H}}$ : 1.69–1.73 (6H, m,  $2 \times \text{CH}_3$ ), 3.11–3.20 (4H, m,  $2 \times \text{CH}_2$ ), 5.44–5.57 (2H, m,  $2 \times \text{CH}$ ), 5.57–5.71 (2H, m,  $2 \times \text{CH}$ ). All data in accordance with the literature.<sup>1</sup>

## 2-(Phenylthio)acetic anhydride **S11**

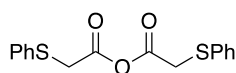

Following General Procedure A, 2-(phenylthio)acetic acid (1.11 g, 6.6 mmol) and DCC (0.70 g, 3.4 mmol) in toluene (20 mL) gave 2-(phenylthio)acetic anhydride **S11** (1.18 g, 62%) as a yellow oil.

$^1\text{H NMR}$  (500 MHz,  $\text{CDCl}_3$ )  $\delta_{\text{H}}$ : 3.67 (4H, s,  $2 \times \text{CH}_2$ ), 7.26–7.37 (6H, m, PhH), 7.43–7.50 (4H, m, PhH).

Used without further purification.

## Synthesis of Perfluorinated Ketones

### 1-(4-Bromophenyl)-2,2,3,3,4,4,5,5,5-nonafluoropentan-1-one **18**

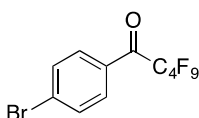

Following General Procedure B, 1,4-dibromobenzene (5 g, 21.2 mmol), *n*-BuLi (2.5 M in hexanes, 9.3 mL, 23.3 mmol), ethyl perfluoropentanoate (8.7 g, 29.7 mmol) and  $\text{BF}_3 \cdot \text{OEt}_2$  (3.2 mL, 25.4 mmol) gave, after column chromatography (eluent  $\text{Et}_2\text{O}:\text{hexane}$ , 0%  $\rightarrow$  0.2%), 1-(4-bromophenyl)-2,2,3,3,4,4,5,5,5-nonafluoropentan-1-one **18** as a colourless oil (5.98 g, 70%).

$^1\text{H NMR}$  (300 MHz,  $\text{CDCl}_3$ )  $\delta_{\text{H}}$ : 7.66–7.73 (2H, m, ArC(3,5)H), 7.89–7.97 (2H, m, ArC(2,6)H);  $^{19}\text{F NMR}$  (376 MHz,  $\text{CDCl}_3$ )  $\delta_{\text{F}}$ : -125.3 – -125.1 (m,  $\text{CF}_2$ ), -122.0 – -121.8 (m,  $\text{CF}_2$ ), -113.2 – -113.0 (m,  $\text{CF}_2$ ), -80.9 (tt,  $J$  9.8, 2.6,  $\text{CF}_3$ ). All data in accordance with the literature.<sup>4</sup>

### 1-(4-Bromophenyl)-2,2,3,3,3-pentafluoropropan-1-one **19**

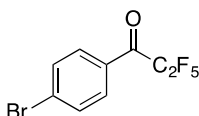

Following General Procedure B, 1,4-dibromobenzene (4.72 g, 20 mmol), *n*-BuLi (2.5 M in hexanes, 8.8 mL, 22 mmol), ethyl pentafluoropropionate (4.14 mL, 28 mmol) and  $\text{BF}_3 \cdot \text{OEt}_2$  (3 mL, 24 mmol) gave, after distillation, 1-(4-bromophenyl)-2,2,3,3,3-pentafluoropropan-1-one **19** as a light yellow oil (3.04 g, 50%).

**b.p.** 45–46 °C, 1 mbar; {lit<sup>4</sup> 170 °C, 70 mbar};  $^1\text{H NMR}$  (500 MHz,  $\text{CDCl}_3$ )  $\delta_{\text{H}}$ : 7.70–7.75 (1H, m, ArC(3,5)H), 7.93–7.98 (1H, m, ArC(2,6)H);  $^{19}\text{F NMR}$  (471 MHz,  $\text{CDCl}_3$ )  $\delta_{\text{F}}$ : -115.8 ( $\text{CF}_2$ ), -81.7 ( $\text{CF}_3$ ). All data in accordance with the literature.<sup>4</sup>

### 2,2,3,3,4,4,5,5,5-Nonafluoro-1-(3-fluorophenyl)pentan-1-one **S12**

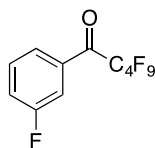

Following General Procedure B, 3-bromofluorobenzene (2.2 mL, 20 mmol), *n*-BuLi (2.5 M in hexanes, 8.8 mL, 22 mmol), ethyl perfluoropentanoate (8.18 g, 28 mmol) and BF<sub>3</sub>·OEt<sub>2</sub> (3 mL, 24 mmol) gave, after distillation, 2,2,3,3,4,4,5,5,5-nonafluoro-1-(3-fluorophenyl)pentan-1-one **S12** as a colourless oil (3.05 g, 32%).

**b.p.** 53–54 °C, 1 mbar; <sup>1</sup>H NMR (500 MHz, CDCl<sub>3</sub>) δ<sub>H</sub>: 7.37–7.45 (1H, m, ArC(4)H), 7.50–7.58 (1H, m, ArC(5)H), 7.71–7.78 (1H, m, Ar(2)H), 7.83–7.91 (1H, m, ArC(6)H); <sup>13</sup>C NMR (126 MHz, CDCl<sub>3</sub>) δ<sub>C</sub>: 105.0–121.1, (m, CF<sub>2</sub>CF<sub>2</sub>CF<sub>2</sub>CF<sub>3</sub>), 117.1 (dt, <sup>2</sup>J<sub>CF</sub> 23.7, 3.3, ArC(2)H), 122.8 (d, <sup>2</sup>J<sub>CF</sub> 21.4, ArC(4)H), 126.1–126.3 (m, ArC(6)H), 131.0 (d, <sup>3</sup>J<sub>CF</sub> 7.6, ArC(5)H), 133.4 (app d, <sup>3</sup>J<sub>CF</sub> 6.8, ArC(1)), 162.8 (d, <sup>1</sup>J<sub>CF</sub> 249.4, ArC(3)F), 182.4 (t, <sup>2</sup>J<sub>CF</sub> 26.5, CO); <sup>19</sup>F NMR (471 MHz, CDCl<sub>3</sub>) δ<sub>F</sub>: –125.4 – –125.3 (m, CF<sub>2</sub>), –122.1 – –121.9 (m, CF<sub>2</sub>), –113.1 (t, *J* 12.6, CF<sub>2</sub>), –110.4 – –110.3 (m, ArF), –81.1 (tt, *J* 9.8, 2.8, CF<sub>3</sub>); IR (neat) ν<sub>max</sub> cm<sup>-1</sup>: 1717 (CO); HRMS (APCI<sup>+</sup>) C<sub>11</sub>H<sub>5</sub>F<sub>10</sub>O [M+H]<sup>+</sup>, found 343.0186, requires 343.0175 (+3.2 ppm).

### 2,2,3,3,3-Pentafluoro-1-(3-fluorophenyl)propan-1-one **S13**

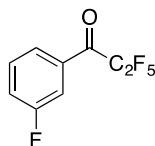

Following General Procedure B, 3-bromofluorobenzene (2.2 mL, 20 mmol), *n*-BuLi (1.65 M in hexanes, 13.3 mL, 22 mmol), ethyl pentafluoropropionate (4.14 mL, 28 mmol) and BF<sub>3</sub>·OEt<sub>2</sub> (3 mL, 24 mmol) gave, after distillation, 2,2,3,3,3-pentafluoro-1-(3-fluorophenyl)propan-1-one **S13** as a yellow oil (1.4 g, 29%).

**b.p.** 78–80 °C, 1 mbar; <sup>1</sup>H NMR (500 MHz, CDCl<sub>3</sub>) δ<sub>H</sub>: 7.40–7.46 (1H, m, ArC(4)H), 7.52–7.59 (1H, m, ArC(5)H), 7.77–7.79 (1H, m, ArC(2)H), 7.87–7.92 (1H, m, ArC(6)H); <sup>13</sup>C NMR (126 MHz, CDCl<sub>3</sub>) δ<sub>C</sub>: 105.8–121.7 (m, CF<sub>2</sub>CF<sub>3</sub>), 117.0 (dt, *J* 23.5, 2.9, ArC(2)H), 122.9 (d, *J* 21.3, ArC(4)H), 126.0–126.2 (m, ArC(6)H), 131.0 (d, *J* 7.6, ArC(5)H), 132.8 (d, *J* 6.9, ArC(1)), 162.8 (d, <sup>1</sup>J<sub>CF</sub> 249.5, ArC(3)F), 182.3 (t, <sup>2</sup>J<sub>CF</sub> 27.5, CO); <sup>19</sup>F NMR (471 MHz, CDCl<sub>3</sub>) δ<sub>F</sub>: –115.76 (CF<sub>2</sub>), –110.2 – –110.2 (m, ArF), –81.6 (CF<sub>3</sub>); IR (neat) ν<sub>max</sub> cm<sup>-1</sup>: 1717 (CO); HRMS (ESI<sup>+</sup>) C<sub>9</sub>H<sub>4</sub>F<sub>6</sub>O [M<sup>+</sup>] found 242.0169, requires 242.0161 (+3.3 ppm).

### 2,2,3,3,3-Pentafluoro-1-(4-(trifluoromethyl)phenyl)propan-1-one **S14**

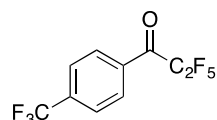

Following General Procedure B, 4-bromobenzotrifluoride (2.8 mL, 20 mmol), *n*-BuLi (2.5 M in hexanes, 8.8 mL, 22 mmol), ethyl pentafluoropropionate (4.14 mL, 28 mmol) and BF<sub>3</sub>·OEt<sub>2</sub> (3 mL, 24 mmol) gave, after column chromatography (Et<sub>2</sub>O:hexane, 3:97), 2,2,3,3,3-pentafluoro-1-(4-(trifluoromethyl)phenyl)propan-1-one **S14** as a colourless oil (1.19 g, 20%).

<sup>1</sup>H NMR (500 MHz, CDCl<sub>3</sub>) δ<sub>H</sub>: 7.80-7.86 (2H, m, ArC(3,5)H), 8.19-8.23 (2H, m, ArC(2,6)H); <sup>19</sup>F{<sup>1</sup>H} NMR (376 MHz, CDCl<sub>3</sub>) δ<sub>F</sub>: -115.9 (CF<sub>2</sub>), -81.5 (CF<sub>3</sub>), -63.6 (ArC(4)CF<sub>3</sub>). All data in accordance with the literature.<sup>4</sup>

### 2,2,3,3,3-Pentafluoro-1-(3-methoxyphenyl)propan-1-one **S15**

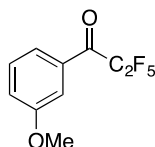

Following General Procedure B, 3-iodoanisole (2.38 mL, 20 mmol), *n*-BuLi (2.5 M in hexanes, 8.8 mL, 22 mmol), ethyl pentafluoropropionate (4.14 mL, 28 mmol) and BF<sub>3</sub>·OEt<sub>2</sub> (3 mL, 24 mmol) gave, after column chromatography (Et<sub>2</sub>O:hexanes, 3:97), 2,2,3,3,3-pentafluoro-1-(3-methoxyphenyl)propan-1-one **S15** as a colourless oil (3.93 g, 78%).

<sup>1</sup>H NMR (400 MHz, CDCl<sub>3</sub>) δ<sub>H</sub>: 3.88 (3H, s, OCH<sub>3</sub>), 7.23-7.28 (m, 1H, ArC(4)H), 7.45 (1H, ddd, *J* 8.2, 7.7, 0.4, ArC(5)H), 7.57 (1H, dd, *J* 2.6, 1.4, ArC(2)H), 7.66-7.71 (1H, m, ArC(6)H). All data in accordance with the literature.<sup>4</sup>

### 2,2,3,3,4,4,5,5,5-Nonafluoro-1-phenylpentan-1-one **S16**

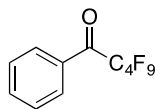

Following General Procedure B, bromobenzene (4.24 g, 40 mmol), *n*-BuLi (2.2 M in hexanes, 20 mL, 44 mmol), ethyl perfluoropentanoate (16.32 g, 56 mmol) and BF<sub>3</sub>·OEt<sub>2</sub> (5.92 mL, 48 mmol) gave, after distillation, 2,2,3,3,4,4,5,5,5-nonafluoro-1-phenylpentan-1-one **S16** as a colourless oil (9.36 g, 72%).

**b.p.** 54-56 °C, 1 mbar; {lit<sup>1</sup> 130 °C, 70 mbar}; <sup>1</sup>H NMR (500 MHz, CDCl<sub>3</sub>) δ<sub>H</sub>: 7.52-7.58 (2H, m, PhC(3,5)H), 7.69-7.74 (1H, m, PhC(4)H), 8.04-8.11 (2H, m, PhC(2,6)H); <sup>19</sup>F NMR (376 MHz, CDCl<sub>3</sub>) δ<sub>F</sub>:

-125.3 – -125.2 (m, CF<sub>2</sub>), -121.9 (app tp, *J* 9.5, 3.8, CF<sub>2</sub>), -112.9 (t, *J* 12.9, CF<sub>2</sub>), -81.0 (t, *J* 9.9, CF<sub>3</sub>). All data in accordance with the literature.<sup>4</sup>

### 2,2,3,3,3-Pentafluoro-1-(*m*-tolyl)propan-1-one **S17**

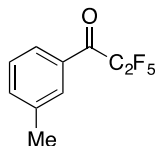

Following General Procedure B, 3-bromotoluene (2.43 mL, 20 mmol), *n*-BuLi (2.5 M in hexanes, 8.8 mL, 22 mmol), ethyl pentafluoropropionate (4.14 mL, 28 mmol) and BF<sub>3</sub>·OEt<sub>2</sub> (3 mL, 24 mmol) gave, after distillation, 2,2,3,3,3-pentafluoro-1-(*m*-tolyl)propan-1-one **S17** as a light yellow oil (2.48 g, 52%).

**b.p.** 47–48 °C, 1 mbar; <sup>1</sup>H NMR (500 MHz, CDCl<sub>3</sub>) δ<sub>H</sub>: 2.45 (3H, s, CH<sub>3</sub>), 7.40–7.46 (1H, m, ArC(5)H), 7.50–7.55 (1H, m, ArC(4)H), 7.86–7.92 (2H, m, ArC(2,6)H); <sup>13</sup>C NMR (126 MHz, CDCl<sub>3</sub>) δ<sub>C</sub>: 21.5 (CH<sub>3</sub>), 105.9–122.1 (m, CF<sub>2</sub>CF<sub>3</sub>), 127.5 (t, *J* 3.7, ArC(6)H), 129.0 (ArC(5)H), 130.6 (t, *J* 2.8, ArC(2)H), 131.1 (ArC(3)), 136.5 (ArC(4)H), 139.2 (ArC(1)), 183.5 (t, *J* 26.7, CO); <sup>19</sup>F NMR (376 MHz, CDCl<sub>3</sub>) δ<sub>F</sub>: -115.4 (CF<sub>2</sub>), -81.6 (CF<sub>3</sub>); IR (neat) ν<sub>max</sub> cm<sup>-1</sup>: 1705 (CO); HRMS (APCI<sup>+</sup>) C<sub>10</sub>H<sub>8</sub>F<sub>5</sub>O [M+H]<sup>+</sup>, found 239.0501, requires 239.0490 (+4.6 ppm).

### 2,2,3,3,3-Pentafluoro-1-(thiophen-2-yl)propan-1-one **S18**

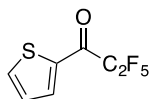

Following a modification of General Procedure B, 2-thienyllithium (1 M in THF/hexanes, 20 mL, 20 mmol), ethyl pentafluoropropionate (4.14 mL, 28 mmol) and BF<sub>3</sub>·OEt<sub>2</sub> (3 mL, 24 mmol) gave, after column chromatography (Et<sub>2</sub>O:hexane, 1:99), 2,2,3,3,3-pentafluoro-1-(thiophen-2-yl)propan-1-one **S18** as a yellow oil (2.46 g, 54%).

<sup>1</sup>H NMR (400 MHz, CDCl<sub>3</sub>) δ<sub>H</sub>: 7.26 (1H, dd, *J* 4.9, 4.0, ArC(4)H), 7.92 (1H, dd, *J* 4.9, 1.1, ArC(5)H), 8.02 (1H, ddd, *J* 3.8, 3.0, 1.7, ArC(3)H); <sup>13</sup>C{<sup>1</sup>H} NMR (101 MHz, CDCl<sub>3</sub>) δ<sub>C</sub>: 104.0–122.9 (m, CF<sub>2</sub>CF<sub>3</sub>), 129.3 (ArC(4)H), 136.7 (t, *J* 5.4, ArC(3)H), 137.4 (ArC(5)H), 138.3 (ArC(2)), 176.0 (t, *J* 27.1, CO); <sup>19</sup>F{<sup>1</sup>H} NMR (376 MHz, CDCl<sub>3</sub>) δ<sub>F</sub>: -117.4 (t, *J* 1.5, CF<sub>2</sub>), -81.7 (s, CF<sub>3</sub>); IR (neat) ν<sub>max</sub> cm<sup>-1</sup>: 1678 (CO); HRMS (APCI<sup>+</sup>) C<sub>7</sub>H<sub>4</sub>F<sub>5</sub>OS ([M+H]<sup>+</sup>), found 230.9897, requires 230.9898 (-0.2 ppm).



## Synthesis of $\beta$ -lactones

### (3*S*,4*S*)-4-(4-Bromophenyl)-4-(perfluorobutyl)-3-phenyloxetan-2-one **21**

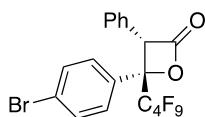

Following General Procedure C, ketone **18** (101 mg, 0.25 mmol), anhydride **17** (158 mg, 0.625 mmol), HyperBTM (4 mg, 0.0125 mmol) and *i*-Pr<sub>2</sub>NEt (54  $\mu$ L, 0.31 mmol) in CH<sub>2</sub>Cl<sub>2</sub> gave, after Biotage chromatography (0 $\rightarrow$ 2% Et<sub>2</sub>O in hexane) (3*S*,4*S*)-4-(4-bromophenyl)-4-(perfluorobutyl)-3-phenyloxetan-2-one **21** as a colourless oil (97 mg, 74%) as an inseparable mixture of diastereoisomers (> 95:5 dr).

$[\alpha]_D^{20} = +130.0$  (*c* 1.0, CHCl<sub>3</sub>); **Chiral HPLC analysis**, Chiralcel OD-H (97:3 hexane:IPA, flow rate 1.5 mLmin<sup>-1</sup>, 211 nm, 40 °C) *t*<sub>R</sub>(3*R*,4*R*): 2.8 min, *t*<sub>R</sub>(3*S*,4*S*): 3.4 min, 97:3 er; **<sup>1</sup>H NMR** (500 MHz, CDCl<sub>3</sub>)  $\delta$ <sub>H</sub>: 5.60 (1H, s, C(3)*H*), 6.84–6.89 (2H, m, PhC(2,6)*H*), 6.95 (2H, app d, *J* 8.2, C(4)ArC(2,6)*H*), 7.18–7.23 (2H, m, PhC(3,5)*H*), 7.25–7.29 (1H, m, PhC(4)*H*), 7.33 (2H, app d, *J* 8.2, C(4)ArC(3,5)*H*); **<sup>13</sup>C {<sup>1</sup>H} NMR** (126 MHz, CDCl<sub>3</sub>)  $\delta$ <sub>C</sub>: 64.6 (d, *J* 4.5, C(3)*H*), 81.0 (dd, <sup>2</sup>*J*<sub>CF</sub> 31.3, 23.4, C(4)), 105.0–119.5 (m, CF<sub>2</sub>CF<sub>2</sub>CF<sub>2</sub>CF<sub>3</sub>), 124.3 (C(4)ArC(4)), 127.7 (C(4)ArC(1)), 128.0 (PhC(1)) 129.1 (C(4)ArC(2,6)*H* + PhC(3,5)*H*), 129.6 (PhC(4)*H*), 129.8 (PhC(2,6)*H*), 131.5 (C(4)ArC(3,5)*H*), 166.0 (C(2)); **<sup>19</sup>F NMR** (471 MHz, CDCl<sub>3</sub>)  $\delta$ <sub>F</sub>: –128.0 – –124.3 (m, CF<sub>2</sub>), –122.8 – –121.3 (m, CF<sub>2</sub>), –118.5 – –115.9 (m, CF<sub>2</sub>), –80.9 – –80.8 (m, CF<sub>3</sub>); **IR** (neat)  $\nu_{\max}$  cm<sup>-1</sup>: 1854 (C=O); **HRMS** (ESI<sup>-</sup>) C<sub>19</sub>H<sub>9</sub>BrF<sub>9</sub>O<sub>2</sub> [M–H]<sup>-</sup> found 518.9652, requires 518.9648 (+0.8 ppm).

### (3*S*,4*S*)-4-(4-Bromophenyl)-4-(perfluoroethyl)-3-phenyloxetan-2-one **22**

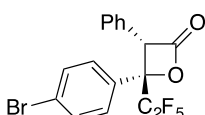

Following General Procedure C, ketone **19** (76 mg, 0.25 mmol), anhydride **17** (155 mg, 0.625 mmol), HyperBTM (4 mg, 0.0125 mmol) and *i*-Pr<sub>2</sub>NEt (54  $\mu$ L, 0.31 mmol) in CH<sub>2</sub>Cl<sub>2</sub> gave, after Biotage chromatography (0 $\rightarrow$ 5%, Et<sub>2</sub>O in hexane), (3*S*,4*S*)-4-(4-bromophenyl)-4-(perfluoroethyl)-3-phenyloxetan-2-one **22** as a colourless oil (79 mg, 75%) as an inseparable mixture of diastereoisomers (> 95:5 dr).

$[\alpha]_D^{20} = +132.9$  (*c* 1.0, CHCl<sub>3</sub>); **Chiral HPLC analysis**, Chiralcel OD-H (97:3 Hexane:IPA, flow rate 1.5 mLmin<sup>-1</sup>, 211 nm, 40 °C) *t*<sub>R</sub>(3*R*,4*R*): 3.0 min, *t*<sub>R</sub>(3*S*,4*S*): 3.8 min, 97:3 er; **<sup>1</sup>H NMR** (500 MHz, CDCl<sub>3</sub>)  $\delta$ <sub>H</sub>: 5.59 (1H, s, C(3)*H*), 6.80–6.91 (2H, m, PhC(2,6)*H*), 6.89–6.98 (2H, m, C(4)ArC(2,6)*H*), 7.18–7.24 (2H, m, PhC(3,5)*H*), 7.24–7.29 (1H, m, PhC(4)*H*), 7.31–7.36 (2H, m, C(4)ArC(3,5)*H*); **Minor diastereoisomer (selected signals)**  $\delta$ <sub>H</sub>: 5.28 (1H, s, C(3)*H*), 7.44–7.48 (3H, m, Ar*H*), 7.49–7.53 (2H, m, Ar*H*), 7.64–7.70

(2H, m, ArH);  $^{13}\text{C}\{^1\text{H}\}$  NMR (126 MHz,  $\text{CDCl}_3$ )  $\delta_{\text{C}}$ : 64.1 (d,  $^3J_{\text{CF}}$  4.1, C(3)H), 80.1 (dd,  $^2J_{\text{CF}}$  30.4, 23.5, C(4)), 110.3–122.3 (m,  $\text{CF}_2\text{CF}_3$ ), 124.4 (C(4)ArC(4)), 127.8 (d,  $^3J_{\text{CF}}$  2.8), 127.8 (C(4)ArC(1)), 128.1 (PhC(1)), 129.0 (d,  $^4J_{\text{CF}}$  2.7, C(4)ArC(2,6)H), 129.1 (PhC(3,5)H), 129.5 (PhC(4)H), 129.7 (PhC(2,6)H), 131.5 (C(4)ArC(3,5)H), 165.9 (C(2));  $^{19}\text{F}$  NMR (471 MHz,  $\text{CDCl}_3$ )  $\delta_{\text{F}}$ : -124.5 (d,  $J$  282,  $\text{CF}_2$ ), -121.7 (d,  $J$  282,  $\text{CF}_2$ ), -79.0 ( $\text{CF}_3$ ); IR (neat)  $\nu_{\text{max}}$   $\text{cm}^{-1}$ : 1853 (CO); HRMS (APCI $^+$ )  $\text{C}_{17}\text{H}_{11}\text{BrF}_5\text{O}_2$  [M+H] $^+$  found 420.9870 requires 420.9857 (+3.1 ppm).

### (3S,4S)-4-(4-Bromophenyl)-3-phenyl-4-(trifluoromethyl)oxetan-2-one **23**

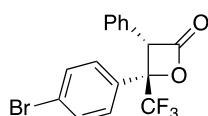

Following General Procedure D, 1-(4-bromophenyl)-2,2,2-trifluoroethan-1-one (63 mg, 0.25 mmol), anhydride **17** (155 mg, 0.625 mmol), HyperBTM (4 mg, 0.0125 mmol) and *i*-Pr $_2$ NEt (54  $\mu\text{L}$ , 0.31 mmol) in  $\text{CH}_2\text{Cl}_2$  gave, after Biotage chromatography (0 $\rightarrow$ 5% Et $_2$ O in hexane), (3S,4S)-4-(4-bromophenyl)-3-phenyl-4-(trifluoromethyl)oxetan-2-one **23** as a colourless oil (88 mg, 95%) as an inseparable mixture of diastereoisomers (> 95:5 dr).

$[\alpha]_{\text{D}}^{20} = +118.9$  (c 1.0,  $\text{CHCl}_3$ ); Chiral HPLC analysis, Chiralcel OD-H (97:3 Hexane:IPA, flow rate 1.5 mLmin $^{-1}$ , 211 nm, 40  $^{\circ}\text{C}$ )  $t_{\text{R}}$ (3R,4R): 3.2 min,  $t_{\text{R}}$ (3S,4S): 4.1 min, 95:5 er;  $^1\text{H}$  NMR (500 MHz,  $\text{CDCl}_3$ )  $\delta_{\text{H}}$ : 5.41 (1H, s, C(3)H), 6.87–6.92 (2H, m, PhC(2,6)H), 6.96 (2H, app d,  $J$  8.3, C(4)ArC(2,6)H), 7.20–7.25 (2H, m, PhC(3,5)H), 7.25–7.30 (1H, m, PhC(4)H), 7.35 (2H, app d,  $J$  8.6, C(4)ArC(3,5)H); Minor diastereoisomer (selected signals)  $\delta_{\text{H}}$ : 5.28 (1H, s, C(3)H), 7.44–7.49 (3H, m, ArH), 7.52 (2H, app d,  $J$  8.4, ArH), 7.66–7.70 (2H, m, ArH);  $^{13}\text{C}\{^1\text{H}\}$  NMR (126 MHz,  $\text{CDCl}_3$ )  $\delta_{\text{C}}$ : 63.5 (C(3)H), 80.2 (q,  $^2J_{\text{CF}}$  32.8, C(4)), 123.4 (q,  $^1J_{\text{CF}}$  282.3,  $\text{CF}_3$ ) 124.4 (C(4)ArC(4)), 127.7 (PhC(1)), 128.1 (C(4)ArC(1)), 129.0 (C(4)ArC(2,6)H), 129.2 (PhC(3,5)H), 129.5 (PhC(4)H), 129.6 (PhC(2,6)H) 131.6 (C(4)ArC(3,5)H), 165.8 (C(2));  $^{19}\text{F}$  NMR (471 MHz,  $\text{CDCl}_3$ )  $\delta_{\text{F}}$ : -78.5 ( $\text{CF}_3$ ); Minor diastereoisomer  $\delta_{\text{F}}$ : -73.4 ( $\text{CF}_3$ ); IR (neat)  $\nu_{\text{max}}$   $\text{cm}^{-1}$ : 1853 (CO); HRMS (APCI $^+$ )  $\text{C}_{16}\text{H}_{11}\text{BrF}_3\text{O}_2$  [M+H] $^+$  found 370.9895, requires 370.9889 (+1.6 ppm).

### (3S,4S)-4-(3-Fluorophenyl)-4-(perfluorobutyl)-3-phenyloxetan-2-one **24**

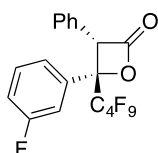

Following General Procedure C, ketone **S12** (86 mg, 0.25 mmol), anhydride **17** (158 mg, 0.625 mmol), HyperBTM (4 mg, 0.0125 mmol) and *i*-Pr $_2$ NEt (54  $\mu\text{L}$ , 0.31 mmol) in  $\text{CH}_2\text{Cl}_2$  gave, after Biotage chromatography (0 $\rightarrow$ 3% Et $_2$ O in hexane), (3S,4S)-4-(3-fluorophenyl)-4-(perfluorobutyl)-3-

phenyloxetan-2-one **24** as a colourless oil (88 mg, 77%) as an inseparable mixture of diastereoisomers (> 95:5 dr).

$[\alpha]_D^{20} = +100.5$  (*c* 1.0, CHCl<sub>3</sub>); **Chiral HPLC analysis**, Chiralpak IC (99.9:0.1 Hexane:IPA, flow rate 1.0 mLmin<sup>-1</sup>, 211 nm, 30 °C) *t*<sub>R</sub>(3*R*,4*R*): 4.4 min, *t*<sub>R</sub>(3*S*,4*S*): 5.3 min, 96:4 er; **<sup>1</sup>H NMR** (500 MHz, CDCl<sub>3</sub>) δ<sub>H</sub>: 5.62 (1H, s, C(3)*H*), 6.80–6.91 (4H, m, Ph(2,6)*H* + C(4)ArC(2,6)*H*), 6.92–6.98 (1H, m, C(4)ArC(4)*H*), 7.12–7.17 (1H, m, C(4)ArC(5)*H*), 7.17–7.22 (2H, m, Ph(3,5)*H*), 7.23–7.28 (1H, m, PhC(4)*H*); **<sup>13</sup>C{<sup>1</sup>H} NMR** (126 MHz, CDCl<sub>3</sub>) δ<sub>C</sub>: 64.8 (d, <sup>3</sup>*J*<sub>CF</sub> 4.7, C(3)*H*), 80.8 (dd, <sup>2</sup>*J*<sub>CF</sub> 30.6, 24.3, C(4)), 115.0 (d, *J* 24.4, C(4)ArC(2)*H*), 116.7 (d, *J* 21.0, C(4)ArC(4)*H*), 123.3 (C(4)ArC(6)*H*), 128.0 (PhC(1)), 129.1 (PhC(3,5)*H*), 129.5 (PhC(4)*H*), 129.7 (PhC(2,6)*H*), 129.9 (d, *J* 8.0, C(4)ArC(5)*H*), 131.1 (d, *J* 8.8, C(4)ArC(1)), 162.3 (d, <sup>1</sup>*J*<sub>CF</sub> 247.6, C(4)ArC(3)*F*), 165.9 (C(2)); **<sup>19</sup>F{<sup>1</sup>H} NMR** (471 MHz, CDCl<sub>3</sub>) δ<sub>F</sub>: -128.0 – -124.4 (m, CF<sub>2</sub>), -122.8 – -121.8 (m, CF<sub>2</sub>), -118.6 – -115.7 (m, CF<sub>2</sub>), -111.6 (Ar*F*), -80.9 – -80.8 (m, CF<sub>3</sub>); **IR** (neat) ν<sub>max</sub> cm<sup>-1</sup>: 1855 (CO); **HRMS** (APCI<sup>+</sup>) C<sub>19</sub>H<sub>10</sub>F<sub>10</sub>O<sub>2</sub><sup>+</sup> [M]<sup>+</sup> found 460.0521, requires 460.0516 (+1.2 ppm).

#### (3*S*,4*S*)-4-(3-Fluorophenyl)-4-(perfluoroethyl)-3-phenyloxetan-2-one **25**

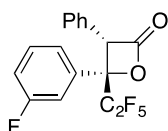

Following General Procedure C, ketone **S13** (61 mg, 0.25 mmol), anhydride **17** (158 mg, 0.625 mmol), HyperBTM (4 mg, 0.0125 mmol) and *i*-Pr<sub>2</sub>NEt (54 μL, 0.31 mmol) in CH<sub>2</sub>Cl<sub>2</sub> gave, after Biotage chromatography (0→3% Et<sub>2</sub>O in hexane), (3*S*,4*S*)-4-(3-fluorophenyl)-4-(perfluoroethyl)-3-phenyloxetan-2-one **25** as a colourless oil (59 mg, 78%) as an inseparable mixture of diastereoisomers (> 95:5 dr).

$[\alpha]_D^{20} = +92.3$  (*c* 1.0, CHCl<sub>3</sub>); **Chiral HPLC analysis**, Chiralcel OD-H (99:1 Hexane:IPA, flow rate 1.5 mLmin<sup>-1</sup>, 211 nm, 40 °C) *t*<sub>R</sub>(3*R*,4*R*): 3.5 min, *t*<sub>R</sub>(3*S*,4*S*): 5.0 min, 95:5 er; **<sup>1</sup>H NMR** (500 MHz, CDCl<sub>3</sub>) δ<sub>H</sub>: 5.61 (1H, s, C(3)*H*), 6.79–6.87 (2H, m, C(4)ArC(2,6)*H*), 6.87–6.91 (2H, m, PhC(2,6)*H*), 6.93–6.99 (1H, m, C(4)ArC(4)*H*), 7.13–7.17 (C(4)ArC(5)*H*), 7.18–7.22 (2H, m, PhC(3,5)*H*), 7.23–7.28 (1H, m, PhC(4)*H*); **<sup>13</sup>C{<sup>1</sup>H} NMR** (126 MHz, CDCl<sub>3</sub>) δ<sub>C</sub>: 64.3 (d, <sup>3</sup>*J*<sub>CF</sub> 4.2, C(3)*H*), 79.8 (dd, <sup>2</sup>*J*<sub>CF</sub> 30.4, 23.6, C(4)), 110.4–122.2 (m, CF<sub>2</sub>CF<sub>3</sub>), 114.8 (dd, <sup>2,4</sup>*J*<sub>CF</sub> 24.3, 2.7, C(4)ArC(2)*H*), 116.8 (d, <sup>2</sup>*J*<sub>CF</sub> 21.0, C(4)ArC(4)*H*), 123.2 (app t, <sup>4</sup>*J*<sub>CF</sub> 3.1, C(4)ArC(6)*H*), 128.1 (PhC(1)), 129.1 (PhC(3,5)*H*), 129.5 (PhC(4)*H*), 129.6 (PhC(2,6)*H*), 130.0 (d, *J* 8.2, C(4)ArC(5)*H*), 131.1 (dd, <sup>3</sup>*J*<sub>CF</sub> 7.9, 2.4, C(4)ArC(1)), 162.3 (d, *J* 247.5, C(4)ArC(3)*F*), 165.8 (C(2)); **<sup>19</sup>F NMR** (471 MHz, CDCl<sub>3</sub>) δ<sub>F</sub>: -124.4 (d, *J* 282.5, CF<sub>2</sub>), -121.8 – -121.1 (m, CF<sub>2</sub>), -111.6 (Ar*F*), -79.1 (CF<sub>3</sub>); **IR** (neat) ν<sub>max</sub> cm<sup>-1</sup>: 1853 (CO); **HRMS** (APCI<sup>+</sup>) C<sub>17</sub>H<sub>10</sub>O<sub>2</sub>F<sub>6</sub><sup>+</sup> [M]<sup>+</sup> found 360.0585 requires 360.0580 (+1.4 ppm).

**(3S,4S)-4-(3-Fluorophenyl)-3-phenyl-4-(trifluoromethyl)oxetan-2-one 26**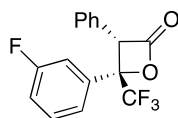

Following General Procedure D, 2,2,2-trifluoro-1-(3-fluorophenyl)ethan-1-one (48 mg, 0.25 mmol), anhydride **17** (158 mg, 0.625 mmol), HyperBTM (4 mg, 0.0125 mmol) and *i*-Pr<sub>2</sub>NEt (54 μL, 0.31 mmol) in CH<sub>2</sub>Cl<sub>2</sub> gave, after Biotage chromatography (0→3% Et<sub>2</sub>O in hexane), (3S,4S)-4-(3-fluorophenyl)-3-phenyl-4-(trifluoromethyl)oxetan-2-one **26** as a colourless oil (53 mg, 68%) as an inseparable mixture of diastereoisomers (> 95:5 dr).

$[\alpha]_D^{20} = +130.6$  (*c* 1.0, CHCl<sub>3</sub>); **Chiral HPLC analysis**, Chiralcel OD-H (97:3 Hexane:IPA, flow rate 1.5 mLmin<sup>-1</sup>, 211 nm, 40 °C) *t<sub>R</sub>*(3*R*,4*R*): 3.2 min, *t<sub>R</sub>*(3*S*,4*S*): 3.9 min, 97:3 er; **<sup>1</sup>H NMR** (500 MHz, CDCl<sub>3</sub>) δ<sub>H</sub>: 5.42 (1H, s, C(3)*H*), 6.63–6.69 (2H, m, C(4)ArC(4,6)*H*), 6.69–6.73 (2H, m, PhC(3,5)*H*), 6.74–6.80 (1H, m, C(4)ArC(2)*H*), 6.95–7.06 (4H, m, Ph(2,4,6)*H* + C(4)ArC(5)*H*); *Minor diastereoisomer (selected signals)* δ<sub>H</sub>: 5.31 (1H, s, C(3)*H*); **<sup>13</sup>C{<sup>1</sup>H} NMR** (126 MHz, CDCl<sub>3</sub>) δ<sub>C</sub>: 63.7 (C(3)*H*), 80.0 (q, <sup>2</sup>*J*<sub>CF</sub> 32.8, C(4)), 114.8 (d, <sup>2</sup>*J*<sub>CF</sub> 24.4, C(4)ArC(4)*H*), 116.8 (d, <sup>2</sup>*J*<sub>CF</sub> 21.0, C(4)ArC(2)*H*), 123.1 (d, <sup>4</sup>*J*<sub>CF</sub> 3.1, C(4)ArC(6)*H*), 123.5 (q, <sup>1</sup>*J*<sub>CF</sub> 282.3, CF<sub>3</sub>), 128.1 (PhC(1)), 129.1 (PhC(4)*H*), 129.4 (PhC(2,6)*H*), 129.5 (PhC(3,5)*H*), 130.1 (d, <sup>3</sup>*J*<sub>CF</sub> 8.2, C(4)ArC(5)*H*), 131.1 (d, <sup>3</sup>*J*<sub>CF</sub> 7.6, C(4)ArC(1)), 162.4 (d, <sup>1</sup>*J*<sub>CF</sub> 247.6, C(4)ArC(3)F), 165.8 (C(2)); **<sup>19</sup>F NMR** (471 MHz, CDCl<sub>3</sub>) δ<sub>F</sub>: -111.6 (ArF), -78.2 (CF<sub>3</sub>); *Minor diastereoisomer* δ<sub>F</sub>: -110.4 (ArF), -73.2 (CF<sub>3</sub>); **IR** (neat) ν<sub>max</sub> cm<sup>-1</sup>: 1855 (CO); **HRMS** (APCI<sup>+</sup>) C<sub>16</sub>H<sub>10</sub>F<sub>4</sub>O<sub>2</sub><sup>+</sup> [M]<sup>+</sup> found 310.0616, requires 310.0611 (+1.6 ppm).

**(3S,4S)-4-(Perfluoroethyl)-3-phenyl-4-(4-(trifluoromethyl)phenyl)oxetan-2-one 27**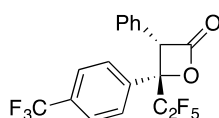

Following General Procedure C, ketone **S14** (73 mg, 0.25 mmol), anhydride **17** (158 mg, 0.625 mmol), HyperBTM (4 mg, 0.0125 mmol) and *i*-Pr<sub>2</sub>NEt (54 μL, 0.31 mmol) in CH<sub>2</sub>Cl<sub>2</sub> gave, after Biotage chromatography (0→5% Et<sub>2</sub>O in hexane), (3S,4S)-4-(perfluoroethyl)-3-phenyl-4-(4-(trifluoromethyl)phenyl)oxetan-2-one **27** as a colourless oil (97 mg, 94%) as an inseparable mixture of diastereoisomers (> 95:5 dr).

$[\alpha]_D^{20} = +107.8$  (*c* 1.0, CHCl<sub>3</sub>); **Chiral HPLC analysis**, Chiralcel OD-H (97:3 Hexane:IPA, flow rate 1.5 mLmin<sup>-1</sup>, 211 nm, 40 °C) *t<sub>R</sub>*(3*R*,4*R*): 2.8 min, *t<sub>R</sub>*(3*S*,4*S*): 3.8 min, 94:6 er; **<sup>1</sup>H NMR** (500 MHz, CDCl<sub>3</sub>) δ<sub>H</sub>: 5.65 (1H, s, C(3)*H*), 6.84–6.89 (2H, m, PhC(2,6)*H*), 7.15–7.29 (5H, m, PhC(3,4,5)*H* + C(4)ArC(2,6)*H*), 7.46–7.48 (2H, m, C(4)ArC(3,5)*H*); *Minor diastereoisomer (selected signals)* δ<sub>H</sub>: 5.31 (1H, s, C(3)*H*);

$^{13}\text{C}\{^1\text{H}\}$  NMR (126 MHz,  $\text{CDCl}_3$ )  $\delta_{\text{C}}$ : 64.4 (d,  $^3J_{\text{CF}}$  4.3, C(3)H), 80.0 (dd,  $^2J_{\text{CF}}$  30.5, 23.6, C(4)), 110.2–122.3 ( $\text{CF}_2\text{CF}_3$ ), 123.7 (q,  $^1J_{\text{CF}}$  272.5,  $\text{ArCF}_3$ ), 125.2 (q,  $^3J_{\text{CF}}$  3.8, C(4)ArC(3,5)H), 127.9 (PhC(1)), 128.0 (q,  $J$  2.8, C(4)ArC(2,6)H), 129.2 (PhC(3,5)H), 129.7 (PhC(2,6)H), 129.7 (PhC(4)H), 131.8 (q,  $^2J_{\text{CF}}$  32.9, C(4)ArC(4)), 132.8 (C(4)ArC(1)), 165.6 (C(2));  $^{19}\text{F}$  NMR (471 MHz,  $\text{CDCl}_3$ )  $\delta_{\text{F}}$ : -124.42 (d,  $J$  282.4,  $\text{CF}_2$ ), -121.49 (d,  $J$  282.7,  $\text{CF}_2$ ), -79.02 ( $\text{CF}_2\text{CF}_3$ ), -63.10 ( $\text{Ar-CF}_3$ ); *Minor diastereoisomer*  $\delta_{\text{F}}$ : -121.9 (d,  $J$  288.1,  $\text{CF}_2$ ), -119.5 (d,  $J$  288.1,  $\text{CF}_2$ ), -79.5 ( $\text{CF}_2\text{CF}_3$ ), -63.0 ( $\text{Ar-CF}_3$ ); IR (neat)  $\nu_{\text{max}}$   $\text{cm}^{-1}$ : 1853 (CO); HRMS (APCI $^+$ )  $\text{C}_{18}\text{H}_{10}\text{F}_8\text{O}_2^+$  [M] $^+$  found 410.0550, requires 410.0548 (+0.5 ppm).

### (3*S*,4*S*)-4-(3-Methoxyphenyl)-4-(perfluoroethyl)-3-phenyloxetan-2-one **28**

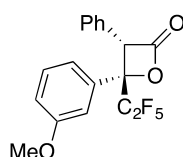

Following General Procedure C, ketone **S15** (64 mg, 0.25 mmol), anhydride **17** (158 mg, 0.625 mmol), HyperBTM (4 mg, 0.0125 mmol) and *i*-Pr $_2$ NEt (54  $\mu\text{L}$ , 0.31 mmol) in  $\text{CH}_2\text{Cl}_2$  gave, after Biotage chromatography (0 $\rightarrow$ 3% Et $_2$ O in hexane), (3*S*,4*S*)-4-(3-methoxyphenyl)-4-(perfluoroethyl)-3-phenyloxetan-2-one **28** as a colourless oil (88 mg, 95%) as an inseparable mixture of diastereoisomers (> 95:5 dr).

$[\alpha]_{\text{D}}^{20} = +112.6$  (c 1.0,  $\text{CHCl}_3$ ); **Chiral HPLC analysis**, Chiralcel OD-H (97:3 Hexane:IPA, flow rate 1.5 mLmin $^{-1}$ , 211 nm, 40  $^{\circ}\text{C}$ )  $t_{\text{R}}$ (3*R*,4*R*): 3.1 min,  $t_{\text{R}}$ (3*S*,4*S*): 3.7 min, 88:12 er;  $^1\text{H}$  NMR (500 MHz,  $\text{CDCl}_3$ )  $\delta_{\text{H}}$ : 3.60 (3H, s, OCH $_3$ ), 5.58 (1H, s, C(3)H), 6.56 (1H, br s, C(4)ArC(2)H), 6.62–6.68 (1H, m, C(4)ArC(6)H), 6.75–6.81 (1H, m, C(4)ArC(4)H), 6.87–6.92 (2H, m, PhC(2,6)H), 7.09 (1H, app t,  $J$  8.0, C(4)ArC(5)H), 7.17–7.22 (2H, m, Ph(3,5)H), 7.22–7.26 (1H, m, PhC(4)H);  $^{13}\text{C}\{^1\text{H}\}$  NMR (126 MHz,  $\text{CDCl}_3$ )  $\delta_{\text{C}}$ : 55.3 (OCH $_3$ ), 64.0 (d,  $^3J_{\text{CF}}$  4.2, C(3)H), 80.3 (dd,  $^2J_{\text{CF}}$  30.1, 23.1, C(4)), 110.3–120.4 (m,  $\text{CF}_2\text{CF}_3$ ), 112.7 (d,  $J$  2.8, C(4)ArC(2)H), 115.6 (C(4)ArC(4)H), 119.8 (d,  $J$  2.8, C(4)ArC(6)H), 128.5 (PhC(1)), 128.9 (PhC(3,5)H), 129.3 (PhC(4)H), 129.3 (C(4)ArC(5)H), 129.8 (PhC(2,6)H), 129.9 (d,  $J$  3.0, C(4)ArC(1)), 159.3 (C(4)ArC(3)OMe), 166.4 (C(2));  $^{19}\text{F}$  NMR (471 MHz,  $\text{CDCl}_3$ )  $\delta_{\text{F}}$ : -124.3 (d,  $J$  281.6,  $\text{CF}_2$ ), -121.5 (d,  $J$  281.5,  $\text{CF}_2$ ), -79.1 (m,  $\text{CF}_3$ ); IR (neat)  $\nu_{\text{max}}$   $\text{cm}^{-1}$ : 1852 (CO); HRMS (NSI $^+$ )  $\text{C}_{18}\text{H}_{17}\text{F}_5\text{NO}_3^+$  [M+NH $_4$ ] $^+$  found 390.1125, requires 390.1123 (+0.5 ppm).

### (3*S*,4*S*)-4-(Perfluorobutyl)-3,4-diphenyloxetan-2-one **29**

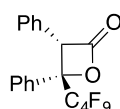

Following General Procedure C, ketone **S16** (81 mg, 0.25 mmol), anhydride **17** (158 mg, 0.625 mmol), HyperBTM (4 mg, 0.0125 mmol) and *i*-Pr $_2$ NEt (54  $\mu\text{L}$ , 0.31 mmol) in  $\text{CH}_2\text{Cl}_2$  gave, after Biotage

chromatography (0→5% Et<sub>2</sub>O in hexane), (3*S*,4*S*)-4-(perfluorobutyl)-3,4-diphenyloxetan-2-one **29** as a colourless oil (55 mg, 50%) as an inseparable mixture of diastereoisomers (> 95:5 dr).

$[\alpha]_D^{20} = +72.1$  (*c* 0.4, CHCl<sub>3</sub>); **Chiral HPLC analysis**, Chiralpak IC (99.9:0.1 Hexane:IPA, flow rate 1 mLmin<sup>-1</sup>, 211 nm, 30 °C) *t*<sub>R</sub>(3*R*,4*R*): 3.3 min, *t*<sub>R</sub>(3*S*,4*S*): 3.9 min, 98:2 er; **<sup>1</sup>H NMR** (500 MHz, CDCl<sub>3</sub>) δ<sub>H</sub>: 5.59 (1H, s, C(3)*H*), 6.83–6.88 (2H, m, C(3)PhC(2,6)*H*), 7.05–7.11 (2H, m, C(4)PhC(2,6)*H*), 7.13–7.20 (4H, m, C(3)PhC(3,5)*H* + C(4)PhC(3,5)*H*), 7.20–7.27 (2H, m, C(3)PhC(4)*H* + C(4)PhC(4)*H*); **<sup>13</sup>C{<sup>1</sup>H} NMR** (126 MHz, CDCl<sub>3</sub>) δ<sub>C</sub>: 64.3 (d, <sup>3</sup>*J*<sub>CF</sub> 4.5, C(3)*H*), 81.1 (dd, *J* 30.8, 23.1, C(4)), 108–119 (m, CF<sub>2</sub>CF<sub>2</sub>CF<sub>2</sub>CF<sub>3</sub>), 127.3 (C(4)PhC(2,6)*H*), 127.9 (C(4)PhC(3,5)*H*), 128.1 (C(3)ArC(1)), 128.3 (C(4)ArC(1)), 128.6 (C(3)PhC(3,5)*H*), 129.0 (C(3)PhC(4)*H*), 129.2 (C(4)PhC(4)*H*), 129.6 (C(3)PhC(2,6)*H*), 166.2 (C(2)); **<sup>19</sup>F NMR** (471 MHz, CDCl<sub>3</sub>) δ<sub>F</sub>: -128.0 – -124.5 (m, CF<sub>2</sub>), -123.0 – -121.3 (m, CF<sub>2</sub>), -118.8 – -115.6 (m, CF<sub>2</sub>), -80.8 (dd, *J* 11.4, 8.2, CF<sub>3</sub>); **IR** (neat) ν<sub>max</sub> cm<sup>-1</sup>: 1846 (CO); **HRMS** (NSI<sup>+</sup>) C<sub>19</sub>H<sub>15</sub>NF<sub>9</sub>O<sub>2</sub><sup>+</sup> [M+NH<sub>4</sub>]<sup>+</sup> found 460.0950 requires 460.0954 (-0.9 ppm).

#### (3*S*,4*S*)-4-(Perfluoroethyl)-3-phenyl-4-(*m*-tolyl)oxetan-2-one **30**

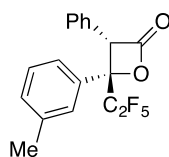

Following General Procedure C, ketone **S17** (60 mg, 0.25 mmol), anhydride **17** (158 mg, 0.625 mmol), HyperBTM (4 mg, 0.0125 mmol) and *i*-Pr<sub>2</sub>NEt (54 μL, 0.31 mmol) in CH<sub>2</sub>Cl<sub>2</sub> gave, after Biotage chromatography (0→3% Et<sub>2</sub>O in hexane), (3*S*,4*S*)-4-(perfluoroethyl)-3-phenyl-4-(*m*-tolyl)oxetan-2-one **30** as a colourless oil (29 mg, 49%) as an inseparable mixture of diastereoisomers (> 95:5 dr).

$[\alpha]_D^{20} = +97.5$  (*c* 0.5, CHCl<sub>3</sub>); **Chiral HPLC analysis**, Chiralcel OD-H (99.5:0.5 Hexane:IPA, flow rate 1.5 mLmin<sup>-1</sup>, 211 nm, 40 °C) *t*<sub>R</sub>(3*R*,4*R*): 3.5 min, *t*<sub>R</sub>(3*S*,4*S*): 4.9 min, 92:8 er; **<sup>1</sup>H NMR** (500 MHz, CDCl<sub>3</sub>) δ<sub>H</sub>: 2.18 (3H, s, CH<sub>3</sub>), 5.56 (1H, s, C(3)*H*), 6.79–6.84 (1H, br m, C(4)Ar*H*), 6.84–6.90 (3H, m, PhC(2,6)*H* + C(4)Ar*H*), 7.03–7.06 (2H, m, C(4)Ar*H*), 7.16–7.20 (2H, m, PhC(3,5)*H*), 7.21–7.25 (1H, m, PhC(4)*H*); **Minor diastereoisomer (selected signals)** δ<sub>H</sub>: 2.46 (3H, s, CH<sub>3</sub>), 5.30 (1H, s, C(3)*H*); **<sup>13</sup>C{<sup>1</sup>H} NMR** (126 MHz, CDCl<sub>3</sub>) δ<sub>C</sub>: 20.4 (CH<sub>3</sub>), 63.0 (d, <sup>3</sup>*J*<sub>CF</sub> 4.1, C(3)*H*), 123.5 (C(4)ArCH), 127.0 (C(4)ArCH), 127.0 (C(4)ArCH), 127.4 (PhC(1)), 127.5 (C(4)ArC(1)), 127.8 (PhC(3,5)*H*), 128.2 (PhC(4)*H*), 128.8 (PhC(2,6)*H*), 129.2 (C(4)ArCH), 137.0 (C(4)ArC(3)), 165.6 (C(2)); C(4) and CF<sub>2</sub>CF<sub>3</sub> not observed; **<sup>19</sup>F NMR** (471 MHz, CDCl<sub>3</sub>) δ<sub>F</sub>: -124.34 (d, *J* 281.2, CF<sub>2</sub>), -121.63 (d, *J* 280.7, CF<sub>2</sub>), -79.04 (d, *J* 1.6, CF<sub>3</sub>); **Minor diastereoisomer** δ<sub>F</sub>: -121.9 (d, *J* 287.5, CF<sub>2</sub>), -119.0 (d, *J* 286.9, CF<sub>2</sub>), -79.6 (CF<sub>3</sub>); **IR** (neat) ν<sub>max</sub> cm<sup>-1</sup>: 1853 (CO); **HRMS** (APCI<sup>+</sup>) C<sub>18</sub>H<sub>14</sub>F<sub>5</sub>O<sub>2</sub><sup>+</sup> [M+H]<sup>+</sup> found 357.0922 requires 357.0908 (+3.9 ppm).

### (3*S*,4*S*)-3-Phenyl-4-(*p*-tolyl)-4-(trifluoromethyl)oxetan-2-one **32**

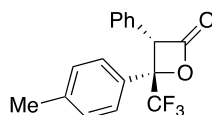

Following General Procedure D, 4-(trifluoroacetyl)toluene (47 mg, 0.25 mmol), anhydride **17** (158 mg, 0.625 mmol), HyperBTM (4 mg, 0.0125 mmol) and *i*-Pr<sub>2</sub>NEt (54  $\mu$ L, 0.31 mmol) in CH<sub>2</sub>Cl<sub>2</sub> gave, after Biotage chromatography (0 $\rightarrow$ 3% Et<sub>2</sub>O in hexane), (3*S*,4*S*)-4-(3-fluorophenyl)-3-phenyl-4-(trifluoromethyl)oxetan-2-one **32** as a colourless oil (59 mg, 78%) as an inseparable mixture of diastereoisomers (90:10 dr).

$[\alpha]_D^{20} = +150.9$  (*c* 0.5, CHCl<sub>3</sub>); **Chiral HPLC analysis**, Chiralcel OD-H (97:3 Hexane:IPA, flow rate 1.5 mLmin<sup>-1</sup>, 211 nm, 40 °C) *t*<sub>R</sub>(3*R*,4*R*): 3.0 min, *t*<sub>R</sub>(3*S*,4*S*): 3.4 min, 99:1 er; <sup>1</sup>H NMR (500 MHz, CDCl<sub>3</sub>)  $\delta$ <sub>H</sub>: 2.26 (3H, s, CH<sub>3</sub>), 5.38 (1H, s, C(3)H), 6.88–6.93 (2H, m, PhC(2,6)H), 6.97 (2H, d, *J* 8.2, C(4)ArC(2,6)H), 7.01 (2H, d, *J* 8.2, C(4)ArC(3,5)H), 7.17–7.22 (2H, m, PhC(3,5)H), 7.22–7.26 (1H, m, PhC(4)H); *Minor diastereoisomer (selected signals)*  $\delta$ <sub>H</sub>: 2.44 (3H, s, CH<sub>3</sub>), 5.31 (1H, s, C(3)H); <sup>13</sup>C{<sup>1</sup>H} NMR (126 MHz, CDCl<sub>3</sub>)  $\delta$ <sub>C</sub>: 21.3 (CH<sub>3</sub>), 63.3 (C(3)H), 80.6 (q, <sup>3</sup>*J*<sub>CF</sub> 32.6, C(4)), 123.8 (q, <sup>1</sup>*J*<sub>CF</sub> 281.5, CF<sub>3</sub>), 125.5 (C(4)ArC(1)), 127.3 (C(4)ArC(2,6)H), 128.6 (PhC(1)), 128.9 (PhC(3,5)H), 129.0 (C(4)ArC(3,5)H), 129.2 (PhC(4)H), 129.7 (PhC(2,6)H), 139.6 (C(4)ArC(4)Me), 166.5 (C(2)); <sup>19</sup>F NMR (471 MHz, CDCl<sub>3</sub>)  $\delta$ <sub>F</sub>: -78.6 (CF<sub>3</sub>); *Minor diastereoisomer*  $\delta$ <sub>F</sub>: -73.5 (CF<sub>3</sub>); **IR** (neat)  $\nu_{\max}$  cm<sup>-1</sup>: 1849 (CO); **HRMS** (NSI<sup>+</sup>) C<sub>17</sub>H<sub>13</sub>F<sub>3</sub>O<sub>2</sub>Na<sup>+</sup> [M+Na]<sup>+</sup> found 329.0759, requires 329.0765 (-0.3 ppm).

### (3*S*,4*S*)-4-(4-Methoxyphenyl)-3-phenyl-4-(trifluoromethyl)oxetan-2-one **33**

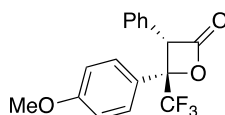

Following General Procedure D, 2,2,2-trifluoro-1-(4-methoxyphenyl)ethanone (51 mg, 0.25 mmol), anhydride **17** (158 mg, 0.625 mmol), HyperBTM (4 mg, 0.0125 mmol) and *i*-Pr<sub>2</sub>NEt (54  $\mu$ L, 0.31 mmol) in CH<sub>2</sub>Cl<sub>2</sub> gave, after Biotage chromatography (0 $\rightarrow$ 3% Et<sub>2</sub>O in hexane), (3*S*,4*S*)-4-(4-methoxyphenyl)-3-phenyl-4-(trifluoromethyl)oxetan-2-one **33** as a colourless oil (18 mg, 22%) as an inseparable mixture of diastereoisomers (> 95:5 dr).

$[\alpha]_D^{20} = +163.6$  (*c* 0.5, CHCl<sub>3</sub>); **Chiral HPLC analysis**, Chiralcel OD-H (97:3 Hexane:IPA, flow rate 1.5 mLmin<sup>-1</sup>, 211 nm, 40 °C) *t*<sub>R</sub>(3*R*,4*R*): 3.6 min, *t*<sub>R</sub>(3*S*,4*S*): 4.5 min, 99:1 er; <sup>1</sup>H NMR (500 MHz, CDCl<sub>3</sub>)  $\delta$ <sub>H</sub>: 3.74 (3H, s, OCH<sub>3</sub>), 5.37 (1H, s, C(3)H), 6.68–6.74 (2H, m, C(4)ArC(3,5)H), 6.86–6.94 (2H, m, PhC(2,6)H), 6.98–7.02 (2H, m, C(4)ArC(2,6)H), 7.18–7.22 (2H, m, PhC(3,5)H), 7.23–7.26 (1H, m, PhC(4)H); <sup>13</sup>C{<sup>1</sup>H} NMR (126 MHz, CDCl<sub>3</sub>)  $\delta$ <sub>C</sub>: 55.3 (OCH<sub>3</sub>), 63.3 (C(3)H), 80.5 (q, <sup>3</sup>*J*<sub>CF</sub> 32.6, C(4)), 113.7 (C(4)ArC(3,5)H), 120.4 (C(4)ArC(1)), 123.8 (q, *J* 282.1, CF<sub>3</sub>), 128.6 (PhC(1)), 128.8 (C(4)ArC(2,6)H),

129.0 (PhC(3,5)H), 129.2 (PhC(4)H), 129.7 (PhC(2,6)H), 160.4 (C(4)ArC(4)OMe), 166.5 (C(2)); <sup>19</sup>F NMR (471 MHz, CDCl<sub>3</sub>) δ<sub>F</sub>: -78.8 (CF<sub>3</sub>); IR (neat) ν<sub>max</sub> cm<sup>-1</sup>: 1851 (CO); HRMS (APCI<sup>+</sup>) C<sub>17</sub>H<sub>14</sub>F<sub>3</sub>O<sub>3</sub><sup>+</sup> [M+H]<sup>+</sup> found 323.0896, requires 323.0890 (+1.9 ppm).

#### (3*S*,4*R*)-4-(Perfluoroethyl)-3-phenyl-4-(thiophen-2-yl)oxetan-2-one **34**

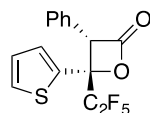

Following General Procedure C, ketone **S18** (57 mg, 0.25 mmol), anhydride **17** (158 mg, 0.625 mmol), HyperBTM (4 mg, 0.0125 mmol) and *i*-Pr<sub>2</sub>NEt (54 μL, 0.31 mmol) in CH<sub>2</sub>Cl<sub>2</sub> gave, after Biotage chromatography (0→3% Et<sub>2</sub>O in hexane), (3*S*,4*R*)-4-(perfluoroethyl)-3-phenyl-4-(thiophen-2-yl)oxetan-2-one **34** as a colourless oil (37 mg, 43%) as an inseparable mixture of diastereoisomers (> 95:5 dr).

[α]<sub>D</sub><sup>20</sup> = +84.1 (c 1.0, CHCl<sub>3</sub>); **Chiral HPLC analysis**, Chiralcel OD-H (99.9:0.1 Hexane:IPA, flow rate 1.5 mLmin<sup>-1</sup>, 211 nm, 40 °C) t<sub>R</sub>(3*R*,4*S*): 5.5 min, t<sub>R</sub>(3*S*,4*R*): 11.9 min, 87:13 er; <sup>1</sup>H NMR (500 MHz, CDCl<sub>3</sub>) δ<sub>H</sub>: 5.65 (1H, s, C(3)H), 6.80 (1H, dd, *J* 3.4, 1.7, C(4)ArC(3)H), 6.87 (1H, dd, *J* 5.1, 3.7, C(4)ArC(4)H), 6.98–7.02 (2H, m, PhC(2,6)H), 7.21–2.27 (2H, m, PhC(3,5)H), 7.28–7.32 (2H, m, PhC(4)H + C(4)ArC(5)H); <sup>13</sup>C{<sup>1</sup>H} NMR (126 MHz, CDCl<sub>3</sub>) δ<sub>C</sub>: 64.8 (d, *J* 4.1, C(3)H), 79.6 (dd, *J* 32.8, 25.1, C(4)), 110.0–124.0 (m, CF<sub>2</sub>CF<sub>3</sub>), 127.2 (C(4)ArC(4)H), 128.3 (C(4)ArC(5)H), 128.5 (C(4)ArC(3)H), 128.8 (PhC(4)H), 128.9 (PhC(3,5)H), 129.3 (PhC(2,6)H), 129.4 (PhC(1)), 130.6 (d, *J* 3.8, C(4)ArC(2)), 165.7 (C(2)); <sup>19</sup>F NMR (471 MHz, CDCl<sub>3</sub>) δ<sub>F</sub>: -124.8 (d, *J* 281.9, CF<sub>2</sub>), -122.2 (d, *J* 282.0, CF<sub>2</sub>), -79.0 (CF<sub>3</sub>); IR (neat) ν<sub>max</sub> cm<sup>-1</sup>: 1857 (CO); HRMS (APCI<sup>+</sup>) C<sub>15</sub>H<sub>10</sub>O<sub>2</sub>F<sub>5</sub>S<sup>+</sup> [M+H]<sup>+</sup> found 349.0322 requires 349.0316 (+1.7 ppm).

#### (3*S*,4*R*)-4-Methyl-3-phenyl-4-(trifluoromethyl)oxetan-2-one **35**

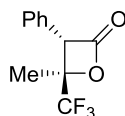

Following a modification to General Procedure D (change in equivalencies and temperature), trifluoroacetone (90 μL, 1 mmol), anhydride **17** (102 mg, 0.4 mmol), HyperBTM (6.2 mg, 0.02 mmol) and *i*-Pr<sub>2</sub>NEt (87 μL, 0.5 mmol) in CH<sub>2</sub>Cl<sub>2</sub> at 0 °C, gave, after Biotage chromatography (0→3% Et<sub>2</sub>O in hexane), (3*S*,4*R*)-4-methyl-3-phenyl-4-(trifluoromethyl)oxetan-2-one **35** as a colourless oil (84 mg, 91%). *Note: product moderately volatile – can be lost if left under high vacuum for long periods.*

[α]<sub>D</sub><sup>20</sup> = +104.0 (c 1.0, CHCl<sub>3</sub>); **Chiral HPLC analysis**, Chiralcel OD-H (97:3 Hexane:IPA, flow rate 1.5 mLmin<sup>-1</sup>, 254 nm, 40 °C) t<sub>R</sub>(3*R*,4*S*): 2.9 min, t<sub>R</sub>(3*S*,4*R*): 3.3 min, 93:7 er; <sup>1</sup>H NMR (400 MHz, CDCl<sub>3</sub>) δ<sub>H</sub>:



1.35 (3H, q,  $J$  0.9,  $\text{CH}_3$ ), 5.17 (1H, s,  $\text{C}(3)\text{H}$ ), 7.19–7.25 (2H, m,  $\text{PhC}(2,6)\text{H}$ ), 7.35–7.48 (3H, m,  $\text{PhC}(3,4,5)\text{H}$ );  $^{13}\text{C}\{^1\text{H}\}$  NMR (126 MHz,  $\text{CDCl}_3$ )  $\delta_{\text{C}}$ : 15.3 ( $\text{CH}_3$ ), 60.1 ( $\text{C}(3)\text{H}$ ), 77.9 (q,  $J$  33.6,  $\text{C}(4)$ ), 124.2 (q,  $J$  281,  $\text{CF}_3$ ), 128.3 ( $\text{PhC}(3,5)\text{H}$ ), 128.8 ( $\text{PhC}(1)$ ), 129.2 ( $\text{PhC}(4)\text{H}$ ), 129.5 ( $\text{PhC}(2,6)\text{H}$ ), 165.8 ( $\text{C}(2)$ );  $^{19}\text{F}$  NMR (471 MHz,  $\text{CDCl}_3$ )  $\delta_{\text{F}}$  -81.6 ( $\text{CF}_3$ ); IR (neat)  $\nu_{\text{max}}$   $\text{cm}^{-1}$ : 1848 (CO), 1456, 1159, 1098, 1042; HRMS (APCI<sup>+</sup>)  $\text{C}_{11}\text{H}_{10}\text{O}_2\text{F}_3$   $[\text{M}+\text{H}]^+$  found 231.0633 requires 231.0633 (+0.0 ppm).

### (3*S*,4*S*)-4-(4-Bromophenyl)-3-(4-dimethylaminophenyl)-4-(perfluorobutyl)oxetan-2-one **36**

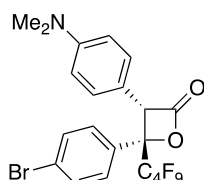

Following General Procedure C, ketone **18** (100 mg, 0.25 mmol), anhydride **S1** (213 mg, 0.63 mmol), HyperBTM (4 mg, 0.0125 mmol) *i*-Pr<sub>2</sub>NEt (54  $\mu\text{L}$ , 0.31 mmol) in  $\text{CH}_2\text{Cl}_2$  gave, after Biotage chromatography (0→5%  $\text{Et}_2\text{O}$  in hexane), (3*S*,4*S*)-4-(4-bromophenyl)-3-(4-dimethylaminophenyl)-4-(perfluorobutyl)oxetan-2-one **36** as a colourless oil (130.1 mg, 92%) as an inseparable mixture of diastereoisomers (> 95:5 dr).

$[\alpha]_{\text{D}}^{20} = +139.1$  ( $c$  1.0,  $\text{CHCl}_3$ ); Chiral HPLC analysis, Chiralcel OD-H (97:3 Hexane:IPA, flow rate 1.5  $\text{mLmin}^{-1}$ , 211 nm, 40 °C)  $t_{\text{R}}(3R,4R)$ : 3.8 min,  $t_{\text{R}}(3S,4S)$ : 4.6 min, 97:3 er;  $^1\text{H}$  NMR (500 MHz,  $\text{CDCl}_3$ )  $\delta_{\text{H}}$ : 2.90 (6H, s,  $\text{N}(\text{CH}_3)_2$ ), 5.52 (1H, s,  $\text{C}(3)\text{H}$ ), 6.46–6.51 (2H, m,  $\text{C}(3)\text{ArC}(3,5)\text{H}$ ), 6.65–6.71 (2H, m,  $\text{C}(3)\text{ArC}(2,6)\text{H}$ ), 6.94–7.01 (2H, m,  $\text{C}(4)\text{ArC}(2,6)\text{H}$ ), 7.29–7.41 (2H, m,  $\text{C}(4)\text{ArC}(3,5)\text{H}$ ); Minor diastereoisomer (selected signals)  $\delta_{\text{H}}$ : 3.00 (6H, s,  $\text{NCH}_3$ ), 5.18 (1H, s,  $\text{C}(3)\text{H}$ );  $^{13}\text{C}\{^1\text{H}\}$  NMR (126 MHz,  $\text{CDCl}_3$ )  $\delta_{\text{C}}$ : 40.2 ( $\text{N}(\text{CH}_3)_2$ ), 64.4 (d,  $^3J_{\text{CF}}$  4.4,  $\text{C}(3)$ ), 81.2 (dd,  $^2J_{\text{CF}}$  31.5, 23.4,  $\text{C}(4)$ ), 108.0–119.0 (m, 3 x  $\text{CF}_2$  &  $\text{CF}_3$ ), 112.1 ( $\text{C}(3)\text{ArC}(3,5)\text{H}$ ), 114.5 ( $\text{C}(3)\text{ArC}(1)$ ), 124.1 ( $\text{C}(4)\text{ArC}(1)$ ), 128.2 ( $\text{C}(4)\text{ArC}(4)$ ), 129.4 ( $\text{C}(4)\text{ArC}(2,6)\text{H}$ ), 130.7 ( $\text{C}(3)\text{ArC}(2,6)\text{H}$ ), 131.4 ( $\text{C}(4)\text{ArC}(3,5)\text{H}$ ), 150.8 ( $\text{C}(3)\text{ArC}(4)$ ), 167.3 ( $\text{C}(2)$ );  $^{19}\text{F}\{^1\text{H}\}$  NMR (471 MHz,  $\text{CDCl}_3$ )  $\delta_{\text{F}}$ : -127.9 – -124.5 (m,  $\text{CF}_2$ ), -122.8 – -121.7 (m,  $\text{CF}_2$ ), -118.6 – -116.1 (m,  $\text{CF}_2$ ), -82.5 – -78.5 (m,  $\text{CF}_3$ ); IR (neat)  $\nu_{\text{max}}$   $\text{cm}^{-1}$ : 1854 (C=O), 1624, 1528, 932, 864; HRMS (APCI<sup>+</sup>)  $\text{C}_{21}\text{H}_{16}\text{NF}_9\text{O}_2\text{Br}^+$   $[\text{M}+\text{H}]^+$  found 564.0221, requires 564.0215 (-1.1 ppm).

### (3*S*,4*S*)-4-(4-Bromophenyl)-3-(4-methoxyphenyl)-4-(perfluorobutyl)oxetan-2-one **37**

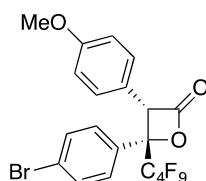

Following General Procedure C, ketone **18** (101 mg, 0.25 mmol), anhydride **S2** (194 mg, 0.625 mmol), HyperBTM (4 mg, 0.0125 mmol) and *i*-Pr<sub>2</sub>NEt (54  $\mu\text{L}$ , 0.31 mmol) in  $\text{CH}_2\text{Cl}_2$  gave, after Biotage

chromatography (0→2% Et<sub>2</sub>O in hexane), (3*S*,4*S*)-4-(4-bromophenyl)-3-(4-methoxyphenyl)-4-(perfluorobutyl)oxetan-2-one **37** as a colourless oil (111 mg, 81%) as an inseparable mixture of diastereoisomers (> 95:5 dr).

$[\alpha]_D^{20} = +127.0$  (*c* 1.0, CHCl<sub>3</sub>); **Chiral HPLC analysis**, Chiralcel OD-H (97:3 hexane:IPA, flow rate 1.5 mLmin<sup>-1</sup>, 211 nm, 40 °C), *t*<sub>R</sub>(3*R*,4*R*): 3.3 min, *t*<sub>R</sub>(3*S*,4*S*): 3.8 min, 97:3 er; **<sup>1</sup>H NMR** (500 MHz, CDCl<sub>3</sub>) δ<sub>H</sub>: 3.75 (3H, s, OCH<sub>3</sub>), 5.56 (1H, s, C(3)*H*), 6.66–6.74 (2H, m, C(3)ArC(3,5)*H*), 6.74–6.82 (2H, m, C(3)ArC(2,6)*H*), 6.88–7.02 (2H, m, C(4)ArC(2,6)*H*), 7.32–7.41 (2H, m, C(4)ArC(3,5)*H*); **<sup>13</sup>C{<sup>1</sup>H} NMR** (126 MHz, CDCl<sub>3</sub>) δ<sub>C</sub>: 55.4 (OCH<sub>3</sub>), 64.0 (C(3)*H*), 81.1 (dd, <sup>2</sup>*J*<sub>CF</sub> 31.3, 23.6, C(4)), 105.9–119.9 (CF<sub>2</sub>CF<sub>2</sub>CF<sub>2</sub>CF<sub>3</sub>), 114.5 (C(3)ArC(3,5)*H*), 119.9 (C(3)ArC(1)), 124.3 (C(4)ArC(1)), 127.9 (C(4)ArC(4)), 129.3 (C(4)ArC(2,6)*H*), 131.1 (C(3)ArC(2,6)*H*), 131.5 (C(4)ArC(3,5)*H*), 160.3 (C(3)ArC(4)), 166.5 (C(2)); **<sup>19</sup>F NMR** (471 MHz, CDCl<sub>3</sub>) δ<sub>F</sub>: -128.7 – -124.3 (m, CF<sub>2</sub>), -122.9 – -121.5 (m, CF<sub>2</sub>), -118.8 – -115.9 (m, CF<sub>2</sub>), -80.8 (t, *J* 9.9, CF<sub>3</sub>). **IR** (neat) ν<sub>max</sub> cm<sup>-1</sup>: 1854 (CO).

#### (3*S*,4*S*)-4-(4-Bromophenyl)-3-(4-fluorophenyl)-4-(perfluorobutyl)oxetan-2-one **38**

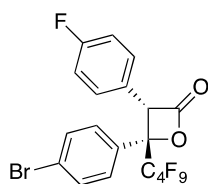

Following General Procedure C, ketone **18** (101 mg, 0.25 mmol), anhydride **S3** (180 mg, 0.625 mmol), HyperBTM (4 mg, 0.0125 mmol) and *i*-Pr<sub>2</sub>NEt (54 μL, 0.31 mmol) in CH<sub>2</sub>Cl<sub>2</sub> gave, after Biotage chromatography (0→2% Et<sub>2</sub>O in hexane), (3*S*,4*S*)-4-(4-bromophenyl)-3-(4-fluorophenyl)-4-(perfluorobutyl)oxetan-2-one **38** as a colourless oil (96 mg, 71%) as an inseparable mixture of diastereoisomers (> 95:5 dr).

$[\alpha]_D^{20} = +102.0$  (*c* 1.0, CHCl<sub>3</sub>); **Chiral HPLC analysis**, Chiralcel OD-H (97:3 hexane:IPA, flow rate 1.5 mLmin<sup>-1</sup>, 211 nm, 40 °C), *t*<sub>R</sub>(3*R*,4*R*): 2.8 min, *t*<sub>R</sub>(3*S*,4*S*): 3.1 min, 96:4 er; **<sup>1</sup>H NMR** (500 MHz, CDCl<sub>3</sub>) δ<sub>H</sub>: 5.60 (1H, s, C(3)*H*), 6.82–6.88 (2H, m, C(3)ArC(2,6)*H*), 6.89–7.00 (4H, m, C(3)ArC(3,5)*H* + C(4)Ar(2,6)*H*), 7.33–7.40 (2H, m, C(4)ArC(3,5)*H*); **<sup>13</sup>C{<sup>1</sup>H} NMR** (126 MHz, CDCl<sub>3</sub>) δ<sub>C</sub>: 63.8 (C(3)*H*), 81.0 (dd, <sup>2</sup>*J*<sub>CF</sub> 31.4, 23.5, C(4)), 105.6–121.3 (CF<sub>2</sub>CF<sub>2</sub>CF<sub>2</sub>CF<sub>3</sub>), 116.4 (d, <sup>2</sup>*J*<sub>CF</sub> 22.2, C(3)ArC(3,5)*H*), 124.0 (d, <sup>3</sup>*J*<sub>CF</sub> 3.3, C(3)ArC(2,6)*H*), 124.5 (C(4)ArC(1)), 127.5 (C(4)ArC(4)), 129.1 (C(4)ArC(2,6)*H*), 131.5 (C(4)ArC(3,5)*H*), 132.5 (C(3)ArC(1)), 163.2 (d, <sup>1</sup>*J*<sub>CF</sub> 250.5, C(3)ArC(4)), 165.8 (C(2)); **<sup>19</sup>F NMR** (471 MHz, CDCl<sub>3</sub>) δ<sub>F</sub>: -127.9 – -124.5 (m, CF<sub>2</sub>), -122.8 – -121.4 (m, CF<sub>2</sub>), -118.3 – -116.0 (m, CF<sub>2</sub>), -110.6 (m, ArF) -80.9 – -80.8 (m, CF<sub>3</sub>); **IR** (neat) ν<sub>max</sub> cm<sup>-1</sup>: 1856 (CO); **HRMS** (APCI<sup>+</sup>) C<sub>19</sub>H<sub>10</sub>BrF<sub>10</sub>O<sub>2</sub><sup>+</sup> [M+H]<sup>+</sup> found 538.9716 requires 538.9699 (+3.2 ppm).

### (3*S*,4*S*)-3,4-Bis(4-bromophenyl)-4-(perfluorobutyl)oxetan-2-one **39**

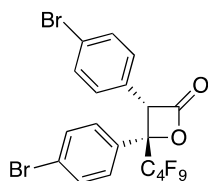

Following General Procedure C, ketone **18** (101 mg, 0.25 mmol), anhydride **S4** (255 mg, 0.625 mmol), HyperBTM (4 mg, 0.0125 mmol) and *i*-Pr<sub>2</sub>NEt (54 μL, 0.31 mmol) in CH<sub>2</sub>Cl<sub>2</sub> gave, after Biotage chromatography (0→2% Et<sub>2</sub>O in hexane), (3*S*,4*S*)-3,4-bis(4-bromophenyl)-4-(perfluorobutyl)oxetan-2-one **39** as a colourless oil (82 mg, 55%), as an inseparable mixture of diastereoisomers (> 95:5 dr).

$[\alpha]_D^{20} = +115.0$  (*c* 1.0, CHCl<sub>3</sub>); **Chiral HPLC analysis**, Chiralpak AD-H (99:1 hexane:IPA, flow rate 1.5 mLmin<sup>-1</sup>, 211 nm, 40 °C) *t*<sub>R</sub>(3*S*,4*S*): 3.6 min, *t*<sub>R</sub>(3*R*,4*R*): 4.1 min, 95:5 er; **<sup>1</sup>H NMR** (500 MHz, CDCl<sub>3</sub>) δ<sub>H</sub>: 5.56 (1H, s, C(3)*H*), 6.72–6.78 (2H, m, C(3)ArC(2,6)*H*), 6.92–7.01 (2H, m, C(4)ArC(2,6)*H*), 7.33–7.42 (4H, m, C(3)ArC(3,5)*H* + C(4)ArC(3,5)*H*); **<sup>13</sup>C{<sup>1</sup>H} NMR** (126 MHz, CDCl<sub>3</sub>) δ<sub>C</sub>: 63.9 (C(3)*H*), 80.8 (dd, <sup>2</sup>*J*<sub>CF</sub> 31.6, 23.4, C(4)), 105.2–120.0 (CF<sub>2</sub>CF<sub>2</sub>CF<sub>2</sub>CF<sub>3</sub>), 124.1 (C(3)ArC(1)), 124.7 (C(4)ArC(1)), 127.0 (C(3)ArC(4)), 127.4 (C(4)ArC(4)), 129.1 (C(4)ArC(2,6)*H*), 131.3 (C(3)ArC(2,6)*H*), 131.8 (C(3)ArC(3,5)*H*), 132.4 (C(4)ArC(3,5)*H*), 165.3 (C(2)); **<sup>19</sup>F NMR** (471 MHz, CDCl<sub>3</sub>) δ<sub>F</sub>: -128.0 – -124.4 (m, CF<sub>2</sub>), -122.9 – -121.5 (m, CF<sub>2</sub>), -118.4 – -115.9 (m, CF<sub>2</sub>), -80.8 – -80.8 (m, CF<sub>3</sub>); **IR** (neat) ν<sub>max</sub> cm<sup>-1</sup>: 1711 (CO); **HRMS** (ESI<sup>-</sup>) C<sub>19</sub>H<sub>8</sub>Br<sub>2</sub>F<sub>9</sub>O<sub>2</sub><sup>-</sup> [M-H]<sup>-</sup> found 596.8759, requires 596.8753 (+1.0 ppm).

### (3*S*,4*S*)-4-(4-Bromophenyl)-4-(perfluorobutyl)-3-(4-(trifluoromethyl)phenyl)oxetan-2-one **40**

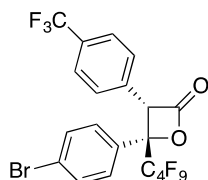

Following General Procedure C, ketone **18** (101 mg, 0.25 mmol), anhydride **S5** (242 mg, 0.625 mmol), HyperBTM (4 mg, 0.0125 mmol) and *i*-Pr<sub>2</sub>NEt (54 μL, 0.31 mmol) in CH<sub>2</sub>Cl<sub>2</sub> gave, after Biotage chromatography (0→2% Et<sub>2</sub>O in hexane), (3*S*,4*S*)-4-(4-bromophenyl)-4-(perfluorobutyl)-3-(4-(trifluoromethyl)phenyl)oxetan-2-one **40** as a colourless oil (18 mg, 12%) as an inseparable mixture of diastereoisomers (> 95:5 dr).

$[\alpha]_D^{20} = +53.0$  (*c* 1.0, CHCl<sub>3</sub>); **Chiral HPLC analysis**, Chiralpak AD-H (99:1 hexane:IPA, flow rate 1.5 mLmin<sup>-1</sup>, 211 nm, 40 °C) *t*<sub>R</sub>(3*S*,4*S*): 3.2 min, *t*<sub>R</sub>(3*R*,4*R*): 4.0 min, 95:5 er; **<sup>1</sup>H NMR** (500 MHz, CDCl<sub>3</sub>) δ<sub>H</sub>: 5.66 (1H, s, C(3)*H*), 6.90–6.99 (2H, m, C(4)ArC(2,6)*H*), 7.00–7.06 (2H, m, C(3)ArC(2,6)*H*), 7.33–7.41 (2H, m, C(4)ArC(3,5)*H*), 7.47–7.53 (2H, m, C(3)ArC(3,5)*H*); **Minor diastereoisomer (selected signals)** δ<sub>H</sub>: 5.30 (1H, s, C(3)*H*); **<sup>13</sup>C{<sup>1</sup>H} NMR** (126 MHz, CDCl<sub>3</sub>) δ<sub>C</sub>: 63.9 (d, <sup>3</sup>*J*<sub>CF</sub> 4.7, C(3)*H*), 80.9 (dd, <sup>2</sup>*J*<sub>CF</sub> 31.1, 24.0, C(4)), 106.2–121.3 (CF<sub>2</sub>CF<sub>2</sub>CF<sub>2</sub>CF<sub>3</sub>), 123.6 (q, *J* 272.5, ArCF<sub>3</sub>), 124.8 (C(4)ArC(4)), 126.1 (q, <sup>3</sup>*J*<sub>CF</sub> 3.7,

C(3)ArC(3,5)H), 127.2 (d,  $^3J_{CF}$  2.9, C(4)CAr(1)), 129.0 (C(4)ArC(2,6)H), 130.3 (C(3)ArC(2,6)H), 131.8 (C(4)ArC(3,5)H), 131.8 (q,  $^2J_{CF}$  33.3, C(3)ArC(4)), 132.0 (C(3)CAr(1)), 164.9 (C(2));  $^{19}\text{F}$  NMR (471 MHz,  $\text{CDCl}_3$ )  $\delta_{\text{F}}$ : -127.9 – -124.5 (m,  $\text{CF}_2$ ), -122.9 – -121.2 (m,  $\text{CF}_2$ ), -118.3 – -115.8 (m,  $\text{CF}_2$ ), -80.9 – -80.7 (m,  $\text{CF}_3$ ), -63.0 (Ar $\text{CF}_3$ ); *Minor diastereoisomer (selected signals)*  $\delta_{\text{F}}$ : -80.9 – -80.9 (m,  $\text{CF}_3$ ), -62.9 (Ar $\text{CF}_3$ ); IR (neat)  $\nu_{\text{max}}$   $\text{cm}^{-1}$ : 1857 (CO); HRMS (ESI $^-$ )  $\text{C}_{20}\text{H}_8\text{BrF}_{12}\text{O}_2^-$  [M-H] $^-$  found 586.9527, requires 586.9522 (+0.9 ppm).

**(3S,4S)-4-(4-Bromophenyl)-4-(perfluorobutyl)-3-(*m*-tolyl)oxetan-2-one **41****

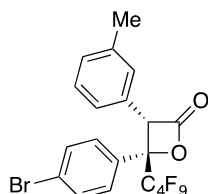

Following General Procedure C, ketone **18** (101 mg, 0.25 mmol), anhydride **S6** (175 mg, 0.625 mmol), HyperBTM (4 mg, 0.0125 mmol) and *i*-Pr $_2$ NEt (54  $\mu\text{L}$ , 0.31 mmol) in  $\text{CH}_2\text{Cl}_2$  gave, after Biotage chromatography (0 $\rightarrow$ 2% Et $_2$ O in hexane), (3S,4S)-4-(4-bromophenyl)-4-(perfluorobutyl)-3-(*m*-tolyl)oxetan-2-one **41** as a yellow oil (112 mg, 84%) as an inseparable mixture of diastereoisomers (> 95:5 dr).

$[\alpha]_{\text{D}}^{20} = +122.0$  (c 1.0,  $\text{CHCl}_3$ ); **Chiral HPLC analysis**, Chiralcel OD-H (97:3 hexane:IPA, flow rate 1.5  $\text{mLmin}^{-1}$ , 211 nm, 40  $^\circ\text{C}$ ),  $t_{\text{R}}$ (3R,4R): 2.6 min,  $t_{\text{R}}$ (3S,4S): 3.3 min, 97:3 er;  $^1\text{H}$  NMR (500 MHz,  $\text{CDCl}_3$ )  $\delta_{\text{H}}$ : 2.20 (3H, s,  $\text{CH}_3$ ), 5.56 (1H, s, C(3)H), 6.63–6.68 (2H, m, C(3)Ar(2,6)H), 6.90–7.01 (2H, m, C(4)ArC(2,6)H), 7.04–7.11 (2H, m, C(3)ArC(4,5)H), 7.30–7.37 (2H, m, C(4)ArC(3,5)H); *Minor diastereoisomer (selected signals)*  $\delta_{\text{H}}$ : 2.41 (3H, s,  $\text{CH}_3$ ), 5.23 (1H, s, C(3)H);  $^{13}\text{C}\{^1\text{H}\}$  NMR (126 MHz,  $\text{CDCl}_3$ )  $\delta_{\text{C}}$ : 21.3 ( $\text{CH}_3$ ), 64.6 (C(3)H), 81.0 (dd,  $^2J_{CF}$  31.3, 23.6, C(4)), 105.5–121.2 ( $\text{CF}_2\text{CF}_2\text{CF}_2\text{CF}_3$ ), 124.2 (C(4)ArC(1)), 126.8 (C(3)ArC(6)H), 127.9 (C(3)ArC(4)), 127.9 (C(4)ArC(4)), 129.0 (C(3)ArC(5)H), 129.2 (C(4)ArC(2,6)H), 130.3 (C(3)ArC(4)H), 130.4 (C(3)ArC(2)H), 131.4 (C(4)ArC(3,5)H), 138.9 (C(3)ArC(3)), 166.1 (C(2));  $^{19}\text{F}$  NMR (471 MHz,  $\text{CDCl}_3$ )  $\delta_{\text{F}}$ : -128.0 – -124.6 (m,  $\text{CF}_2$ ), -122.9 – -121.3 (m,  $\text{CF}_2$ ), -118.4 – -116.0 (m,  $\text{CF}_2$ ), -80.9 – -80.8 (m,  $\text{CF}_3$ ); IR (neat)  $\nu_{\text{max}}$   $\text{cm}^{-1}$ : 1856 (CO); HRMS (APCI $^+$ )  $\text{C}_{20}\text{H}_{13}\text{BrF}_9\text{O}_2^+$  [M+H] $^+$  found 534.9959, required 534.9950 (+1.7 ppm).

**(3S,4S)-4-(4-Bromophenyl)-4-(perfluorobutyl)-3-(*o*-tolyl)oxetan-2-one **42****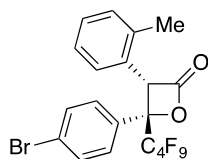

Following General Procedure C, ketone **18** (101 mg, 0.25 mmol), anhydride **S7** (175 mg, 0.625 mmol), HyperBTM (4 mg, 0.0125 mmol) and *i*-Pr<sub>2</sub>NEt (54  $\mu$ L, 0.31 mmol) in CH<sub>2</sub>Cl<sub>2</sub> gave, after Biotage chromatography (0 $\rightarrow$ 2% Et<sub>2</sub>O in hexane), (3S,4S)-4-(4-bromophenyl)-4-(perfluorobutyl)-3(*o*-tolyl)oxetan-2-one **42** as a colourless oil (105 mg, 79%) as an inseparable mixture of diastereoisomers (> 95:5 dr).

$[\alpha]_D^{20} = +176.0$  (*c* 1.0, CHCl<sub>3</sub>); **Chiral HPLC analysis**, Chiralcel OD-H (97:3 hexane:IPA, flow rate 1.5 mLmin<sup>-1</sup>, 211 nm, 40 °C), *t*<sub>R</sub>(3*R*,4*R*): 2.8 min, *t*<sub>R</sub>(3*S*,4*S*): 3.8 min, 99:1 er; **<sup>1</sup>H NMR** (500 MHz, CDCl<sub>3</sub>)  $\delta$ <sub>H</sub>: 2.39 (3H, s, CH<sub>3</sub>), 5.80 (1H, s, C(6)*H*), 6.3–7.6 (2H, very broad, C(4)ArC(2,6)*H*), 6.46–6.52 (1H, m, C(3)ArC(6)*H*), 6.86–6.92 (1H, C(3)Ar(5)*H*), 7.12–7.19 (2H, m, C(3)ArC(3,4)*H*), 7.21–7.43 (2H, br, C(4)ArC(3,5)*H*); **<sup>13</sup>C{<sup>1</sup>H} NMR** (126 MHz, CDCl<sub>3</sub>)  $\delta$ <sub>C</sub>: 19.6 (CH<sub>3</sub>), 61.5 (d, <sup>3</sup>*J*<sub>CF</sub> 4.6, C(3)H), 81.4 (dd, <sup>2</sup>*J*<sub>CF</sub> 32.4, 23.8, C(4)), 105.5–121.3 (CF<sub>2</sub>CF<sub>2</sub>CF<sub>2</sub>CF<sub>3</sub>), 124.3 (C(4)ArC(1)), 126.6 (C(3)ArC(1)), 126.7 (C(3)ArC(5)H), 128.0 (C(4)ArC(4)), 128.9 (C(4)ArC(2,6)H), 129.7 (C(3)ArC(5)H), 130.2 (C(3)ArC(6)H), 131.0 (C(3)ArC(3)H), 131.5 (C(4)ArC(3,5)H), 136.9 (C(3)ArC(2)), 166.8 (C(2)); **<sup>19</sup>F** (471 MHz, CDCl<sub>3</sub>)  $\delta$ <sub>F</sub>: -128.1 – -124.3 (m, CF<sub>2</sub>), -123.0 – -121.6 (m, CF<sub>2</sub>), -118.1 – -114.2 (m, CF<sub>2</sub>), -80.9 – -80.8 (m, CF<sub>3</sub>); **IR** (neat)  $\nu_{\max}$  cm<sup>-1</sup>: 1857 (CO); **HRMS** (APCI<sup>+</sup>) C<sub>20</sub>H<sub>13</sub>BrF<sub>9</sub>O<sub>2</sub><sup>+</sup> [M+H]<sup>+</sup> found 534.9951, required 534.9950 (+0.2 ppm).

**(3S,4S)-4-(4-Bromophenyl)-4-(perfluorobutyl)-3-(thiophen-3-yl)oxetan-2-one **43****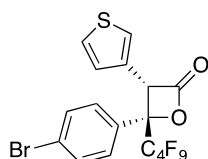

Following General Procedure C, ketone **18** (101 mg, 0.25 mmol), anhydride **S8** (165 mg, 0.625 mmol), HyperBTM (4 mg, 0.0125 mmol) and *i*-Pr<sub>2</sub>NEt (54  $\mu$ L, 0.31 mmol) in CH<sub>2</sub>Cl<sub>2</sub> gave, after Biotage chromatography (0 $\rightarrow$ 2% Et<sub>2</sub>O in hexane), (3S,4S)-4-(4-bromophenyl)-4-(perfluorobutyl)-3-(thiophen-3-yl)oxetan-2-one **43** as a colourless oil (114 mg, 87%) as an inseparable mixture of diastereoisomers (> 95:5 dr).

$[\alpha]_D^{20} = +94.0$  (*c* 1.0, CHCl<sub>3</sub>); **Chiral HPLC analysis**, Chiralcel OD-H (97:3 hexane:IPA, flow rate 1.5 mLmin<sup>-1</sup>, 211 nm, 40 °C), *t*<sub>R</sub>(3*R*,4*R*): 3.1 min, *t*<sub>R</sub>(3*S*,4*S*): 3.8 min, 94:6 er; **<sup>1</sup>H NMR** (500 MHz, CDCl<sub>3</sub>)  $\delta$ <sub>H</sub>: 5.68 (1H, s, C(3)H), 6.48 (1H, dd, *J* 5.1, 1.3, C(3)ArC(4)H), 6.95–7.06 (3H, m, C(3)ArC(2)H + C(4)ArC(2,6)H), 7.18 (1H, dd, *J* 5.1, 2.9, C(3)ArC(5)H), 7.35–7.41 (2H, m, C(4)ArC(3,5)H); **<sup>13</sup>C{<sup>1</sup>H} NMR**

(126 MHz, CDCl<sub>3</sub>)  $\delta_C$ : 59.5 (C(3)), 80.8 (dd, *J* 31.5, 23.8, C(4)), 104.5–121.5 (CF<sub>2</sub>CF<sub>2</sub>CF<sub>2</sub>CF<sub>3</sub>), 124.5 (C(4)ArC(1)), 127.0 (C(3)ArC(2)H), 127.38 (C(3)ArC(5)H), 127.40 (C(3)ArC(4)), 127.8 (C(3)ArC(3)), 127.9 (C(4)ArC(4)), 128.9 (C(4)ArC(2,6)H), 131.6 (C(4)ArC(3,5)H), 165.8 (C(2)); <sup>19</sup>F NMR (471 MHz, CDCl<sub>3</sub>)  $\delta_F$ : -128.3 – -124.0 (m, CF<sub>2</sub>), -123.3 – -121.2 (m, CF<sub>2</sub>), -118.7 – -116.0 (m, CF<sub>2</sub>), -80.9 – -80.8 (m, CF<sub>3</sub>); IR (neat)  $\nu_{\max}$  cm<sup>-1</sup>: 1854 (CO); HRMS (APCI+) C<sub>17</sub>H<sub>9</sub>BrF<sub>9</sub>O<sub>2</sub>S [M+H]<sup>+</sup> found 526.9360 requires 526.9357 (+0.6 ppm).

**(3*S*,4*S*)-4-(4-Bromophenyl)-3-(1-methyl-1*H*-indol-3-yl)-4-(perfluorobutyl)oxetan-2-one 44**

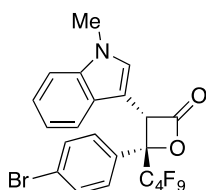

Following General Procedure C, ketone **18** (101 mg, 0.25 mmol), anhydride **S9** (223 mg, 0.625 mmol), HyperBTM (4 mg, 0.0125 mmol) and *i*-Pr<sub>2</sub>NEt (54  $\mu$ L, 0.31 mmol) in CH<sub>2</sub>Cl<sub>2</sub> gave, after Biotage chromatography (0→2% Et<sub>2</sub>O in hexane), (3*S*,4*S*)-4-(4-bromophenyl)-3-(1-methyl-1*H*-indol-3-yl)-4-(perfluorobutyl)oxetan-2-one **44** as a colourless solid (79 mg, 55%) as an inseparable mixture of diastereoisomers (> 95:5 dr).

**m.p.** 112–114 °C;  $[\alpha]_D^{20} = +126.0$  (*c* 0.5, CHCl<sub>3</sub>); **Chiral HPLC analysis**, Chiralpak AS-H (99:1 hexane:IPA, flow rate 1.5 mLmin<sup>-1</sup>, 211 nm, 40 °C), *t*<sub>R</sub>(3*R*,4*R*): 3.9 min, *t*<sub>R</sub>(3*S*,4*S*): 5.2 min, 99:1 er; <sup>1</sup>H NMR (500 MHz, CDCl<sub>3</sub>)  $\delta_H$ : 3.64 (3H, s, CH<sub>3</sub>), 5.90 (1H, s, C(3)H), 6.60 (1H, s, C(3)ArC(2)H), 6.98 (2H, br, C(4)ArC(2,6)H), 7.12–7.17 (1H, m, C(3)ArC(5)H), 7.20–7.30 (4H, m, C(3)ArC(6,7)H + C(4)ArC(3,5)H), 7.39 (1H, d, *J* 8.2, C(3)ArC(4)H); <sup>13</sup>C{<sup>1</sup>H} NMR (126 MHz, CDCl<sub>3</sub>)  $\delta_C$ : 33.2 (CH<sub>3</sub>), 56.7 (C(3)H), 81.7 (dd, *J* 31.8, 23.5, C(4)), 101.1 (C(3)ArC(3)), 110.0 (C(3)ArC(6)H), 117.9 (C(3)ArC(4)H), 120.6 (C(3)ArC(5)H), 122.7 (C(3)ArC(7)H), 124.1 (C(4)ArC(1)), 126.8 (C(3)CAr(3a)), 128.4 (C(4)ArC(4)), 129.1 (C(4)ArC(2,6)H), 129.6 (C(3)ArC(2)H), 131.3 (C(4)ArC(3,5)H), 136.9 (C(3)ArC(7a)), 167.5 (C(2)), C<sub>4</sub>F<sub>9</sub> not observed; <sup>19</sup>F NMR (471 MHz, CDCl<sub>3</sub>)  $\delta_F$ : -128.0 – -124.4 (m, CF<sub>2</sub>), -122.9 – -121.8 (m, CF<sub>2</sub>), -118.4 – -115.6 (m, CF<sub>2</sub>), -80.9 – -80.7 (m, CF<sub>3</sub>); IR (neat)  $\nu_{\max}$  cm<sup>-1</sup>: 1852 (CO); HRMS (APCI+) C<sub>22</sub>H<sub>14</sub>NBrF<sub>9</sub>O<sub>2</sub><sup>+</sup> [M+H]<sup>+</sup> found 574.0078, required 574.0059 (+3.3 ppm).

**(3*S*,4*S*)-4-(4-Bromophenyl)-4-(perfluorobutyl)-3-((*E*)-prop-1-en-1-yl)oxetan-2-one 45**

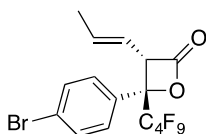

Following General Procedure C, ketone **18** (101 mg, 0.25 mmol), anhydride **S10** (115 mg, 0.625 mmol), HyperBTM (4 mg, 0.0125 mmol) and *i*-Pr<sub>2</sub>NEt (54  $\mu$ L, 0.31 mmol) in CH<sub>2</sub>Cl<sub>2</sub> gave, after Biotage

chromatography (0→2% Et<sub>2</sub>O in hexane), (3*S*,4*S*)-4-(4-bromophenyl)-4-(perfluorobutyl)-3-((*E*)-prop-1-en-1-yl)oxetan-2-one **45** as a colourless oil (101 mg, 83%) as an inseparable mixture of diastereoisomers (83:17 dr).

$[\alpha]_D^{20} = +11.0$  (c 1.0, CHCl<sub>3</sub>); **Chiral HPLC analysis**, Inseparable by HPLC, er obtained following ring opening with benzylamine (see below); **<sup>1</sup>H NMR** (500 MHz, CDCl<sub>3</sub>)  $\delta_H$ : 1.66 (3H, dd, *J* 6.6, 1.3, CH<sub>3</sub>), 4.84–4.94 (2H, m, C(3)*H* + CH=CHCH<sub>3</sub>), 5.80–5.90 (1H, m, CH=CHCH<sub>3</sub>), 7.22–7.28 (2H, m, C(4)ArC(2,6)*H*), 7.56–7.62 (2H, m, C(4)ArC(3,5)*H*); *Minor diastereoisomer (selected signals)*  $\delta_H$ : 1.84 (3H, dd, *J* 6.3, 1.4, CH<sub>3</sub>), 4.51 (1H, d, *J* 8.7, C(3)*H*), 5.96 (1H, dq, *J* 15.2, 6.3, CH=CHCH<sub>3</sub>), 7.32–7.37 (2H, m, C(4)ArC(2,6)*H*); **<sup>13</sup>C{<sup>1</sup>H} NMR** (126 MHz, CDCl<sub>3</sub>)  $\delta_C$ : 18.2 (CH<sub>3</sub>), 61.8 (C(3)*H*), 79.8 (dd, <sup>2</sup>*J*<sub>CF</sub> 30.6, 23.4, C(4)), 105.3–121.6 (CF<sub>2</sub>CF<sub>2</sub>CF<sub>2</sub>CF<sub>3</sub>), 118.0 (CH=CHCH<sub>3</sub>), 124.6 (C(4)ArC(4)), 128.2 (C(4)ArC(1)), 129.1 (C(4)ArC(2,6)*H*), 131.9 (C(4)ArC(3,5)*H*), 136.9 (CH=CHCH<sub>3</sub>), 166.1 (C(2)); *Minor diastereoisomer (selected signals)*  $\delta_C$ : 18.3 (CH<sub>3</sub>), 68.6 (C(3)*H*), 124.5 (C(4)ArC(4)), 132.2 (C(4)ArC(3,5)*H*), 137.0 (CH=CHCH<sub>3</sub>), 166.0 (C(2)); **<sup>19</sup>F NMR** (471 MHz, CDCl<sub>3</sub>)  $\delta_F$ : -128.1 – -124.6 (m, CF<sub>2</sub>), -123.0 – -121.7 (m, CF<sub>2</sub>), -118.5 – -116.3 (m, CF<sub>2</sub>), -81.0 – -80.8 (m, CF<sub>3</sub>); **IR** (neat)  $\nu_{max}$  cm<sup>-1</sup>: 1852 (CO); **HRMS** (APCI<sup>+</sup>) C<sub>16</sub>H<sub>11</sub>BrF<sub>9</sub>O<sub>2</sub><sup>+</sup> [M+H]<sup>+</sup> found 484.9798, required 484.9793 (+1.0 ppm).

**(2*S*,3*S*)-*N*-Benzyl-3-(4-bromophenyl)-4,4,5,5,6,6,7,7,7-nonafluoro-3-hydroxy-2-((*E*)-prop-1-en-1-yl)heptanamide **S19****

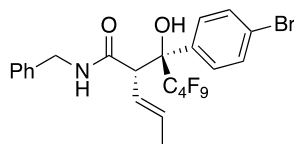

Benzylamine (50  $\mu$ L, 0.5 mmol, 5.00 equiv.) was added to a solution of (3*S*,4*S*)-4-(4-bromophenyl)-4-(perfluorobutyl)-3-((*E*)-prop-1-en-1-yl)oxetan-2-one **45** (50 mg, 0.1 mmol, 1.00 equiv.) in CH<sub>2</sub>Cl<sub>2</sub> (0.1 M) and allowed to stir at r.t. for 16 h. The mixture was diluted with CH<sub>2</sub>Cl<sub>2</sub> and washed with 0.1 M HCl (3  $\times$  10 mL) to give (2*S*,3*S*)-*N*-benzyl-3-(4-bromophenyl)-4,4,5,5,6,6,7,7,7-nonafluoro-3-hydroxy-2-((*E*)-prop-1-en-1-yl)heptanamide **S19** as a 90:10 mixture of diastereoisomers as a colourless crystalline solid (47 mg, 78%).

**m.p.** 96-98  $^{\circ}$ C;  $[\alpha]_D^{20} = +12.0$  (c 1.0, CHCl<sub>3</sub>); **Chiral HPLC analysis**, Chiralpak AD-H (98:2 hexane:IPA, flow rate 1.5 mLmin<sup>-1</sup>, 254 nm, 40  $^{\circ}$ C), *t*<sub>R</sub>(3*R*,4*R*): 9.9 min, *t*<sub>R</sub>(3*S*,4*S*): 13.2 min, 86:14 er; **<sup>1</sup>H NMR** (500 MHz, CDCl<sub>3</sub>)  $\delta_H$ : 1.44 (3H, dd, *J* 6.4, 1.6, CH<sub>3</sub>), 3.40 (1H, dd, *J* 9.0, 2.3, C(2)*H*), 4.45 (1H, dd, *J* 14.8, 5.7, NHCH<sup>A</sup>H<sup>B</sup>), 4.51 (1H, dd, *J* 14.8, 5.7, NHCH<sup>A</sup>H<sup>B</sup>), 5.18–5.26 (1H, m, CH=CHCH<sub>3</sub>), 5.37 (1H, dq, *J* 15.4, 6.4, CH=CHCH<sub>3</sub>), 6.11 (1H, app t, *J* 5.7, NH), 7.22–7.26 (2H, m, NHCH<sub>2</sub>ArC(2,6)*H*), 7.29–7.38 (5H, m, NHCH<sub>2</sub>ArC(3,4,5)*H* & C(3)ArC(2,6)*H*), 7.44–7.49 (2H, m, C(3)ArC(3,5)*H*); *Minor diastereoisomer (selected signals)*  $\delta_H$ : 1.78 (3H, d, *J* 6.6, CH<sub>3</sub>), 3.57–3.62 (1H, m, C(2)*H*); **<sup>13</sup>C{<sup>1</sup>H} NMR** (126 MHz, CDCl<sub>3</sub>)

$\delta_C$ : 18.0 ( $CH_3$ ), 43.9 ( $CH_2$ ), 51.5 ( $C(2)H$ ), 79.8 (t,  $J$  22.3,  $C(3)$ ), 105.7–120.1 ( $CF_2CF_2CF_2CF_3$ ), 122.6 ( $C(3)ArC(4)Br$ ), 123.3 ( $CH=CHCH_3$ ), 127.9 ( $NHCH_2ArC(2,6)H$ ), 128.1 ( $NHCH_2ArC(4)H$ ), 128.5 ( $C(3)ArC(2,6)H$ ), 129.0 ( $NCH_2ArC(3,5)H$ ), 131.3 ( $C(3)ArC(3,5)H$ ), 132.4 ( $CH=CHCH_3$ ), 135.0 ( $C(3)ArC(1)$ ), 137.0 ( $NHCH_2ArC(1)$ ), 173.6 ( $C=O$ ); *Minor diastereoisomer (selected signals)*  $\delta_C$ : 18.2 ( $CH_3$ ), 43.3 ( $CH_2$ ), 56.1 ( $C(2)H$ ), 172.3 ( $C=O$ );  $^{19}F\{^1H\}$  NMR (471 MHz,  $CDCl_3$ )  $\delta_F$ : -127.6 – -124.6 (m,  $CF_2$ ), -120.9 – -117.4 (m,  $CF_2$ ), -115.9 – -113.2 (m,  $CF_2$ ), -80.9 – -80.8 (m,  $CF_3$ ); IR (neat)  $\nu_{max}$   $cm^{-1}$ : 3291 (OH), 2918 (CH), 1626 (C=O), 1454, 1354, 1233, 1198, 1134, 1076, 1011, 964.

**(3*S*,4*S*)-4-(4-Bromophenyl)-4-(perfluorobutyl)-3-(phenylthio)oxetan-2-one 46**

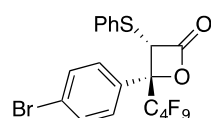

Following General Procedure C, ketone **18** (101 mg, 0.25 mmol), anhydride **S11** (199 mg, 0.625 mmol), HyperBTM (4 mg, 0.0125 mmol) and *i*-Pr<sub>2</sub>NEt (54  $\mu$ L, 0.31 mmol) in  $CH_2Cl_2$  gave, after Biotage chromatography (0→5% Et<sub>2</sub>O in hexane), (3*S*,4*S*)-4-(4-bromophenyl)-4-(perfluorobutyl)-3-(phenylthio)oxetan-2-one **46** as a colourless oil (49 mg, 35%) as an inseparable mixture of diastereoisomers (> 95:5 dr).

$[\alpha]_D^{20} = -55.2$  (c 0.5,  $CHCl_3$ ); **Chiral HPLC analysis**, Chiralcel OD-H (99.5:0.5 Hexane:IPA, flow rate 1.5 mLmin<sup>-1</sup>, 211 nm, 40 °C)  $t_R(3R,4R)$ : 3.9 min,  $t_R(3S,4S)$ : 4.4 min, 83:17 er;  $^1H$  NMR (500 MHz,  $CDCl_3$ )  $\delta_H$ : 5.44 (1H, s,  $C(3)H$ ), 7.21–7.26 (4H, m, PhC(2,3,5,6)H), 7.27–7.34 (3H, m,  $C(4)ArC(2,6)H$  + PhC(4)H), 7.56–7.60 (2H, m,  $C(4)ArC(3,5)H$ ); *Minor diastereoisomer (selected signals)*  $\delta_H$ : 5.02 (1H, s,  $C(3)H$ );  $^{13}C\{^1H\}$  NMR (126 MHz,  $CDCl_3$ )  $\delta_C$ : 62.6 (d,  $J$  4.4,  $C(3)H$ ), 80.8 (dd,  $J$  31.0, 23.8,  $C(4)$ ), 105.7–121.2 (m,  $CF_2CF_2CF_2CF_3$ ), 125.2 ( $C(4)ArC(4)$ ), 127.0 ( $C(4)ArC(1)$ ), 129.1 ( $C(4)ArC(2,6)H$ ), 129.2 (PhC(4)H), 129.5 (PhC(3,5)H), 130.1 (PhC(1)), 131.8 ( $C(4)ArC(3,5)H$ ), 133.2 (PhC(2,6)H), 164.3 ( $C(2)$ ); *Minor diastereoisomer (selected signals)*  $\delta_C$ : 69.5 ( $C(3)H$ );  $^{19}F$  NMR (471 MHz,  $CDCl_3$ )  $\delta_F$ : -128.2 – -124.4 (m,  $CF_2$ ), -122.9 – -120.4 (m,  $CF_2$ ), -117.9 – -114.8 (m,  $CF_2$ ), -80.9 – -80.7 (m,  $CF_3$ ); IR (neat)  $\nu_{max}$   $cm^{-1}$ : 1869 (CO); **HRMS** (NSI<sup>+</sup>)  $C_{19}H_{11}BrF_9O_2S^+$   $[M+H]^+$  found 552.9528, requires 552.9514 (+2.5 ppm).



**(3S,4S)-4-(4-Bromophenyl)-3-(4-dimethylaminophenyl)-4-(perfluoroethyl)oxetan-2-one 47**

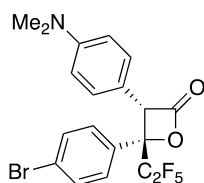

Following General Procedure C, ketone **19** (76 mg, 0.25 mmol), anhydride **S1** (213 mg, 0.625 mmol), HyperBTM (4 mg, 0.0125 mmol) and *i*-Pr<sub>2</sub>NEt (54 μL, 0.31 mmol) in CH<sub>2</sub>Cl<sub>2</sub> gave, after Biotage chromatography (0→5% Et<sub>2</sub>O in hexane), (3S,4S)-4-(4-bromophenyl)-3-(4-dimethylaminophenyl)-4-(perfluoroethyl)oxetan-2-one **47** as a colourless solid (90 mg, 80%, >95:5 dr).

**m.p.** 81–83 °C;  $[\alpha]_D^{20} = +177.8$  (c 1.0, CHCl<sub>3</sub>); **Chiral HPLC analysis**, Chiralcel OD-H (97:3 Hexane:IPA, flow rate 1.5 mLmin<sup>-1</sup>, 211 nm, 40 °C)  $t_R(3R,4R)$ : 4.0 min,  $t_R(3S,4S)$ : 5.3 min, 96:4 er; **<sup>1</sup>H NMR** (500 MHz, CDCl<sub>3</sub>)  $\delta_H$ : 2.90 (6H, s, N(CH<sub>3</sub>)<sub>2</sub>), 5.50 (1H, s, C(3)H), 6.45–6.50 (2H, m, C(3)-ArC(3,5)H), 6.65–6.70 (2H, m, C(3)ArC(2,6)H), 6.91–7.01 (2H, m, C(4)ArC(2,6)H), 7.33–7.39 (2H, m, C(4)ArC(3,5)H); *Minor diastereoisomer (selected signals)*  $\delta_H$ : 2.99 (6H, s, NCH<sub>3</sub>), 5.19 (1H, s, C(3)H); **<sup>13</sup>C{<sup>1</sup>H} NMR** (126 MHz, CDCl<sub>3</sub>)  $\delta_C$ : 40.2 (N(CH<sub>3</sub>)<sub>2</sub>), 63.8 (d, <sup>3</sup>J<sub>CF</sub> 4.0, C(3)H), 80.3 (dd, <sup>2</sup>J<sub>CF</sub> 30.6, 23.3, C(4)), 110.8–121.8 (m, CF<sub>2</sub>CF<sub>3</sub>), 112.2 (C(3)ArC(3,5)H), 114.5 (C(3)ArC(1)), 124.1 (C(4)ArC(4)), 128.2 (d, <sup>3</sup>J<sub>CF</sub> 2.9, C(4)ArC(1)), 129.3 (C(4)ArC(2,6)H), 130.7 (C(3)ArC(2,6)H), 131.4 (C(4)ArC(3,5)H), 150.8 (C(3)ArC(4)), 167.2 (C(2)); *Minor diastereoisomer (selected signals)*  $\delta_C$ : 69.4 (C(3)); **<sup>19</sup>F{<sup>1</sup>H} NMR** (471 MHz, CDCl<sub>3</sub>)  $\delta_F$ : -124.8 (d, *J* 281.5, CF<sub>2</sub>), -122.0 (d, *J* 281.3, CF<sub>2</sub>), -79.0 (CF<sub>3</sub>); *Minor diastereoisomer (selected signals)*  $\delta_F$ : -79.5 (CF<sub>3</sub>); **IR** (neat)  $\nu_{max}$  cm<sup>-1</sup>: 2895, 1850 (CO), 1614, 1528, 1194, 943; **HRMS** (APCI<sup>+</sup>) C<sub>19</sub>H<sub>16</sub>NO<sub>2</sub>F<sub>5</sub>Br<sup>+</sup> [M+H]<sup>+</sup> found 464.0285, requires 464.0279 (+1.3 ppm).

**(3S,4S)-4-(4-Bromophenyl)-3-(4-methoxyphenyl)-4-(perfluoroethyl)oxetan-2-one 48**

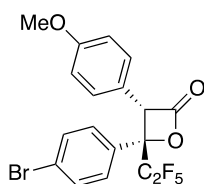

Following General Procedure C, ketone **19** (76 mg, 0.25 mmol), anhydride **S2** (197 mg, 0.63 mmol), HyperBTM (4 mg, 0.0125 mmol) and *i*-Pr<sub>2</sub>NEt (54 μL, 0.31 mmol) in CH<sub>2</sub>Cl<sub>2</sub> gave, after Biotage chromatography (0→5% Et<sub>2</sub>O in hexane), (3S,4S)-4-(4-bromophenyl)-3-(4-methoxyphenyl)-4-(perfluoroethyl)oxetan-2-one **48** as a colourless oil (106 mg, 94%, > 95:5 dr).

$[\alpha]_D^{20} = +148.2$  (c 1.0, CHCl<sub>3</sub>); **Chiral HPLC analysis**, Chiralcel OD-H (97:3 Hexane : IPA, flow rate 1.5 mLmin<sup>-1</sup>, 211 nm, 40 °C)  $t_R(3R,4R)$ : 3.6 min,  $t_R(3S,4S)$ : 4.4 min, 96:4 er; **<sup>1</sup>H NMR** (500 MHz, CDCl<sub>3</sub>)  $\delta_H$ : 3.74 (3H, s, OCH<sub>3</sub>), 5.55 (1H, s, C(3)H), 6.69–6.74 (2H, m, C(3)ArC(3,5)H), 6.75–6.80 (2H, m, C(3)ArC(2,6)H), 6.90–6.98 (2H, m, C(4)ArC(2,6)H), 7.33–7.38 (2H, m, C(4)ArC(3,5)H); *Minor*

*diastereoisomer (selected signals)*  $\delta_{\text{H}}$ : 3.84 (3H, s, OCH<sub>3</sub>), 5.22 (1H, s, C(3)H);  $^{13}\text{C}\{^1\text{H}\}$  NMR (126 MHz, CDCl<sub>3</sub>)  $\delta_{\text{C}}$ : 55.4 (OCH<sub>3</sub>), 63.5 (d,  $^3J_{\text{CF}}$  4.2, C(3)H), 80.1 (dd,  $^2J_{\text{CF}}$  30.6, 23.5, C(4)), 110.7–121.8 (CF<sub>2</sub>CF<sub>3</sub>), 114.5 (C(3)ArC(2,6)H), 119.9 (C(3)ArC(1)), 124.3 (C(4)ArC(4)), 127.9 (d,  $^3J_{\text{CF}}$  3.0, C(4)ArC(1)), 129.1 (d,  $^4J_{\text{CF}}$  2.5, C(4)ArC(2,6)H), 131.1 (C(3)ArC(3,5)H), 131.6 (C(4)ArC(3,5)H), 160.2 (C(3)ArC(4)), 166.5 (C(2)); *Minor diastereoisomer (selected signals)*  $\delta_{\text{C}}$ : 68.8 (C(3)H), 165.7 (C(2));  $^{19}\text{F}\{^1\text{H}\}$  NMR (471 MHz, CDCl<sub>3</sub>)  $\delta_{\text{F}}$ : -124.7 (d,  $J$  281.7, CF<sub>2</sub>), -121.8 (d,  $J$  281.6, CF<sub>2</sub>), -79.0 (CF<sub>3</sub>); *Minor diastereoisomer (selected signals)*  $\delta_{\text{F}}$ : -79.5 (CF<sub>3</sub>); **IR** (neat)  $\nu_{\text{max}}$  cm<sup>-1</sup>: 1851 (CO), 1516, 1196, 810; **HRMS** (APCI<sup>+</sup>) C<sub>18</sub>H<sub>13</sub>O<sub>3</sub>F<sub>5</sub>Br<sup>+</sup> [M+H]<sup>+</sup> found 450.9969, requires 450.9963 (+1.3 ppm).

**(3S,4S)-4-(4-Bromophenyl)-3-(4-fluorophenyl)-4-(perfluoroethyl)oxetan-2-one 49**

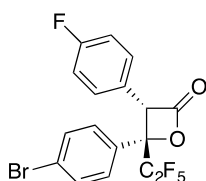

Following General Procedure C, ketone **19** (76 mg, 0.25 mmol), anhydride **S3** (182 mg, 0.625 mmol), HyperBTM (4 mg, 0.0125 mmol) and *i*-Pr<sub>2</sub>NEt (54  $\mu$ L, 0.31 mmol) in CH<sub>2</sub>Cl<sub>2</sub> gave, after Biotage chromatography (0→5% Et<sub>2</sub>O in hexane), (3S,4S)-4-(4-bromophenyl)-3-(4-fluorophenyl)-4-(perfluoroethyl)oxetan-2-one **49** as a colourless oil (98 mg, 89%, > 95:5 dr).

$[\alpha]_{\text{D}}^{20} = +135.2$  (c 0.5, CHCl<sub>3</sub>); **Chiral HPLC analysis**, Chiralcel OD-H (97:3 Hexane:IPA, flow rate 1.5 mLmin<sup>-1</sup>, 211 nm, 40 °C)  $t_{\text{R}}$ (3R,4R): 3.0 min,  $t_{\text{R}}$ (3S,4S): 3.5 min, 95:5 er;  $^1\text{H}$  NMR (500 MHz, CDCl<sub>3</sub>)  $\delta_{\text{H}}$ : 5.59 (1H, s, C(3)H), 6.84–6.88 (2H, m, C(3)ArC(2,6)H), 6.88–6.97 (4H, m, C(4)ArC(2,6)H + C(3)ArC(3,5)H), 7.35–7.40 (2H, m, C(4)ArC(3,5)H); *Minor diastereoisomer (selected signals)*  $\delta_{\text{H}}$ : 5.24 (1H, s, C(3)H);  $^{13}\text{C}\{^1\text{H}\}$  NMR (126 MHz, CDCl<sub>3</sub>)  $\delta_{\text{C}}$ : 63.3 (d,  $^3J_{\text{CF}}$  4.2, C(3)H), 80.0 (dd,  $^2J_{\text{CF}}$  30.6, 23.5, C(4)), 109.2–122.2 (CF<sub>2</sub>CF<sub>3</sub>), 116.4 (d,  $^2J_{\text{CF}}$  22.0, C(3)ArC(3,5)H), 124.0 (d,  $^4J_{\text{CF}}$  3.5, C(3)ArC(1)), 124.6 (C(4)ArC(4)), 127.6 (d,  $^3J_{\text{CF}}$  2.8, C(4)ArC(1)), 129.0 (d,  $^4J_{\text{CF}}$  2.7, C(4)ArC(2,6)H), 131.6 (d,  $^3J_{\text{CF}}$  8.6, C(3)ArC(2,6)H), 131.7 (C(4)ArC(3,5)H), 163.2 (d,  $^1J_{\text{CF}}$  250.5, C(3)ArC(4)), 165.7 (C(2)); *Minor diastereoisomer (selected signals)*  $\delta_{\text{C}}$ : 68.4 (C(3)H);  $^{19}\text{F}$  NMR (471 MHz, CDCl<sub>3</sub>)  $\delta_{\text{F}}$ : -124.5 (d,  $J$  282.7, CF<sub>2</sub>), -121.7 (d,  $J$  282.2, CF<sub>2</sub>), -110.6 (ArF), -79.0 (CF<sub>3</sub>); *Minor diastereoisomer (selected signals)*  $\delta_{\text{F}}$ : -79.5 (CF<sub>3</sub>); **IR** (neat)  $\nu_{\text{max}}$  cm<sup>-1</sup>: 1857 (CO); **HRMS** (APCI<sup>+</sup>) C<sub>17</sub>H<sub>9</sub>BrF<sub>6</sub>O<sub>2</sub><sup>+</sup> [M]<sup>+</sup> found 437.9686 requires 437.9685 (+0.2 ppm).

### (3*S*,4*S*)-3,4-Bis(4-bromophenyl)-4-(perfluoroethyl)oxetan-2-one **50**

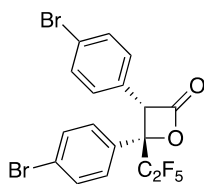

Following General Procedure C, ketone **19** (76 mg, 0.25 mmol), anhydride **S4** (258 mg, 0.63 mmol), HBTM (4 mg, 0.0125 mmol) and *i*-Pr<sub>2</sub>NEt (54  $\mu$ L, 0.31 mmol) in CH<sub>2</sub>Cl<sub>2</sub> gave, after Biotage chromatography (0 $\rightarrow$ 3% Et<sub>2</sub>O in hexane), (3*S*,4*S*)-3,4-bis(4-bromophenyl)-4-(perfluoroethyl)oxetan-2-one **50** as a colourless oil (81 mg, 65%, > 95:5 dr).

$[\alpha]_D^{20} = +139.3$  (*c* 1.0, CHCl<sub>3</sub>); **Chiral HPLC analysis**, Chiralcel OD-H (97:3 Hexane:IPA, flow rate 1.5 mLmin<sup>-1</sup>, 211 nm, 40 °C) *t*<sub>R</sub>(3*R*,4*R*): 3.6 min, *t*<sub>R</sub>(3*S*,4*S*): 4.1 min, 95:5 er; **<sup>1</sup>H NMR** (500 MHz, CDCl<sub>3</sub>)  $\delta$ <sub>H</sub>: 5.55 (1H, s, C(3)*H*), 6.72–6.79 (2H, m, C(3)ArC(2,6)*H*), 6.88–7.01 (2H, m, C(4)ArC(2,6)*H*), 7.32–7.42 (4H, m, C(3)ArC(3,5)*H* + C(4)ArC(3,5)*H*); *Minor diastereoisomer (selected signals)*  $\delta$ <sub>H</sub>: 5.22 (1H, s, C(3)*H*); **<sup>13</sup>C{<sup>1</sup>H} NMR** (126 MHz, CDCl<sub>3</sub>)  $\delta$ <sub>C</sub>: 63.3 (d, <sup>3</sup>*J*<sub>CF</sub> 4.4, C(3)*H*), 79.9 (dd, <sup>2</sup>*J*<sub>CF</sub> 30.4, 23.6, C(4)), 110.2–122.0 (CF<sub>2</sub>CF<sub>3</sub>), 124.0 (C(3)ArC(4)), 124.7 (C(4)ArC(4)), 127.0 (C(3)ArC(1)), 127.4 (d, <sup>3</sup>*J*<sub>CF</sub> 3.1, C(4)ArC(1)), 128.9 (d, <sup>4</sup>*J*<sub>CF</sub> 2.6, C(4)ArC(2,6)*H*), 131.3 (C(3)ArC(2,6)*H*), 131.8 (C(3)ArC(3,5)*H*), 132.4 (C(4)ArC(3,5)*H*), 165.3 (C(2)); *Minor diastereoisomer (selected signals)*  $\delta$ <sub>C</sub>: 68.4 (C(3)); **<sup>19</sup>F{<sup>1</sup>H} NMR** (471 MHz, CDCl<sub>3</sub>)  $\delta$ <sub>F</sub>: -124.4 (d, *J* 282.1, CF<sub>2</sub>), -121.6 (d, *J* 282.1, CF<sub>2</sub>), -78.9 (CF<sub>3</sub>); *Minor diastereoisomer (selected signals)*  $\delta$ <sub>F</sub>: -79.4 (CF<sub>3</sub>); **IR** (neat)  $\nu$ <sub>max</sub> cm<sup>-1</sup>: 1850 (CO), 1491, 1150, 938, 806; **HRMS** (APCI<sup>+</sup>) C<sub>17</sub>H<sub>10</sub>F<sub>5</sub>O<sub>2</sub>Br<sub>2</sub><sup>+</sup> [M+H]<sup>+</sup> found 498.8968, requires 498.8962 (+1.2 ppm).

### (3*S*,4*S*)-4-(4-Bromophenyl)-4-(perfluoroethyl)-3-(thiophen-3-yl)oxetan-2-one **51**

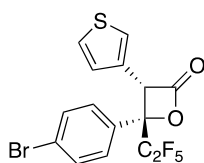

Following General Procedure C, ketone **19** (76 mg, 0.25 mmol), anhydride **S8** (167 mg, 0.63 mmol), HyperBTM (4 mg, 0.0125 mmol) and *i*-Pr<sub>2</sub>NEt (54  $\mu$ L, 0.31 mmol) in CH<sub>2</sub>Cl<sub>2</sub> gave, after Biotage chromatography (0 $\rightarrow$ 3% Et<sub>2</sub>O in hexane), (3*S*,4*S*)-4-(4-bromophenyl)-4-(perfluoroethyl)-3-(thiophen-3-yl)oxetan-2-one **51** as a colourless oil (85 mg, 80%, > 95:5 dr).

$[\alpha]_D^{20} = +93.3$  (*c* 1.0, CHCl<sub>3</sub>); **Chiral HPLC analysis**, Chiralcel OD-H (97:3 Hexane:IPA, flow rate 1.5 mLmin<sup>-1</sup>, 211 nm, 40 °C) *t*<sub>R</sub>(3*R*,4*R*): 3.4 min, *t*<sub>R</sub>(3*S*,4*S*): 4.6 min, 93:7 er; **<sup>1</sup>H NMR** (500 MHz, CDCl<sub>3</sub>)  $\delta$ <sub>H</sub>: 5.68 (1H, s, C(3)*H*), 6.49 (1H, dd, *J* 5.0, 1.4, C(3)ArC(5)*H*), 6.95–7.02 (2H, m, C(4)ArC(2,6)*H*), 7.02 (1H, dd, *J* 3.0, 1.3, C(3)ArC(2)*H*), 7.18 (1H, dd, *J* 5.0, 2.9, C(3)ArC(4)*H*), 7.36–7.42 (2H, m, C(4)ArC(3,5)*H*); *Minor diastereoisomer (selected signals)*  $\delta$ <sub>H</sub>: 5.27 (1H, s, C(3)*H*); **<sup>13</sup>C{<sup>1</sup>H} NMR** (126 MHz, CDCl<sub>3</sub>)  $\delta$ <sub>C</sub>:

59.0 (d,  $^3J_{CF}$  4.5, C(3)H), 79.8 (dd,  $^2J_{CF}$  30.6, 23.4, C(4)), 110.1–122.1 (CF<sub>2</sub>CF<sub>3</sub>), 124.5 (C(4)ArC(4)), 126.9 (C(3)ArC(2)H), 127.4 (C(3)ArC(4)H), 127.4 (C(3)ArC(5)H), 127.8 (C(3)ArC(3)), 127.9 (d,  $^3J_{CF}$  3, C(4)ArC(1)), 128.8 (d,  $^4J_{CF}$  2.5, C(4)ArC(2,6)H), 131.6 (C(4)ArC(3,5)H), 165.7 (C(2));  $^{19}F\{^1H\}$  NMR (471 MHz, CDCl<sub>3</sub>)  $\delta_F$ : -124.6 (d,  $J$  281.9, CF<sub>2</sub>), -121.8 (d,  $J$  281.9, CF<sub>2</sub>), -80.0 (CF<sub>3</sub>); *Minor diastereoisomer (selected signals)*  $\delta_F$ : -79.3 (CF<sub>3</sub>); IR (neat)  $\nu_{max}$  cm<sup>-1</sup>: 1856 (CO), 1343, 1090, 976, 814; HRMS (APCI<sup>+</sup>) C<sub>15</sub>H<sub>9</sub>O<sub>2</sub>F<sub>5</sub>SBr<sup>+</sup> [M+H]<sup>+</sup> found 426.9425 requires 426.9421 (+0.9 ppm).

**(3*S*,4*S*)-4-(4-Bromophenyl)-4-(perfluoroethyl)-3-((*E*)-prop-1-en-1-yl)oxetan-2-one **52****

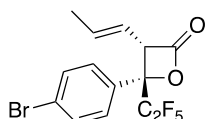

Following General Procedure C, ketone **19** (76 mg, 0.25 mmol), anhydride **10** (114 mg, 0.63 mmol), HyperBTM (4 mg, 0.0125 mmol) and *i*-Pr<sub>2</sub>NEt (54  $\mu$ L, 0.31 mmol) in CH<sub>2</sub>Cl<sub>2</sub> (crude dr 87:13) gave, after Biotage chromatography (0→2% Et<sub>2</sub>O in hexane), (3*S*,4*S*)-4-(4-bromophenyl)-4-(perfluoroethyl)-3-((*E*)-prop-1-en-1-yl)oxetan-2-one **52** as a colourless oil (84 mg, 87%, 89:11 dr).

$[\alpha]_D^{20} = +4.3$  (c 1.0, CHCl<sub>3</sub>); **Chiral HPLC analysis**, Chiralpak AD-H (99:1 Hexane:IPA, flow rate 1.5 mLmin<sup>-1</sup>, 211 nm, 40 °C)  $t_R(3*S*,4*S*): 2.9$  min,  $t_R(3*R*,4*R*): 3.3$  min, 83:17 er;  $^1H$  NMR (500 MHz, CDCl<sub>3</sub>)  $\delta_H$ : 1.66 (3H, dd,  $J$  6.6, 1.2, CH<sub>3</sub>), 4.86–4.94 (2H, m, C(3)H + CH=CHCH<sub>3</sub>), 5.80–5.90 (1H, m, CH=CHCH<sub>3</sub>), 7.20–7.25 (2H, m, C(4)ArC(2,6)H), 7.56–7.62 (2H, m, C(4)ArC(3,5)H); *Minor diastereoisomer (selected signals)*  $\delta_H$ : 1.84 (3H, dd,  $J$  6.4, 1.6, CH<sub>3</sub>), 5.92–6.01 (1H, m, CH=CHCH<sub>3</sub>);  $^{13}C\{^1H\}$  NMR (126 MHz, CDCl<sub>3</sub>)  $\delta_C$ : 18.2 (CH<sub>3</sub>), 61.3 (d,  $^3J_{CF}$  4.4, C(3)H), 78.9 (dd,  $^2J_{CF}$  30.2, 23.8, C(4)), 109.9–121.9 (CF<sub>2</sub>CF<sub>3</sub>), 118.1 (CH=CHCH<sub>3</sub>), 124.6 (C(4)ArC(4)), 128.2 (d,  $^3J_{CF}$  3.3, C(4)ArC(1)), 129.0 (d,  $^4J_{CF}$  2.7, C(4)ArC(2,6)H), 132.0 (C(4)ArC(3,5)H), 136.8 (CH=CHCH<sub>3</sub>), 166.0 (C(2)); *Minor diastereoisomer (selected signals)*  $\delta_C$ : 18.3 (CH<sub>3</sub>), 67.9 (C(3)), 124.5 (C(4)ArC(4)), 127.4 (C(4)ArC(2,6)H), 132.2 (C(4)ArC(3,5)H), 137.0 (CH=CHCH<sub>3</sub>), 165.9 (C(2));  $^{19}F\{^1H\}$  NMR (471 MHz, CDCl<sub>3</sub>)  $\delta_F$ : -124.9 (d,  $J$  282.0, CF<sub>2</sub>), -121.9 (d,  $J$  282.0, CF<sub>2</sub>), -79.0 (CF<sub>3</sub>); *Minor diastereoisomer*  $\delta_F$ : -122.2 (d,  $J$  284.0, CF<sub>2</sub>), -119.7 (d,  $J$  284.0, CF<sub>2</sub>), -79.3 (CF<sub>3</sub>); IR (neat)  $\nu_{max}$  cm<sup>-1</sup>: 1848 (C=O), 1344, 1090, 993, 812; HRMS (APCI<sup>+</sup>) C<sub>14</sub>H<sub>11</sub>O<sub>2</sub>F<sub>5</sub>Br<sup>+</sup> [M+H]<sup>+</sup> found 384.9863, requires 384.9857 (+1.6 ppm).

**(3S,4S)-4-(4-Bromophenyl)-3-(4-dimethylaminophenyl)-4-(trifluoromethyl)oxetan-2-one 53**

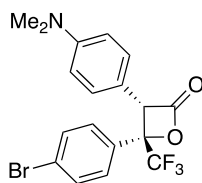

Following General Procedure D, 1-(4-bromophenyl)-2,2,2-trifluoroethan-1-one (64 mg, 0.25 mmol), anhydride **S1** (213 mg, 0.63 mmol), HyperBTM (4 mg, 0.0125 mmol) and *i*-Pr<sub>2</sub>NEt (54 μL, 0.31 mmol) in CH<sub>2</sub>Cl<sub>2</sub> gave, after Biotage column chromatography (0→5% Et<sub>2</sub>O in hexane), (3S,4S)-4-(4-bromophenyl)-3-(4-dimethylaminophenyl)-4-(trifluoromethyl)oxetan-2-one **53** as a yellow oil (78 mg, 73%, 93:7 dr).

$[\alpha]_D^{20} = +161.7$  (c 1.0, CHCl<sub>3</sub>); **Chiral HPLC analysis**, Chiralcel OD-H (97:3 Hexane:IPA, flow rate 1.5 mLmin<sup>-1</sup>, 211 nm, 40 °C)  $t_R(3R,4R)$ : 4.7 min,  $t_R(3S,4S)$ : 6.2 min, 95:5 er; **<sup>1</sup>H NMR** (500 MHz, CDCl<sub>3</sub>)  $\delta_H$ : 2.90 (6H, s, N(CH<sub>3</sub>)<sub>2</sub>), 5.33 (1H, s, C(3)H), 6.46–6.52 (2H, m, C(3)ArC(3,5)H), 6.67–6.72 (2H, m, C(3)ArC(2,6)H), 6.96–7.02 (2H, m, C(4)ArC(2,6)H), 7.36–7.41 (2H, m, C(4)ArC(3,5)H); *Minor diastereoisomer*  $\delta_H$ : 2.99 (6H, s, NCH<sub>3</sub>), 5.19 (1H, s, C(3)H), 6.72–6.75 (2H, m, C(3)ArC(3,5)H), 7.25–7.29 (2H, m, C(3)ArC(2,6)H), 7.47–7.51 (2H, m, C(4)ArC(2,6)H), 7.63–7.68 (2H, m, C(4)ArC(3,5)H); **<sup>13</sup>C{<sup>1</sup>H} NMR** (126 MHz, CDCl<sub>3</sub>)  $\delta_C$ : 40.2 (N(CH<sub>3</sub>)<sub>2</sub>), 63.2 (C(3)H), 80.5 (q, <sup>2</sup>J<sub>CF</sub> 32.4, C(4)), 112.2 (C(3)ArC(3,5)H), 114.6 (C(3)ArC(1)), 123.5 (q, <sup>1</sup>J<sub>CF</sub> 282.2, CF<sub>3</sub>), 124.1 (C(4)ArC(1)), 128.2 (C(4)ArC(4)), 129.3 (C(4)ArC(2,6)H), 130.5 (C(3)ArC(3,5)H), 131.5 (C(4)ArC(3,5)H), 150.7 (C(3)ArC(4)), 167.1 (C(2)); *Minor diastereoisomer (selected signals)*  $\delta_C$ : 40.3 (N(CH<sub>3</sub>)<sub>2</sub>), 66.4 (C(3)), 112.3 (C(3)ArC(3,5)H), 114.2 (C(3)ArC(1)), 132.2 (C(4)ArC(3,5)H), 166.4 (C(2)); **<sup>19</sup>F{<sup>1</sup>H} NMR** (471 MHz, CDCl<sub>3</sub>)  $\delta_F$ : -78.5 (CF<sub>3</sub>); *Minor diastereoisomer*  $\delta_F$ : -73.3 (CF<sub>3</sub>); **IR** (neat)  $\nu_{max}$  cm<sup>-1</sup>: 2895, 1850 (C=O), 1526, 1132, 935, 816; **HRMS** (APCI<sup>+</sup>) C<sub>18</sub>H<sub>16</sub>NO<sub>2</sub>F<sub>3</sub>Br<sup>+</sup> [M+H]<sup>+</sup> found 414.0316 requires 414.0311 (+1.2 ppm).

**(3S,4S)-4-(4-Bromophenyl)-3-(4-methoxyphenyl)-4-(trifluoromethyl)oxetan-2-one 54**

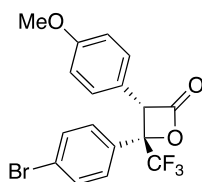

Following General Procedure D, 1-(4-bromophenyl)-2,2,2-trifluoroethan-1-one (64 mg, 0.25 mmol), anhydride **S2** (197 mg, 0.63 mmol), HyperBTM (4 mg, 0.0125 mmol) and *i*-Pr<sub>2</sub>NEt (54 μL, 0.31 mmol) in CH<sub>2</sub>Cl<sub>2</sub> gave, after Biotage chromatography (0→5% Et<sub>2</sub>O in hexane), (3S,4S)-4-(4-bromophenyl)-3-(4-methoxyphenyl)-4-(trifluoromethyl)oxetan-2-one **54** as a colourless oil (81 mg, 81%, 90:19 dr).

$[\alpha]_D^{20} = +109.5$  (c 1.0, CHCl<sub>3</sub>); **Chiral HPLC analysis**, Chiralcel OD-H (97:3 Hexane:IPA, flow rate 1.5 mLmin<sup>-1</sup>, 211 nm, 40 °C)  $t_R(3R,4R)$ : 4.1 min,  $t_R(3S,4S)$ : 4.5 min, 92:8 er; **<sup>1</sup>H NMR** (500 MHz, CDCl<sub>3</sub>)  $\delta_H$ :

3.74 (3H, s, OCH<sub>3</sub>), 5.37 (1H, s, C(3)H), 6.71–6.76 (2H, m, C(3)ArC(3,5)H), 6.78–6.83 (2H, m, C(3)ArC(2,6)H), 6.94–7.00 (2H, m, C(4)ArC(2,6)H), 7.36–7.40 (2H, m, C(4)ArC(3,5)H); *Minor diastereoisomer (selected signals)* δ<sub>H</sub>: 3.84 (3H, s, OCH<sub>3</sub>), 5.37 (1H, s, C(3)H), 7.47–7.51 (2H, m, C(4)ArC(2,6)H), 7.64–7.68 (2H, m, C(4)ArC(3,5)H); <sup>13</sup>C{<sup>1</sup>H} NMR (126 MHz, CDCl<sub>3</sub>) δ<sub>C</sub>: 55.4 (OCH<sub>3</sub>), 63.0 (C(3)H), 80.3 (q, <sup>2</sup>J<sub>CF</sub> 32.6, C(4)), 114.5 (C(3)ArC(2,6)H), 119.9 (C(3)ArC(1)), 123.4 (q, <sup>1</sup>J<sub>CF</sub> 282.2, CF<sub>3</sub>), 124.3 (C(1)ArC(4)), 127.8 (C(4)ArC(4)), 129.1 (C(4)ArC(2,6)H), 130.9 (C(3)ArC(3,5)H), 131.6 (C(4)ArC(3,5)H), 160.3 (C(3)ArC(4)), 166.4 (C(2)); *Minor diastereoisomer (selected signals)* δ<sub>C</sub>: 55.5 (OCH<sub>3</sub>), 65.9 (C(3)), 114.6 (C(3)ArC(2,6)H), 128.0 (ArC), 130.2 (C(3)ArC(3,5)H), 132.3 (C(4)ArC(3,5)H), 160.3 (C(3)ArC(4)), 165.7 (C(2)); <sup>19</sup>F{<sup>1</sup>H} NMR (471 MHz, CDCl<sub>3</sub>) δ<sub>F</sub>: –78.5 (CF<sub>3</sub>); *Minor diastereoisomer* δ<sub>F</sub>: –73.3 (CF<sub>3</sub>); IR (neat) ν<sub>max</sub> cm<sup>-1</sup>: 2961, 1852 (CO), 1516, 1254, 937, 818; HRMS (APCI<sup>+</sup>) C<sub>17</sub>H<sub>13</sub>O<sub>3</sub>F<sub>3</sub>Br<sup>+</sup> [M+H]<sup>+</sup> found 401.0002, requires 400.9995 (+1.7 ppm).

**(3S,4S)-4-(4-Bromophenyl)-3-(4-fluorophenyl)-4-(trifluoromethyl)oxetan-2-one 55**

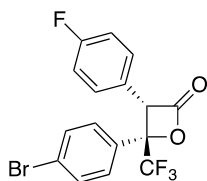

Following General Procedure D, 1-(4-bromophenyl)-2,2,2-trifluoroethan-1-one (64 mg, 0.25 mmol), anhydride **S3** (182 mg, 0.625 mmol), HyperBTM (4 mg, 0.0125 mmol) and *i*-Pr<sub>2</sub>NEt (54 μL, 0.31 mmol) in CH<sub>2</sub>Cl<sub>2</sub> gave, after Biotage chromatography (0→5% Et<sub>2</sub>O in hexane), (3S,4S)-4-(4-bromophenyl)-3-(4-fluorophenyl)-4-(trifluoromethyl)oxetan-2-one **55** as a colourless oil (91 mg, 93%) as an inseparable mixture of diastereoisomers (90:10 dr).

[α]<sub>D</sub><sup>20</sup> = +140.7 (c 1.0, CHCl<sub>3</sub>); **Chiral HPLC analysis**, Chiralcel OD-H (97:3 Hexane:IPA, flow rate 1.5 mLmin<sup>-1</sup>, 211 nm, 40 °C) t<sub>R</sub>(3R,4R): 3.3 min, t<sub>R</sub>(3S,4S): 3.9 min, 96:4 er; <sup>1</sup>H NMR (500 MHz, CDCl<sub>3</sub>) δ<sub>H</sub>: 5.40 (1H, s, C(3)H), 6.85–6.94 (4H, m, C(3)ArC(2,3,5,6)H), 6.94–6.99 (2H, m, C(4)ArC(2,6)H), 7.36–7.42 (2H, m, C(4)ArC(3,5)H); *Minor diastereoisomer* δ<sub>H</sub>: 5.25 (1H, s, C(3)H), 7.16 (2H, app t, J 8.6, C(3)ArH), 7.43–7.47 (2H, m, C(3)ArH), 7.47–7.52 (2H, m, C(4)ArC(2,6)H), 7.65–7.71 (2H, m, C(4)ArC(3,5)H); <sup>13</sup>C{<sup>1</sup>H} NMR (126 MHz, CDCl<sub>3</sub>) δ<sub>C</sub>: 62.7 (C(3)H), 80.2 (q, J 32.9, C(4)), 116.4 (d, J 22.0, C(3)ArC(3,5)H), 124.1 (d, J 3.6, C(3)ArC(1)), 124.6 (C(4)ArC(4)), 125.8 (q, J 230.7, CF<sub>3</sub>), 127.5 (C(4)ArC(1)), 129.0 (C(4)ArC(2,6)H), 131.4 (d, J 8.5, C(3)ArC(2,6)H), 131.8 (C(4)ArC(3,5)H), 163.1 (d, J 250.3, C(3)ArC(4)), 165.6 (C(2)); *Minor diastereoisomer (selected signals)* δ<sub>C</sub>: 65.5 (C(3)H), 165.1 (C(2)); <sup>19</sup>F NMR (471 MHz, CDCl<sub>3</sub>) δ<sub>F</sub>: –110.7 (ArF), –78.4 (CF<sub>3</sub>); *Minor diastereoisomer* δ<sub>F</sub>: –111.2 (ArF), –73.3 (CF<sub>3</sub>); IR (neat) ν<sub>max</sub> cm<sup>-1</sup>: 1857 (CO); HRMS (APCI<sup>+</sup>) C<sub>16</sub>H<sub>9</sub>BrF<sub>4</sub>O<sub>2</sub><sup>+</sup> [M]<sup>+</sup> found 387.9724, requires 387.9717 (+1.8 ppm).

**(3S,4S)-3,4-Bis(4-bromophenyl)-4-(trifluoromethyl)oxetan-2-one 56**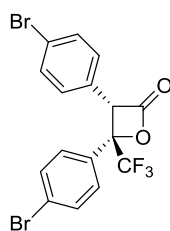

Following General Procedure D, 1-(4-bromophenyl)-2,2,2-trifluoroethan-1-one (64 mg, 0.25 mmol), anhydride **S4** (258 mg, 0.63 mmol), HyperBTM (4 mg, 0.0125 mmol) and *i*-Pr<sub>2</sub>NEt (54 μL, 0.31 mmol) in CH<sub>2</sub>Cl<sub>2</sub> (crude dr 86:14) gave, after Biotage chromatography (0→3% Et<sub>2</sub>O in hexane), (3S,4S)-3,4-bis(4-bromophenyl)-4-(trifluoromethyl)oxetan-2-one **56** as a colourless oil (97 mg, 86%, 85:15 dr).

$[\alpha]_D^{20} = +97.0$  (*c* 1.0, CHCl<sub>3</sub>); **Chiral HPLC analysis**, Chiralcel OD-H (97:3 Hexane:IPA, flow rate 1.5 mLmin<sup>-1</sup>, 211 nm, 40 °C) *t*<sub>R</sub>(3*R*,4*R*): 4.1 min, *t*<sub>R</sub>(3*S*,4*S*): 4.5 min, 91:9 er; **<sup>1</sup>H NMR** (500 MHz, CDCl<sub>3</sub>) δ<sub>H</sub>: 5.38 (1H, s, C(3)*H*), 6.75–6.80 (2H, m, C(3)ArC(2,6)*H*), 6.94–7.01 (2H, m, C(4)ArC(2,6)*H*), 7.34–7.38 (2H, m, C(3)ArC(3,5)*H*), 7.38–7.43 (2H, m, C(4)ArC(3,5)*H*); *Minor diastereoisomer* δ<sub>H</sub>: 5.23 (1H, s, C(3)*H*), 7.31–7.35 (2H, m, C(3)ArC(2,6)*H*), 7.46–7.51 (2H, m, C(4)ArC(2,6)*H*), 7.57–7.62 (2H, m, C(3)ArC(3,5)*H*), 7.65–7.69 (2H, m, C(4)ArC(3,5)*H*); **<sup>13</sup>C{<sup>1</sup>H} NMR** (126 MHz, CDCl<sub>3</sub>) δ<sub>C</sub>: 62.8 (C(3)*H*), 80.0 (q, <sup>2</sup>*J*<sub>CF</sub> 33.0, C(4)), 123.3 (q, <sup>1</sup>*J*<sub>CF</sub> 282.3, CF<sub>3</sub>), 124.0 (C(3)ArC(1)), 124.7 (C(4)ArC(1)), 127.1 (C(3)ArC(4)), 127.6 (C(4)ArC(4)), 128.9 (C(4)ArC(2,6)*H*), 131.1 (C(3)ArC(2,6)*H*), 131.9 (C(3)ArC(3,5)*H*), 132.4 (C(4)ArC(3,5)*H*), 165.2 (C(2)). *Minor diastereoisomer (selected signals)* δ<sub>C</sub>: 65.4 (C(3)*H*), 128.0 (ArCH), 130.4 (ArCH), 132.5 (ArCH), 164.7 (C(2)); **<sup>19</sup>F{<sup>1</sup>H} NMR** (471 MHz, CDCl<sub>3</sub>) δ<sub>F</sub>: -78.4 (CF<sub>3</sub>); *Minor diastereoisomer* δ<sub>F</sub>: -73.3 (CF<sub>3</sub>); **IR** (neat) ν<sub>max</sub> cm<sup>-1</sup>: 1852 (CO), 1491, 1074, 937, 818; **HRMS** (APCI<sup>+</sup>) C<sub>16</sub>H<sub>10</sub>Br<sub>2</sub>F<sub>3</sub>O<sub>2</sub><sup>+</sup> [M+H]<sup>+</sup> found 448.9002, requires 448.8994 (+1.8 ppm).

**(3S,4S)-4-(4-Bromophenyl)-3-(thiophen-3-yl)-4-(trifluoromethyl)oxetan-2-one 57**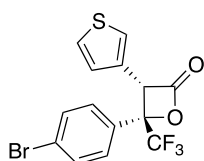

Following General Procedure D, 1-(4-bromophenyl)-2,2,2-trifluoroethan-1-one (64 mg, 0.25 mmol), anhydride **S8** (167 mg, 0.63 mmol), HyperBTM (4 mg, 0.0125 mmol) and *i*-Pr<sub>2</sub>NEt (54 μL, 0.31 mmol) in CH<sub>2</sub>Cl<sub>2</sub> (crude dr 78:22) gave, after Biotage chromatography (0→3% Et<sub>2</sub>O in hexane), (3S,4S)-4-(4-bromophenyl)-3-(thiophen-3-yl)-4-(trifluoromethyl)oxetan-2-one **57** as a colourless oil (88 mg, 94%, 89:11 dr).

$[\alpha]_D^{20} = +76.3$  (*c* 1.0, CHCl<sub>3</sub>); **Chiral HPLC analysis**, Chiralcel OD-H (97:3 Hexane:IPA, flow rate 1.5 mLmin<sup>-1</sup>, 211 nm, 40 °C) *t*<sub>R</sub>(3*R*,4*R*): 3.9 min, *t*<sub>R</sub>(3*S*,4*S*): 4.7 min, 95:5 er; **<sup>1</sup>H NMR** (500 MHz, CDCl<sub>3</sub>) δ<sub>H</sub>:

5.51 (1H, s, C(3)H), 6.51 (1H, dd,  $J$  5.0, 1.4, C(3)ArC(5)H), 7.00–7.05 (2H, m, C(4)ArC(2,6)H), 7.05 (1H, dd,  $J$  3.0, 1.3, C(3)ArC(2)H), 7.19 (1H, dd,  $J$  5.0, 2.9, C(3)ArC(4)H), 7.39–7.43 (2H, m, C(4)ArC(3,5)H). *Minor diastereoisomer*  $\delta_{\text{H}}$ : 5.27 (1H, s, C(3)H), 7.14–7.17 (1H, m, C(3)ArC(5)H), 7.43–7.51 (4H, m, C(3)ArC(2,4)H + C(4)ArC(2,6)H), 7.64–7.69 (2H, m, C(4)ArC(3,5)H);  $^{13}\text{C}\{^1\text{H}\}$  NMR (126 MHz,  $\text{CDCl}_3$ )  $\delta_{\text{C}}$ : 58.4 (C(3)), 80.0 (q,  $^2J_{\text{CF}}$  32.4, C(4)), 123.3 (q,  $^1J_{\text{CF}}$  283.0,  $\text{CF}_3$ ), 124.5 (C(4)ArC(4)), 126.7 (C(3)ArC(2)H), 127.2 (C(3)ArC(4)H), 127.4 (C(3)ArC(5)H), 127.8 (C(4)ArC(1)), 127.8 (C(3)ArC(3)), 128.8 (C(4)ArC(2,6)H), 131.7 (C(4)ArC(3,5)H), 165.6 (C(2)); *Minor diastereoisomer (selected signals)*  $\delta_{\text{C}}$ : 61.7 (C(3)), 165.3 (C(2));  $^{19}\text{F}\{^1\text{H}\}$  NMR (471 MHz,  $\text{CDCl}_3$ )  $\delta_{\text{F}}$ : -78.5 ( $\text{CF}_3$ ); *Minor diastereoisomer*  $\delta_{\text{F}}$ : -74.0 ( $\text{CF}_3$ ); IR (neat)  $\nu_{\text{max}}$   $\text{cm}^{-1}$ : 1848 (CO), 1267, 1134, 937, 818; HRMS (APCI $^+$ )  $\text{C}_{14}\text{H}_9\text{O}_2\text{F}_3\text{BrS}^+$  [M+H] $^+$  found 376.9459 requires 376.9453 (+1.6 ppm).

**(3S,4S)-4-(4-Bromophenyl)-3-((E)-prop-1-en-1-yl)-4-(trifluoromethyl)oxetan-2-one **58****

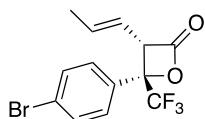

Following General Procedure D, 1-(4-bromophenyl)-2,2,2-trifluoroethan-1-one (64 mg, 0.25 mmol), anhydride **10** (114 mg, 0.63 mmol), HyperBTM (4 mg, 0.0125 mmol) and *i*-Pr<sub>2</sub>NEt (54  $\mu\text{L}$ , 0.31 mmol) in  $\text{CH}_2\text{Cl}_2$  (crude 69:31 dr) gave, after Biotage chromatography (0→1% Et<sub>2</sub>O in hexane), (3S,4S)-4-(4-bromophenyl)-3-((E)-prop-1-en-1-yl)-4-(trifluoromethyl)oxetan-2-one **58** as a colourless oil (70 mg, 84%, > 95:5 dr).

$[\alpha]_{\text{D}}^{20} = +12.1$  ( $c$  1.0,  $\text{CHCl}_3$ ); **Chiral HPLC analysis**, Chiralpak AD-H (99:1 Hexane:IPA, flow rate 1.5 mLmin<sup>-1</sup>, 211 nm, 40 °C)  $t_{\text{R}}$ (3S,4S): 3.2 min,  $t_{\text{R}}$ (3R,4R): 3.5 min, 98:2 er;  $^1\text{H}$  NMR (500 MHz,  $\text{CDCl}_3$ )  $\delta_{\text{H}}$ : 1.67 (3H, dd,  $J$  6.6, 1.7,  $\text{CH}_3$ ), 4.72 (1H, d,  $J$  9.3, C(3)H), 4.91–4.98 (1H, m,  $\text{CH}=\text{CHCH}_3$ ), 5.81–5.90 (1H, m,  $\text{CH}=\text{CHCH}_3$ ), 7.24–7.29 (2H, m, C(4)ArC(2,6)H), 7.57–7.63 (2H, m, C(4)ArC(3,5)H); *Minor diastereoisomer (selected signals)*  $\delta_{\text{H}}$ : 1.77 (3H, dd,  $J$  7.0, 1.9,  $\text{CH}_3$ );  $^{13}\text{C}\{^1\text{H}\}$  NMR (126 MHz,  $\text{CDCl}_3$ )  $\delta_{\text{C}}$ : 18.2 ( $\text{CH}_3$ ), 60.8 (C(3)H), 79.0 (q,  $^2J_{\text{CF}}$  32.7, C(4)), 118.0 ( $\text{CH}=\text{CHCH}_3$ ), 123.4 (q,  $^1J_{\text{CF}}$  282.2,  $\text{CF}_3$ ), 124.6 (C(4)ArC(4)), 128.1 (C(4)ArC(1)), 129.0 (C(4)ArC(2,6)H), 132.0 (C(4)ArC(3,5)H), 136.6 ( $\text{CH}=\text{CHCH}_3$ ), 166.0 (C(2));  $^{19}\text{F}\{^1\text{H}\}$  NMR (471 MHz,  $\text{CDCl}_3$ )  $\delta_{\text{F}}$ : -78.8 ( $\text{CF}_3$ ); IR (neat)  $\nu_{\text{max}}$   $\text{cm}^{-1}$ : 2922, 1850 (CO), 1267, 939, 816; HRMS (APCI $^+$ )  $\text{C}_{13}\text{H}_{11}\text{F}_3\text{O}_2\text{Br}^+$  [M+H] $^+$  found 334.9895 requires 334.9889 (+1.8 ppm).



## Product Derivatisations

### (2*S*,3*S*)-3-(4-Bromophenyl)-4,4,5,5,6,6,7,7,7-nonafluoro-3-hydroxy-2-phenylheptanamide **59**

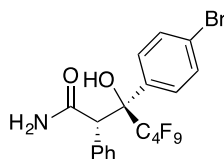

A solution of (3*S*,4*S*)-4-(4-bromophenyl)-4-(perfluorobutyl)-3-phenyloxetan-2-one **21** (104 mg, 0.2 mmol) in ammonia in dioxane (0.5 M, 2 mL, 1 mmol) was allowed to stir at r.t. for 16 h. The mixture was concentrated *in vacuo* to give a residue which was purified *via* Biotage chromatography (0→40% Et<sub>2</sub>O in hexane) to give (2*S*,3*S*)-3-(4-bromophenyl)-4,4,5,5,6,6,7,7,7-nonafluoro-3-hydroxy-2-phenylheptanamide **59** as a colourless solid (86 mg, 80%, > 95:5 dr).

**m.p.** 155–157 °C;  $[\alpha]_D^{20} = -26.0$  (c 0.5, CHCl<sub>3</sub>); **Chiral HPLC analysis**, Chiralcel OD-H (95:5 hexane:IPA, flow rate 1.5 mLmin<sup>-1</sup>, 211 nm, 40 °C)  $t_R(2R,3R)$ : 11.3 min,  $t_R(2S,3S)$ : 22.2 min, 97:3 er; **<sup>1</sup>H NMR** (500 MHz, CDCl<sub>3</sub>)  $\delta_H$ : 4.07 (1H, d, *J* 1.8, C(2)H), 5.88 (2H, d, *J* 11.3, NH<sub>2</sub>), 7.08–7.15 (3H, m, PhC(3,4,5)H), 7.21–7.25 (2H, m, PhC(2,6)H), 7.25–7.32 (4H, m, C(3)ArC(2,3,5,6)H), 8.01 (1H, s, OH); **<sup>13</sup>C{<sup>1</sup>H} NMR** (126 MHz, CDCl<sub>3</sub>)  $\delta_C$ : 51.2 (d, *J* 2.9, C(2)H), 80.6 (t, *J* 21.9, C(3)), 108.0–120.1 (CF<sub>2</sub>CF<sub>2</sub>CF<sub>2</sub>CF<sub>3</sub>), 122.5 (C(3)ArC(4)), 128.2 (C(3)ArC(2,6)H), 128.5 (PhC(3,5)H), 128.5 (PhC(4)H), 129.7 (PhC(2,6)H), 130.9 (C(3)ArC(3,5)H), 133.0 (PhC(1)), 134.5 (d, *J* 4.9, C(3)ArC(1)), 176.0 (C(1)); **<sup>19</sup>F NMR** (471 MHz, CDCl<sub>3</sub>)  $\delta_F$ : -127.1 – -124.9 (m, CF<sub>2</sub>), -119.8 – -117.7 (m, CF<sub>2</sub>), -115.1 – -112.5 (m, CF<sub>2</sub>), -80.9 – -80.7 (m, CF<sub>3</sub>); **IR** (neat)  $\nu_{max}$  cm<sup>-1</sup>: 3298 (br, OH), 3192 (NH), 1665 (CO); **HRMS** (ESI<sup>+</sup>) C<sub>19</sub>H<sub>13</sub>O<sub>2</sub>NBrF<sub>9</sub>Na<sup>+</sup> [M+Na]<sup>+</sup>, found 559.9873, requires 559.9878 (-0.9 ppm).

### (2*S*,3*S*)-*N*-Benzyl-3-(4-bromophenyl)-4,4,5,5,6,6,7,7,7-nonafluoro-3-hydroxy-2-phenylheptanamide **60**

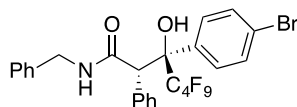

Benzylamine (109  $\mu$ L, 1 mmol) was added to a solution of (3*S*,4*S*)-4-(4-bromophenyl)-4-(perfluorobutyl)-3-phenyloxetan-2-one **21** (104 mg, 0.2 mmol) in CH<sub>2</sub>Cl<sub>2</sub> (0.1 M) and allowed to stir at r.t. for 16 h. The mixture was diluted with CH<sub>2</sub>Cl<sub>2</sub> and washed with 1 M HCl (3  $\times$  10 mL). The organic layer was dried (MgSO<sub>4</sub>), filtered and concentrated *in vacuo* to give (2*S*,3*S*)-*N*-benzyl-3-(4-bromophenyl)-4,4,5,5,6,6,7,7,7-nonafluoro-3-hydroxy-2-phenylheptanamide **60** as a colourless solid (122 mg, 97%, > 95:5 dr).

**m.p.** 159–161 °C;  $[\alpha]_D^{20} = -6.0$  (c 0.5, CHCl<sub>3</sub>); **Chiral HPLC analysis**, Chiralpak AD-H (97:3 hexane:IPA, flow rate 1.5 mLmin<sup>-1</sup>, 211 nm, 40 °C)  $t_R(2R,3R)$ : 7.3 min,  $t_R(2S,3S)$ : 19.4 min, 94:6 er; **<sup>1</sup>H NMR** (500 MHz, CDCl<sub>3</sub>)  $\delta_H$ : 3.96 (1H, d, *J* 1.8, C(2)H), 4.36 (1H, dd, *J* 14.8, 5.3, CH<sup>A</sup>H<sup>B</sup>), 4.58 (1H, dd, *J* 14.8, 6.0,

CH<sup>A</sup>H<sup>B</sup>), 6.06 (1H, app t, *J* 5.6, NH), 6.98–7.20 (5H, m, NHCH<sub>2</sub>ArH), 7.15–7.51 (9H, m, ArH), 8.19 (1H, s, OH); <sup>13</sup>C{<sup>1</sup>H} NMR (126 MHz, CDCl<sub>3</sub>) δ<sub>C</sub>: 43.9 (CH<sub>2</sub>), 52.3 (C(2)H), 80.5 (t, *J* 21.9, C(3)), 107.9–120.2 (m, CF<sub>2</sub>CF<sub>2</sub>CF<sub>2</sub>CF<sub>3</sub>), 122.4 (C(3)ArC(4)), 127.8 (NCH<sub>2</sub>ArC(2,6)H), 128.0 (ArCH), 128.1 (ArCH), 128.5 (ArCH), 129.0 (ArCH), 129.7 (C(3)ArC(2,6)H), 130.9 (NCH<sub>2</sub>ArC(3,5)H), 133.3 (PhC(1)), 134.6 (d, *J* 4.5, C(3)ArC(1)), 136.7 (NCH<sub>2</sub>ArC(1)), 173.4 (C(1)); <sup>19</sup>F NMR (471 MHz, CDCl<sub>3</sub>) δ<sub>F</sub>: -127.2 – -124.8 (m, CF<sub>2</sub>), -119.9 – -117.7 (m, CF<sub>2</sub>), -115.2 – -112.5 (m, CF<sub>2</sub>), -80.9 – -80.7 (m, CF<sub>3</sub>); IR (neat) ν<sub>max</sub> cm<sup>-1</sup>: 3242 (br, OH), 3092 (NH), 1628 (CO); HRMS (ESI<sup>+</sup>) C<sub>26</sub>H<sub>20</sub>BrF<sub>9</sub>NO<sub>2</sub> [M+H]<sup>+</sup> found 628.0523, requires 628.0528 (-0.8 ppm).

**(2*S*,3*S*)-3-(4-Bromophenyl)-4,4,5,5,6,6,7,7,7-nonafluoro-3-hydroxy-1-morpholino-2-phenylheptan-1-one 61**

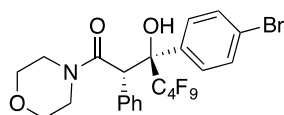

Morpholine (88 μL, 1 mmol) was added to a solution of (3*S*,4*S*)-4-(4-bromophenyl)-4-(perfluorobutyl)-3-phenyloxetan-2-one **21** (104 mg, 0.2 mmol) in CH<sub>2</sub>Cl<sub>2</sub> (0.1 M) and allowed to stir at r.t. for 16 h. The mixture was diluted with CH<sub>2</sub>Cl<sub>2</sub> and washed with 0.1 M HCl (3 × 10 mL). The organic layer was dried (MgSO<sub>4</sub>), filtered and concentrated *in vacuo* to give a residue, which was purified *via* Biotage chromatography (0→10% EtOAc in hexane) to give (2*S*,3*S*)-3-(4-bromophenyl)-4,4,5,5,6,6,7,7,7-nonafluoro-3-hydroxy-1-morpholino-2-phenylheptan-1-one **61** as a colourless solid (110 mg, 90%, > 95:5 dr).

**m.p.** 175-177 °C; [α]<sub>D</sub><sup>20</sup> = -35.0 (c 1.0, CHCl<sub>3</sub>); **Chiral HPLC analysis**, Chiralpak AD-H (97:3 hexane:IPA, flow rate 1.5 mLmin<sup>-1</sup>, 211 nm, 40 °C) t<sub>R</sub>(2*R*,3*R*): 4.6 min, t<sub>R</sub>(2*S*,3*S*): 5.2 min, 98:2 er; <sup>1</sup>H NMR (500 MHz, CDCl<sub>3</sub>) δ<sub>H</sub>: 3.36–3.81 (8H, m, CH<sub>2</sub>), 4.48 (1H, d, *J* 1.9, C(2)H), 6.91-7.75 (9H, m, ArH), 8.76 (1H, s, OH); <sup>13</sup>C{<sup>1</sup>H} NMR (126 MHz, CDCl<sub>3</sub>) δ<sub>C</sub>: 42.6 (NCH<sub>2</sub>), 46.0 (C(2)H), 46.6 (NCH<sub>2</sub>), 66.2 (OCH<sub>2</sub>), 66.5 (OCH<sub>2</sub>), 80.7 (t, *J* 21.4, C(3)), 106.6–120.1 (m, CF<sub>2</sub>CF<sub>2</sub>CF<sub>2</sub>CF<sub>3</sub>), 122.3 (C(3)ArC(4)), 127.3 (C(2)ArC(1)), 127.9 (ArCH), 128.4 (ArCH), 129.3 (ArCH), 129.9 (ArCH), 130.1 (C(3)ArC(1)), 132.2 (C(2)ArC(1)), 134.8 (C(3)ArC(1)), 171.9 (C(1)); <sup>19</sup>F NMR (471 MHz, CDCl<sub>3</sub>) δ<sub>F</sub>: -127.1 – -124.8 (m, CF<sub>2</sub>), -119.6 – -117.7 (m, CF<sub>2</sub>), -114.7 – -112.1 (m, CF<sub>2</sub>), -81.9 – -80.6 (m, CF<sub>3</sub>); IR (neat) ν<sub>max</sub> cm<sup>-1</sup>: 2970 (OH), 1717 (CO); HRMS (NSI<sup>+</sup>) C<sub>23</sub>H<sub>20</sub>BrF<sub>9</sub>NO<sub>3</sub><sup>+</sup> [M+H]<sup>+</sup> found 608.0474, requires 608.0477 (-0.6 ppm).

### Methyl (2S,3S)-3-(4-bromophenyl)-4,4,5,5,6,6,7,7,7-nonafluoro-3-hydroxy-2-phenylheptanoate **62**

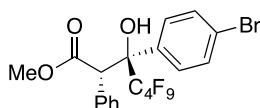

A freshly prepared solution of 1 M NaOMe in MeOH (1 mL, 1 mmol) was added to a solution of (3S,4S)-4-(4-bromophenyl)-4-(perfluorobutyl)-3-phenyloxetan-2-one **21** (104 mg, 0.2 mmol) in CH<sub>2</sub>Cl<sub>2</sub> (0.1 M) at -78 °C under an inert atmosphere and allowed to stir for 2 h. Saturated NH<sub>4</sub>Cl was added; the mixture was allowed to warm to r.t., and extracted with CH<sub>2</sub>Cl<sub>2</sub> (3 × 10 mL). The combined organic layers were dried (MgSO<sub>4</sub>), filtered and concentrated *in vacuo* to give a residue, which was purified *via* Biotage chromatography (0→2% Et<sub>2</sub>O in hexane) to give methyl (2S,3S)-3-(4-bromophenyl)-4,4,5,5,6,6,7,7,7-nonafluoro-3-hydroxy-2-phenylheptanoate **62** as a colourless solid (110 mg, 90%, > 95:5 dr).

**m.p.** 106–108 °C;  $[\alpha]_D^{20} = -67.2$  (c 1.0, CHCl<sub>3</sub>); **Chiral HPLC analysis**, Chiralpak AD-H (99:1 hexane:IPA, flow rate 1.5 mLmin<sup>-1</sup>, 211 nm, 40 °C)  $t_R(2S,3S)$ : 3.2 min,  $t_R(2R,3R)$ : 3.8 min, 98:2 er; **<sup>1</sup>H NMR** (500 MHz, CDCl<sub>3</sub>)  $\delta_H$ : 3.80 (3H, s, CH<sub>3</sub>), 4.37 (1H, d,  $J$  1.8, C(2)H), 6.71 (1H, s, OH), 7.03–7.18 (3H, m, Ph(2,4,6)H), 7.18–7.26 (2H, m, Ph(3,5)H), 7.25–7.33 (2H, m, C(3)Ar(2,6)H), 7.43 (2H, br, C(3)Ar(3,5)H); **<sup>13</sup>C{<sup>1</sup>H} NMR** (126 MHz, CDCl<sub>3</sub>)  $\delta_C$ : 51.5 (d,  $^3J_{CF}$  2.9, C(2)H), 53.4 (CH<sub>3</sub>), 80.0 (t,  $J$  22.0, C(3)), 122.6 (C(3)Ar(4)), 128.3 (PhC(4)H), 128.5 (PhC(2,6)H), 128.6 (br, C(3)ArC(2,6)H), 130.0 (C(3)ArC(3,5)H), 131.0 (br, C(3)ArC(3,5)H), 131.4 (C(3)Ar(4)C), 132.0 (PhC(1)), 133.8 (d,  $^3J_{CF}$  4.9, C(3)ArC(1)), 174.8 (C(1)); **<sup>19</sup>F NMR** (471 MHz, CDCl<sub>3</sub>)  $\delta_F$ : -127.0 – -125.0 (m, CF<sub>2</sub>), -119.8 – -117.9 (m, CF<sub>2</sub>), -116.0 – -112.8 (m, CF<sub>2</sub>), -80.9 – -80.8 (m, CF<sub>3</sub>); **IR** (neat)  $\nu_{max}$  cm<sup>-1</sup>: 3368 (br, OH), 1712 (CO); **HRMS** (APCI<sup>+</sup>) C<sub>20</sub>H<sub>15</sub>BrF<sub>9</sub>O<sub>3</sub><sup>+</sup> [M+H]<sup>+</sup> found 553.0065, requires 553.0055 (+1.8 ppm).

### **tert**-Butyl 5-methoxy-2-(4-((2S,3S)-4-oxo-2-(perfluorobutyl)-3-phenyloxetan-2-yl)phenyl)-1H-indole-1-carboxylate **64**

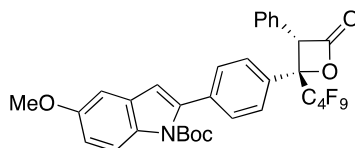

*N*-Boc-5-methoxyindole-2-boronic acid (88 mg, 0.3 mmol), Pd(PPh<sub>3</sub>)<sub>4</sub> (29 mg, 0.025 mmol) and 2 M aqueous Na<sub>2</sub>CO<sub>3</sub> (0.38 mL, 0.76 mmol) were added to a solution of (3S,4S)-4-(4-bromophenyl)-4-(perfluorobutyl)-3-phenyloxetan-2-one **21** (130 mg, 0.25 mmol) in degassed DMF (4 mL) under an inert atmosphere, and the mixture was heated at 85 °C for 4 h. After cooling to r.t. and water and CH<sub>2</sub>Cl<sub>2</sub> were added, and the mixture was extracted with CH<sub>2</sub>Cl<sub>2</sub> (3 × 10 mL). The combined organic layers were dried (MgSO<sub>4</sub>), filtered and concentrated *in vacuo* to give a residue, which was purified *via* Biotage column chromatography (0→50% CH<sub>2</sub>Cl<sub>2</sub> in hexane) to give *tert*-butyl 5-methoxy-2-(4-

((2*S*,3*S*)-4-oxo-2-(perfluorobutyl)-3-phenyloxetan-2-yl)phenyl)-1*H*-indole-1-carboxylate **64** as a colourless oil (60 mg, 35%, > 95:5 dr).

$[\alpha]_D^{20} = 120.4$  (*c* 1.0, CHCl<sub>3</sub>); **Chiral HPLC analysis**, Chiralcel OD-H (97:3 Hexane:IPA, flow rate 1.5 mLmin<sup>-1</sup>, 211 nm, 40 °C) *t*<sub>R</sub>(2*R*,3*R*): 3.7 min, *t*<sub>R</sub>(2*S*,3*S*): 4.8 min, 97:3 er; **<sup>1</sup>H NMR** (500 MHz, CDCl<sub>3</sub>) δ<sub>H</sub>: 1.28 (9H, s, C(CH<sub>3</sub>)<sub>3</sub>), 3.85 (3H, s, OCH<sub>3</sub>), 5.64 (1H, s, C(3)*H*), 6.39 (1H, s, IndC(3)*H*), 6.89–6.92 (2H, m, PhC(2,6)*H*), 6.93 (1H, dd, *J* 9.0, 2.6, IndC(6)*H*), 6.98 (1H, d, *J* 2.6, IndC(4)*H*), 7.11 (2H, d, *J* 7.9, C(4)ArC(3,5)*H*), 7.17–7.22 (2H, m, PhC(3,5)*H*), 7.23–7.27 (3H, m, C(4)ArC(2,6)*H* + PhC(4)*H*), 8.07 (1H, d, *J* 9.0, Ind(7)*H*); **<sup>13</sup>C{<sup>1</sup>H} NMR** (126 MHz, CDCl<sub>3</sub>) δ<sub>C</sub>: 27.8 (C(CH<sub>3</sub>)<sub>3</sub>), 55.8 (OCH<sub>3</sub>), 64.6 (d, <sup>3</sup>*J*<sub>CF</sub> 4.3, C(3)*H*), 81.3 (dd, <sup>2</sup>*J*<sub>CF</sub> 31.4, 23.0, C(4)), 83.6 (C(CH<sub>3</sub>)<sub>3</sub>), 103.1 (IndC(4)*H*), 111.2 (IndC(3)*H*), 113.6 (IndC(6)*H*), 116.2 (IndC(7)*H*), 127.1 (C(4)ArC(3,5)*H*), 127.7 (C(4)ArC(1)), 128.2 (C(4)ArC(2,6)*H*), 128.2 (PhC(1)), 129.0 (PhC(3,5)*H*), 129.4 (PhC(4)*H*), 129.8 (IndC(3a)), 129.9 (PhC(2,6)*H*), 132.7 (IndC(7a)), 136.1 (IndC(2)), 139.7 (C(4)ArC(4)), 150.1 (NCOOC(CH<sub>3</sub>)<sub>3</sub>), 156.2 (IndC(5)), 166.3 (C(2)), C<sub>4</sub>F<sub>9</sub> not observed; **<sup>19</sup>F NMR** (471 MHz, CDCl<sub>3</sub>) δ<sub>F</sub>: -128.0 – -124.6 (m, CF<sub>2</sub>), -122.4 – -120.9 (m, CF<sub>2</sub>), -118.0 – -116.0 (m, CF<sub>2</sub>), -80.9 – -80.8 (m, CF<sub>3</sub>); **IR** (neat) ν<sub>max</sub> cm<sup>-1</sup>: 1854 (CO), 1732 (CO); **HRMS** (NSI<sup>+</sup>) C<sub>33</sub>H<sub>27</sub>F<sub>9</sub>NO<sub>5</sub><sup>+</sup> [M+H]<sup>+</sup> found 688.1727 requires 688.1740 (-1.9 ppm).

#### (2*R*,3*S*)-3-(4-Bromophenyl)-4,4,5,5,6,6,7,7,7-nonafluoro-2-phenylheptane-1,3-diol **65**

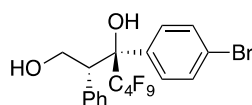

Following General Procedure E, lactone **21** (208 mg, 0.4 mmol) and DIBAL solution (0.8 mL, 0.8 mmol) in CH<sub>2</sub>Cl<sub>2</sub> (4 mL) gave, after Biotage column chromatography (0→20% Et<sub>2</sub>O in hexane), (2*R*,3*S*)-3-(4-bromophenyl)-4,4,5,5,6,6,7,7,7-nonafluoro-2-phenylheptane-1,3-diol **65** as a colourless solid (117 mg, 56%).

**m.p.** 121–123 °C;  $[\alpha]_D^{20} = -36.9$  (*c* 1.0, CHCl<sub>3</sub>); **Chiral HPLC analysis**, Chiralcel OD-H (97:3 Hexane:IPA, flow rate 1.5 mLmin<sup>-1</sup>, 211 nm, 40 °C) *t*<sub>R</sub>(2*S*,3*R*): 16.7 min, *t*<sub>R</sub>(2*R*,3*S*): 26.5 min, 97:3 er; **<sup>1</sup>H NMR** (500 MHz, CDCl<sub>3</sub>) δ<sub>H</sub>: 2.16 (1H, s, OH), 3.61–3.66 (1H, m, C(2)*H*), 4.02–4.09 (1H, m, C(1)*H*<sup>A</sup>*H*<sup>B</sup>), 4.65 (1H, ddd, *J* 11.3, 3.5, 1.8, C(1)*H*<sup>A</sup>*H*<sup>B</sup>), 6.06 (1H, s, OH), 7.07–7.25 (6H, m, Ar*H*), 7.26–7.42 (3H, m, Ar*H*); **<sup>13</sup>C{<sup>1</sup>H} NMR** (126 MHz, CDCl<sub>3</sub>) δ<sub>C</sub>: 50.1 (C(2)*H*), 66.3 (d, <sup>4</sup>*J*<sub>CF</sub> 6.6, C(1)*H*<sub>2</sub>), 81.6 (t, <sup>2</sup>*J*<sub>CF</sub> 22.4, C(3)), 115.1–121.7 (m, CF<sub>2</sub>CF<sub>2</sub>CF<sub>2</sub>CF<sub>3</sub>), 122.3 (C(3)ArC(4)), 127.3 (PhC(4)*H*), 128.3 (PhC(3,5)*H*), 128.6 (C(3)ArC(2,6)*H*), 130.0 (PhC(2,6)*H*), 130.8 (C(3)ArC(3,5)*H*), 135.7 (d, *J* 4.4, <sup>3</sup>*J*<sub>CF</sub>, C(3)ArC(1)), 138.0 (PhC(1)); **<sup>19</sup>F NMR** (471 MHz, CDCl<sub>3</sub>) δ<sub>F</sub>: -127.9 – -124.0 (m, CF<sub>2</sub>), -121.7 – -116.0 (m, CF<sub>2</sub>), -114.9 – -113.1 (m, CF<sub>2</sub>), -80.9 – -80.7 (m, CF<sub>3</sub>); **IR** (neat) ν<sub>max</sub> cm<sup>-1</sup>: 3383 (br, OH); **HRMS** (NSI<sup>+</sup>) C<sub>19</sub>H<sub>18</sub>NBrF<sub>9</sub>O<sub>2</sub><sup>+</sup> [M+NH<sub>4</sub>]<sup>+</sup> found 542.0358 requires 542.0372 (-2.6 ppm).

**(2R,3S)-3-(4-Bromophenyl)-4,4,5,5,6,6,7,7,7-nonafluoro-2-(4-methoxyphenyl)heptane-1,3-diol 66**

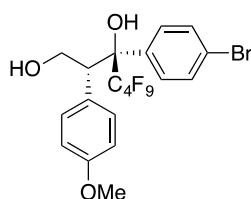

Following General Procedure E, lactone **37** (330 mg, 0.6 mmol) and DIBAL solution (1.2 mL, 1.2 mmol) in CH<sub>2</sub>Cl<sub>2</sub> (6 mL) gave, after Biotage column chromatography (0→25% Et<sub>2</sub>O in hexane), (2R,3S)-3-(4-bromophenyl)-4,4,5,5,6,6,7,7,7-nonafluoro-2-(4-methoxyphenyl)heptane-1,3-diol **66** as a colourless oil (210 mg, 63%).

$[\alpha]_D^{20} = -27.3$  (*c* 1.0, CHCl<sub>3</sub>); **Chiral HPLC analysis**, Chiralcel OD-H (97:3 Hexane:IPA, flow rate 1.5 mLmin<sup>-1</sup>, 211 nm, 40 °C) *t*<sub>R</sub>(2R,3S): 8.3 min, *t*<sub>R</sub>(2S,3R): 10.8 min, 97:3 er; **<sup>1</sup>H NMR** (500 MHz, CDCl<sub>3</sub>) δ<sub>H</sub>: 2.09 (1H, dd, *J* 5.7, 4.3, C(1)OH), 3.57–3.62 (1H, m, C(2)H), 3.72 (3H, s, OCH<sub>3</sub>), 3.99–4.07 (1H, m, C(1)H<sup>A</sup>H<sup>B</sup>), 4.56–4.64 (1H, C(1)H<sup>A</sup>H<sup>B</sup>), 5.96 (1H, s, C(3)OH), 6.62–6.67 (2H, m, C(2)ArC(3,5)H), 7.02–7.08 (2H, m, C(2)ArC(2,6)H), 7.08–7.38 (4H, m, C(3)ArC(2,3,5,6)H); **<sup>13</sup>C{<sup>1</sup>H} NMR** (126 MHz, CDCl<sub>3</sub>) δ<sub>C</sub>: 49.3 (C(2)H), 55.2 (OCH<sub>3</sub>), 66.5 (d, *J* 6.3, C(1)H<sub>2</sub>), 81.6 (t, *J* 22.4, C(3)), 113.6 (C(2)ArC(3,5)H), 122.2 (C(3)ArC(4)), 128.6 (C(3)ArC(2,6)H), 129.9 (C(2)ArC(1)), 130.8 (C(3)ArC(3,5)H), 131.0 (C(2)ArC(2,6)H), 135.8 (C(3)ArC(1)), 158.6 (C(2)ArC(4)); **<sup>19</sup>F NMR** (471 MHz, CDCl<sub>3</sub>) δ<sub>F</sub>: -128.0 – -124.1 (m, CF<sub>2</sub>), -121.7 – -116.0 (m, CF<sub>2</sub>), -114.9 – -113.3 (m, CF<sub>2</sub>), -80.9 – -80.7 (m, CF<sub>3</sub>); **IR** (neat) ν<sub>max</sub> cm<sup>-1</sup>: (3336, br OH); **HRMS** (APCI<sup>+</sup>) C<sub>20</sub>H<sub>20</sub>NO<sub>3</sub>F<sub>9</sub>Br<sup>+</sup> [M+NH<sub>4</sub>]<sup>+</sup> found 572.0485 requires 572.0477 (+1.4 ppm).

**(2R,3S)-3-(4-Bromophenyl)-4,4,5,5,5-pentafluoro-2-phenylpentane-1,3-diol 67**

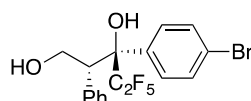

Following General Procedure E, lactone **22** (252 mg, 0.6 mmol) and DIBAL solution (1.2 mL, 1.2 mmol) in CH<sub>2</sub>Cl<sub>2</sub> (6 mL) gave, after Biotage column chromatography (0→20% Et<sub>2</sub>O in hexane), (2R,3S)-3-(4-bromophenyl)-4,4,5,5,5-pentafluoro-2-phenylpentane-1,3-diol **67** as a colourless oil (156 mg, 61%).

$[\alpha]_D^{20} = -30.3$  (*c* 1.0, CHCl<sub>3</sub>); **Chiral HPLC analysis**, Chiralcel OD-H (97:3 Hexane:IPA, flow rate 1.5 mLmin<sup>-1</sup>, 211 nm, 40 °C) *t*<sub>R</sub>(2S,3R): 20.9 min, *t*<sub>R</sub>(2R,3S): 30.7 min, 94:6 er; **<sup>1</sup>H NMR** (500 MHz, CDCl<sub>3</sub>) δ<sub>H</sub>: 2.19 (1H, br, C(1)OH), 3.66–3.70 (1H, m, C(2)H), 4.08 (1H, app dt, *J* 11.2, 2.7, C(1)H<sup>A</sup>H<sup>B</sup>), 4.69 (1H, ddd, *J* 11.2, 3.5, 2.1, C(1)H<sup>A</sup>H<sup>B</sup>), 6.03 (1H, s, C(3)OH), 7.11–7.16 (3H, m, PhC(3,4,5)H), 7.17–7.23 (2H, m, PhC(2,6)H), 7.25–7.40 (4H, m, C(3)ArC(2,3,5,6)H); **<sup>13</sup>C{<sup>1</sup>H} NMR** (126 MHz, CDCl<sub>3</sub>) δ<sub>C</sub>: 49.5 (C(2)H), 66.4 (d, *J* 7.5, C(1)H<sub>2</sub>), 80.3 (t, *J* 22.0, C(3)), 112.5–120.7 (m, CF<sub>2</sub>CF<sub>3</sub>), 122.3 (C(3)ArC(4)), 127.3 (PhC(4)H), 128.4 (PhC(3,5)H), 128.4 (C(3)ArC(2,6)H), 129.9 (PhC(2,6)H), 130.9 (C(3)ArC(3,5)H), 136.0

(d,  $J$  5.0, C(3)ArC(1)), 138.1 (PhC(1));  $^{19}\text{F NMR}$  (471 MHz,  $\text{CDCl}_3$ )  $\delta_{\text{F}}$ : -119.7 (d,  $J$  271.2,  $\text{CF}_2$ ), -117.7 (dt,  $J$  270.7, 2.2  $\text{CF}_2$ ), -77.7 ( $\text{CF}_3$ ); **IR** (neat)  $\nu_{\text{max}}$   $\text{cm}^{-1}$ : (3304, br, OH); **HRMS** (APCI $^+$ )  $\text{C}_{17}\text{H}_{18}\text{NO}_2\text{F}_5\text{Br}^+$   $[\text{M}+\text{NH}_4]^+$  found 442.0441 requires 442.0436 (+1.6 ppm).

**(2R,3S)-4,4,5,5,5-Pentafluoro-2-phenyl-3-(4-(trifluoromethyl)phenyl)pentane-1,3-diol 68**

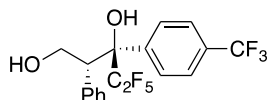

Following General Procedure E, lactone **27** (246 mg, 0.6 mmol) and DIBAL solution (1.2 mL, 1.2 mmol) in  $\text{CH}_2\text{Cl}_2$  (6 mL) gave, after Biotage column chromatography (0 $\rightarrow$ 20%  $\text{Et}_2\text{O}$  in hexane), (2R,3S)-4,4,5,5,5-pentafluoro-2-phenyl-3-(4-(trifluoromethyl)phenyl)pentane-1,3-diol **68** as a colourless oil (139 mg, 56%).

$[\alpha]_{\text{D}}^{20} = -28.1$  (c 1.0,  $\text{CHCl}_3$ ); **Chiral HPLC analysis**, Chiralpak IC (99:1 Hexane:IPA, flow rate 1.5  $\text{mLmin}^{-1}$ , 211 nm, 40  $^{\circ}\text{C}$ )  $t_{\text{R}}(2\text{S},3\text{R})$ : 3.9 min,  $t_{\text{R}}(2\text{R},3\text{S})$ : 4.7 min, 95:5 er;  $^1\text{H NMR}$  (500 MHz,  $\text{CDCl}_3$ )  $\delta_{\text{H}}$ : 2.14 (1H, dd,  $J$  6.0, 4.1, C(1)OH), 3.67–3.71 (1H, m, C(2)H), 4.03–4.19 (1H, m, C(1) $H^{\text{A}}H^{\text{B}}$ ), 4.63–4.81 (1H, m, C(1) $H^{\text{A}}H^{\text{B}}$ ), 6.11 (1H, s, C(3)OH), 7.07–7.13 (3H, m, PhC(2,4,6)H), 7.15–7.20 (2H, m, PhC(3,5)H), 7.30–7.90 (4H, m, C(3)ArC(2,3,5,6)H);  $^{13}\text{C}\{^1\text{H}\}$  **NMR** (126 MHz,  $\text{CDCl}_3$ )  $\delta_{\text{C}}$ : 49.5 (C(2)H), 66.5 (d,  $^4J_{\text{CF}}$  7.6, C(1) $\text{H}_2$ ), 80.4 (t,  $J$  22,1, C(3)), 112.4–122.5 (m,  $\text{CF}_2\text{CF}_3$ ), 124.0 (q,  $J$  272.0,  $\text{ArCF}_3$ ), 124.7 (C(3)ArC(2,6)H), 127.1 (C(3)ArC(3,5)H), 127.4 (PhC(4)H), 128.4 (PhC(2,6)H), 129.9 (PhC(3,5)H), 130.2 (q,  $J$  32.7, C(3)ArC(4)), 137.9 (PhC(1)), 140.9 (d,  $^3J_{\text{CF}}$  4.9, C(3)ArC(1));  $^{19}\text{F NMR}$  (471 MHz,  $\text{CDCl}_3$ )  $\delta_{\text{F}}$ : -119.6 (d,  $J$  271.1,  $\text{CF}_2$ ), -117.8 (d,  $J$  271.1,  $\text{CF}_2$ ), -77.7 ( $\text{CF}_2\text{CF}_3$ ), -62.7 ( $\text{ArCF}_3$ ); **IR** (neat)  $\nu_{\text{max}}$   $\text{cm}^{-1}$ : (3337, br OH); **HRMS** (APCI $^+$ )  $\text{C}_{18}\text{H}_{18}\text{NO}_2\text{F}_8^+$   $[\text{M}+\text{NH}_4]^+$  found 432.1203 requires 432.1204 (-0.2 ppm).

**(2R,3S)-3-(4-Bromophenyl)-4,4,4-trifluoro-2-phenylbutane-1,3-diol 69**

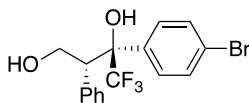

Following General Procedure E, lactone **23** (223 mg, 0.6 mmol) and DIBAL solution (1.2 mL, 1.2 mmol) in  $\text{CH}_2\text{Cl}_2$  (6 mL) gave, after Biotage column chromatography (0 $\rightarrow$ 20%  $\text{Et}_2\text{O}$  in hexane), (2R,3S)-3-(4-bromophenyl)-4,4,4-trifluoro-2-phenylbutane-1,3-diol **69** as a colourless oil (164 mg, 73%).

$[\alpha]_{\text{D}}^{20} = -29.4$  (c 1.0,  $\text{CHCl}_3$ ); **Chiral HPLC analysis**, Chiralpak IC (97:3 Hexane:IPA, flow rate 1.5  $\text{mLmin}^{-1}$ , 211 nm, 40  $^{\circ}\text{C}$ )  $t_{\text{R}}(2\text{S},3\text{R})$ : 4.7 min,  $t_{\text{R}}(2\text{R},3\text{S})$ : 5.8 min, 94:6 er;  $^1\text{H NMR}$  (500 MHz,  $\text{CDCl}_3$ )  $\delta_{\text{H}}$ : 2.13–2.20 (1H, m, C(1)OH), 3.53 (1H, app t,  $J$  3.2, C(2)H), 4.04–4.11 (1H, m, C(1) $H^{\text{A}}H^{\text{B}}$ ), 4.60–4.67 (1H, m, C(1) $H^{\text{A}}H^{\text{B}}$ ), 5.76 (1H, s, C(3)OH), 7.12–7.16 (3H, m, PhC(2,4,6)H), 7.17–7.21 (2H, PhC(3,5)H), 7.25–7.29 (2H, m, C(3)ArC(2,6)H), 7.30–7.34 (2H, m, C(3)ArC(3,5)H);  $^{13}\text{C}\{^1\text{H}\}$  **NMR** (126 MHz,  $\text{CDCl}_3$ )  $\delta_{\text{C}}$ :

49.3 (C(2)H), 65.9 (d,  $^4J_{CF}$  3.1, C(1)H<sub>2</sub>), 80.7 (q,  $^2J_{CF}$  27.2, C(3)), 122.3 (C(3)ArC(4)), 125.8 (q,  $J$  288.3, CF<sub>3</sub>), 127.3 (PhC(4)H), 128.1 (C(3)ArC(2,6)H), 128.4 (PhC(2,6)H), 129.8 (PhC(3,5)H), 131.1 (C(3)ArC(3,5)H), 136.7 (C(3)ArC(1)), 137.9 (PhC(1));  $^{19}\text{F}$  NMR (471 MHz, CDCl<sub>3</sub>)  $\delta_{\text{F}}$ : -74.9 (CF<sub>3</sub>); IR (neat)  $\nu_{\text{max}}$  cm<sup>-1</sup>: 3352 (br, OH); HRMS (APCI+) C<sub>16</sub>H<sub>18</sub>NO<sub>2</sub>F<sub>3</sub>Br [M+NH<sub>4</sub>]<sup>+</sup> found 392.0466 requires 392.0468 (-0.5 ppm).

### (2*S*,3*R*)-2-(4-Bromophenyl)-2-(perfluorobutyl)-3-phenyloxetane **70**

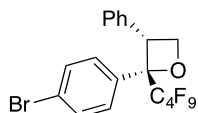

Following General Procedure F, diol **65** (107 mg, 0.21 mmol), NaH (17 mg, 0.42 mmol) and 2,4,6-triisopropylbenzenesulfonyl chloride (56 mg, 0.19 mmol) in THF (10 mL) gave, after Biotage column chromatography (0→1% Et<sub>2</sub>O in hexane), (2*S*,3*R*)-2-(4-bromophenyl)-2-(perfluorobutyl)-3-phenyloxetane **XX** as a colourless oil (102 mg, 96%).

$[\alpha]_{\text{D}}^{20} = +115.6$  (c 1.0, CHCl<sub>3</sub>); Chiral HPLC analysis, Chiralcel OD-H (97:3 Hexane:IPA, flow rate 1.5 mLmin<sup>-1</sup>, 211 nm, 40 °C)  $t_{\text{R}}$ (2*S*,3*R*): 3.5 min,  $t_{\text{R}}$ (2*R*,3*S*): 6.3 min, 97:3 er;  $^1\text{H}$  NMR (500 MHz, CDCl<sub>3</sub>)  $\delta_{\text{H}}$ : 4.78 (1H, app t,  $J$  6.5, C(4)H<sup>A</sup>H<sup>B</sup>), 4.85 (1H, dd,  $J$  8.6, 6.9, C(3)H), 5.14 (1H, dd,  $J$  8.5, 6.0, C(4)H<sup>A</sup>H<sup>B</sup>), 6.80–7.06 (4H, m, PhC(2,6)H + C(2)ArC(2,6)H), 7.13–7.21 (3H, m, PhC(3,4,5)H), 7.24–7.33 (2H, m, C(2)ArC(3,5)H);  $^{13}\text{C}\{^1\text{H}\}$  NMR (126 MHz, CDCl<sub>3</sub>)  $\delta_{\text{C}}$ : 45.4 (t,  $^3J_{CF}$  3.6, C(3)H), 73.9 (C(4)H<sub>2</sub>), 89.8–90.3 (m, C(2)), 105.9–121.3 (m, CF<sub>2</sub>CF<sub>2</sub>CF<sub>2</sub>CF<sub>3</sub>), 122.8 (C(2)ArC(4)), 128.2 (PhC(4)H), 128.5 (PhC(3,5)H), 128.6 (C(2)ArC(2,6)H), 129.3 (PhC(2,6)H), 130.9 (C(2)ArC(3,5)H), 132.4 (d,  $^3J_{CF}$  3.8, C(2)ArC(1)), 135.0 (PhC(1));  $^{19}\text{F}$  NMR (471 MHz, CDCl<sub>3</sub>)  $\delta_{\text{F}}$ : -128.2 – -127.3 (m, CF<sub>2</sub>), -125.4 – -124.5 (m, CF<sub>2</sub>), -123.8 – -123.0 (m, CF<sub>2</sub>), -122.9 – -122.1 (m, CF<sub>2</sub>), -121.7 – -120.8 (m, CF<sub>2</sub>), -118.5 – -117.6 (m, CF<sub>2</sub>), -80.9 – -80.8 (m, CF<sub>3</sub>); IR (neat)  $\nu_{\text{max}}$  cm<sup>-1</sup>: 1234 (C-O), 1134 (C-O); HRMS could not be obtained.

### (2*S*,3*R*)-2-(4-Bromophenyl)-3-(4-methoxyphenyl)-2-(perfluorobutyl)oxetane **71**

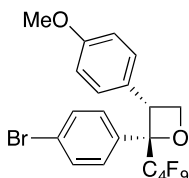

Following General Procedure F, diol **66** (194 mg, 0.35 mmol), NaH (28 mg, 0.70 mmol) and 2,4,6-triisopropylbenzenesulfonyl chloride (93 mg, 0.31 mmol) in THF (17 mL) gave, after Biotage column chromatography (0→3% Et<sub>2</sub>O in hexane), (2*S*,3*R*)-2-(4-bromophenyl)-3-(4-methoxyphenyl)-2-(perfluorobutyl)oxetane **71** as a colourless oil (152 mg, 92%).

$[\alpha]_D^{20} = +108.5$  (c 1.0, CHCl<sub>3</sub>); **Chiral HPLC analysis**, Chiralcel OD-H (97:3 Hexane:IPA, flow rate 1.5 mLmin<sup>-1</sup>, 211 nm, 40 °C)  $t_R(2S,3R)$ : 3.7 min,  $t_R(2R,3S)$ : 5.1 min, 97:3 er; **<sup>1</sup>H NMR** (500 MHz, CDCl<sub>3</sub>)  $\delta_H$ : 3.75 (3H, s, CH<sub>3</sub>), 4.72 (1H, app t,  $J$  6.6, C(4)H<sup>A</sup>H<sup>B</sup>), 4.80 (1H, dd,  $J$  8.7, 7.1, C(3)H), 5.12 (1H, dd,  $J$  8.7, 6.1, C(4)H<sup>A</sup>H<sup>B</sup>), 6.67–6.72 (2H, m, C(3)ArC(3,5)H), 6.84–6.90 (2H, m, C(3)ArC(2,6)H), 6.91 (2H, br, C(2)ArC(2,6)H), 7.28–7.37 (2H, m, C(2)ArC(3,5)H); **<sup>13</sup>C{<sup>1</sup>H} NMR** (126 MHz, CDCl<sub>3</sub>)  $\delta_C$ : 44.8 (t, <sup>3</sup>J<sub>CF</sub> 3.6, C(3)H), 55.4 (OCH<sub>3</sub>), 74.4 (C(4)H<sub>2</sub>), 89.9–90.5 (m, C(2)), 105.4–122.1 (CF<sub>2</sub>CF<sub>2</sub>CF<sub>2</sub>CF<sub>3</sub>), 113.8 (C(3)ArC(3,5)H), 122.8 (C(2)ArC(4)), 127.1 (C(3)ArC(1)), 128.7 (d, <sup>4</sup>J<sub>CF</sub> 3.1, C(2)ArC(2,6)H), 130.4 (C(3)ArC(2,6)H), 130.9 (C(2)ArC(3,5)H), 132.5 (d, <sup>3</sup>J<sub>CF</sub> 3.5, C(2)ArC(1)), 159.3 (C(3)ArC(4)); **<sup>19</sup>F NMR** (471 MHz, CDCl<sub>3</sub>)  $\delta_F$ : -128.2 – -127.3 (m, CF<sub>2</sub>), -125.4 – -124.5 (m, CF<sub>2</sub>), -123.8 – -122.9 (m, CF<sub>2</sub>), -122.9 – -122.1 (m, CF<sub>2</sub>), -121.8 – -121.0 (m, CF<sub>2</sub>), -118.5 – -117.6 (m, CF<sub>2</sub>), -80.9 – -80.8 (m, CF<sub>3</sub>); **IR** (neat)  $\nu_{max}$  cm<sup>-1</sup>: 1234 (C-O), 1134 (C-O); **HRMS** (APCI<sup>+</sup>) C<sub>20</sub>H<sub>15</sub>O<sub>2</sub>F<sub>9</sub>Br<sup>+</sup> [M+H]<sup>+</sup> found 537.0112 requires 537.0106 (+1.1 ppm).

**(2S,3R)-2-(4-Bromophenyl)-2-(perfluoroethyl)-3-phenyloxetane 72**

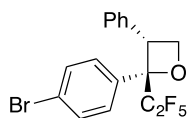

Following General Procedure F, diol **67** (104 mg, 0.24 mmol), NaH (20 mg, 0.49 mmol) and 2,4,6-triisopropylbenzenesulfonyl chloride (64 mg, 0.22 mmol) in THF (12 mL) gave, after Biotage column chromatography (0→1% Et<sub>2</sub>O in hexane), (2S,3R)-2-(4-bromophenyl)-3-phenyl-2-(trifluoromethyl)oxetane **72** as a colourless oil (94 mg, 92%).

$[\alpha]_D^{20} = +115.6$  (c 1.0, CHCl<sub>3</sub>); **Chiral HPLC analysis**, Chiralcel OD-H (97:3 Hexane:IPA, flow rate 1.5 mLmin<sup>-1</sup>, 211 nm, 40 °C)  $t_R(2S,3R)$ : 4.2 min,  $t_R(2R,3S)$ : 6.2 min, 94:6 er; **<sup>1</sup>H NMR** (500 MHz, CDCl<sub>3</sub>)  $\delta_H$ : 4.77 (1H, dd,  $J$  6.9, 5.9, C(4)H<sup>A</sup>H<sup>B</sup>), 4.83 (1H, dd,  $J$  8.3, 6.9, C(3)H), 5.14 (1H, dd,  $J$  8.4, 5.9, C(4)H<sup>A</sup>H<sup>B</sup>), 6.82–6.95 (2H, m, C(2)ArC(2,6)H), 6.96–7.01 (2H, m, PhC(2,6)H), 7.12–7.21 (3H, m, Ph(3,4,5)H), 7.24–7.31 (2H, m, C(2)ArC(3,5)H); **<sup>13</sup>C{<sup>1</sup>H} NMR** (126 MHz, CDCl<sub>3</sub>)  $\delta_C$ : 45.0 (t,  $J$  3.3, C(3)H), 74.0 (C(4)H<sub>2</sub>), 88.9 (dd,  $J$  27.9, 24.2, C(2)), 110.7–120.6 (m, CF<sub>2</sub>CF<sub>3</sub>), 122.8 (C(2)ArC(4)), 128.1 (PhC(4)H), 128.4 (d,  $J$  3.1, C(2)ArC(2,6)H), 128.5 (PhC(3,5)H), 129.3 (PhC(2,6)H), 130.9 (C(2)ArC(3,5)H), 132.6 (d,  $J$  3.6, C(2)ArC(1)), 135.2 (PhC(1)); **<sup>19</sup>F NMR** (471 MHz, CDCl<sub>3</sub>)  $\delta_F$ : -126.3 (d,  $J$  278.2, CF<sub>2</sub>), -125.0 (d,  $J$  278.2, CF<sub>2</sub>), -78.8 (CF<sub>3</sub>); **IR** (neat)  $\nu_{max}$  cm<sup>-1</sup>: 1231 (C-O), 1137 (C-O); **HRMS** (APCI<sup>+</sup>) C<sub>17</sub>H<sub>14</sub>NF<sub>5</sub>Br<sup>+</sup> [M-H<sub>2</sub>O+NH<sub>4</sub>]<sup>+</sup> found 406.0222 requires 406.0224 (-0.5 ppm).



### (2*S*,3*R*)-2-(Perfluoroethyl)-3-phenyl-2-(4-(trifluoromethyl)phenyl)oxetane **73**

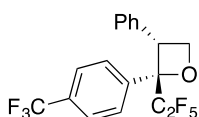

Following General Procedure F, diol **68** (105 mg, 0.25 mmol), NaH (20 mg, 0.50 mmol) and 2,4,6-triisopropylbenzenesulfonyl chloride (67 mg, 0.23 mmol) in THF (12 mL) gave, after Biotage column chromatography (0→3% Et<sub>2</sub>O in hexane), (2*S*,3*R*)-2-(4-bromophenyl)-3-phenyl-2-(trifluoromethyl)oxetane **73** as a colourless oil (115 mg, 98%).

$[\alpha]_D^{20} = +91.6$  (*c* 1.0, CHCl<sub>3</sub>); **Chiral HPLC analysis**, Chiralcel OD-H (97:3 Hexane:IPA, flow rate 1.5 mLmin<sup>-1</sup>, 211 nm, 40 °C) *t*<sub>R</sub>(2*S*,3*R*): 4.2 min, *t*<sub>R</sub>(2*R*,3*S*): 6.0 min, 95:5 er; **<sup>1</sup>H NMR** (500 MHz, CDCl<sub>3</sub>) δ<sub>H</sub>: 4.80 (1H, app t, *J* 6.5, C(4)*H*<sup>A</sup>*H*<sup>B</sup>), 4.87 (1H, dd, *J* 8.5, 6.8, C(3)*H*), 5.18 (1H, dd, *J* 8.5, 6.1, C(4)*H*<sup>A</sup>*H*<sup>B</sup>), 6.93–6.99 (2H, m, PhC(2,6)*H*), 7.07–7.21 (5H, m, PhC(3,4,5)*H* + C(2)ArC(2,6)*H*), 7.34–7.48 (2H, m, C(2)ArC(3,5)*H*); **<sup>13</sup>C{<sup>1</sup>H} NMR** (126 MHz, CDCl<sub>3</sub>) δ<sub>C</sub>: 45.2 (d, <sup>3</sup>*J*<sub>CF</sub> 3.5 C(3)*H*), 74.1 (C(4)*H*<sub>2</sub>), 88.9 (dd, *J* 27.4, 24.6, C(2)), 112.8–121.1 (m, CF<sub>2</sub>CF<sub>3</sub>), 124.0 (d, <sup>1</sup>*J*<sub>CF</sub> 272.3, ArCF<sub>3</sub>) 124.6 (q, <sup>3</sup>*J*<sub>CF</sub> 3.6, C(2)ArC(3,5)*H*), 127.2 (m, C(2)ArC(2,6)*H*), 128.2 (PhC(4)*H*), 128.5 (PhC(3,5)*H*) 129.2 (PhC(2,6)*H*), 130.5 (q, *J* 32.4, C(2)ArC(4)), 134.9 (PhC(1)), 137.6 (C(2)ArC(1)); **<sup>19</sup>F NMR** (471 MHz, CDCl<sub>3</sub>) δ<sub>F</sub>: -126.1 (d, *J* 279, CF<sub>2</sub>), -125.0 (d, *J* 279, CF<sub>2</sub>), -78.8 (CF<sub>2</sub>CF<sub>3</sub>), -62.8 (ArCF<sub>3</sub>); **IR** (neat) ν<sub>max</sub> cm<sup>-1</sup>: 1327 (C-O), 1130 (C-O); **HRMS** could not be obtained.

### (2*S*,3*R*)-2-(4-Bromophenyl)-3-phenyl-2-(trifluoromethyl)oxetane **74**

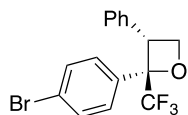

Following General Procedure F, diol **69** (111 mg, 0.30 mmol), NaH (24 mg, 0.60 mmol) and 2,4,6-triisopropylbenzenesulfonyl chloride (79 mg, 0.27 mmol) in THF (15 mL) gave, after Biotage column chromatography (0→3% Et<sub>2</sub>O in hexane), (2*S*,3*R*)-2-(4-bromophenyl)-3-phenyl-2-(trifluoromethyl)oxetane **74** as a colourless oil (115 mg, 98%).

$[\alpha]_D^{20} = +127.8$  (*c* 1.0, CHCl<sub>3</sub>); **Chiral HPLC analysis**, Chiralcel OD-H (97:3 Hexane:IPA, flow rate 1.5 mLmin<sup>-1</sup>, 211 nm, 40 °C) *t*<sub>R</sub>(2*S*,3*R*): 4.1 min, *t*<sub>R</sub>(2*R*,3*S*): 6.7 min, 94:6 er; **<sup>1</sup>H NMR** (500 MHz, CDCl<sub>3</sub>) δ<sub>H</sub>: 4.61 (1H, dd, *J* 8.5, 6.5, C(3)*H*), 4.76 (1H, app t, *J* 6.4, C(4)*H*<sup>A</sup>*H*<sup>B</sup>), 5.19 (1H, dd, *J* 8.5, 6.2, C(4)*H*<sup>A</sup>*H*<sup>B</sup>), 6.87–6.95 (2H, m, C(2)ArC(2,6)*H*), 6.98–7.05 (2H, m, PhC(2,6)*H*), 7.15–7.22 (3H, m, PhC(3,4+5)*H*), 7.27–7.33 (2H, m, C(2)ArC(3,5)*H*); **<sup>13</sup>C{<sup>1</sup>H} NMR** (126 MHz, CDCl<sub>3</sub>) δ<sub>C</sub>: 44.9 (C(3)*H*), 74.1 (C(4)*H*<sub>2</sub>), 88.6 (q, <sup>2</sup>*J*<sub>CF</sub> 30.7, C(2)), 122.8 (C(2)ArC(4)), 124.9 (q, *J* 284.4, CF<sub>3</sub>), 128.1 (PhC(4)*H*), 128.5 (C(2)ArC(2,6)*H*), 128.6 (PhC(3,5)*H*), 129.1 (PhC(2,6)*H*), 131.0 (C(2)ArC(3,5)*H*), 132.7 (PhC(1)), 135.4 (C(2)ArC(1)); **<sup>19</sup>F NMR** (471 MHz, CDCl<sub>3</sub>) δ<sub>F</sub>: -81.6 (CF<sub>3</sub>); **IR** (neat) ν<sub>max</sub> cm<sup>-1</sup>: 1166 (C-O); **HRMS** could not be obtained.

## Epimerisation Studies

i)

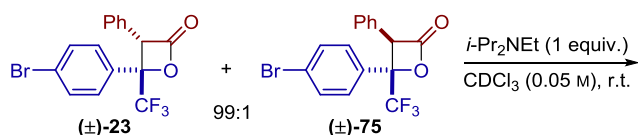

$i\text{-Pr}_2\text{NEt}$  (5  $\mu\text{L}$ , 0.03 mmol) was added to a sample containing both diastereoisomers of 4-(4-bromophenyl)-3-phenyl-4-(trifluoromethyl)oxetan-2-one **23** and **75** (11 mg, 0.03 mmol, 99:1 dr) in  $\text{CDCl}_3$  (0.6 mL) at r.t., and the ratio of **23**:**75** assessed over time by  $^1\text{H}$  NMR spectroscopy. A steady ratio of 90:10 **23**:**75** was attained within 4 h.

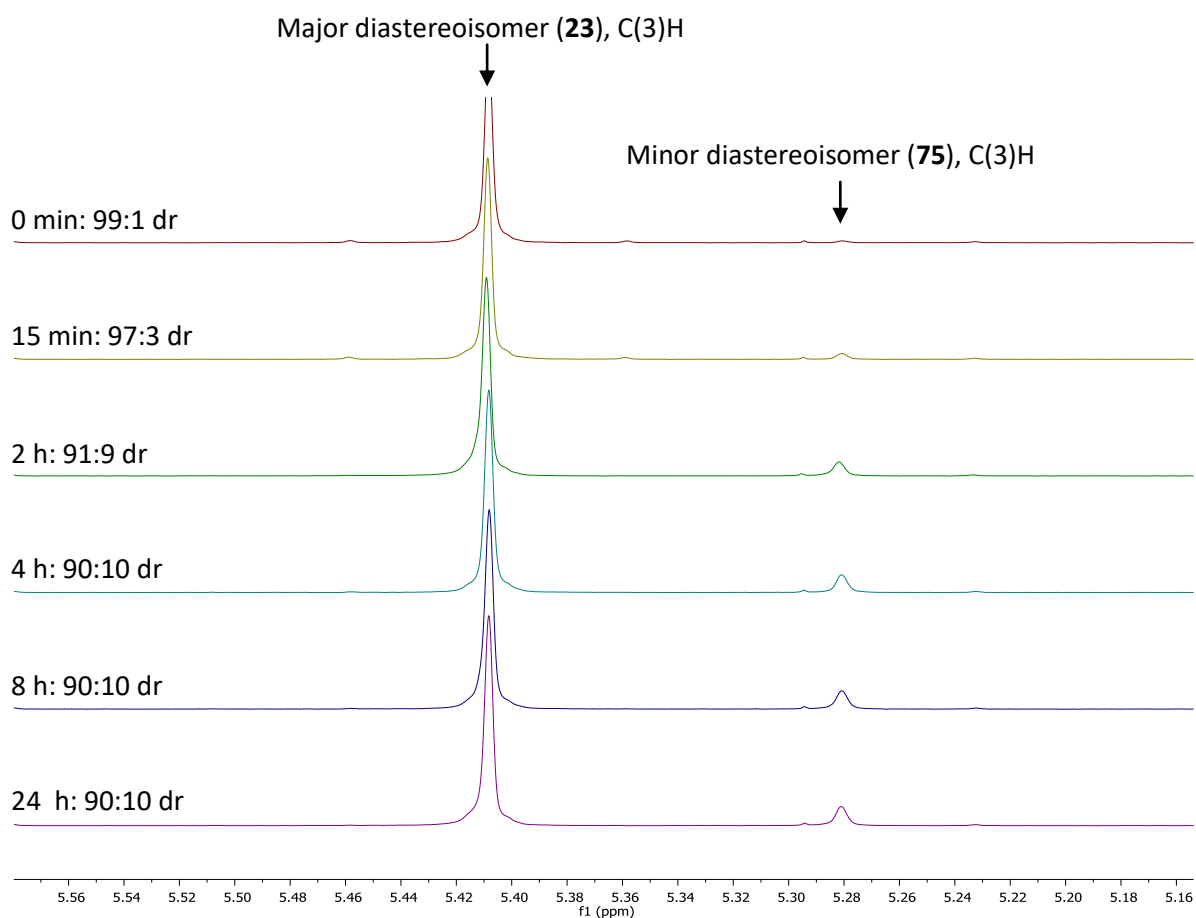

ii)

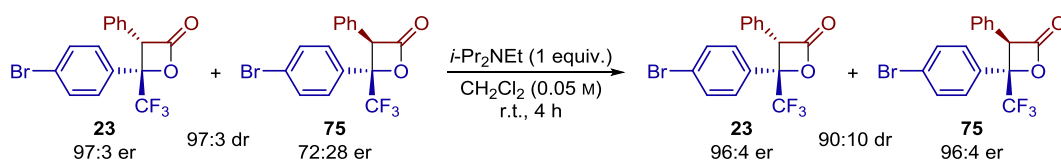

$i\text{-Pr}_2\text{NEt}$  (5  $\mu\text{L}$ , 0.03 mmol) was added to a sample of **23** and **75** (11 mg, 0.03 mmol, 97:3 dr) [obtained from a catalytic reaction using (2*S*,3*R*)-HyperBTM at 90  $^\circ\text{C}$ , in which both diastereoisomers enantioenriched (**23**: 97:3 er; **75**: 72:28 er)] in  $\text{CH}_2\text{Cl}_2$  (0.6 mL) at r.t., and was allowed to stir for 4 h. The reaction was diluted with  $\text{CH}_2\text{Cl}_2$  (5 mL), washed sequentially with 0.1 M HCl (2  $\times$  5 mL) and brine.

The organic layer was dried ( $\text{MgSO}_4$ ), filtered and concentrated *in vacuo* to give 4-(4-bromophenyl)-3-phenyl-4-(trifluoromethyl)oxetan-2-one **23** and **75** in a 90:10 ratio (determined by  $^1\text{H}$  NMR spectroscopy). The enantiomeric ratio of each diastereoisomer was determined by HPLC analysis (Chiralcel OD-H, 97:3 Hexane:IPA, flow rate  $1.5\text{ mLmin}^{-1}$ , 211 nm,  $40\text{ }^\circ\text{C}$ ):

#### HPLC analysis prior to epimerisation with *i*-Pr<sub>2</sub>NEt:

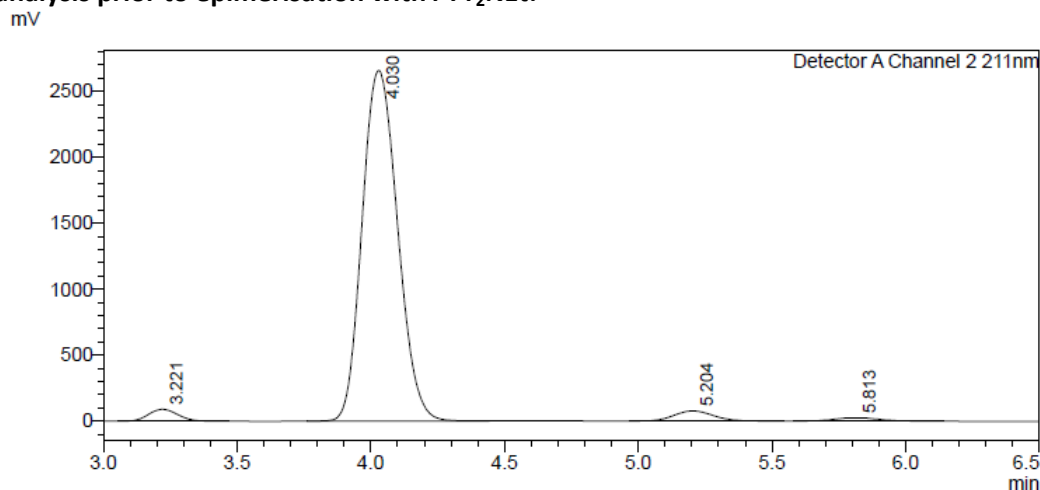

#### <Peak Table>

| Detector A Channel 2 211nm |           |         |
|----------------------------|-----------|---------|
| Peak#                      | Ret. Time | Area%   |
| 1                          | 3.221     | 2.625   |
| 2                          | 4.030     | 93.137  |
| 3                          | 5.204     | 3.049   |
| 4                          | 5.813     | 1.189   |
| Total                      |           | 100.000 |

**23:**  $t_R(3R,4R)$ : 3.2 min,  $t_R(3S,4S)$ : 4.0 min, 3:97 er

**75:**  $t_R(3R,4S)$ : 5.2 min,  $t_R(3S,4R)$ : 5.8 min, 72:28 er

#### HPLC analysis after epimerisation with *i*-Pr<sub>2</sub>NEt:

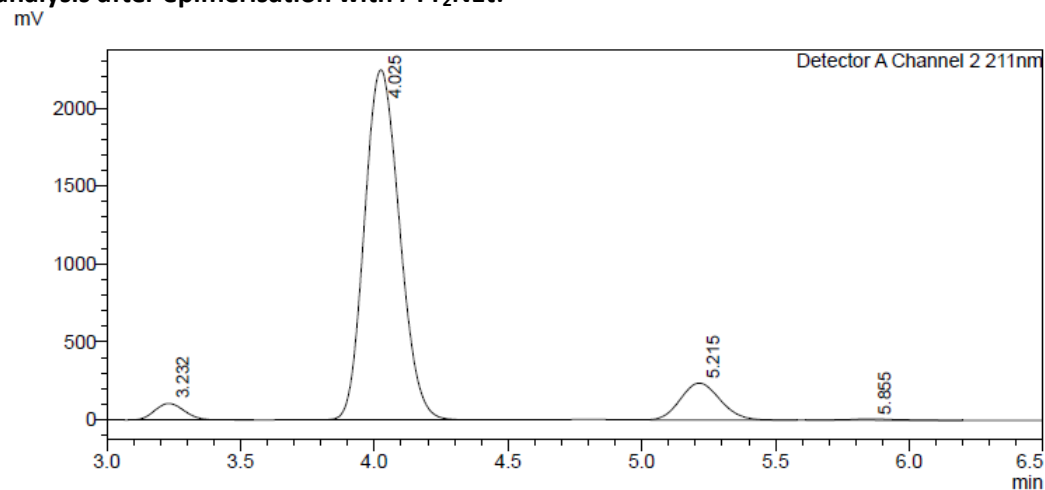

#### <Peak Table>

| Detector A Channel 2 211nm |           |         |
|----------------------------|-----------|---------|
| Peak#                      | Ret. Time | Area%   |
| 1                          | 3.232     | 3.438   |
| 2                          | 4.025     | 85.851  |
| 3                          | 5.215     | 10.320  |
| 4                          | 5.855     | 0.390   |
| Total                      |           | 100.000 |

**23:**  $t_R(3R,4R)$ : 3.2 min,  $t_R(3S,4S)$ : 4.0 min, 4:96 er

**75:**  $t_R(3R,4S)$ : 5.2 min,  $t_R(3S,4R)$ : 5.9 min, 96:4 er

Following epimerisation, enhancement of the stereoisomer with a retention time of 5.2 min was observed. Assuming this increase in the amount of this stereoisomer is due to epimerisation of the major (3*S*,4*S*) stereoisomer at C(3) indicates this stereoisomer has a (3*R*,4*S*) configuration. This confirms that the major enantiomer of the minor diastereoisomer isolated from the catalytic reaction has a (3*R*,4*S*) configuration. This configuration at C(3) is the opposite to that which is usually expected for products formed under the control of the isothiourea catalyst. In combination with the fact that the dr of the product isolated from the isothiourea-catalysed reaction (90:10) is equal to the thermodynamically-favoured ratio, it is therefore likely that the inherent dr of the reaction is significantly higher, with epimerisation of the major (3*S*,4*S*) stereoisomer leading to formation of the (3*R*,4*S*) stereoisomer and resulting in a reduction in the dr of the isolated product.

An approximation of the abundance of each stereoisomer prior to, and after, the epimerisation experiment is given below, which may aid visualisation of how the er of the minor diastereoisomer is enhanced through this process.

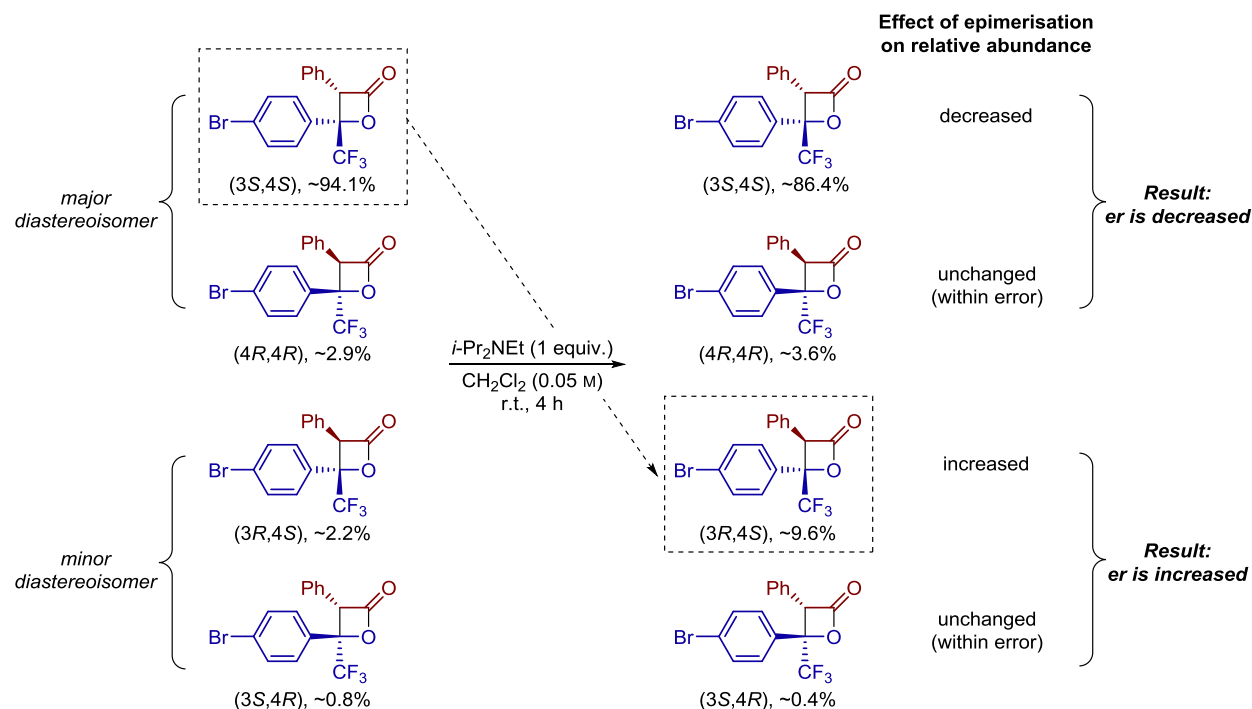

iii)

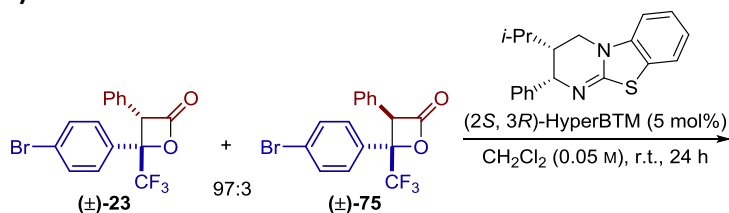

To investigate the possibility of product epimerisation using the chiral isothiourethane catalyst leading to a kinetic resolution, *(2S, 3R)*-HyperBTM (0.5 mg, 0.0015 mmol) was added to a racemic sample of both diastereoisomers of 4-(4-bromophenyl)-3-phenyl-4-(trifluoromethyl)oxetan-2-one **23** and **75** (11 mg, 0.03 mmol, 97:3 dr) in  $\text{CH}_2\text{Cl}_2$  (0.6 mL) at r.t. and allowed to stir for 24 h. The reaction was diluted with  $\text{CH}_2\text{Cl}_2$  (5 mL), washed sequentially with 0.1 M HCl ( $2 \times 5$  mL) and brine. The organic layer was dried ( $\text{MgSO}_4$ ), filtered and concentrated *in vacuo* to give 4-(4-bromophenyl)-3-phenyl-4-(trifluoromethyl)oxetan-2-one **23** and **75** in a 90:10 ratio (determined by  $^1\text{H}$  NMR spectroscopy). The enantiomeric ratio of each diastereoisomer was determined by HPLC analysis using a chiral support (Chiralcel OD-H, 97:3 Hexane:IPA, flow rate  $1.5 \text{ mL min}^{-1}$ , 211 nm,  $40^\circ\text{C}$ ):

#### HPLC analysis prior to epimerisation with *(2S, 3R)*-HyperBTM:

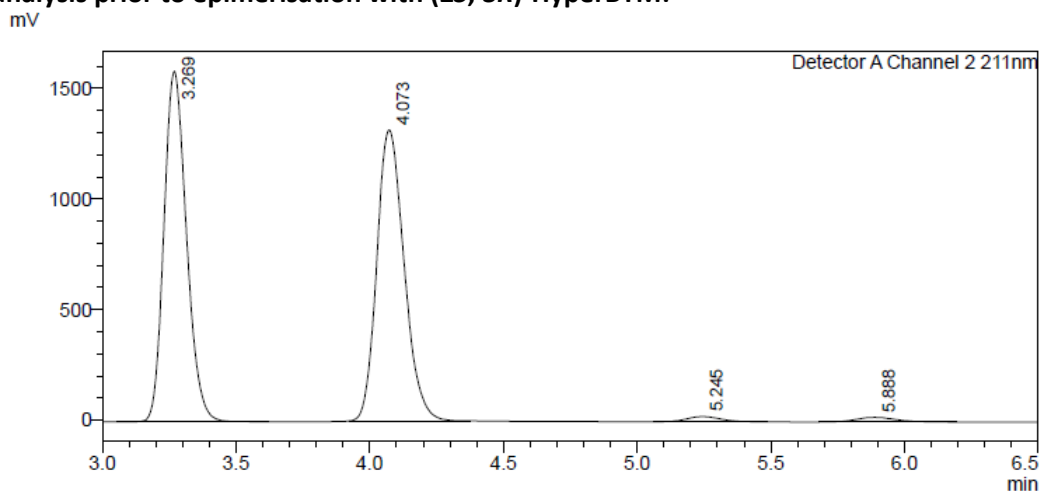

#### <Peak Table>

| Detector A Channel 2 211nm |           |         |
|----------------------------|-----------|---------|
| Peak#                      | Ret. Time | Area%   |
| 1                          | 3.269     | 48.691  |
| 2                          | 4.073     | 49.034  |
| 3                          | 5.245     | 1.142   |
| 4                          | 5.888     | 1.134   |
| Total                      |           | 100.000 |

**23**:  $t_{\text{R}}(3\text{R},4\text{R})$ : 3.2 min,  $t_{\text{R}}(3\text{S},4\text{S})$ : 4.1 min, 50:50 er

**75**:  $t_{\text{R}}(3\text{R},4\text{S})$ : 5.2 min,  $t_{\text{R}}(3\text{S},4\text{R})$ : 5.9 min, 50:50 er

### HPLC analysis after 24 h epimerisation with (2*S*, 3*R*)-HyperBTM:

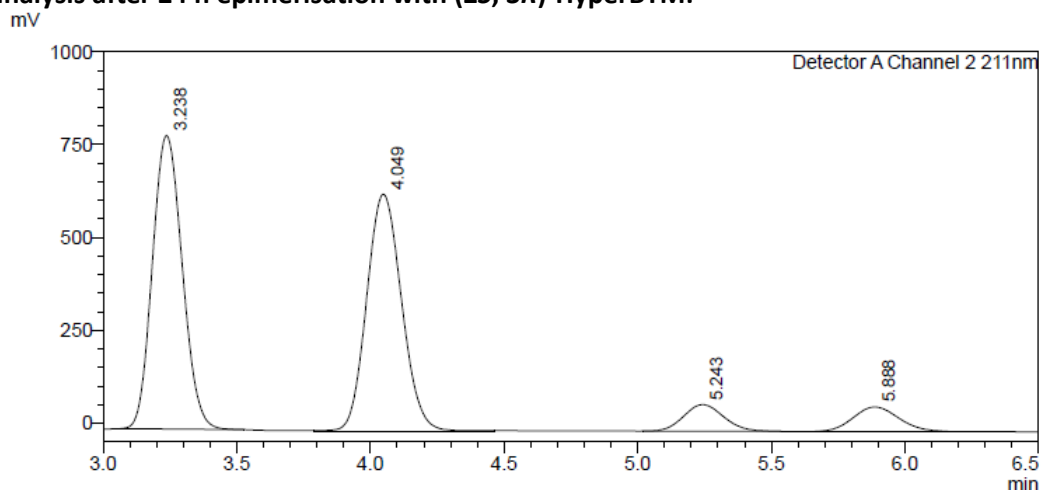

#### <Peak Table>

| Detector A Channel 2 211nm |           |         |
|----------------------------|-----------|---------|
| Peak#                      | Ret. Time | Area%   |
| 1                          | 3.238     | 45.549  |
| 2                          | 4.049     | 43.005  |
| 3                          | 5.243     | 5.620   |
| 4                          | 5.888     | 5.825   |
| Total                      |           | 100.000 |

**23:**  $t_R(3R,4R)$ : 3.2 min,  $t_R(3S,4S)$ : 4.0 min, 51:49 er

**75:**  $t_R(3R,4S)$ : 5.2 min,  $t_R(3S,4R)$ : 5.9 min, 49:51 er

Only minimal enantioenrichment of each diastereoisomer was observed, indicating that a kinetic resolution process may be operative, but is unlikely to play a significant role in determining the distribution of stereoisomers obtained from the catalytic reaction.

## Thermal Stability of $\beta$ -Lactones 21–23

To test the thermal stability of the  $\beta$ -lactone products, samples of  $\beta$ -lactones **21–23** were dissolved in  $d_6$ -DMSO and, in an NMR tube, heated for various periods of time. After heating each sample sequentially at 70 °C, 100 °C and 120 °C for 2 h each no decomposition was observed. Upon heating at 140 °C some decomposition was observed in each case after 2 h, and therefore heating was continued at this temperature until the majority of the compound had undergone decomposition. The rate of decomposition was assessed through integration of the C(3) proton of each diastereoisomer of  $\beta$ -lactone (in example below at 6.45 ppm and 6.25 ppm) and compared to the total integration of the aromatic region. An example showing the decomposition of  $C_4F_9$ -substituted  $\beta$ -lactone **21** is given below:

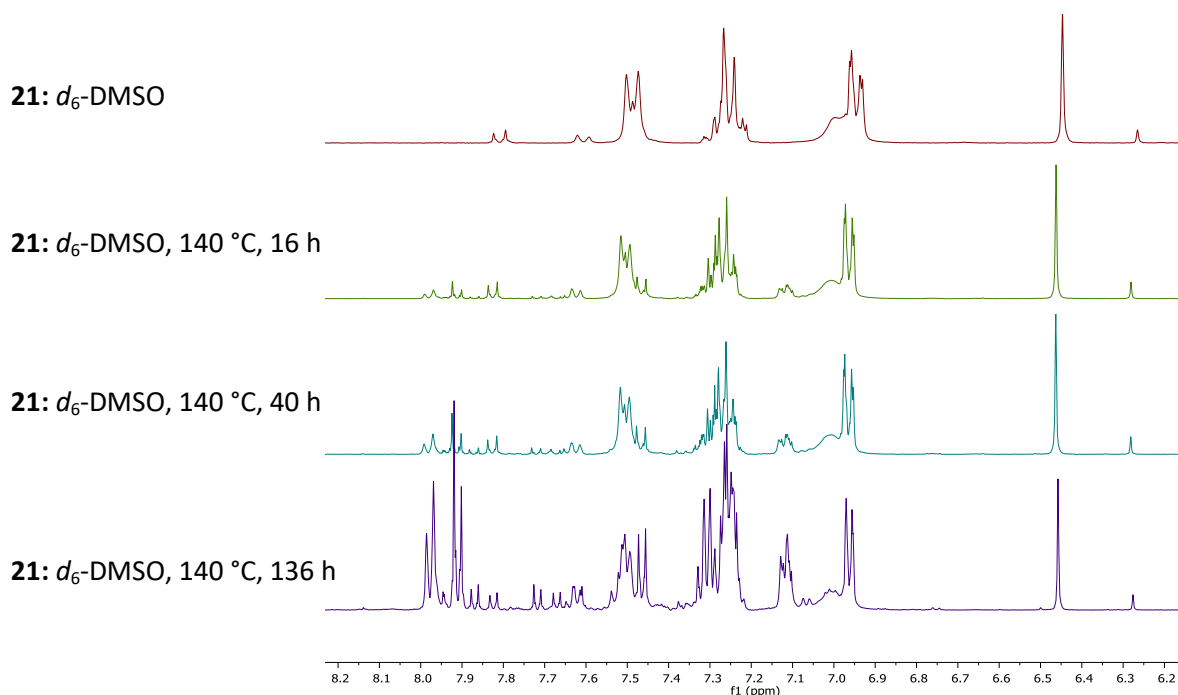

Approximate half-lives for each compound at 140 °C were calculated by plotting decomposition over time and fitting an exponential decay function:

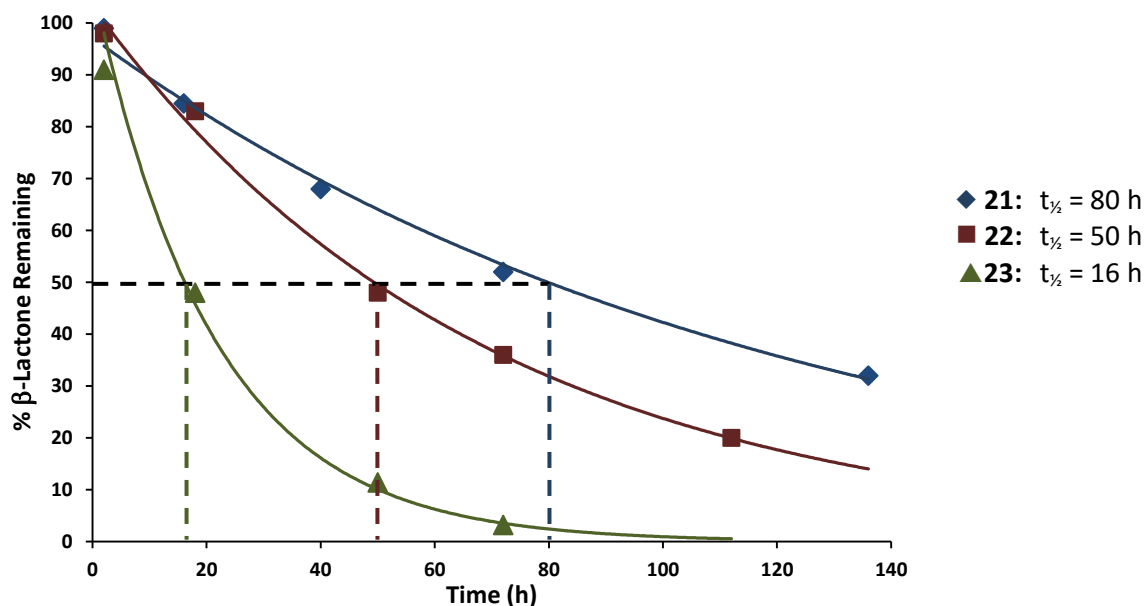

## Determination of $^{13}\text{C}$ KIEs at Natural Abundance

### i) Preparation of standard sample

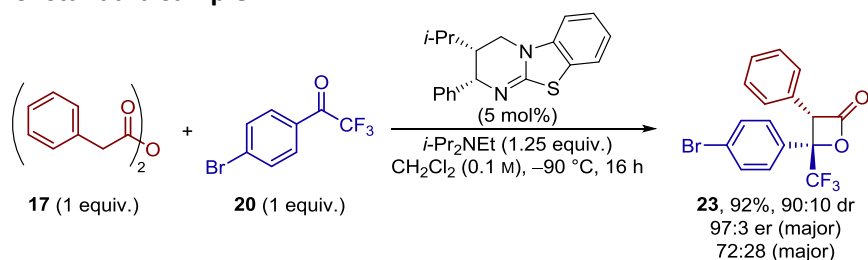

(2*S*,3*R*)-HyperBTM (12 mg, 0.038 mmol) and *i*-Pr<sub>2</sub>NEt (163  $\mu\text{L}$ , 0.94 mmol) were added to a solution of 1-(4-bromophenyl)-2,2,2-trifluoroethan-1-one **20** (191 mg, 0.75 mmol) and phenylacetic anhydride **17** (190 mg, 0.75 mmol) in CH<sub>2</sub>Cl<sub>2</sub> (7.5 mL) at  $-90^\circ\text{C}$  under a nitrogen atmosphere, and the mixture was allowed to stir for 16 h. The reaction mixture was diluted with CH<sub>2</sub>Cl<sub>2</sub> (15 mL), 0.1 M HCl (15 mL) was added, and the layers separated. The aqueous layer was extracted with CH<sub>2</sub>Cl<sub>2</sub> (15 mL) and the combined organic layers were washed sequentially with 0.1 M HCl (15 mL) and brine (15 mL), dried (MgSO<sub>4</sub>) and concentrated *in vacuo* to give, after purification by Biotage column chromatography (0 $\rightarrow$ 3% Et<sub>2</sub>O in hexane), (3*S*,4*S*)-4-(4-bromophenyl)-3-phenyl-4-(trifluoromethyl)oxetan-2-one **23** as a colourless oil (256 mg, 0.69 mmol, 92%) as an inseparable mixture of diastereoisomers [97:3 dr (crude dr = 90:10)].

### ii) Preparation of sample at low conversion to assess isotopic composition at C(2) and C(3)

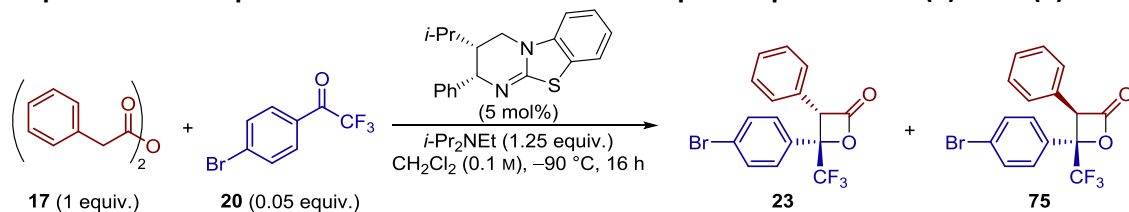

(2*S*,3*R*)-HyperBTM (184 mg, 0.6 mmol) and *i*-Pr<sub>2</sub>NEt (2.6 mL, 0.94 mmol) were added to a solution of 1-(4-bromophenyl)-2,2,2-trifluoroethan-1-one (152 mg, 0.6 mmol) and phenylacetic anhydride (3.05 g, 12 mmol) in CH<sub>2</sub>Cl<sub>2</sub> (120 mL) at  $-90^\circ\text{C}$  under a nitrogen atmosphere, and the mixture was allowed to stir for 16 h. 0.1 M HCl (250 mL) was added and the mixture allowed to warm to r.t. The layers separated and the aqueous layer was extracted with CH<sub>2</sub>Cl<sub>2</sub> (2  $\times$  50 mL) and the combined organic layers washed sequentially with 0.1 M HCl (50 mL) and brine (50 mL), dried (MgSO<sub>4</sub>) and concentrated *in vacuo* to give the crude reaction product mixture. This residue was completely dissolved in CDCl<sub>3</sub>, 1,2-dimethoxyethane (125  $\mu\text{L}$ , 1.2 mmol) was added as an internal standard, and a sample was taken for analysis by <sup>1</sup>H NMR spectroscopy. The reaction conversion was assessed integrating the C(3)H proton of both diastereoisomers, and comparing the integration to that of the internal standard. Purification of the crude reaction product was performed by Biotage column



chromatography (0→3% Et<sub>2</sub>O in hexane) to give (3*S*,4*S*)-4-(4-bromophenyl)-3-phenyl-4-(trifluoromethyl)oxetan-2-one as a colourless oil as an inseparable mixture of diastereoisomers.

| Expt. number | Conversion <sup>a,b</sup> | Isolated yield <sup>b</sup> | Isolated dr (23:75) |
|--------------|---------------------------|-----------------------------|---------------------|
| 1            | 3.9%                      | 102 mg, 2.3%                | 93:7                |
| 2            | 3.8%                      | 124 mg, 2.8%                | 90:10               |
| 3            | 3.6%                      | 91 mg, 2.0%                 | 90:10               |

<sup>a</sup> Determined by <sup>1</sup>H NMR spectroscopic analysis using 1,2-dimethoxyethane as an internal standard.

<sup>b</sup> Reaction conversion and yield given relative to the amount of anhydride used. For example, 3.9% = 12 mmol × 0.039 = 0.47 mmol.

### Determination of T1 relaxation times

T1 relaxation time determination was performed using the inversion-recovery method for (3*S*,4*S*)-4-(4-bromophenyl)-3-phenyl-4-(trifluoromethyl)oxetan-2-one using a 93:7 mixture of diastereoisomers of **23** and **75** (180 mg, 0.49 mmol) in CDCl<sub>3</sub> (0.6 mL) at r.t. T1 relaxation times were only calculated for the major diastereoisomer **23**.

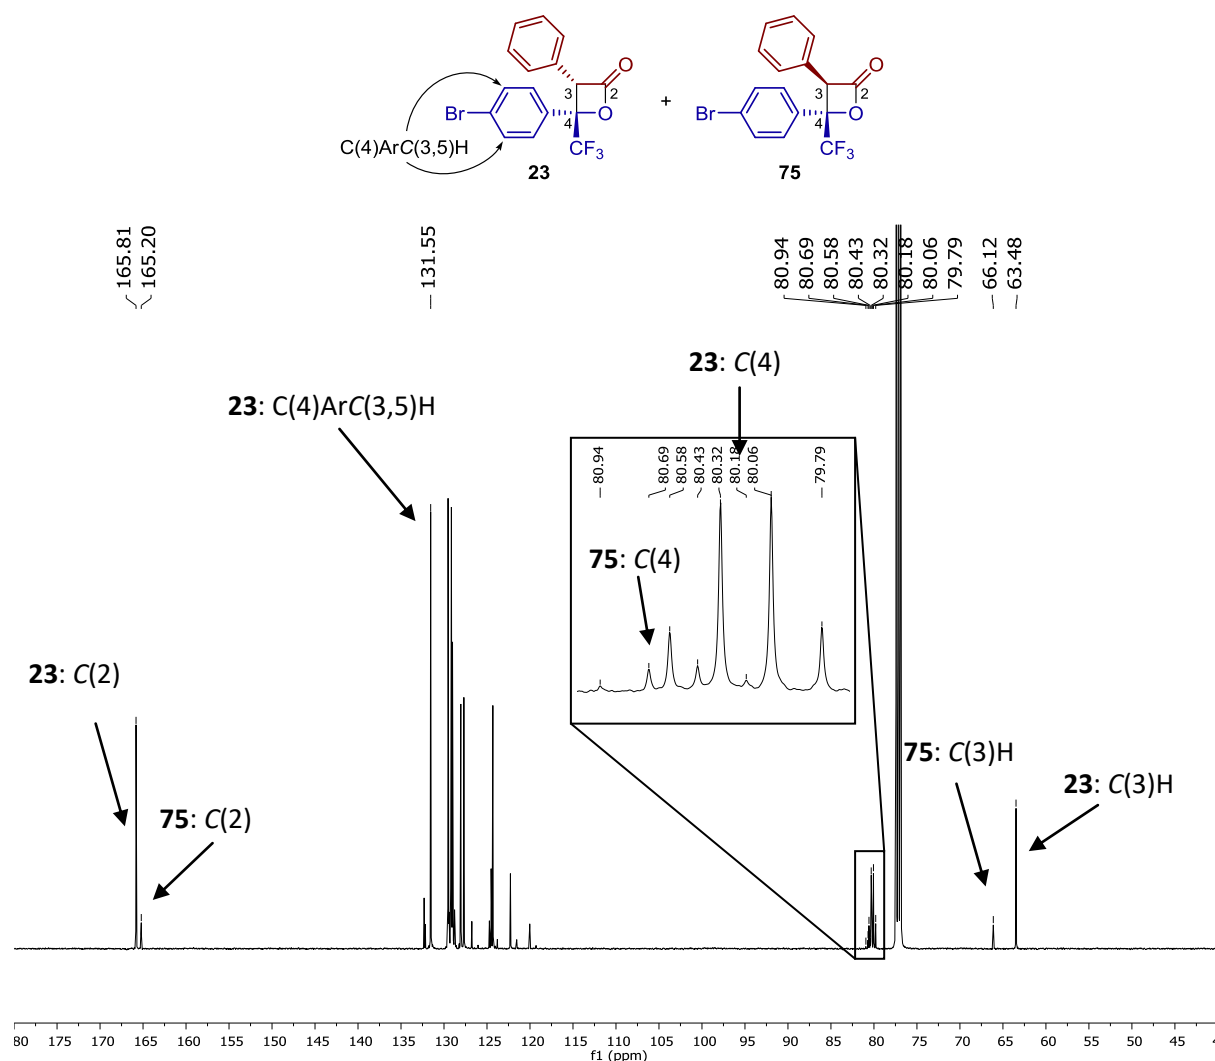

Based on the overlap of the C(4) signals for the two diastereoisomers, the natural abundance KIE for this carbon was not calculated, with the T1 relaxation time data given below purely for reference.

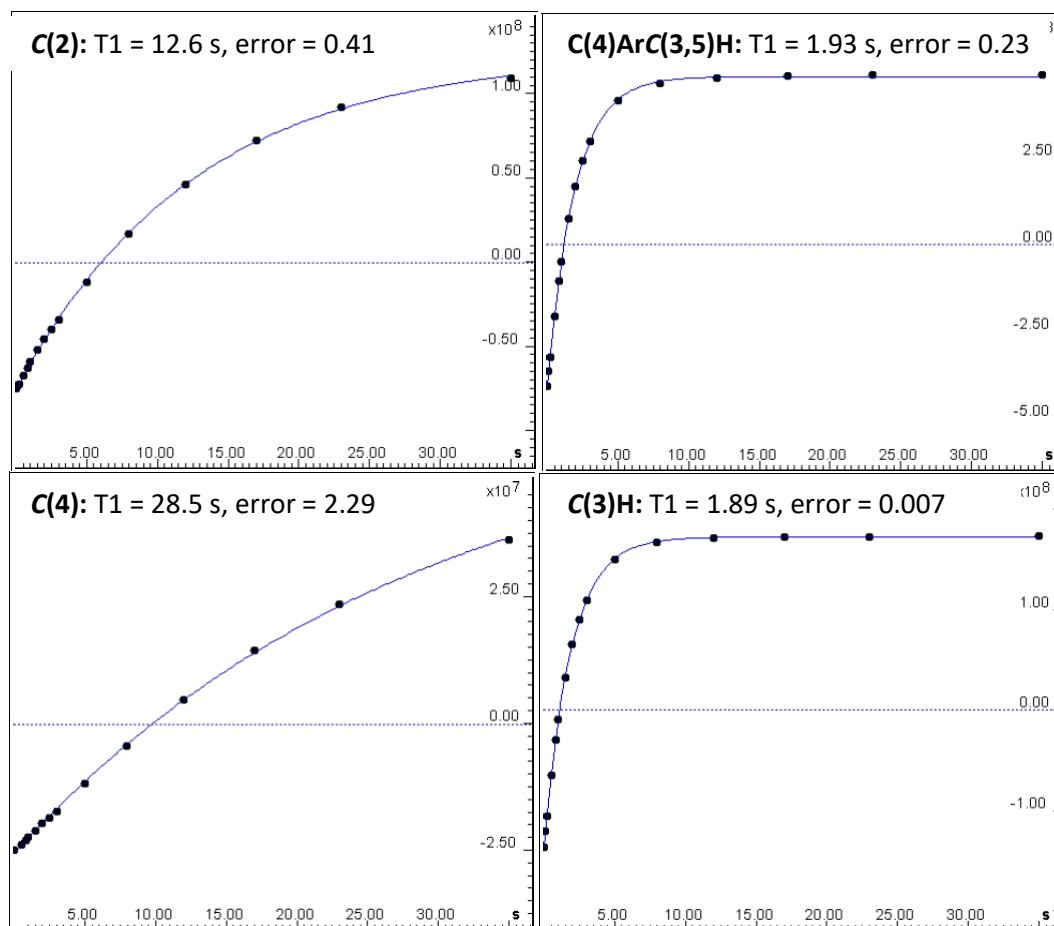

Quantitative  $^{13}\text{C}$  NMR spectra used for natural abundance KIE calculation were therefore conducted with a D1 delay of 101 s, as this is equal to 8 times the T1 relaxation time of C(2) (the carbon with the longest T1 of those being used in the subsequent calculations).

### Calculation of $^{13}\text{C}$ KIEs at natural abundance

$^{13}\text{C}$  NMR spectra were recorded using a Bruker Avance II 500 spectrometer equipped with a CryoProbe Prodigy BBO probe, with inverse gated decoupling, 101 s delays between pulses, at a controlled temperature of 25 °C, collecting 64K points and using a spectral width of 29700 Hz.

Five quantitative  $^{13}\text{C}$  NMR spectra were obtained for the standard sample. For each spectra, manual phase and baseline corrections were performed in MestReNova, and the signal corresponding to the C(4)ArC(3,5)H carbon was integrated and set to 1000. The signals for the C(2) and C(3) carbon were integrated in each spectra, and the mean and standard deviation calculated for each set. Using the inbuilt MestReNova script tool, the signal to noise ratio was calculated as > 500 in each case.

### Standard Sample

|              | 1      | 2      | 3      | 4      | 5      | Mean    | St. dev. |
|--------------|--------|--------|--------|--------|--------|---------|----------|
| <b>C(2)</b>  | 478.05 | 482.28 | 481.21 | 484.26 | 487.92 | 482.744 | 3.663718 |
| <b>C(3)H</b> | 486.65 | 487.45 | 484.79 | 484.84 | 480.23 | 484.792 | 2.798718 |

Five quantitative <sup>13</sup>C NMR spectra were next obtained for each of the three experiments conducted to low conversion. For each spectra, manual phase and baseline corrections were performed in MestReNova, and the signal corresponding to the C(4)ArC(3,5)H carbon was integrated and set to 1000. The signals for the C(2) and C(3) carbon were integrated in each spectra, and the mean and standard deviation calculated for each set.

### C(2)

|         | 1      | 2      | 3      | 4      | 5      | Mean    | St. dev. | R/R <sub>0</sub> | ΔR/R <sub>0</sub> | F     | ΔF   | KIE <sub>calc</sub> | ΔKIE <sub>F</sub> | ΔKIE <sub>R</sub> | ΔKIE     |
|---------|--------|--------|--------|--------|--------|---------|----------|------------------|-------------------|-------|------|---------------------|-------------------|-------------------|----------|
| Expt. 1 | 475.48 | 478.17 | 472.96 | 474.93 | 473.22 | 474.952 | 2.097777 | 0.983859         | 0.008639          | 0.039 | 0.01 | 1.016737            | 0.002117          | 0.001733          | 0.002736 |
| Expt. 2 | 467.76 | 476.86 | 473.38 | 475.34 | 479.04 | 474.476 | 4.288529 | 0.982873         | 0.0116            | 0.038 | 0.01 | 1.017767            | 0.002256          | 0.001917          | 0.002961 |
| Expt. 3 | 479.88 | 475.76 | 475.28 | 472.82 | 476.85 | 476.118 | 2.568836 | 0.986274         | 0.009184          | 0.036 | 0.01 | 1.014175            | 0.002144          | 0.001641          | 0.0027   |

### C(3)H

|         | 1      | 2      | 3      | 4      | 5      | Mean    | St. dev. | R/R <sub>0</sub> | ΔR/R <sub>0</sub> | F     | ΔF   | KIE <sub>calc</sub> | ΔKIE <sub>F</sub> | ΔKIE <sub>R</sub> | ΔKIE     |
|---------|--------|--------|--------|--------|--------|---------|----------|------------------|-------------------|-------|------|---------------------|-------------------|-------------------|----------|
| Expt. 1 | 484.58 | 479.49 | 482.98 | 482.04 | 488.12 | 483.442 | 3.200628 | 0.997215         | 0.00876           | 0.039 | 0.01 | 1.002849            | 0.002123          | 0.001743          | 0.002747 |
| Expt. 2 | 486.62 | 480.23 | 483.08 | 481.32 | 485.91 | 483.432 | 2.79021  | 0.997195         | 0.00814           | 0.038 | 0.01 | 1.002868            | 0.002091          | 0.001647          | 0.002662 |
| Expt. 3 | 484.73 | 482.25 | 485.67 | 483.04 | 485.21 | 484.18  | 1.46697  | 0.998738         | 0.006512          | 0.036 | 0.01 | 1.001287            | 0.001998          | 0.001426          | 0.002455 |

Where,  $R/R_0$  = mean of the sample/mean of the standard

$$\Delta(R/R_0) = R/R_0 \times [(st. dev. of sample/mean of sample)^2 + (st. dev. of standard/mean of standard)^2]^{0.5}$$

F = reaction conversion as a fraction of 1

ΔF = estimated error in conversion

$$KIE_{calc} = \frac{\ln(1-F)}{\ln[(1-F)R/R_0]}$$

$$\Delta KIE_F = \frac{-\ln(R/R_0)}{(1-F)\ln^2[(1-F)R/R_0]} \times \Delta F$$

$$\Delta KIE_R = \frac{-\ln(1-F)}{(R/R_0)\ln^2[(1-F)R/R_0]} \times \Delta(R/R_0)$$

$$\Delta KIE = KIE_{calc} \times [(\Delta KIE_R/KIE_{calc})^2 + (\Delta KIE_F/KIE_{calc})^2]^{0.5}$$

## X-Ray Crystallographic Details

Data were recorded at 93 K on a Rigaku XtaLAB P200 diffractometer using multi-layer mirror monochromated Mo-K $\alpha$  radiation.

### (3S,4S)-47

|                                                             |                                                                  |
|-------------------------------------------------------------|------------------------------------------------------------------|
| CCDC                                                        | 1886142                                                          |
| empirical formula                                           | C <sub>19</sub> H <sub>15</sub> BrF <sub>5</sub> NO <sub>2</sub> |
| fw                                                          | 464.23                                                           |
| crystal description                                         | colourless prism                                                 |
| space group                                                 | <i>P</i> 2 <sub>1</sub> (No. 4)                                  |
| <i>a</i> [Å]                                                | 11.753(6)                                                        |
| <i>b</i> [Å]                                                | 6.281(3)                                                         |
| <i>c</i> [Å]                                                | 13.273(6)                                                        |
| $\beta$ [°]                                                 | 101.939(9)                                                       |
| vol [Å] <sup>3</sup>                                        | 958.6(8)                                                         |
| <i>Z</i>                                                    | 2                                                                |
| reflns collected                                            | 10431                                                            |
| independent reflns ( <i>R</i> <sub>int</sub> )              | 3443 (0.0639)                                                    |
| <i>R</i> <sub>1</sub> [ <i>I</i> > 2 $\sigma$ ( <i>I</i> )] | 0.0343                                                           |
| <i>wR</i> <sub>2</sub> (all data)                           | 0.0626                                                           |
| Flack parameter                                             | -0.016(9)                                                        |

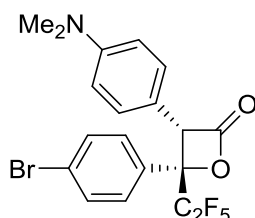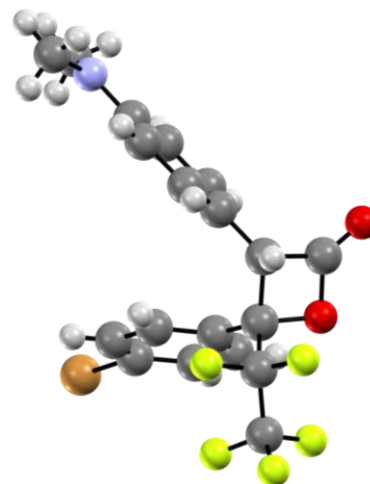

### (3S,4S)-53

|                                                             |                                                                  |
|-------------------------------------------------------------|------------------------------------------------------------------|
| CCDC                                                        | 1886144                                                          |
| empirical formula                                           | C <sub>18</sub> H <sub>15</sub> BrF <sub>3</sub> NO <sub>2</sub> |
| fw                                                          | 414.22                                                           |
| crystal description                                         | colourless prism                                                 |
| space group                                                 | <i>P</i> 2 <sub>1</sub> 2 <sub>1</sub> 2 <sub>1</sub> (No. 19)   |
| <i>a</i> [Å]                                                | 9.2685(13)                                                       |
| <i>b</i> [Å]                                                | 17.886(3)                                                        |
| <i>c</i> [Å]                                                | 21.589(3)                                                        |
| vol [Å] <sup>3</sup>                                        | 3578.9(9)                                                        |
| <i>Z</i>                                                    | 8                                                                |
| reflns collected                                            | 20510                                                            |
| independent reflns ( <i>R</i> <sub>int</sub> )              | 6593 (0.0536)                                                    |
| <i>R</i> <sub>1</sub> [ <i>I</i> > 2 $\sigma$ ( <i>I</i> )] | 0.0400                                                           |
| <i>wR</i> <sub>2</sub> (all data)                           | 0.0704                                                           |
| Flack parameter                                             | -0.003(6)                                                        |

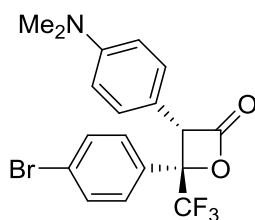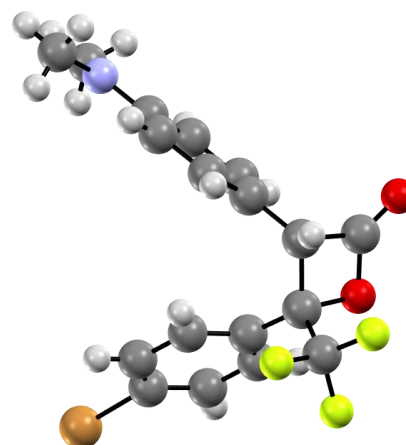

### (2S,3S)-60

|                                                             |                                                                  |
|-------------------------------------------------------------|------------------------------------------------------------------|
| CCDC                                                        | 1886143                                                          |
| empirical formula                                           | C <sub>26</sub> H <sub>19</sub> BrF <sub>9</sub> NO <sub>2</sub> |
| fw                                                          | 628.33                                                           |
| crystal description                                         | colourless prism                                                 |
| space group                                                 | <i>P</i> 2 <sub>1</sub> 2 <sub>1</sub> 2 <sub>1</sub> (No. 19)   |
| <i>a</i> [Å]                                                | 13.6483(15)                                                      |
| <i>b</i> [Å]                                                | 16.5846(18)                                                      |
| <i>c</i> [Å]                                                | 23.807(3)                                                        |
| vol [Å] <sup>3</sup>                                        | 5388.8(11)                                                       |
| <i>Z</i>                                                    | 8                                                                |
| reflns collected                                            | 23697                                                            |
| independent reflns ( <i>R</i> <sub>int</sub> )              | 9651 (0.0410)                                                    |
| <i>R</i> <sub>1</sub> [ <i>I</i> > 2 $\sigma$ ( <i>I</i> )] | 0.0404                                                           |
| <i>wR</i> <sub>2</sub> (all data)                           | 0.0784                                                           |
| Flack parameter                                             | -0.007(5)                                                        |

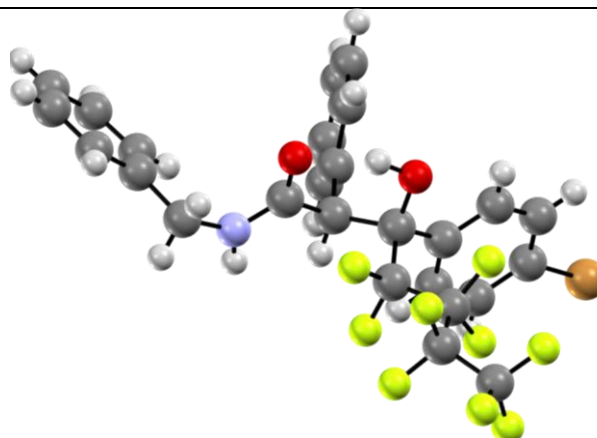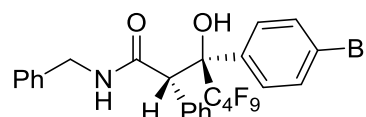

## Computational Details

### i) Complete Authorship of Gaussian 09

Gaussian 09, Revision **D.01**, M. J. Frisch, G. W. Trucks, H. B. Schlegel, G. E. Scuseria, M. A. Robb, J. R. Cheeseman, G. Scalmani, V. Barone, G. A. Petersson, H. Nakatsuji, X. Li, M. Caricato, A. Marenich, J. Bloino, B. G. Janesko, R. Gomperts, B. Mennucci, H. P. Hratchian, J. V. Ortiz, A. F. Izmaylov, J. L. Sonnenberg, D. Williams-Young, F. Ding, F. Lipparini, F. Egidi, J. Goings, B. Peng, A. Petrone, T. Henderson, D. Ranasinghe, V. G. Zakrzewski, J. Gao, N. Rega, G. Zheng, W. Liang, M. Hada, M. Ehara, K. Toyota, R. Fukuda, J. Hasegawa, M. Ishida, T. Nakajima, Y. Honda, O. Kitao, H. Nakai, T. Vreven, K. Throssell, J. A. Montgomery, Jr., J. E. Peralta, F. Ogliaro, M. Bearpark, J. J. Heyd, E. Brothers, K. N. Kudin, V. N. Staroverov, T. Keith, R. Kobayashi, J. Normand, K. Raghavachari, A. Rendell, J. C. Burant, S. S. Iyengar, J. Tomasi, M. Cossi, J. M. Millam, M. Klene, C. Adamo, R. Cammi, J. W. Ochterski, R. L. Martin, K. Morokuma, O. Farkas, J. B. Foresman, and D. J. Fox, Gaussian, Inc., Wallingford CT, 2016.

### ii) General Computational Procedure

The following section describes the methodology for identifying the nature of the potential energy surface for the lactonisation step reported in the manuscript (Section 2.3.1). Manual, exhaustive conformation searches were performed to locate all relevant structures. All conformers were optimized using the Gaussian 09 computational package (see above reference). The stepwise aldol/lactonisation process was located with the M06-2X<sup>5</sup>/6-31G(d)<sup>6</sup> level of theory with implicit solvent modelled using PCM (Polarizable Continuum Model)<sup>7</sup> for dichloromethane. The concerted [2+2] process was located with the PBE<sup>8</sup>/6-31G(d) with implicit solvent modelled using PCM for dichloromethane. Minima were confirmed at both levels of theory with vibrational frequency calculations, with ground states not having imaginary frequencies and transition states (TSs) having one imaginary vibrational frequency. The potential energy surfaces were generated for both levels of theory by fixing the distance between the nucleophilic carbon of the HBTM-enolate complex and the electrophilic carbon of the ketone (CC bond) and varying distances corresponding to the second forming  $\sigma$ -bond (CO bond).

The following section describes the methodology for the computed catalytic cycle reported in the manuscript (Section 2.3.3). Manual, exhaustive conformation searches were performed to locate all relevant structures. All conformers were optimized using the Gaussian 09 computational package (see above reference) using PBE/6-31G(d) with implicit solvent modelled using PCM (Polarizable Continuum

Model) for dichloromethane. Minima were confirmed with vibrational frequency calculations computed at  $-90\text{ }^{\circ}\text{C}$ , with transition states having one imaginary vibrational frequency. Single point electronic energies were obtained at the PBE/6-311++G(2df,p) level of theory with implicit solvent modelled as before. Final free energies were calculated by adding the single point energies and the thermal correction to Gibbs free energy obtained from vibration frequency calculations. All 3D structure images were rendered in CYLview visualization software.<sup>9</sup>

### iii) Temperature Effects on Rate-Limiting Step

Initial reaction optimisation conditions were at room temperature (Table 1, entry 8). To match experiments, we initially computed the reaction coordinate diagram at  $25\text{ }^{\circ}\text{C}$  (Figure S1). Under these conditions, the concerted [2+2] **TS-E** is the rate-limiting step (RLS) for the concerted PBE mechanism while the C–C bond forming **TS-I** is rate-limiting for the stepwise M06-2X mechanism. After reaction optimisation for kinetic isotope effect (KIE) experiments (Scheme 5), we recomputed the reaction coordinate diagrams at  $-90\text{ }^{\circ}\text{C}$  to match experimental conditions. Even at the lower temperature, **TS-E** is the RLS for the concerted PBE mechanism. However, deprotonation **TS-C** is the RLS for the stepwise M06-2X mechanism. The RLSs at  $-90\text{ }^{\circ}\text{C}$  were used in the KIE calculations.

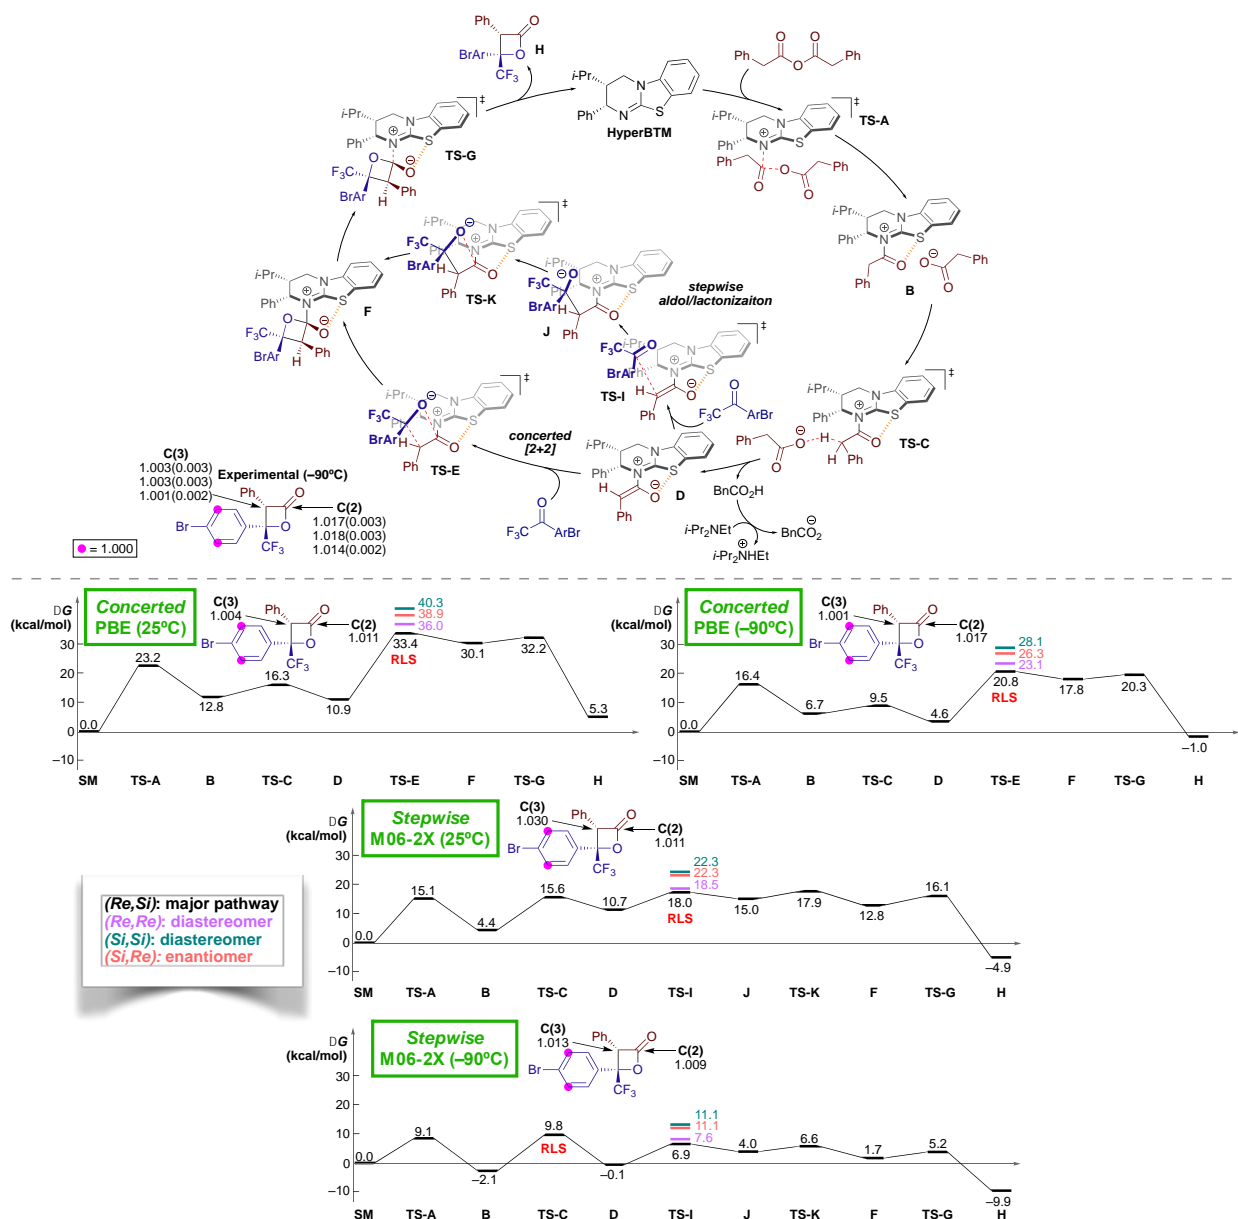

**Figure S1.** Rate-limiting steps (RLSs) for concerted and stepwise mechanisms at 25 °C and -90 °C. The concerted [2+2] **TS-E** is rate-limiting at both temperatures for the concerted mechanism. The C-C bond forming **TS-I** is rate-limiting for the stepwise mechanism at 25 °C. However, the deprotonation **TS-C** is rate-limiting for the stepwise mechanism at -90 °C and acylated-HBTM phenylacetate complex **B** is the most stable intermediate (MSI). All other MSIs are starting materials (**SM**).

#### iv) Alternative Computational Method and Mechanisms

The following results are at the same level of theory as the computed catalytic cycle (see Part II for details). The alternative mechanisms are summarized in Figure S2. Alternative 1 features an *in situ*

generated ketene followed by a concerted [2+2]  $\beta$ -lactone formation. This mechanism is not competitive with the mechanism proposed in the manuscript ( $\Delta G^\ddagger = 30.7$  vs  $20.8$  kcal/mol). Alternative 2 utilizes *N,N*-diisopropylethylamine as a catalyst for the concerted [2+2]  $\beta$ -lactone formation. This mechanism is also inaccessible ( $\Delta G^\ddagger = 42.0$  vs  $20.8$  kcal/mol). The final alternative mechanism features catalyst addition to the ketone followed by a stepwise C–O bond formation and finally by a C–C bond formation. The analogous C–C followed by C–O bond formation process could not be located. Similar to the other alternative mechanisms, this pathway is higher in energy than the mechanism proposed in the manuscript ( $\Delta G^\ddagger = 43.2$  vs  $20.8$  kcal/mol).



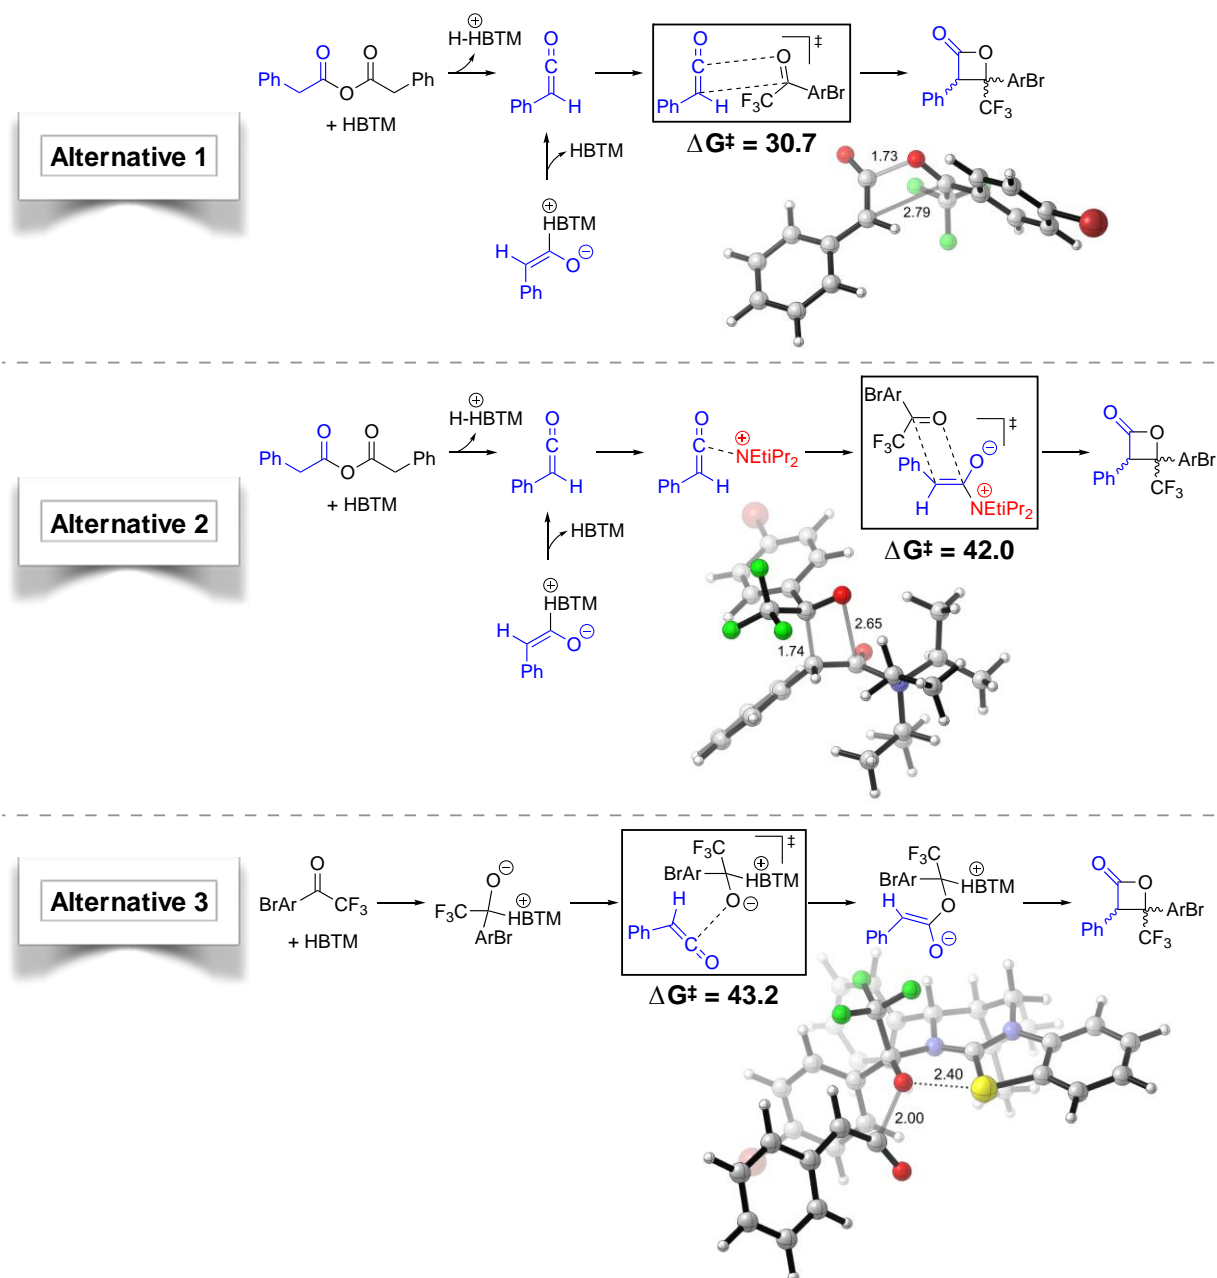

**Figure S2.** Computed alternative mechanisms. Alternative 1: *in situ* generated ketene, followed by concerted [2+2] process. Alternative 2: *N,N*-diisopropylethylamine as a catalyst. Alternative 3: HBTM catalyst addition to the ketone followed by C–O bond formation. All alternative mechanisms are inaccessibly high in energy compared to the mechanism proposed in the manuscript ( $\Delta G^\ddagger = 20.8$ ). Energies are in kcal/mol and distances are in Ångströms.

We also tried B3LYP as an alternative DFT method (Figure S3). B3LYP predicted a stepwise mechanism similar to M06-2X, but also predicted the incorrect lactone product stereoisomer (TS-

(*Re,Re*). Predicted selectivity was still over experimental values. Additionally, computed KIE values do not match experimental KIE results.

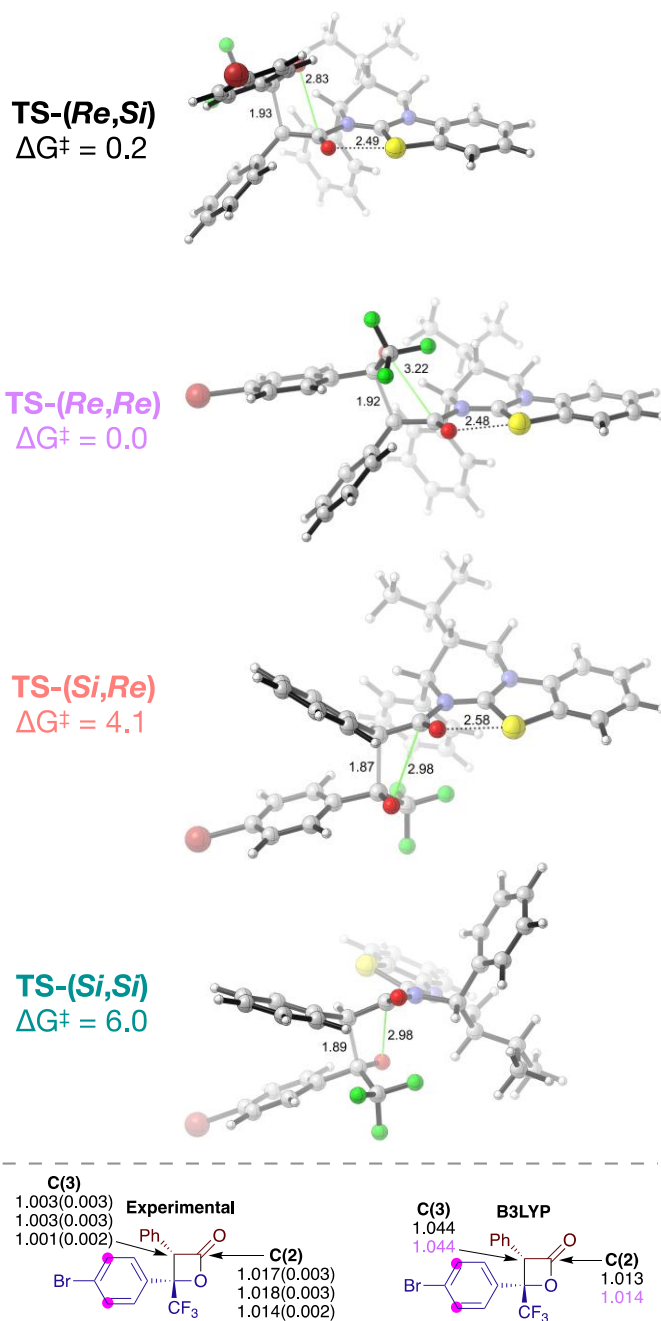

**Figure S3.** Selectivity and KIE results for B3LYP/6-311++G(2df,p)/PCM(DCM)/B3LYP/6-31G(d)/PCM(DCM). KIE values for TS-(*Re,Si*) are in black and TS-(*Re,Re*) are in purple.

### v) Computed Kinetic Isotope Effects

Each computed KIE was adjusted to accommodate the *meta*-carbons of the 4'-bromo-2,2,2-trifluoroacetophenone substituent used as an internal standard by experimentalists (Figure S4). The average of all four labeling experiments determined the adjustment for subsequent computed KIE values. The concerted PBE mechanism KIE values were adjusted by 0.005. The rate-limiting step for the stepwise M06-2X mechanism does not involve the 4'-bromo-2,2,2-trifluoroacetophenone substituent, therefore the subsequent KIE values were not adjusted.

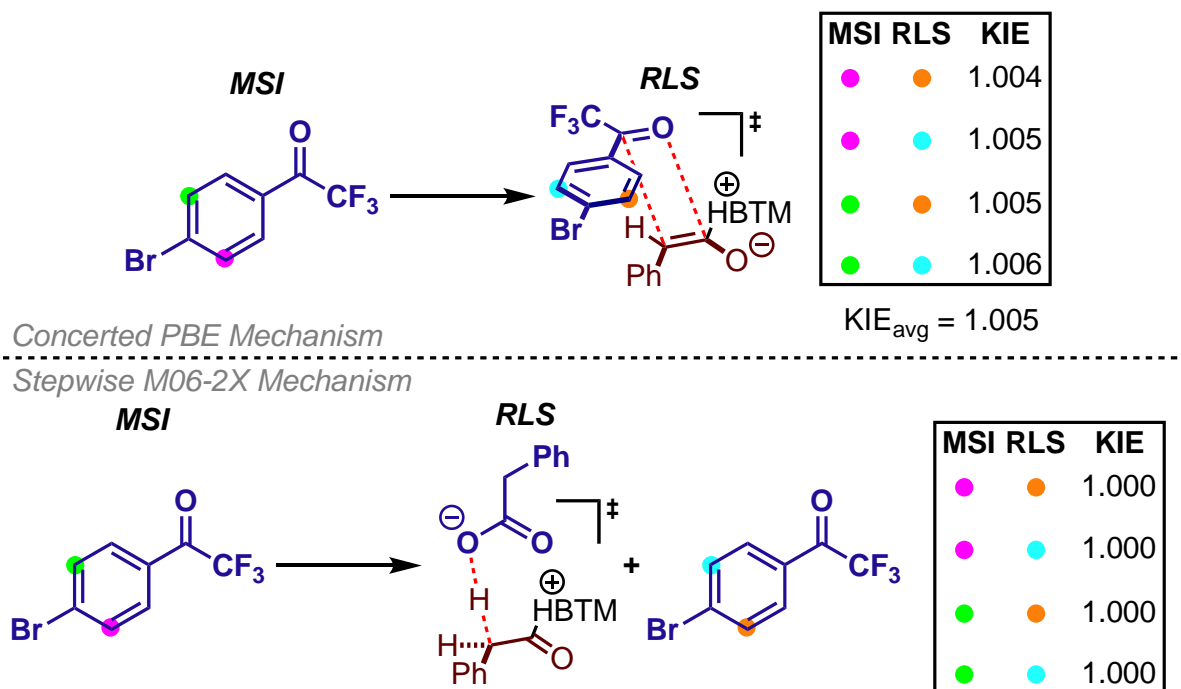

**Figure S4.** Computed kinetic isotope effects (KIE) for *meta*-carbons of the 4'-bromo-2,2,2-trifluoroacetophenone substituent used as an internal standard. Subsequent concerted PBE mechanism KIEs are adjusted by 0.005. The rate-limiting step (RLS) for the stepwise M06-2X mechanism does not involve the 4'-bromo-2,2,2-trifluoroacetophenone, therefore the M06-2X KIEs are not adjusted.

Due to the symmetric characteristic of the phenylacetic anhydride, the reported KIE values in the manuscript are averages from all labeling experiments (Figure S5).

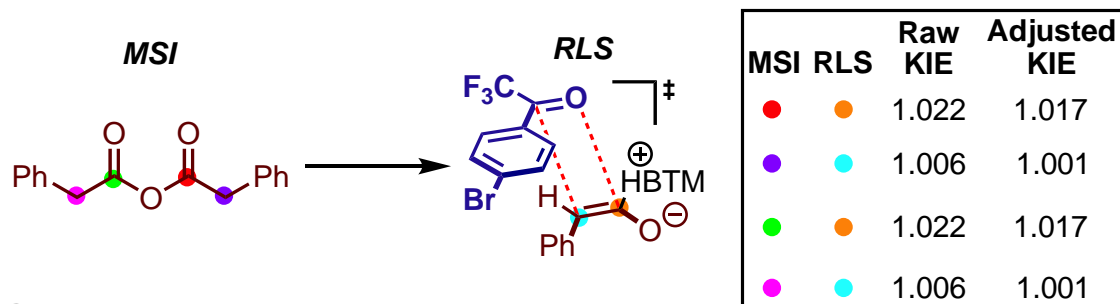

*Concerted PBE Mechanism*

*Stepwise M06-2X Mechanism*

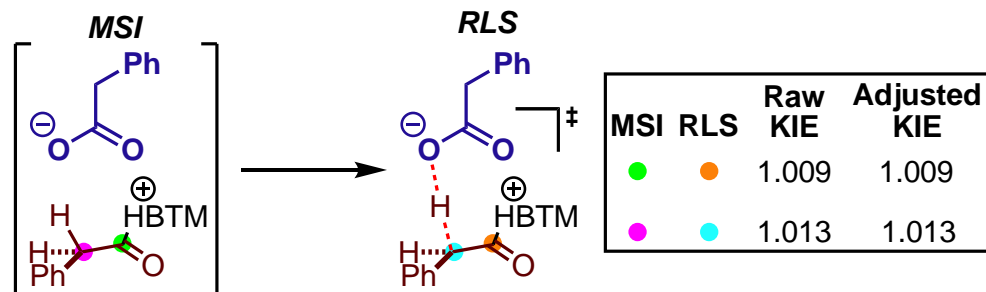

**Figure S5.** Computed KIE experiments. Concerted PBE mechanism KIE values are adjusted by 0.005 and the stepwise M06-2X mechanism values are not adjusted (*vide supra*). Note that the most stable intermediate (MSI) for the M06-2X mechanism is the acylated-HBTM phenylacetate complex **B**.

# Computed Geometries and Energies

## Concerted [2+2] Mechanism Coordinate Diagram: PBE

### SM: Phenylacetic anhydride

Using Gaussian 09: AM64L-G09RevD.01 24-Apr-2013

```
# pbepbe/6-31G*/auto gprint gfinput
scf=(direct,tight,maxcycle=300,xqc)
SCRF=(PCM,SOLVENT=Dichloromethane)
opt=(maxcycle=250) freq=noraman
iop(1/8=18) Temperature=298.15
#N Geom=AllCheck Guess=TCheck SCRF=Check Test GenChk
RPBEPBE/6-31G(d)/Auto
Freq
```

Pointgroup= C1 Stoichiometry= C16H14O3  
C1[X(C16H14O3)] #Atoms= 33  
Charge = 0 Multiplicity = 1

SCF Energy= -842.819202108 Predicted Change= -4.533125D-09

```
Optimization completed. {Found 1 times}
Item Max Val. Criteria Pass? RMS Val. Criteria
Pass?
Force 0.00002 || 0.00045 [ YES ] 0.00000 || 0.00030 [ YES ]
Displ 0.00362 || 0.00180 [ NO ] 0.00362 || 0.00180 [ YES ]
```

| Atomic Type | Coordinates (Angstroms) |           |           |
|-------------|-------------------------|-----------|-----------|
|             | X                       | Y         | Z         |
| C           | 1.215945                | -0.165702 | 0.129526  |
| C           | 2.352661                | 0.157898  | 1.089490  |
| C           | 3.726433                | 0.079099  | 0.462715  |
| O           | 0.000004                | -0.000086 | 0.816311  |
| C           | -1.215943               | 0.165947  | 0.129642  |
| C           | -2.352647               | -0.158234 | 1.089423  |
| C           | -3.726421               | -0.079314 | 0.462666  |
| O           | -1.300508               | 0.559506  | -1.011167 |
| O           | 1.300498                | -0.558603 | -1.011510 |
| C           | 4.474324                | 1.248754  | 0.237949  |
| C           | 5.751887                | 1.182363  | -0.338243 |
| C           | 6.295699                | -0.058878 | -0.699176 |
| C           | 5.556227                | -1.232108 | -0.480275 |
| C           | 4.281369                | -1.162611 | 0.097244  |
| C           | -4.281415               | 1.162466  | 0.097521  |
| C           | -5.556286               | 1.232055  | -0.479957 |
| C           | -6.295715               | 0.058851  | -0.699144 |
| C           | -5.751843               | -1.182460 | -0.338541 |
| C           | -4.474267               | -1.248943 | 0.237611  |
| H           | 2.255837                | -0.542202 | 1.942411  |
| H           | 2.158959                | 1.160629  | 1.511199  |
| H           | -2.255923               | 0.541495  | 1.942661  |
| H           | -2.158841               | -1.161129 | 1.510689  |
| H           | 4.052621                | 2.220869  | 0.519056  |
| H           | 6.322112                | 2.102447  | -0.503760 |
| H           | 7.293174                | -0.113403 | -1.147792 |
| H           | 5.974684                | -2.205224 | -0.758059 |
| H           | 3.709079                | -2.081626 | 0.267176  |
| H           | -3.709160               | 2.081462  | 0.267671  |

|   |           |           |           |
|---|-----------|-----------|-----------|
| H | -5.974787 | 2.205224  | -0.757487 |
| H | -7.293200 | 0.113449  | -1.147728 |
| H | -6.322031 | -2.102526 | -0.504284 |
| H | -4.052518 | -2.221113 | 0.518457  |

### Statistical Thermodynamic Analysis

Temperature= 298.150 Kelvin Pressure= 1.00000 Atm

```
SCF Energy= -842.819202108 Predicted Change= -4.533125D-09
Zero-point correction (ZPE)= -842.5646 0.25454
Internal Energy (U)= -842.5473 0.27182
Enthalpy (H)= -842.5464 0.27277
Gibbs Free Energy (G)= -842.6164 0.20276
```

Frequencies -- 5.9035 17.8941 20.6541

183.15K thermal correction = 0.227392

Single point SCF = -843.073949

### SM: HyperBTM

Using Gaussian 09: AM64L-G09RevD.01 24-Apr-2013

```
# pbepbe/6-31G*/auto gprint gfinput
scf=(direct,tight,maxcycle=300,xqc)
opt=(maxcycle=250) freq=noraman iop(1/8=18)
Temperature=298.15
SCRF=(PCM,SOLVENT=Dichloromethane)
#N Geom=AllCheck Guess=TCheck SCRF=Check Test GenChk
RPBEPBE/6-31G(d)/Auto
Freq
```

Pointgroup= C1 Stoichiometry= C19H20N2S  
C1[X(C19H20N2S)] #Atoms= 42  
Charge = 0 Multiplicity = 1

SCF Energy= -1242.52496543 Predicted Change= -9.655754D-09

```
Optimization completed. {Found 2 times}
Item Max Val. Criteria Pass? RMS Val. Criteria
Pass?
Force 0.00001 || 0.00045 [ YES ] 0.00000 || 0.00030 [ YES ]
Displ 0.00122 || 0.00180 [ YES ] 0.00122 || 0.00180 [ YES ]
```

| Atomic Type | Coordinates (Angstroms) |           |           |
|-------------|-------------------------|-----------|-----------|
|             | X                       | Y         | Z         |
| C           | 4.381114                | 0.809093  | -1.701735 |
| H           | 4.827274                | 1.359136  | -2.536175 |
| C           | 3.011755                | 0.970293  | -1.433696 |
| H           | 2.396988                | 1.629017  | -2.053456 |
| C           | 2.449137                | 0.261868  | -0.360611 |
| C           | 3.253890                | -0.605412 | 0.419881  |
| C           | 4.614839                | -0.763170 | 0.147812  |
| H           | 5.230394                | -1.432447 | 0.756563  |
| C           | 5.177231                | -0.045163 | -0.922654 |
| H           | 6.242109                | -0.159247 | -1.146312 |

|   |           |           |           |
|---|-----------|-----------|-----------|
| N | 1.121492  | 0.293993  | 0.064065  |
| C | 0.809679  | -0.531121 | 1.144101  |
| S | 2.297198  | -1.383339 | 1.690725  |
| C | 0.079439  | 1.151118  | -0.508676 |
| H | -0.332350 | 0.684773  | -1.425555 |
| H | 0.552130  | 2.103752  | -0.796211 |
| C | -1.024895 | 1.395000  | 0.534998  |
| C | -2.187050 | 2.263089  | -0.019095 |
| C | -3.115425 | 2.737213  | 1.115566  |
| H | -2.563423 | 3.375238  | 1.830178  |
| H | -3.556259 | 1.902116  | 1.684413  |
| H | -3.948285 | 3.335128  | 0.706517  |
| H | -2.779081 | 1.634870  | -0.713044 |
| C | -1.685067 | 3.489944  | -0.806200 |
| H | -1.016912 | 4.116475  | -0.186273 |
| H | -2.539755 | 4.117856  | -1.112111 |
| H | -1.140114 | 3.211589  | -1.724224 |
| H | -0.556098 | 1.959115  | 1.367488  |
| C | -1.470280 | 0.027594  | 1.159838  |
| C | -2.283099 | -0.859404 | 0.211511  |
| H | -2.124838 | 0.260588  | 2.019271  |
| N | -0.327179 | -0.719191 | 1.717471  |
| C | -1.663838 | -1.689232 | -0.745527 |
| H | -0.571452 | -1.740081 | -0.799280 |
| C | -2.427289 | -2.478928 | -1.617793 |
| H | -1.922788 | -3.116583 | -2.351683 |
| C | -3.828197 | -2.463988 | -1.543828 |
| H | -4.423754 | -3.085108 | -2.221104 |
| C | -4.458297 | -1.657527 | -0.584762 |
| H | -5.550580 | -1.648121 | -0.504564 |
| C | -3.690868 | -0.868466 | 0.284682  |
| H | -4.195230 | -0.255053 | 1.040336  |

Statistical Thermodynamic Analysis  
 Temperature= 298.150 Kelvin Pressure= 1.00000 Atm

SCF Energy= -1242.52496543 Predicted Change= -9.655754D-09  
 Zero-point correction (ZPE)= -1242.1836 0.34127  
 Internal Energy (U)= -1242.1642 0.36070  
 Enthalpy (H)= -1242.1633 0.36164  
 Gibbs Free Energy (G)= -1242.2319 0.29305

Frequencies -- 27.3394 33.3733 58.4929

183.15K thermal correction = 0.316672  
 Single point SCF = -1242.790297

### SM: N,N-diisopropylethylamine

Using Gaussian 09: AM64L-G09RevD.01 24-Apr-2013

```
# pbepbe/6-31G*/auto gfprint gfinput
scf=(direct,tight,maxcycle=300,xqc)
opt=(maxcycle=250) freq=noraman iop(1/8=18)
Temperature=298.15
SCRFF=(PCM,SOLVENT=Dichloromethane)
#N Geom=AllCheck Guess=TCheck SCRFF=Check Test GenChk
RPBEPBE/6-31G(d)/Auto
Freq
```

Pointgroup= C1 Stoichiometry= C8H19N C1[X(C8H19N)]  
 #Atoms= 28  
 Charge = 0 Multiplicity = 1

SCF Energy= -370.514749575 Predicted Change= -4.774460D-08

Optimization completed. {Found 1 times}  
 Item Max Val. Criteria Pass? RMS Val. Criteria  
 Pass?  
 Force 0.00003 || 0.00045 [ YES ] 0.00000 || 0.00030 [ YES ]  
 Displ 0.00273 || 0.00180 [ NO ] 0.00273 || 0.00180 [ YES ]

| Atomic Type | Coordinates (Angstroms) |           |           |
|-------------|-------------------------|-----------|-----------|
|             | X                       | Y         | Z         |
| N           | 0.002999                | 0.271176  | -0.203343 |
| C           | 1.048808                | -0.779246 | -0.198624 |
| C           | 2.159155                | -0.414477 | -1.202619 |
| C           | 1.666903                | -1.130092 | 1.176124  |
| C           | -1.396839               | -0.191938 | -0.074762 |
| C           | -1.717617               | -1.045100 | 1.174157  |
| C           | -1.867208               | -0.900165 | -1.357770 |
| C           | 0.305972                | 1.461561  | 0.600518  |
| C           | -0.238754               | 2.755788  | -0.020836 |
| H           | 1.733072                | -0.242276 | -2.204783 |
| H           | 2.910385                | -1.221591 | -1.270636 |
| H           | 2.689035                | 0.505794  | -0.895230 |
| H           | 0.557913                | -1.694415 | -0.576625 |
| H           | 2.357630                | -1.985515 | 1.070012  |
| H           | 0.899667                | -1.405480 | 1.917339  |
| H           | 2.251543                | -0.287752 | 1.586514  |
| H           | -1.995460               | 0.734185  | 0.008682  |
| H           | -2.806747               | -1.210647 | 1.255276  |
| H           | -1.386037               | -0.546374 | 2.101751  |
| H           | -1.234689               | -2.036855 | 1.122375  |
| H           | -1.676711               | -0.267148 | -2.240407 |
| H           | -2.949396               | -1.113364 | -1.303879 |
| H           | -1.352229               | -1.865877 | -1.510224 |
| H           | 1.403509                | 1.553721  | 0.670786  |
| H           | -0.058815               | 1.373219  | 1.651147  |
| H           | 0.168224                | 2.895274  | -1.036735 |
| H           | 0.045831                | 3.626773  | 0.596042  |
| H           | -1.340243               | 2.752115  | -0.095128 |

Statistical Thermodynamic Analysis  
 Temperature= 298.150 Kelvin Pressure= 1.00000 Atm

SCF Energy= -370.514749575 Predicted Change= -4.774460D-08  
 Zero-point correction (ZPE)= -370.2589 0.25584  
 Internal Energy (U)= -370.2464 0.26829  
 Enthalpy (H)= -370.2455 0.26924  
 Gibbs Free Energy (G)= -370.2961 0.21859

Frequencies -- 62.3975 66.5372 104.7307

183.15K thermal correction = 0.236373  
 Single point SCF = -370.620211

### SM: 4'-bromo-2,2,2-trifluoroacetophenone

Using Gaussian 09: AM64L-G09RevD.01 24-Apr-2013

```
# pbepbe/6-31G*/auto gfprint gfinput
scf=(direct,tight,maxcycle=300,xqc)
```

SCRF=(PCM,SOLVENT=Dichloromethane)  
 opt=(maxcycle=250) freq=norman  
 iop(1/8=18) Temperature=298.15  
 #N Geom=AllCheck Guess=TCheck SCRF=Check Test GenChk  
 RPBPBE/6-31G(d)/Auto  
 Freq

Pointgroup= C1 Stoichiometry= C8H4BrF3O  
 C1[X(C8H4BrF3O)] #Atoms= 17  
 Charge = 0 Multiplicity = 1

SCF Energy= -3252.58908828 Predicted Change= -1.230780D-08

Optimization completed. {Found 2 times}  
 Item Max Val. Criteria Pass? RMS Val. Criteria  
 Pass?  
 Force 0.00006 || 0.00045 [ YES ] 0.00001 || 0.00030 [ YES ]  
 Displ 0.00028 || 0.00180 [ YES ] 0.00028 || 0.00180 [ YES ]

| Atomic Type | Coordinates (Angstroms) |           |           |
|-------------|-------------------------|-----------|-----------|
|             | X                       | Y         | Z         |
| C           | -0.861364               | 0.482695  | 0.000021  |
| C           | -2.312383               | 0.784777  | 0.000038  |
| O           | -2.776140               | 1.922494  | 0.000056  |
| C           | -3.319148               | -0.408576 | 0.000013  |
| F           | -4.587703               | 0.036236  | -0.000033 |
| F           | -3.141342               | -1.192189 | 1.100070  |
| F           | -3.141265               | -1.192203 | -1.100021 |
| C           | 0.028335                | 1.581279  | 0.000053  |
| C           | 1.408316                | 1.383907  | 0.000038  |
| C           | 1.903737                | 0.069469  | -0.000010 |
| Br          | 3.786974                | -0.213339 | -0.000031 |
| C           | 1.045014                | -1.039345 | -0.000045 |
| C           | -0.336769               | -0.829913 | -0.000029 |
| H           | -0.387372               | 2.593085  | 0.000089  |
| H           | 2.095923                | 2.233142  | 0.000064  |
| H           | 1.452831                | -2.052950 | -0.000084 |
| H           | -0.997982               | -1.698721 | -0.000057 |

Statistical Thermodynamic Analysis  
 Temperature= 298.150 Kelvin Pressure= 1.00000 Atm

SCF Energy= -3252.58908828 Predicted Change= -1.230780D-08  
 Zero-point correction (ZPE)= -3252.4871 0.10198  
 Internal Energy (U)= -3252.4755 0.11351  
 Enthalpy (H)= -3252.4746  
 0.11445  
 Gibbs Free Energy (G)= -3252.5271  
 0.06191  
 Frequencies -- 34.2491 53.3532 78.1002

183.15K thermal correction = 0.080579  
 Single point SCF = -3255.247932

**TS-A: HBTM addition to phenylacetic anhydride (Re-face)**

Using Gaussian 09: AM64L-G09RevD.01 24-Apr-2013

# pbepbe/6-31G(d)/auto gfpriut gfinput  
 scf=(direct,tight,maxcycle=300,xqc)

opt=(verytight,maxcycle=250,calcfc,ts,noeigentest) freq=norman  
 SCRF=(PCM,SOLVENT=Dichloromethane) iop(1/8=12)  
 Temperature=298.15  
 #N Geom=AllCheck Guess=TCheck SCRF=Check Test GenChk  
 RPBPBE/6-31G(d)/Auto  
 Freq

Pointgroup= C1 Stoichiometry= C35H34N2O3S  
 C1[X(C35H34N2O3S)] #Atoms= 75  
 Charge = 0 Multiplicity = 1

SCF Energy= -2085.34362314 Predicted Change= -5.071033D-13

Optimization completed. {Found 1 times}  
 Item Max Val. Criteria Pass? RMS Val. Criteria  
 Pass?  
 Force 0.00000 || 0.00000 [ YES ] 0.00000 || 0.00000 [ YES ]  
 Displ 0.00002 || 0.00000 [ NO ] 0.00002 || 0.00000 [ YES ]

| Atomic Type | Coordinates (Angstroms) |           |           |
|-------------|-------------------------|-----------|-----------|
|             | X                       | Y         | Z         |
| C           | -6.019057               | -0.577845 | -1.899186 |
| C           | -5.088337               | -0.306383 | -0.884469 |
| C           | -3.738736               | -0.598772 | -1.129459 |
| C           | -3.330752               | -1.159455 | -2.357723 |
| C           | -4.261947               | -1.423603 | -3.367243 |
| C           | -5.614079               | -1.129521 | -3.126742 |
| N           | -2.661657               | -0.401709 | -0.257293 |
| C           | -1.438681               | -0.821778 | -0.733171 |
| S           | -1.577101               | -1.417461 | -2.411126 |
| C           | -2.777948               | 0.276226  | 1.041066  |
| C           | -1.412079               | 0.833312  | 1.464006  |
| C           | -1.454294               | 1.526111  | 2.852665  |
| C           | -0.147333               | 2.293206  | 3.130822  |
| C           | -2.646059               | 2.496052  | 2.981869  |
| C           | -0.343343               | -0.301227 | 1.334625  |
| C           | -0.488877               | -1.432966 | 2.355573  |
| N           | -0.330135               | -0.816232 | -0.044639 |
| C           | -1.369037               | -2.515819 | 2.155097  |
| C           | -1.498215               | -3.524995 | 3.120616  |
| C           | -0.743285               | -3.476061 | 4.301727  |
| C           | 0.149085                | -2.413731 | 4.506525  |
| C           | 0.276346                | -1.405954 | 3.539565  |
| C           | 1.318695                | -1.056939 | -0.998031 |
| C           | 1.965178                | -2.144604 | -0.123522 |
| C           | 3.392651                | -2.431828 | -0.551246 |
| O           | 1.985274                | 0.227038  | -0.584082 |
| C           | 1.554019                | 1.415137  | -1.089980 |
| C           | 2.629604                | 2.489183  | -0.875158 |
| C           | 2.066772                | 3.873365  | -0.635534 |
| O           | 0.480429                | 1.611509  | -1.640400 |
| O           | 1.060574                | -1.228979 | -2.193041 |
| C           | 4.477636                | -2.037493 | 0.254189  |
| C           | 5.798459                | -2.302411 | -0.137607 |
| C           | 6.053524                | -2.963834 | -1.348218 |
| C           | 4.979344                | -3.356133 | -2.162972 |
| C           | 3.660725                | -3.092085 | -1.767347 |
| C           | 1.420526                | 4.582875  | -1.666978 |
| C           | 0.891463                | 5.859845  | -1.433297 |
| C           | 1.000358                | 6.448965  | -0.163620 |
| C           | 1.643260                | 5.752446  | 0.870299  |
| C           | 2.171339                | 4.473705  | 0.633511  |
| H           | -7.076243               | -0.356050 | -1.724368 |
| H           | -5.411262               | 0.115751  | 0.071245  |
| H           | -3.943112               | -1.851712 | -4.322567 |

```

H   -6.355520   -1.335145   -3.904583
H   -3.179381   -0.428594    1.794574
H   -3.504498   1.093645    0.914219
H    0.008987   3.089592    2.380154
H    0.743677   1.643268    3.117717
H   -0.189824   2.771271    4.124667
H   -1.569867   0.740336    3.624425
H   -2.632898   3.252645    2.175882
H   -2.590890   3.033431    3.944153
H   -3.620175   1.979106    2.953351
H   -1.123094   1.595931    0.713554
H    0.649095   0.158512    1.480981
H   -1.946901   -2.591157    1.228184
H   -2.186416   -4.357890    2.942271
H   -0.841201   -4.267171    5.052309
H    0.756818   -2.371744    5.416468
H    0.988360   -0.589116    3.704400
H    1.332593   -3.040629   -0.244194
H    1.936318   -1.854968    0.938837
H    3.248975   2.476707   -1.794160
H    3.292146   2.176906   -0.051750
H    4.283309   -1.519857    1.200979
H    6.629261   -1.991954    0.505289
H    7.083608   -3.174236   -1.655163
H    5.169054   -3.872544   -3.110250
H    2.823925   -3.390179   -2.407917
H    1.330425   4.126475   -2.658022
H    0.394504   6.398549   -2.247272
H    0.590003   7.448151    0.017130
H    1.738090   6.204498    1.863415
H    2.676539   3.934663    1.443844

```

```

-----
Statistical Thermodynamic Analysis
Temperature= 298.150 Kelvin   Pressure= 1.00000 Atm
-----

```

```

-----
SCF Energy= -2085.34362314   Predicted Change= -
5.071033D-13
Zero-point correction (ZPE)= -2084.7454   0.59817
Internal Energy (U)= -2084.7084   0.63513
Enthalpy (H)= -2084.7075
0.63607
Gibbs Free Energy (G)= -2084.8181
0.52549
-----
Frequencies -- -122.4556   16.2913   19.2429

```

```

183.15K thermal correction = 0.562898
Single point SCF = -2085.856939

```

### B: Acylated-HBTM phenylacetate complex

```

-----
Using Gaussian 09: AM64L-G09RevD.01 24-Apr-2013
-----
# pbepbe/6-31G*/auto gfprint gfinput
scf=(direct,tight,maxcycle=300,xqc)
opt=(maxcycle=250) freq=noraman iop(1/8=18)
Temperature=298.15
SCRF=(PCM,SOLVENT=Dichloromethane)
#N Geom=AllCheck Guess=TChek SCRf=Check Test GenChk
RPBEPBE/6-31G(d)/Auto
Freq
-----
Pointgroup= C1   Stoichiometry= C35H34N2O3S
C1[X(C35H34N2O3S)] #Atoms= 75
Charge = 0       Multiplicity = 1
-----

```

```

SCF Energy= -2085.35330388   Predicted Change= -3.255853D-
06
-----

```

```

-----
Optimization completed.   {Found 1 times}
Item   Max Val.   Criteria   Pass?   RMS Val.   Criteria
Pass?
Force  0.00013 || 0.00045 [ YES ]   0.00001 || 0.00030 [
YES ]
Displ  0.14330 || 0.00180 [ NO ]   0.14330 || 0.00180 [
NO ]
-----

```

```

-----
Atomic   Coordinates (Angstroms)
Type     X           Y           Z
-----
C    6.269836   2.288570   -1.569102
C    5.421046   1.190692   -1.385727
C    4.158344   1.432181   -0.822926
C    3.761423   2.729128   -0.446370
C    4.613940   3.824381   -0.635410
C    5.873338   3.589610   -1.201658
N    3.156342   0.483011   -0.557510
C    2.046322   0.997204   0.022317
S    2.124551   2.735166   0.237774
C    3.263535   -0.932961   -0.952101
C    1.863404   -1.519287   -1.130822
C    1.895459   -3.019735   -1.543797
C    0.533349   -3.469756   -2.105486
C    2.995072   -3.323497   -2.581228
C    1.016734   -1.253998   0.148341
C    1.437916   -2.032880   1.388372
N    1.005651   0.221738   0.415424
C    2.490664   -1.622327   -2.231524
C    2.860273   -2.395611   3.342154
C    2.182897   -3.589534   3.629254
C    1.124878   -4.001458   2.805279
C    0.752634   -3.226141   1.698462
C    -0.130630   0.863461   1.009063
C    -1.203174   -0.027595   1.589562
C    -2.357026   0.747803   2.189951
O    -1.027580   0.195391   -1.714664
C    -1.919700   -0.701368   -1.742086
C    -2.940197   -0.669435   -2.929877
C    -4.306527   -0.201696   -2.480564
O    -2.095994   -1.640236   -0.888807
O    -0.124262   2.092820   1.091450
C    -3.594110   0.783533   1.520056
C    -4.682504   1.480807   2.066042
C    -4.547121   2.149133   3.291866
C    -3.317632   2.115315   3.969738
C    -2.231275   1.419665   3.421214
C    -5.133419   -1.031734   -1.692395
C    -6.385674   -0.586910   -1.245807
C    -6.839775   0.701066   -1.577099
C    -6.026714   1.537766   -2.356886
C    -4.773883   1.088662   -2.802066
H    7.260339   2.127161   -2.004091
H    5.741409   0.183134   -1.662489
H    4.304343   4.833406   -0.347813
H    6.556839   4.429231   -1.357442
H    3.850417   -1.475328   -0.187942
H    3.819718   -0.954081   -1.900246
H    0.352731   -2.996914   -3.088746
H    -0.320190   -3.202000   -1.460987
H    0.529837   -4.563282   -2.255405
H    2.119394   -3.614675   -0.637580
H    2.880735   -2.694541   -3.483349
H    2.918143   -4.376534   -2.901516
H    4.014551   -3.179236   -2.184167
H    1.354600   -0.949780   -1.933068

```



|   |           |           |           |
|---|-----------|-----------|-----------|
| H | -0.029107 | -1.494652 | -0.120899 |
| H | 3.019315  | -0.680710 | 2.045091  |
| H | 3.677667  | -2.057634 | 3.987359  |
| H | 2.470991  | -4.190180 | 4.498036  |
| H | 0.578016  | -4.922968 | 3.029535  |
| H | -0.087761 | -3.540842 | 1.069938  |
| H | -0.719283 | -0.676559 | 2.346376  |
| H | -1.572680 | -0.705564 | 0.783881  |
| H | -3.008438 | -1.695296 | -3.336323 |
| H | -2.552046 | -0.006282 | -3.720593 |
| H | -3.704909 | 0.250111  | 0.569262  |
| H | -5.636761 | 1.496230  | 1.528239  |
| H | -5.396312 | 2.691903  | 3.720978  |
| H | -3.205363 | 2.630722  | 4.929791  |
| H | -1.273996 | 1.394926  | 3.955037  |
| H | -4.769023 | -2.027020 | -1.417862 |
| H | -7.012600 | -1.249845 | -0.638798 |
| H | -7.821233 | 1.046482  | -1.234360 |
| H | -6.368795 | 2.544308  | -2.622354 |
| H | -4.144844 | 1.748264  | -3.411832 |

| Atomic Coordinates (Angstroms) |           |           |           |
|--------------------------------|-----------|-----------|-----------|
| Type                           | X         | Y         | Z         |
| C                              | -5.602253 | -2.713314 | -1.202116 |
| C                              | -4.715373 | -1.988030 | -0.396036 |
| C                              | -3.355280 | -2.011572 | -0.739494 |
| C                              | -2.893027 | -2.744150 | -1.848080 |
| C                              | -3.785102 | -3.464648 | -2.651763 |
| C                              | -5.145995 | -3.441908 | -2.317220 |
| N                              | -2.305210 | -1.354061 | -0.074711 |
| C                              | -1.078536 | -1.578721 | -0.611069 |
| S                              | -1.131553 | -2.593834 | -2.044128 |
| C                              | -2.526026 | -0.426876 | 1.047616  |
| C                              | -1.359492 | 0.557209  | 1.137309  |
| C                              | -1.511039 | 1.547934  | 2.324374  |
| C                              | -0.466099 | 2.677935  | 2.248922  |
| C                              | -2.919670 | 2.173822  | 2.371829  |
| C                              | -0.020073 | -0.235749 | 1.155068  |
| C                              | 0.246619  | -1.054269 | 2.416267  |
| N                              | 0.053564  | -1.090340 | -0.066816 |
| C                              | -0.290964 | -2.343511 | -2.005560 |
| C                              | -0.049433 | -3.052709 | 3.790957  |
| C                              | 0.737641  | -2.488506 | 4.805323  |
| C                              | 1.290271  | -1.212599 | 4.623090  |
| C                              | 1.049760  | -0.505145 | 3.436857  |
| C                              | 1.324079  | -1.361918 | -0.742058 |
| C                              | 2.508833  | -0.790130 | -0.152073 |
| C                              | 3.853268  | -1.219341 | -0.627181 |
| O                              | 1.239034  | -2.010714 | -1.804260 |
| C                              | 4.158340  | -1.478251 | -1.985128 |
| C                              | 5.459166  | -1.821807 | -2.377856 |
| C                              | 6.495499  | -1.907113 | -1.434869 |
| C                              | 6.212639  | -1.640745 | -0.086056 |
| C                              | 4.912057  | -1.301898 | -0.308279 |
| H                              | -6.667637 | -2.712200 | -0.953942 |
| H                              | -5.076602 | -1.434400 | 0.474498  |
| H                              | -3.427930 | -4.031246 | -3.516970 |
| H                              | -5.859789 | -3.999671 | -2.930468 |
| H                              | -2.649894 | -1.008840 | 1.979942  |
| H                              | -3.467135 | 0.102283  | 0.838771  |
| H                              | -0.571596 | 3.347406  | 3.119767  |
| H                              | -0.608939 | 3.284685  | 1.337389  |
| H                              | 0.573799  | 2.310721  | 2.243746  |
| H                              | -1.356639 | 0.984017  | 3.264709  |
| H                              | -2.959643 | 2.938513  | 3.166119  |
| H                              | -3.710278 | 1.436592  | 2.592170  |
| H                              | -3.164801 | 2.673872  | 1.416703  |
| H                              | -1.333397 | 1.145282  | 0.199629  |
| H                              | 0.779516  | 0.506209  | 1.023980  |
| H                              | -0.884419 | -2.819197 | 1.817464  |
| H                              | -0.473080 | -4.054413 | 3.915904  |
| H                              | 0.928680  | -3.045632 | 5.728099  |
| H                              | 1.919866  | -0.767686 | 5.400297  |
| H                              | 1.499796  | 0.484473  | 3.300076  |
| H                              | 2.465513  | -0.716650 | 0.944132  |
| H                              | 2.428307  | 0.570089  | -0.474184 |
| H                              | 3.362901  | -1.416489 | -2.731699 |
| H                              | 5.664896  | -2.021048 | -3.435815 |
| H                              | 7.510489  | -2.174948 | -1.747258 |
| H                              | 7.007535  | -1.700932 | 0.665839  |
| H                              | 4.703460  | -1.097894 | 1.365849  |
| O                              | 0.412087  | 1.560606  | -1.536794 |
| C                              | 1.426494  | 2.240580  | -1.287292 |
| C                              | 1.510590  | 3.721905  | -1.726603 |
| C                              | 0.340442  | 4.558449  | -1.250637 |
| O                              | 2.504986  | 1.812312  | -0.677376 |
| C                              | -0.970440 | 4.306028  | -1.707265 |
| C                              | -2.049902 | 5.073142  | -1.246482 |
| C                              | -1.839601 | 6.112624  | -0.325347 |
| C                              | -0.539991 | 6.376581  | 0.131778  |

Statistical Thermodynamic Analysis  
Temperature= 298.150 Kelvin Pressure= 1.00000 Atm

SCF Energy= -2085.35330388 Predicted Change= -3.255853D-06  
Zero-point correction (ZPE)= -2084.7541 0.59916  
Internal Energy (U)= -2084.7163 0.63691  
Enthalpy (H)= -2084.7154  
0.63785  
Gibbs Free Energy (G)= -2084.8289  
0.52439

Frequencies -- 9.7201 16.0633 22.4384

183.15K thermal correction = 0.562852  
Single point SCF = -2085.872416

**TS-C: Acylated-HBTM deprotonation via phenylacetate**

Using Gaussian 09: AM64L-G09RevD.01 24-Apr-2013

# pbepbe/6-31G(d)/auto gfpint gfinput  
scf=(direct,tight,maxcycle=300,xqc)  
opt=(maxcycle=250,calcfc,ts,noeigentest) freq=noraman  
SCRF=(PCM,SOLVENT=Dichloromethane) iop(1/8=2)  
Temperature=298.15  
#N Geom=AllCheck Guess=TChek SCRF=Check Test GenChk  
RPBEPBE/6-31G(d)/Auto  
Freq

Pointgroup= C1 Stoichiometry= C35H34N2O3S  
C1[X(C35H34N2O3S)] #Atoms= 75  
Charge = 0 Multiplicity = 1

SCF Energy= -2085.34371516 Predicted Change= -6.492663D-09

Optimization completed. {Found 1 times}  
Item Max Val. Criteria Pass? RMS Val. Criteria  
Pass?  
Force 0.00001 || 0.00045 [ YES ] 0.00000 || 0.00030 [ YES ]  
Displ 0.00187 || 0.00180 [ NO ] 0.00187 || 0.00180 [ YES ]

|   |           |          |           |
|---|-----------|----------|-----------|
| C | 0.538204  | 5.603845 | -0.327363 |
| H | 2.462843  | 4.151558 | -1.377622 |
| H | 1.538274  | 3.709809 | -2.833422 |
| H | -1.136387 | 3.488302 | -2.414990 |
| H | -3.060465 | 4.863493 | -1.614622 |
| H | -2.682812 | 6.714998 | 0.029414  |
| H | -0.362083 | 7.185899 | 0.848328  |
| H | 1.551524  | 5.814679 | 0.034887  |

Statistical Thermodynamic Analysis  
Temperature= 298.150 Kelvin Pressure= 1.00000 Atm

```
=====
SCF Energy= -2085.34371516 Predicted Change= -
6.492663D-09
Zero-point correction (ZPE)= -2084.7489 0.59475
Internal Energy (U)= -2084.7117 0.63193
Enthalpy (H)= -2084.7108
0.63288
Gibbs Free Energy (G)= -2084.8215
0.52221
=====
```

Frequencies -- -1001.0331 16.4854 24.1148

183.15K thermal correction = 0.559636  
Single point SCF = -2085.864613

#### N,N-diisopropylethylamine/phenylacetic acid complex

Using Gaussian 09: AM64L-G09RevD.01 24-Apr-2013

```
=====
# pbepbe/6-31G*/auto gfprint gfinput
scf=(direct,tight,maxcycle=300,xqc)
opt=(maxcycle=250) freq=noraman iop(1/8=8)
Temperature=298.15
SCRF=(PCM,SOLVENT=Dichloromethane)
#N Geom=AllCheck Guess=TCheck SCRF=Check Test GenChk
RPBEPBE/6-31G(d)/Auto
Freq
=====
```

```
Pointgroup= C1 Stoichiometry= C16H27NO2
C1[X(C16H27NO2)] #Atoms= 46
Charge = 0 Multiplicity = 1
=====
SCF Energy= -830.124407497 Predicted Change= -8.407285D-
09
=====
```

```
Optimization completed. {Found 1 times}
Item Max Val. Criteria Pass? RMS Val. Criteria
Pass?
Force 0.00000 || 0.00045 [ YES ] 0.00000 || 0.00030 [
YES ]
Displ 0.01042 || 0.00180 [ NO ] 0.01042 || 0.00180 [
NO ]
=====
```

| Atomic<br>Type | Coordinates (Angstroms) |           |           |
|----------------|-------------------------|-----------|-----------|
|                | X                       | Y         | Z         |
| N              | 2.641099                | -0.120019 | -0.106003 |
| C              | 2.636592                | -0.734256 | -1.484015 |
| C              | 2.263319                | -2.224866 | -1.389869 |
| C              | 1.675864                | -0.025580 | -2.451892 |
| C              | 2.691362                | 1.387200  | -0.115425 |
| C              | 2.505016                | 1.945545  | 1.304253  |
| C              | 3.943978                | 1.978921  | -0.786077 |
| C              | 3.730603                | -0.718379 | 0.736600  |
| C              | 3.216378                | -1.521265 | 1.935555  |

|   |           |           |           |
|---|-----------|-----------|-----------|
| H | 1.234635  | -2.347514 | -1.009180 |
| H | 2.942805  | -2.793029 | -0.733616 |
| H | 2.316936  | -2.680321 | -2.393077 |
| H | 3.665463  | -0.664625 | -1.899446 |
| H | 1.593712  | -0.626383 | -3.373099 |
| H | 2.028833  | 0.976257  | -2.745120 |
| H | 0.669681  | 0.079986  | -2.012589 |
| H | 1.799383  | 1.692225  | -0.685445 |
| H | 3.377369  | 1.754198  | 1.953496  |
| H | 1.610710  | 1.519527  | 1.787675  |
| H | 2.372695  | 3.039314  | 1.247850  |
| H | 4.863847  | 1.743902  | -0.222197 |
| H | 4.075318  | 1.614803  | -1.818849 |
| H | 3.854838  | 3.077980  | -0.828408 |
| H | 4.367827  | -1.358688 | 0.100262  |
| H | 4.390905  | 0.087348  | 1.098353  |
| H | 2.569535  | -2.356008 | 1.619136  |
| H | 4.069764  | -1.938759 | 2.497821  |
| H | 2.631260  | -0.886124 | 2.621165  |
| C | -3.736765 | 1.151318  | 0.369575  |
| C | -4.924282 | 1.377210  | -0.339999 |
| C | -5.693061 | 0.294059  | -0.795358 |
| C | -5.265004 | -1.015870 | -0.534864 |
| C | -4.074765 | -1.238251 | 0.174481  |
| C | -3.295811 | -0.160576 | 0.635860  |
| C | -2.014399 | -0.414443 | 1.399178  |
| C | -0.737392 | -0.002248 | 0.648779  |
| O | 0.299857  | -0.771507 | 0.985069  |
| O | -0.689002 | 0.952957  | -0.131595 |
| H | -3.138558 | 1.998798  | 0.719196  |
| H | -5.252566 | 2.403745  | -0.536197 |
| H | -6.622609 | 0.471157  | -1.346878 |
| H | -5.857935 | -1.868520 | -0.883024 |
| H | -3.744857 | -2.264415 | 0.375950  |
| H | 1.212626  | -0.451437 | 0.507915  |
| H | -1.927479 | -1.474071 | 1.689716  |
| H | -2.008474 | 0.168069  | 2.342134  |

Statistical Thermodynamic Analysis  
Temperature= 298.150 Kelvin Pressure= 1.00000 Atm

```
=====
SCF Energy= -830.124407497 Predicted Change= -
8.407285D-09
Zero-point correction (ZPE)= -829.7266 0.39772
Internal Energy (U)= -829.7044 0.41998
Enthalpy (H)= -829.7034
0.42092
Gibbs Free Energy (G)= -829.7805
0.34381
=====
```

Frequencies -- 7.1752 16.8437 39.3467

183.15K thermal correction = 0.370473  
Single point SCF = -830.373152

#### D: (Z)-enolate

Using Gaussian 09: AM64L-G09RevD.01 24-Apr-2013

```
=====
# pbepbe/6-31G*/auto gfprint gfinput
scf=(direct,tight,maxcycle=300,xqc)
opt=(maxcycle=250) freq=noraman iop(1/8=18)
Temperature=298.15
SCRF=(PCM,SOLVENT=Dichloromethane)
#N Geom=AllCheck Guess=TCheck SCRF=Check Test GenChk
RPBEPBE/6-31G(d)/Auto
Freq
=====
```

-----  
 Pointgroup= C1 Stoichiometry= C27H26N2OS  
 C1[X(C27H26N2OS)] #Atoms= 57  
 Charge = 0 Multiplicity = 1  
 -----  
 SCF Energy= -1625.74443064 Predicted Change= -3.924062D-09  
 =====

Optimization completed. {Found 2 times}  
 Item Max Val. Criteria Pass? RMS Val. Criteria  
 Pass?  
 Force 0.00001 || 0.00045 [ YES ] 0.00000 || 0.00030 [ YES ]  
 Displ 0.00122 || 0.00180 [ YES ] 0.00122 || 0.00180 [ YES ]  
 -----

| Atomic Type | Coordinates (Angstroms) |           |           |
|-------------|-------------------------|-----------|-----------|
|             | X                       | Y         | Z         |
| C           | -5.609609               | -1.814045 | 0.472444  |
| C           | -4.676193               | -0.813184 | 0.166808  |
| C           | -3.324293               | -1.180355 | 0.095811  |
| C           | -2.911781               | -2.504535 | 0.332271  |
| C           | -3.849872               | -3.499223 | 0.632287  |
| C           | -5.204851               | -3.141851 | 0.701348  |
| N           | -2.235938               | -0.340545 | -0.196868 |
| C           | -1.020402               | -0.959098 | -0.163658 |
| S           | -1.143145               | -2.687444 | 0.171518  |
| C           | -2.385925               | 1.076545  | -0.555750 |
| C           | -1.176614               | 1.509970  | -1.381877 |
| C           | -1.257471               | 2.990405  | -1.869298 |
| C           | -1.993009               | 3.058423  | -3.221596 |
| C           | -1.899093               | 3.970065  | -0.868062 |
| C           | 0.134800                | 1.152626  | -0.625244 |
| C           | 0.428579                | 1.977621  | 0.623115  |
| N           | 0.139639                | -0.310550 | -0.341481 |
| C           | 1.267752                | 3.104985  | 0.514218  |
| C           | 1.521975                | 3.920976  | 1.625109  |
| C           | 0.948414                | 3.614330  | 2.868048  |
| C           | 0.127903                | 2.483389  | 2.992300  |
| C           | -0.129065               | 1.669392  | 1.879389  |
| C           | 1.407711                | -1.101943 | -0.296938 |
| C           | 2.597680                | -0.382536 | -0.323442 |
| C           | 3.927655                | -0.962637 | -0.311621 |
| O           | 1.218507                | -2.357590 | -0.230718 |
| C           | 5.055153                | -0.091128 | -0.309882 |
| C           | 6.365112                | -0.578517 | -0.302025 |
| C           | 6.611465                | -1.962718 | -0.297276 |
| C           | 5.515074                | -2.841904 | -0.298744 |
| C           | 4.200625                | -2.361274 | -0.304800 |
| H           | -6.669612               | -1.550508 | 0.535155  |
| H           | -4.999497               | 0.217858  | 0.000828  |
| H           | -3.531906               | -4.531198 | 0.811038  |
| H           | -5.951933               | -3.905214 | 0.938401  |
| H           | -2.492279               | 1.673898  | 0.367141  |
| H           | -3.313633               | 1.175609  | -1.141915 |
| H           | -3.037419               | 2.707989  | -3.129434 |
| H           | -1.492782               | 2.439419  | -3.986484 |
| H           | -2.025091               | 4.097416  | -3.592189 |
| H           | -0.215958               | 3.322673  | -2.044856 |
| H           | -2.976571               | 3.764224  | -0.734734 |
| H           | -1.811737               | 5.000348  | -1.253269 |
| H           | -1.416687               | 3.940483  | 0.121910  |
| H           | -1.158810               | 0.872463  | -2.287017 |
| H           | 0.954782                | 1.302512  | -1.346913 |
| H           | 1.729724                | 3.344707  | -0.450868 |
| H           | 2.177824                | 4.791237  | 1.520078  |
| H           | 1.150060                | 4.246190  | 3.739001  |
| H           | -0.310938               | 2.226177  | 3.961777  |

|   |           |           |           |
|---|-----------|-----------|-----------|
| H | -0.750818 | 0.776346  | 2.004616  |
| H | 2.565006  | 0.707806  | -0.298586 |
| H | 4.882136  | 0.992724  | -0.314272 |
| H | 7.203227  | 0.128465  | -0.299986 |
| H | 7.637005  | -2.347130 | -0.291840 |
| H | 5.686266  | -3.925252 | -0.293835 |
| H | 3.355686  | -3.054444 | -0.301465 |

-----  
 Statistical Thermodynamic Analysis  
 Temperature= 298.150 Kelvin Pressure= 1.00000 Atm  
 =====

SCF Energy= -1625.74443064 Predicted Change= -3.924062D-09  
 Zero-point correction (ZPE)= -1625.2866 0.45773  
 Internal Energy (U)= -1625.2594 0.48498  
 Enthalpy (H)= -1625.2585 0.48592  
 Gibbs Free Energy (G)= -1625.3446 0.39980  
 -----

Frequencies -- 25.5687 26.3653 37.0329

183.15K thermal correction = 0.429069  
 Single point SCF = -1626.123085

### TS-E-(Re,Si): Concerted [2+2] $\beta$ -lactone formation

-----  
 Using Gaussian 09: AM64L-G09RevD.01 24-Apr-2013  
 =====

# pbepbe/6-31G\*/auto gffprint gffinput  
 scf=(direct,tight,maxcycle=300,xqc)  
 SCRF=(PCM,SOLVENT=Dichloromethane)  
 opt=(maxcycle=250,calcfc,ts,noeigentest) freq=noraman  
 iop(1/8=18)  
 Temperature=298.15  
 #N Geom=AllCheck Guess=TCHECK SCRF=Check Test GenChk  
 RPBEPBE/6-31G(d)/Auto  
 Freq  
 -----

Pointgroup= C1 Stoichiometry= C35H30BrF3N2O2S  
 C1[X(C35H30BrF3N2O2S)] #Atoms= 74  
 Charge = 0 Multiplicity = 1  
 -----  
 SCF Energy= -4878.33291875 Predicted Change= -3.251482D-09  
 =====

Optimization completed. {Found 2 times}  
 Item Max Val. Criteria Pass? RMS Val. Criteria  
 Pass?  
 Force 0.00001 || 0.00045 [ YES ] 0.00000 || 0.00030 [ YES ]  
 Displ 0.00179 || 0.00180 [ YES ] 0.00179 || 0.00180 [ YES ]  
 -----

| Atomic Type | Coordinates (Angstroms) |           |           |
|-------------|-------------------------|-----------|-----------|
|             | X                       | Y         | Z         |
| N           | 3.492578                | 1.499507  | -0.138393 |
| C           | 4.122773                | 0.513695  | -1.039012 |
| C           | 3.030551                | -0.297429 | -1.738019 |
| C           | 3.591039                | -1.373872 | -2.707893 |
| C           | 4.726416                | -0.824187 | -3.593168 |
| C           | 2.471022                | -1.937954 | -3.604333 |
| C           | 2.065975                | -0.885071 | -0.674286 |
| C           | 2.659508                | -1.953440 | 0.235021  |
| N           | 1.489995                | 0.249128  | 0.118179  |

|    |           |           |           |
|----|-----------|-----------|-----------|
| C  | 0.121692  | 0.226160  | 0.567470  |
| C  | -0.638744 | -1.088896 | 0.524043  |
| H  | 0.083703  | -1.901329 | 0.356917  |
| C  | -1.365385 | -1.418996 | 1.813833  |
| O  | -0.326898 | 1.265038  | 1.056680  |
| C  | 2.219708  | 1.375193  | 0.312271  |
| S  | 1.656650  | 2.790172  | 1.180086  |
| C  | 3.256138  | 3.530524  | 0.979448  |
| C  | 4.118514  | 2.700181  | 0.238566  |
| C  | 3.684597  | 4.782162  | 1.439877  |
| C  | 4.996718  | 5.177438  | 1.149923  |
| C  | 5.859083  | 4.339693  | 0.415582  |
| C  | 5.435234  | 3.089723  | -0.050431 |
| C  | 3.398592  | -1.644137 | 1.395377  |
| C  | 3.946945  | -2.661969 | 2.189482  |
| C  | 3.763331  | -4.007577 | 1.839965  |
| C  | 3.019092  | -4.329422 | 0.695389  |
| C  | 2.468490  | -3.311851 | -0.096363 |
| C  | -1.239465 | -2.728495 | 2.328823  |
| C  | -1.905113 | -3.117951 | 3.498157  |
| C  | -2.709767 | -2.198365 | 4.188496  |
| C  | -2.840739 | -0.892518 | 3.692801  |
| C  | -2.182239 | -0.505999 | 2.516271  |
| H  | 4.803954  | -0.129109 | -0.451552 |
| H  | 4.719539  | 1.090148  | -1.761103 |
| H  | 4.006195  | -2.199537 | -2.098521 |
| H  | 5.026171  | -1.588380 | -4.330156 |
| H  | 5.628531  | -0.558930 | -3.015673 |
| H  | 4.399212  | 0.069512  | -4.155766 |
| H  | 2.864101  | -2.758139 | -4.229057 |
| H  | 2.087651  | -1.152746 | -4.281007 |
| H  | 1.609321  | -2.326982 | -3.037972 |
| H  | 2.421922  | 0.407831  | -2.338183 |
| H  | 1.177209  | -1.241180 | -1.233665 |
| H  | 3.013596  | 5.430639  | 2.010605  |
| H  | 5.354613  | 6.149272  | 1.501849  |
| H  | 6.881746  | 4.665931  | 0.205662  |
| H  | 6.114089  | 2.440469  | -0.608916 |
| H  | 3.535735  | -0.602445 | 1.705433  |
| H  | 4.513900  | -2.398893 | 3.088356  |
| H  | 4.188410  | -4.801310 | 2.462675  |
| H  | 2.854592  | -5.376540 | 0.421298  |
| H  | 1.863113  | -3.573037 | -0.970077 |
| H  | -0.607178 | -3.451953 | 1.800702  |
| H  | -1.788172 | -4.140050 | 3.874450  |
| H  | -3.227661 | -2.496531 | 5.106374  |
| H  | -3.464832 | -0.164880 | 4.223216  |
| H  | -2.290074 | 0.514144  | 2.142768  |
| C  | -1.413290 | -0.971009 | -0.927257 |
| C  | -1.728919 | -2.432328 | -1.390455 |
| F  | -2.430513 | -2.439877 | -2.554430 |
| F  | -2.438010 | -3.195450 | -0.492183 |
| F  | -0.570814 | -3.133548 | -1.628416 |
| C  | -2.744940 | -0.181110 | -0.791331 |
| O  | -0.545845 | -0.418408 | -1.790434 |
| C  | -3.911041 | -0.638625 | -0.143988 |
| C  | -5.069663 | 0.151718  | -0.099025 |
| C  | -5.053844 | 1.415309  | -0.700866 |
| Br | -6.638066 | 2.502260  | -0.641997 |
| C  | -3.913196 | 1.898822  | -1.352558 |
| C  | -2.771406 | 1.088017  | -1.394608 |
| H  | -3.935458 | -1.625246 | 0.323831  |
| H  | -5.972627 | -0.212832 | 0.398810  |
| H  | -3.921304 | 2.885373  | -1.825229 |
| H  | -1.862106 | 1.406667  | -1.913959 |

Statistical Thermodynamic Analysis  
 Temperature= 298.150 Kelvin Pressure= 1.00000 Atm

SCF Energy= -4878.33291875 Predicted Change= -3.251482D-09  
 Zero-point correction (ZPE)= -4877.7713 0.56153  
 Internal Energy (U)= -4877.7324 0.60044  
 Enthalpy (H)= -4877.7315  
 0.60138  
 Gibbs Free Energy (G)= -4877.8445  
 0.48836

---

Frequencies -- -58.3967 17.2912 22.6303

183.15K thermal correction = 0.526412  
 Single point SCF = -4881.361935

### TS-E-(Re,Re): Concerted [2+2] $\beta$ -lactone formation

Using Gaussian 09: AM64L-G09RevD.01 24-Apr-2013

```
# pbepbe/6-31G(d)/auto scf=(maxcycle=300,direct,tight,xqc)
density=current
opt=(maxcycle=250,modredundant)
SCRF=(PCM,SOLVENT=Dichloromethane)
iop(1/8=18) Temperature=298.15
Modredundant Input: B 10 64 F
Modredundant Input: B 11 58 F
Modredundant Input:
# pbepbe/6-31G(d)/auto scf=(direct,tight,maxcycle=300,xqc)
opt=(nofreeze,maxcycle=250,ts,calcf, noigentest) iop(1/8=18)
freq=noraman
SCRF=(PCM,SOLVENT=Dichloromethane)
Temperature=298.15 geom=check
guess=read output=WFX
#N Geom=AllCheck Guess=TCheck SCRF=Check Test GenChk
RPBEPBE/6-31G(d)/Auto
```

Pointgroup= C1 Stoichiometry= C35H30BrF3N2O2S  
 C1[X(C35H30BrF3N2O2S)] #Atoms= 74  
 Charge = 0 Multiplicity = 1

---

SCF Energy= -4878.32888447 Predicted Change= -1.665278D-08

Optimization completed. {Found 2 times}  

| Item  | Max Val. | Criteria | Pass?   | RMS Val. | Criteria        |
|-------|----------|----------|---------|----------|-----------------|
| Force | 0.00002  | 0.00045  | [ YES ] | 0.00000  | 0.00030 [ YES ] |
| Displ | 0.00201  | 0.00180  | [ NO ]  | 0.00201  | 0.00180 [ YES ] |

| Atomic Type | Coordinates (Angstroms) |           |           |
|-------------|-------------------------|-----------|-----------|
|             | X                       | Y         | Z         |
| N           | -3.958029               | -0.816610 | 0.194805  |
| C           | -3.461464               | -2.203458 | 0.150446  |
| C           | -2.037097               | -2.254337 | 0.705919  |
| C           | -1.445518               | -3.691353 | 0.673947  |
| C           | -2.438914               | -4.739581 | 1.213838  |
| C           | -0.134468               | -3.772872 | 1.477967  |
| C           | -1.154649               | -1.207470 | -0.027896 |
| C           | -0.860807               | -1.510919 | -1.492220 |
| N           | -1.785961               | 0.145517  | 0.127082  |
| C           | -0.992726               | 1.345602  | 0.213838  |
| C           | 0.492717                | 1.276213  | -0.123760 |
| H           | 0.667941                | 0.340531  | -0.675073 |
| C           | 0.910774                | 2.400815  | -1.059530 |

|    |           |           |           |
|----|-----------|-----------|-----------|
| O  | -1.598170 | 2.393360  | 0.444987  |
| C  | -3.133328 | 0.257515  | 0.249170  |
| S  | -3.992036 | 1.770851  | 0.464548  |
| C  | -5.529422 | 0.887676  | 0.418232  |
| C  | -5.324791 | -0.496896 | 0.269500  |
| C  | -6.822425 | 1.416236  | 0.522219  |
| C  | -7.904092 | 0.528449  | 0.466061  |
| C  | -7.695325 | -0.855935 | 0.308210  |
| C  | -6.405521 | -1.390223 | 0.206500  |
| C  | -1.754242 | -1.180419 | -2.531899 |
| C  | -1.451876 | -1.493982 | -3.865117 |
| C  | -0.248831 | -2.140021 | -4.183952 |
| C  | 0.655274  | -2.462647 | -3.160994 |
| C  | 0.353835  | -2.145872 | -1.828801 |
| C  | 0.710621  | 3.770202  | -0.777921 |
| C  | 1.125452  | 4.754166  | -1.685244 |
| C  | 1.753090  | 4.398095  | -2.889521 |
| C  | 1.958310  | 3.042225  | -3.183088 |
| C  | 1.536273  | 2.057600  | -2.278428 |
| H  | -3.510355 | -2.570912 | -0.891152 |
| H  | -4.147919 | -2.801734 | 0.766541  |
| H  | -1.226821 | -3.943768 | -0.381439 |
| H  | -1.947356 | -5.725984 | 1.262983  |
| H  | -3.329889 | -4.854707 | 0.573490  |
| H  | -2.776102 | -4.484916 | 2.235440  |
| H  | 0.634314  | -3.067848 | 1.122590  |
| H  | 0.287581  | -4.790060 | 1.409886  |
| H  | -0.316333 | -3.553556 | 2.545692  |
| H  | -2.077940 | -1.930009 | 1.764856  |
| H  | -0.229910 | -1.090654 | 0.578964  |
| H  | -6.980865 | 2.491839  | 0.641977  |
| H  | -8.923257 | 0.917981  | 0.543206  |
| H  | -8.554706 | -1.530853 | 0.260544  |
| H  | -6.254296 | -2.464224 | 0.072818  |
| H  | -2.688416 | -0.650667 | -2.314798 |
| H  | -2.158411 | -1.223904 | -4.656571 |
| H  | -0.011851 | -2.380392 | -5.225340 |
| H  | 1.605258  | -2.952039 | -3.398606 |
| H  | 1.079045  | -2.380176 | -1.041628 |
| H  | 0.225938  | 4.063912  | 0.154697  |
| H  | 0.958700  | 5.810315  | -1.446515 |
| H  | 2.076707  | 5.171801  | -3.593932 |
| H  | 2.440305  | 2.746738  | -4.121271 |
| H  | 1.690055  | 0.999439  | -2.521814 |
| C  | 1.251269  | 0.946256  | 1.298258  |
| C  | 1.461727  | 2.237098  | 2.156094  |
| F  | 0.284512  | 2.864642  | 2.443764  |
| F  | 2.279647  | 3.193157  | 1.600951  |
| F  | 2.029861  | 1.903691  | 3.350386  |
| C  | 2.669209  | 0.370215  | 0.971931  |
| O  | 0.468373  | 0.094569  | 1.976253  |
| C  | 2.935484  | -0.916140 | 1.469444  |
| C  | 4.156904  | -1.560453 | 1.229240  |
| C  | 5.126828  | -0.892568 | 0.472607  |
| Br | 6.808540  | -1.756205 | 0.123378  |
| C  | 4.901332  | 0.394241  | -0.031273 |
| C  | 3.672774  | 1.022269  | 0.227454  |
| H  | 2.143170  | -1.383966 | 2.063739  |
| H  | 4.355312  | -2.560376 | 1.626341  |
| H  | 5.674319  | 0.902767  | -0.614717 |
| H  | 3.511346  | 2.031454  | -0.158309 |

-----  
Statistical Thermodynamic Analysis  
Temperature= 298.150 Kelvin    Pressure= 1.00000 Atm  
=====

|                              |                |                   |         |
|------------------------------|----------------|-------------------|---------|
| SCF Energy=                  | -4878.32888447 | Predicted Change= | -       |
| 1.665278D-08                 |                |                   |         |
| Zero-point correction (ZPE)= | -4877.7670     |                   | 0.56183 |
| Internal Energy (U)=         | -4877.7283     |                   | 0.60050 |

Enthalpy (H)= -4877.7274  
0.60144  
Gibbs Free Energy (G)= -4877.8390  
0.48985  
-----  
Frequencies -- -27.2345    13.9385    23.0592  
-----  
183.15K thermal correction = 0.527360  
Single point SCF = -4881.359206

**TS-E-(Si,Re): Concerted [2+2]  $\beta$ -lactone formation**

Using Gaussian 09: AM64L-G09RevD.01 24-Apr-2013  
=====

#PBEPBE/6-31G(d)/auto scf=(maxcycle=300,direct,tight)  
density=current  
SCRF=(PCM,SOLVENT=Dichloromethane)  
opt=(maxcycle=250,ts,calcfc,noeigentest) freq=noraman  
#P Geom=AllCheck Guess=TChech SCRF=Check GenChk  
RPBEPBE/6-31G(d)/Auto Freq

Pointgroup= C1    Stoichiometry= C35H30BrF3N2O2S  
C1[X(C35H30BrF3N2O2S)] #Atoms= 74  
Charge = 0    Multiplicity = 1

SCF Energy= -4878.31945868    Predicted Change= -1.076491D-08  
=====

Optimization completed.    {Found 2 times}  
Item    Max Val.    Criteria    Pass?    RMS Val.    Criteria  
Pass?  
Force    0.00002 || 0.00045 [ YES ]    0.00000 || 0.00030 [ YES ]  
Displ    0.00117 || 0.00180 [ YES ]    0.00117 || 0.00180 [ YES ]

| -----                             |          |           |           |
|-----------------------------------|----------|-----------|-----------|
| Atomic    Coordinates (Angstroms) |          |           |           |
| Type                              | X        | Y         | Z         |
| -----                             |          |           |           |
| C                                 | 5.133979 | 4.856932  | 0.209045  |
| H                                 | 6.116025 | 5.290836  | 0.417805  |
| C                                 | 5.015580 | 3.466929  | 0.093159  |
| H                                 | 5.886075 | 2.818205  | 0.218740  |
| C                                 | 3.740663 | 2.943418  | -0.168901 |
| C                                 | 2.617333 | 3.782295  | -0.302158 |
| C                                 | 2.743325 | 5.172791  | -0.191724 |
| H                                 | 1.872962 | 5.826036  | -0.300861 |
| C                                 | 4.014692 | 5.700606  | 0.067305  |
| H                                 | 4.136367 | 6.783363  | 0.163008  |
| N                                 | 3.399121 | 1.589257  | -0.324509 |
| C                                 | 2.079432 | 1.372970  | -0.532166 |
| S                                 | 1.151273 | 2.851353  | -0.658428 |
| C                                 | 4.394380 | 0.502418  | -0.370802 |
| H                                 | 4.669292 | 0.217102  | 0.661109  |
| H                                 | 5.281487 | 0.910238  | -0.876108 |
| C                                 | 3.804613 | -0.674053 | -1.152373 |
| C                                 | 4.798791 | -1.856845 | -1.317412 |
| H                                 | 4.917265 | -2.348375 | -0.333503 |
| C                                 | 6.190056 | -1.375627 | -1.774987 |
| H                                 | 6.702247 | -0.766935 | -1.010828 |
| H                                 | 6.124495 | -0.782002 | -0.780526 |
| H                                 | 6.834862 | -2.246534 | -1.980628 |
| C                                 | 4.261860 | -2.891899 | -2.324269 |
| H                                 | 3.289204 | -3.321606 | -2.030665 |
| H                                 | 4.972730 | -3.729915 | -2.419977 |
| H                                 | 4.139359 | -2.438737 | -3.324774 |
| H                                 | 3.563543 | -0.306938 | -2.170363 |

```

C 2.445609 -1.065840 -0.490910
C 2.572767 -1.616422 0.926671
H 1.971208 -1.822511 -1.135541
N 1.544211 0.127826 -0.581078
C 0.114414 0.007931 -0.781256
C -0.545625 -1.276326 -0.384729
H 0.196003 -1.972536 0.029304
C -1.309109 -1.966252 -1.485910
O -0.471558 0.989297 -1.239058
C 2.476254 -0.796606 2.065853
H 2.201063 0.255351 1.965236
C 2.666671 -1.337120 3.345751
H 2.583758 -0.686058 4.221918
C 2.936232 -2.702994 3.507016
H 3.076560 -3.122361 4.508703
C 3.002663 -3.534227 2.379251
H 3.188920 -4.607068 2.492834
C 2.817489 -2.994382 1.099367
H 2.853442 -3.656888 0.227175
C -2.090318 -1.280549 -2.444270
H -2.143716 -0.189308 -2.409564
C -2.788117 -1.982393 -3.437354
H -3.382664 -1.426406 -4.170790
C -2.733776 -3.383423 -3.494530
H -3.282069 -3.928390 -4.270262
C -1.965964 -4.078611 -2.546499
H -1.910189 -5.172333 -2.578615
C -1.260305 -3.377927 -1.560592
H -0.665430 -3.930202 -0.824074
C -2.778083 1.294354 1.017202
H -1.889749 1.781117 1.432703
C -2.667876 -0.080495 0.743213
C -1.292007 -0.722168 1.075695
C -1.509593 -2.024030 1.920609
F -0.322251 -2.602153 2.259001
F -2.245003 -3.016742 1.306101
F -2.154695 -1.733971 3.087063
C -3.800074 -0.752144 0.237516
H -3.763931 -1.823180 0.028477
C -5.003879 -0.067959 0.007566
H -5.879323 -0.596738 -0.379995
C -5.069609 1.302798 0.282152
Br -6.718171 2.243940 -0.029988
C -3.965820 1.999873 0.788020
H -4.038442 3.069664 1.005483
O -0.439868 0.076906 1.686065

```

```

-----
Statistical Thermodynamic Analysis
Temperature= 298.150 Kelvin Pressure= 1.00000 Atm
-----

```

```

SCF Energy= -4878.31945868 Predicted Change= -
1.076491D-08
Zero-point correction (ZPE)= -4877.7586 0.56078
Internal Energy (U)= -4877.7195 0.59993
Enthalpy (H)= -4877.7185
0.60087
Gibbs Free Energy (G)= -4877.8317
0.48770

```

```

-----
Frequencies -- -194.0867 17.0598 20.3876

```

```

183.15K thermal correction = 0.525778
Single point SCF = -4881.352492

```

**TS-E-(Si,Si): Concerted [2+2]  $\beta$ -lactone formation**

```

-----
Using Gaussian 09: AM64L-G09RevD.01 24-Apr-2013

```

```

=====
# pbe/6-31G*/auto ginput
scf=(direct,tight,maxcycle=300,xqc)
SCRF=(PCM,SOLVENT=Dichloromethane)
opt=(maxcycle=250,calcf,ts,noeigentest) freq=noraman
iop(1/8=18)
Temperature=298.15
#N Geom=AllCheck Guess=TCheck SCRF=Check Test GenChk
RPBEPBE/6-31G(d)/Auto
Freq
-----

```

```

Pointgroup= C1 Stoichiometry= C35H30BrF3N2O2S
C1[X(C35H30BrF3N2O2S)] #Atoms= 74
Charge = 0 Multiplicity = 1
-----

```

```

SCF Energy= -4878.31580133 Predicted Change= -3.857569D-
09
-----

```

```

Optimization completed. {Found 2 times}
Item Max Val. Criteria Pass? RMS Val. Criteria
Pass?
Force 0.00000 || 0.00045 [ YES ] 0.00000 || 0.00030 [
YES ]
Displ 0.00082 || 0.00180 [ YES ] 0.00082 || 0.00180 [
YES ]
-----

```

| Atomic Type | Coordinates (Angstroms) |           |           |
|-------------|-------------------------|-----------|-----------|
|             | X                       | Y         | Z         |
| N           | 3.903297                | 0.632441  | -0.068147 |
| C           | 3.711522                | 1.799566  | 0.812081  |
| C           | 2.703257                | 1.436884  | 1.904422  |
| C           | 2.466229                | 2.589462  | 2.917774  |
| C           | 3.794767                | 3.192915  | 3.416402  |
| C           | 1.644759                | 2.103113  | 4.127117  |
| C           | 1.406223                | 0.906111  | 1.213960  |
| C           | 0.675512                | 1.954445  | 0.380547  |
| N           | 1.781214                | -0.316218 | 0.433308  |
| C           | 0.928909                | -1.488293 | 0.345647  |
| C           | -0.539274               | -1.314685 | 0.585547  |
| H           | -0.756106               | -0.271854 | 0.852891  |
| C           | -1.085604               | -2.213307 | 1.669309  |
| O           | 1.482967                | -2.546434 | 0.050614  |
| C           | 3.017172                | -0.388917 | -0.125792 |
| S           | 3.606597                | -1.757978 | -1.042737 |
| C           | 5.062797                | -0.835364 | -1.455159 |
| C           | 5.068895                | 0.424122  | -0.825712 |
| C           | 6.140514                | -1.244589 | -2.250948 |
| C           | 7.214122                | -0.359475 | -2.411438 |
| C           | 7.212339                | 0.902741  | -1.785506 |
| C           | 6.141805                | 1.314249  | -0.983167 |
| C           | -0.240707               | 2.812555  | 1.023188  |
| C           | -0.863654               | 3.853845  | 0.321276  |
| C           | -0.582947               | 4.049172  | -1.039008 |
| C           | 0.301806                | 3.180619  | -1.694158 |
| C           | 0.918806                | 2.133094  | -0.994316 |
| C           | -1.936303               | -1.655875 | 2.651691  |
| C           | -2.479806               | -2.443598 | 3.675963  |
| C           | -2.174711               | -3.810858 | 3.750475  |
| C           | -1.326893               | -4.377852 | 2.784955  |
| C           | -0.793179               | -3.594222 | 1.754253  |
| H           | 3.375474                | 2.660272  | 0.205417  |
| H           | 4.696820                | 2.031648  | 1.241063  |
| H           | 1.902355                | 3.391404  | 2.405117  |
| H           | 3.592702                | 3.924633  | 4.216563  |
| H           | 4.344888                | 3.725895  | 2.622880  |
| H           | 4.457877                | 2.414590  | 3.836644  |
| H           | 1.482094                | 2.935688  | 4.832004  |

|    |           |           |           |
|----|-----------|-----------|-----------|
| H  | 2.181346  | 1.303343  | 4.669274  |
| H  | 0.650746  | 1.710594  | 3.852477  |
| H  | 3.124285  | 0.583784  | 2.473623  |
| H  | 0.741115  | 0.537602  | 2.009907  |
| H  | 6.140467  | -2.224850 | -2.736045 |
| H  | 8.063874  | -0.654526 | -3.033721 |
| H  | 8.059479  | 1.579445  | -1.929230 |
| H  | 6.141823  | 2.299794  | -0.510557 |
| H  | -0.476873 | 2.664239  | 2.082718  |
| H  | -1.573192 | 4.506973  | 0.839201  |
| H  | -1.065512 | 4.862987  | -1.589982 |
| H  | 0.504597  | 3.305387  | -2.762736 |
| H  | 1.556035  | 1.431680  | -1.538704 |
| H  | -2.175187 | -0.586651 | 2.607683  |
| H  | -3.136098 | -1.983576 | 4.422936  |
| H  | -2.591788 | -4.428588 | 4.552816  |
| H  | -1.082088 | -5.444893 | 2.830707  |
| H  | -0.144012 | -4.049719 | 1.002447  |
| C  | -1.167136 | -1.284623 | -1.048762 |
| C  | -1.468059 | -2.744072 | -1.538750 |
| F  | -2.067586 | -2.681215 | -2.768423 |
| F  | -2.315021 | -3.485989 | -0.746096 |
| F  | -0.345310 | -3.493730 | -1.698190 |
| C  | -2.534745 | -0.531166 | -0.935020 |
| O  | -0.279772 | -0.707837 | -1.822330 |
| C  | -3.662487 | -0.954359 | -0.201593 |
| C  | -4.832699 | -0.179447 | -0.165761 |
| C  | -4.870734 | 1.026311  | -0.875964 |
| Br | -6.471593 | 2.091534  | -0.832114 |
| C  | -3.770091 | 1.471805  | -1.617527 |
| C  | -2.612702 | 0.682734  | -1.637234 |
| H  | -3.645491 | -1.897561 | 0.348488  |
| H  | -5.704079 | -0.512442 | 0.405527  |
| H  | -3.818338 | 2.415889  | -2.168559 |
| H  | -1.719102 | 0.983549  | -2.193849 |

#### Statistical Thermodynamic Analysis

Temperature= 298.150 Kelvin Pressure= 1.00000 Atm

SCF Energy= -4878.31580133 Predicted Change= -3.857569D-09

Zero-point correction (ZPE)= -4877.7547 0.56105

Internal Energy (U)= -4877.7155 0.60024

Enthalpy (H)= -4877.7146

0.60119

Gibbs Free Energy (G)= -4877.8289

0.48684

Frequencies -- -167.4953 11.2703 15.1602

183.15K thermal correction = 0.525374

Single point SCF = -4881.349302

#### F: Product-catalyst complex

Using Gaussian 09: AM64L-G09RevD.01 24-Apr-2013

# pbepbe/6-31G\*/auto gfpint gfinput

scf=(direct,tight,maxcycle=300,xqc)

opt=(maxcycle=250) freq=noraman iop(1/8=18)

Temperature=298.15

SCRF=(PCM,SOLVENT=Dichloromethane)

#N Geom=AllCheck Guess=TCHECK SCRF=Check Test GenChk

RPBEPBE/6-31G(d)/Auto

Freq

Pointgroup= C1 Stoichiometry= C35H30BrF3N2O2S

C1[X(C35H30BrF3N2O2S)] #Atoms= 74

Charge = 0 Multiplicity = 1

SCF Energy= -4878.34350813 Predicted Change= -3.770202D-08

Optimization completed. {Found 1 times}

| Item  | Max Val. | Criteria | Pass?   | RMS Val. | Criteria        |
|-------|----------|----------|---------|----------|-----------------|
| Force | 0.00003  | 0.00045  | [ YES ] | 0.00000  | 0.00030 [ YES ] |
| Displ | 0.00182  | 0.00180  | [ NO ]  | 0.00182  | 0.00180 [ YES ] |

Atomic Coordinates (Angstroms)

| Type | X         | Y         | Z         |
|------|-----------|-----------|-----------|
| N    | 3.683793  | 1.298021  | -0.371778 |
| C    | 4.359937  | 0.131780  | -0.963285 |
| C    | 3.329732  | -0.757796 | -1.664341 |
| C    | 3.953282  | -2.036944 | -2.285695 |
| C    | 5.250136  | -1.734766 | -3.061766 |
| C    | 2.952134  | -2.738803 | -3.223452 |
| C    | 2.159615  | -1.044614 | -0.675073 |
| C    | 2.534812  | -1.925022 | 0.518680  |
| N    | 1.566934  | 0.244218  | -0.245420 |
| C    | 0.037932  | 0.411336  | -0.057951 |
| C    | -0.686748 | -0.833105 | 0.607488  |
| C    | -1.279256 | -0.706763 | 1.983468  |
| O    | -0.251779 | 1.597413  | 0.290251  |
| C    | 2.343271  | 1.321300  | -0.124372 |
| S    | 1.768330  | 2.907441  | 0.394105  |
| C    | 3.450098  | 3.505571  | 0.330518  |
| C    | 4.344571  | 2.510517  | -0.104066 |
| C    | 3.912125  | 4.790557  | 0.637872  |
| C    | 5.283693  | 5.056965  | 0.510697  |
| C    | 6.173680  | 4.054416  | 0.083595  |
| C    | 5.717848  | 2.765644  | -0.229125 |
| C    | 3.096682  | -1.398043 | 1.698841  |
| C    | 3.445808  | -2.239756 | 2.765251  |
| C    | 3.235167  | -3.623116 | 2.673500  |
| C    | 2.664713  | -4.159182 | 1.509503  |
| C    | 2.314931  | -3.316886 | 0.444437  |
| C    | -2.017321 | 0.424089  | 2.397038  |
| C    | -2.540135 | 0.497079  | 3.695914  |
| C    | -2.343974 | -0.555696 | 4.603127  |
| C    | -1.611024 | -1.684271 | 4.205749  |
| C    | -1.082832 | -1.753928 | 2.909123  |
| H    | -0.020823 | -1.710250 | 0.597968  |
| H    | 4.904398  | -0.416395 | -0.171273 |
| H    | 5.095229  | 0.521156  | -1.683466 |
| H    | 4.207712  | -2.729629 | -1.460381 |
| H    | 5.611176  | -2.652406 | -3.556590 |
| H    | 6.063413  | -1.376854 | -2.408069 |
| H    | 5.080214  | -0.977428 | -3.849256 |
| H    | 3.392699  | -3.667928 | -3.623466 |
| H    | 2.702876  | -2.088808 | -4.082081 |
| H    | 2.005116  | -3.009175 | -2.727765 |
| H    | 2.889436  | -0.165784 | -2.491363 |
| H    | 1.357787  | -1.531411 | -1.246298 |
| H    | 3.218410  | 5.568619  | 0.971686  |
| H    | 5.662938  | 6.055148  | 0.749350  |
| H    | 7.241275  | 4.276884  | -0.004490 |
| H    | 6.416921  | 1.988099  | -0.548615 |
| H    | 3.245196  | -0.318671 | 1.807019  |
| H    | 3.876416  | -1.807621 | 3.674346  |
| H    | 3.503624  | -4.278281 | 3.508519  |
| H    | 2.480758  | -5.235614 | 1.430738  |

```

H 1.845654 -3.744059 -0.447960
H -2.154909 1.251014 1.697209
H -3.107225 1.383528 4.000472
H -2.757912 -0.495724 5.615532
H -1.446603 -2.510248 4.906046
H -0.502514 -2.634188 2.606230
C -1.528326 -0.876857 -0.717550
C -2.924739 -0.253863 -0.698880
C -1.609865 -2.281586 -1.354352
F -2.189035 -2.241828 -2.580359
F -2.327686 -3.146127 -0.581937
F -0.375986 -2.856020 -1.522761
O -0.572172 -0.080683 -1.432308
C -3.162842 0.898258 -1.467420
C -4.429842 1.495602 -1.501856
C -5.465781 0.925143 -0.753273
Br -7.205728 1.731802 -0.791223
C -5.258123 -0.219341 0.026030
C -3.984822 -0.804183 0.049211
H -2.331249 1.328468 -2.030893
H -4.607414 2.391941 -2.102239
H -6.076187 -0.647658 0.611275
H -3.825535 -1.694991 0.661778

```

```

-----
Statistical Thermodynamic Analysis
Temperature= 298.150 Kelvin Pressure= 1.00000 Atm
-----

```

```

SCF Energy= -4878.34350813 Predicted Change= -
3.770202D-08
Zero-point correction (ZPE)= -4877.7805 0.56295
Internal Energy (U)= -4877.7414 0.60203
Enthalpy (H)= -4877.7405
0.60298
Gibbs Free Energy (G)= -4877.8543
0.48916

```

```

Frequencies -- 14.8837 22.0917 26.3967

```

```

183.15K thermal correction = 0.527488
Single point SCF = -4881.367879

```

### TS-G: Catalyst release

```

Using Gaussian 09: AM64L-G09RevD.01 24-Apr-2013
-----

```

```

# pbepbe/6-31G(d)/auto scf=(maxcycle=300,direct,tight,xqc)
density=current
opt=(maxcycle=250,modredundant)
SCRF=(PCM,SOLVENT=Dichloromethane)
iop(1/8=18) Temperature=298.15
Modredundant Input: B 9 10 F
Modredundant Input:
# pbepbe/6-31G(d)/auto scf=(direct,tight,maxcycle=300,xqc)
opt=(nofreeze,maxcycle=250,ts,calcfc,noeigentest) iop(1/8=18)
freq=noraman
SCRF=(PCM,SOLVENT=Dichloromethane)
Temperature=298.15 geom=check
guess=read
#N Geom=AllCheck Guess=TCheck SCRF=Check Test GenChk
RPBEPBE/6-31G(d)/Auto
Freq

```

```

-----
Pointgroup= C1 Stoichiometry= C35H30BrF3N2O2S
C1[X(C35H30BrF3N2O2S)] #Atoms= 74
Charge = 0 Multiplicity = 1
-----

```

```

SCF Energy= -4878.33805562 Predicted Change= -3.366135D-
09
-----

```

```

Optimization completed on the basis of negligible forces.
{Found 3 times}
Item Max Val. Criteria Pass? RMS Val. Criteria
Pass?
Force 0.00000 || 0.00045 [ YES ] 0.00000 || 0.00030 [
YES ]
Displ 0.00274 || 0.00180 [ NO ] 0.00274 || 0.00180 [
YES ]
-----

```

| Atomic Type | Coordinates (Angstroms) |           |           |
|-------------|-------------------------|-----------|-----------|
|             | X                       | Y         | Z         |
| N           | 3.913710                | 1.100310  | -0.559937 |
| C           | 4.517652                | -0.164139 | -1.003263 |
| C           | 3.435720                | -1.072683 | -1.599514 |
| C           | 3.982975                | -2.452029 | -2.054030 |
| C           | 5.283308                | -2.323138 | -2.872130 |
| C           | 2.933796                | -3.214476 | -2.886392 |
| C           | 2.239232                | -1.150365 | -0.596061 |
| C           | 2.557400                | -1.893773 | 0.707538  |
| N           | 1.720176                | 0.198878  | -0.329571 |
| C           | -0.214304               | 0.580033  | -0.246615 |
| C           | -0.807433               | -0.435747 | 0.772084  |
| C           | -1.439287               | 0.024075  | 2.054847  |
| O           | -0.285726               | 1.807744  | -0.275290 |
| C           | 2.557205                | 1.200224  | -0.323312 |
| S           | 2.103403                | 2.893928  | 0.038130  |
| C           | 3.806369                | 3.376958  | -0.066525 |
| C           | 4.637273                | 2.287736  | -0.401601 |
| C           | 4.343014                | 4.653980  | 0.126219  |
| C           | 5.730230                | 4.826581  | -0.010513 |
| C           | 6.557448                | 3.738391  | -0.336554 |
| C           | 6.023363                | 2.455764  | -0.535114 |
| C           | 3.070518                | -1.230069 | 1.840710  |
| C           | 3.375885                | -1.936184 | 3.013814  |
| C           | 3.167550                | -3.321271 | 3.081092  |
| C           | 2.644890                | -3.993370 | 1.966373  |
| C           | 2.339902                | -3.285611 | 0.794981  |
| C           | -2.111566               | 1.259459  | 2.165713  |
| C           | -2.690329               | 1.646081  | 3.382514  |
| C           | -2.614517               | 0.805652  | 4.503864  |
| C           | -1.947479               | -0.425074 | 4.405451  |
| C           | -1.361274               | -0.807845 | 3.191286  |
| H           | -0.063048               | -1.219378 | 0.985762  |
| H           | 5.029940                | -0.649864 | -0.150407 |
| H           | 5.274815                | 0.085592  | -1.762780 |
| H           | 4.210952                | -3.044594 | -1.146889 |
| H           | 5.589272                | -3.313241 | -3.251610 |
| H           | 6.123179                | -1.928939 | -2.275210 |
| H           | 5.140763                | -1.660640 | -3.745862 |
| H           | 3.316563                | -4.211731 | -3.163335 |
| H           | 2.709816                | -2.669431 | -3.821767 |
| H           | 1.979743                | -3.361681 | -2.353232 |
| H           | 3.036871                | -0.560606 | -2.498514 |
| H           | 1.415732                | -1.675077 | -1.102462 |
| H           | 3.695911                | 5.498902  | 0.381058  |
| H           | 6.166204                | 5.818429  | 0.141752  |
| H           | 7.637155                | 3.885903  | -0.435943 |
| H           | 6.674471                | 1.611897  | -0.779050 |
| H           | 3.217255                | -0.145694 | 1.822070  |
| H           | 3.770828                | -1.396268 | 3.880797  |
| H           | 3.401277                | -3.871344 | 3.998513  |
| H           | 2.463586                | -5.072517 | 2.008529  |
| H           | 1.913736                | -3.823676 | -0.057544 |
| H           | -2.161654               | 1.921917  | 1.297713  |
| H           | -3.204383               | 2.610495  | 3.454062  |



|    |           |           |           |
|----|-----------|-----------|-----------|
| H  | -3.069686 | 1.110578  | 5.452179  |
| H  | -1.877479 | -1.085742 | 5.275992  |
| H  | -0.834043 | -1.766652 | 3.118818  |
| C  | -1.634369 | -0.906556 | -0.488193 |
| C  | -3.050816 | -0.357156 | -0.628318 |
| C  | -1.630916 | -2.427196 | -0.742162 |
| F  | -2.243522 | -2.737272 | -1.911049 |
| F  | -2.278027 | -3.085732 | 0.260149  |
| F  | -0.371599 | -2.948469 | -0.802433 |
| O  | -0.702465 | -0.241644 | -1.381650 |
| C  | -3.338312 | 0.550370  | -1.662634 |
| C  | -4.628581 | 1.072459  | -1.824908 |
| C  | -5.635794 | 0.675540  | -0.938163 |
| Br | -7.403000 | 1.385369  | -1.145480 |
| C  | -5.377090 | -0.225153 | 0.102432  |
| C  | -4.082323 | -0.737607 | 0.253373  |
| H  | -2.535190 | 0.855770  | -2.337967 |
| H  | -4.844820 | 1.778740  | -2.630812 |
| H  | -6.172939 | -0.520293 | 0.791052  |
| H  | -3.883646 | -1.434678 | 1.071157  |

#### Statistical Thermodynamic Analysis

Temperature= 298.150 Kelvin Pressure= 1.00000 Atm

```

=====
SCF Energy= -4878.33805562 Predicted Change= -
3.366135D-09
Zero-point correction (ZPE)= -4877.7767 0.56133
Internal Energy (U)= -4877.7376 0.60045
Enthalpy (H)= -4877.7366
0.60139
Gibbs Free Energy (G)= -4877.8519
0.48615
=====
Frequencies -- -120.1402 11.2233 15.2962

```

183.15K thermal correction = 0.525055

Single point SCF = -4881.361479

#### H: Major Product

Using Gaussian 09: AM64L-G09RevD.01 24-Apr-2013

```

=====
# pbepbe/6-31G*/auto gfpint gfinput
scf=(direct,tight,maxcycle=300,xqc)
opt=(maxcycle=250) freq=noraman iop(1/8=18)
Temperature=298.15
SCRF=(PCM,SOLVENT=Dichloromethane)
#N Geom=AllCheck Guess=TCheck SCRF=Check Test GenChk
RPBEPBE/6-31G(d)/Auto
Freq

```

Pointgroup= C1 Stoichiometry= C16H10BrF3O2  
 C1[X(C16H10BrF3O2)] #Atoms= 32  
 Charge = 0 Multiplicity = 1

```

=====
SCF Energy= -3635.82363720 Predicted Change= -2.628166D-
08

```

```

=====
Optimization completed. {Found 1 times}
Item Max Val. Criteria Pass? RMS Val. Criteria
Pass?
Force 0.00005 || 0.00045 [ YES ] 0.00000 || 0.00030 [
YES ]
Displ 0.00213 || 0.00180 [ NO ] 0.00213 || 0.00180 [
YES ]

```

Atomic Coordinates (Angstroms)

| Type | X         | Y         | Z         |
|------|-----------|-----------|-----------|
| C    | -2.818399 | -0.361377 | 1.535626  |
| C    | -2.494213 | 0.152116  | 0.128198  |
| C    | -2.025293 | 1.572147  | -0.048204 |
| O    | -3.516316 | -0.050911 | 2.467277  |
| C    | -2.302853 | 2.248924  | -1.251947 |
| C    | -1.862455 | 3.565233  | -1.446921 |
| C    | -1.145977 | 4.222612  | -0.435769 |
| C    | -0.871324 | 3.558138  | 0.769546  |
| C    | -1.306781 | 2.240712  | 0.962757  |
| C    | -1.481988 | -1.060538 | 0.131179  |
| C    | 0.003136  | -0.784486 | 0.110789  |
| C    | -1.886350 | -2.175222 | -0.853913 |
| F    | -1.179103 | -3.307855 | -0.637000 |
| F    | -1.669964 | -1.775114 | -2.135618 |
| F    | -3.204941 | -2.478289 | -0.734090 |
| O    | -1.960053 | -1.455429 | 1.472590  |
| C    | 0.803149  | -1.145748 | 1.208928  |
| C    | 2.183789  | -0.906232 | 1.196367  |
| C    | 2.757630  | -0.302602 | 0.071547  |
| Br   | 4.640235  | 0.033265  | 0.044796  |
| C    | 1.980867  | 0.065413  | -1.034766 |
| C    | 0.602860  | -0.178175 | -1.010777 |
| H    | -3.343711 | -0.054682 | -0.545144 |
| H    | -2.867990 | 1.738883  | -2.040543 |
| H    | -2.086222 | 4.078955  | -2.387366 |
| H    | -0.806735 | 5.252916  | -0.584007 |
| H    | -0.318257 | 4.067809  | 1.564985  |
| H    | -1.091454 | 1.733610  | 1.909658  |
| H    | 0.344584  | -1.614404 | 2.083607  |
| H    | 2.802504  | -1.187393 | 2.052388  |
| H    | 2.443221  | 0.541097  | -1.903291 |
| H    | -0.001958 | 0.115496  | -1.872537 |

#### Statistical Thermodynamic Analysis

Temperature= 298.150 Kelvin Pressure= 1.00000 Atm

```

=====
SCF Energy= -3635.82363720 Predicted Change= -
2.628166D-08
Zero-point correction (ZPE)= -3635.6047 0.21892
Internal Energy (U)= -3635.5858 0.23781
Enthalpy (H)= -3635.5848
0.23875
Gibbs Free Energy (G)= -3635.6549
0.16870
=====
Frequencies -- 22.5887 33.6879 38.7222

```

183.15K thermal correction = 0.193071

Single point SCF = -3638.589695

## Stepwise Mechanism Coordinate Diagram: M06-2X

#### SM: Phenylacetic anhydride

Using Gaussian 09: AM64L-G09RevD.01 24-Apr-2013

```

=====
#m062X/6-31G(d) scf=(direct,tight,maxcycle=300,xqc)
SCRF=(PCM,SOLVENT=CH2Cl2) opt=(maxcycle=250,gdiis)
iop(1/8=18)
freq=noraman temp=298.15
#N Geom=AllCheck Guess=TCheck SCRF=Check Test GenChk
RM062X/6-31G(d) Freq

```

-----  
Pointgroup= C1 Stoichiometry= C16H14O3  
C1[X(C16H14O3)] #Atoms= 33  
Charge = 0 Multiplicity = 1  
-----

SCF Energy= -843.486915789 Predicted Change= -3.820527D-09  
=====

Optimization completed. {Found 1 times}  
Item Max Val. Criteria Pass? RMS Val. Criteria  
Pass?  
Force 0.00001 || 0.00045 [ YES ] 0.00000 || 0.00030 [ YES ]  
Displ 0.00231 || 0.00180 [ NO ] 0.00231 || 0.00180 [ YES ]  
-----

| Atomic Type | Coordinates (Angstroms) |           |           |
|-------------|-------------------------|-----------|-----------|
|             | X                       | Y         | Z         |
| C           | -0.595515               | 2.145332  | -0.692303 |
| C           | -2.079794               | 1.955837  | -0.480554 |
| C           | -2.375875               | 0.503949  | -0.166258 |
| O           | 0.079189                | 1.773280  | 0.448236  |
| C           | 1.441701                | 1.972420  | 0.584699  |
| C           | 2.028653                | 0.874869  | 1.438034  |
| C           | 2.057399                | -0.428005 | 0.659573  |
| O           | 2.022292                | 2.895958  | 0.097143  |
| O           | -0.057733               | 2.495045  | -1.702311 |
| C           | -2.276377               | -0.456548 | -1.175441 |
| C           | -2.489986               | -1.802235 | -0.890935 |
| C           | -2.800560               | -2.201456 | 0.408357  |
| C           | -2.901271               | -1.247391 | 1.419126  |
| C           | -2.688827               | 0.099698  | 1.131895  |
| C           | 3.236666                | -0.837091 | 0.034358  |
| C           | 3.276429                | -2.025451 | -0.691390 |
| C           | 2.133499                | -2.813575 | -0.800044 |
| C           | 0.951232                | -2.405748 | -0.185072 |
| C           | 0.909347                | -1.215871 | 0.537429  |
| H           | -2.581118               | 2.283088  | -1.393637 |
| H           | -2.394275               | 2.598433  | 0.347652  |
| H           | 1.412928                | 0.770661  | 2.336883  |
| H           | 3.035010                | 1.182300  | 1.726788  |
| H           | -2.026127               | -0.147432 | -2.187697 |
| H           | -2.408935               | -2.540318 | -1.683320 |
| H           | -2.966920               | -3.251080 | 0.630540  |
| H           | -3.146825               | -1.550489 | 2.432318  |
| H           | -2.763627               | 0.842536  | 1.921803  |
| H           | 4.129991                | -0.223817 | 0.120808  |
| H           | 4.201006                | -2.334763 | -1.169219 |
| H           | 2.163316                | -3.741986 | -1.362004 |
| H           | 0.054804                | -3.013218 | -0.263890 |
| H           | -0.019536               | -0.900585 | 1.009598  |

-----  
Statistical Thermodynamic Analysis  
Temperature= 298.150 Kelvin Pressure= 1.00000 Atm  
=====

SCF Energy= -843.486915789 Predicted Change= -3.820527D-09  
Zero-point correction (ZPE)= -843.2210 0.26584  
Internal Energy (U)= -843.2049 0.28198  
Enthalpy (H)= -843.2039 0.28292  
Gibbs Free Energy (G)= -843.2679 0.21898  
-----

Frequencies -- 22.6069 28.6918 36.3447

183.15K thermal correction = 0.241399

Single point SCF = -843.767988

### SM: HyperBTM

Using Gaussian 09: AM64L-G09RevD.01 24-Apr-2013  
=====

#m062X/6-31G(d) scf=(direct,tight,maxcycle=300,xqc)  
SCRF=(PCM,SOLVENT=CH2Cl2) opt=(maxcycle=250,gdiis)  
iop(1/8=18)  
freq=noraman temp=298.15  
#N Geom=AllCheck Guess=TCheck SCRF=Check Test GenChk  
RM062X/6-31G(d) Freq  
-----

Pointgroup= C1 Stoichiometry= C19H20N2S  
C1[X(C19H20N2S)] #Atoms= 42  
Charge = 0 Multiplicity = 1  
-----

SCF Energy= -1243.38846090 Predicted Change= -4.688311D-09  
=====

Optimization completed. {Found 2 times}  
Item Max Val. Criteria Pass? RMS Val. Criteria  
Pass?  
Force 0.00002 || 0.00045 [ YES ] 0.00000 || 0.00030 [ YES ]  
Displ 0.00068 || 0.00180 [ YES ] 0.00068 || 0.00180 [ YES ]  
-----

| Atomic Type | Coordinates (Angstroms) |           |           |
|-------------|-------------------------|-----------|-----------|
|             | X                       | Y         | Z         |
| C           | 4.268659                | 0.778416  | -1.761556 |
| H           | 4.685834                | 1.287067  | -2.624624 |
| C           | 2.913987                | 0.938619  | -1.468712 |
| H           | 2.279845                | 1.555938  | -2.096148 |
| C           | 2.393891                | 0.279654  | -0.358831 |
| C           | 3.216277                | -0.535918 | 0.433783  |
| C           | 4.561599                | -0.692359 | 0.138996  |
| H           | 5.191727                | -1.322522 | 0.758345  |
| C           | 5.086896                | -0.024675 | -0.969250 |
| H           | 6.137912                | -0.137601 | -1.212610 |
| N           | 1.080211                | 0.321755  | 0.091078  |
| C           | 0.804302                | -0.458551 | 1.198570  |
| S           | 2.299800                | -1.262633 | 1.753510  |
| C           | 0.046857                | 1.171565  | -0.484829 |
| H           | -0.349705               | 0.716713  | -1.403878 |
| H           | 0.513671                | 2.124029  | -0.750947 |
| C           | -1.066086               | 1.397002  | 0.540958  |
| C           | -2.245401               | 2.178898  | -0.064401 |
| C           | -3.241476               | 2.603065  | 1.018486  |
| H           | -2.753194               | 3.262222  | 1.746472  |
| H           | -3.661405               | 1.755070  | 1.565103  |
| H           | -4.075290               | 3.154530  | 0.573146  |
| H           | -2.760038               | 1.518728  | -0.776034 |
| C           | -1.772951               | 3.422655  | -0.825036 |
| H           | -1.157868               | 4.061667  | -0.179272 |
| H           | -2.634208               | 4.011639  | -1.154620 |
| H           | -1.187671               | 3.171066  | -1.714341 |
| H           | -0.638365               | 2.005685  | 1.351940  |
| C           | -1.465843               | 0.044348  | 1.189838  |
| C           | -2.206301               | -0.879998 | 0.232102  |
| H           | -2.145230               | 0.262754  | 2.019998  |
| N           | -0.311223               | -0.640565 | 1.779908  |
| C           | -1.524389               | -1.673177 | -0.696633 |
| H           | -0.437603               | -1.671915 | -0.719797 |
| C           | -2.221229               | -2.485467 | -1.587940 |
| H           | -1.672513               | -3.093996 | -2.300510 |

|   |           |           |           |
|---|-----------|-----------|-----------|
| C | -3.613495 | -2.525901 | -1.560566 |
| H | -4.156337 | -3.162247 | -2.252687 |
| C | -4.303160 | -1.752056 | -0.630747 |
| H | -5.387731 | -1.785203 | -0.589822 |
| C | -3.602403 | -0.940645 | 0.258481  |
| H | -4.149947 | -0.352674 | 0.990943  |

-----  
Statistical Thermodynamic Analysis  
Temperature= 298.150 Kelvin Pressure= 1.00000 Atm  
=====

SCF Energy= -1243.38846090 Predicted Change= -  
4.688311D-09  
Zero-point correction (ZPE)= -1243.0339 0.35455  
Internal Energy (U)= -1243.0154 0.37304  
Enthalpy (H)= -1243.0144  
0.37398  
Gibbs Free Energy (G)= -1243.0808  
0.30765

-----  
Frequencies -- 31.2209 37.3057 62.4494

183.15K thermal correction = 0.330526  
Single point SCF = -1243.687102

**SM: N,N-diisopropylethylamine**

-----  
Using Gaussian 09: AM64L-G09RevD.01 24-Apr-2013  
=====

#m062X/6-31G(d) scf=(direct,tight,maxcycle=300,xqc)  
SCRF=(PCM,SOLVENT=CH2Cl2) opt=(maxcycle=250,gdiis)  
iop(1/8=18)  
freq=norman temp=298.15  
#N Geom=AllCheck Guess=TCheck SCRF=Check Test GenChk  
RM062X/6-31G(d) Freq

-----  
Pointgroup= C1 Stoichiometry= C8H19N C1[X(C8H19N)]  
#Atoms= 28  
Charge = 0 Multiplicity = 1

-----  
SCF Energy= -370.843938747 Predicted Change= -3.133830D-  
08

-----  
Optimization completed. {Found 1 times}  
Item Max Val. Criteria Pass? RMS Val. Criteria  
Pass?  
Force 0.00000 || 0.00045 [ YES ] 0.00000 || 0.00030 [ YES ]  
Displ 0.00335 || 0.00180 [ NO ] 0.00335 || 0.00180 [ YES ]

-----  
Atomic Coordinates (Angstroms)  
Type X Y Z

|   |           |           |           |
|---|-----------|-----------|-----------|
| N | -0.002078 | 0.271983  | -0.216425 |
| C | 1.033848  | -0.771828 | -0.199573 |
| C | 2.121484  | -0.430091 | -1.219155 |
| C | 1.665046  | -1.064310 | 1.171263  |
| C | -1.384017 | -0.197054 | -0.056551 |
| C | -1.647176 | -1.067090 | 1.180399  |
| C | -1.868572 | -0.898517 | -1.326005 |
| C | 0.311186  | 1.454585  | 0.578273  |
| C | -0.271193 | 2.731235  | -0.022839 |
| H | 1.684488  | -0.313212 | -2.214472 |
| H | 2.885849  | -1.213505 | -1.256290 |
| H | 2.620152  | 0.509765  | -0.954110 |
| H | 0.547169  | -1.693820 | -0.538197 |

|   |           |           |           |
|---|-----------|-----------|-----------|
| H | 2.314227  | -1.943161 | 1.099619  |
| H | 0.911008  | -1.260266 | 1.937432  |
| H | 2.284600  | -0.227519 | 1.510904  |
| H | -1.989769 | 0.710099  | 0.053370  |
| H | -2.719384 | -1.266363 | 1.278173  |
| H | -1.312263 | -0.573513 | 2.098695  |
| H | -1.135893 | -2.033217 | 1.101436  |
| H | -1.710778 | -0.255621 | -2.196367 |
| H | -2.935034 | -1.133764 | -1.249234 |
| H | -1.336741 | -1.841284 | -1.495621 |
| H | 1.399794  | 1.564328  | 0.606665  |
| H | -0.013635 | 1.351184  | 1.629644  |
| H | 0.101929  | 2.863812  | -1.042409 |
| H | 0.019401  | 3.601635  | 0.573688  |
| H | -1.364202 | 2.708953  | -0.062824 |

-----  
Statistical Thermodynamic Analysis  
Temperature= 298.150 Kelvin Pressure= 1.00000 Atm  
=====

SCF Energy= -370.843938747 Predicted Change= -  
3.133830D-08  
Zero-point correction (ZPE)= -370.5788 0.26513  
Internal Energy (U)= -370.5668 0.27709  
Enthalpy (H)= -370.5658  
0.27804  
Gibbs Free Energy (G)= -370.6154  
0.22845

-----  
Frequencies -- 59.1858 78.9225 119.5055

183.15K thermal correction = 0.245883  
Single point SCF = -370.964021

**SM: 4'-bromo-2,2,2-trifluoroacetophenone**

-----  
Using Gaussian 09: AM64L-G09RevD.01 24-Apr-2013  
=====

#m062X/6-31G(d) scf=(direct,tight,maxcycle=300,xqc)  
SCRF=(PCM,SOLVENT=CH2Cl2) opt=(maxcycle=250,gdiis)  
iop(1/8=18)  
freq=norman temp=298.15  
#N Geom=AllCheck Guess=TCheck SCRF=Check Test GenChk  
RM062X/6-31G(d) Freq

-----  
Pointgroup= C1 Stoichiometry= C8H4BrF3O  
C1[X(C8H4BrF3O)] #Atoms= 17  
Charge = 0 Multiplicity = 1

-----  
SCF Energy= -3253.53921686 Predicted Change= -8.971030D-  
10

-----  
Optimization completed. {Found 2 times}  
Item Max Val. Criteria Pass? RMS Val. Criteria  
Pass?  
Force 0.00001 || 0.00045 [ YES ] 0.00000 || 0.00030 [ YES ]  
Displ 0.00029 || 0.00180 [ YES ] 0.00029 || 0.00180 [ YES ]

-----  
Atomic Coordinates (Angstroms)  
Type X Y Z

|   |           |           |           |
|---|-----------|-----------|-----------|
| C | -0.851525 | 0.487350  | -0.000018 |
| C | -2.303281 | 0.784451  | -0.000039 |
| O | -2.767681 | 1.899333  | -0.000129 |
| C | -3.284834 | -0.409566 | 0.000031  |

|    |           |           |           |
|----|-----------|-----------|-----------|
| F  | -4.542343 | 0.009912  | 0.000099  |
| F  | -3.093733 | -1.176350 | 1.081920  |
| F  | -3.093856 | -1.176363 | -1.081875 |
| C  | 0.025072  | 1.578451  | 0.000046  |
| C  | 1.396855  | 1.378392  | 0.000057  |
| C  | 1.884013  | 0.072853  | -0.000004 |
| Br | 3.750092  | -0.214287 | 0.000007  |
| C  | 1.030814  | -1.026163 | -0.000073 |
| C  | -0.342688 | -0.816307 | -0.000077 |
| H  | -0.384395 | 2.583202  | 0.000088  |
| H  | 2.082348  | 2.218012  | 0.000112  |
| H  | 1.435680  | -2.031533 | -0.000124 |
| H  | -1.002572 | -1.675852 | -0.000130 |

-----  
Statistical Thermodynamic Analysis  
Temperature= 298.150 Kelvin    Pressure= 1.00000 Atm  
=====

|                              |                |                   |         |
|------------------------------|----------------|-------------------|---------|
| SCF Energy=                  | -3253.53921686 | Predicted Change= | -       |
| 8.971030D-10                 |                |                   |         |
| Zero-point correction (ZPE)= | -3253.4321     |                   | 0.10704 |
| Internal Energy (U)=         | -3253.4211     |                   | 0.11805 |
| Enthalpy (H)=                |                | -3253.4202        |         |
| 0.11900                      |                |                   |         |
| Gibbs Free Energy (G)=       |                | -3253.4714        |         |
| 0.06779                      |                |                   |         |

-----  
Frequencies --    38.5459            70.3361            89.3870  
-----

183.15K thermal correction = 0.086010  
Single point SCF = -3256.175110

**TS-A: HBTM addition to phenylacetic anhydride (Re-face)**

-----  
Using Gaussian 09: AM64L-G09RevD.01 24-Apr-2013  
=====

```
#m062x/6-31G(d) scf=(maxcycle=300,direct,tight)
density=current
SCRFF=(PCM,SOLVENT=CH2Cl2)
opt=(maxcycle=250,ts,calcfc, noeigenest,gdiis)
iop(1/8=18) freq=norman temp=298.15
#N Geom=AllCheck Guess=TCheck SCRFF=Check Test GenChk
RM062X/6-31G(d) Freq
```

-----  
Pointgroup= C1    Stoichiometry= C35H34N2O3S  
C1[X(C35H34N2O3S)] #Atoms= 75  
Charge = 0            Multiplicity = 1  
-----

|             |                |                   |               |
|-------------|----------------|-------------------|---------------|
| SCF Energy= | -2086.88262490 | Predicted Change= | -1.992655D-09 |
|-------------|----------------|-------------------|---------------|

-----  
Optimization completed.    {Found 1 times}  
Item    Max Val.    Criteria    Pass?    RMS Val.    Criteria  
Pass?  
Force    0.00000 || 0.00045    [ YES ]    0.00000 || 0.00030    [ YES ]  
Displ    0.00219 || 0.00180    [ NO ]    0.00219 || 0.00180    [ YES ]  
-----

| Atomic Coordinates (Angstroms) |          |           |           |
|--------------------------------|----------|-----------|-----------|
| Type                           | X        | Y         | Z         |
| C                              | 6.626453 | 0.092023  | -0.225795 |
| C                              | 5.414762 | -0.566274 | -0.024045 |
| C                              | 4.240543 | 0.144412  | -0.251540 |
| C                              | 4.272367 | 1.480049  | -0.658200 |
| C                              | 5.481728 | 2.130563  | -0.862864 |

|   |           |           |           |
|---|-----------|-----------|-----------|
| C | 6.663221  | 1.423504  | -0.641774 |
| N | 2.937635  | -0.331765 | -0.108110 |
| C | 1.955244  | 0.588265  | -0.338030 |
| S | 2.649005  | 2.133805  | -0.877561 |
| C | 2.627297  | -1.724122 | 0.200763  |
| C | 1.192845  | -2.038215 | -0.215043 |
| C | 0.776343  | -3.460420 | 0.195047  |
| C | -0.574623 | -3.827920 | -0.422104 |
| C | 1.824035  | -4.497769 | -0.221977 |
| C | 0.252882  | -0.932088 | 0.323271  |
| C | 0.090706  | -0.945250 | 1.836362  |
| N | 0.698158  | 0.378199  | -0.153767 |
| C | 1.020958  | -0.337953 | 2.685299  |
| C | 0.850883  | -0.378673 | 4.067131  |
| C | -0.254965 | -1.020866 | 4.619910  |
| C | -1.194061 | -1.617393 | 3.781896  |
| C | -1.022469 | -1.575360 | 2.400291  |
| C | -0.518677 | 1.714800  | -0.639825 |
| C | -1.000206 | 2.116875  | 0.752101  |
| C | -2.191649 | 3.042366  | 0.667314  |
| O | -1.550571 | 0.860216  | -1.185755 |
| C | -1.339301 | 0.144245  | -2.306244 |
| C | -2.648408 | -0.433854 | -2.813422 |
| C | -3.193444 | -1.520003 | -1.904436 |
| O | -0.262555 | -0.047122 | -2.813521 |
| O | 0.046056  | 2.500619  | -1.394264 |
| C | -2.078846 | 4.302711  | 0.071521  |
| C | -3.182455 | 5.146538  | -0.011764 |
| C | -4.415957 | 4.742738  | 0.498815  |
| C | -4.537713 | 3.489206  | 1.092792  |
| C | -3.430772 | 2.646133  | 1.174272  |
| C | -3.612530 | -1.232086 | -0.599857 |
| C | -4.129023 | -2.238737 | 0.212817  |
| C | -4.237329 | -3.544661 | -0.265384 |
| C | -3.825911 | -3.837062 | -1.562687 |
| C | -3.305551 | -2.830009 | -2.373910 |
| H | 7.553920  | -0.443558 | -0.052286 |
| H | 5.390723  | -1.598768 | 0.307739  |
| H | 5.504354  | 3.166652  | -1.185037 |
| H | 7.617632  | 1.916433  | -0.792446 |
| H | 2.782689  | -1.911903 | 1.272028  |
| H | 3.330747  | -2.341382 | -0.363367 |
| H | -0.869232 | -4.839863 | -0.125956 |
| H | -0.511347 | -3.803397 | -1.517082 |
| H | -1.383318 | -3.152573 | -0.127447 |
| H | 0.685874  | -3.486571 | 1.289672  |
| H | 2.768810  | -4.379537 | 0.316751  |
| H | 2.030758  | -4.429140 | -1.297149 |
| H | 1.454010  | -5.506798 | -0.016934 |
| H | 1.139880  | -1.965687 | -1.311210 |
| H | -0.738829 | -1.089953 | -0.113110 |
| H | 1.876660  | 0.189950  | 2.270866  |
| H | 1.580984  | 0.100035  | 4.712540  |
| H | -0.388942 | -1.047011 | 5.696783  |
| H | -2.067244 | -2.107387 | 4.201947  |
| H | -1.768937 | -2.024748 | 1.748676  |
| H | -0.150879 | 2.606934  | 1.240258  |
| H | -1.259560 | 1.226514  | 1.330090  |
| H | -2.464361 | -0.833527 | -3.812032 |
| H | -3.369442 | 0.387110  | -2.889582 |
| H | -1.119723 | 4.609674  | -0.335351 |
| H | -3.079695 | 6.123261  | -0.475436 |
| H | -5.275791 | 5.402755  | 0.435726  |
| H | -5.493537 | 3.165400  | 1.493912  |
| H | -3.526541 | 1.669707  | 1.644542  |
| H | -3.536226 | -0.214075 | -0.227180 |
| H | -4.454174 | -1.999464 | 1.221578  |
| H | -4.642920 | -4.326198 | 0.369653  |
| H | -3.907076 | -4.849464 | -1.946710 |
| H | -2.985591 | -3.063319 | -3.386220 |

```

-----
Statistical Thermodynamic Analysis
Temperature= 298.150 Kelvin   Pressure= 1.00000 Atm
=====
SCF Energy= -2086.88262490   Predicted Change= -
1.992655D-09
Zero-point correction (ZPE)= -2086.2603   0.62226
Internal Energy (U)= -2086.2253   0.65727
Enthalpy (H)= -2086.2244
0.65822
Gibbs Free Energy (G)= -2086.3297
0.55288
-----
Frequencies -- -152.9058   10.4007   14.7433

183.15K thermal correction = 0.588518
Single point SCF = -2087.457250

```

**B: Acylated-HBTM phenylacetate complex**

```

-----
Using Gaussian 09: AM64L-G09RevD.01 24-Apr-2013
=====
#m062x/6-31G(d) gfpint gfinput
scf=(direct,tight,maxcycle=300,xqc)
#opt=(maxcycle=250,gdiis) iop(1/8=18) freq=noraman
temp=298.15
SCRF=(PCM,SOLVENT=dichloromethane)
#N Geom=AllCheck Guess=TCheck SCRF=Check Test GenChk
RM062X/6-31G(d) Freq
-----
Pointgroup= C1   Stoichiometry= C35H34N2O3S
C1[X(C35H34N2O3S)] #Atoms= 75
Charge = 0       Multiplicity = 1
-----
SCF Energy= -2086.89719461   Predicted Change= -1.388801D-
08
=====
Optimization completed.   {Found 2 times}
Item Max Val. Criteria Pass? RMS Val. Criteria
Pass?
Force 0.00002 || 0.00045 [ YES ] 0.00000 || 0.00030 [
YES ]
Displ 0.00110 || 0.00180 [ YES ] 0.00110 || 0.00180 [
YES ]
-----
Atomic Coordinates (Angstroms)
Type X Y Z
-----
C 4.465086 2.889723 1.173290
C 3.351356 2.108725 1.451073
C 2.477599 1.838399 0.400026
C 2.694736 2.347714 -0.876600
C 3.813975 3.129216 -1.153494
C 4.699028 3.390382 -0.114755
N 1.333080 1.035460 0.451659
C 0.665259 0.958222 -0.703988
S 1.423314 1.863848 -1.981816
C 0.988656 0.268313 1.656300
C 0.049211 -0.866800 1.289002
C -0.459130 -1.623181 2.529806
C -1.196127 -2.900195 2.115387
C 0.694149 -1.987179 3.470538
C -1.086646 -0.325080 0.398807
C -2.009670 0.667366 1.090957
N -0.488294 0.278608 -0.818066
C -1.781767 2.046275 1.075790

```

```

C -2.650195 2.916552 1.731292
C -3.759783 2.421343 2.409719
C -3.996705 1.048890 2.426771
C -3.129233 0.181856 1.771386
C -1.111820 0.195689 -2.101676
C -2.245316 -0.779885 -2.280076
C -3.531618 -0.374032 -1.590085
O 0.644231 -1.660816 -2.585026
C 0.601814 -2.596115 -1.750417
C 1.923519 -3.375691 -1.534854
C 2.837920 -2.584282 -0.633754
O -0.373088 -2.939742 -1.033652
O -0.738626 0.945742 -2.975708
C -4.336332 -1.352258 -1.003590
C -5.533436 -1.005363 -0.380451
C -5.928362 0.328636 -0.322986
C -5.126956 1.312219 -0.899972
C -3.940748 0.961274 -1.537145
C 3.409156 -1.385124 -1.083679
C 4.256261 -0.649068 -0.261186
C 4.526240 -1.080473 1.039583
C 3.946979 -2.258002 1.504310
C 3.112448 -3.004467 0.669716
H 5.166898 3.111854 1.969919
H 3.177686 1.714679 2.446198
H 3.987505 3.519262 -2.150700
H 5.580193 3.993557 -0.304834
H 0.549131 0.954573 2.391091
H 1.931389 -0.126541 2.043619
H -1.518934 -3.453041 3.002904
H -0.537798 -3.536498 1.515191
H -2.082569 -2.702647 1.504550
H -1.148833 -0.968720 3.080026
H 0.322732 -2.606045 4.292720
H 1.168265 -1.105930 3.914024
H 1.462865 -2.557251 2.936452
H 0.601905 -1.581212 0.667097
H -1.649831 -1.188712 0.047921
H -0.937859 2.466809 0.534957
H -2.458877 3.984817 1.703026
H -4.440386 3.100853 2.913312
H -4.870189 0.650338 2.933952
H -3.341237 -0.883714 1.764575
H -1.892375 -1.760517 -1.940550
H -2.391786 -0.824629 -3.363450
H 2.401064 -3.521935 -2.508992
H 1.709192 -4.350441 -1.090468
H -4.018576 -2.392227 -1.034578
H -6.151004 -1.777279 0.069262
H -6.853546 0.602809 0.174992
H -5.424612 2.355443 -0.852077
H -3.319213 1.732344 -1.987866
H 3.179342 -1.045615 -2.090187
H 4.707007 0.269946 -0.629498
H 5.184743 -0.500471 1.679898
H 4.149888 -2.605249 2.513908
H 2.673847 -3.931729 1.032335

```

```

-----
Statistical Thermodynamic Analysis
Temperature= 298.150 Kelvin   Pressure= 1.00000 Atm
=====
SCF Energy= -2086.89719461   Predicted Change= -
1.388801D-08
Zero-point correction (ZPE)= -2086.2739   0.62324
Internal Energy (U)= -2086.2384   0.65874
Enthalpy (H)= -2086.2375
0.65968
Gibbs Free Energy (G)= -2086.3411
0.55605

```



SCRF=(PCM,SOLVENT=CH2Cl2) opt=(maxcycle=250,gdiis)  
iop(1/8=18)  
freq=noraman temp=298.15  
#N Geom=AllCheck Guess=TCheck SCRF=Check Test GenChk  
RM062X/6-31G(d) Freq

Pointgroup= C1 Stoichiometry= C16H27NO2  
C1[X(C16H27NO2)] #Atoms= 46  
Charge = 0 Multiplicity = 1

SCF Energy= -830.814674709 Predicted Change= -1.147318D-08

Optimization completed. {Found 1 times}  
Item Max Val. Criteria Pass? RMS Val. Criteria  
Pass?  
Force 0.00001 || 0.00045 [ YES ] 0.00000 || 0.00030 [ YES ]  
Displ 0.00700 || 0.00180 [ NO ] 0.00700 || 0.00180 [ NO ]

| Atomic Type | Coordinates (Angstroms) |           |           |
|-------------|-------------------------|-----------|-----------|
|             | X                       | Y         | Z         |
| N           | 2.642650                | 0.008434  | -0.043499 |
| C           | 2.908147                | -0.938196 | -1.161426 |
| C           | 2.839656                | -2.376880 | -0.643626 |
| C           | 1.909702                | -0.770591 | -2.305673 |
| C           | 2.373808                | 1.406140  | -0.478328 |
| C           | 1.918476                | 2.253139  | 0.708400  |
| C           | 3.539509                | 2.058149  | -1.224225 |
| C           | 3.702143                | -0.076119 | 0.994512  |
| C           | 3.172048                | -0.594705 | 2.326394  |
| H           | 1.831328                | -2.598345 | -0.277959 |
| H           | 3.548382                | -2.567369 | 0.166529  |
| H           | 3.072454                | -3.070717 | -1.456418 |
| H           | 3.924087                | -0.756993 | -1.549692 |
| H           | 2.045490                | -1.587711 | -3.019754 |
| H           | 2.043076                | 0.168322  | -2.848459 |
| H           | 0.881662                | -0.805280 | -1.929316 |
| H           | 1.513348                | 1.340274  | -1.147252 |
| H           | 2.723612                | 2.436714  | 1.427329  |
| H           | 1.087032                | 1.769894  | 1.229775  |
| H           | 1.572182                | 3.225423  | 0.345973  |
| H           | 4.420552                | 2.170816  | -0.583059 |
| H           | 3.832760                | 1.479463  | -2.105661 |
| H           | 3.246801                | 3.056836  | -1.562439 |
| H           | 4.512539                | -0.718647 | 0.633772  |
| H           | 4.152553                | 0.909093  | 1.142656  |
| H           | 2.731146                | -1.589774 | 2.214114  |
| H           | 3.980428                | -0.652553 | 3.061487  |
| H           | 2.395397                | 0.070265  | 2.716615  |
| C           | -3.579215               | 0.974356  | 0.586966  |
| C           | -4.759139               | 1.466150  | 0.039487  |
| C           | -5.640478               | 0.603909  | -0.613087 |
| C           | -5.331188               | -0.749209 | -0.713776 |
| C           | -4.146288               | -1.237435 | -0.163742 |
| C           | -3.259731               | -0.383577 | 0.491960  |
| C           | -1.985418               | -0.907282 | 1.097821  |
| C           | -0.717350               | -0.339917 | 0.473944  |
| O           | 0.366622                | -0.875387 | 1.008189  |
| O           | -0.702182               | 0.507882  | -0.398311 |
| H           | -2.890247               | 1.648703  | 1.089103  |
| H           | -4.992954               | 2.523478  | 0.121184  |
| H           | -6.562966               | 0.986825  | -1.038793 |
| H           | -6.011140               | -1.428473 | -1.219313 |
| H           | -3.908894               | -2.295477 | -0.243763 |
| H           | 1.232935                | -0.487401 | 0.573264  |
| H           | -1.929056               | -1.998248 | 1.022908  |

H -1.934678 -0.675708 2.169035

Statistical Thermodynamic Analysis  
Temperature= 298.150 Kelvin Pressure= 1.00000 Atm

SCF Energy= -830.814674709 Predicted Change= -1.147318D-08  
Zero-point correction (ZPE)= -830.4022 0.41244  
Internal Energy (U)= -830.3806 0.43403  
Enthalpy (H)= -830.3796 0.43498  
Gibbs Free Energy (G)= -830.4554 0.35927

Frequencies -- 9.0284 16.1266 38.9416

183.15K thermal correction = 0.385493  
Single point SCF = -831.093076

### D: (Z)-enolate/ketone complex

Using Gaussian 09: AM64L-G09RevD.01 24-Apr-2013

#m062x/6-31G(d) gfpri n gfinpu  
scf=(direct,tight,maxcycle=300,xqc)  
opt=(maxcycle=250,gdiis) iop(1/8=18) freq=noraman  
temp=298.15  
SCRF=(PCM,SOLVENT=dichloromethane)  
#N Geom=AllCheck Guess=TCheck SCRF=Check Test GenChk  
RM062X/6-31G(d) Freq

Pointgroup= C1 Stoichiometry= C35H30BrF3N2O2S  
C1[X(C35H30BrF3N2O2S)] #Atoms= 74  
Charge = 0 Multiplicity = 1

SCF Energy= -4880.47694907 Predicted Change= -5.469429D-09

Optimization completed. {Found 2 times}  
Item Max Val. Criteria Pass? RMS Val. Criteria  
Pass?  
Force 0.00000 || 0.00045 [ YES ] 0.00000 || 0.00030 [ YES ]  
Displ 0.00155 || 0.00180 [ YES ] 0.00155 || 0.00180 [ YES ]

| Atomic Type | Coordinates (Angstroms) |           |           |
|-------------|-------------------------|-----------|-----------|
|             | X                       | Y         | Z         |
| N           | 3.412260                | 1.201882  | 0.014712  |
| C           | 4.126398                | 0.036733  | -0.503874 |
| C           | 3.127002                | -0.971180 | -1.047486 |
| C           | 3.828308                | -2.264300 | -1.509123 |
| C           | 5.049074                | -1.964751 | -2.386110 |
| C           | 2.880039                | -3.184770 | -2.284014 |
| C           | 2.027182                | -1.228869 | 0.005311  |
| C           | 2.486773                | -2.028087 | 1.211955  |
| N           | 1.414396                | 0.044515  | 0.432104  |
| C           | 0.012107                | 0.093041  | 0.923000  |
| C           | -0.673697               | -1.100376 | 0.984402  |
| C           | -2.064191               | -1.211387 | 1.395109  |
| O           | -0.377604               | 1.251952  | 1.195466  |
| C           | 2.120499                | 1.165811  | 0.399195  |
| S           | 1.525404                | 2.743413  | 0.879299  |
| C           | 3.118676                | 3.428631  | 0.559916  |
| C           | 4.014719                | 2.463195  | 0.109100  |

|    |           |           |           |
|----|-----------|-----------|-----------|
| C  | 3.520368  | 4.750624  | 0.718082  |
| C  | 4.838926  | 5.080420  | 0.419430  |
| C  | 5.735857  | 4.103558  | -0.023841 |
| C  | 5.339046  | 2.779879  | -0.184415 |
| C  | 3.137659  | -1.414174 | 2.285200  |
| C  | 3.593155  | -2.170538 | 3.362374  |
| C  | 3.399110  | -3.549525 | 3.381704  |
| C  | 2.741206  | -4.167905 | 2.320811  |
| C  | 2.286257  | -3.410157 | 1.245532  |
| C  | -2.817660 | -0.160058 | 1.956027  |
| C  | -4.152432 | -0.341200 | 2.302283  |
| C  | -4.790534 | -1.563837 | 2.098365  |
| C  | -4.058609 | -2.619659 | 1.554160  |
| C  | -2.723824 | -2.445263 | 1.210507  |
| H  | 4.749812  | -0.394229 | 0.290120  |
| H  | 4.776384  | 0.394712  | -1.303731 |
| H  | 4.178540  | -2.792780 | -0.613225 |
| H  | 5.450219  | -2.898120 | -2.791975 |
| H  | 5.856473  | -1.477185 | -1.832376 |
| H  | 4.773397  | -1.324059 | -3.232497 |
| H  | 3.356992  | -4.155559 | -2.447692 |
| H  | 2.649751  | -2.751768 | -3.262880 |
| H  | 1.928394  | -3.361766 | -1.774825 |
| H  | 2.624419  | -0.511642 | -1.909880 |
| H  | 1.230221  | -1.771793 | -0.504389 |
| H  | -0.183475 | -2.034657 | 0.753845  |
| H  | 2.821201  | 5.503146  | 1.068308  |
| H  | 5.174133  | 6.105454  | 0.535633  |
| H  | 6.762117  | 4.376392  | -0.245441 |
| H  | 6.043985  | 2.026308  | -0.517719 |
| H  | 3.277779  | -0.335579 | 2.297266  |
| H  | 4.093542  | -1.678037 | 4.190107  |
| H  | 3.748689  | -4.137822 | 4.224194  |
| H  | 2.572784  | -5.240119 | 2.333058  |
| H  | 1.763284  | -3.898469 | 0.426627  |
| H  | -2.341445 | 0.799966  | 2.108098  |
| H  | -4.710715 | 0.495174  | 2.716883  |
| H  | -5.836631 | -1.692505 | 2.360730  |
| H  | -4.532017 | -3.584564 | 1.391346  |
| H  | -2.168562 | -3.274302 | 0.775352  |
| C  | -0.883238 | 0.105030  | -1.970695 |
| C  | -2.243382 | 0.404118  | -1.487212 |
| C  | -0.644184 | -1.262211 | -2.657744 |
| F  | -1.446946 | -1.394036 | -3.721656 |
| F  | -0.873636 | -2.305660 | -1.847379 |
| F  | 0.617217  | -1.352570 | -3.080197 |
| O  | 0.048084  | 0.882860  | -1.959527 |
| C  | -3.280061 | -0.537755 | -1.523108 |
| C  | -4.539566 | -0.204936 | -1.047584 |
| C  | -4.749053 | 1.070963  | -0.536583 |
| Br | -6.443602 | 1.490085  | 0.192280  |
| C  | -3.737274 | 2.023902  | -0.493528 |
| C  | -2.477526 | 1.680364  | -0.964116 |
| H  | -3.115457 | -1.539293 | -1.903581 |
| H  | -5.341521 | -0.933926 | -1.043467 |
| H  | -3.927800 | 3.006365  | -0.076425 |
| H  | -1.657807 | 2.388208  | -0.920371 |

```

-----
Statistical Thermodynamic Analysis
Temperature= 298.150 Kelvin   Pressure= 1.00000 Atm
=====
SCF Energy= -4880.47694907   Predicted Change= -
5.469429D-09
Zero-point correction (ZPE)= -4879.8927   0.58424
Internal Energy (U)= -4879.8542   0.62265
Enthalpy (H)= -4879.8533
0.62359
Gibbs Free Energy (G)= -4879.9647
0.51224

```

```

-----
Frequencies -- 13.9754      24.0653      30.7936

```

```

183.15K thermal correction = 0.549746
Single point SCF = -4883.532648

```

**TS-I-(Re,Si): C-C bond formation**

```

-----
Using Gaussian 09: AM64L-G09RevD.01 24-Apr-2013
=====

```

```

#m062x/6-31G(d) scf=(maxcycle=300,direct,tight)
density=current
SCRFF=(PCM,SOLVENT=CH2Cl2)
opt=(maxcycle=250,ts,calcfc,noeigentest,gdiis)
iop(1/8=18) freq=norman temp=298.15
#N Geom=AllCheck Guess=TCheck SCRFF=Check Test GenChk
RM062X/6-31G(d) Freq

```

```

-----
Pointgroup= C1   Stoichiometry= C35H30BrF3N2O2S
C1[X(C35H30BrF3N2O2S)] #Atoms= 74
Charge = 0      Multiplicity = 1

```

```

-----
SCF Energy= -4880.46632468   Predicted Change= -1.238786D-
08

```

```

=====
Optimization completed.   {Found 2 times}
Item Max Val. Criteria Pass? RMS Val. Criteria
Pass?
Force 0.00000 || 0.00045 [ YES ] 0.00000 || 0.00030 [
YES ]
Displ 0.00179 || 0.00180 [ YES ] 0.00179 || 0.00180 [
YES ]

```

```

-----
Atomic Coordinates (Angstroms)
Type X Y Z

```

|   |           |           |           |
|---|-----------|-----------|-----------|
| N | 3.274695  | 1.527402  | -0.108654 |
| C | 4.021058  | 0.523256  | -0.873369 |
| C | 3.046749  | -0.462357 | -1.492459 |
| C | 3.774389  | -1.600044 | -2.234514 |
| C | 4.903298  | -1.063003 | -3.120503 |
| C | 2.795473  | -2.401436 | -3.095872 |
| C | 2.073246  | -0.973752 | -0.414819 |
| C | 2.692373  | -1.857449 | 0.649667  |
| N | 1.371694  | 0.185926  | 0.194285  |
| C | 0.032306  | 0.063117  | 0.730687  |
| C | -0.618300 | -1.216039 | 0.612356  |
| C | -1.697228 | -1.528684 | 1.580710  |
| O | -0.465009 | 1.089366  | 1.179939  |
| C | 2.015002  | 1.356109  | 0.317353  |
| S | 1.363019  | 2.792779  | 1.065655  |
| C | 2.891857  | 3.617586  | 0.803024  |
| C | 3.812822  | 2.791494  | 0.165985  |
| C | 3.228581  | 4.922540  | 1.153962  |
| C | 4.509968  | 5.369443  | 0.855291  |
| C | 5.435301  | 4.529464  | 0.224282  |
| C | 5.102619  | 3.227747  | -0.129471 |
| C | 3.384702  | -1.336465 | 1.745736  |
| C | 3.967127  | -2.187212 | 2.682344  |
| C | 3.859272  | -3.568125 | 2.536514  |
| C | 3.156767  | -4.096026 | 1.455635  |
| C | 2.573031  | -3.244526 | 0.521554  |
| C | -2.661687 | -0.606506 | 2.018154  |
| C | -3.650207 | -0.986574 | 2.923812  |
| C | -3.709805 | -2.289573 | 3.410064  |
| C | -2.764249 | -3.219387 | 2.977497  |
| C | -1.775790 | -2.840418 | 2.078341  |



|    |           |           |           |
|----|-----------|-----------|-----------|
| H  | 4.741397  | 0.028991  | -0.209785 |
| H  | 4.566932  | 1.067055  | -1.645802 |
| H  | 4.220231  | -2.267080 | -1.484631 |
| H  | 5.330702  | -1.878931 | -3.710394 |
| H  | 5.717917  | -0.618140 | -2.540876 |
| H  | 4.524122  | -0.308190 | -3.820092 |
| H  | 3.315807  | -3.230543 | -3.584481 |
| H  | 2.371288  | -1.759674 | -3.876661 |
| H  | 1.961041  | -2.815696 | -2.526426 |
| H  | 2.425560  | 0.081071  | -2.218212 |
| H  | 1.301470  | -1.515263 | -0.953125 |
| H  | 0.064633  | -2.053173 | 0.506264  |
| H  | 2.509947  | 5.568912  | 1.646535  |
| H  | 4.796206  | 6.381828  | 1.118731  |
| H  | 6.432693  | 4.896797  | 0.008351  |
| H  | 5.827363  | 2.577006  | -0.605460 |
| H  | 3.460555  | -0.260969 | 1.890475  |
| H  | 4.498897  | -1.767797 | 3.530600  |
| H  | 4.309984  | -4.230296 | 3.268926  |
| H  | 3.053035  | -5.170708 | 1.343489  |
| H  | 2.004431  | -3.657213 | -0.309295 |
| H  | -2.640113 | 0.409417  | 1.641995  |
| H  | -4.384842 | -0.253205 | 3.245221  |
| H  | -4.484057 | -2.579986 | 4.113925  |
| H  | -2.794989 | -4.241419 | 3.344183  |
| H  | -1.042487 | -3.571731 | 1.744853  |
| C  | -1.202249 | -0.997146 | -1.347092 |
| C  | -2.472025 | -0.204535 | -1.148237 |
| C  | -1.383856 | -2.499323 | -1.642227 |
| F  | -1.931896 | -2.655616 | -2.858646 |
| F  | -2.150358 | -3.186363 | -0.780297 |
| F  | -0.191225 | -3.128215 | -1.665452 |
| O  | -0.270124 | -0.481484 | -2.024806 |
| C  | -3.727771 | -0.748757 | -0.863993 |
| C  | -4.832294 | 0.077263  | -0.671854 |
| C  | -4.668924 | 1.453768  | -0.746925 |
| Br | -6.163289 | 2.587450  | -0.444139 |
| C  | -3.432795 | 2.022317  | -1.035319 |
| C  | -2.344458 | 1.184932  | -1.244653 |
| H  | -3.865910 | -1.820029 | -0.779147 |
| H  | -5.805566 | -0.347729 | -0.451908 |
| H  | -3.327602 | 3.099921  | -1.098325 |
| H  | -1.370034 | 1.596763  | -1.485442 |

Statistical Thermodynamic Analysis  
Temperature= 298.150 Kelvin Pressure= 1.00000 Atm

SCF Energy= -4880.46632468 Predicted Change= -1.238786D-08  
Zero-point correction (ZPE)= -4879.8821 0.58415  
Internal Energy (U)= -4879.8447 0.62160  
Enthalpy (H)= -4879.8437  
0.62254  
Gibbs Free Energy (G)= -4879.9536  
0.51267

Frequencies -- -209.1648 14.3232 16.5788

183.15K thermal correction = 0.549715  
Single point SCF = -4883.521485

**TS-I-(Re,Re): C-C bond formation**

Using Gaussian 09: AM64L-G09RevD.01 24-Apr-2013

# m062x/6-31G(d) scf=(maxcycle=300,direct,tight,xqc)  
density=current

opt=(maxcycle=250,modredundant)  
SCRF=(PCM,SOLVENT=CH2Cl2) iop(1/8=18)  
Temperature=298.15  
Modredundant Input: B 11 58 F  
Modredundant Input:  
# m062x/6-31G(d) scf=(direct,tight,maxcycle=300,xqc)  
opt=(nofreeze,maxcycle=250,ts,calcf, noeigentest) iop(1/8=18)  
freq=noraman  
SCRF=(PCM,SOLVENT=CH2Cl2) Temperature=298.15  
geom=check guess=read  
#N Geom=AllCheck Guess=TCheck SCRF=Check Test GenChk  
RM062X/6-31G(d) Freq

Pointgroup= C1 Stoichiometry= C35H30BrF3N2O2S  
C1[X(C35H30BrF3N2O2S)] #Atoms= 74  
Charge = 0 Multiplicity = 1

SCF Energy= -4880.46368920 Predicted Change= -1.770657D-09

Optimization completed on the basis of negligible forces.

{Found 3 times}  

|       |          |          |         |          |                 |
|-------|----------|----------|---------|----------|-----------------|
| Item  | Max Val. | Criteria | Pass?   | RMS Val. | Criteria        |
| Force | 0.00000  | 0.00045  | [ YES ] | 0.00000  | 0.00030 [ YES ] |
| Displ | 0.00733  | 0.00180  | [ NO ]  | 0.00733  | 0.00180 [ YES ] |

| Atomic Coordinates (Angstroms) |           |           |           |
|--------------------------------|-----------|-----------|-----------|
| Type                           | X         | Y         | Z         |
| N                              | -4.003677 | 0.063142  | -0.287097 |
| C                              | -3.902247 | 1.428396  | -0.814645 |
| C                              | -2.465511 | 1.708083  | -1.216121 |
| C                              | -2.263292 | 3.164357  | -1.673716 |
| C                              | -3.359330 | 3.605680  | -2.649017 |
| C                              | -0.895291 | 3.341143  | -2.339123 |
| C                              | -1.520437 | 1.310168  | -0.070843 |
| C                              | -1.603714 | 2.161988  | 1.179390  |
| N                              | -1.724343 | -0.126423 | 0.247366  |
| C                              | -0.645304 | -0.960121 | 0.747426  |
| C                              | 0.695937  | -0.433433 | 0.667427  |
| H                              | 0.752442  | 0.650473  | 0.667900  |
| C                              | 1.733627  | -1.005692 | 1.561688  |
| O                              | -0.963158 | -2.081797 | 1.123047  |
| C                              | -2.955398 | -0.648299 | 0.155242  |
| S                              | -3.394553 | -2.279511 | 0.597962  |
| C                              | -5.062440 | -1.943822 | 0.159537  |
| C                              | -5.219705 | -0.633433 | -0.282036 |
| C                              | -6.151281 | -2.808574 | 0.229077  |
| C                              | -7.396772 | -2.323189 | -0.150921 |
| C                              | -7.550044 | -1.001334 | -0.585856 |
| C                              | -6.465951 | -0.135329 | -0.656995 |
| C                              | -2.590467 | 1.983557  | 2.153642  |
| C                              | -2.642816 | 2.819308  | 3.266728  |
| C                              | -1.707228 | 3.839484  | 3.422875  |
| C                              | -0.711511 | 4.015654  | 2.465007  |
| C                              | -0.659887 | 3.178215  | 1.354305  |
| C                              | 1.825664  | -2.359129 | 1.922599  |
| C                              | 2.878198  | -2.813125 | 2.714076  |
| C                              | 3.868511  | -1.940142 | 3.158163  |
| C                              | 3.790126  | -0.593286 | 2.807743  |
| C                              | 2.734698  | -0.136871 | 2.027758  |
| H                              | -4.260839 | 2.132551  | -0.053304 |
| H                              | -4.564160 | 1.476801  | -1.680718 |
| H                              | -2.316440 | 3.810224  | -0.786822 |
| H                              | -3.131435 | 4.602133  | -3.038645 |
| H                              | -4.345668 | 3.657142  | -2.177917 |

|    |           |           |           |
|----|-----------|-----------|-----------|
| H  | -3.419018 | 2.918966  | -3.502130 |
| H  | -0.064407 | 3.007859  | -1.711960 |
| H  | -0.734789 | 4.393530  | -2.591844 |
| H  | -0.849519 | 2.754585  | -3.263507 |
| H  | -2.203010 | 1.044817  | -2.052473 |
| H  | -0.525122 | 1.368616  | -0.500401 |
| H  | -6.027586 | -3.830235 | 0.571880  |
| H  | -8.260924 | -2.977048 | -0.107171 |
| H  | -8.532277 | -0.641403 | -0.872090 |
| H  | -6.593376 | 0.890247  | -0.984735 |
| H  | -3.319495 | 1.181187  | 2.063648  |
| H  | -3.413187 | 2.667638  | 4.016066  |
| H  | -1.747417 | 4.486691  | 4.293165  |
| H  | 0.031236  | 4.797729  | 2.585850  |
| H  | 0.125550  | 3.310996  | 0.613377  |
| H  | 1.073362  | -3.055792 | 1.578412  |
| H  | 2.924792  | -3.865452 | 2.980783  |
| H  | 4.689439  | -2.302799 | 3.769377  |
| H  | 4.551933  | 0.104809  | 3.143432  |
| H  | 2.685853  | 0.915494  | 1.755909  |
| C  | 1.133847  | -0.514344 | -1.312907 |
| C  | 2.632346  | -0.332783 | -1.183694 |
| C  | 0.676466  | -1.939097 | -1.678897 |
| F  | 1.166381  | -2.271939 | -2.887688 |
| F  | -0.660617 | -2.001191 | -1.766194 |
| F  | 1.055725  | -2.909743 | -0.829982 |
| O  | 0.471430  | 0.378309  | -1.913300 |
| C  | 3.098982  | 0.981394  | -1.243267 |
| C  | 4.443455  | 1.276561  | -1.048807 |
| C  | 5.327763  | 0.231251  | -0.807745 |
| Br | 7.162260  | 0.614166  | -0.501566 |
| C  | 4.896771  | -1.088730 | -0.775602 |
| C  | 3.545566  | -1.366631 | -0.960929 |
| H  | 2.382105  | 1.773463  | -1.438574 |
| H  | 4.801663  | 2.299868  | -1.081670 |
| H  | 5.604750  | -1.889801 | -0.593403 |
| H  | 3.215863  | -2.397457 | -0.909470 |

#### Statistical Thermodynamic Analysis

Temperature= 298.150 Kelvin Pressure= 1.00000 Atm

SCF Energy= -4880.46368920 Predicted Change= -1.770657D-09  
 Zero-point correction (ZPE)= -4879.8796 0.58407  
 Internal Energy (U)= -4879.8420 0.62164  
 Enthalpy (H)= -4879.8411 0.62258  
 Gibbs Free Energy (G)= -4879.9520 0.51166

Frequencies -- -216.9053 6.7705 15.6703

183.15K thermal correction = 0.549101

Single point SCF = -4883.519764

#### TS-I(Si,Re): C-C bond formation

Using Gaussian 09: AM64L-G09RevD.01 24-Apr-2013

# m062x/6-31G(d) gfpint gfinput  
 scf=(direct,tight,maxcycle=300,xqc)  
 opt=(maxcycle=250,calcf,ts,noeigentest) freq=noraman  
 SCRF=(PCM,SOLVENT=Dichloromethane) iop(1/8=18)  
 Temperature=298.15  
 #N Geom=AllCheck Guess=TChek SCRF=Check Test GenChk  
 RM062X/6-31G(d) Freq

Pointgroup= C1 Stoichiometry= C35H30BrF3N2O2S

C1[X(C35H30BrF3N2O2S)] #Atoms= 74

Charge = 0 Multiplicity = 1

SCF Energy= -4880.45816957 Predicted Change= -1.186941D-08

Optimization completed. {Found 1 times}  
 Item Max Val. Criteria Pass? RMS Val. Criteria  
 Pass?  
 Force 0.00001 || 0.00045 [ YES ] 0.00000 || 0.00030 [ YES ]  
 Displ 0.00226 || 0.00180 [ NO ] 0.00226 || 0.00180 [ YES ]

#### Atomic Coordinates (Angstroms)

| Type | X         | Y         | Z         |
|------|-----------|-----------|-----------|
| C    | 4.802021  | 4.835537  | 0.326224  |
| H    | 5.761631  | 5.296406  | 0.533581  |
| C    | 4.746292  | 3.468874  | 0.080366  |
| H    | 5.643142  | 2.859839  | 0.101350  |
| C    | 3.496636  | 2.913450  | -0.180830 |
| C    | 2.339223  | 3.689567  | -0.186032 |
| C    | 2.399870  | 5.058869  | 0.054802  |
| H    | 1.500923  | 5.665440  | 0.045945  |
| C    | 3.644376  | 5.622246  | 0.313106  |
| H    | 3.716362  | 6.686552  | 0.508717  |
| N    | 3.221985  | 1.568602  | -0.460753 |
| C    | 1.921235  | 1.295522  | -0.628382 |
| S    | 0.924903  | 2.723204  | -0.571358 |
| C    | 4.287465  | 0.576531  | -0.642478 |
| H    | 4.679933  | 0.287401  | 0.339938  |
| H    | 5.077317  | 1.072819  | -1.209043 |
| C    | 3.741990  | -0.621453 | -1.406866 |
| C    | 4.791039  | -1.740061 | -1.547396 |
| H    | 4.957282  | -2.180088 | -0.555910 |
| C    | 6.127545  | -1.188299 | -2.055634 |
| H    | 6.608169  | -0.524129 | -1.331444 |
| H    | 5.989728  | -0.635641 | -2.992886 |
| H    | 6.819393  | -2.012159 | -2.252225 |
| C    | 4.299882  | -2.832802 | -2.501077 |
| H    | 3.370017  | -3.304184 | -2.171556 |
| H    | 5.052889  | -3.620894 | -2.590470 |
| H    | 4.128482  | -2.415642 | -3.500312 |
| H    | 3.473473  | -0.281284 | -2.417471 |
| C    | 2.430687  | -1.083761 | -0.730380 |
| C    | 2.635390  | -1.636950 | 0.667992  |
| H    | 1.982743  | -1.855608 | -1.359815 |
| N    | 1.470685  | 0.045883  | -0.774103 |
| C    | 0.057772  | -0.171020 | -1.035907 |
| C    | -0.513528 | -1.385386 | -0.495255 |
| H    | 0.224645  | -2.081992 | -0.103561 |
| C    | -1.571484 | -2.071375 | -1.279159 |
| O    | -0.545332 | 0.744900  | -1.568035 |
| C    | 2.699333  | -0.813598 | 1.793710  |
| H    | 2.490025  | 0.247722  | 1.711661  |
| C    | 2.971282  | -1.357682 | 3.045598  |
| H    | 3.013627  | -0.707244 | 3.913534  |
| C    | 3.163241  | -2.728986 | 3.190397  |
| H    | 3.366535  | -3.150821 | 4.169887  |
| C    | 3.072189  | -3.560061 | 2.076768  |
| H    | 3.200496  | -4.632895 | 2.181684  |
| C    | 2.808504  | -3.014772 | 0.823844  |
| H    | 2.729870  | -3.670536 | -0.040566 |
| C    | -2.519289 | -1.398168 | -2.066113 |
| H    | -2.500319 | -0.315412 | -2.112038 |
| C    | -3.487001 | -2.106002 | -2.775283 |
| H    | -4.209253 | -1.560429 | -3.376245 |

|    |           |           |           |
|----|-----------|-----------|-----------|
| C  | -3.544735 | -3.495678 | -2.709180 |
| H  | -4.305854 | -4.041723 | -3.258208 |
| C  | -2.614393 | -4.177011 | -1.925031 |
| H  | -2.643470 | -5.261028 | -1.861090 |
| C  | -1.641444 | -3.472818 | -1.225590 |
| H  | -0.919760 | -4.012450 | -0.617006 |
| C  | -2.479777 | 1.429644  | 0.711794  |
| H  | -1.568095 | 1.998785  | 0.855907  |
| C  | -2.412488 | 0.042279  | 0.863144  |
| C  | -1.043161 | -0.527297 | 1.198819  |
| C  | -1.097451 | -1.790182 | 2.085172  |
| F  | 0.125901  | -2.271308 | 2.325913  |
| F  | -1.819320 | -2.820616 | 1.595419  |
| F  | -1.643695 | -1.477816 | 3.276126  |
| C  | -3.584895 | -0.705456 | 0.709674  |
| H  | -3.571129 | -1.783821 | 0.810585  |
| C  | -4.794961 | -0.082134 | 0.415591  |
| H  | -5.702609 | -0.665164 | 0.302345  |
| C  | -4.824728 | 1.297471  | 0.260516  |
| Br | -6.472658 | 2.155739  | -0.137441 |
| C  | -3.675908 | 2.066835  | 0.403337  |
| H  | -3.721317 | 3.144325  | 0.285829  |
| O  | -0.142088 | 0.285446  | 1.571328  |

Statistical Thermodynamic Analysis  
 Temperature= 298.150 Kelvin Pressure= 1.00000 Atm

SCF Energy= -4880.45816957 Predicted Change= -1.186941D-08  
 Zero-point correction (ZPE)= -4879.8742 0.58390  
 Internal Energy (U)= -4879.8368 0.62130  
 Enthalpy (H)= -4879.8359 0.62224  
 Gibbs Free Energy (G)= -4879.9444 0.51370

Frequencies -- -211.6955 20.2448 24.2683

183.15K thermal correction = 0.550230  
 Single point SCF = -4883.515365

### TS-I-(Si,Si): C-C bond formation

Using Gaussian 09: AM64L-G09RevD.01 24-Apr-2013

# m062x/6-31G(d) scf=(maxcycle=300,direct,tight,xqc)  
 density=current  
 opt=(maxcycle=250,modredundant)  
 SCRF=(PCM,SOLVENT=CH2Cl2) iop(1/8=18)  
 Temperature=298.15  
 Modredundant Input: B 11 58 F  
 Modredundant Input:  
 # m062x/6-31G(d) scf=(direct,tight,maxcycle=300,xqc)  
 opt=(nofreeze,maxcycle=250,ts,calcfc,noeigentest) iop(1/8=18)  
 freq=noraman  
 SCRF=(PCM,SOLVENT=CH2Cl2) Temperature=298.15  
 geom=check guess=read  
 #N Geom=AllCheck Guess=TCheck SCRF=Check Test GenChk  
 RM062X/6-31G(d) Freq

Pointgroup= C1 Stoichiometry= C35H30BrF3N2O2S  
 C1[X(C35H30BrF3N2O2S)] #Atoms= 74  
 Charge = 0 Multiplicity = 1

SCF Energy= -4880.45830817 Predicted Change= -4.414332D-08

Optimization completed. {Found 2 times}  
 Item Max Val. Criteria Pass? RMS Val. Criteria  
 Pass?  
 Force 0.00003 || 0.00045 [ YES ] 0.00000 || 0.00030 [ YES ]  
 Displ 0.00329 || 0.00180 [ NO ] 0.00329 || 0.00180 [ YES ]

Atomic Coordinates (Angstroms)  
 Type X Y Z

|   |           |           |           |
|---|-----------|-----------|-----------|
| N | -1.952354 | 1.849899  | -0.748452 |
| C | -1.539225 | 3.178019  | -0.281814 |
| C | -0.044032 | 3.365763  | -0.502573 |
| C | 0.463104  | 4.665899  | 0.148982  |
| C | -0.397663 | 5.863823  | -0.265843 |
| C | 1.923839  | 4.933583  | -0.222332 |
| C | 0.717896  | 2.113555  | -0.018822 |
| C | 0.698719  | 1.919056  | 1.486849  |
| N | 0.205761  | 0.928683  | -0.754565 |
| C | 1.119611  | -0.097027 | -1.268786 |
| C | 2.335612  | -0.310703 | -0.521469 |
| H | 2.416410  | 0.314086  | 0.362652  |
| C | 3.592915  | -0.359034 | -1.304363 |
| O | 0.737590  | -0.721461 | -2.244367 |
| C | -1.092719 | 0.874721  | -1.076885 |
| S | -1.870863 | -0.471080 | -1.857417 |
| C | -3.434143 | 0.269591  | -1.561256 |
| C | -3.297131 | 1.527756  | -0.978834 |
| C | -4.692591 | -0.246602 | -1.856098 |
| C | -5.802917 | 0.531934  | -1.551285 |
| C | -5.658778 | 1.796895  | -0.968169 |
| C | -4.404061 | 2.315298  | -0.671823 |
| C | -0.451135 | 1.513445  | 2.173459  |
| C | -0.435036 | 1.368729  | 3.557777  |
| C | 0.730918  | 1.627624  | 4.275991  |
| C | 1.880942  | 2.028241  | 3.602261  |
| C | 1.862465  | 2.170574  | 2.216854  |
| C | 3.700559  | -1.078794 | -2.501240 |
| C | 4.902218  | -1.096980 | -3.206704 |
| C | 6.018064  | -0.414732 | -2.728603 |
| C | 5.925050  | 0.292102  | -1.529665 |
| C | 4.724825  | 0.318777  | -0.828864 |
| H | -1.813623 | 3.290717  | 0.773754  |
| H | -2.107588 | 3.902549  | -0.869077 |
| H | 0.389577  | 4.548877  | 1.238691  |
| H | 0.032415  | 6.786891  | 0.132579  |
| H | -1.422622 | 5.793950  | 0.110114  |
| H | -0.436173 | 5.955835  | -1.357930 |
| H | 2.604172  | 4.153839  | 0.130860  |
| H | 2.255903  | 5.878546  | 0.216720  |
| H | 2.033502  | 5.010690  | -1.310430 |
| H | 0.128526  | 3.436650  | -1.585950 |
| H | 1.754499  | 2.213548  | -0.345215 |
| H | -4.800489 | -1.230654 | -2.299603 |
| H | -6.795297 | 0.149541  | -1.764072 |
| H | -6.540857 | 2.382988  | -0.734657 |
| H | -4.294150 | 3.289370  | -0.207956 |
| H | -1.358304 | 1.262450  | 1.630434  |
| H | -1.333325 | 1.043750  | 4.073872  |
| H | 0.743308  | 1.509355  | 5.354648  |
| H | 2.797553  | 2.221225  | 4.150139  |
| H | 2.771281  | 2.464740  | 1.696368  |
| H | 2.839574  | -1.625028 | -2.864059 |
| H | 4.966825  | -1.656762 | -4.135728 |
| H | 6.952313  | -0.434641 | -3.281798 |
| H | 6.788051  | 0.826092  | -1.141956 |
| H | 4.657015  | 0.868889  | 0.108054  |

|    |           |           |           |
|----|-----------|-----------|-----------|
| C  | 2.116031  | -2.204971 | 0.120338  |
| C  | 2.943089  | -2.057298 | 1.418120  |
| F  | 4.246987  | -1.941075 | 1.153184  |
| F  | 2.786556  | -3.164475 | 2.170055  |
| F  | 2.615076  | -1.016140 | 2.215939  |
| C  | 0.619323  | -2.346793 | 0.378490  |
| O  | 2.635687  | -2.990261 | -0.709120 |
| C  | -0.060862 | -3.282299 | -0.402917 |
| C  | -1.433874 | -3.462779 | -0.276309 |
| C  | -2.128926 | -2.681135 | 0.638072  |
| Br | -4.022659 | -2.781475 | 0.691352  |
| C  | -1.474935 | -1.766860 | 1.455356  |
| C  | -0.097446 | -1.608739 | 1.323868  |
| H  | 0.513097  | -3.854193 | -1.123609 |
| H  | -1.963880 | -4.174210 | -0.900842 |
| H  | -2.034865 | -1.176758 | 2.174573  |
| H  | 0.408171  | -0.888338 | 1.956616  |

-----  
Statistical Thermodynamic Analysis

Temperature= 298.150 Kelvin    Pressure= 1.00000 Atm  
=====

|                              |                |                   |         |
|------------------------------|----------------|-------------------|---------|
| SCF Energy=                  | -4880.45830817 | Predicted Change= | -       |
| 4.414332D-08                 |                |                   |         |
| Zero-point correction (ZPE)= | -4879.8746     |                   | 0.58367 |
| Internal Energy (U)=         | -4879.8371     |                   | 0.62118 |
| Enthalpy (H)=                |                | -4879.8361        |         |
| 0.62212                      |                |                   |         |
| Gibbs Free Energy (G)=       |                | -4879.9455        |         |
| 0.51274                      |                |                   |         |

-----  
Frequencies -- -173.0946            11.1301            20.3685

183.15K thermal correction = 0.549589

Single point SCF = -4883.514706

**J: Tetrahedral Intermediate**

-----  
Using Gaussian 09: AM64L-G09RevD.01 24-Apr-2013  
=====

```
#m062x/6-31G(d) gfpint gfinput
scf=(direct,tight,maxcycle=300,xqc)
opt=(maxcycle=250,gsdiis) iop(1/8=18) freq=noraman
temp=298.15
SCRF=(PCM,SOLVENT=dichloromethane)
#N Geom=AllCheck Guess=TCheck SCRF=Check Test GenChk
RM062X/6-31G(d) Freq
```

-----  
Pointgroup= C1    Stoichiometry= C35H30BrF3N2O2S

C1[X(C35H30BrF3N2O2S)] #Atoms= 74

Charge = 0            Multiplicity = 1

-----  
SCF Energy= -4880.47223239    Predicted Change= -2.849755D-09  
=====

```
Optimization completed.    {Found 2 times}
Item    Max Val.    Criteria    Pass?    RMS Val.    Criteria
Pass?
Force    0.00000 || 0.00045 [ YES ]    0.00000 || 0.00030 [
YES ]
Displ    0.00072 || 0.00180 [ YES ]    0.00072 || 0.00180 [
YES ]
```

-----  
Atomic Coordinates (Angstroms)

| Type | X        | Y        | Z         |
|------|----------|----------|-----------|
| N    | 3.499709 | 1.412834 | -0.218480 |

|    |           |           |           |
|----|-----------|-----------|-----------|
| C  | 4.100990  | 0.381315  | -1.075967 |
| C  | 2.990492  | -0.426115 | -1.726331 |
| C  | 3.521027  | -1.576440 | -2.599775 |
| C  | 4.649097  | -1.106832 | -3.522893 |
| C  | 2.388106  | -2.174469 | -3.439520 |
| C  | 2.012495  | -0.909821 | -0.642859 |
| C  | 2.585241  | -1.906638 | 0.345400  |
| N  | 1.462651  | 0.281735  | 0.056846  |
| C  | 0.111435  | 0.300129  | 0.523629  |
| C  | -0.654222 | -0.999088 | 0.511552  |
| C  | -1.450412 | -1.217312 | 1.777683  |
| O  | -0.333547 | 1.347195  | 0.939175  |
| C  | 2.235168  | 1.371104  | 0.218311  |
| S  | 1.760697  | 2.827134  | 1.046450  |
| C  | 3.381512  | 3.467288  | 0.837566  |
| C  | 4.190430  | 2.579859  | 0.132926  |
| C  | 3.875459  | 4.695023  | 1.270410  |
| C  | 5.200859  | 5.000072  | 0.986477  |
| C  | 6.012799  | 4.099413  | 0.285775  |
| C  | 5.522067  | 2.876142  | -0.151784 |
| C  | 3.287446  | -1.514568 | 1.488632  |
| C  | 3.809763  | -2.467877 | 2.360174  |
| C  | 3.631892  | -3.824687 | 2.102489  |
| C  | 2.923176  | -4.225197 | 0.971747  |
| C  | 2.399631  | -3.271841 | 0.102751  |
| C  | -2.340657 | -0.275087 | 2.308065  |
| C  | -3.048989 | -0.552706 | 3.475166  |
| C  | -2.886095 | -1.771458 | 4.129932  |
| C  | -2.003818 | -2.716318 | 3.610509  |
| C  | -1.293721 | -2.436112 | 2.447149  |
| H  | 0.058071  | -1.822846 | 0.447756  |
| H  | 4.764634  | -0.245925 | -0.468501 |
| H  | 4.695191  | 0.910068  | -1.823351 |
| H  | 3.925010  | -2.352578 | -1.936190 |
| H  | 4.928933  | -1.912753 | -4.207356 |
| H  | 5.549358  | -0.819365 | -2.971214 |
| H  | 4.326507  | -0.250921 | -4.128050 |
| H  | 2.757686  | -3.028087 | -4.015509 |
| H  | 2.010643  | -1.426541 | -4.146518 |
| H  | 1.535849  | -2.511120 | -2.843112 |
| H  | 2.413297  | 0.250200  | -2.373255 |
| H  | 1.147955  | -1.310640 | -1.176999 |
| H  | 3.243869  | 5.388115  | 1.815419  |
| H  | 5.611127  | 5.948206  | 1.316395  |
| H  | 7.046202  | 4.356698  | 0.080750  |
| H  | 6.156257  | 2.177055  | -0.685269 |
| H  | 3.421577  | -0.460479 | 1.721173  |
| H  | 4.350936  | -2.147373 | 3.244822  |
| H  | 4.035200  | -4.565747 | 2.785214  |
| H  | 2.766737  | -5.280194 | 0.770069  |
| H  | 1.824982  | -3.585797 | -0.764613 |
| H  | -2.477530 | 0.676428  | 1.807333  |
| H  | -3.735593 | 0.189206  | 3.872160  |
| H  | -3.442081 | -1.983614 | 5.038170  |
| H  | -1.864770 | -3.669941 | 4.110818  |
| H  | -0.603034 | -3.174949 | 2.045811  |
| C  | -1.391898 | -0.974472 | -0.940713 |
| C  | -2.727910 | -0.210536 | -0.839710 |
| C  | -1.658995 | -2.456540 | -1.281520 |
| F  | -2.384245 | -2.585032 | -2.400083 |
| F  | -2.296158 | -3.164111 | -0.319483 |
| F  | -0.494732 | -3.112610 | -1.493599 |
| O  | -0.558292 | -0.469415 | -1.846775 |
| C  | -2.718645 | 1.099943  | -1.317567 |
| C  | -3.854849 | 1.901205  | -1.259252 |
| C  | -5.022896 | 1.365552  | -0.730613 |
| Br | -6.593871 | 2.434323  | -0.672506 |
| C  | -5.070285 | 0.059975  | -0.258402 |
| C  | -3.917212 | -0.720244 | -0.308485 |
| H  | -1.793737 | 1.467568  | -1.748139 |

```

H   -3.839426   2.920895  -1.629412
H   -5.993319  -0.342335   0.145025
H   -3.962690  -1.733096   0.076085
-----
Statistical Thermodynamic Analysis
Temperature= 298.150 Kelvin   Pressure= 1.00000 Atm
=====
SCF Energy=  -4880.47223239      Predicted Change= -
2.849755D-09
Zero-point correction (ZPE)=    -4879.8858      0.58633
Internal Energy (U)=            -4879.8483      0.62389
Enthalpy (H)=                   -4879.8473
0.62484
Gibbs Free Energy (G)=          -4879.9577
0.51449
-----
Frequencies --   12.2055       21.6276       24.5581

183.15K thermal correction = 0.551707
Single point SCF = -4883.528179

```

### TS-K: C-O bond formation

```

-----
Using Gaussian 09: AM64L-G09RevD.01 24-Apr-2013
=====
#m062x/6-31G(d) scf=(maxcycle=300,direct,tight)
density=current
SCRF=(PCM,SOLVENT=CH2Cl2)
opt=(maxcycle=250,ts,calcfc, noeigentest, gdiis)
iop(1/8=18) freq=noraman temp=298.15
#N Geom=AllCheck Guess=TCheck SCRF=Check Test GenChk
RM062X/6-31G(d) Freq
-----
Pointgroup= C1   Stoichiometry= C35H30BrF3N2O2S
C1[X(C35H30BrF3N2O2S)] #Atoms= 74
Charge = 0      Multiplicity = 1
-----
SCF Energy= -4880.46924768   Predicted Change= -2.310261D-
10
=====
Optimization completed.      {Found 2 times}
Item Max Val. Criteria Pass? RMS Val. Criteria
Pass?
Force 0.00000 || 0.00045 [ YES ] 0.00000 || 0.00030 [
YES ]
Disp 0.00055 || 0.00180 [ YES ] 0.00055 || 0.00180 [
YES ]
-----
Atomic Coordinates (Angstroms)
Type X Y Z
-----
N 3.622798 1.335747 -0.272215
C 4.277836 0.191541 -0.916730
C 3.230425 -0.643687 -1.637252
C 3.829416 -1.905972 -2.283751
C 5.093342 -1.581420 -3.086518
C 2.806778 -2.582360 -3.201495
C 2.076096 -0.958242 -0.667238
C 2.445860 -1.887676 0.476183
N 1.519054 0.314316 -0.152619
C 0.098538 0.420081 0.137985
C -0.666236 -0.876433 0.420462
C -1.341729 -0.948646 1.765853
O -0.328368 1.520592 0.425672
C 2.308842 1.379841 -0.004654
S 1.797797 2.937474 0.595227

```

```

C 3.462933 3.497371 0.536056
C 4.315120 2.512697 0.042531
C 3.952581 4.747644 0.901129
C 5.316741 4.979616 0.767428
C 6.169957 3.983021 0.280009
C 5.683773 2.734475 -0.089280
C 2.991390 -1.412780 1.671413
C 3.315690 -2.293765 2.701035
C 3.093335 -3.659766 2.550180
C 2.540032 -4.141788 1.365393
C 2.214782 -3.260622 0.338017
C -2.167201 0.064706 2.268701
C -2.782467 -0.080688 3.509655
C -2.590257 -1.237223 4.263435
C -1.772016 -2.251115 3.771834
C -1.152211 -2.101927 2.533982
H 0.026373 -1.716966 0.374027
H 4.816428 -0.389193 -0.157572
H 4.999069 0.605232 -1.623442
H 4.105668 -2.602969 -1.481615
H 5.430728 -2.472828 -3.623132
H 5.920302 -1.250731 -2.451267
H 4.893731 -0.799773 -3.829512
H 3.225422 -3.504233 -3.615604
H 2.555633 -1.920334 -4.038369
H 1.872518 -2.838949 -2.694963
H 2.800869 -0.023913 -2.437650
H 1.257510 -1.372219 -1.258533
H 3.287050 5.515362 1.281033
H 5.723440 5.944987 1.048469
H 7.232118 4.183080 0.190122
H 6.350823 1.961989 -0.454995
H 3.149226 -0.347168 1.820392
H 3.733158 -1.907559 3.625474
H 3.340233 -4.344360 3.355409
H 2.350054 -5.203479 1.243149
H 1.755653 -3.637623 -0.572233
H -2.323503 0.965811 1.685569
H -3.419955 0.713342 3.887224
H -3.074435 -1.346510 5.229265
H -1.611504 -3.155513 4.351058
H -0.506569 -2.891600 2.153690
C -1.447229 -0.882503 -0.942248
C -2.826036 -0.215436 -0.849073
C -1.616207 -2.340368 -1.392449
F -2.336521 -2.448992 -2.515553
F -2.206799 -3.123507 -0.462135
F -0.419067 -2.918204 -1.643174
O -0.578838 -0.239844 -1.770186
C -2.968563 1.032688 -1.453129
C -4.170936 1.731111 -1.387453
C -5.241181 1.159429 -0.711372
Br -6.888605 2.103913 -0.615547
C -5.132284 -0.085537 -0.103070
C -3.920191 -0.766346 -0.172949
H -2.106999 1.439247 -1.970697
H -4.278136 2.704149 -1.854910
H -5.978641 -0.514209 0.422700
H -3.836047 -1.729247 0.319393

```

```

-----
Statistical Thermodynamic Analysis
Temperature= 298.150 Kelvin   Pressure= 1.00000 Atm
=====
SCF Energy=  -4880.46924768      Predicted Change= -
2.310261D-10
Zero-point correction (ZPE)=    -4879.8836      0.58561
Internal Energy (U)=            -4879.8466      0.62261
Enthalpy (H)=                   -4879.8456
0.62355

```

Gibbs Free Energy (G)= -4879.9543  
 0.51487  
 -----  
 Frequencies -- -202.1004 17.8628 21.3091  
 183.15K thermal correction = 0.551510  
 Single point SCF = -4883.523861

**F: Product-catalyst complex**

Using Gaussian 09: AM64L-G09RevD.01 24-Apr-2013  
 =====  
 #m062X/6-31G(d) scf=(direct,tight,maxcycle=300,xqc)  
 SCRF=(PCM,SOLVENT=CH2Cl2) opt=(maxcycle=250,gdiis)  
 iop(1/8=18)  
 freq=norman temp=298.15  
 #N Geom=AllCheck Guess=TChek SCRF=Check Test GenChk  
 RM062X/6-31G(d) Freq

Pointgroup= C1 Stoichiometry= C35H30BrF3N2O2S  
 C1[X(C35H30BrF3N2O2S)] #Atoms= 74  
 Charge = 0 Multiplicity = 1  
 -----  
 SCF Energy= -4880.48043572 Predicted Change= -1.925280D-08  
 =====

Optimization completed. {Found 1 times}  
 Item Max Val. Criteria Pass? RMS Val. Criteria  
 Pass?  
 Force 0.00003 || 0.00045 [ YES ] 0.00000 || 0.00030 [ YES ]  
 Displ 0.00206 || 0.00180 [ NO ] 0.00206 || 0.00180 [ YES ]

| Atomic Type | Coordinates (Angstroms) |           |           |
|-------------|-------------------------|-----------|-----------|
|             | X                       | Y         | Z         |
| N           | 3.650144                | 1.201120  | -0.509009 |
| C           | 4.329848                | -0.012090 | -0.970192 |
| C           | 3.319608                | -0.948140 | -1.617569 |
| C           | 3.944669                | -2.295029 | -2.020162 |
| C           | 5.251047                | -2.096723 | -2.795946 |
| C           | 2.970979                | -3.114949 | -2.872122 |
| C           | 2.104882                | -1.090038 | -0.676510 |
| C           | 2.410917                | -1.805433 | 0.633285  |
| N           | 1.521544                | 0.238620  | -0.439463 |
| C           | 0.000585                | 0.402398  | -0.264481 |
| C           | -0.659034               | -0.749794 | 0.584377  |
| C           | -1.201880               | -0.442029 | 1.941926  |
| O           | -0.314344               | 1.605517  | -0.061444 |
| C           | 2.313123                | 1.287327  | -0.344183 |
| S           | 1.791354                | 2.916892  | 0.048560  |
| C           | 3.477082                | 3.442164  | 0.035364  |
| C           | 4.342359                | 2.397101  | -0.278468 |
| C           | 3.972023                | 4.715807  | 0.293026  |
| C           | 5.348935                | 4.913930  | 0.237084  |
| C           | 6.211117                | 3.857557  | -0.070289 |
| C           | 5.720766                | 2.581848  | -0.332755 |
| C           | 2.837695                | -1.120157 | 1.773587  |
| C           | 3.094434                | -1.806811 | 2.958746  |
| C           | 2.921294                | -3.186728 | 3.022532  |
| C           | 2.486305                | -3.877989 | 1.893242  |
| C           | 2.230530                | -3.190919 | 0.709903  |
| C           | -2.020196               | 0.666588  | 2.194522  |
| C           | -2.484328               | 0.915524  | 3.483329  |
| C           | -2.138846               | 0.068340  | 4.535387  |
| C           | -1.317872               | -1.031072 | 4.295695  |

|    |           |           |           |
|----|-----------|-----------|-----------|
| C  | -0.854044 | -1.280497 | 3.006956  |
| H  | 0.006204  | -1.611582 | 0.659446  |
| H  | 4.836997  | -0.488550 | -0.121271 |
| H  | 5.082296  | 0.304693  | -1.695347 |
| H  | 4.174024  | -2.852636 | -1.102752 |
| H  | 5.615343  | -3.058959 | -3.167169 |
| H  | 6.042666  | -1.663143 | -2.177774 |
| H  | 5.092122  | -1.442104 | -3.661609 |
| H  | 3.401615  | -4.094324 | -3.100193 |
| H  | 2.778408  | -2.602330 | -3.821917 |
| H  | 2.005257  | -3.281857 | -2.386682 |
| H  | 2.947923  | -0.460330 | -2.530412 |
| H  | 1.329606  | -1.638717 | -1.209300 |
| H  | 3.299669  | 5.532714  | 0.534698  |
| H  | 5.755814  | 5.899541  | 0.436564  |
| H  | 7.281649  | 4.029338  | -0.103488 |
| H  | 6.393176  | 1.761978  | -0.560363 |
| H  | 2.953623  | -0.039721 | 1.758454  |
| H  | 3.419736  | -1.256402 | 3.835957  |
| H  | 3.115506  | -3.719225 | 3.948151  |
| H  | 2.335781  | -4.952235 | 1.934271  |
| H  | 1.867566  | -3.734426 | -0.158883 |
| H  | -2.273602 | 1.332999  | 1.378028  |
| H  | -3.119282 | 1.777075  | 3.668295  |
| H  | -2.505899 | 0.266552  | 5.538109  |
| H  | -1.038179 | -1.692762 | 5.110012  |
| H  | -0.205164 | -2.134651 | 2.818451  |
| C  | -1.525517 | -0.951198 | -0.688041 |
| C  | -2.910409 | -0.332619 | -0.697600 |
| C  | -1.597731 | -2.403062 | -1.153785 |
| F  | -2.183589 | -2.509859 | -2.350910 |
| F  | -2.283832 | -3.167206 | -0.289127 |
| F  | -0.375701 | -2.961474 | -1.265296 |
| O  | -0.595090 | -0.249601 | -1.499101 |
| C  | -3.152335 | 0.778990  | -1.502574 |
| C  | -4.412427 | 1.369268  | -1.536372 |
| C  | -5.427564 | 0.834900  | -0.753208 |
| Br | -7.157292 | 1.615185  | -0.819372 |
| C  | -5.206417 | -0.261807 | 0.071662  |
| C  | -3.942192 | -0.840966 | 0.097323  |
| H  | -2.336771 | 1.186119  | -2.088148 |
| H  | -4.604323 | 2.232389  | -2.164373 |
| H  | -6.008020 | -0.656173 | 0.686274  |
| H  | -3.762869 | -1.685830 | 0.753560  |

Statistical Thermodynamic Analysis  
 Temperature= 298.150 Kelvin Pressure= 1.00000 Atm  
 =====

SCF Energy= -4880.48043572 Predicted Change= -1.925280D-08  
 Zero-point correction (ZPE)= -4879.8943 0.58610  
 Internal Energy (U)= -4879.8570 0.62339  
 Enthalpy (H)= -4879.8560 0.62434  
 Gibbs Free Energy (G)= -4879.9658 0.51462

Frequencies -- 15.8490 22.3150 24.0400  
 183.15K thermal correction = 0.551625  
 Single point SCF = -4883.531745

**TS-G: Catalyst release**

Using Gaussian 09: AM64L-G09RevD.01 24-Apr-2013  
 =====

```
# m062x/6-31G(d) scf=(maxcycle=300,direct,tight,xqc)
density=current
opt=(maxcycle=250,modredundant)
SCRF=(PCM,SOLVENT=CH2Cl2) iop(1/8=18)
Temperature=298.15
Modredundant Input: B 9 43 F
Modredundant Input:
# m062x/6-31G(d) scf=(direct,tight,maxcycle=300,xqc)
opt=(nofreeze,maxcycle=250,ts,calcfc,noeigentest) iop(1/8=18)
freq=norman
SCRF=(PCM,SOLVENT=CH2Cl2) Temperature=298.15
geom=check guess=read
#N Geom=AllCheck Guess=TCheck SCRF=Check Test GenChk
RM062X/6-31G(d) Freq
```

```
-----
Pointgroup= C1 Stoichiometry= C35H30BrF3N2O2S
C1[X(C35H30BrF3N2O2S)] #Atoms= 74
Charge = 0 Multiplicity = 1
-----
SCF Energy= -4880.47109192 Predicted Change= -7.038111D-09
```

```
=====
Optimization completed. {Found 2 times}
Item Max Val. Criteria Pass? RMS Val. Criteria
Pass?
Force 0.00000 || 0.00045 [ YES ] 0.00000 || 0.00030 [
YES ]
Displ 0.00186 || 0.00180 [ NO ] 0.00186 || 0.00180 [
YES ]
```

| Atomic Coordinates (Angstroms) |           |           |           |
|--------------------------------|-----------|-----------|-----------|
| Type                           | X         | Y         | Z         |
| N                              | -3.915909 | 0.613732  | 0.404479  |
| C                              | -4.495497 | -0.638195 | 0.887129  |
| C                              | -3.425536 | -1.479605 | 1.583932  |
| C                              | -3.961490 | -2.878282 | 1.938715  |
| C                              | -5.283429 | -2.793395 | 2.708608  |
| C                              | -2.939570 | -3.667913 | 2.759820  |
| C                              | -2.119543 | -1.521975 | 0.757327  |
| C                              | -2.162276 | -2.408980 | -0.473252 |
| N                              | -1.691157 | -0.167961 | 0.389405  |
| C                              | -2.569519 | 0.769373  | 0.275376  |
| S                              | -2.146597 | 2.449916  | -0.076934 |
| C                              | -3.855352 | 2.883427  | -0.094068 |
| C                              | -4.660362 | 1.774133  | 0.182150  |
| C                              | -4.413371 | 4.130841  | -0.335048 |
| C                              | -5.801711 | 4.251252  | -0.298084 |
| C                              | -6.604941 | 3.142505  | -0.027507 |
| C                              | -6.046103 | 1.889456  | 0.214458  |
| C                              | -1.368281 | -3.554627 | -0.524155 |
| C                              | -1.374453 | -4.376653 | -1.648711 |
| C                              | -2.176513 | -4.057615 | -2.740669 |
| C                              | -2.958633 | -2.904134 | -2.707854 |
| C                              | -2.947089 | -2.083008 | -1.584375 |
| H                              | -4.959030 | -1.182620 | 0.054902  |
| H                              | -5.280940 | -0.371982 | 1.598788  |
| H                              | -4.144609 | -3.415804 | 0.997748  |
| H                              | -5.599679 | -3.792551 | 3.022229  |
| H                              | -6.092393 | -2.369078 | 2.106640  |
| H                              | -5.168754 | -2.179610 | 3.610462  |
| H                              | -2.667939 | -3.115635 | 3.667296  |
| H                              | -2.023675 | -3.873681 | 2.200260  |
| H                              | -3.361673 | -4.630104 | 3.064760  |
| H                              | -3.169193 | -0.962823 | 2.520490  |
| H                              | -1.328998 | -1.896727 | 1.413969  |
| H                              | -3.783778 | 4.988604  | -0.546496 |
| H                              | -6.257967 | 5.217743  | -0.482410 |
| H                              | -7.683938 | 3.252231  | -0.005818 |

|    |           |           |           |
|----|-----------|-----------|-----------|
| H  | -6.673588 | 1.028063  | 0.416485  |
| H  | -0.710845 | -3.784583 | 0.310382  |
| H  | -0.743560 | -5.259883 | -1.673946 |
| H  | -2.181396 | -4.694111 | -3.620058 |
| H  | -3.569656 | -2.635951 | -3.564353 |
| H  | -3.523927 | -1.161429 | -1.597545 |
| C  | -0.003828 | 0.242821  | 0.826320  |
| C  | 0.628220  | 0.895519  | -0.448331 |
| C  | 1.347737  | 2.200184  | -0.303696 |
| O  | -0.008075 | 0.671490  | 1.971196  |
| C  | 1.270901  | 3.138235  | -1.337356 |
| C  | 1.950103  | 4.351370  | -1.253169 |
| C  | 2.712833  | 4.641620  | -0.124872 |
| C  | 2.789239  | 3.716222  | 0.915253  |
| C  | 2.112430  | 2.503425  | 0.829504  |
| H  | -0.084937 | 0.943872  | -1.274489 |
| H  | 0.674235  | 2.910397  | -2.217872 |
| H  | 1.881061  | 5.067567  | -2.066243 |
| H  | 3.243825  | 5.586097  | -0.053884 |
| H  | 3.379573  | 3.940793  | 1.798435  |
| H  | 2.168304  | 1.785925  | 1.641373  |
| C  | 1.410731  | -0.450111 | -0.517981 |
| C  | 2.884749  | -0.421899 | -0.177807 |
| C  | 1.167802  | -1.223471 | -1.809958 |
| F  | 1.851778  | -0.689474 | -2.836798 |
| F  | -0.122378 | -1.222104 | -2.158289 |
| F  | 1.553383  | -2.498341 | -1.680475 |
| O  | 0.626031  | -1.037723 | 0.517682  |
| C  | 3.791308  | 0.292893  | -0.966628 |
| C  | 5.142298  | 0.318103  | -0.642297 |
| C  | 5.579548  | -0.376862 | 0.480649  |
| Br | 7.423612  | -0.350336 | 0.926630  |
| C  | 4.695910  | -1.085512 | 1.283366  |
| C  | 3.344144  | -1.102769 | 0.947384  |
| H  | 3.444101  | 0.849084  | -1.831442 |
| H  | 5.846515  | 0.875307  | -1.249812 |
| H  | 5.054809  | -1.615658 | 2.158635  |
| H  | 2.635200  | -1.639854 | 1.567242  |

```
-----
Statistical Thermodynamic Analysis
Temperature= 298.150 Kelvin Pressure= 1.00000 Atm
-----
SCF Energy= -4880.47109192 Predicted Change= -7.038111D-09
Zero-point correction (ZPE)= -4879.8869 0.58415
Internal Energy (U)= -4879.8495 0.62154
Enthalpy (H)= -4879.8486 0.62248
Gibbs Free Energy (G)= -4879.9592 0.51186
-----
Frequencies -- -132.3537 13.2376 24.6362
```

```
183.15K thermal correction = 0.549236
Single point SCF = -4883.523794
```

### H: Major Product

```
-----
Using Gaussian 09: AM64L-G09RevD.01 24-Apr-2013
-----
```

```
=====
#m062X/6-31G(d) scf=(direct,tight,maxcycle=300,xqc)
SCRF=(PCM,SOLVENT=CH2Cl2) opt=(maxcycle=250,gdiis)
iop(1/8=18)
freq=norman temp=298.15
#N Geom=AllCheck Guess=TCheck SCRF=Check Test GenChk
RM062X/6-31G(d) Freq
-----
```

Pointgroup= C1 Stoichiometry= C16H10BrF3O2  
 C1[X(C16H10BrF3O2)] #Atoms= 32  
 Charge = 0 Multiplicity = 1

SCF Energy= -3637.08787315 Predicted Change= -7.301590D-09

=====  
 Optimization completed. {Found 2 times}  
 Item Max Val. Criteria Pass? RMS Val. Criteria  
 Pass?  
 Force 0.00001 || 0.00045 [ YES ] 0.00000 || 0.00030 [ YES ]  
 Displ 0.00136 || 0.00180 [ YES ] 0.00136 || 0.00180 [ YES ]

=====  
 Atomic Coordinates (Angstroms)  
 Type X Y Z  
 -----  
 C -2.830749 -0.193651 1.517463  
 C -2.484256 0.291395 0.114455  
 C -1.871391 1.651225 -0.045266  
 O -3.476965 0.175324 2.443996  
 C -2.053378 2.347776 -1.240855  
 C -1.442953 3.584374 -1.434630  
 C -0.650513 4.133979 -0.429916  
 C -0.470807 3.445680 0.768754  
 C -1.077902 2.208563 0.960811  
 C -1.572022 -0.978703 0.131102  
 C -0.080469 -0.790202 0.107736  
 C -2.034096 -2.051500 -0.847119  
 F -1.401610 -3.206661 -0.637650  
 F -1.797691 -1.662486 -2.106355  
 F -3.348264 -2.273690 -0.728275  
 O -2.069287 -1.331935 1.445750  
 C 0.692278 -1.199040 1.192386  
 C 2.072536 -1.016893 1.178654  
 C 2.663558 -0.424995 0.069942  
 Br 4.538615 -0.162599 0.049507  
 C 1.907908 -0.012727 -1.023555  
 C 0.531342 -0.198041 -1.000462  
 H -3.340198 0.161454 -0.554487  
 H -2.671693 1.916786 -2.024227  
 H -1.589826 4.117310 -2.368602  
 H -0.176231 5.098988 -0.578072  
 H 0.142992 3.871990 1.555745  
 H -0.930542 1.676627 1.898026  
 H 0.216316 -1.654398 2.053891  
 H 2.678467 -1.329441 2.021423  
 H 2.388191 0.452405 -1.876741  
 H -0.065407 0.134233 -1.844157

Statistical Thermodynamic Analysis  
 Temperature= 298.150 Kelvin Pressure= 1.00000 Atm

=====  
 SCF Energy= -3637.08787315 Predicted Change= -7.301590D-09  
 Zero-point correction (ZPE)= -3636.8591 0.22870  
 Internal Energy (U)= -3636.8410 0.24680  
 Enthalpy (H)= -3636.8401 0.24774  
 Gibbs Free Energy (G)= -3636.9084 0.17944  
 -----  
 Frequencies -- 24.8201 36.1145 42.2829

183.15K thermal correction = 0.203257  
 Single point SCF = -3639.845287

## Concerted [2+2] Mechanism Additional Structures: PBE

TS-A: HBTM addition to phenylacetic anhydride (Si-face)

Using Gaussian 09: AM64L-G09RevD.01 24-Apr-2013

=====  
 # pbepbe/6-31G(d)/auto scf=(maxcycle=300,direct,tight,xqc)  
 density=current  
 opt=(maxcycle=250,modredundant)  
 SCRF=(PCM,SOLVENT=Dichloromethane)  
 iop(1/8=18) Temperature=298.15  
 Modredundant Input: B 17 23 F  
 Modredundant Input:  
 # pbepbe/6-31G(d)/auto scf=(direct,tight,maxcycle=300,xqc)  
 opt=(nofreeze,maxcycle=250,ts,calcfc,noeigentest) iop(1/8=18)  
 freq=noraman  
 SCRF=(PCM,SOLVENT=Dichloromethane)  
 Temperature=298.15 geom=check  
 guess=read  
 #N Geom=AllCheck Guess=TChek SCRF=Check Test GenChk  
 RPBE/6-31G(d)/Auto  
 Freq

=====  
 Pointgroup= C1 Stoichiometry= C35H34N2O3S  
 C1[X(C35H34N2O3S)] #Atoms= 75  
 Charge = 0 Multiplicity = 1

SCF Energy= -2085.34021963 Predicted Change= -5.563560D-10

=====  
 Optimization completed on the basis of negligible forces.  
 {Found 3 times}  
 Item Max Val. Criteria Pass? RMS Val. Criteria  
 Pass?  
 Force 0.00000 || 0.00045 [ YES ] 0.00000 || 0.00030 [ YES ]  
 Displ 0.00193 || 0.00180 [ NO ] 0.00193 || 0.00180 [ YES ]

=====  
 Atomic Coordinates (Angstroms)  
 Type X Y Z  
 -----  
 C -5.902319 -2.852028 -0.280716  
 C -4.977204 -2.039677 0.392835  
 C -3.799584 -1.681421 -0.278942  
 C -3.548791 -2.136029 -1.590444  
 C -4.472515 -2.947663 -2.256395  
 C -5.657279 -3.300345 -1.589819  
 N -2.764679 -0.870179 0.205960  
 C -1.714401 -0.685245 -0.662684  
 S -1.966525 -1.590506 -2.181568  
 C -2.802390 -0.190368 1.508711  
 C -1.889256 1.042864 1.497084  
 C -1.837377 1.744381 2.882430  
 C -1.139080 3.114139 2.792419  
 C -3.241527 1.934990 3.491422  
 C -0.490227 0.644787 0.920425  
 C 0.326913 -0.264748 1.842395  
 N -0.663574 0.054841 -0.420425  
 C 1.262633 0.310256 2.727024  
 C 1.990429 -0.480606 3.627706  
 C 1.801762 -1.870678 3.655159  
 C 0.888843 -2.458561 2.767374  
 C 0.160849 -1.663674 1.867902  
 C 0.583435 0.182479 -1.802403  
 C 0.117255 1.432726 -2.584228



|   |           |           |           |
|---|-----------|-----------|-----------|
| C | -0.074342 | 2.749920  | -1.867509 |
| O | 1.715088  | 0.507783  | -0.842213 |
| C | 2.940902  | 0.714766  | -1.376239 |
| C | 4.015717  | 0.720414  | -0.284242 |
| C | 4.679965  | -0.645158 | -0.193205 |
| O | 3.188408  | 0.858698  | -2.569505 |
| O | 0.647040  | -0.914212 | -2.371205 |
| C | 1.021217  | 3.587524  | -1.570006 |
| C | 0.832374  | 4.823948  | -0.936243 |
| C | -0.460410 | 5.255790  | -0.599142 |
| C | -1.561656 | 4.441611  | -0.904380 |
| C | -1.366909 | 3.201157  | -1.531184 |
| C | 5.931255  | -0.877347 | -0.794006 |
| C | 6.535625  | -2.141540 | -0.721685 |
| C | 5.891865  | -3.192438 | -0.051404 |
| C | 4.639745  | -2.971064 | 0.543742  |
| C | 4.036635  | -1.707912 | 0.471349  |
| H | -6.826467 | -3.140419 | 0.229182  |
| H | -5.170770 | -1.703918 | 1.415239  |
| H | -4.275515 | -3.300118 | -3.273393 |
| H | -6.391439 | -3.933128 | -2.097220 |
| H | -2.504472 | -0.904079 | 2.300837  |
| H | -3.846659 | 0.106850  | 1.688570  |
| H | -0.105163 | 3.049532  | 2.415235  |
| H | -1.097420 | 3.585400  | 3.789496  |
| H | -1.692412 | 3.792990  | 2.118976  |
| H | -1.255900 | 1.099341  | 3.569189  |
| H | -3.904005 | 2.493056  | 2.803950  |
| H | -3.168492 | 2.516209  | 4.426551  |
| H | -3.732545 | 0.979221  | 3.742090  |
| H | -2.313738 | 1.765218  | 0.772427  |
| H | 0.087693  | 1.567536  | 0.757012  |
| H | 1.429273  | 1.393147  | 2.707054  |
| H | 2.712189  | -0.008597 | 4.302511  |
| H | 2.370832  | -2.492128 | 4.354204  |
| H | 0.743399  | -3.543957 | 2.766533  |
| H | -0.525296 | -2.151400 | 1.167991  |
| H | -0.820232 | 1.132690  | -3.084195 |
| H | 0.885116  | 1.537809  | -3.371804 |
| H | 3.557883  | 0.991825  | 0.681196  |
| H | 4.759534  | 1.487177  | -0.555530 |
| H | 2.029536  | 3.274490  | -1.862198 |
| H | 1.697400  | 5.459731  | -0.718511 |
| H | -0.609086 | 6.226178  | -0.113802 |
| H | -2.576644 | 4.776236  | -0.663702 |
| H | -2.233108 | 2.577536  | -1.782805 |
| H | 6.438129  | -0.058620 | -1.317695 |
| H | 7.512794  | -2.303693 | -1.189173 |
| H | 6.363901  | -4.178923 | 0.007867  |
| H | 4.128354  | -3.784509 | 1.069857  |
| H | 3.058292  | -1.542876 | 0.935179  |

Statistical Thermodynamic Analysis  
 Temperature= 298.150 Kelvin Pressure= 1.00000 Atm

---

SCF Energy= -2085.34021963 Predicted Change= -5.563560D-10  
 Zero-point correction (ZPE)= -2084.7419 0.59827  
 Internal Energy (U)= -2084.7050 0.63516  
 Enthalpy (H)= -2084.7041 0.63610  
 Gibbs Free Energy (G)= -2084.8143 0.52589

---

Frequencies -- -85.3683 8.8157 16.5877

183.15K thermal correction = 0.563158  
 Single point SCF = -2085.854273

### B: Acylated-HBTM (S\*\*\*O syn)

Using Gaussian 09: AM64L-G09RevD.01 24-Apr-2013

```
# pbepbe/6-31G*/auto gfprint ginput
scf=(direct,tight,maxcycle=300,xqc)
opt=(maxcycle=250) freq=noraman iop(1/8=18)
Temperature=298.15
SCRF=(PCM,SOLVENT=Dichloromethane)
#N Geom=AllCheck Guess=TCheck SCRF=Check Test GenChk
RPBEPBE/6-31G(d)/Auto
Freq
```

```
Pointgroup= C1 Stoichiometry= C27H27N2OS(1+)
C1[X(C27H27N2OS)] #Atoms= 58
Charge = 1 Multiplicity = 1
```

SCF Energy= -1626.21690894 Predicted Change= -2.215250D-09

```
Optimization completed. {Found 2 times}
Item Max Val. Criteria Pass? RMS Val. Criteria
Pass?
Force 0.00000 || 0.00045 [ YES ] 0.00000 || 0.00030 [
YES ]
Displ 0.00166 || 0.00180 [ YES ] 0.00166 || 0.00180 [
YES ]
```

Atomic Coordinates (Angstroms)

| Type | X | Y | Z |
|------|---|---|---|
|------|---|---|---|

|   |           |           |           |
|---|-----------|-----------|-----------|
| C | -4.892403 | -3.498032 | 0.652155  |
| C | -5.416876 | -2.199984 | 0.485500  |
| C | -4.587237 | -1.110708 | 0.200293  |
| C | -3.210727 | -1.359232 | 0.084461  |
| C | -2.682442 | -2.652952 | 0.256283  |
| C | -3.518682 | -3.741003 | 0.539750  |
| N | -2.202549 | -0.420090 | -0.199871 |
| C | -0.958169 | -0.943512 | -0.226993 |
| S | -0.922682 | -2.664819 | 0.064838  |
| C | -2.489771 | 1.000601  | -0.480819 |
| C | -1.347418 | 1.608335  | -1.294287 |
| C | -1.563072 | 3.118441  | -1.598176 |
| C | -0.549410 | 3.621680  | -2.643484 |
| C | -2.993525 | 3.404758  | -2.095975 |
| C | 0.004362  | 1.313727  | -0.582247 |
| C | 0.223024  | 2.020450  | 0.753412  |
| N | 0.153303  | -0.173527 | -0.442325 |
| C | 1.429449  | -0.809092 | -0.448457 |
| C | 2.651257  | 0.073243  | -0.661765 |
| C | 3.949237  | -0.680833 | -0.458091 |
| O | 1.486300  | -2.026469 | -0.287228 |
| C | -0.308907 | 1.533788  | 1.964747  |
| C | -0.108558 | 2.234139  | 3.162767  |
| C | 0.628254  | 3.427240  | 3.170290  |
| C | 1.174682  | 3.912606  | 1.973721  |
| C | 0.978501  | 3.211094  | 0.776145  |
| C | 4.579974  | -1.326573 | -1.536628 |
| C | 5.783888  | -2.019306 | -1.345061 |
| C | 6.369473  | -2.072939 | -0.071148 |
| C | 5.746344  | -1.430475 | 1.009562  |
| C | 4.542880  | -0.737738 | 0.816130  |
| H | -5.566950 | -4.329526 | 0.874834  |
| H | -6.493574 | -2.035738 | 0.583079  |
| H | -5.001225 | -0.106433 | 0.082623  |
| H | -3.110184 | -4.746960 | 0.670652  |
| H | -2.645298 | 1.525827  | 0.479322  |

|   |           |           |           |
|---|-----------|-----------|-----------|
| H | -3.429405 | 1.024023  | -1.050106 |
| H | 0.500384  | 3.511735  | -2.323089 |
| H | -0.715668 | 4.693460  | -2.842491 |
| H | -0.669494 | 3.079636  | -3.598924 |
| H | -1.410383 | 3.681529  | -0.657742 |
| H | -3.078072 | 4.465352  | -2.385849 |
| H | -3.759474 | 3.219192  | -1.324285 |
| H | -3.240186 | 2.796104  | -2.985036 |
| H | -1.311043 | 1.075501  | -2.265165 |
| H | 0.797427  | 1.617643  | -1.279651 |
| H | 2.592196  | 0.941180  | 0.020329  |
| H | 2.602819  | 0.484218  | -1.689243 |
| H | -0.866021 | 0.591404  | 1.995504  |
| H | -0.526271 | 1.838844  | 4.093887  |
| H | 0.785419  | 3.970359  | 4.107364  |
| H | 1.765256  | 4.833950  | 1.969867  |
| H | 1.424229  | 3.591706  | -0.149728 |
| H | 4.128119  | -1.283469 | -2.534408 |
| H | 6.266944  | -2.514361 | -2.193762 |
| H | 7.311585  | -2.610442 | 0.078085  |
| H | 6.199972  | -1.463874 | 2.005434  |
| H | 4.061357  | -0.233034 | 1.661770  |

Statistical Thermodynamic Analysis  
Temperature= 298.150 Kelvin Pressure= 1.00000 Atm

---

SCF Energy= -1626.21690894 Predicted Change= -  
2.215250D-09  
Zero-point correction (ZPE)= -1625.7458 0.47101  
Internal Energy (U)= -1625.7184 0.49849  
Enthalpy (H)= -1625.7174  
0.49943  
Gibbs Free Energy (G)= -1625.8061  
0.41077

---

Frequencies -- 11.2355 20.0472 28.4408

183.15K thermal correction = 0.441018  
Single point SCF = -1626.585470

**B: Acylated-HBTM (S\*\*\*O anti)**

Using Gaussian 09: AM64L-G09RevD.01 24-Apr-2013

---

```
# pbepbe/6-31G*/auto gfpint gfinput
scf=(direct,tight,maxcycle=300,xqc)
opt=(maxcycle=250) freq=noraman iop(1/8=18)
Temperature=298.15
SCRF=(PCM,SOLVENT=Dichloromethane)
#N Geom=AllCheck Guess=TCheck SCRF=Check Test GenChk
RPBEPBE/6-31G(d)/Auto
Freq
```

---

Pointgroup= C1 Stoichiometry= C27H27N2OS(1+)  
C1[X(C27H27N2OS)] #Atoms= 58  
Charge = 1 Multiplicity = 1

---

SCF Energy= -1626.20455775 Predicted Change= -8.912282D-  
09

---

Optimization completed. {Found 1 times}  
Item Max Val. Criteria Pass? RMS Val. Criteria  
Pass?  
Force 0.00001 || 0.00045 [ YES ] 0.00000 || 0.00030 [ YES ]

Displ 0.00559 || 0.00180 [ NO ] 0.00559 || 0.00180 [ YES ]

| Atomic Coordinates (Angstroms) |           |           |           |
|--------------------------------|-----------|-----------|-----------|
| Type                           | X         | Y         | Z         |
| C                              | -3.686452 | -4.511269 | 0.596843  |
| C                              | -4.523619 | -3.460807 | 0.171238  |
| C                              | -4.006481 | -2.202740 | -0.156027 |
| C                              | -2.619488 | -2.021032 | -0.044279 |
| C                              | -1.787890 | -3.068718 | 0.392207  |
| C                              | -2.303104 | -4.330318 | 0.712552  |
| N                              | -1.893582 | -0.851276 | -0.331119 |
| C                              | -0.558562 | -0.944786 | -0.109159 |
| S                              | -0.111251 | -2.545334 | 0.457480  |
| C                              | -2.564310 | 0.361888  | -0.840142 |
| C                              | -1.545635 | 1.311795  | -1.463137 |
| C                              | -2.186196 | 2.667582  | -1.874193 |
| C                              | -1.209494 | 3.510802  | -2.714558 |
| C                              | -3.496380 | 2.463352  | -2.660406 |
| C                              | -0.334868 | 1.475108  | -0.510123 |
| C                              | -0.585063 | 2.213486  | 0.801602  |
| N                              | 0.278926  | 0.121304  | -0.264288 |
| C                              | 1.732470  | 0.135813  | -0.185257 |
| C                              | 2.488788  | -1.174172 | -0.010810 |
| C                              | 3.989217  | -0.994057 | -0.138448 |
| O                              | 2.287375  | 1.218335  | -0.280281 |
| C                              | -1.240947 | 1.631252  | 1.905602  |
| C                              | -1.463751 | 2.371206  | 3.075793  |
| C                              | -1.034992 | 3.703344  | 3.163077  |
| C                              | -0.369362 | 4.288894  | 2.076650  |
| C                              | -0.139995 | 3.546373  | 0.910611  |
| C                              | 4.632519  | -1.251154 | -1.362138 |
| C                              | 6.021040  | -1.093892 | -1.481915 |
| C                              | 6.779451  | -0.679511 | -0.377113 |
| C                              | 6.143860  | -0.423697 | 0.847770  |
| C                              | 4.756275  | -0.581409 | 0.966154  |
| H                              | -4.120221 | -5.484014 | 0.844183  |
| H                              | -5.601583 | -3.626797 | 0.094137  |
| H                              | -4.665568 | -1.393627 | -0.478201 |
| H                              | -1.649781 | -5.141326 | 1.044273  |
| H                              | -3.110136 | 0.830349  | -0.000887 |
| H                              | -3.295319 | 0.026762  | -1.590417 |
| H                              | -1.687968 | 4.460706  | -3.006015 |
| H                              | -0.927533 | 2.978160  | -3.640784 |
| H                              | -0.282461 | 3.766157  | -2.175106 |
| H                              | -2.423986 | 3.222556  | -0.946316 |
| H                              | -4.294644 | 2.007546  | -2.050430 |
| H                              | -3.334679 | 1.828554  | -3.550848 |
| H                              | -3.874629 | 3.438134  | -3.011074 |
| H                              | -1.156612 | 0.832200  | -2.383454 |
| H                              | 0.452713  | 2.015719  | -1.051696 |
| H                              | 2.131982  | -1.909735 | -0.754807 |
| H                              | 2.247584  | -1.585084 | 0.989008  |
| H                              | -1.566893 | 0.586385  | 1.881786  |
| H                              | -1.970959 | 1.899159  | 3.923140  |
| H                              | -1.209158 | 4.278512  | 4.077911  |
| H                              | -0.014577 | 5.322452  | 2.138610  |
| H                              | 0.402329  | 4.005444  | 0.076915  |
| H                              | 4.044785  | -1.580002 | -2.227045 |
| H                              | 6.510214  | -1.300681 | -2.439295 |
| H                              | 7.863970  | -0.560454 | -0.468594 |
| H                              | 6.730007  | -0.104539 | 1.715641  |
| H                              | 4.264565  | -0.384058 | 1.925432  |

Statistical Thermodynamic Analysis  
Temperature= 298.150 Kelvin Pressure= 1.00000 Atm

SCF Energy= -1626.20455775 Predicted Change= -  
 8.912282D-09  
 Zero-point correction (ZPE)= -1625.7339 0.47060  
 Internal Energy (U)= -1625.7063 0.49820  
 Enthalpy (H)= -1625.7054  
 0.49914  
 Gibbs Free Energy (G)= -1625.7940  
 0.41050

-----  
 Frequencies -- 15.1174 21.8270 30.8820

183.15K thermal correction = 0.440730  
 Single point SCF = -1626.574352

**TS-C: Acylated-HBTM deprotonation via phenylacetate  
 (making E)**

-----  
 Using Gaussian 09: AM64L-G09RevD.01 24-Apr-2013  
 =====

```
# pbepbe/6-31G(d)/auto scf=(maxcycle=300,direct,tight,xqc)
density=current
opt=(maxcycle=250,modredundant)
SCRF=(PCM,SOLVENT=Dichloromethane)
iop(1/8=18) Temperature=298.15
Modredundant Input: B 24 52 F
Modredundant Input: B 52 63 F
Modredundant Input:
# pbepbe/6-31G(d)/auto scf=(direct,tight,maxcycle=300,xqc)
opt=(nofreeze,maxcycle=250,ts,calcfc,noeigentest) iop(1/8=18)
freq=norman
SCRF=(PCM,SOLVENT=Dichloromethane)
Temperature=298.15 geom=check
guess=read
#N Geom=AllCheck Guess=TChek SCRF=Check Test GenChk
RPBEPBE/6-31G(d)/Auto
Freq
```

-----  
 Pointgroup= C1 Stoichiometry= C35H34N2O3S  
 C1[X(C35H34N2O3S)] #Atoms= 75  
 Charge= 0 Multiplicity= 1  
 -----  
 SCF Energy= -2085.32995526 Predicted Change= -1.417691D-  
 09  
 =====

```
Optimization completed. {Found 3 times}
Item Max Val. Criteria Pass? RMS Val. Criteria
Pass?
Force 0.00001 || 0.00045 [ YES ] 0.00000 || 0.00030 [
YES ]
Displ 0.00072 || 0.00180 [ YES ] 0.00072 || 0.00180 [
YES ]
```

-----  
 Atomic Coordinates (Angstroms)  
 Type X Y Z  
 -----  
 C -5.004534 -2.801717 0.512805  
 C -3.752371 -2.352368 0.952953  
 C -2.879041 -1.816768 -0.005734  
 C -3.237259 -1.741819 -1.363619  
 C -4.491965 -2.189734 -1.795934  
 C -5.373346 -2.720740 -0.843701  
 N -1.592746 -1.297353 0.223486  
 C -0.957465 -0.865231 -0.895980  
 S -1.937739 -1.020914 -2.346854  
 C -1.028938 -1.164626 1.576976  
 C 0.111578 -0.147021 1.582373  
 C 0.811116 -0.074942 2.969172

|   |           |           |           |
|---|-----------|-----------|-----------|
| C | 1.802884  | 1.101286  | 3.042940  |
| C | -0.215784 | 0.054619  | 4.113215  |
| C | 1.076404  | -0.451579 | 0.397133  |
| C | 1.846813  | -1.767621 | 0.513143  |
| N | 0.303099  | -0.383270 | -0.876139 |
| C | 1.323335  | -3.000503 | 0.074055  |
| C | 2.045580  | -4.190923 | 0.246105  |
| C | 3.306390  | -4.170662 | 0.858703  |
| C | 3.845565  | -2.948087 | 1.284435  |
| C | 3.125150  | -1.758966 | 1.107466  |
| C | 0.843446  | 0.167796  | -2.130063 |
| C | 2.008141  | 0.997647  | -2.159309 |
| C | 3.323641  | 0.838903  | -1.439188 |
| O | 0.087240  | 0.000487  | -3.122566 |
| C | 3.731723  | 1.707521  | -0.402163 |
| C | 5.010692  | 1.602678  | 0.169419  |
| C | 5.918380  | 0.637326  | -0.292342 |
| C | 5.533989  | -0.226460 | -1.329867 |
| C | 4.254373  | -0.124036 | -1.893551 |
| H | -5.703380 | -3.224718 | 1.240486  |
| H | -3.470806 | -2.426681 | 2.006537  |
| H | -4.775364 | -2.128743 | -2.851252 |
| H | -6.357255 | -3.078632 | -1.161152 |
| H | -0.692526 | -2.161145 | 1.919809  |
| H | -1.851261 | -0.828638 | 2.226544  |
| H | 2.263565  | 1.141583  | 4.045148  |
| H | 1.288576  | 2.058865  | 2.853533  |
| H | 2.618859  | 1.023151  | 2.305764  |
| H | 1.369536  | -1.019565 | 3.120008  |
| H | 0.309695  | 0.195084  | 5.073118  |
| H | -0.852105 | -0.840417 | 4.219611  |
| H | -0.873334 | 0.930376  | 3.960439  |
| H | -0.314745 | 0.852764  | 1.371977  |
| H | 1.789163  | 0.380460  | 0.342131  |
| H | 0.352186  | -3.047073 | -0.429107 |
| H | 1.619215  | -5.135476 | -0.107290 |
| H | 3.870550  | -5.099641 | 0.991095  |
| H | 4.839054  | -2.913722 | 1.743490  |
| H | 3.574890  | -0.808506 | 1.411888  |
| H | 1.254487  | 2.330736  | -1.804462 |
| H | 2.179677  | 1.225740  | -3.225011 |
| H | 3.023004  | 2.459235  | -0.035387 |
| H | 5.301357  | 2.289153  | 0.972859  |
| H | 6.918486  | 0.561587  | 0.148205  |
| H | 6.232794  | -0.983765 | -1.702517 |
| H | 3.963375  | -0.799308 | -2.706807 |
| O | 0.867500  | 3.097235  | 0.510249  |
| C | 0.246312  | 3.498424  | -0.486241 |
| C | -1.028995 | 4.348329  | -0.332204 |
| C | -2.149889 | 3.461691  | 0.179225  |
| O | 0.543824  | 3.218357  | -1.742346 |
| C | -2.954044 | 2.733540  | -0.719896 |
| C | -3.943938 | 1.857923  | -0.249506 |
| C | -4.143063 | 1.693220  | 1.130646  |
| C | -3.348191 | 2.414720  | 2.035471  |
| C | -2.358308 | 3.289817  | 1.562126  |
| H | -1.293639 | 4.800051  | -1.301268 |
| H | -0.816959 | 5.153569  | 0.391112  |
| H | -2.797832 | 2.852923  | -1.798213 |
| H | -4.560242 | 1.300697  | -0.963045 |
| H | -4.916343 | 1.009751  | 1.497024  |
| H | -3.502196 | 2.301945  | 3.114356  |
| H | -1.737925 | 3.848910  | 2.271554  |

-----  
 Statistical Thermodynamic Analysis  
 Temperature= 298.150 Kelvin Pressure= 1.00000 Atm  
 =====  
 SCF Energy= -2085.32995526 Predicted Change= -  
 1.417691D-09

Zero-point correction (ZPE)= -2084.7351 0.59483  
 Internal Energy (U)= -2084.6981 0.63184  
 Enthalpy (H)= -2084.6971  
 0.63279  
 Gibbs Free Energy (G)= -2084.8066  
 0.52334

-----  
 Frequencies -- -356.6253 18.2467 20.6046

183.15K thermal correction = 0.560310

Single point SCF = -2085.849566

**TS-C: Acylated-HBTM deprotonation via N,N-diisopropylethylamine (making E)**

-----  
 Using Gaussian 09: AM64L-G09RevD.01 24-Apr-2013

=====  
 # pbepbe/6-31G(d)/auto gfpriint gfinput  
 scf=(direct,tight,maxcycle=300,xqc)  
 opt=(maxcycle=250,calcf,ts,noeigentest) freq=noraman  
 SCRF=(PCM,SOLVENT=Dichloromethane) iop(1/8=18)  
 Temperature=298.15  
 #N Geom=AllCheck Guess=TCheck SCRF=Check Test GenChk  
 RPBEPBE/6-31G(d)/Auto  
 Freq

-----  
 Pointgroup= C1 Stoichiometry= C35H46N3OS(1+)

C1[X(C35H46N3OS)] #Atoms= 86

Charge = 1 Multiplicity = 1

-----  
 SCF Energy= -1996.71555859 Predicted Change= -1.876866D-10

=====  
 Optimization completed. {Found 2 times}  
 Item Max Val. Criteria Pass? RMS Val. Criteria  
 Pass?  
 Force 0.00000 || 0.00045 [ YES ] 0.00000 || 0.00030 [ YES ]  
 Displ 0.00023 || 0.00180 [ YES ] 0.00023 || 0.00180 [ YES ]

-----  
 Atomic Coordinates (Angstroms)  
 Type X Y Z  
 -----  
 C 6.358903 -2.209897 -0.518428  
 C 5.503723 -1.205872 -0.048655  
 C 4.136488 -1.328751 -0.340192  
 C 3.642283 -2.413469 -1.086285  
 C 4.503073 -3.413907 -1.556007  
 C 5.867614 -3.301700 -1.260635  
 N 3.107792 -0.446752 0.039832  
 C 1.875312 -0.803247 -0.398829  
 S 1.890388 -2.284724 -1.340177  
 C 3.357362 0.746996 0.863632  
 C 2.077616 1.145296 1.595527  
 C 2.260479 2.432553 2.450647  
 C 1.067728 2.648941 3.400666  
 C 3.565063 2.395616 3.271270  
 C 0.904254 1.240876 0.576301  
 C 0.974381 2.403369 -0.410900  
 N 0.761099 -0.069141 -0.137018  
 C 1.734772 2.341051 -1.595772  
 C 1.792462 3.440056 -2.464738  
 C 1.089753 4.616069 -2.165757  
 C 0.321980 4.685620 -0.994338  
 C 0.261429 3.586008 -0.127594  
 C -0.497973 -0.483338 -0.767011

C -1.711561 0.238930 -0.461046  
 C -2.751244 0.405715 -1.529326  
 O -0.421280 -1.503617 -1.484236  
 C -3.607692 1.530744 -1.445104  
 C -4.621932 1.750803 -2.384929  
 C -4.808175 0.853087 -3.448171  
 C -3.963979 -0.261578 -3.551555  
 C -2.953827 -0.490869 -2.604579  
 H 7.429131 -2.138180 -0.304732  
 H 5.897193 -0.357138 0.516188  
 H 4.120116 -4.257902 -2.137170  
 H 6.559114 -4.071532 -1.614916  
 H 3.732364 1.559135 0.213709  
 H 4.146669 0.479748 1.580099  
 H 1.224073 3.562352 3.998734  
 H 0.964544 1.801327 4.102463  
 H 0.106988 2.769293 2.872603  
 H 2.318823 3.294270 1.758721  
 H 3.612241 3.278202 3.930803  
 H 4.467314 2.417214 2.637410  
 H 3.613309 1.497128 3.913311  
 H 1.822104 0.317698 2.287622  
 H -0.008728 1.344551 1.179080  
 H 2.272720 1.426627 -1.867732  
 H 2.384138 3.370191 -3.382903  
 H 1.132372 5.470798 -2.848099  
 H -0.241928 5.593260 -0.757270  
 H -0.353830 3.649556 0.777557  
 H -2.390740 -0.526005 0.565161  
 H -1.546772 1.196102 0.046555  
 H -3.465011 2.250543 -0.629411  
 H -5.263278 2.633837 -2.289936  
 H -5.598514 1.023208 -4.186547  
 H -4.090129 -0.968913 -4.378827  
 H -2.301318 -1.360431 -2.708211  
 N -3.139835 -1.120729 1.536755  
 C -2.871231 -2.622012 1.511961  
 C -2.870286 -3.232754 0.101680  
 C -3.765014 -3.414902 2.478917  
 C -2.676171 -0.509329 2.861561  
 C -2.887629 1.015625 2.905391  
 C -1.212573 -0.859641 3.186226  
 C -4.581200 -0.718205 1.324601  
 C -5.367121 -1.349073 0.175938  
 H -2.249869 -2.650802 -0.597430  
 H -3.874590 -3.355163 -0.326177  
 H -2.421831 -4.238540 0.179602  
 H -4.824482 -3.400312 2.174707  
 H -3.697292 -3.050318 3.517195  
 H -3.435253 -4.467118 2.479014  
 H -1.832780 -2.708102 1.864480  
 H -2.457130 1.397572 3.845183  
 H -3.949743 1.302496 2.898886  
 H -2.385597 1.534754 2.071832  
 H -1.087219 -1.894933 3.539235  
 H -0.859201 -0.201530 3.996197  
 H -0.547292 -0.712168 2.318273  
 H -3.318559 -0.947393 3.649533  
 H -5.624787 -2.403662 0.355170  
 H -4.846291 -1.261430 -0.789939  
 H -6.316090 -0.791903 0.093533  
 H -4.556744 0.367673 1.152815  
 H -5.119995 -0.886052 2.276577

-----  
 Statistical Thermodynamic Analysis  
 Temperature= 298.150 Kelvin Pressure= 1.00000 Atm

=====  
 SCF Energy= -1996.71555859 Predicted Change= -1.876866D-10

Zero-point correction (ZPE)= -1995.9891 0.72638  
 Internal Energy (U)= -1995.9487 0.76681  
 Enthalpy (H)= -1995.9478  
 0.76775  
 Gibbs Free Energy (G)= -1996.0618  
 0.65371

-----  
 Frequencies -- -1210.8386 15.8932 23.4710

183.15K thermal correction = 0.691925

Single point SCF = -1997.185500

**TS-C: Acylated-HBTM deprotonation via N,N-diisopropylethylamine (making Z)**

-----  
 Using Gaussian 09: AM64L-G09RevD.01 24-Apr-2013

=====

```
# pbepbe/6-31G(d)/auto scf=(maxcycle=300,direct,tight,xqc)
density=current
opt=(maxcycle=250,modredundant)
SCRF=(PCM,SOLVENT=Dichloromethane)
iop(1/8=18) Temperature=298.15
Modredundant Input: B 53 59 F
Modredundant Input: B 24 53 F
Modredundant Input:
# pbepbe/6-31G(d)/auto scf=(direct,tight,maxcycle=300,xqc)
opt=(nofreeze,maxcycle=250,ts,calcf,oeigentest) iop(1/8=18)
freq=normal
SCRF=(PCM,SOLVENT=Dichloromethane)
Temperature=298.15 geom=check
guess=read
#N Geom=AllCheck Guess=TChech SCRF=Check Test GenChk
RPBEPBE/6-31G(d)/Auto
Freq
```

-----  
 Pointgroup= C1 Stoichiometry= C35H46N3OS(1+)  
 C1[X(C35H46N3OS)] #Atoms= 86  
 Charge = 1 Multiplicity = 1

-----  
 SCF Energy= -1996.70507884 Predicted Change= -1.261661D-10

-----  
 Optimization completed. {Found 3 times}  
 Item Max Val. Criteria Pass? RMS Val. Criteria  
 Pass?  
 Force 0.00000 || 0.00045 [ YES ] 0.00000 || 0.00030 [ YES ]  
 Displ 0.00029 || 0.00180 [ YES ] 0.00029 || 0.00180 [ YES ]

-----  
 Atomic Coordinates (Angstroms)  
 Type X Y Z

|   |          |           |           |
|---|----------|-----------|-----------|
| C | 6.076180 | -2.494441 | 0.389368  |
| C | 5.217560 | -1.419834 | 0.649752  |
| C | 3.897482 | -1.516593 | 0.182999  |
| C | 3.453070 | -2.644803 | -0.528606 |
| C | 4.316662 | -3.717943 | -0.784423 |
| C | 5.633804 | -3.630776 | -0.316393 |
| N | 2.872738 | -0.565546 | 0.343208  |
| C | 1.693880 | -0.909790 | -0.231668 |
| S | 1.758237 | -2.471359 | -1.028747 |
| C | 3.088346 | 0.696178  | 1.071195  |
| C | 1.751608 | 1.294973  | 1.497997  |
| C | 1.930520 | 2.682355  | 2.178125  |
| C | 0.628170 | 3.150778  | 2.851197  |
| C | 3.066196 | 2.671113  | 3.221542  |

|   |           |           |           |
|---|-----------|-----------|-----------|
| C | 0.786007  | 1.309618  | 0.276175  |
| C | 1.181443  | 2.244772  | -0.865626 |
| N | 0.598758  | -0.098297 | -0.198528 |
| C | 2.117535  | 1.897215  | -1.860695 |
| C | 2.471786  | 2.813767  | -2.861593 |
| C | 1.895788  | 4.091907  | -2.886352 |
| C | 0.952703  | 4.443852  | -1.910083 |
| C | 0.594595  | 3.526147  | -0.913123 |
| C | -0.614910 | -0.575151 | -0.852171 |
| C | -1.927061 | 0.046326  | -0.772686 |
| C | -2.327142 | 1.441364  | -0.394266 |
| O | -0.474946 | -1.670217 | -1.452771 |
| C | -2.416608 | 1.906700  | 0.940019  |
| C | -2.895596 | 3.192854  | 1.236613  |
| C | -3.321433 | 4.046632  | 0.207955  |
| C | -3.266528 | 3.595805  | -1.120135 |
| C | -2.777841 | 2.315588  | -1.412344 |
| H | 7.110591  | -2.444539 | 0.741148  |
| H | 5.574403  | -0.539544 | 1.189947  |
| H | 3.971462  | -4.596983 | -1.336681 |
| H | 6.327161  | -4.455444 | -0.505126 |
| H | 3.653718  | 1.384971  | 0.415846  |
| H | 3.707994  | 0.459208  | 1.947741  |
| H | 0.782224  | 4.134990  | 3.325090  |
| H | 0.318540  | 2.443300  | 3.642595  |
| H | -0.211474 | 3.255241  | 2.145038  |
| H | 2.200651  | 3.412185  | 1.390746  |
| H | 3.103532  | 3.644828  | 3.738418  |
| H | 4.060076  | 2.506446  | 2.772326  |
| H | 2.899881  | 1.893351  | 3.989633  |
| H | 1.297353  | 0.610184  | 2.242303  |
| H | -0.197782 | 1.622119  | 0.643047  |
| H | 2.570734  | 0.900789  | -1.882655 |
| H | 3.198206  | 2.521541  | -3.626558 |
| H | 2.172123  | 4.805479  | -3.669154 |
| H | 0.481721  | 5.431898  | -1.929013 |
| H | -0.165162 | 3.802707  | -0.174150 |
| H | -2.384525 | -0.206224 | -1.743107 |
| H | -2.746683 | -0.976828 | -0.061005 |
| H | -2.126226 | 1.247518  | 1.764662  |
| H | -2.951032 | 3.518970  | 2.280864  |
| H | -3.703533 | 5.045858  | 0.440098  |
| H | -3.602554 | 4.245396  | -1.935453 |
| H | -2.738839 | 1.978217  | -2.454626 |
| N | -3.503119 | -1.982143 | 0.394939  |
| C | -3.571099 | -2.993552 | -0.752233 |
| C | -4.277248 | -2.418282 | -1.988236 |
| C | -4.230795 | -4.329194 | -0.365001 |
| C | -2.785605 | -2.546783 | 1.622008  |
| C | -2.414148 | -1.418588 | 2.597133  |
| C | -1.527227 | -3.361533 | 1.291037  |
| C | -4.888686 | -1.513362 | 0.793130  |
| C | -5.305310 | -0.144726 | 0.255978  |
| H | -3.843776 | -1.465470 | -2.326555 |
| H | -5.357466 | -2.272993 | -1.820167 |
| H | -4.168536 | -3.142278 | -2.812753 |
| H | -5.320692 | -4.229265 | -0.224562 |
| H | -3.809627 | -4.783010 | 0.545063  |
| H | -4.076072 | -5.041926 | -1.192377 |
| H | -2.517275 | -3.164946 | -1.020124 |
| H | -2.119704 | -1.864323 | 3.561349  |
| H | -3.241954 | -0.719269 | 2.795672  |
| H | -1.552694 | -0.842319 | 2.219155  |
| H | -1.741698 | -4.310905 | 0.777943  |
| H | -1.022749 | -3.609385 | 2.239696  |
| H | -0.821466 | -2.790363 | 0.668403  |
| H | -3.515217 | -3.214430 | 2.118162  |
| H | -5.247549 | -0.083641 | -0.842063 |
| H | -4.691627 | 0.665421  | 0.678104  |
| H | -6.354398 | 0.034878  | 0.547137  |

```

H   -4.938337  -1.499861  1.892542
H   -5.609183  -2.281718  0.468649

```

```

-----
Statistical Thermodynamic Analysis
Temperature= 298.150 Kelvin   Pressure= 1.00000 Atm
=====

```

```

SCF Energy= -1996.70507884      Predicted Change= -
1.261661D-10
Zero-point correction (ZPE)= -1995.9787      0.72635
Internal Energy (U)= -1995.9384      0.76663
Enthalpy (H)= -1995.9374
0.76758
Gibbs Free Energy (G)= -1996.0507
0.65431

```

```

-----
Frequencies -- -1279.9778      14.3501      26.0309

```

```

183.15K thermal correction = 0.692230
Single point SCF = -1997.174801

```

#### D: (Z)-enolate (S••O anti)

```

-----
Using Gaussian 09: AM64L-G09RevD.01 24-Apr-2013
=====

```

```

# pbepbe/6-31G*/auto gffprint gffinput
scf=(direct,tight,maxcycle=300,xqc)
opt=(maxcycle=250) freq=noraman iop(1/8=18)
Temperature=298.15
SCRF=(PCM,SOLVENT=Dichloromethane)
#N Geom=AllCheck Guess=TCheck SCRF=Check Test GenChk
RPBEPBE/6-31G(d)/Auto
Freq

```

```

-----
Pointgroup= C1  Stoichiometry= C27H26N2OS
C1[X(C27H26N2OS)] #Atoms= 57
Charge = 0      Multiplicity = 1

```

```

-----
SCF Energy= -1625.74017858      Predicted Change= -9.818437D-
09
=====

```

```

-----
Optimization completed.      {Found 2 times}
Item  Max Val.  Criteria  Pass?  RMS Val.  Criteria
Pass?
Force  0.00002 || 0.00045 [ YES ]  0.00000 || 0.00030 [
YES ]
Displ  0.00072 || 0.00180 [ YES ]  0.00072 || 0.00180 [
YES ]

```

```

-----
Atomic  Coordinates (Angstroms)
Type  X      Y      Z
-----
C      3.325906  4.502535  0.725783
C      3.258182  3.122419  0.485897
C      1.995632  2.553819  0.265785
C      0.830612  3.347632  0.294630
C      0.901861  4.722391  0.538870
C      2.165086  5.295377  0.752084
N      1.707695  1.204108  0.002049
C      0.379238  0.935375  -0.170306
S     -0.634152  2.368173  0.027785
C      2.720256  0.153381  -0.187011
C      2.189336  -0.884946  -1.182733
C      3.221889  -2.008092  -1.511532
C      4.144192  -1.561405  -2.662427
C      4.064805  -2.485391  -0.313388
C      0.799201  -1.410562  -0.729349

```

```

C      0.783677  -2.387723  0.440817
N     -0.103706  -0.264891  -0.462248
C      0.693981  -3.768146  0.175846
C      0.723799  -4.703307  1.220050
C      0.829496  -4.268479  2.549407
C      0.895167  -2.894508  2.827005
C      0.868498  -1.960770  1.781154
C     -1.578618  -0.457088  -0.894925
C     -2.475013  -0.007041  0.070580
C     -3.920160  0.037212  -0.075666
O     -1.704029  -0.987529  -2.020259
C     -4.606119  -0.337215  -1.265439
C     -6.001655  -0.271101  -1.345872
C     -6.770626  0.166298  -0.253609
C     -6.112336  0.539052  0.930918
C     -4.717856  0.476577  1.017539
H      4.302840  4.963681  0.898290
H      4.166005  2.513590  0.477815
H     -0.004403  5.334868  0.561596
H      2.242272  6.369664  0.943288
H      2.959707  -0.296750  0.792334
H      3.631128  0.633357  -0.578003
H      4.749037  -0.680646  -2.377854
H      3.567073  -1.299824  -3.566308
H      4.846566  -2.369768  -2.929318
H      2.636766  -2.874087  -1.876866
H      4.748129  -1.692989  0.041776
H      4.692766  -3.338885  -0.621658
H      3.445335  -2.813936  0.536304
H      1.988989  -0.343116  -2.127373
H      0.334301  -1.902214  -1.602739
H      0.596418  -4.113011  -0.859958
H      0.653102  -5.772217  0.993899
H      0.847232  -4.996089  3.367321
H      0.959977  -2.545395  3.862757
H      0.895616  -0.891465  2.018491
H     -2.071425  0.257651  1.053152
H     -4.015823  -0.685120  -2.117735
H     -6.498068  -0.567937  -2.277577
H     -7.862611  0.214069  -0.323027
H     -6.691699  0.882080  1.796206
H     -4.219072  0.771661  1.949434

```

```

-----
Statistical Thermodynamic Analysis
Temperature= 298.150 Kelvin   Pressure= 1.00000 Atm
=====

```

```

SCF Energy= -1625.74017858      Predicted Change= -
9.818437D-09
Zero-point correction (ZPE)= -1625.2830      0.45711
Internal Energy (U)= -1625.2555      0.48463
Enthalpy (H)= -1625.2546
0.48557
Gibbs Free Energy (G)= -1625.3420
0.39808

```

```

-----
Frequencies -- 16.6347      23.4095      38.7354

```

```

183.15K thermal correction = 0.427861
Single point SCF = -1626.119655

```

#### D: (E)-enolate (S••O syn)

```

-----
Using Gaussian 09: AM64L-G09RevD.01 24-Apr-2013
=====

```

```

# pbepbe/6-31G*/auto gffprint gffinput
scf=(direct,tight,maxcycle=300,xqc)

```

opt=(maxcycle=250) freq=norman iop(1/8=18)  
 Temperature=298.15  
 SCRF=(PCM,SOLVENT=Dichloromethane)  
 #N Geom=AllCheck Guess=TCheck SCRF=Check Test GenChk  
 RPBEPBE/6-31G(d)/Auto  
 Freq

Pointgroup= C1 Stoichiometry= C27H26N2OS  
 C1[X(C27H26N2OS)] #Atoms= 57  
 Charge = 0 Multiplicity = 1

SCF Energy= -1625.73165731 Predicted Change= -1.139425D-08

=====  
 Optimization completed. {Found 2 times}  
 Item Max Val. Criteria Pass? RMS Val. Criteria  
 Pass?  
 Force 0.00002 || 0.00045 [ YES ] 0.00000 || 0.00030 [ YES ]  
 Displ 0.00117 || 0.00180 [ YES ] 0.00117 || 0.00180 [ YES ]

|   | Atomic Coordinates (Angstroms) |           |           |   |
|---|--------------------------------|-----------|-----------|---|
|   | Type                           | X         | Y         | Z |
| C | 5.565261                       | -0.165844 | 1.313455  |   |
| C | 4.239046                       | 0.277220  | 1.416945  |   |
| C | 3.287991                       | -0.296691 | 0.560811  |   |
| C | 3.653339                       | -1.277096 | -0.383067 |   |
| C | 4.980122                       | -1.710079 | -0.485333 |   |
| C | 5.933686                       | -1.149058 | 0.377349  |   |
| N | 1.911323                       | -0.014942 | 0.515793  |   |
| C | 1.227716                       | -0.718812 | -0.430038 |   |
| S | 2.271302                       | -1.754245 | -1.400349 |   |
| C | 1.258907                       | 0.977957  | 1.384791  |   |
| C | -0.242124                      | 0.695891  | 1.471328  |   |
| C | -1.018679                      | 1.739403  | 2.332913  |   |
| C | -0.973519                      | 1.337183  | 3.819987  |   |
| C | -0.558214                      | 3.199239  | 2.161413  |   |
| C | -0.843301                      | 0.467415  | 0.056519  |   |
| C | -0.938830                      | 1.680655  | -0.861825 |   |
| N | -0.098439                      | -0.650706 | -0.589655 |   |
| C | -2.188960                      | 2.315128  | -1.006201 |   |
| C | -2.326750                      | 3.460719  | -1.802193 |   |
| C | -1.215600                      | 3.982144  | -2.481181 |   |
| C | 0.029124                       | 3.345839  | -2.363982 |   |
| C | 0.166832                       | 2.203230  | -1.562716 |   |
| C | -0.717220                      | -1.442815 | -1.715889 |   |
| C | -2.058617                      | -1.809557 | -1.616548 |   |
| C | -2.963115                      | -1.938193 | -0.487852 |   |
| O | 0.078891                       | -1.664133 | -2.675464 |   |
| C | -2.550443                      | -2.100377 | 0.867833  |   |
| C | -3.477896                      | -2.238785 | 1.908187  |   |
| C | -4.857323                      | -2.254134 | 1.644875  |   |
| C | -5.290481                      | -2.136896 | 0.311667  |   |
| C | -4.368396                      | -1.982440 | -0.726825 |   |
| H | 6.322708                       | 0.266607  | 1.973855  |   |
| H | 3.964490                       | 1.047925  | 2.141908  |   |
| H | 5.265822                       | -2.468372 | -1.220710 |   |
| H | 6.974788                       | -1.479484 | 0.315941  |   |
| H | 1.465807                       | 1.982846  | 0.974833  |   |
| H | 1.725003                       | 0.910401  | 2.381023  |   |
| H | 0.062472                       | 1.330941  | 4.205886  |   |
| H | -1.402353                      | 0.332305  | 3.978854  |   |
| H | -1.549252                      | 2.052650  | 4.432083  |   |
| H | -2.076115                      | 1.679725  | 2.009454  |   |
| H | 0.448392                       | 3.359939  | 2.588275  |   |
| H | -1.248468                      | 3.869600  | 2.701556  |   |
| H | -0.540506                      | 3.515654  | 1.106120  |   |

|   |           |           |           |
|---|-----------|-----------|-----------|
| H | -0.359846 | -0.283120 | 1.974847  |
| H | -1.861860 | 0.085892  | 0.216681  |
| H | -3.064599 | 1.902614  | -0.491912 |
| H | -3.307096 | 3.938108  | -1.900960 |
| H | -1.321069 | 4.872901  | -3.108951 |
| H | 0.898800  | 3.734926  | -2.903454 |
| H | 1.143996  | 1.712051  | -1.507226 |
| H | -2.456598 | -2.156053 | -2.578019 |
| H | -1.479500 | -2.158811 | 1.093856  |
| H | -3.114553 | -2.361025 | 2.935541  |
| H | -5.580095 | -2.371409 | 2.458850  |
| H | -6.361853 | -2.160393 | 0.080453  |
| H | -4.726016 | -1.883378 | -1.758989 |

=====  
 Statistical Thermodynamic Analysis  
 Temperature= 298.150 Kelvin Pressure= 1.00000 Atm

=====  
 SCF Energy= -1625.73165731 Predicted Change= -1.139425D-08  
 Zero-point correction (ZPE)= -1625.2742 0.45739  
 Internal Energy (U)= -1625.2469 0.48470  
 Enthalpy (H)= -1625.2460 0.48565  
 Gibbs Free Energy (G)= -1625.3325 0.39907

=====  
 Frequencies -- 17.0245 29.5215 35.8084

183.15K thermal correction = 0.428512  
 Single point SCF = -1626.111285

#### D: (E)-enolate (S\*\*\*O anti)

=====  
 Using Gaussian 09: AM64L-G09RevD.01 24-Apr-2013

=====  
 # pbepbe/6-31G\*/auto gfpnt gfinpt  
 scf=(direct,tight,maxcycle=300,xqc)  
 opt=(maxcycle=250) freq=norman iop(1/8=18)  
 Temperature=298.15  
 SCRF=(PCM,SOLVENT=Dichloromethane)  
 #N Geom=AllCheck Guess=TCheck SCRF=Check Test GenChk  
 RPBEPBE/6-31G(d)/Auto  
 Freq

=====  
 Pointgroup= C1 Stoichiometry= C27H26N2OS  
 C1[X(C27H26N2OS)] #Atoms= 57  
 Charge = 0 Multiplicity = 1

=====  
 SCF Energy= -1625.72956714 Predicted Change= -5.417843D-08

=====  
 Optimization completed. {Found 1 times}  
 Item Max Val. Criteria Pass? RMS Val. Criteria  
 Pass?  
 Force 0.00004 || 0.00045 [ YES ] 0.00000 || 0.00030 [ YES ]  
 Displ 0.00213 || 0.00180 [ NO ] 0.00213 || 0.00180 [ YES ]

|   | Atomic Coordinates (Angstroms) |          |           |   |
|---|--------------------------------|----------|-----------|---|
|   | Type                           | X        | Y         | Z |
| C | 1.598162                       | 4.740841 | -1.573161 |   |
| C | 0.545178                       | 3.858210 | -1.293867 |   |
| C | 0.832157                       | 2.710637 | -0.540827 |   |
| C | 2.140626                       | 2.450918 | -0.084525 |   |

```

C   3.188125   3.334149  -0.366490
C   2.903757   4.484950  -1.116693
N   -0.070589   1.708618  -0.147831
C   0.495871   0.692948   0.570485
S   2.223340   0.927807   0.828724
C   -1.530840   1.808132  -0.310299
C   -2.215630   1.040390   0.824703
C   -3.772396   1.130185   0.783915
C   -4.247377   2.404842   1.508185
C   -4.397221   1.059316  -0.622718
C   -1.657891  -0.407131   0.908485
C   -2.106177  -1.363053  -0.188984
N   -0.173601  -0.362128   1.030898
C   -3.105550  -2.310356   0.107458
C   -3.596746  -3.173937  -0.882229
C   -3.084155  -3.112155  -2.186201
C   -2.074094  -2.186981  -2.490691
C   -1.588317  -1.320087  -1.500802
C   0.430140  -1.150595   2.228626
C   1.651819  -1.786887   2.007466
C   2.327644  -2.245005   0.800517
O   -0.248893  -1.030951   3.271119
C   3.701203  -2.611791   0.892142
C   4.416658  -3.083325  -0.213093
C   3.794438  -3.209618  -1.466905
C   2.436060  -2.869002  -1.579047
C   1.714397  -2.407537  -0.472235
H   1.394877   5.641170  -2.160446
H   -0.464352   4.059578  -1.662140
H   4.202724   3.131145  -0.011092
H   3.709749   5.187094  -1.349206
H   -1.813832   1.420628  -1.304229
H   -1.794541   2.877101  -0.270370
H   -3.885412   3.316758   0.998441
H   -3.890885   2.434545   2.552427
H   -5.349957   2.452645   1.523877
H   -4.148605   0.263722   1.362049
H   -4.151848   1.955343  -1.221367
H   -5.496557   1.022266  -0.534272
H   -4.075280   0.169269  -1.186378
H   -1.888809   1.512450   1.771899
H   -1.975836  -0.813133   1.884645
H   -3.503280  -2.370849   1.126951
H   -4.374302  -3.902278  -0.629943
H   -3.461579  -3.788703  -2.959768
H   -1.657158  -2.140406  -3.502076
H   -0.784436  -0.620873  -1.755552
H   2.137715  -2.074131   2.948691
H   4.206455  -2.514189   1.861058
H   5.472694  -3.353283  -0.094909
H   4.352766  -3.578010  -2.333877
H   1.920260  -2.982204  -2.540232
H   0.647432  -2.196735  -0.583481

```

Statistical Thermodynamic Analysis  
Temperature= 298.150 Kelvin Pressure= 1.00000 Atm

```

SCF Energy= -1625.72956714 Predicted Change= -
5.417843D-08
Zero-point correction (ZPE)= -1625.2724 0.45710
Internal Energy (U)= -1625.2450 0.48452
Enthalpy (H)= -1625.2440
0.48547
Gibbs Free Energy (G)= -1625.3308
0.39869

```

Frequencies -- 20.1716 28.7155 29.4143

183.15K thermal correction = 0.428198

Single point SCF = -1626.109982

#### D: (Z)-enolate/ketone complex

Using Gaussian 09: AM64L-G09RevD.01 24-Apr-2013

```

# pbepbe/6-31G*/auto ginput ginput
scf=(direct,tight,maxcycle=300,xqc)
opt=(maxcycle=250) freq=noraman iop(1/8=18)
Temperature=298.15
SCRF=(PCM,SOLVENT=Dichloromethane)
#N Geom=AllCheck Guess=TCheck SCRF=Check Test GenChk
RPBEPBE/6-31G(d)/Auto
Freq

```

```

Pointgroup= C1 Stoichiometry= C35H30BrF3N2O2S
C1[X(C35H30BrF3N2O2S)] #Atoms= 74
Charge = 0 Multiplicity = 1

```

SCF Energy= -4878.34580530 Predicted Change= -4.200142D-08

```

Optimization completed. {Found 1 times}
Item Max Val. Criteria Pass? RMS Val. Criteria
Pass?
Force 0.00001 || 0.00045 [ YES ] 0.00000 || 0.00030 [
YES ]
Displ 0.00376 || 0.00180 [ NO ] 0.00376 || 0.00180 [
YES ]

```

Atomic Coordinates (Angstroms)

| Type | X | Y | Z |
|------|---|---|---|
|------|---|---|---|

|   |           |           |           |
|---|-----------|-----------|-----------|
| N | -3.250129 | 1.248506  | -0.287598 |
| C | -3.994022 | 0.310289  | 0.565179  |
| C | -3.022709 | -0.658400 | 1.240940  |
| C | -3.758886 | -1.719924 | 2.106819  |
| C | -4.817924 | -1.075377 | 3.024632  |
| C | -2.774886 | -2.536927 | 2.966229  |
| C | -2.081544 | -1.277508 | 0.163597  |
| C | -2.756011 | -2.245954 | -0.807564 |
| N | -1.377383 | -0.185171 | -0.563386 |
| C | 0.003248  | -0.354691 | -1.105668 |
| C | 0.552498  | -1.632998 | -1.039156 |
| C | 1.893988  | -1.996979 | -1.453908 |
| O | 0.499398  | 0.716325  | -1.576114 |
| C | -1.991656 | 0.991677  | -0.743763 |
| S | -1.295706 | 2.346169  | -1.632725 |
| C | -2.818001 | 3.247751  | -1.401083 |
| C | -3.753377 | 2.509044  | -0.653293 |
| C | -3.127060 | 4.535705  | -1.853998 |
| C | -4.390967 | 5.065306  | -1.552864 |
| C | -5.324760 | 4.317929  | -0.812173 |
| C | -5.020933 | 3.028542  | -0.351908 |
| C | -3.444447 | -1.798734 | -1.952981 |
| C | -4.081936 | -2.709889 | -2.807394 |
| C | -4.039594 | -4.084811 | -2.534576 |
| C | -3.346274 | -4.543599 | -1.405279 |
| C | -2.707472 | -3.631677 | -0.553281 |
| C | 2.874491  | -1.075631 | -1.921576 |
| C | 4.165376  | -1.499466 | -2.257505 |
| C | 4.531718  | -2.853202 | -2.164543 |
| C | 3.575040  | -3.783116 | -1.720820 |
| C | 2.288788  | -3.363801 | -1.369486 |
| H | -4.745833 | -0.223003 | -0.046833 |
| H | -4.523392 | 0.913496  | 1.317157  |
| H | -4.282294 | -2.412946 | 1.420152  |



|    |           |           |           |
|----|-----------|-----------|-----------|
| H  | -5.260918 | -1.843834 | 3.680742  |
| H  | -5.645875 | -0.613404 | 2.460654  |
| H  | -4.367728 | -0.301962 | 3.673547  |
| H  | -3.323539 | -3.300616 | 3.543424  |
| H  | -2.242989 | -1.886748 | 3.681222  |
| H  | -2.011986 | -3.062318 | 2.368369  |
| H  | -2.371332 | -0.064108 | 1.910930  |
| H  | -1.282822 | -1.803941 | 0.707750  |
| H  | -0.067735 | -2.463180 | -0.697529 |
| H  | -2.399471 | 5.114587  | -2.431547 |
| H  | -4.651108 | 6.069226  | -1.901508 |
| H  | -6.308082 | 4.743244  | -0.590379 |
| H  | -5.756854 | 2.450797  | 0.213702  |
| H  | -3.468323 | -0.733268 | -2.204613 |
| H  | -4.606993 | -2.340555 | -3.694262 |
| H  | -4.534313 | -4.795315 | -3.204593 |
| H  | -3.291474 | -5.615507 | -1.189319 |
| H  | -2.155392 | -4.005616 | 0.316215  |
| H  | 2.602252  | -0.020373 | -1.997158 |
| H  | 4.904032  | -0.753836 | -2.575650 |
| H  | 5.543226  | -3.178201 | -2.430800 |
| H  | 3.836290  | -4.845057 | -1.642228 |
| H  | 1.558173  | -4.101556 | -1.013610 |
| C  | 0.940544  | 0.894683  | 2.222568  |
| C  | 2.289392  | 0.963729  | 1.625009  |
| C  | 0.643882  | -0.217435 | 3.276701  |
| F  | 1.560191  | -0.227759 | 4.280959  |
| F  | 0.652866  | -1.450145 | 2.692629  |
| F  | -0.573277 | -0.027315 | 3.834392  |
| O  | 0.017021  | 1.660531  | 1.940986  |
| C  | 3.319503  | 0.035981  | 1.906987  |
| C  | 4.563228  | 0.147674  | 1.281393  |
| C  | 4.778528  | 1.196007  | 0.374936  |
| Br | 6.456511  | 1.318530  | -0.520646 |
| C  | 3.778876  | 2.136850  | 0.084835  |
| C  | 2.536407  | 2.009584  | 0.705203  |
| H  | 3.158203  | -0.788494 | 2.604499  |
| H  | 5.354355  | -0.577963 | 1.484382  |
| H  | 3.968604  | 2.942896  | -0.628411 |
| H  | 1.731655  | 2.715292  | 0.484736  |

Statistical Thermodynamic Analysis  
Temperature= 298.150 Kelvin Pressure= 1.00000 Atm

SCF Energy= -4878.34580530 Predicted Change= -4.200142D-08  
Zero-point correction (ZPE)= -4877.7855 0.56025  
Internal Energy (U)= -4877.7445 0.60125  
Enthalpy (H)= -4877.7436 0.60220  
Gibbs Free Energy (G)= -4877.8637 0.48208

Frequencies -- 14.3572 19.8108 21.7110

183.15K thermal correction = 0.522695  
Single point SCF = -4881.375311

#### F: Product-catalyst complex (Re,Re)

Using Gaussian 09: AM64L-G09RevD.01 24-Apr-2013

# pbepbe/6-31G\*/auto gffprint gffinput  
scf=(direct,tight,maxcycle=300,xqc)  
opt=(maxcycle=250) freq=noraman iop(1/8=18)  
Temperature=298.15  
SCRF=(PCM,SOLVENT=Dichloromethane)

#N Geom=AllCheck Guess=TCheck SCRF=Check Test GenChk  
RPBEPBE/6-31G(d)/Auto  
Freq

Pointgroup= C1 Stoichiometry= C35H30BrF3N2O2S  
C1[X(C35H30BrF3N2O2S)] #Atoms= 74  
Charge= 0 Multiplicity= 1

SCF Energy= -4878.33998277 Predicted Change= -7.628162D-08

Optimization completed. {Found 1 times}  
Item Max Val. Criteria Pass? RMS Val. Criteria  
Pass?  
Force 0.00004 || 0.00045 [ YES ] 0.00000 || 0.00030 [ YES ]  
Displ 0.00499 || 0.00180 [ NO ] 0.00499 || 0.00180 [ YES ]

| Atomic Type | Coordinates (Angstroms) |           |           |
|-------------|-------------------------|-----------|-----------|
|             | X                       | Y         | Z         |
| N           | 3.550230                | -1.275449 | -0.244693 |
| C           | 2.887638                | -2.541433 | 0.101388  |
| C           | 1.426980                | -2.508201 | -0.357373 |
| C           | 0.660760                | -3.804860 | 0.023985  |
| C           | 1.467888                | -5.074660 | -0.313879 |
| C           | -0.707323               | -3.871045 | -0.679722 |
| C           | 0.764756                | -1.195064 | 0.166266  |
| C           | 0.571612                | -1.146189 | 1.683455  |
| N           | 1.537052                | -0.030803 | -0.331347 |
| C           | 0.830031                | 1.291490  | -0.790996 |
| C           | -0.391166               | 1.695999  | 0.131893  |
| C           | -0.363119               | 2.974009  | 0.934961  |
| O           | 1.681867                | 2.139589  | -1.189483 |
| C           | 2.852427                | -0.134605 | -0.511440 |
| S           | 3.884605                | 1.175975  | -1.094728 |
| C           | 5.305035                | 0.114823  | -0.881301 |
| C           | 4.940925                | -1.163546 | -0.421168 |
| C           | 6.647034                | 0.423555  | -1.131900 |
| C           | 7.615582                | -0.565959 | -0.905119 |
| C           | 7.244893                | -1.839484 | -0.436038 |
| C           | 5.902034                | -2.157210 | -0.185768 |
| C           | 1.596146                | -0.736494 | 2.560175  |
| C           | 1.390180                | -0.723539 | 3.947568  |
| C           | 0.154367                | -1.113961 | 4.483224  |
| C           | -0.878338               | -1.510991 | 3.620846  |
| C           | -0.671693               | -1.522968 | 2.233967  |
| C           | 0.208564                | 4.178230  | 0.469832  |
| C           | 0.207488                | 5.324684  | 1.276922  |
| C           | -0.364927               | 5.298239  | 2.558016  |
| C           | -0.926544               | 4.105738  | 3.037253  |
| C           | -0.916511               | 2.956855  | 2.234256  |
| H           | -0.622256               | 0.879874  | 0.834331  |
| H           | 2.967489                | -2.712900 | 1.191331  |
| H           | 3.437478                | -3.341556 | -0.416197 |
| H           | 0.492785                | -3.792163 | 1.118219  |
| H           | 0.853420                | -5.969993 | -0.118868 |
| H           | 2.383640                | -5.170720 | 0.293361  |
| H           | 1.756179                | -5.094463 | -1.381066 |
| H           | -1.244551               | -4.787585 | -0.381522 |
| H           | -0.580830               | -3.897922 | -1.777663 |
| H           | -1.359539               | -3.015089 | -0.440930 |
| H           | 1.426633                | -2.428863 | -1.462885 |
| H           | -0.217540               | -1.102856 | -0.325416 |
| H           | 6.933355                | 1.415563  | -1.495380 |
| H           | 8.669688                | -0.341177 | -1.093582 |
| H           | 8.012897                | -2.598238 | -0.258461 |
| H           | 5.623118                | -3.145404 | 0.190013  |

|    |           |           |           |
|----|-----------|-----------|-----------|
| H  | 2.559335  | -0.397364 | 2.165117  |
| H  | 2.198680  | -0.397009 | 4.609587  |
| H  | -0.006726 | -1.098317 | 5.565961  |
| H  | -1.852672 | -1.803862 | 4.025326  |
| H  | -1.493589 | -1.813404 | 1.569852  |
| H  | 0.671732  | 4.199204  | -0.517363 |
| H  | 0.659972  | 6.248432  | 0.899697  |
| H  | -0.366195 | 6.198938  | 3.181295  |
| H  | -1.365583 | 4.065389  | 4.039898  |
| H  | -1.338956 | 2.022281  | 2.623836  |
| C  | -1.287229 | 1.429698  | -1.126105 |
| C  | -1.761897 | 2.668430  | -1.922092 |
| F  | -2.627421 | 3.429372  | -1.190507 |
| F  | -2.417861 | 2.281928  | -3.054194 |
| F  | -0.743346 | 3.469458  | -2.316559 |
| C  | -2.492817 | 0.524746  | -0.892483 |
| O  | -0.224962 | 0.784515  | -1.844131 |
| C  | -2.684220 | -0.602554 | -1.710125 |
| C  | -3.788236 | -1.447035 | -1.524439 |
| C  | -4.706429 | -1.146449 | -0.510885 |
| Br | -6.216582 | -2.295366 | -0.243082 |
| C  | -4.543923 | -0.025190 | 0.313481  |
| C  | -3.436109 | 0.809592  | 0.113225  |
| H  | -1.952256 | -0.821400 | -2.493050 |
| H  | -3.932205 | -2.324387 | -2.160580 |
| H  | -5.270292 | 0.193496  | 1.100719  |
| H  | -3.308224 | 1.689901  | 0.751199  |

#### Statistical Thermodynamic Analysis

Temperature= 298.150 Kelvin Pressure= 1.00000 Atm

```

=====
SCF Energy= -4878.33998277 Predicted Change= -
7.628162D-08
Zero-point correction (ZPE)= -4877.7774 0.56258
Internal Energy (U)= -4877.7382 0.60177
Enthalpy (H)= -4877.7372
0.60271
Gibbs Free Energy (G)= -4877.8515
0.48847
=====

```

Frequencies -- 10.0984 18.6472 27.7774

183.15K thermal correction = 0.526955

Single point SCF = -4881.365776

#### F: Product-catalyst complex (Si,Re)

Using Gaussian 09: AM64L-G09RevD.01 24-Apr-2013

```

=====
# pbepbe/6-31G*/auto gffprint gffinput
scf=(direct,tight,maxcycle=300,xqc)
opt=(maxcycle=250) freq=noraman iop(1/8=18)
Temperature=298.15
SCRF=(PCM,SOLVENT=Dichloromethane)
#N Geom=AllCheck Guess=TCheck SCRF=Check Test GenChk
RPBEPBE/6-31G(d)/Auto
Freq
=====
Pointgroup= C1 Stoichiometry= C35H30BrF3N2O2S
C1[X(C35H30BrF3N2O2S)] #Atoms= 74
Charge = 0 Multiplicity = 1
=====

```

SCF Energy= -4878.34073625 Predicted Change= -1.090354D-08

Optimization completed. {Found 2 times}

| Item  | Max Val. | Criteria | Pass?   | RMS Val. | Criteria        |
|-------|----------|----------|---------|----------|-----------------|
| Force | 0.00002  | 0.00045  | [ YES ] | 0.00000  | 0.00030 [ YES ] |
| Displ | 0.00120  | 0.00180  | [ YES ] | 0.00120  | 0.00180 [ YES ] |

| Atomic Type | Coordinates (Angstroms) |           |           |
|-------------|-------------------------|-----------|-----------|
|             | X                       | Y         | Z         |
| N           | -3.744492               | 0.961484  | -0.271830 |
| C           | -4.414822               | -0.192925 | 0.348477  |
| C           | -3.408492               | -1.030003 | 1.145702  |
| C           | -4.041785               | -2.322445 | 1.729339  |
| C           | -5.407106               | -2.052963 | 2.391418  |
| C           | -3.100915               | -2.985133 | 2.753467  |
| C           | -2.147611               | -1.288005 | 0.265727  |
| C           | -2.371656               | -2.214648 | -0.931377 |
| N           | -1.577678               | 0.015212  | -0.143115 |
| C           | -0.031253               | 0.272549  | -0.205892 |
| C           | 0.674406                | 0.091114  | 1.211646  |
| C           | 1.262455                | 1.274515  | 1.926618  |
| O           | 0.228174                | 1.260590  | -0.958411 |
| C           | -2.392851               | 1.020160  | -0.448135 |
| S           | -1.857536               | 2.559874  | -1.129104 |
| C           | -3.552420               | 3.115817  | -1.137584 |
| C           | -4.432107               | 2.123780  | -0.665048 |
| C           | -4.042046               | 4.356708  | -1.560967 |
| C           | -5.425758               | 4.583550  | -1.508481 |
| C           | -6.300051               | 3.585420  | -1.041699 |
| C           | -5.816459               | 2.340288  | -0.614179 |
| C           | -2.977337               | -1.782775 | -2.128556 |
| C           | -3.199508               | -2.679291 | -3.184294 |
| C           | -2.817413               | -4.023015 | -3.064090 |
| C           | -2.196448               | -4.460533 | -1.885059 |
| C           | -1.970623               | -3.562271 | -0.833036 |
| C           | 1.953384                | 2.304690  | 1.250902  |
| C           | 2.474681                | 3.395873  | 1.960397  |
| C           | 2.327047                | 3.476806  | 3.353828  |
| C           | 1.645035                | 2.458913  | 4.037716  |
| C           | 1.116761                | 1.372330  | 3.327050  |
| C           | 1.529219                | -0.995267 | 0.469493  |
| C           | 2.924565                | -0.591523 | -0.007116 |
| C           | 1.614543                | -2.344185 | 1.215808  |
| F           | 2.309343                | -2.227473 | 2.383511  |
| F           | 2.220647                | -3.296121 | 0.464449  |
| F           | 0.381487                | -2.838597 | 1.555855  |
| O           | 0.580349                | -1.093391 | -0.608023 |
| C           | 3.167090                | -0.487349 | -1.387148 |
| C           | 4.432486                | -0.132600 | -1.873608 |
| C           | 5.461315                | 0.119945  | -0.959038 |
| Br          | 7.198245                | 0.608074  | -1.609152 |
| C           | 5.248529                | 0.029053  | 0.421798  |
| C           | 3.977212                | -0.326449 | 0.891721  |
| H           | -0.001244               | -0.438864 | 1.905196  |
| H           | -4.902815               | -0.793403 | -0.442288 |
| H           | -5.197417               | 0.208449  | 1.009844  |
| H           | -4.202384               | -3.028805 | 0.892239  |
| H           | -5.781915               | -2.975934 | 2.865612  |
| H           | -6.172895               | -1.725219 | 1.668187  |
| H           | -5.324831               | -1.282930 | 3.180541  |
| H           | -3.551936               | -3.915391 | 3.138970  |
| H           | -2.929479               | -2.313741 | 3.614957  |
| H           | -2.116414               | -3.247151 | 2.332339  |
| H           | -3.063450               | -0.410085 | 1.998001  |
| H           | -1.379726               | -1.748967 | 0.897643  |
| H           | -3.360481               | 5.131254  | -1.926199 |
| H           | -5.826078               | 5.547178  | -1.837528 |
| H           | -7.376876               | 3.776508  | -1.011455 |
| H           | -6.503004               | 1.566701  | -0.260178 |

|   |           |           |           |
|---|-----------|-----------|-----------|
| H | -3.259982 | -0.733676 | -2.262797 |
| H | -3.667167 | -2.320132 | -4.106895 |
| H | -2.989506 | -4.721253 | -3.889683 |
| H | -1.872504 | -5.501824 | -1.786417 |
| H | -1.451307 | -3.905939 | 0.067379  |
| H | 2.049397  | 2.249216  | 0.164440  |
| H | 3.002687  | 4.188724  | 1.419337  |
| H | 2.740057  | 4.329272  | 3.903873  |
| H | 1.521131  | 2.511348  | 5.124735  |
| H | 0.581823  | 0.580927  | 3.866312  |
| H | 2.341546  | -0.676296 | -2.077429 |
| H | 4.613867  | -0.053289 | -2.948943 |
| H | 6.060913  | 0.237576  | 1.123041  |
| H | 3.813310  | -0.390364 | 1.970094  |

-----  
Statistical Thermodynamic Analysis  
Temperature= 298.150 Kelvin Pressure= 1.00000 Atm  
=====

SCF Energy= -4878.34073625 Predicted Change= -  
1.090354D-08  
Zero-point correction (ZPE)= -4877.7779 0.56277  
Internal Energy (U)= -4877.7387 0.60195  
Enthalpy (H)= -4877.7378  
0.60289  
Gibbs Free Energy (G)= -4877.8524  
0.48833

-----  
Frequencies -- 12.7730 18.4261 22.6933

183.15K thermal correction = 0.526942  
Single point SCF = -4881.365054

**F: Product-catalyst complex (Si,Si)**

-----  
Using Gaussian 09: AM64L-G09RevD.01 24-Apr-2013  
=====

# pbepbe/6-31G\*/auto gfprint gfinput  
scf=(direct,tight,maxcycle=300,xqc)  
opt=(maxcycle=250) freq=noraman iop(1/8=18)  
Temperature=298.15  
SCRF=(PCM,SOLVENT=Dichloromethane)  
#N Geom=AllCheck Guess=TCheck SCRF=Check Test GenChk  
RPBEPBE/6-31G(d)/Auto  
Freq

-----  
Pointgroup= C1 Stoichiometry= C35H30BrF3N2O2S  
C1[X(C35H30BrF3N2O2S)] #Atoms= 74  
Charge = 0 Multiplicity = 1

-----  
SCF Energy= -4878.33758727 Predicted Change= -8.545895D-  
09  
=====

Optimization completed. {Found 2 times}  
Item Max Val. Criteria Pass? RMS Val. Criteria  
Pass?  
Force 0.00001 || 0.00045 [ YES ] 0.00000 || 0.00030 [ YES ]  
Displ 0.00080 || 0.00180 [ YES ] 0.00080 || 0.00180 [ YES ]

-----  
Atomic Coordinates (Angstroms)  
Type X Y Z

|   |           |           |          |
|---|-----------|-----------|----------|
| N | -3.404563 | -1.145707 | 0.495265 |
| C | -2.675983 | -2.227174 | 1.180160 |
| C | -1.217924 | -1.816127 | 1.410021 |

|    |           |           |           |
|----|-----------|-----------|-----------|
| C  | -0.377658 | -2.938338 | 2.077769  |
| C  | -1.095254 | -3.542973 | 3.301037  |
| C  | 1.005361  | -2.412990 | 2.508454  |
| C  | -0.645315 | -1.271742 | 0.062207  |
| C  | -0.551910 | -2.314492 | -1.056703 |
| N  | -1.449896 | -0.097046 | -0.332284 |
| C  | -0.804917 | 1.238409  | -0.902941 |
| C  | 0.233115  | 1.846064  | 0.139311  |
| H  | 0.408910  | 1.128445  | 0.959505  |
| C  | 0.012820  | 3.201842  | 0.763943  |
| O  | -1.685468 | 1.930209  | -1.492517 |
| C  | -2.766315 | -0.128555 | -0.152072 |
| S  | -3.879444 | 1.112726  | -0.739480 |
| C  | -5.238156 | 0.180893  | -0.055232 |
| C  | -4.802722 | -1.010459 | 0.554938  |
| C  | -6.598627 | 0.507959  | -0.084488 |
| C  | -7.513511 | -0.380954 | 0.500374  |
| C  | -7.072282 | -1.573059 | 1.102691  |
| C  | -5.710339 | -1.905984 | 1.138191  |
| C  | 0.580395  | -3.154188 | -1.113192 |
| C  | 0.694394  | -4.149416 | -2.093489 |
| C  | -0.322143 | -4.320574 | -3.044602 |
| C  | -1.445576 | -3.483196 | -3.008511 |
| C  | -1.558500 | -2.487903 | -2.025608 |
| C  | 0.448347  | 3.411625  | 2.090723  |
| C  | 0.275429  | 4.648378  | 2.727123  |
| C  | -0.356805 | 5.700978  | 2.048839  |
| C  | -0.813377 | 5.500507  | 0.737166  |
| C  | -0.629260 | 4.267118  | 0.096307  |
| H  | -2.745880 | -3.150198 | 0.574506  |
| H  | -3.187883 | -2.400574 | 2.138646  |
| H  | -0.233071 | -3.748843 | 1.337622  |
| H  | -0.432339 | -4.268257 | 3.802734  |
| H  | -2.018906 | -4.080835 | 3.028536  |
| H  | -1.354915 | -2.762307 | 4.039779  |
| H  | 1.596715  | -3.226660 | 2.961839  |
| H  | 0.901277  | -1.613320 | 3.264763  |
| H  | 1.597755  | -2.004685 | 1.671758  |
| H  | -1.221378 | -0.952747 | 2.105818  |
| H  | 0.370222  | -0.888486 | 0.245831  |
| H  | -6.940596 | 1.434994  | -0.555223 |
| H  | -8.581180 | -0.142360 | 0.483859  |
| H  | -7.799028 | -2.257487 | 1.550411  |
| H  | -5.374878 | -2.838028 | 1.600968  |
| H  | 1.393242  | -3.017558 | -0.392644 |
| H  | 1.586070  | -4.784548 | -2.118230 |
| H  | -0.233843 | -5.093477 | -3.814974 |
| H  | -2.239697 | -3.594937 | -3.753999 |
| H  | -2.434011 | -1.831866 | -2.039097 |
| H  | 0.928868  | 2.588202  | 2.633606  |
| H  | 0.627297  | 4.785773  | 3.755213  |
| H  | -0.499045 | 6.668674  | 2.541772  |
| H  | -1.319693 | 6.313133  | 0.204640  |
| H  | -1.002620 | 4.106264  | -0.915932 |
| C  | 1.314597  | 1.525481  | -0.948338 |
| C  | 1.817706  | 2.718660  | -1.793572 |
| F  | 2.641220  | 2.282113  | -2.788584 |
| F  | 2.529672  | 3.599184  | -1.031842 |
| F  | 0.814751  | 3.407398  | -2.388517 |
| C  | 2.524619  | 0.729605  | -0.472275 |
| O  | 0.395278  | 0.743210  | -1.733498 |
| C  | 3.309125  | 1.168361  | 0.611587  |
| C  | 4.423944  | 0.431324  | 1.033453  |
| C  | 4.754579  | -0.748417 | 0.353978  |
| Br | 6.274445  | -1.764311 | 0.926459  |
| C  | 3.997197  | -1.201175 | -0.733258 |
| C  | 2.884904  | -0.452136 | -1.143092 |
| H  | 3.052122  | 2.094018  | 1.136353  |
| H  | 5.026819  | 0.770796  | 1.879740  |
| H  | 4.271623  | -2.121572 | -1.255834 |

H 2.275777 -0.794721 -1.984002

---

Statistical Thermodynamic Analysis  
 Temperature= 298.150 Kelvin Pressure= 1.00000 Atm

---

SCF Energy= -4878.33758727 Predicted Change= -  
 8.545895D-09  
 Zero-point correction (ZPE)= -4877.7750 0.56250  
 Internal Energy (U)= -4877.7359 0.60168  
 Enthalpy (H)= -4877.7349  
 0.60263  
 Gibbs Free Energy (G)= -4877.8491  
 0.48842

---

Frequencies -- 11.6007 15.8217 24.6120

183.15K thermal correction = 0.526891  
 Single point SCF = -4881.363540

**TS-G: Catalyst release (Re,Re)**

---

Using Gaussian 09: AM64L-G09RevD.01 24-Apr-2013

---

# pbepbe/6-31G(d)/auto scf=(maxcycle=300,direct,tight,xqc)  
 density=current  
 opt=(maxcycle=250,modredundant)  
 SCRF=(PCM,SOLVENT=Dichloromethane)  
 iop(1/8=18) Temperature=298.15  
 Modredundant Input: B 9 10 F  
 Modredundant Input:  
 # pbepbe/6-31G(d)/auto scf=(direct,tight,maxcycle=300,xqc)  
 opt=(nofreeze,maxcycle=250,ts,calcfc,noeigentest) iop(1/8=18)  
 freq=noraman  
 SCRF=(PCM,SOLVENT=Dichloromethane)  
 Temperature=298.15 geom=check  
 guess=read  
 #N Geom=AllCheck Guess=TCheck SCRF=Check Test GenChk  
 RPBEPBE/6-31G(d)/Auto  
 Freq

---

Pointgroup= C1 Stoichiometry= C35H30BrF3N2O2S  
 C1[X(C35H30BrF3N2O2S)] #Atoms= 74  
 Charge= 0 Multiplicity= 1

SCF Energy= -4878.33760722 Predicted Change= -2.033138D-  
 09

---

Optimization completed. {Found 3 times}  
 Item Max Val. Criteria Pass? RMS Val. Criteria  
 Pass?  
 Force 0.00000 || 0.00045 [ YES ] 0.00000 || 0.00030 [ YES ]  
 Displ 0.00111 || 0.00180 [ YES ] 0.00111 || 0.00180 [ YES ]

---

| Atomic Type | Coordinates (Angstroms) |           |           |
|-------------|-------------------------|-----------|-----------|
|             | X                       | Y         | Z         |
| N           | -3.523270               | -1.381010 | 0.194579  |
| C           | -2.842183               | -2.683119 | 0.159327  |
| C           | -1.497875               | -2.585409 | 0.890887  |
| C           | -0.702204               | -3.918916 | 0.864954  |
| C           | -1.589908               | -5.134233 | 1.201213  |
| C           | 0.487309                | -3.871961 | 1.842209  |
| C           | -0.717287               | -1.348941 | 0.334273  |
| C           | -0.252578               | -1.503250 | -1.118360 |

|    |           |           |           |
|----|-----------|-----------|-----------|
| N  | -1.525901 | -0.133979 | 0.525538  |
| C  | -0.783785 | 1.485615  | 1.086705  |
| C  | 0.245870  | 1.883040  | -0.022395 |
| C  | 0.107834  | 3.170857  | -0.796107 |
| O  | -1.716565 | 2.145498  | 1.560764  |
| C  | -2.830259 | -0.219314 | 0.448399  |
| S  | -3.941823 | 1.168171  | 0.611362  |
| C  | -5.312779 | 0.112175  | 0.215909  |
| C  | -4.906617 | -1.225896 | 0.036016  |
| C  | -6.660183 | 0.471038  | 0.106791  |
| C  | -7.597793 | -0.528735 | -0.198557 |
| C  | -7.189133 | -1.860583 | -0.384785 |
| C  | -5.839251 | -2.227288 | -0.271267 |
| C  | -1.062961 | -1.133475 | -2.211484 |
| C  | -0.616282 | -1.309122 | -3.529946 |
| C  | 0.652161  | -1.852257 | -3.781411 |
| C  | 1.474358  | -2.211685 | -2.703154 |
| C  | 1.026214  | -2.034896 | -1.386552 |
| C  | -0.491222 | 4.331254  | -0.262006 |
| C  | -0.605501 | 5.493658  | -1.037287 |
| C  | -0.124362 | 5.523455  | -2.355117 |
| C  | 0.459801  | 4.371913  | -2.903106 |
| C  | 0.564205  | 3.206683  | -2.131587 |
| H  | 0.348232  | 1.056310  | -0.742721 |
| H  | -2.708461 | -3.003230 | -0.891796 |
| H  | -3.503860 | -3.407202 | 0.658802  |
| H  | -0.308451 | -4.062273 | -0.159870 |
| H  | -0.970984 | -6.045851 | 1.261275  |
| H  | -2.365262 | -5.317202 | 0.438231  |
| H  | -2.091042 | -5.007010 | 2.178648  |
| H  | 1.054969  | -4.817227 | 1.798559  |
| H  | 0.134126  | -3.739424 | 2.881271  |
| H  | 1.192504  | -3.053205 | 1.621560  |
| H  | -1.717088 | -2.348563 | 1.951478  |
| H  | 0.173496  | -1.196568 | 0.966810  |
| H  | -6.975503 | 1.508699  | 0.253075  |
| H  | -8.655020 | -0.263492 | -0.292962 |
| H  | -7.930301 | -2.628792 | -0.625185 |
| H  | -5.527731 | -3.263950 | -0.426080 |
| H  | -2.044777 | -0.680662 | -2.040356 |
| H  | -1.262350 | -1.011412 | -4.362425 |
| H  | 1.002052  | -1.983480 | -4.810581 |
| H  | 2.475320  | -2.618468 | -2.881752 |
| H  | 1.690350  | -2.295464 | -0.555557 |
| H  | -0.885782 | 4.309367  | 0.755250  |
| H  | -1.077910 | 6.383381  | -0.607094 |
| H  | -0.213779 | 6.435480  | -2.954795 |
| H  | 0.825185  | 4.375433  | -3.935495 |
| H  | 0.998701  | 2.302256  | -2.574755 |
| C  | 1.314381  | 1.610011  | 1.098217  |
| C  | 1.878472  | 2.858086  | 1.814229  |
| F  | 2.658649  | 3.591457  | 0.972600  |
| F  | 2.648310  | 2.492292  | 2.876284  |
| F  | 0.905253  | 3.670932  | 2.294148  |
| C  | 2.465126  | 0.684615  | 0.742696  |
| O  | 0.321825  | 0.996285  | 1.960543  |
| C  | 2.806939  | -0.377296 | 1.599375  |
| C  | 3.867465  | -1.238730 | 1.283877  |
| C  | 4.591720  | -1.018035 | 0.105101  |
| Br | 6.023255  | -2.204922 | -0.350809 |
| C  | 4.286642  | 0.047470  | -0.751245 |
| C  | 3.223975  | 0.898893  | -0.422047 |
| H  | 2.231668  | -0.535660 | 2.516455  |
| H  | 4.126969  | -2.067789 | 1.947537  |
| H  | 4.865881  | 0.208338  | -1.664146 |
| H  | 2.984423  | 1.734016  | -1.088029 |

---

Statistical Thermodynamic Analysis  
 Temperature= 298.150 Kelvin Pressure= 1.00000 Atm

```

=====
SCF Energy= -4878.33760722 Predicted Change= -
2.033138D-09
Zero-point correction (ZPE)= -4877.7764 0.56119
Internal Energy (U)= -4877.7373 0.60023
Enthalpy (H)= -4877.7364
0.60117
Gibbs Free Energy (G)= -4877.8509
0.48664
=====

```

```

-----
Frequencies -- -133.4370 9.5947 18.0182
-----
183.15K thermal correction = 0.525275
Single point SCF = -4881.362327

```

### TS-G: Catalyst release (Si,Re)

```

-----
Using Gaussian 09: AM64L-G09RevD.01 24-Apr-2013
=====

```

```

=====
# pbepbe/6-31G(d)/auto gfpint gfinput
scf=(direct,tight,maxcycle=300,xqc)
opt=(maxcycle=250,calcfc,ts,noeigentest) freq=noraman
SCRF=(PCM,SOLVENT=Dichloromethane) iop(1/8=18)
Temperature=298.15
#N Geom=AllCheck Guess=TChech SCRF=Check Test GenChk
RPBEPBE/6-31G(d)/Auto
Freq
-----

```

```

Pointgroup= C1 Stoichiometry= C35H30BrF3N2O2S
C1[X(C35H30BrF3N2O2S)] #Atoms= 74
Charge = 0 Multiplicity = 1
-----

```

```

SCF Energy= -4878.33782991 Predicted Change= -2.311936D-
09
=====

```

Optimization completed on the basis of negligible forces.

```

{Found 2 times}
Item Max Val. Criteria Pass? RMS Val. Criteria
Pass?
Force 0.00000 || 0.00045 [ YES ] 0.00000 || 0.00030 [
YES ]
Displ 0.00182 || 0.00180 [ NO ] 0.00182 || 0.00180 [
YES ]
-----

```

| Atomic Coordinates (Angstroms) |           |           |           |
|--------------------------------|-----------|-----------|-----------|
| Type                           | X         | Y         | Z         |
| C                              | -6.523121 | 3.302003  | -0.334680 |
| H                              | -7.590146 | 3.471676  | -0.162084 |
| C                              | -5.977836 | 2.042049  | -0.044416 |
| H                              | -6.607907 | 1.236362  | 0.341966  |
| C                              | -4.608304 | 1.845813  | -0.272365 |
| C                              | -3.805962 | 2.885688  | -0.790328 |
| C                              | -4.354445 | 4.138734  | -1.079944 |
| H                              | -3.730609 | 4.942618  | -1.481946 |
| C                              | -5.724082 | 4.339829  | -0.844098 |
| H                              | -6.169219 | 5.314666  | -1.063858 |
| N                              | -3.872041 | 0.677034  | -0.035421 |
| C                              | -2.540334 | 0.758732  | -0.364092 |
| S                              | -2.133310 | 2.351226  | -1.043733 |
| C                              | -4.429575 | -0.538639 | 0.577399  |
| H                              | -4.984056 | -1.109722 | -0.192037 |
| H                              | -5.145222 | -0.217205 | 1.349515  |
| C                              | -3.311996 | -1.385892 | 1.204721  |
| C                              | -3.838495 | -2.731472 | 1.773728  |
| H                              | -4.082121 | -3.388595 | 0.916199  |

|    |           |           |           |
|----|-----------|-----------|-----------|
| C  | -5.119776 | -2.550518 | 2.611612  |
| H  | -5.975206 | -2.197340 | 2.011184  |
| H  | -4.959055 | -1.833174 | 3.437749  |
| H  | -5.413999 | -3.514420 | 3.061164  |
| C  | -2.765464 | -3.428712 | 2.631230  |
| H  | -1.838143 | -3.639622 | 2.074214  |
| H  | -3.149051 | -4.390405 | 3.012755  |
| H  | -2.493842 | -2.804943 | 3.502591  |
| H  | -2.893177 | -0.805526 | 2.051556  |
| C  | -2.138117 | -1.540898 | 0.184064  |
| C  | -2.454171 | -2.410124 | -1.035952 |
| H  | -1.288367 | -2.002661 | 0.703614  |
| N  | -1.667461 | -0.202296 | -0.205374 |
| C  | 0.062360  | 0.185599  | -0.613968 |
| C  | 0.692900  | 0.799923  | 0.695270  |
| H  | -0.032116 | 0.767625  | 1.523073  |
| C  | 1.344152  | 2.153560  | 0.648811  |
| O  | 0.083145  | 0.666178  | -1.753955 |
| C  | -3.150575 | -1.924030 | -2.160748 |
| H  | -3.454696 | -0.873614 | -2.212045 |
| C  | -3.440087 | -2.765408 | -3.254012 |
| H  | -3.978823 | -2.364670 | -4.110031 |
| C  | -3.033236 | -4.107549 | -3.228392 |
| H  | -3.255937 | -4.761884 | -4.077582 |
| C  | -2.324974 | -4.599979 | -2.122552 |
| H  | -1.985596 | -5.640926 | -2.103994 |
| C  | -2.034314 | -3.755651 | -1.041736 |
| H  | -1.462250 | -4.145073 | -0.191990 |
| C  | 2.075380  | 2.600777  | -0.472784 |
| H  | 2.157790  | 1.952655  | -1.348813 |
| C  | 2.669475  | 3.870264  | -0.475220 |
| H  | 3.230321  | 4.202415  | -1.355452 |
| C  | 2.550319  | 4.713323  | 0.640693  |
| H  | 3.018365  | 5.703500  | 0.635756  |
| C  | 1.824709  | 4.281392  | 1.761224  |
| H  | 1.721228  | 4.932058  | 2.636097  |
| C  | 1.224769  | 3.014360  | 1.760044  |
| H  | 0.654755  | 2.682201  | 2.636183  |
| C  | 3.422411  | -1.135758 | -0.851522 |
| H  | 2.683898  | -1.671537 | -1.453352 |
| C  | 2.997353  | -0.465537 | 0.308509  |
| C  | 1.529131  | -0.532256 | 0.712614  |
| C  | 1.380462  | -1.323844 | 2.029424  |
| F  | 0.074227  | -1.461088 | 2.409899  |
| F  | 2.015264  | -0.694807 | 3.058463  |
| F  | 1.896080  | -2.573101 | 1.920408  |
| C  | 3.945093  | 0.242047  | 1.074774  |
| H  | 3.636063  | 0.781615  | 1.973306  |
| C  | 5.292337  | 0.275088  | 0.694236  |
| H  | 6.023010  | 0.829149  | 1.289091  |
| C  | 5.688929  | -0.407015 | -0.462793 |
| Br | 7.531795  | -0.367698 | -0.986531 |
| C  | 4.767558  | -1.112461 | -1.244953 |
| H  | 5.091979  | -1.636730 | -2.147739 |
| O  | 0.709830  | -1.132619 | -0.318158 |

### Statistical Thermodynamic Analysis

Temperature= 298.150 Kelvin Pressure= 1.00000 Atm

```

=====
SCF Energy= -4878.33782991 Predicted Change= -
2.311936D-09
Zero-point correction (ZPE)= -4877.7764 0.56137
Internal Energy (U)= -4877.7373 0.60045
Enthalpy (H)= -4877.7364
0.60139
Gibbs Free Energy (G)= -4877.8520
0.48577
-----

```

```

Frequencies -- -86.7448 10.0600 15.7465

```

183.15K thermal correction = 0.524831  
 Single point SCF = -4881.362843

**TS-G: Catalyst release (Si,Si)**

-----  
 Using Gaussian 09: AM64L-G09RevD.01 24-Apr-2013  
 =====  
 # pbepbe/6-31G(d)/auto ginput  
 scf=(direct,tight,maxcycle=300,xqc)  
 opt=(maxcycle=250,calcf,ts,noeigentest) freq=noraman  
 SCRF=(PCM,SOLVENT=Dichloromethane) iop(1/8=18)  
 Temperature=298.15  
 #N Geom=AllCheck Guess=TCheck SCRF=Check Test GenChk  
 RPBEPBE/6-31G(d)/Auto  
 Freq  
 -----  
 Pointgroup= C1 Stoichiometry= C35H30BrF3N2O2S  
 C1[X(C35H30BrF3N2O2S)] #Atoms= 74  
 Charge = 0 Multiplicity = 1  
 -----

SCF Energy= -4878.33608681 Predicted Change= -9.422267D-10  
 =====

Optimization completed on the basis of negligible forces.  
 {Found 2 times}  
 Item Max Val. Criteria Pass? RMS Val. Criteria  
 Pass?  
 Force 0.00000 || 0.00045 [ YES ] 0.00000 || 0.00030 [ YES ]  
 Displ 0.00229 || 0.00180 [ NO ] 0.00229 || 0.00180 [ YES ]  
 -----

| Atomic Type | Coordinates (Angstroms) |           |           |
|-------------|-------------------------|-----------|-----------|
|             | X                       | Y         | Z         |
| N           | 3.294944                | -1.280151 | -0.546266 |
| C           | 2.535884                | -2.450095 | -1.013223 |
| C           | 1.049266                | -2.093065 | -1.145861 |
| C           | 0.179403                | -3.294521 | -1.603754 |
| C           | 0.814809                | -4.061285 | -2.780914 |
| C           | -1.233754               | -2.830319 | -2.005425 |
| C           | 0.579822                | -1.409487 | 0.182601  |
| C           | 0.556825                | -2.342170 | 1.398083  |
| N           | 1.403197                | -0.217101 | 0.425859  |
| C           | 0.734409                | 1.355798  | 1.126899  |
| C           | -0.143675               | 1.961619  | -0.026061 |
| H           | -0.211814               | 1.244762  | -0.860551 |
| C           | 0.142777                | 3.328106  | -0.599795 |
| O           | 1.661587                | 1.878072  | 1.760584  |
| C           | 2.670259                | -0.237332 | 0.096190  |
| S           | 3.810215                | 1.094672  | 0.429782  |
| C           | 5.108481                | 0.173594  | -0.357859 |
| C           | 4.659470                | -1.086643 | -0.803229 |
| C           | 6.440339                | 0.561744  | -0.535083 |
| C           | 7.321219                | -0.332699 | -1.164469 |
| C           | 6.872634                | -1.590943 | -1.601194 |
| C           | 5.537531                | -1.985896 | -1.425042 |
| C           | -0.603446               | -3.095971 | 1.672862  |
| C           | -0.646631               | -3.990255 | 2.751716  |
| C           | 0.471721                | -4.144474 | 3.584156  |
| C           | 1.626597                | -3.391057 | 3.330827  |
| C           | 1.667274                | -2.496475 | 2.250553  |
| C           | -0.219998               | 3.589991  | -1.938418 |
| C           | 0.018087                | 4.840786  | -2.523758 |
| C           | 0.645432                | 5.852219  | -1.781171 |
| C           | 1.033628                | 5.597001  | -0.457249 |

|    |           |           |           |
|----|-----------|-----------|-----------|
| C  | 0.785038  | 4.349273  | 0.131804  |
| H  | 2.688324  | -3.291698 | -0.310842 |
| H  | 2.952630  | -2.736491 | -1.990672 |
| H  | 0.091074  | -3.996719 | -0.752577 |
| H  | 0.127260  | -4.851169 | -3.128894 |
| H  | 1.762715  | -4.553533 | -2.505131 |
| H  | 1.010755  | -3.389921 | -3.637502 |
| H  | -1.850193 | -3.695412 | -2.304294 |
| H  | -1.185840 | -2.139499 | -2.867349 |
| H  | -1.768098 | -2.310751 | -1.192371 |
| H  | 0.970469  | -1.310549 | -1.928062 |
| H  | -0.447443 | -1.036767 | 0.031609  |
| H  | 6.787661  | 1.540314  | -0.189673 |
| H  | 8.366413  | -0.044392 | -1.310795 |
| H  | 7.571707  | -2.280455 | -2.084008 |
| H  | 5.198739  | -2.970760 | -1.757961 |
| H  | -1.490443 | -2.974262 | 1.041682  |
| H  | -1.561067 | -4.560796 | 2.945485  |
| H  | 0.439217  | -4.838698 | 4.430179  |
| H  | 2.501911  | -3.490173 | 3.981281  |
| H  | 2.570909  | -1.899452 | 2.093224  |
| H  | -0.691878 | 2.797218  | -2.531941 |
| H  | -0.277786 | 5.020618  | -3.562720 |
| H  | 0.839105  | 6.830164  | -2.234429 |
| H  | 1.537836  | 6.375901  | 0.124953  |
| H  | 1.107229  | 4.150016  | 1.155480  |
| C  | -1.342777 | 1.628689  | 0.934779  |
| C  | -1.927824 | 2.825234  | 1.718330  |
| F  | -2.825375 | 2.396136  | 2.647634  |
| F  | -2.577315 | 3.682413  | 0.882324  |
| F  | -0.978244 | 3.529891  | 2.380153  |
| C  | -2.488013 | 0.810829  | 0.360577  |
| O  | -0.483742 | 0.869128  | 1.822532  |
| C  | -3.125100 | 1.192355  | -0.834482 |
| C  | -4.189723 | 0.440257  | -1.349219 |
| C  | -4.620834 | -0.693312 | -0.648257 |
| Br | -6.064133 | -1.736154 | -1.350849 |
| C  | -4.015416 | -1.083545 | 0.553197  |
| C  | -2.950618 | -0.321819 | 1.054434  |
| H  | -2.791941 | 2.085247  | -1.372780 |
| H  | -4.676389 | 0.732279  | -2.283356 |
| H  | -4.370397 | -1.966676 | 1.091055  |
| H  | -2.459377 | -0.617315 | 1.985853  |

-----  
 Statistical Thermodynamic Analysis  
 Temperature= 298.150 Kelvin Pressure= 1.00000 Atm  
 =====

SCF Energy= -4878.33608681 Predicted Change= -9.422267D-10  
 Zero-point correction (ZPE)= -4877.7750 0.56100  
 Internal Energy (U)= -4877.7359 0.60011  
 Enthalpy (H)= -4877.7350  
 0.60106  
 Gibbs Free Energy (G)= -4877.8504  
 0.48560  
 -----

Frequencies -- -125.7535 9.5595 13.3613

183.15K thermal correction = 0.524588  
 Single point SCF = -4881.361088

**H: Minor Product**

-----  
 Using Gaussian 09: AM64L-G09RevD.01 24-Apr-2013  
 =====  
 # pbepbe/6-31G\*/auto ginput  
 scf=(direct,tight,maxcycle=300,xqc)

opt=(maxcycle=250) freq=noraman iop(1/8=18)  
 Temperature=298.15  
 SCRF=(PCM,SOLVENT=Dichloromethane)  
 #N Geom=AllCheck Guess=TCheck SCRF=Check Test GenChk  
 RPBEPBE/6-31G(d)/Auto  
 Freq

Pointgroup= C1 Stoichiometry= C16H10BrF3O2  
 C1[X(C16H10BrF3O2)] #Atoms= 32  
 Charge = 0 Multiplicity = 1

SCF Energy= -3635.82253447 Predicted Change= -1.220381D-08

Optimization completed. {Found 1 times}  
 Item Max Val. Criteria Pass? RMS Val. Criteria  
 Pass?  
 Force 0.00003 || 0.00045 [ YES ] 0.00000 || 0.00030 [ YES ]  
 Displ 0.00193 || 0.00180 [ NO ] 0.00193 || 0.00180 [ YES ]

| Atomic Type | Coordinates (Angstroms) |           |           |
|-------------|-------------------------|-----------|-----------|
|             | X                       | Y         | Z         |
| C           | -1.968733               | -1.663843 | -1.467707 |
| C           | -1.719156               | -0.220710 | -1.025610 |
| C           | -2.858459               | 0.697176  | -0.656764 |
| O           | -2.679403               | -2.264197 | -2.233913 |
| C           | -4.144394               | 0.204716  | -0.362203 |
| C           | -5.180415               | 1.086730  | -0.025812 |
| C           | -4.944458               | 2.468487  | 0.025823  |
| C           | -3.667814               | 2.968212  | -0.273541 |
| C           | -2.634627               | 2.088217  | -0.620636 |
| H           | -1.079705               | 0.266622  | -1.783796 |
| H           | -4.341555               | -0.870377 | -0.408465 |
| H           | -6.176788               | 0.690338  | 0.194731  |
| H           | -5.755346               | 3.155017  | 0.289867  |
| H           | -3.477146               | 4.045879  | -0.247125 |
| H           | -1.643619               | 2.484302  | -0.871529 |
| C           | -0.751400               | -0.911022 | 0.015532  |
| C           | -1.289723               | -1.000757 | 1.457626  |
| F           | -1.336939               | 0.230344  | 2.029642  |
| F           | -0.492618               | -1.789202 | 2.218715  |
| F           | -2.539527               | -1.527990 | 1.489156  |
| C           | 0.707345                | -0.515471 | -0.024266 |
| O           | -1.001997               | -2.215025 | -0.628295 |
| C           | 1.684869                | -1.448025 | -0.411036 |
| C           | 3.037550                | -1.085034 | -0.455627 |
| C           | 3.403443                | 0.220273  | -0.106975 |
| Br          | 5.247339                | 0.723313  | -0.162630 |
| C           | 2.446112                | 1.166660  | 0.281952  |
| C           | 1.097671                | 0.792725  | 0.322800  |
| H           | 1.389170                | -2.464028 | -0.685641 |
| H           | 3.795759                | -1.811914 | -0.757705 |
| H           | 2.747043                | 2.183065  | 0.548316  |
| H           | 0.351411                | 1.530555  | 0.632086  |

Statistical Thermodynamic Analysis  
 Temperature= 298.150 Kelvin Pressure= 1.00000 Atm

SCF Energy= -3635.82253447 Predicted Change= -1.220381D-08  
 Zero-point correction (ZPE)= -3635.6036 0.21886  
 Internal Energy (U)= -3635.5848 0.23772  
 Enthalpy (H)= -3635.5838  
 0.23866

Gibbs Free Energy (G)= -3635.6537  
 0.16876

Frequencies -- 23.2384 29.7192 41.6898

183.15K thermal correction = 0.193073  
 Single point SCF = -3638.587140

## Stepwise Mechanism Additional Structures: M06-2X

### TS-A: HBTM addition to phenylacetic anhydride (Si-face)

183.15K thermal correction = 0.589661  
 Single point SCF = -2087.457971

Using Gaussian 09: AM64L-G09RevD.01 24-Apr-2013

#m062x/6-31G(d) scf=(maxcycle=300,direct,tight)  
 density=current  
 SCRF=(PCM,SOLVENT=CH2Cl2)  
 opt=(maxcycle=250,ts,calcfc, noeigentest,gdiis)  
 iop(1/8=18) freq=noraman temp=298.15  
 #N Geom=AllCheck Guess=TCheck SCRF=Check Test GenChk  
 RM062X/6-31G(d) Freq

Pointgroup= C1 Stoichiometry= C35H34N2O3S  
 C1[X(C35H34N2O3S)] #Atoms= 75  
 Charge = 0 Multiplicity = 1

SCF Energy= -2086.88267267 Predicted Change= -9.816682D-10

Optimization completed. {Found 2 times}  
 Item Max Val. Criteria Pass? RMS Val. Criteria  
 Pass?  
 Force 0.00000 || 0.00045 [ YES ] 0.00000 || 0.00030 [ YES ]  
 Displ 0.00083 || 0.00180 [ YES ] 0.00083 || 0.00180 [ YES ]

| Atomic Type | Coordinates (Angstroms) |           |           |
|-------------|-------------------------|-----------|-----------|
|             | X                       | Y         | Z         |
| C           | -5.864664               | -2.564475 | 0.368713  |
| C           | -4.803869               | -1.845185 | 0.915674  |
| C           | -3.781695               | -1.438314 | 0.063781  |
| C           | -3.812964               | -1.752536 | -1.297264 |
| C           | -4.869070               | -2.472867 | -1.837985 |
| C           | -5.901896               | -2.873553 | -0.991625 |
| N           | -2.645529               | -0.705236 | 0.411005  |
| C           | -1.786085               | -0.452523 | -0.617597 |
| S           | -2.366997               | -1.181235 | -2.128052 |
| C           | -2.412310               | -0.174218 | 1.751702  |
| C           | -1.473138               | 1.028381  | 1.685974  |
| C           | -1.087261               | 1.521241  | 3.093003  |
| C           | -0.366050               | 2.869806  | 3.027849  |
| C           | -2.310745               | 1.653164  | 4.006109  |
| C           | -0.250430               | 0.696047  | 0.797094  |
| C           | 0.718822                | -0.294810 | 1.422949  |
| N           | -0.695913               | 0.229587  | -0.521701 |
| C           | 0.474401                | -1.670479 | 1.426735  |
| C           | 1.374713                | -2.547742 | 2.027147  |
| C           | 2.536476                | -2.065430 | 2.622765  |
| C           | 2.792922                | -0.696648 | 2.616315  |

```

C 1.888363 0.178925 2.021483
C 0.368788 0.371185 -2.023029
C -0.126631 1.689244 -2.628515
C -0.109077 2.887569 -1.719474
O 1.567351 0.560523 -1.212646
C 2.737138 0.672210 -1.854166
C 3.889410 0.485376 -0.895233
C 4.119622 -0.968287 -0.514307
O 2.852156 0.892557 -3.037862
O 0.296124 -0.673264 -2.665964
C -1.274245 3.315018 -1.078498
C -1.249427 4.394274 -0.197402
C -0.052641 5.061579 0.055168
C 1.113972 4.652235 -0.589163
C 1.082345 3.577577 -1.474167
C 5.273779 -1.282883 0.211558
C 5.544673 -2.593103 0.588133
C 4.663652 -3.615256 0.235210
C 3.515895 -3.309616 -0.487911
C 3.238778 -1.993623 -0.859186
H -6.671296 -2.889802 1.017173
H -4.775192 -1.618747 1.975974
H -4.887186 -2.717702 -2.895012
H -6.737317 -3.434419 -1.396780
H -2.001716 -0.965339 2.393597
H -3.382003 0.127717 2.153847
H -0.040977 3.172399 4.028076
H -1.042304 3.641863 2.642767
H 0.514459 2.855827 2.379311
H -0.409724 0.778818 3.535456
H -2.018876 2.102824 4.960073
H -2.774313 0.687712 4.228533
H -3.068339 2.301895 3.548975
H -2.011104 1.840420 1.175042
H 0.292158 1.626542 0.610092
H -0.408954 -2.073965 0.937073
H 1.175942 -3.615314 2.009018
H 3.249989 -2.753779 3.064804
H 3.706783 -0.310160 3.058045
H 2.101604 1.245801 2.003801
H -1.137681 1.494765 -3.000870
H 0.521605 1.850650 -3.496753
H 3.680768 1.067028 0.010331
H 4.785599 0.894548 -1.368544
H -2.209073 2.791984 -1.271064
H -2.165140 4.712872 0.293196
H -0.030322 5.899918 0.744942
H 2.048362 5.175000 -0.407790
H 1.989335 3.269241 -1.989549
H 5.965239 -0.487594 0.481713
H 6.445802 -2.818631 1.150941
H 4.873646 -4.641459 0.521885
H 2.821007 -4.097864 -0.763518
H 2.326900 -1.775982 -1.410335

```

```

-----
Statistical Thermodynamic Analysis
Temperature= 298.150 Kelvin Pressure= 1.00000 Atm

```

```

=====
SCF Energy= -2086.88267267 Predicted Change= -
9.816682D-10
Zero-point correction (ZPE)= -2086.2608 0.62186
Internal Energy (U)= -2086.2260 0.65664
Enthalpy (H)= -2086.2250
0.65758
Gibbs Free Energy (G)= -2086.3275
0.55515
-----
Frequencies -- -142.5381 20.5772 28.3091

```

### B: Acylated-HBTM (S\*\*\*O syn)

```

-----
Using Gaussian 09: AM64L-G09RevD.01 24-Apr-2013
=====

```

```

#m062X/6-31G(d) scf=(direct,tight,maxcycle=300,xqc)
SCRF=(PCM,SOLVENT=CH2Cl2) opt=(maxcycle=250,gdiis)
iop(1/8=18)
freq=noraman temp=298.15
#N Geom=AllCheck Guess=TCheck SCRF=Check Test GenChk
RM062X/6-31G(d) Freq
-----

```

```

Pointgroup= C1 Stoichiometry= C27H27N2OS(1+)
C1[X(C27H27N2OS)] #Atoms= 58
Charge = 1 Multiplicity = 1
-----

```

```

SCF Energy= -1627.39010271 Predicted Change= -1.335823D-
09
=====

```

```

Optimization completed. {Found 2 times}
Item Max Val. Criteria Pass? RMS Val. Criteria
Pass?
Force 0.00000 || 0.00045 [ YES ] 0.00000 || 0.00030 [
YES ]
Displ 0.00086 || 0.00180 [ YES ] 0.00086 || 0.00180 [
YES ]
-----

```

```

Atomic Coordinates (Angstroms)
Type X Y Z
-----

```

```

C 5.913120 -0.936267 0.480225
C 5.475822 0.021115 1.406107
C 4.141094 0.391899 1.485320
C 3.253129 -0.225872 0.606045
C 3.683605 -1.170572 -0.322012
C 5.023991 -1.544130 -0.395398
N 1.871361 -0.005408 0.518853
C 1.269245 -0.710365 -0.439612
S 2.352919 -1.753139 -1.302931
C 1.170036 0.889591 1.454009
C -0.312831 0.558700 1.452325
C -1.140383 1.513820 2.331386
C -2.574196 0.995693 2.483173
C -0.506822 1.679536 3.716240
C -0.812598 0.501933 -0.002768
C -0.767723 1.813537 -0.764731
N -0.054132 -0.562645 -0.709247
C -0.652698 -1.348756 -1.724864
C -2.127435 -1.148529 -1.985467
C -2.996743 -1.613609 -0.829456
O 0.017758 -2.160972 -2.320926
C -1.913132 2.616042 -0.781160
C -1.909674 3.842646 -1.438945
C -0.762085 4.277449 -2.097333
C 0.378214 3.477819 -2.098719
C 0.375651 2.251968 -1.438522
C -2.611873 -2.691560 -0.028469
C -3.408553 -3.090460 1.042466
C -4.597571 -2.419415 1.319011
C -4.990714 -1.349560 0.517511
C -4.191854 -0.946093 -0.549324
H 6.962941 -1.205465 0.444424
H 6.192501 0.483855 2.075426
H 3.809658 1.139701 2.196533
H 5.359702 -2.282303 -1.115505
H 1.364229 1.926939 1.155761
H 1.609176 0.712137 2.436587
H -3.110956 0.914303 1.532931
H -3.149965 1.667026 3.126246

```



|   |           |           |           |
|---|-----------|-----------|-----------|
| H | -2.573548 | 0.001524  | 2.946523  |
| H | -1.163441 | 2.497615  | 1.844052  |
| H | -1.158639 | 2.283536  | 4.353059  |
| H | 0.463700  | 2.182278  | 3.672689  |
| H | -0.371353 | 0.705611  | 4.201572  |
| H | -0.430650 | -0.456770 | 1.858736  |
| H | -1.841935 | 0.152558  | 0.037232  |
| H | -2.337563 | -1.724862 | -2.890090 |
| H | -2.323250 | -0.094122 | -2.210968 |
| H | -2.816884 | 2.277871  | -0.279085 |
| H | -2.807042 | 4.452642  | -1.443199 |
| H | -0.758692 | 5.231002  | -2.615314 |
| H | 1.272663  | 3.803142  | -2.619958 |
| H | 1.273157  | 1.639588  | -1.472520 |
| H | -1.689641 | -3.227746 | -0.242193 |
| H | -3.099340 | -3.928605 | 1.658783  |
| H | -5.215625 | -2.729184 | 2.155455  |
| H | -5.916544 | -0.822717 | 0.725771  |
| H | -4.494165 | -0.104527 | -1.168112 |

-----  
Statistical Thermodynamic Analysis  
Temperature= 298.150 Kelvin    Pressure= 1.00000 Atm  
=====

SCF Energy= -1627.39010271                      Predicted Change= -  
1.335823D-09  
Zero-point correction (ZPE)= -1626.9005                      0.48959  
Internal Energy (U)= -1626.8743                      0.51572  
Enthalpy (H)= -1626.8734  
0.51666  
Gibbs Free Energy (G)= -1626.9576  
0.43248

-----  
Frequencies -- 21.6527                      24.9674                      36.1116

183.15K thermal correction = 0.461176  
Single point SCF = -1627.806482

**B: Acylated-HBTM (S\*\*\*O anti)**

-----  
Using Gaussian 09: AM64L-G09RevD.01 24-Apr-2013  
=====

#m062X/6-31G(d) scf=(direct,tight,maxcycle=300,xqc)  
SCRF=(PCM,SOLVENT=CH2Cl2) opt=(maxcycle=250,gdiis)  
iop(1/8=18)  
freq=norman temp=298.15  
#N Geom=AllCheck Guess=TChek SCRF=Check Test GenChk  
RM062X/6-31G(d) Freq

-----  
Pointgroup= C1    Stoichiometry= C27H27N2OS(1+)  
C1[X(C27H27N2OS)] #Atoms= 58  
Charge = 1                      Multiplicity = 1

-----  
SCF Energy= -1627.37658948    Predicted Change= -1.405462D-  
08  
=====

-----  
Optimization completed.                      {Found 1 times}  
Item    Max Val.    Criteria    Pass?    RMS Val.    Criteria  
Pass?  
Force    0.00000 || 0.00045    [ YES ]    0.00000 || 0.00030    [  
YES ]  
Displ    0.01090 || 0.00180    [ NO ]    0.01090 || 0.00180    [  
NO ]

-----  
Atomic    Coordinates (Angstroms)  
Type    X                      Y                      Z  
-----

|   |           |           |           |
|---|-----------|-----------|-----------|
| C | -4.808917 | 2.369981  | 0.932375  |
| C | -3.828052 | 3.169708  | 1.532477  |
| C | -2.477269 | 2.969583  | 1.280741  |
| C | -2.133321 | 1.942595  | 0.403617  |
| C | -3.107993 | 1.143318  | -0.185450 |
| C | -4.462181 | 1.341079  | 0.066774  |
| C | -0.838301 | 1.570198  | 0.011486  |
| N | -0.788547 | 0.510032  | -0.804421 |
| S | -2.376754 | -0.073127 | -1.203363 |
| C | 0.329176  | 2.369615  | 0.408877  |
| C | 1.459741  | 2.149826  | -0.580148 |
| C | 2.754991  | 2.846198  | -0.119172 |
| C | 3.844414  | 2.748020  | -1.189630 |
| C | 2.498813  | 4.318172  | 0.219622  |
| C | 1.665297  | 0.652027  | -0.833076 |
| C | 2.263617  | -0.148643 | 0.308278  |
| N | 0.381102  | 0.007825  | -1.256064 |
| C | 0.582948  | -1.187782 | -2.039813 |
| C | -0.499415 | -2.234113 | -2.195769 |
| C | -0.798606 | -2.932387 | -0.879681 |
| O | 1.692651  | -1.377467 | -2.468819 |
| C | 3.560690  | -0.649917 | 0.178271  |
| C | 4.133929  | -1.406682 | 1.197128  |
| C | 3.410972  | -1.676739 | 2.356286  |
| C | 2.109555  | -1.196697 | 2.487172  |
| C | 1.536977  | -0.442097 | 1.467151  |
| C | 0.222808  | -3.173637 | 0.042314  |
| C | -0.048169 | -3.846662 | 1.231681  |
| C | -1.337034 | -4.298096 | 1.502137  |
| C | -2.356490 | -4.074333 | 0.577938  |
| C | -2.089034 | -3.391066 | -0.604343 |
| H | -5.855661 | 2.552056  | 1.148708  |
| H | -4.125499 | 3.961090  | 2.211360  |
| H | -1.724223 | 3.583398  | 1.761426  |
| H | -5.215344 | 0.713162  | -0.395529 |
| H | 0.614040  | 2.103011  | 1.432723  |
| H | 0.004797  | 3.410697  | 0.393132  |
| H | 4.151007  | 1.718341  | -1.389816 |
| H | 4.734378  | 3.295882  | -0.868176 |
| H | 3.498436  | 3.190448  | -2.131069 |
| H | 3.104545  | 2.336675  | 0.788900  |
| H | 2.043673  | 4.839835  | -0.630854 |
| H | 3.444884  | 4.815609  | 0.449441  |
| H | 1.847119  | 4.442708  | 1.089471  |
| H | 1.153947  | 2.595624  | -1.537526 |
| H | 2.312051  | 0.551289  | -1.702781 |
| H | -0.071485 | -2.943597 | -2.909068 |
| H | -1.404131 | -1.840382 | -2.664701 |
| H | 4.116741  | -0.468282 | -0.737482 |
| H | 5.140403  | -1.794560 | 1.078467  |
| H | 3.854688  | -2.269980 | 3.149460  |
| H | 1.530876  | -1.422695 | 3.377101  |
| H | 0.502001  | -0.125256 | 1.571789  |
| H | 1.239338  | -2.843258 | -0.163995 |
| H | 0.754051  | -4.016297 | 1.943365  |
| H | -1.547360 | -4.824655 | 2.427622  |
| H | -3.362728 | -4.428402 | 0.778810  |
| H | -2.886693 | -3.216668 | -1.322384 |

-----  
Statistical Thermodynamic Analysis  
Temperature= 298.150 Kelvin    Pressure= 1.00000 Atm  
=====

SCF Energy= -1627.37658948                      Predicted Change= -  
1.405462D-08  
Zero-point correction (ZPE)= -1626.8875                      0.48901  
Internal Energy (U)= -1626.8613                      0.51524  
Enthalpy (H)= -1626.8604  
0.51618

Gibbs Free Energy (G)= -1626.9458  
0.43070

---

Frequencies -- 6.6929 23.8008 31.9658

183.15K thermal correction = 0.459887  
Single point SCF = -1627.794143

**TS-C: Acylated-HBTM deprotonation via phenylacetate (making E)**

Using Gaussian 09: AM64L-G09RevD.01 24-Apr-2013

---

```
#m062x/6-31G(d) scf=(maxcycle=300,direct,tight)
density=current
opt=(maxcycle=250,ts,calcfc,noeigentest,gsdiis) iop(1/8=18)
freq=noraman
temp=298.15 SCRF=(PCM,SOLVENT=dichloromethane)
#N Geom=AllCheck Guess=TCheck SCRF=Check Test GenChk
RM062X/6-31G(d) Freq
```

Pointgroup= C1 Stoichiometry= C35H34N2O3S  
C1[X(C35H34N2O3S)] #Atoms= 75  
Charge = 0 Multiplicity = 1

---

SCF Energy= -2086.86747302 Predicted Change= -3.900977D-10

Optimization completed. {Found 2 times}

| Item  | Max Val. | Criteria | Pass?   | RMS Val. | Criteria        |
|-------|----------|----------|---------|----------|-----------------|
| Force | 0.00000  | 0.00045  | [ YES ] | 0.00000  | 0.00030 [ YES ] |
| Displ | 0.00104  | 0.00180  | [ YES ] | 0.00104  | 0.00180 [ YES ] |

| Atomic Type | Coordinates (Angstroms) |           |           |
|-------------|-------------------------|-----------|-----------|
|             | X                       | Y         | Z         |
| C           | -5.047862               | -2.604998 | 0.802908  |
| C           | -3.822575               | -2.060339 | 1.169049  |
| C           | -2.964615               | -1.662090 | 0.145901  |
| C           | -3.310715               | -1.808057 | -1.194269 |
| C           | -4.541593               | -2.348419 | -1.556142 |
| C           | -5.405878               | -2.747102 | -0.542743 |
| N           | -1.702639               | -1.076969 | 0.296718  |
| C           | -1.080908               | -0.790788 | -0.855082 |
| S           | -2.049823               | -1.194209 | -2.254214 |
| C           | -1.185784               | -0.721006 | 1.620515  |
| C           | -0.061979               | 0.291594  | 1.488478  |
| C           | 0.613069                | 0.534050  | 2.852227  |
| C           | 1.629064                | 1.677110  | 2.794757  |
| C           | -0.426222               | 0.848816  | 3.934334  |
| C           | 0.911457                | -0.177856 | 0.385587  |
| C           | 1.646451                | -1.471745 | 0.704574  |
| N           | 0.163649                | -0.297907 | -0.889136 |
| C           | 1.202397                | -2.718647 | 0.256698  |
| C           | 1.902190                | -3.881020 | 0.577113  |
| C           | 3.058901                | -3.813065 | 1.347500  |
| C           | 3.512908                | -2.573358 | 1.793656  |
| C           | 2.813492                | -1.415276 | 1.473359  |
| C           | 0.764563                | 0.000730  | -2.187752 |
| C           | 2.050846                | 0.620267  | -2.278497 |
| C           | 3.283225                | 0.281360  | -1.484620 |
| O           | 0.008042                | -0.163415 | -3.147585 |
| C           | 3.875842                | 1.208928  | -0.619008 |
| C           | 5.069396                | 0.915256  | 0.039656  |

|   |           |           |           |
|---|-----------|-----------|-----------|
| C | 5.700168  | -0.310383 | -0.163178 |
| C | 5.126755  | -1.241338 | -1.027694 |
| C | 3.933504  | -0.944644 | -1.680388 |
| H | -5.735644 | -2.926660 | 1.577479  |
| H | -3.544997 | -1.959230 | 2.212381  |
| H | -4.815154 | -2.454783 | -2.600606 |
| H | -6.369166 | -3.174189 | -0.800016 |
| H | -0.851757 | -1.638309 | 2.122678  |
| H | -2.025778 | -0.292456 | 2.172749  |
| H | 2.132672  | 1.770152  | 3.762459  |
| H | 1.122364  | 2.619729  | 2.567522  |
| H | 2.392887  | 1.542265  | 2.022794  |
| H | 1.129420  | -0.390480 | 3.142806  |
| H | 0.078107  | 1.127335  | 4.864530  |
| H | -1.075460 | -0.003118 | 4.158717  |
| H | -1.056455 | 1.691646  | 3.626390  |
| H | -0.486267 | 1.243289  | 1.137424  |
| H | 1.621392  | 0.632219  | 0.225316  |
| H | 0.318020  | -2.802691 | -0.368913 |
| H | 1.542699  | -4.838584 | 0.213289  |
| H | 3.608293  | -4.717223 | 1.590486  |
| H | 4.426457  | -2.503612 | 2.376491  |
| H | 3.200532  | -0.451943 | 1.793016  |
| H | 1.532715  | 1.997812  | -2.125572 |
| H | 2.279788  | 0.657777  | -3.346957 |
| H | 3.373962  | 2.158191  | -0.448928 |
| H | 5.507737  | 1.648989  | 0.710776  |
| H | 6.630513  | -0.539130 | 0.348542  |
| H | 5.606255  | -2.202652 | -1.189529 |
| H | 3.488465  | -1.673833 | -2.353551 |
| O | 1.196956  | 2.944202  | 0.081947  |
| C | 0.610400  | 3.334407  | -0.925090 |
| C | -0.619019 | 4.230829  | -0.786619 |
| C | -1.709571 | 3.405831  | -0.143120 |
| O | 0.905745  | 2.992703  | -2.140563 |
| C | -2.370215 | 2.422227  | -0.887757 |
| C | -3.336633 | 1.614769  | -0.293464 |
| C | -3.643090 | 1.764677  | 1.059560  |
| C | -2.982247 | 2.735676  | 1.809550  |
| C | -2.021482 | 3.550100  | 1.209926  |
| H | -0.925973 | 4.594939  | -1.769331 |
| H | -0.361012 | 5.081464  | -0.150171 |
| H | -2.120707 | 2.291882  | -1.939498 |
| H | -3.862151 | 0.871299  | -0.887763 |
| H | -4.397991 | 1.132709  | 1.519742  |
| H | -3.218528 | 2.866004  | 2.861840  |
| H | -1.506541 | 4.305741  | 1.797839  |

Statistical Thermodynamic Analysis  
Temperature= 298.150 Kelvin Pressure= 1.00000 Atm

---

SCF Energy= -2086.86747302 Predicted Change= -3.900977D-10  
Zero-point correction (ZPE)= -2086.2496 0.61782  
Internal Energy (U)= -2086.2146 0.65286  
Enthalpy (H)= -2086.2136 0.65380  
Gibbs Free Energy (G)= -2086.3163 0.55109

---

Frequencies -- -1054.6525 18.2585 25.4597

183.15K thermal correction = 0.585679  
Single point SCF = -2087.448562

**TS-C: Acylated-HBTM deprotonation via N,N-diisopropylethylamine (making E)**

Using Gaussian 09: AM64L-G09RevD.01 24-Apr-2013  
 =====  
 #m062x/6-31G(d) scf=(maxcycle=300,direct,tight)  
 density=current  
 opt=(maxcycle=250,ts,calcf, noeigentest, gdiis) iop(1/8=18)  
 freq=noraman  
 temp=298.15 SCRF=(PCM,SOLVENT=dichloromethane)  
 #N Geom=AllCheck Guess=TCheck SCRF=Check Test GenChk  
 RM062X/6-31G(d) Freq

-----  
 Pointgroup= C1 Stoichiometry= C35H46N3OS(1+)  
 C1[X(C35H46N3OS)] #Atoms= 86  
 Charge = 1 Multiplicity = 1  
 -----  
 SCF Energy= -1998.21989417 Predicted Change= -3.676111D-08

-----  
 Optimization completed. {Found 1 times}  
 Item Max Val. Criteria Pass? RMS Val. Criteria  
 Pass?  
 Force 0.00006 || 0.00045 [ YES ] 0.00000 || 0.00030 [ YES ]  
 Displ 0.00355 || 0.00180 [ NO ] 0.00355 || 0.00180 [ YES ]

| Atomic Coordinates (Angstroms) |           |           |           |
|--------------------------------|-----------|-----------|-----------|
| Type                           | X         | Y         | Z         |
| C                              | 6.392815  | -2.037127 | -0.339536 |
| C                              | 5.499457  | -1.037578 | 0.022636  |
| C                              | 4.147931  | -1.261585 | -0.234413 |
| C                              | 3.707439  | -2.432182 | -0.843663 |
| C                              | 4.606243  | -3.431880 | -1.206814 |
| C                              | 5.953891  | -3.222203 | -0.943291 |
| N                              | 3.082779  | -0.395532 | 0.053444  |
| C                              | 1.882132  | -0.846155 | -0.331268 |
| S                              | 1.970118  | -2.414951 | -1.086105 |
| C                              | 3.292587  | 0.871579  | 0.760585  |
| C                              | 2.004805  | 1.279607  | 1.451959  |
| C                              | 2.136694  | 2.646454  | 2.152402  |
| C                              | 0.926868  | 2.932960  | 3.045321  |
| C                              | 3.411733  | 2.718389  | 3.000119  |
| C                              | 0.842098  | 1.228196  | 0.440713  |
| C                              | 0.892789  | 2.286699  | -0.647260 |
| N                              | 0.752752  | -0.131020 | -0.151787 |
| C                              | 1.632141  | 2.099441  | -1.817542 |
| C                              | 1.685793  | 3.099629  | -2.785244 |
| C                              | 0.997499  | 4.294958  | -2.596047 |
| C                              | 0.248170  | 4.484526  | -1.437331 |
| C                              | 0.193078  | 3.483737  | -0.471793 |
| C                              | -0.488802 | -0.607273 | -0.753922 |
| C                              | -1.679302 | 0.177544  | -0.545534 |
| C                              | -2.775151 | 0.148526  | -1.561145 |
| O                              | -0.425204 | -1.689361 | -1.324753 |
| C                              | -3.698375 | 1.207005  | -1.518798 |
| C                              | -4.803744 | 1.242867  | -2.359041 |
| C                              | -5.012568 | 0.220014  | -3.283809 |
| C                              | -4.094162 | -0.822504 | -3.356166 |
| C                              | -2.988571 | -0.865592 | -2.505520 |
| H                              | 7.450960  | -1.890990 | -0.152463 |
| H                              | 5.849220  | -0.117365 | 0.476378  |
| H                              | 4.261609  | -4.344561 | -1.680976 |
| H                              | 6.675299  | -3.985426 | -1.214030 |
| H                              | 3.636267  | 1.628809  | 0.045446  |
| H                              | 4.079947  | 0.693186  | 1.493279  |
| H                              | 1.024500  | 3.921604  | 3.502174  |
| H                              | 0.868528  | 2.195435  | 3.854926  |
| H                              | -0.024716 | 2.917106  | 2.506549  |

|   |           |           |           |
|---|-----------|-----------|-----------|
| H | 2.198167  | 3.420346  | 1.376880  |
| H | 3.421114  | 3.648974  | 3.574067  |
| H | 4.320642  | 2.702628  | 2.392299  |
| H | 3.455083  | 1.885663  | 3.712589  |
| H | 1.790373  | 0.521943  | 2.220521  |
| H | -0.071397 | 1.353905  | 1.022967  |
| H | 2.160381  | 1.166022  | -1.997245 |
| H | 2.261120  | 2.938032  | -3.691109 |
| H | 1.038046  | 5.071936  | -3.352632 |
| H | -0.301575 | 5.408023  | -1.286899 |
| H | -0.405928 | 3.634864  | 0.423856  |
| H | -2.308733 | -0.401861 | 0.579892  |
| H | -1.493004 | 1.203960  | -0.245495 |
| H | -3.541697 | 2.014618  | -0.805871 |
| H | -5.500883 | 2.073183  | -2.295022 |
| H | -5.875597 | 0.240861  | -0.541625 |
| H | -4.235010 | -1.619222 | -4.080905 |
| H | -2.287269 | -1.687156 | -2.581366 |
| N | -3.025600 | -0.876721 | 1.633426  |
| C | -2.791996 | -2.359922 | 1.707214  |
| C | -2.953870 | -3.080367 | 0.366834  |
| C | -3.597081 | -3.035380 | 2.815770  |
| C | -2.459641 | -0.170969 | 2.839978  |
| C | -2.606033 | 1.349960  | 2.725153  |
| C | -0.993667 | -0.545084 | 3.079386  |
| C | -4.447652 | -0.449199 | 1.465643  |
| C | -5.302911 | -1.169415 | 0.432525  |
| H | -2.518482 | -2.506115 | -0.453806 |
| H | -3.989216 | -3.318781 | 0.125631  |
| H | -2.406836 | -4.025936 | 0.433343  |
| H | -4.673495 | -2.959473 | 2.633650  |
| H | -3.383223 | -2.617206 | 3.803621  |
| H | -3.339545 | -4.097832 | 2.842224  |
| H | -1.732087 | -2.450659 | 1.949771  |
| H | -2.081322 | 1.814807  | 3.563804  |
| H | -3.644263 | 1.681122  | 2.770350  |
| H | -2.166787 | 1.731854  | 1.796969  |
| H | -0.876532 | -1.530411 | 3.534826  |
| H | -0.545203 | 0.180783  | 3.762546  |
| H | -0.420996 | -0.535432 | 2.144663  |
| H | -3.047635 | -0.490220 | 3.710305  |
| H | -5.596243 | -2.171244 | 0.750733  |
| H | -4.814851 | -1.227692 | -0.543213 |
| H | -6.218733 | -0.583276 | 0.311146  |
| H | -4.406016 | 0.603233  | 1.180516  |
| H | -4.937586 | -0.501084 | 2.448263  |

-----  
 Statistical Thermodynamic Analysis  
 Temperature= 298.150 Kelvin Pressure= 1.00000 Atm

-----  
 SCF Energy= -1998.21989417 Predicted Change= -3.676111D-08  
 Zero-point correction (ZPE)= -1997.4659 0.75398  
 Internal Energy (U)= -1997.4275 0.79238  
 Enthalpy (H)= -1997.4265 0.79332  
 Gibbs Free Energy (G)= -1997.5352 0.68461

-----  
 Frequencies -- -1282.2824 17.2359 25.1330

183.15K thermal correction = 0.721022  
 Single point SCF = -1998.754831

-----  
**TS-C: Acylated-HBTM deprotonation via N,N-diisopropylethylamine (making Z)**

-----  
 Using Gaussian 09: AM64L-G09RevD.01 24-Apr-2013

```

=====
#m062x/6-31G(d) scf=(maxcycle=300,direct,tight)
density=current
opt=(maxcycle=250,ts,calcfc,noeigentest,gdiis) iop(1/8=18)
freq=noraman
temp=298.15 SCRF=(PCM,SOLVENT=dichloromethane)
#N Geom=AllCheck Guess=TCHECK SCRF=Check Test GenChk
RM062X/6-31G(d) Freq
-----
Pointgroup= C1  Stoichiometry= C35H46N3OS(1+)
C1[X(C35H46N3OS)] #Atoms= 86
Charge = 1          Multiplicity = 1
-----
SCF Energy= -1998.21300152  Predicted Change= -1.529631D-08
=====
Optimization completed.      {Found 1 times}
Item  Max Val.  Criteria  Pass?  RMS Val.  Criteria
Pass?
Force  0.00001 || 0.00045 [ YES ]   0.00000 || 0.00030 [
YES ]
Disp  0.00602 || 0.00180 [ NO ]    0.00602 || 0.00180 [
NO ]
-----
Atomic  Coordinates (Angstroms)
Type   X           Y           Z
-----
C      6.254912   -1.566960   0.187991
C      5.181433   -0.794966   0.613216
C      3.942429   -1.042370   0.025223
C      3.781061   -2.015104   -0.956652
C      4.858963   -2.790728   -1.376402
C      6.097367   -2.554791   -0.792639
N      2.735592   -0.389323   0.311662
C      1.698008   -0.795394   -0.430375
S      2.116439   -2.095515   -1.512221
C      2.635709   0.585756    1.404639
C      1.179524   0.750833    1.803863
C      1.002413   1.833977    2.883633
C      -0.441550   1.879744    3.389412
C      1.943582   1.587205    4.068342
C      0.353572   0.988555    0.519767
C      0.718583   2.266296   -0.220632
N      0.488397   -0.203917   -0.347721
C      1.576168   2.274392   -1.322971
C      1.888291   3.469564   -1.967804
C      1.345464   4.670330   -1.520245
C      0.484859   4.669148   -0.424982
C      0.173439   3.476323    0.217580
C      -0.603790   -0.720600   -1.158316
C      -1.937101   -0.170891   -1.073410
C      -2.232464   1.311402   -1.042917
O      -0.330800   -1.732796   -1.803638
C      -2.938184   1.935926   -0.009143
C      -3.265608   3.291400   -0.071106
C      -2.896026   4.050866   -1.176566
C      -2.195618   3.446033   -2.219465
C      -1.872071   2.095326   -2.149676
H      7.232931   -1.397641   0.624900
H      5.311067   -0.024581   1.364866
H      4.733022   -3.552271   -2.138390
H      6.954241   -3.142609   -1.103031
H      3.075076   1.534452    1.073811
H      3.225782   0.185041    2.230089
H      -0.550611   2.663201    4.144551
H      -0.708589   0.923909    3.856390
H      -1.173614   2.082942    2.599990
H      1.260889   2.804908    2.443715

```

```

H      1.722256   2.294966   4.872031
H      2.996178   1.718202   3.801646
H      1.811031   0.574301   4.467165
H      0.833708   -0.202643   2.230713
H      -0.700049   1.025747   0.794345
H      1.992903   1.349501   -1.711483
H      2.550681   3.456111   -2.827475
H      1.583595   5.599724   -2.027764
H      0.037801   5.596099   -0.079196
H      -0.531036   3.485586    1.044457
H      -2.440820   -0.584940   -1.952048
H      -2.609952   -1.164771   -0.169673
H      -3.248026   1.357382    0.856206
H      -3.815228   3.748587    0.746579
H      -3.150252   5.105311   -1.225992
H      -1.896652   4.028405   -2.085929
H      -1.327876   1.628270   -2.967482
N      -3.175138   -2.175329    0.412961
C      -2.718472   -3.406679   -0.337727
C      -3.199471   -3.403390   -1.785556
C      -3.123085   -4.710745   -0.513191
C      -2.675722   -2.154511   1.832598
C      -2.881894   -0.770161   2.441289
C      -1.195273   -2.519224   1.930418
C      -4.665577   -2.023108   0.365383
C      -5.131046   -0.944451   -0.602854
H      -2.872808   -2.513569   -2.324695
H      -4.287030   -3.497319   -1.862059
H      -2.759136   -4.268922   -2.288255
H      -4.207477   -4.856489    0.347072
H      -2.773680   -4.776535    1.384169
H      -2.680083   -5.543684   -0.201440
H      -1.629506   -3.332606   -0.362864
H      -2.690813   -0.816481    3.516711
H      -3.891396   -0.376283    2.298576
H      -2.170792   -0.062032    2.006019
H      -0.987489   -3.567653   1.711633
H      -0.855689   -2.318249    2.950741
H      -0.598121   -1.900140    1.250930
H      -3.268269   -2.885927    2.396481
H      -4.813351   -1.154023   -1.627792
H      -4.746350   0.039375   -0.321737
H      -6.223357   -0.901225   -0.588957
H      -5.023988   -1.798631    1.371464
H      -5.104655   -2.986218    0.095491

```

Statistical Thermodynamic Analysis

Temperature= 298.150 Kelvin Pressure= 1.00000 Atm

SCF Energy= -1998.21300152 Predicted Change= -1.529631D-08

Zero-point correction (ZPE)= -1997.4588 0.75414

Internal Energy (U)= -1997.4206 0.79232

Enthalpy (H)= -1997.4197

0.79327

Gibbs Free Energy (G)= -1997.5280

0.68490

Frequencies -- -1311.7412 6.7543 24.0906

183.15K thermal correction = 0.721188

Single point SCF = -1998.748098

D: (Z)-enolate (S•••O syn)

Using Gaussian 09: AM64L-G09RevD.01 24-Apr-2013

#m062X/6-31G(d) scf=(direct,tight,maxcycle=300,xqc)  
 SCRF=(PCM,SOLVENT=CH2Cl2) opt=(maxcycle=250,gdiis)  
 iop(1/8=18)  
 freq=noraman temp=298.15  
 #N Geom=AllCheck Guess=TCheck SCRF=Check Test GenChk  
 RM062X/6-31G(d) Freq

-----  
 Pointgroup= C1 Stoichiometry= C27H26N2OS  
 C1[X(C27H26N2OS)] #Atoms= 57  
 Charge = 0 Multiplicity = 1  
 -----

SCF Energy= -1626.90998011 Predicted Change= -1.315205D-08  
 =====

Optimization completed. {Found 2 times}  
 Item Max Val. Criteria Pass? RMS Val. Criteria  
 Pass?  
 Force 0.00002 || 0.00045 [ YES ] 0.00000 || 0.00030 [ YES ]  
 Displ 0.00120 || 0.00180 [ YES ] 0.00120 || 0.00180 [ YES ]  
 -----

| Atomic Coordinates (Angstroms) |           |           |           |
|--------------------------------|-----------|-----------|-----------|
| Type                           | X         | Y         | Z         |
| C                              | -5.522808 | -1.801019 | 0.540274  |
| C                              | -4.599475 | -0.820490 | 0.191830  |
| C                              | -3.265401 | -1.202003 | 0.078020  |
| C                              | -2.859504 | -2.512951 | 0.314014  |
| C                              | -3.787485 | -3.490940 | 0.655239  |
| C                              | -5.124748 | -3.121840 | 0.767170  |
| N                              | -2.184927 | -0.376189 | -0.255962 |
| C                              | -0.982709 | -0.988049 | -0.237007 |
| S                              | -1.117112 | -2.703362 | 0.109289  |
| C                              | -2.355454 | 1.034359  | -0.603893 |
| C                              | -1.154718 | 1.486935  | -1.417615 |
| C                              | -1.238121 | 2.975887  | -1.830214 |
| C                              | -1.984188 | 3.104155  | -3.161725 |
| C                              | -1.887477 | 3.891338  | -0.785145 |
| C                              | 0.144354  | 1.115742  | -0.675889 |
| C                              | 0.386488  | 1.915611  | 0.588682  |
| N                              | 0.158256  | -0.339527 | -0.420140 |
| C                              | 1.187915  | 3.059090  | 0.530930  |
| C                              | 1.348697  | 3.867471  | 1.652411  |
| C                              | 0.717617  | 3.533698  | 2.848932  |
| C                              | -0.059756 | 2.379892  | 2.921657  |
| C                              | -0.221691 | 1.573060  | 1.798291  |
| C                              | 1.445312  | -1.102402 | -0.371449 |
| C                              | 2.589143  | -0.345633 | -0.282610 |
| C                              | 3.933944  | -0.894585 | -0.255563 |
| O                              | 1.285644  | -2.344708 | -0.407878 |
| C                              | 5.020837  | -0.003283 | -0.127198 |
| C                              | 6.335451  | -0.448698 | -0.097925 |
| C                              | 6.622112  | -1.810602 | -0.197950 |
| C                              | 5.563237  | -2.708189 | -0.325912 |
| C                              | 4.243252  | -2.268204 | -0.354202 |
| H                              | -6.568548 | -1.530136 | 0.638908  |
| H                              | -4.912801 | 0.204560  | 0.027768  |
| H                              | -3.473327 | -4.514145 | 0.834533  |
| H                              | -5.864258 | -3.868055 | 1.037484  |
| H                              | -2.471992 | 1.614844  | 0.317768  |
| H                              | -3.273613 | 1.121064  | -1.191319 |
| H                              | -3.006299 | 2.716413  | -3.076185 |
| H                              | -1.477209 | 2.551181  | -3.958101 |
| H                              | -2.052486 | 4.153396  | -3.464294 |
| H                              | -0.208458 | 3.321452  | -1.991553 |
| H                              | -2.960268 | 3.683186  | -0.695978 |
| H                              | -1.785631 | 4.933414  | -1.102401 |
| H                              | -1.434915 | 3.795468  | 0.205664  |

|   |           |           |           |
|---|-----------|-----------|-----------|
| H | -1.142875 | 0.886243  | -2.336696 |
| H | 0.967060  | 1.291712  | -1.373263 |
| H | 1.688880  | 3.318083  | -0.399459 |
| H | 1.971787  | 4.754339  | 1.593635  |
| H | 0.842457  | 4.162300  | 3.724983  |
| H | -0.539131 | 2.103170  | 3.855383  |
| H | -0.817980 | 0.666553  | 1.874853  |
| H | 2.521530  | 0.727905  | -0.176117 |
| H | 4.814873  | 1.062381  | -0.048449 |
| H | 7.142338  | 0.272456  | 0.003665  |
| H | 7.648572  | -2.163597 | -0.175846 |
| H | 5.766133  | -3.773473 | -0.405112 |
| H | 3.432549  | -2.979357 | -0.451701 |

-----  
 Statistical Thermodynamic Analysis  
 Temperature= 298.150 Kelvin Pressure= 1.00000 Atm  
 =====

SCF Energy= -1626.90998011 Predicted Change= -1.315205D-08  
 Zero-point correction (ZPE)= -1626.4348 0.47518  
 Internal Energy (U)= -1626.4087 0.50120  
 Enthalpy (H)= -1626.4078  
 0.50215  
 Gibbs Free Energy (G)= -1626.4916  
 0.41834  
 -----

Frequencies -- 23.2994 25.8743 36.0946

183.15K thermal correction = 0.446892  
 Single point SCF = -1627.335940

#### D: (Z)-enolate (S\*\*\*O anti)

-----  
 Using Gaussian 09: AM64L-G09RevD.01 24-Apr-2013  
 =====

#m062X/6-31G(d) scf=(direct,tight,maxcycle=300,xqc)  
 SCRF=(PCM,SOLVENT=CH2Cl2) opt=(maxcycle=250,gdiis)  
 iop(1/8=18)  
 freq=noraman temp=298.15  
 #N Geom=AllCheck Guess=TCheck SCRF=Check Test GenChk  
 RM062X/6-31G(d) Freq

-----  
 Pointgroup= C1 Stoichiometry= C27H26N2OS  
 C1[X(C27H26N2OS)] #Atoms= 57  
 Charge = 0 Multiplicity = 1  
 -----

SCF Energy= -1626.90587454 Predicted Change= -1.855391D-09  
 =====

Optimization completed. {Found 2 times}  
 Item Max Val. Criteria Pass? RMS Val. Criteria  
 Pass?  
 Force 0.00001 || 0.00045 [ YES ] 0.00000 || 0.00030 [ YES ]  
 Displ 0.00097 || 0.00180 [ YES ] 0.00097 || 0.00180 [ YES ]  
 -----

| Atomic Coordinates (Angstroms) |          |          |          |
|--------------------------------|----------|----------|----------|
| Type                           | X        | Y        | Z        |
| C                              | 3.500153 | 4.280962 | 0.756344 |
| C                              | 3.358631 | 2.921705 | 0.490540 |
| C                              | 2.079343 | 2.441318 | 0.229066 |
| C                              | 0.973233 | 3.292407 | 0.245341 |
| C                              | 1.116266 | 4.647417 | 0.514672 |
| C                              | 2.395606 | 5.135975 | 0.766890 |

```

N    1.721874    1.119994   -0.068175
C    0.397987    0.930761   -0.261030
S   -0.523315    2.411747   -0.066627
C    2.685744    0.030748   -0.242076
C    2.113281   -0.985232   -1.224441
C    3.077011   -2.165210   -1.493459
C    4.040258   -1.805555   -2.628418
C    3.875164   -2.627645   -0.268257
C    0.705498   -1.419152   -0.777210
C    0.666937   -2.314057    0.444613
N   -0.133446   -0.227454   -0.567314
C    0.592709   -3.698387    0.279796
C    0.643945   -4.545937    1.383735
C    0.758910   -4.014774    2.666507
C    0.807719   -2.633095    2.840974
C    0.757025   -1.787524    1.736070
C   -1.607610   -0.388387   -0.940282
C   -2.453956    0.047567    0.052441
C   -3.901726    0.101249   -0.061281
O   -1.774916   -0.902006   -2.055536
C   -4.606574   -0.256869   -1.229411
C   -5.994117   -0.172767   -1.280554
C   -6.729631    0.264615   -0.179544
C   -6.048519    0.619827    0.984883
C   -4.662642    0.540442    1.041156
H    4.488719    4.677775    0.961102
H    4.219627    2.262828    0.496410
H    0.253018    5.304220    0.526472
H    2.532147    6.191121    0.977125
H    2.897190   -0.415692    0.735271
H    3.608811    0.464428   -0.634708
H    4.652633   -0.935788   -2.361936
H    3.500602   -1.570674   -3.550729
H    4.720968   -2.637572   -2.832708
H    2.460278   -3.007430   -1.834184
H    4.610681   -1.870275    0.028283
H    4.431119   -3.535883   -0.519420
H    3.241707   -2.849084    0.595048
H    1.960996   -0.456661   -2.174956
H    0.231548   -1.935956   -1.616710
H    0.494502   -4.115379   -0.719430
H    0.586353   -5.620540    1.241340
H    0.796098   -4.673589    3.528274
H    0.880145   -2.211578    3.838671
H    0.776913   -0.710219    1.886914
H   -2.022089    0.327926    1.007440
H   -4.044956   -0.600557   -2.090055
H   -6.509062   -0.453869   -2.195830
H   -7.812565    0.326359   -0.226794
H   -6.601391    0.961640    1.856046
H   -4.144495    0.822347    1.955411

```

```

-----
Statistical Thermodynamic Analysis
Temperature= 298.150 Kelvin   Pressure= 1.00000 Atm
-----
SCF Energy= -1626.90587454      Predicted Change= -
1.855391D-09
Zero-point correction (ZPE)=    -1626.4308      0.47505
Internal Energy (U)=            -1626.4045      0.50130
Enthalpy (H)=                   -1626.4036
0.50224
Gibbs Free Energy (G)=          -1626.4883
0.41756
-----
Frequencies --   17.4937         25.1069         38.5078

```

183.15K thermal correction = 0.446436  
Single point SCF = -1627.332841

### D: (E)-enolate (S\*\*\*O syn)

Using Gaussian 09: AM64L-G09RevD.01 24-Apr-2013

```

=====
#m062X/6-31G(d) scf=(direct,tight,maxcycle=300,xqc)
SCRF=(PCM,SOLVENT=CH2Cl2) opt=(maxcycle=250,gdiis)
iop(1/8=18)
freq=noraman temp=298.15
#N Geom=AllCheck Guess=TCheck SCRF=Check Test GenChk
RM062X/6-31G(d) Freq

```

```

-----
Pointgroup= C1  Stoichiometry= C27H26N2OS
C1[X(C27H26N2OS)] #Atoms= 57
Charge = 0      Multiplicity = 1

```

```

-----
SCF Energy= -1626.90045745   Predicted Change= -6.588697D-
09

```

```

=====
Optimization completed.      {Found 2 times}
Item  Max Val.  Criteria  Pass?  RMS Val.  Criteria
Pass?
Force  0.00001 || 0.00045 [ YES ]   0.00000 || 0.00030 [
YES ]
Displ  0.00153 || 0.00180 [ YES ]   0.00153 || 0.00180 [
YES ]

```

```

-----
Atomic  Coordinates (Angstroms)
Type   X           Y           Z

```

```

-----
C    5.368493   -0.233450   1.435598
C    4.043707    0.183535   1.522194
C    3.151136   -0.292924   0.566635
C    3.569264   -1.149277   -0.452776
C    4.894673   -1.558741   -0.539213
C    5.790575   -1.096877   0.421315
N    1.782223   -0.009178   0.483523
C    1.157741   -0.589987   -0.561066
S    2.255052   -1.509544   -1.569289
C    1.081267    0.857592   1.433349
C   -0.404052    0.519174   1.430987
C   -1.230533    1.430827   2.368069
C   -1.251838    0.842890   3.781870
C   -0.762742    2.890305   2.415577
C   -0.942052    0.467259   -0.010183
C   -1.030245    1.804842   -0.716856
N   -0.136792   -0.498051   -0.782782
C   -2.254581    2.477502   -0.720348
C   -2.363152    3.750759   -1.272296
C   -1.247764    4.359555   -1.843333
C   -0.030765    3.682189   -1.873489
C    0.077230    2.409504   -1.317483
C   -0.710704   -1.106733   -2.048615
C   -1.956499   -1.678135   -1.931408
C   -2.695719   -2.064279   -0.737205
O    0.031731   -0.974902   -3.041196
C   -2.081727   -2.435449   0.477465
C   -2.832200   -2.770582   1.600797
C   -4.224858   -2.790330   1.544643
C   -4.852858   -2.474045   0.339451
C   -4.104369   -2.115697   -0.775326
H    6.082929    0.124582   2.168998
H    3.724681    0.862784   2.304790
H    5.220140   -2.220226   -1.335128
H    6.828629   -1.407834   0.375488
H    1.264323    1.899342   1.147414
H    1.513543    0.686194   2.422710
H   -0.238725    0.779237   4.196752

```

|   |           |           |           |
|---|-----------|-----------|-----------|
| H | -1.684762 | -0.162562 | 3.784033  |
| H | -1.845008 | 1.472430  | 4.451996  |
| H | -2.261463 | 1.417213  | 1.989731  |
| H | 0.205239  | 2.975121  | 2.923398  |
| H | -1.481240 | 3.484697  | 2.987824  |
| H | -0.669471 | 3.338860  | 1.422299  |
| H | -0.503241 | -0.510277 | 1.801617  |
| H | -1.946346 | 0.048034  | 0.045142  |
| H | -3.128497 | 1.999179  | -0.284426 |
| H | -3.320189 | 4.263057  | -1.263637 |
| H | -1.330267 | 5.351251  | -2.276830 |
| H | 0.837150  | 4.141403  | -2.336189 |
| H | 1.030141  | 1.887922  | -1.370487 |
| H | -2.420922 | -1.904812 | -2.886812 |
| H | -0.997186 | -2.482705 | 0.527789  |
| H | -2.320415 | -3.043207 | 2.520430  |
| H | -4.809408 | -3.061562 | 2.418023  |
| H | -5.937095 | -2.497356 | 0.270081  |
| H | -4.609818 | -1.854796 | -1.702135 |

-----  
Statistical Thermodynamic Analysis  
Temperature= 298.150 Kelvin    Pressure= 1.00000 Atm  
=====

SCF Energy= -1626.90045745                      Predicted Change= -  
6.588697D-09  
Zero-point correction (ZPE)= -1626.4256            0.47478  
Internal Energy (U)= -1626.3995                    0.50095  
Enthalpy (H)= -1626.3985  
0.50189  
Gibbs Free Energy (G)= -1626.4827  
0.41773

-----  
Frequencies -- 21.5161            26.6595            32.0764

183.15K thermal correction = 0.446411  
Single point SCF = -1627.327826

**D: (E)-enolate (S••O anti)**

-----  
Using Gaussian 09: AM64L-G09RevD.01 24-Apr-2013  
=====

#m062X/6-31G(d) scf=(direct,tight,maxcycle=300,xqc)  
SCRF=(PCM,SOLVENT=CH2Cl2) opt=(maxcycle=250,gdiis)  
iop(1/8=18)  
freq=norman temp=298.15  
#N Geom=AllCheck Guess=TChek SCRF=Check Test GenChk  
RM062X/6-31G(d) Freq

-----  
Pointgroup= C1    Stoichiometry= C27H26N2OS  
C1[X(C27H26N2OS)] #Atoms= 57  
Charge = 0            Multiplicity = 1

-----  
SCF Energy= -1626.89881907    Predicted Change= -6.833766D-  
09

-----  
Optimization completed.            {Found 2 times}  
Item    Max Val.    Criteria    Pass?    RMS Val.    Criteria  
Pass?  
Force    0.00002 || 0.00045    [ YES ]    0.00000 || 0.00030    [  
YES ]  
Displ    0.00064 || 0.00180    [ YES ]    0.00064 || 0.00180    [  
YES ]

-----  
Atomic    Coordinates (Angstroms)  
Type    X            Y            Z  
-----

|   |           |           |           |
|---|-----------|-----------|-----------|
| C | -1.874188 | 4.463343  | 1.645731  |
| C | -0.779662 | 3.673077  | 1.307325  |
| C | -1.010414 | 2.548235  | 0.521375  |
| C | -2.296096 | 2.216634  | 0.092611  |
| C | -3.387065 | 3.008359  | 0.431532  |
| C | -3.162638 | 4.137892  | 1.213396  |
| N | -0.052095 | 1.635742  | 0.064901  |
| C | -0.559055 | 0.610511  | -0.654970 |
| S | -2.294812 | 0.734554  | -0.858539 |
| C | 1.390169  | 1.855317  | 0.206244  |
| C | 2.122341  | 1.109259  | -0.902488 |
| C | 3.659415  | 1.254770  | -0.809362 |
| C | 4.109152  | 2.518121  | -1.549456 |
| C | 4.219219  | 1.268171  | 0.618428  |
| C | 1.633805  | -0.351366 | -0.959859 |
| C | 2.071374  | -1.193644 | 0.220546  |
| N | 0.167589  | -0.372747 | -1.140649 |
| C | 3.173138  | -2.039154 | 0.080778  |
| C | 3.663644  | -2.753821 | 1.171844  |
| C | 3.046816  | -2.639231 | 2.414743  |
| C | 1.929361  | -1.817967 | 2.558355  |
| C | 1.444627  | -1.101149 | 1.468579  |
| C | -0.352106 | -1.170252 | -2.353716 |
| C | -1.477332 | -1.931716 | -2.135826 |
| C | -2.063589 | -2.380798 | -0.876602 |
| O | 0.307510  | -0.939012 | -3.375684 |
| C | -3.450829 | -2.608389 | -0.791884 |
| C | -4.046810 | -3.033339 | 0.390213  |
| C | -3.278565 | -3.237787 | 1.536687  |
| C | -1.900307 | -3.039358 | 1.467054  |
| C | -1.301672 | -2.640391 | 0.276596  |
| H | -1.718924 | 5.344896  | 2.258518  |
| H | 0.217015  | 3.923827  | 1.653610  |
| H | -4.385617 | 2.749097  | 0.096106  |
| H | -4.000308 | 4.768259  | 1.491160  |
| H | 1.704081  | 1.524758  | 1.201254  |
| H | 1.565621  | 2.931777  | 0.125403  |
| H | 3.666102  | 3.414345  | -1.098656 |
| H | 3.816418  | 2.488577  | -2.603273 |
| H | 5.196847  | 2.627008  | -1.499405 |
| H | 4.089802  | 0.390255  | -1.332775 |
| H | 3.933829  | 2.188143  | 1.142210  |
| H | 5.312385  | 1.245556  | 0.578410  |
| H | 3.886470  | 0.414850  | 1.216247  |
| H | 1.800358  | 1.546963  | -1.857226 |
| H | 2.023034  | -0.787278 | -1.883249 |
| H | 3.653574  | -2.136050 | -0.889746 |
| H | 4.523158  | -3.405135 | 1.047390  |
| H | 3.425524  | -3.196536 | 3.265799  |
| H | 1.431488  | -1.736691 | 3.519723  |
| H | 0.552643  | -0.489726 | 1.590015  |
| H | -1.953469 | -2.276255 | -3.049959 |
| H | -4.064082 | -2.430161 | -1.672655 |
| H | -5.120725 | -3.197178 | 0.419844  |
| H | -3.744258 | -3.562032 | 2.462302  |
| H | -1.276744 | -3.222172 | 2.339194  |
| H | -0.222173 | -2.552794 | 0.224864  |

-----  
Statistical Thermodynamic Analysis  
Temperature= 298.150 Kelvin    Pressure= 1.00000 Atm  
=====

SCF Energy= -1626.89881907                      Predicted Change= -  
6.833766D-09  
Zero-point correction (ZPE)= -1626.4245            0.47429  
Internal Energy (U)= -1626.3983                    0.50044  
Enthalpy (H)= -1626.3974  
0.50138  
Gibbs Free Energy (G)= -1626.4809  
0.41787

-----  
Frequencies -- 24.6722 29.5215 39.6264

183.15K thermal correction = 0.446295  
Single point SCF = -1627.326147

**J: Tetrahedral Intermediate (Re,Re)**

-----  
Using Gaussian 09: AM64L-G09RevD.01 24-Apr-2013  
=====

=====

```
#m062x/6-31G(d) gfpri gfinput
scf=(direct,tight,maxcycle=300,xqc)
opt=(maxcycle=250,gsdii) iop(1/8=18) freq=noraman
temp=298.15
SCRF=(PCM,SOLVENT=dichloromethane)
#N Geom=AllCheck Guess=TCheck SCRF=Check Test GenChk
RM062X/6-31G(d) Freq
```

-----  
Pointgroup= C1 Stoichiometry= C35H30BrF3N2O2S  
C1[X(C35H30BrF3N2O2S)] #Atoms= 74  
Charge = 0 Multiplicity = 1

-----  
SCF Energy= -4880.46842385 Predicted Change= -6.642921D-09  
=====

-----  
Optimization completed. {Found 2 times}  
Item Max Val. Criteria Pass? RMS Val. Criteria  
Pass?  
Force 0.00003 || 0.00045 [ YES ] 0.00000 || 0.00030 [ YES ]  
Displ 0.00103 || 0.00180 [ YES ] 0.00103 || 0.00180 [ YES ]

-----

| Atomic Coordinates (Angstroms) |           |           |           |
|--------------------------------|-----------|-----------|-----------|
| Type                           | X         | Y         | Z         |
| N                              | 3.782341  | -0.961380 | -0.203268 |
| C                              | 3.182828  | -2.300758 | -0.206381 |
| C                              | 1.775924  | -2.227329 | -0.777670 |
| C                              | 1.061724  | -3.590341 | -0.702412 |
| C                              | 1.939807  | -4.712618 | -1.265532 |
| C                              | -0.266875 | -3.554854 | -1.460809 |
| C                              | 0.985988  | -1.100719 | -0.088953 |
| C                              | 0.643603  | -1.352727 | 1.366985  |
| N                              | 1.731365  | 0.179299  | -0.251213 |
| C                              | 1.033796  | 1.429751  | -0.363227 |
| C                              | -0.439125 | 1.435916  | -0.002869 |
| C                              | -0.779760 | 2.590039  | 0.920039  |
| O                              | 1.678670  | 2.414890  | -0.636173 |
| C                              | 3.074951  | 0.170300  | -0.302563 |
| S                              | 4.086273  | 1.583340  | -0.436343 |
| C                              | 5.512547  | 0.571613  | -0.283715 |
| C                              | 5.170503  | -0.772715 | -0.168264 |
| C                              | 6.846056  | 0.972296  | -0.279632 |
| C                              | 7.820421  | -0.009354 | -0.147278 |
| C                              | 7.469954  | -1.359257 | -0.021354 |
| C                              | 6.141158  | -1.762994 | -0.029672 |
| C                              | 1.564924  | -1.141538 | 2.396264  |
| C                              | 1.214957  | -1.388079 | 3.721829  |
| C                              | -0.063466 | -1.842218 | 4.035220  |
| C                              | -0.995075 | -2.039605 | 3.017751  |
| C                              | -0.644541 | -1.791428 | 1.693348  |
| C                              | -0.522919 | 3.932116  | 0.615053  |
| C                              | -0.855970 | 4.936420  | 1.518973  |
| C                              | -1.452281 | 4.623464  | 2.739430  |
| C                              | -1.707274 | 3.292151  | 3.056372  |
| C                              | -1.365602 | 2.287283  | 2.154768  |

|    |           |           |           |
|----|-----------|-----------|-----------|
| H  | -0.637751 | 0.537844  | 0.578758  |
| H  | 3.190935  | -2.697894 | 0.816045  |
| H  | 3.823746  | -2.923004 | -0.832816 |
| H  | 0.860141  | -3.809448 | 0.354777  |
| H  | 1.374112  | -5.648188 | -1.291968 |
| H  | 2.834547  | -4.890778 | -0.661780 |
| H  | 2.254476  | -4.482603 | -2.290635 |
| H  | -0.751471 | -4.534670 | -1.414882 |
| H  | -0.097127 | -3.308700 | -2.515824 |
| H  | -0.967463 | -2.820338 | -1.056945 |
| H  | 1.854654  | -1.939523 | -1.835980 |
| H  | 0.088077  | -0.940689 | -0.692810 |
| H  | 7.112936  | 2.019287  | -0.374432 |
| H  | 8.866532  | 0.276526  | -0.138638 |
| H  | 8.247695  | -2.106921 | 0.088406  |
| H  | 5.874615  | -2.808177 | 0.079830  |
| H  | 2.559544  | -0.759724 | 2.176691  |
| H  | 1.941695  | -1.216387 | 4.509394  |
| H  | -0.336356 | -2.030220 | 5.068750  |
| H  | -2.000215 | -2.374543 | 3.253853  |
| H  | -1.387485 | -1.912939 | 0.906751  |
| H  | -0.062568 | 4.188733  | -0.331242 |
| H  | -0.650079 | 5.972353  | 1.266215  |
| H  | -1.712456 | 5.412367  | 3.438698  |
| H  | -2.164998 | 3.032637  | 4.006268  |
| H  | -1.558418 | 1.246125  | 2.408587  |
| C  | -1.210191 | 1.139002  | -1.387202 |
| C  | -1.551243 | 2.446523  | -2.123555 |
| F  | -2.395328 | 3.272743  | -1.465575 |
| F  | -2.138708 | 2.176096  | -3.300616 |
| F  | -0.446407 | 3.165100  | -2.395579 |
| C  | -2.545792 | 0.439901  | -1.024847 |
| O  | -0.412706 | 0.401277  | -2.163459 |
| C  | -2.775921 | -0.803625 | -1.611082 |
| C  | -3.900646 | -1.559925 | -1.287793 |
| C  | -4.805606 | -1.048593 | -0.365849 |
| Br | -6.335399 | -2.071909 | 0.106486  |
| C  | -4.617350 | 0.199861  | 0.217083  |
| C  | -3.488713 | 0.942733  | -0.121476 |
| H  | -2.037721 | -1.158124 | -2.323286 |
| H  | -4.072014 | -2.529429 | -1.744262 |
| H  | -5.342330 | 0.585939  | 0.925433  |
| H  | -3.351073 | 1.919503  | 0.329991  |

-----  
Statistical Thermodynamic Analysis

Temperature= 298.150 Kelvin Pressure= 1.00000 Atm

-----  
SCF Energy= -4880.46842385 Predicted Change= -6.642921D-09  
Zero-point correction (ZPE)= -4879.8816 0.58674  
Internal Energy (U)= -4879.8443 0.62410  
Enthalpy (H)= -4879.8433  
0.62504  
Gibbs Free Energy (G)= -4879.9522  
0.51615

-----  
Frequencies -- 14.6079 20.8613 26.6036

183.15K thermal correction = 0.552812

Single point SCF = -4883.525280

**J: Tetrahedral Intermediate (Si,Re)**

-----  
Using Gaussian 09: AM64L-G09RevD.01 24-Apr-2013  
=====

=====

```
# M062X/6-31G* gfpri gfinput
scf=(direct,tight,maxcycle=300,xqc)
```



opt=(maxcycle=250) freq=noraman iop(1/8=18)  
 Temperature=298.15  
 SCRF=(PCM,SOLVENT=Dichloromethane)  
 #N Geom=AllCheck Guess=TCheck SCRF=Check Test GenChk  
 RM062X/6-31G(d) Freq

-----  
 Pointgroup= C1 Stoichiometry= C35H30BrF3N2O2S  
 C1[X(C35H30BrF3N2O2S)] #Atoms= 74  
 Charge = 0 Multiplicity = 1  
 -----  
 SCF Energy= -4880.46075000 Predicted Change= -1.101517D-08  
 =====

Optimization completed. {Found 2 times}  
 Item Max Val. Criteria Pass? RMS Val. Criteria  
 Pass?  
 Force 0.00002 || 0.00045 [ YES ] 0.00000 || 0.00030 [ YES ]  
 Displ 0.00098 || 0.00180 [ YES ] 0.00098 || 0.00180 [ YES ]  
 -----

| Atomic Type | Coordinates (Angstroms) |           |           |
|-------------|-------------------------|-----------|-----------|
|             | X                       | Y         | Z         |
| C           | 5.116136                | 4.719363  | 0.193160  |
| C           | 4.987924                | 3.348658  | 0.005876  |
| C           | 3.711797                | 2.852576  | -0.248870 |
| C           | 2.600421                | 3.691588  | -0.304664 |
| C           | 2.733881                | 5.064839  | -0.122059 |
| C           | 4.004696                | 5.568219  | 0.129019  |
| N           | 3.362424                | 1.514205  | -0.471355 |
| C           | 2.053218                | 1.314144  | -0.653779 |
| S           | 1.136533                | 2.791443  | -0.660262 |
| C           | 4.361935                | 0.442555  | -0.546667 |
| C           | 3.762718                | -0.759065 | -1.264166 |
| C           | 4.743626                | -1.945857 | -1.318322 |
| C           | 6.126386                | -1.503884 | -1.809615 |
| C           | 4.213190                | -3.052257 | -2.234451 |
| C           | 2.406225                | -1.101047 | -0.604550 |
| C           | 2.527340                | -1.572492 | 0.833956  |
| N           | 1.527317                | 0.085450  | -0.748729 |
| C           | 0.104092                | -0.042962 | -0.921752 |
| C           | -0.550512               | -1.261760 | -0.338458 |
| C           | -1.413302               | -2.031978 | -1.304377 |
| O           | -0.481755               | 0.853774  | -1.479955 |
| C           | 2.499942                | -0.686817 | 1.911821  |
| C           | 2.682953                | -1.158445 | 3.209014  |
| C           | 2.871983                | -2.517204 | 3.444197  |
| C           | 2.868238                | -3.410404 | 2.375824  |
| C           | 2.694507                | -2.938429 | 1.078446  |
| C           | -2.276858               | -1.416168 | -2.218392 |
| C           | -3.066092               | -2.182803 | -3.072392 |
| C           | -3.015378               | -3.574183 | -3.023683 |
| C           | -2.163439               | -4.197481 | -2.114337 |
| C           | -1.368199               | -3.430560 | -1.267777 |
| H           | 6.097200                | 5.135499  | 0.394558  |
| H           | 5.849093                | 2.692749  | 0.066942  |
| H           | 1.869950                | 5.718615  | -0.168937 |
| H           | 4.134708                | 6.634356  | 0.279347  |
| H           | 4.688756                | 0.190283  | 0.469328  |
| H           | 5.207580                | 0.846599  | -1.105473 |
| H           | 4.855187                | -2.346262 | -0.303023 |
| H           | 6.631049                | -0.841789 | -1.100089 |
| H           | 6.051903                | -0.986421 | -2.773689 |
| H           | 6.766552                | -2.379548 | -1.949156 |
| H           | 3.240847                | -3.442505 | -1.921307 |
| H           | 4.912594                | -3.892917 | -2.251203 |
| H           | 4.109658                | -2.679364 | -3.260058 |
| H           | 3.544438                | -0.457043 | -2.298822 |

|    |           |           |           |
|----|-----------|-----------|-----------|
| H  | 1.931302  | -1.882050 | -1.203734 |
| H  | 0.209389  | -1.932330 | 0.062527  |
| H  | 2.281770  | 0.363742  | 1.755036  |
| H  | 2.656545  | -0.460669 | 4.039973  |
| H  | 3.004797  | -2.881936 | 4.458061  |
| H  | 2.993573  | -4.474452 | 2.550165  |
| H  | 2.679900  | -3.642199 | 0.248909  |
| H  | -2.337195 | -0.334030 | -2.250777 |
| H  | -3.730537 | -1.687902 | -3.774697 |
| H  | -3.635920 | -4.168844 | -3.687183 |
| H  | -2.114887 | -5.281229 | -2.064722 |
| H  | -0.708712 | -3.919024 | -0.553597 |
| C  | -2.671026 | 1.409338  | 0.766115  |
| C  | -2.571615 | 0.019170  | 0.713942  |
| C  | -1.175072 | -0.572797 | 1.012140  |
| C  | -1.324382 | -1.730816 | 2.022548  |
| F  | -0.131590 | -2.248092 | 2.356722  |
| F  | -2.065210 | -2.778461 | 1.578222  |
| F  | -1.903513 | -1.311809 | 3.159717  |
| C  | -3.719762 | -0.720529 | 0.407191  |
| C  | -4.935220 | -0.086281 | 0.159955  |
| C  | -4.996004 | 1.300463  | 0.213943  |
| Br | -6.655661 | 2.170545  | -0.112351 |
| C  | -3.873436 | 2.062663  | 0.513122  |
| O  | -0.298029 | 0.307915  | 1.472220  |
| H  | -1.769714 | 1.956169  | 1.022178  |
| H  | -3.682371 | -1.802712 | 0.353699  |
| H  | -5.823354 | -0.663670 | -0.073673 |
| H  | -3.943075 | 3.144751  | 0.554672  |

-----  
 Statistical Thermodynamic Analysis

Temperature= 298.150 Kelvin Pressure= 1.00000 Atm  
 =====

SCF Energy= -4880.46075000 Predicted Change= -1.101517D-08  
 Zero-point correction (ZPE)= -4879.8761 0.58461  
 Internal Energy (U)= -4879.8383 0.62243  
 Enthalpy (H)= -4879.8373 0.62338  
 Gibbs Free Energy (G)= -4879.9478 0.51287  
 -----

Frequencies -- 14.0675 20.8703 26.3214

183.15K thermal correction = 0.550112

Single point SCF = -4883.519544

-----  
**J: Tetrahedral Intermediate (Si,Si)**  
 -----

Using Gaussian 09: AM64L-G09RevD.01 24-Apr-2013  
 =====

# M062X/6-31G\* gfpinput gfinput  
 scf=(direct,tight,maxcycle=300,xqc)  
 opt=(maxcycle=250) freq=noraman iop(1/8=18)  
 Temperature=298.15  
 SCRF=(PCM,SOLVENT=Dichloromethane)  
 #N Geom=AllCheck Guess=TCheck SCRF=Check Test GenChk  
 RM062X/6-31G(d) Freq

-----  
 Pointgroup= C1 Stoichiometry= C35H30BrF3N2O2S  
 C1[X(C35H30BrF3N2O2S)] #Atoms= 74  
 Charge = 0 Multiplicity = 1  
 -----

SCF Energy= -4880.46088821 Predicted Change= -3.187508D-08  
 =====

Optimization completed. {Found 1 times}  
 Item Max Val. Criteria Pass? RMS Val. Criteria  
 Pass?  
 Force 0.00001 || 0.00045 [ YES ] 0.00000 || 0.00030 [ YES ]  
 Displ 0.00750 || 0.00180 [ NO ] 0.00750 || 0.00180 [ NO ]

| Atomic Type | Coordinates (Angstroms) |           |           |
|-------------|-------------------------|-----------|-----------|
|             | X                       | Y         | Z         |
| N           | -2.335317               | 2.015725  | -0.180436 |
| C           | -2.263058               | 2.461424  | 1.216493  |
| C           | -0.809367               | 2.666494  | 1.613515  |
| C           | -0.665497               | 3.004299  | 3.109243  |
| C           | -1.625327               | 4.126163  | 3.519083  |
| C           | 0.770301                | 3.420094  | 3.441966  |
| C           | 0.016378                | 1.432616  | 1.189598  |
| C           | -0.336912               | 0.167388  | 1.947428  |
| N           | -0.112716               | 1.261013  | -0.278350 |
| C           | 1.022357                | 0.915870  | -1.105495 |
| C           | 2.224557                | 0.332465  | -0.446144 |
| C           | 3.404712                | 1.260759  | -0.578651 |
| O           | 0.916410                | 1.110019  | -2.294334 |
| C           | -1.287468               | 1.552870  | -0.870047 |
| S           | -1.646509               | 1.300296  | -2.553806 |
| C           | -3.318961               | 1.741214  | -2.255602 |
| C           | -3.516174               | 2.115081  | -0.928805 |
| C           | -4.365965               | 1.783099  | -3.172296 |
| C           | -5.612980               | 2.192338  | -2.716679 |
| C           | -5.807403               | 2.557510  | -1.378583 |
| C           | -4.763441               | 2.526229  | -0.463409 |
| C           | -1.473887               | -0.585966 | 1.640366  |
| C           | -1.845775               | -1.660925 | 2.441823  |
| C           | -1.069439               | -2.015060 | 3.542483  |
| C           | 0.090822                | -1.300236 | 3.828206  |
| C           | 0.453683                | -0.214505 | 3.034722  |
| C           | 3.839964                | 1.694797  | -1.835500 |
| C           | 4.941486                | 2.539733  | -1.936524 |
| C           | 5.621029                | 2.958326  | -0.792951 |
| C           | 5.197264                | 2.519353  | 0.459420  |
| C           | 4.095876                | 1.673325  | 0.564165  |
| H           | 2.035831                | 0.117625  | 0.605378  |
| H           | -2.762107               | 1.721301  | 1.853229  |
| H           | -2.813801               | 3.402201  | 1.267488  |
| H           | -0.920331               | 2.106537  | 3.687409  |
| H           | -1.434870               | 4.415782  | 4.556202  |
| H           | -2.674824               | 3.824730  | 3.453090  |
| H           | -1.479081               | 5.013483  | 2.891229  |
| H           | 1.506576                | 2.638823  | 3.232755  |
| H           | 0.851595                | 3.667058  | 4.504217  |
| H           | 1.051925                | 4.309493  | 2.866477  |
| H           | -0.420794               | 3.516571  | 1.034437  |
| H           | 1.064505                | 1.680181  | 1.358702  |
| H           | -4.210369               | 1.499742  | -4.207476 |
| H           | -6.447344               | 2.227699  | -3.408466 |
| H           | -6.791044               | 2.870325  | -1.046105 |
| H           | -4.920210               | 2.802565  | 0.573320  |
| H           | -2.074271               | -0.358536 | 0.762678  |
| H           | -2.721989               | -2.245743 | 2.179972  |
| H           | -1.356198               | -2.859803 | 4.161078  |
| H           | 0.715176                | -1.583961 | 4.669353  |
| H           | 1.358969                | 0.342047  | 3.266953  |
| H           | 3.316886                | 1.335956  | -2.714224 |
| H           | 5.275744                | 2.871311  | -2.915434 |
| H           | 6.478121                | 3.619798  | -0.877216 |
| H           | 5.724371                | 2.833028  | 1.355723  |
| H           | 3.774551                | 1.317803  | 1.541433  |
| C           | 2.493832                | -1.136689 | -1.204736 |
| C           | 3.766607                | -1.689169 | -0.496399 |

|    |           |           |           |
|----|-----------|-----------|-----------|
| F  | 4.886654  | -1.167847 | -1.007065 |
| F  | 3.860405  | -3.024066 | -0.651026 |
| F  | 3.821043  | -1.462195 | 0.845132  |
| C  | 1.270230  | -1.998206 | -0.782858 |
| O  | 2.685786  | -1.059391 | -2.484961 |
| C  | 0.222279  | -2.068152 | -1.701635 |
| C  | -0.936627 | -2.789998 | -1.423016 |
| C  | -1.014524 | -3.484785 | -0.222935 |
| Br | -2.583724 | -4.473169 | 0.194486  |
| C  | 0.024174  | -3.459433 | 0.698508  |
| C  | 1.151887  | -2.692522 | 0.425036  |
| H  | 0.351208  | -1.557249 | -2.651210 |
| H  | -1.755500 | -2.831266 | -2.134054 |
| H  | -0.057960 | -4.011007 | 1.628639  |
| H  | 1.947682  | -2.660339 | 1.162052  |

#### Statistical Thermodynamic Analysis

Temperature= 298.150 Kelvin Pressure= 1.00000 Atm

SCF Energy= -4880.46088821 Predicted Change= -3.187508D-08  
 Zero-point correction (ZPE)= -4879.8756 0.58521  
 Internal Energy (U)= -4879.8380 0.62281  
 Enthalpy (H)= -4879.8371 0.62375  
 Gibbs Free Energy (G)= -4879.9464 0.51442

Frequencies -- 10.6968 22.4048 31.4219

183.15K thermal correction = 0.551220

Single point SCF = -4883.519505

#### TS-K: C-O bond formation (Re,Re)

Using Gaussian 09: AM64L-G09RevD.01 24-Apr-2013

#m062x/6-31G(d) scf=(maxcycle=300,direct,tight)  
 density=current  
 SCRF=(PCM,SOLVENT=CH2Cl2)  
 opt=(maxcycle=250,ts,calcfc,oeigentest,gdiis)  
 iop(1/8=18) freq=noraman temp=298.15  
 #N Geom=AllCheck Guess=TCheck SCRF=Check Test GenChk  
 RM062X/6-31G(d) Freq

Pointgroup= C1 Stoichiometry= C35H30BrF3N2O2S  
 C1[X(C35H30BrF3N2O2S)] #Atoms= 74  
 Charge = 0 Multiplicity = 1

SCF Energy= -4880.46685695 Predicted Change= -1.751084D-10

Optimization completed. {Found 2 times}  
 Item Max Val. Criteria Pass? RMS Val. Criteria  
 Pass?  
 Force 0.00000 || 0.00045 [ YES ] 0.00000 || 0.00030 [ YES ]  
 Displ 0.00062 || 0.00180 [ YES ] 0.00062 || 0.00180 [ YES ]

| Atomic Type | Coordinates (Angstroms) |   |   |
|-------------|-------------------------|---|---|
|             | X                       | Y | Z |

|   |          |           |           |
|---|----------|-----------|-----------|
| N | 3.637901 | -1.140278 | -0.180804 |
| C | 2.965485 | -2.442911 | -0.114492 |
| C | 1.592207 | -2.335089 | -0.760037 |

C 0.800689 -3.652288 -0.652029  
C 1.644732 -4.847818 -1.106449  
C -0.480622 -3.585984 -1.486560  
C 0.840882 -1.125910 -0.170186  
C 0.439916 -1.280992 1.285916  
N 1.658244 0.095107 -0.389385  
C 1.015441 1.381009 -0.646212  
C -0.375384 1.574569 -0.035754  
C -0.495232 2.781553 0.869629  
O 1.724501 2.285538 -1.030019  
C 2.990479 0.013509 -0.404125  
S 4.080160 1.357268 -0.641840  
C 5.444868 0.297513 -0.323379  
C 5.031857 -1.014106 -0.104517  
C 6.794243 0.635657 -0.295676  
C 7.714827 -0.372476 -0.033180  
C 7.293959 -1.687637 0.193682  
C 5.946948 -2.029619 0.161868  
C 1.322667 -1.014993 2.335640  
C 0.911188 -1.159055 3.659125  
C -0.389474 -1.563644 3.948273  
C -1.281778 -1.816214 2.907677  
C -0.870332 -1.671234 1.585843  
C -0.114992 4.074149 0.490028  
C -0.248984 5.136948 1.378422  
C -0.765496 4.931664 2.657032  
C -1.139645 3.649261 3.048514  
C -0.997095 2.584737 2.161692  
H -0.585830 0.714805 0.598539  
H 2.902566 -2.765309 0.932007  
H 3.597358 -3.143818 -0.662742  
H 0.530148 -3.803211 0.401746  
H 1.028645 -5.751095 -1.128042  
H 2.487446 -5.044649 -0.437317  
H 2.037156 -4.685370 -2.117626  
H -1.021146 -4.534928 -1.422559  
H -0.240011 -3.402748 -2.540651  
H -1.160601 -2.795911 -1.158683  
H 1.740940 -2.116150 -1.827365  
H -0.039545 -0.946297 -0.792809  
H 7.114807 1.656993 -0.471718  
H 8.772366 -0.133949 -0.003160  
H 8.029292 -2.457664 0.400048  
H 5.624653 -3.047921 0.348616  
H 2.333809 -0.669495 2.131554  
H 1.607634 -0.945162 4.463690  
H -0.710520 -1.669370 4.979673  
H -2.304240 -2.111950 3.121828  
H -1.583050 -1.833847 0.779067  
H 0.295771 4.239551 -0.497745  
H 0.051847 6.133502 1.069064  
H -0.870960 5.765372 3.344641  
H -1.535540 3.474112 4.044331  
H -1.277475 1.579710 2.474664  
C -1.221778 1.320371 -1.332896  
C -1.670031 2.610024 -2.029646  
F -2.476695 3.385701 -1.273400  
F -2.354424 2.323665 -3.150807  
F -0.628970 3.373598 -2.398119  
C -2.485406 0.522453 -0.973288  
O -0.357064 0.652073 -2.143589  
C -2.759083 -0.640008 -1.690375  
C -3.839168 -1.453568 -1.350506  
C -4.646017 -1.083347 -0.281066  
Br -6.117239 -2.183680 0.199846  
C -4.404265 0.080153 0.442174  
C -3.325142 0.882720 0.084404  
H -2.090518 -0.901220 -2.505119  
H -4.049160 -2.362668 -1.904551  
H -5.047869 0.351799 1.271864

H -3.131668 1.791654 0.647405

Statistical Thermodynamic Analysis  
Temperature= 298.150 Kelvin Pressure= 1.00000 Atm

SCF Energy= -4880.46685695 Predicted Change= -1.751084D-10  
Zero-point correction (ZPE)= -4879.8819 0.58495  
Internal Energy (U)= -4879.8447 0.62207  
Enthalpy (H)= -4879.8438  
0.62301  
Gibbs Free Energy (G)= -4879.9532  
0.51360

Frequencies -- -198.6191 10.7846 19.5330

183.15K thermal correction = 0.550511  
Single point SCF = -4883.522045

### TS-K: C-O bond formation (Si,Re)

Using Gaussian 09: AM64L-G09RevD.01 24-Apr-2013

#m062x/6-31G(d) scf=(maxcycle=300,direct,tight)  
density=current  
SCRF=(PCM,SOLVENT=CH2Cl2)  
opt=(maxcycle=250,ts,calcfc, noeigentest,gdiis)  
iop(1/8=18) freq=noraman temp=298.15  
#N Geom=AllCheck Guess=TChek SCRF=Check Test GenChk  
RM062X/6-31G(d) Freq

Pointgroup= C1 Stoichiometry= C35H30BrF3N2O2S  
C1[X(C35H30BrF3N2O2S)] #Atoms= 74  
Charge = 0 Multiplicity = 1

SCF Energy= -4880.46112948 Predicted Change= -3.013245D-09

Optimization completed. {Found 2 times}  
Item Max Val. Criteria Pass? RMS Val. Criteria  
Pass?  
Force 0.00001 || 0.00045 [ YES ] 0.00000 || 0.00030 [ YES ]  
Displ 0.00149 || 0.00180 [ YES ] 0.00149 || 0.00180 [ YES ]

Atomic Coordinates (Angstroms)  
Type X Y Z

N -3.749050 0.996060 0.067733  
C -4.346325 -0.287555 0.461738  
C -3.283181 -1.239355 0.996970  
C -3.844492 -2.661811 1.174886  
C -5.162304 -2.648070 1.955713  
C -2.834309 -3.560325 1.891890  
C -2.042747 -1.184194 0.084812  
C -2.269927 -1.720298 -1.319945  
N -1.544555 0.211653 0.081997  
C -0.138108 0.543718 0.220384  
C 0.695753 -0.304609 1.177768  
C 1.453266 0.474827 2.227193  
O 0.227103 1.601053 -0.239620  
C -2.432232 1.200303 -0.073042  
S -2.044683 2.849616 -0.484505  
C -3.754201 3.254030 -0.445610  
C -4.533727 2.135958 -0.156428

```

C -4.342172 4.493236 -0.680401
C -5.728581 4.577918 -0.625201
C -6.507453 3.449979 -0.341597
C -5.923376 2.211918 -0.102519
C -2.967365 -1.033297 -2.316389
C -3.189829 -1.622566 -3.561301
C -2.725178 -2.906852 -3.823234
C -2.015458 -3.593567 -2.839450
C -1.781185 -2.998838 -1.605058
C 2.183984 1.636300 1.946280
C 2.905978 2.275934 2.950369
C 2.925818 1.761980 4.245352
C 2.213271 0.600437 4.532956
C 1.481338 -0.031210 3.531094
C 1.457352 -1.178203 0.098326
C 2.822914 -0.572781 -0.278826
C 1.681218 -2.574584 0.702860
F 2.325118 -2.563511 1.892873
F 2.377023 -3.373417 -0.114586
F 0.502254 -3.198445 0.940228
O 0.594329 -1.267070 -0.932593
C 2.926534 -0.022157 -1.554666
C 4.110094 0.565143 -1.994106
C 5.203240 0.586079 -1.137855
Br 6.837205 1.356598 -1.734142
C 5.133470 0.044295 0.140115
C 3.938530 -0.529224 0.565592
H 0.022741 -0.981984 1.711722
H -4.854683 -0.710275 -0.413617
H -5.090418 -0.065128 1.229053
H -4.038437 -3.074832 0.175744
H -5.494990 -3.672780 2.144620
H -5.965694 -2.139302 1.414531
H -5.033258 -2.153317 2.926128
H -3.247208 -4.565547 2.016006
H -2.613243 -3.162504 2.889880
H -1.889507 -3.655927 1.351378
H -2.964451 -0.871861 1.983350
H -1.240594 -1.778268 0.511000
H -3.735389 5.363757 -0.905017
H -6.211305 5.531847 -0.807066
H -7.587694 3.539477 -0.306779
H -6.529940 1.339756 0.114144
H -3.332404 -0.022863 -2.154902
H -3.726725 -1.069429 -4.325637
H -2.900382 -3.364332 -4.791987
H -1.624648 -4.586330 -3.040349
H -1.175524 -3.508890 -0.862347
H 2.191004 2.033967 0.937890
H 3.465158 3.176484 2.714632
H 3.494261 2.261399 5.024115
H 2.222631 0.186990 5.537029
H 0.929925 -0.940070 3.760266
H 2.050254 -0.075531 -2.190893
H 4.187391 0.992231 -2.988316
H 5.998680 0.071819 0.793420
H 3.887800 -0.936202 1.570004

```

```

-----
Statistical Thermodynamic Analysis
Temperature= 298.150 Kelvin Pressure= 1.00000 Atm
=====
SCF Energy= -4880.46112948 Predicted Change= -
3.013245D-09
Zero-point correction (ZPE)= -4879.8757 0.58536
Internal Energy (U)= -4879.8386 0.62244
Enthalpy (H)= -4879.8377
0.62339
Gibbs Free Energy (G)= -4879.9469
0.51416

```

```

-----
Frequencies -- -103.0372 18.0861 23.8775

```

```

183.15K thermal correction = 0.551005
Single point SCF = -4883.516236

```

**TS-K: C-O bond formation (Si,Si)**

```

-----
Using Gaussian 09: AM64L-G09RevD.01 24-Apr-2013
=====

```

```

#m062x/6-31G(d) scf=(maxcycle=300,direct,tight)
density=current
opt=(maxcycle=250,ts,calcf, noeigentest, gdiis) iop(1/8=18)
freq=noraman
temp=298.15 SCRF=(PCM,SOLVENT=dichloromethane)
#N Geom=AllCheck Guess=TCheck SCRF=Check Test GenChk
RM062X/6-31G(d) Freq

```

```

-----
Pointgroup= C1 Stoichiometry= C35H30BrF3N2O2S
C1[X(C35H30BrF3N2O2S)] #Atoms= 74
Charge = 0 Multiplicity = 1

```

```

-----
SCF Energy= -4880.44435372 Predicted Change= -1.767556D-
08
=====

```

```

Optimization completed. {Found 2 times}
Item Max Val. Criteria Pass? RMS Val. Criteria
Pass?
Force 0.00001 || 0.00045 [ YES ] 0.00000 || 0.00030 [
YES ]
Displ 0.00141 || 0.00180 [ YES ] 0.00141 || 0.00180 [
YES ]

```

```

-----
Atomic Coordinates (Angstroms)
Type X Y Z
-----
N -3.233148 0.498248 -1.288690
C -3.427601 1.895671 -0.884048
C -2.071146 2.533658 -0.610474
C -2.189184 3.997788 -0.123897
C -3.375274 4.272790 0.808683
C -2.250358 4.944365 -1.326555
C -1.240961 1.636439 0.326927
C -1.772704 1.555044 1.740677
N -1.112293 0.290576 -0.289342
C 0.292936 -0.158496 -0.619550
C 0.892347 -1.414060 0.035834
C -0.098808 -2.362513 0.662682
O 0.798148 0.403798 -1.553064
C -2.095309 -0.173352 -1.042796
S -2.072410 -1.745220 -1.805757
C -3.668727 -1.445864 -2.480712
C -4.156998 -0.204107 -2.073548
C -4.424475 -2.284761 -3.291087
C -5.686405 -1.848242 -3.683036
C -6.177634 -0.607278 -3.267064
C -5.422177 0.231790 -2.454918
C -1.166544 2.334516 2.726931
C -1.688335 2.377346 4.016626
C -2.814761 1.623369 4.339999
C -3.405495 0.814948 3.371165
C -2.887719 0.782003 2.078327
C -0.145330 -3.690694 0.231172
C -1.095542 -4.573008 0.741711
C -2.014675 -4.132226 1.690619
C -1.958508 -2.814526 2.145758
C -1.001038 -1.939218 1.644812

```

|    |           |           |           |
|----|-----------|-----------|-----------|
| C  | 1.817773  | -0.586633 | 0.998138  |
| C  | 2.223859  | -1.369985 | 2.262153  |
| F  | 2.629258  | -2.628438 | 1.973268  |
| F  | 1.240778  | -1.476244 | 3.162476  |
| F  | 3.247368  | -0.769721 | 2.897763  |
| C  | 3.139003  | -0.255338 | 0.265729  |
| O  | 1.071162  | 0.503278  | 1.302636  |
| C  | 3.974747  | -1.232967 | -0.279172 |
| C  | 5.151850  | -0.881342 | -0.933826 |
| C  | 5.487210  | 0.463856  | -1.035125 |
| Br | 7.075780  | 0.955655  | -1.956851 |
| C  | 4.678904  | 1.455168  | -0.492817 |
| C  | 3.505534  | 1.082897  | 0.157615  |
| H  | 1.443927  | -1.941828 | -0.748965 |
| H  | -4.077468 | 1.913863  | -0.003784 |
| H  | -3.937133 | 2.403098  | -1.707493 |
| H  | -1.266202 | 4.218399  | 0.428858  |
| H  | -3.293548 | 5.288425  | 1.207160  |
| H  | -3.422712 | 3.582502  | 1.655747  |
| H  | -4.324829 | 4.215600  | 0.263373  |
| H  | -1.360331 | 4.849212  | -1.955778 |
| H  | -2.324161 | 5.983915  | -0.993269 |
| H  | -3.129585 | 4.732164  | -1.946556 |
| H  | -1.516969 | 2.539867  | -1.559125 |
| H  | -0.219858 | 2.015620  | 0.368325  |
| H  | -4.040663 | -3.248408 | -3.607270 |
| H  | -6.295352 | -2.483101 | -4.317067 |
| H  | -7.166150 | -0.289082 | -3.579519 |
| H  | -5.810635 | 1.188922  | -2.125162 |
| H  | -0.272418 | 2.900177  | 2.480372  |
| H  | -1.208137 | 2.990747  | 4.772681  |
| H  | -3.220811 | 1.653082  | 5.346247  |
| H  | -4.270197 | 0.207422  | 3.620184  |
| H  | -3.345443 | 0.122747  | 1.342940  |
| H  | 0.559039  | -4.032682 | -0.523837 |
| H  | -1.121593 | -5.600543 | 0.391766  |
| H  | -2.763852 | -4.814228 | 2.081377  |
| H  | -2.659200 | -2.464265 | 2.899085  |
| H  | -0.924377 | -0.923965 | 2.017830  |
| H  | 3.714937  | -2.285097 | -0.199377 |
| H  | 5.797322  | -1.639506 | -1.364056 |
| H  | 4.960525  | 2.499027  | -0.583420 |
| H  | 2.838387  | 1.822544  | 0.587092  |

Statistical Thermodynamic Analysis  
Temperature= 298.150 Kelvin Pressure= 1.00000 Atm

SCF Energy= -4880.44435372 Predicted Change= -1.767556D-08  
Zero-point correction (ZPE)= -4879.8592 0.58506  
Internal Energy (U)= -4879.8223 0.62205  
Enthalpy (H)= -4879.8213  
0.62299  
Gibbs Free Energy (G)= -4879.9288  
0.51547

Frequencies -- -178.8855 20.4693 27.6730

183.15K thermal correction = 0.551652  
Single point SCF = -4883.500615

#### F: Product-catalyst complex (Re,Re)

Using Gaussian 09: AM64L-G09RevD.01 24-Apr-2013

#m062X/6-31G(d) scf=(direct,tight,maxcycle=300,xqc)

SCRF=(PCM,SOLVENT=CH2Cl2) opt=(maxcycle=250,gdiis)  
iop(1/8=18)  
freq=norman temp=298.15  
#N Geom=AllCheck Guess=TChek SCRF=Check Test GenChk  
RM062X/6-31G(d) Freq

Pointgroup= C1 Stoichiometry= C35H30BrF3N2O2S  
C1[X(C35H30BrF3N2O2S)] #Atoms= 74  
Charge = 0 Multiplicity = 1

SCF Energy= -4880.48047793 Predicted Change= -5.845818D-09

Optimization completed. {Found 1 times}  
Item Max Val. Criteria Pass? RMS Val. Criteria  
Pass?  
Force 0.00001 || 0.00045 [ YES ] 0.00000 || 0.00030 [ YES ]  
Displ 0.00206 || 0.00180 [ NO ] 0.00206 || 0.00180 [ YES ]

| Atomic Type | Coordinates (Angstroms) |           |           |
|-------------|-------------------------|-----------|-----------|
|             | X                       | Y         | Z         |
| N           | 3.235595                | -1.534621 | -0.215116 |
| C           | 2.480848                | -2.788021 | -0.279231 |
| C           | 1.213827                | -2.579765 | -1.098609 |
| C           | 0.316359                | -3.829251 | -1.110540 |
| C           | 1.114204                | -5.085896 | -1.474842 |
| C           | -0.840318               | -3.661087 | -2.101121 |
| C           | 0.507809                | -1.302220 | -0.589121 |
| C           | -0.018264               | -1.423093 | 0.836523  |
| N           | 1.422163                | -0.161545 | -0.760368 |
| C           | 0.905845                | 1.293413  | -1.141350 |
| C           | -0.072786               | 1.817132  | -0.027139 |
| C           | 0.235399                | 3.078879  | 0.727473  |
| O           | 1.843049                | 1.979570  | -1.610061 |
| C           | 2.704956                | -0.336000 | -0.544041 |
| S           | 3.916196                | 0.941461  | -0.562164 |
| C           | 5.123998                | -0.214662 | 0.004328  |
| C           | 4.593159                | -1.497912 | 0.123626  |
| C           | 6.463896                | 0.024104  | 0.287065  |
| C           | 7.252757                | -1.044659 | 0.706060  |
| C           | 6.710422                | -2.326265 | 0.833244  |
| C           | 5.371084                | -2.572105 | 0.543955  |
| C           | 0.737785                | -1.063540 | 1.957171  |
| C           | 0.200526                | -1.176718 | 3.238106  |
| C           | -1.099810               | -1.645381 | 3.418829  |
| C           | -1.860563               | -2.005083 | 2.309299  |
| C           | -1.319230               | -1.894346 | 1.031994  |
| C           | 0.895787                | 4.174012  | 0.157023  |
| C           | 1.158360                | 5.309613  | 0.918966  |
| C           | 0.770388                | 5.374459  | 2.255958  |
| C           | 0.127418                | 4.284532  | 2.837486  |
| C           | -0.128621               | 3.146255  | 2.078147  |
| H           | -0.279741               | 1.032205  | 0.702832  |
| H           | 2.251229                | -3.125328 | 0.739888  |
| H           | 3.132708                | -3.525037 | -0.753706 |
| H           | -0.095678               | -3.967195 | -0.102447 |
| H           | 0.438771                | -5.940029 | -1.578629 |
| H           | 1.855429                | -5.345310 | -0.713255 |
| H           | 1.634457                | -4.951378 | -2.430904 |
| H           | -1.477062               | -4.550569 | -2.093953 |
| H           | -0.452091               | -3.532200 | -3.118359 |
| H           | -1.476135               | -2.799370 | -1.876105 |
| H           | 1.515040                | -2.372352 | -2.135524 |
| H           | -0.332999               | -1.084676 | -1.249602 |
| H           | 6.882274                | 1.020294  | 0.186542  |
| H           | 8.299301                | -0.876758 | 0.936594  |

|    |           |           |           |
|----|-----------|-----------|-----------|
| H  | 7.338571  | -3.146412 | 1.164122  |
| H  | 4.949544  | -3.565453 | 0.652818  |
| H  | 1.740310  | -0.659018 | 1.841164  |
| H  | 0.798679  | -0.886960 | 4.096350  |
| H  | -1.518282 | -1.721188 | 4.417484  |
| H  | -2.885329 | -2.349711 | 2.422874  |
| H  | -1.929629 | -2.157976 | 0.173146  |
| H  | 1.218565  | 4.114122  | -0.873780 |
| H  | 1.673451  | 6.150336  | 0.463447  |
| H  | 0.977393  | 6.264503  | 2.842562  |
| H  | -0.167249 | 4.315172  | 3.882208  |
| H  | -0.609136 | 2.286736  | 2.542494  |
| C  | -1.157531 | 1.692567  | -1.128185 |
| C  | -1.622608 | 2.994160  | -1.770889 |
| F  | -2.276046 | 3.760722  | -0.883273 |
| F  | -2.465065 | 2.746383  | -2.787306 |
| F  | -0.611934 | 3.710593  | -2.268274 |
| C  | -2.364866 | 0.864783  | -0.744998 |
| O  | -0.274942 | 1.025879  | -2.023230 |
| C  | -2.831792 | -0.135750 | -1.596665 |
| C  | -3.874138 | -0.970089 | -1.198867 |
| C  | -4.441252 | -0.780817 | 0.056890  |
| Br | -5.733972 | -2.010897 | 0.694089  |
| C  | -4.037542 | 0.255767  | 0.890725  |
| C  | -2.998207 | 1.081454  | 0.478481  |
| H  | -2.351744 | -0.284422 | -2.559962 |
| H  | -4.218428 | -1.774136 | -1.840713 |
| H  | -4.503520 | 0.391436  | 1.860445  |
| H  | -2.654387 | 1.878155  | 1.133343  |

-----  
 Statistical Thermodynamic Analysis

Temperature= 298.150 Kelvin    Pressure= 1.00000 Atm

=====

|                              |                |                   |               |
|------------------------------|----------------|-------------------|---------------|
| SCF Energy=                  | -4880.48047793 | Predicted Change= | -5.845818D-09 |
| Zero-point correction (ZPE)= | -4879.8936     |                   | 0.58681       |
| Internal Energy (U)=         | -4879.8566     |                   | 0.62380       |
| Enthalpy (H)=                |                |                   | -4879.8557    |
|                              | 0.62474        |                   |               |
| Gibbs Free Energy (G)=       |                |                   | -4879.9639    |
|                              | 0.51650        |                   |               |

-----  
 Frequencies --    7.2337            25.0185            30.5485

183.15K thermal correction = 0.552943

Single point SCF = -4883.530863

**F: Product-catalyst complex (Si,Re)**

-----  
 Using Gaussian 09: AM64L-G09RevD.01 24-Apr-2013

=====

```
#m062X/6-31G(d) scf=(direct,tight,maxcycle=300,xqc)
SCRF=(PCM,SOLVENT=CH2Cl2) opt=(maxcycle=250,gdiis)
iop(1/8=18)
freq=norman temp=298.15
#N Geom=AllCheck Guess=TCheck SCRF=Check Test GenChk
RM062X/6-31G(d) Freq
```

-----  
 Pointgroup= C1    Stoichiometry= C35H30BrF3N2O2S

C1[X(C35H30BrF3N2O2S)] #Atoms= 74

Charge = 0            Multiplicity = 1

-----  
 SCF Energy= -4880.47711884    Predicted Change= -6.486395D-09

-----  
 Optimization completed.            {Found 2 times}

| Item  | Max Val. | Criteria | Pass?   | RMS Val. | Criteria        |
|-------|----------|----------|---------|----------|-----------------|
| Pass? |          |          |         |          |                 |
| Force | 0.00001  | 0.00045  | [ YES ] | 0.00000  | 0.00030 [ YES ] |
| Displ | 0.00128  | 0.00180  | [ YES ] | 0.00128  | 0.00180 [ YES ] |

-----  
 Atomic Coordinates (Angstroms)

| Atom | Type | X         | Y         | Z         |
|------|------|-----------|-----------|-----------|
| N    |      | -3.675372 | 1.014784  | -0.213593 |
| C    |      | -4.368473 | -0.131171 | 0.378817  |
| C    |      | -3.377440 | -1.009759 | 1.131213  |
| C    |      | -4.029980 | -2.306771 | 1.640754  |
| C    |      | -5.346872 | -2.022673 | 2.370177  |
| C    |      | -3.082364 | -3.061508 | 2.576956  |
| C    |      | -2.136618 | -1.254637 | 0.248104  |
| C    |      | -2.388518 | -2.131894 | -0.967047 |
| N    |      | -1.551965 | 0.037675  | -0.134857 |
| C    |      | -0.014428 | 0.222537  | -0.208618 |
| C    |      | 0.669926  | 0.021177  | 1.200998  |
| C    |      | 1.335230  | 1.170059  | 1.891702  |
| O    |      | 0.294790  | 1.191129  | -0.950380 |
| C    |      | -2.337299 | 1.059500  | -0.392325 |
| S    |      | -1.796479 | 2.614436  | -1.006542 |
| C    |      | -3.466607 | 3.184325  | -0.990432 |
| C    |      | -4.347615 | 2.194121  | -0.560821 |
| C    |      | -3.939509 | 4.435941  | -1.367838 |
| C    |      | -5.310780 | 4.670317  | -1.308920 |
| C    |      | -6.188837 | 3.669619  | -0.884239 |
| C    |      | -5.720380 | 2.414959  | -0.504744 |
| C    |      | -2.992323 | -1.644390 | -2.129286 |
| C    |      | -3.244508 | -2.492865 | -3.205092 |
| C    |      | -2.894069 | -3.838594 | -3.133971 |
| C    |      | -2.274915 | -4.328673 | -1.986595 |
| C    |      | -2.018969 | -3.478228 | -0.914713 |
| C    |      | 2.085820  | 2.127646  | 1.196040  |
| C    |      | 2.702661  | 3.170134  | 1.882206  |
| C    |      | 2.587985  | 3.271975  | 3.267803  |
| C    |      | 1.846130  | 2.324401  | 3.968566  |
| C    |      | 1.225384  | 1.283976  | 3.281579  |
| C    |      | 1.468832  | -1.077876 | 0.446372  |
| C    |      | 2.853191  | -0.685726 | -0.035690 |
| C    |      | 1.525405  | -2.423997 | 1.160669  |
| F    |      | 2.240126  | -2.347740 | 2.294485  |
| F    |      | 2.074829  | -3.369018 | 0.391754  |
| F    |      | 0.302275  | -2.869263 | 1.512129  |
| O    |      | 0.509680  | -1.133745 | -0.600550 |
| C    |      | 3.072132  | -0.495886 | -1.398535 |
| C    |      | 4.321390  | -0.098550 | -1.867528 |
| C    |      | 5.348236  | 0.109421  | -0.955602 |
| Br   |      | 7.048600  | 0.672942  | -1.581756 |
| C    |      | 5.153116  | -0.069952 | 0.409075  |
| C    |      | 3.900335  | -0.466302 | 0.864291  |
| H    |      | -0.016766 | -0.473574 | 1.896836  |
| H    |      | -4.883012 | -0.690857 | -0.412757 |
| H    |      | -5.117462 | 0.271918  | 1.063289  |
| H    |      | -4.248910 | -2.940880 | 0.771169  |
| H    |      | -5.737337 | -2.944939 | 2.809799  |
| H    |      | -6.117419 | -1.627558 | 1.701655  |
| H    |      | -5.193357 | -1.302039 | 3.182781  |
| H    |      | -3.553040 | -3.984189 | 2.928654  |
| H    |      | -2.848185 | -2.447665 | 3.455124  |
| H    |      | -2.137205 | -3.334809 | 2.100359  |
| H    |      | -3.027589 | -0.440136 | 2.005373  |
| H    |      | -1.378848 | -1.744649 | 0.853402  |
| H    |      | -3.255027 | 5.208537  | -1.702803 |
| H    |      | -5.699685 | 5.639777  | -1.601416 |
| H    |      | -7.254795 | 3.867736  | -0.850933 |
| H    |      | -6.405808 | 1.637822  | -0.184871 |

|   |           |           |           |
|---|-----------|-----------|-----------|
| H | -3.253781 | -0.592854 | -2.217716 |
| H | -3.709420 | -2.096782 | -4.102520 |
| H | -3.090315 | -4.498372 | -3.973358 |
| H | -1.978242 | -5.371396 | -1.929285 |
| H | -1.504820 | -3.857620 | -0.035701 |
| H | 2.166852  | 2.049015  | 0.118208  |
| H | 3.279795  | 3.906508  | 1.330648  |
| H | 3.075263  | 4.085070  | 3.797579  |
| H | 1.749786  | 2.393410  | 5.048012  |
| H | 0.648370  | 0.544064  | 3.831946  |
| H | 2.247589  | -0.638741 | -2.086792 |
| H | 4.492257  | 0.054072  | -2.927397 |
| H | 5.963147  | 0.109452  | 1.107123  |
| H | 3.739539  | -0.580285 | 1.931044  |

-----  
Statistical Thermodynamic Analysis

Temperature= 298.150 Kelvin Pressure= 1.00000 Atm

=====

|                              |                |                   |   |
|------------------------------|----------------|-------------------|---|
| SCF Energy=                  | -4880.47711884 | Predicted Change= | - |
| 6.486395D-09                 |                |                   |   |
| Zero-point correction (ZPE)= | -4879.8914     | 0.58569           |   |
| Internal Energy (U)=         | -4879.8540     | 0.62311           |   |
| Enthalpy (H)=                |                | -4879.8530        |   |
| 0.62405                      |                |                   |   |
| Gibbs Free Energy (G)=       |                | -4879.9641        |   |
| 0.51295                      |                |                   |   |

-----

|                |         |         |         |
|----------------|---------|---------|---------|
| Frequencies -- | 13.0991 | 17.2418 | 25.1432 |
|----------------|---------|---------|---------|

183.15K thermal correction = 0.550483

Single point SCF = -4883.528244

**F: Product-catalyst complex (Si,Si)**

-----

Using Gaussian 09: AM64L-G09RevD.01 24-Apr-2013

=====

```
#m062x/6-31G(d) gfpint gfinput
scf=(direct,tight,maxcycle=300,xcq)
opt=(maxcycle=250,gdiis) iop(1/8=18) freq=noraman
temp=298.15
SCRF=(PCM,SOLVENT=dichloromethane)
#N Geom=AllCheck Guess=TCheck SCRF=Check Test GenChk
RM062X/6-31G(d) Freq
```

-----

```
Pointgroup= C1 Stoichiometry= C35H30BrF3N2O2S
C1[X(C35H30BrF3N2O2S)] #Atoms= 74
Charge = 0 Multiplicity = 1
```

-----

|             |                |                   |               |
|-------------|----------------|-------------------|---------------|
| SCF Energy= | -4880.46481161 | Predicted Change= | -3.875149D-09 |
|-------------|----------------|-------------------|---------------|

-----

```
Optimization completed. {Found 2 times}
Item Max Val. Criteria Pass? RMS Val. Criteria
Pass?
Force 0.00000 || 0.00045 [ YES ] 0.00000 || 0.00030 [ YES ]
Displ 0.00143 || 0.00180 [ YES ] 0.00143 || 0.00180 [ YES ]
```

-----

|        |                         |   |   |
|--------|-------------------------|---|---|
| Atomic | Coordinates (Angstroms) |   |   |
| Type   | X                       | Y | Z |

-----

|   |           |           |           |
|---|-----------|-----------|-----------|
| N | -3.121574 | -1.288305 | -0.368709 |
| C | -4.051265 | -0.167661 | -0.523017 |
| C | -3.294769 | 1.154049  | -0.577631 |
| C | -4.253014 | 2.357384  | -0.528937 |

|    |           |           |           |
|----|-----------|-----------|-----------|
| C  | -5.413442 | 2.193065  | -1.516704 |
| C  | -3.515345 | 3.663378  | -0.836300 |
| C  | -2.226175 | 1.154297  | 0.539366  |
| C  | -2.822823 | 1.155519  | 1.941441  |
| N  | -1.308201 | 0.024063  | 0.311448  |
| C  | 0.129520  | 0.269243  | 0.989426  |
| C  | 1.038951  | 1.146112  | 0.032232  |
| C  | 0.565486  | 2.216444  | -0.915166 |
| O  | 0.020829  | 0.507603  | 2.196045  |
| C  | -1.826276 | -1.139534 | 0.002272  |
| S  | -1.000676 | -2.695254 | 0.087235  |
| C  | -2.488915 | -3.516595 | -0.364879 |
| C  | -3.529418 | -2.610854 | -0.567216 |
| C  | -2.690284 | -4.881314 | -0.531942 |
| C  | -3.962068 | -5.320587 | -0.891425 |
| C  | -5.004702 | -4.410431 | -1.081747 |
| C  | -4.804171 | -3.042049 | -0.922742 |
| C  | -3.084783 | 2.385714  | 2.550060  |
| C  | -3.687621 | 2.451886  | 3.803325  |
| C  | -4.032371 | 1.281391  | 4.473823  |
| C  | -3.761191 | 0.049798  | 3.883126  |
| C  | -3.159684 | -0.012968 | 2.628869  |
| C  | 0.921278  | 3.539856  | -0.617197 |
| C  | 0.515057  | 4.600974  | -1.422124 |
| C  | -0.252601 | 4.359243  | -2.557782 |
| C  | -0.616542 | 3.050833  | -2.867302 |
| C  | -0.221158 | 1.992743  | -2.053311 |
| C  | 1.708858  | -0.197769 | -0.356766 |
| C  | 1.511668  | -0.756666 | -1.764420 |
| F  | 2.093318  | -1.959243 | -1.875166 |
| F  | 2.047776  | 0.044689  | -2.695967 |
| F  | 0.218588  | -0.935844 | -2.084889 |
| C  | 3.192076  | -0.256346 | -0.041485 |
| O  | 0.921626  | -0.946795 | 0.555383  |
| C  | 4.061747  | 0.686284  | -0.593304 |
| C  | 5.423090  | 0.638236  | -0.313618 |
| C  | 5.901342  | -0.363291 | 0.524770  |
| Br | 7.755772  | -0.430316 | 0.920343  |
| C  | 5.051920  | -1.309109 | 1.085486  |
| C  | 3.691441  | -1.251058 | 0.795046  |
| H  | 1.724245  | 1.623599  | 0.737189  |
| H  | -4.602254 | -0.333299 | -1.451654 |
| H  | -4.761718 | -0.185448 | 0.314397  |
| H  | -4.675913 | 2.414017  | 0.482065  |
| H  | -6.076517 | 1.365113  | -1.248856 |
| H  | -5.037088 | 2.018776  | -2.532302 |
| H  | -6.018511 | 3.104304  | -1.536650 |
| H  | -4.175966 | 4.518991  | -0.665855 |
| H  | -3.201721 | 3.680927  | -1.885792 |
| H  | -2.615895 | 3.807989  | -0.229066 |
| H  | -2.750013 | 1.196425  | -1.531067 |
| H  | -1.608049 | 2.049324  | 0.435715  |
| H  | -1.878653 | -5.585311 | -0.381244 |
| H  | -4.142512 | -6.382128 | -1.021775 |
| H  | -5.989726 | -4.770961 | -1.358141 |
| H  | -5.617098 | -2.338838 | -1.066358 |
| H  | -2.804774 | 3.304981  | 2.040794  |
| H  | -3.876787 | 3.419360  | 4.258291  |
| H  | -4.497796 | 1.328563  | 5.453383  |
| H  | -4.009330 | -0.870210 | 4.403326  |
| H  | -2.932770 | -0.989116 | 2.210538  |
| H  | 1.529564  | 3.738649  | 0.261476  |
| H  | 0.806940  | 5.614274  | -1.163658 |
| H  | -0.565073 | 5.181215  | -3.194419 |
| H  | -1.218717 | 2.846773  | -3.748265 |
| H  | -0.527578 | 0.989952  | -2.318638 |
| H  | 3.675060  | 1.470072  | -1.239701 |
| H  | 6.103030  | 1.370398  | -0.734732 |
| H  | 5.446508  | -2.076591 | 1.741911  |
| H  | 3.006639  | -1.971140 | 1.229589  |

```

-----
Statistical Thermodynamic Analysis
Temperature= 298.150 Kelvin   Pressure= 1.00000 Atm
=====
SCF Energy= -4880.46481161      Predicted Change= -
3.875149D-09
Zero-point correction (ZPE)= -4879.8797      0.58505
Internal Energy (U)= -4879.8422      0.62254
Enthalpy (H)= -4879.8413
0.62349
Gibbs Free Energy (G)= -4879.9512
0.51359
-----
Frequencies -- 15.4153      26.1363      27.6666

183.15K thermal correction = 0.550637
Single point SCF = -4883.516679

```

**TS-G: Catalyst release (Re,Re)**

```

-----
Using Gaussian 09: AM64L-G09RevD.01 24-Apr-2013
=====
#m062x/6-31G(d) scf=(maxcycle=300,direct,tight)
density=current
opt=(maxcycle=250,ts,calcf, noeigentest, gdiis) iop(1/8=18)
freq=noraman
temp=298.15 SCRF=(PCM,SOLVENT=dichloromethane)
#N Geom=AllCheck Guess=TCheck SCRF=Check Test GenChk
RM062X/6-31G(d) Freq
-----
Pointgroup= C1   Stoichiometry= C35H30BrF3N2O2S
C1[X(C35H30BrF3N2O2S)] #Atoms= 74
Charge = 0      Multiplicity = 1
-----
SCF Energy= -4880.47359971      Predicted Change= 2.199179D-
09
=====

```

```

Optimization completed.      {Found 2 times}
Item Max Val. Criteria Pass? RMS Val. Criteria
Pass?
Force 0.00000 || 0.00045 [ YES ] 0.00000 || 0.00030 [
YES ]
Displ 0.00127 || 0.00180 [ YES ] 0.00127 || 0.00180 [
YES ]

```

```

-----
Atomic Coordinates (Angstroms)
Type X Y Z
-----
N -2.984714 -1.492874 -0.338326
C -2.677908 -2.791604 0.263419
C -1.986907 -2.567475 1.607537
C -1.627528 -3.893951 2.299445
C -2.837736 -4.833231 2.367360
C -1.107420 -3.646110 3.718301
C -0.802169 -1.585239 1.394810
C 0.293663 -2.148043 0.496446
N -1.338484 -0.325589 0.867355
C -0.867932 1.212645 1.489622
C -0.169017 1.948678 0.288880
C -0.595339 3.335293 -0.112936
O -1.768797 1.655206 2.201648
C -2.376314 -0.359445 0.091877
S -3.145081 1.083832 -0.565196
C -4.227723 0.071454 -1.518995
C -4.011759 -1.285178 -1.261529
C -5.211110 0.482207 -2.408543

```

```

C -5.973813 -0.494652 -3.045744
C -5.752694 -1.849696 -2.791673
C -4.768544 -2.263931 -1.897461
C 0.407974 -1.782905 -0.846635
C 1.397366 -2.338595 -1.656389
C 2.278754 -3.284469 -1.141057
C 2.181585 -3.647635 0.200615
C 1.208134 -3.074107 1.013026
C -1.206556 4.234025 0.768971
C -1.580116 5.502843 0.331230
C -1.352298 5.895660 -0.985576
C -0.760653 5.002121 -1.875454
C -0.396510 3.731523 -1.440682
H -0.147591 1.314840 -0.601788
H -2.049376 -3.379458 -0.417556
H -3.629707 -3.308782 0.401403
H -0.847889 -4.394522 1.712368
H -2.595443 -5.710098 2.974965
H -3.143111 -5.194300 1.381257
H -3.694730 -4.329950 2.831423
H -0.842917 -4.594496 4.195242
H -1.884302 -3.168447 4.326847
H -0.223427 -3.002877 3.747400
H -2.699241 -2.040633 2.259696
H -0.364184 -1.330531 2.363945
H -5.379179 1.536450 -2.601486
H -6.745582 -0.194598 -3.746242
H -6.352364 -2.597473 -3.299588
H -4.590748 -3.317461 -3.710342
H -0.269807 -1.046584 -1.270017
H 1.478933 -2.026027 -2.693299
H 3.057009 -3.705946 -1.770066
H 2.879250 -4.364559 0.623284
H 1.169422 -3.342283 2.065599
H -1.401239 3.925782 1.788322
H -2.054721 6.188657 1.026829
H -1.643048 6.887314 -1.318698
H -0.590409 5.288906 -2.908802
H 0.039598 3.028327 -2.147210
C 1.127901 1.663970 1.091737
C 1.735832 2.868359 1.805109
F 2.204280 3.763384 0.922062
F 2.762070 2.491094 2.583733
F 0.855942 3.488940 2.596030
C 2.220167 0.922406 0.360430
O 0.442424 0.873184 2.062100
C 2.881047 -0.129587 0.991177
C 3.872513 -0.835718 0.321756
C 4.187759 -0.477335 -0.983350
Br 5.441259 -1.526082 -1.942295
C 3.571504 0.593858 -1.617163
C 2.588591 1.299478 -0.929521
H 2.590151 -0.417658 1.996566
H 4.370585 -1.675544 0.792701
H 3.841752 0.860878 -2.632752
H 2.095806 2.140293 -1.410400

```

```

-----
Statistical Thermodynamic Analysis
Temperature= 298.150 Kelvin   Pressure= 1.00000 Atm
=====
SCF Energy= -4880.47359971      Predicted Change=
2.199179D-09
Zero-point correction (ZPE)= -4879.8889      0.58463
Internal Energy (U)= -4879.8521      0.62147
Enthalpy (H)= -4879.8511
0.62242
Gibbs Free Energy (G)= -4879.9590
0.51455
-----

```



Frequencies -- -55.5479 13.2478 24.6150

183.15K thermal correction = 0.550880

Single point SCF = -4883.525472

### TS-G: Catalyst release (Si,Re)

Using Gaussian 09: AM64L-G09RevD.01 24-Apr-2013

#m062x/6-31G(d) scf=(maxcycle=300,direct,tight)  
density=current  
SCRF=(PCM,SOLVENT=CH2Cl2)  
opt=(maxcycle=250,ts,calcfc, noeigentest, gdiis)  
iop(1/8=18) freq=noraman temp=298.15  
#N Geom=AllCheck Guess=TCheck SCRF=Check Test GenChk  
RM062X/6-31G(d) Freq

Pointgroup= C1 Stoichiometry= C35H30BrF3N2O2S  
C1[X(C35H30BrF3N2O2S)] #Atoms= 74  
Charge = 0 Multiplicity = 1

SCF Energy= -4880.47409106 Predicted Change= -1.425042D-09

Optimization completed on the basis of negligible forces.

{Found 2 times}

| Item  | Max Val. | Criteria | Pass?   | RMS Val. | Criteria        |
|-------|----------|----------|---------|----------|-----------------|
| Pass? |          |          |         |          |                 |
| Force | 0.00000  | 0.00045  | [ YES ] | 0.00000  | 0.00030 [ YES ] |
| Displ | 0.00265  | 0.00180  | [ NO ]  | 0.00265  | 0.00180 [ YES ] |

Atomic Coordinates (Angstroms)

| Type | X | Y | Z |
|------|---|---|---|
|------|---|---|---|

|   |           |           |           |
|---|-----------|-----------|-----------|
| N | -3.878220 | 0.551010  | 0.174098  |
| C | -4.381069 | -0.756185 | 0.597787  |
| C | -3.224213 | -1.609966 | 1.117645  |
| C | -3.665725 | -3.036208 | 1.487592  |
| C | -4.940794 | -3.034830 | 2.337333  |
| C | -2.553447 | -3.763543 | 2.250020  |
| C | -2.053843 | -1.566697 | 0.106535  |
| C | -2.334445 | -2.263558 | -1.216208 |
| N | -1.655331 | -0.177545 | -0.103738 |
| C | 0.009778  | 0.228368  | -0.755882 |
| C | 0.685737  | 1.021277  | 0.412806  |
| C | 1.464848  | 2.244325  | 0.035778  |
| O | -0.110882 | 0.562895  | -1.921602 |
| C | -2.560448 | 0.738090  | -0.117028 |
| S | -2.222552 | 2.421894  | -0.536366 |
| C | -3.909699 | 2.837889  | -0.232963 |
| C | -4.657451 | 1.707153  | 0.113666  |
| C | -4.507342 | 4.086150  | -0.335160 |
| C | -5.874707 | 4.188434  | -0.082977 |
| C | -6.620820 | 3.058838  | 0.255845  |
| C | -6.023782 | 1.803783  | 0.356035  |
| C | -2.988081 | -1.624961 | -2.273898 |
| C | -3.256876 | -2.308663 | -3.457261 |
| C | -2.867990 | -3.637797 | -3.604672 |
| C | -2.201261 | -4.278404 | -2.562863 |
| C | -1.934300 | -3.592467 | -1.381136 |
| C | 2.236265  | 2.290485  | -1.132100 |
| C | 2.970678  | 3.429356  | -1.445141 |
| C | 2.944998  | 4.538118  | -0.599775 |
| C | 2.174891  | 4.504733  | 0.559711  |
| C | 1.437484  | 3.363955  | 0.871128  |

|    |           |           |           |
|----|-----------|-----------|-----------|
| C  | 1.424054  | -0.332055 | 0.652392  |
| C  | 2.915506  | -0.390181 | 0.409183  |
| C  | 1.086039  | -0.980406 | 1.992950  |
| F  | 1.763262  | -0.415633 | 3.001544  |
| F  | 1.379063  | -2.285934 | 1.972919  |
| F  | -0.219870 | -0.875572 | 2.295265  |
| O  | 0.682720  | -0.995450 | -0.373157 |
| C  | 3.421018  | -1.259677 | -0.554782 |
| C  | 4.790644  | -1.324380 | -0.799204 |
| C  | 5.643498  | -0.508491 | -0.068111 |
| Br | 7.509024  | -0.579119 | -0.402081 |
| C  | 5.160226  | 0.368177  | 0.898594  |
| C  | 3.791820  | 0.422704  | 1.133412  |
| H  | -0.002700 | 1.245011  | 1.230301  |
| H  | -4.890768 | -1.242956 | -0.244463 |
| H  | -5.111435 | -0.580207 | -0.590619 |
| H  | -3.875653 | -3.581565 | 0.557679  |
| H  | -5.169745 | -4.051344 | 2.670822  |
| H  | -5.810803 | -2.668604 | 1.784295  |
| H  | -4.812158 | -2.410664 | 3.230306  |
| H  | -2.860981 | -4.786196 | 2.487784  |
| H  | -2.343343 | -3.246181 | 3.193882  |
| H  | -1.615490 | -3.821686 | 1.690718  |
| H  | -2.847174 | -1.127431 | 2.031501  |
| H  | -1.190133 | -2.056006 | 0.555849  |
| H  | -3.923158 | 4.959237  | -0.606118 |
| H  | -6.359479 | 5.155798  | -0.157406 |
| H  | -7.685433 | 3.152839  | 0.442095  |
| H  | -6.610364 | 0.927442  | 0.609280  |
| H  | -3.274472 | -0.579606 | -2.192209 |
| H  | -3.762868 | -1.796005 | -4.269459 |
| H  | -3.073230 | -4.167166 | -4.529880 |
| H  | -1.878638 | -5.309274 | -2.672130 |
| H  | -1.399985 | -4.094058 | -0.577907 |
| H  | 2.254147  | 1.430905  | -1.794492 |
| H  | 3.566580  | 3.451391  | -2.352400 |
| H  | 3.521059  | 5.424612  | -0.846897 |
| H  | 2.145467  | 5.365109  | 1.221237  |
| H  | 0.834397  | 3.339155  | 1.775840  |
| H  | 2.736810  | -1.877579 | -1.125462 |
| H  | 5.187655  | -1.998636 | -1.549641 |
| H  | 5.842358  | 1.003337  | 1.452563  |
| H  | 3.405451  | 1.119422  | 1.870855  |

### Statistical Thermodynamic Analysis

Temperature= 298.150 Kelvin Pressure= 1.00000 Atm

SCF Energy= -4880.47409106 Predicted Change= -1.425042D-09

Zero-point correction (ZPE)= -4879.8895 0.58449

Internal Energy (U)= -4879.8521 0.62193

Enthalpy (H)= -4879.8512

0.62288

Gibbs Free Energy (G)= -4879.9629

0.51118

Frequencies -- -141.7196 14.6497 17.1040

183.15K thermal correction = 0.548971

Single point SCF = -4883.525698

### TS-G: Catalyst release (Si,Si)

Using Gaussian 09: AM64L-G09RevD.01 24-Apr-2013

#m062x/6-31G(d) scf=(maxcycle=300,direct,tight)  
density=current

opt=(maxcycle=250,ts,calcf,oeigentest,gdiis) iop(1/8=18)  
 freq=norman  
 temp=298.15 SCRF=(PCM,SOLVENT=dichloromethane)  
 #N Geom=AllCheck Guess=TCheck SCRF=Check Test GenChk  
 RM062X/6-31G(d) Freq

-----  
 Pointgroup= C1 Stoichiometry= C35H30BrF3N2O2S  
 C1[X(C35H30BrF3N2O2S)] #Atoms= 74  
 Charge = 0 Multiplicity = 1  
 -----  
 SCF Energy= -4880.46341812 Predicted Change= -1.303582D-10  
 =====

Optimization completed. {Found 2 times}  
 Item Max Val. Criteria Pass? RMS Val. Criteria  
 Pass?  
 Force 0.00000 || 0.00045 [ YES ] 0.00000 || 0.00030 [ YES ]  
 Displ 0.00049 || 0.00180 [ YES ] 0.00049 || 0.00180 [ YES ]  
 -----

| Atomic Type | Coordinates (Angstroms) |           |           |
|-------------|-------------------------|-----------|-----------|
|             | X                       | Y         | Z         |
| N           | 3.229465                | 1.319421  | -0.311339 |
| C           | 4.157955                | 0.201223  | -0.465037 |
| C           | 3.394595                | -1.111601 | -0.618334 |
| C           | 4.342574                | -2.322945 | -0.571582 |
| C           | 5.561945                | -2.125102 | -1.478784 |
| C           | 3.620824                | -3.608947 | -0.982031 |
| C           | 2.263435                | -1.156006 | 0.437706  |
| C           | 2.784309                | -1.252052 | 1.866698  |
| N           | 1.367102                | -0.010221 | 0.236699  |
| C           | -0.274848               | -0.285000 | 1.027091  |
| C           | -1.103686               | -1.150458 | 0.017041  |
| C           | -0.571543               | -2.188973 | -0.936274 |
| O           | -0.069201               | -0.519790 | 2.199454  |
| C           | 1.910495                | 1.139065  | -0.008641 |
| S           | 1.068743                | 2.698489  | 0.071870  |
| C           | 2.569205                | 3.541775  | -0.292771 |
| C           | 3.629502                | 2.647953  | -0.458378 |
| C           | 2.765239                | 4.910429  | -0.418655 |
| C           | 4.049194                | 5.372508  | -0.703305 |
| C           | 5.109062                | 4.477574  | -0.857825 |
| C           | 4.914703                | 3.103197  | -0.737126 |
| C           | 2.928922                | -2.518857 | 2.438812  |
| C           | 3.445774                | -2.672693 | 3.722586  |
| C           | 3.821136                | -1.553450 | 4.461218  |
| C           | 3.669378                | -0.285179 | 3.906042  |
| C           | 3.153569                | -0.135374 | 2.620808  |
| C           | -0.888837               | -3.525409 | -0.657659 |
| C           | -0.431461               | -4.563832 | -1.464809 |
| C           | 0.346777                | -4.283265 | -2.583808 |
| C           | 0.670535                | -2.959545 | -2.874049 |
| C           | 0.225266                | -1.923607 | -2.058206 |
| C           | -1.761845               | 0.207263  | -0.356347 |
| C           | -1.544151               | 0.807602  | -1.743161 |
| F           | -2.132151               | 2.008630  | -1.826247 |
| F           | -2.069288               | 0.024539  | -2.695849 |
| F           | -0.251821               | 0.999736  | -2.043162 |
| C           | -3.246407               | 0.263721  | -0.051413 |
| O           | -0.979899               | 0.921692  | 0.599695  |
| C           | -4.108851               | -0.675497 | -0.619610 |
| C           | -5.472530               | -0.631863 | -0.351382 |
| C           | -5.959680               | 0.361657  | 0.491549  |
| Br          | -7.816345               | 0.421178  | 0.873192  |
| C           | -5.116953               | 1.304917  | 1.066623  |
| C           | -3.754077               | 1.252467  | 0.787329  |
| H           | -1.821492               | -1.659790 | 0.667025  |

|   |           |           |           |
|---|-----------|-----------|-----------|
| H | 4.761903  | 0.399036  | -1.354182 |
| H | 4.824399  | 0.168891  | 0.407931  |
| H | 4.702689  | -2.429798 | 0.459889  |
| H | 6.211769  | -1.313672 | -1.137640 |
| H | 5.249356  | -1.905675 | -2.507279 |
| H | 6.163715  | -3.038658 | -1.501109 |
| H | 4.272237  | -4.474246 | -0.824502 |
| H | 3.360396  | -3.571807 | -2.045884 |
| H | 2.692117  | -3.782941 | -0.429209 |
| H | 2.899278  | -1.104881 | -1.600582 |
| H | 1.654909  | -2.044104 | 0.251409  |
| H | 1.938657  | 5.602390  | -0.294845 |
| H | 4.223030  | 6.438630  | -0.801875 |
| H | 6.103612  | 4.853373  | -1.073915 |
| H | 5.742040  | 2.411039  | -0.850591 |
| H | 2.624985  | -3.397725 | 1.874734  |
| H | 3.546191  | -3.666818 | 4.147447  |
| H | 4.220759  | -1.667555 | 5.464022  |
| H | 3.944831  | 0.595832  | 4.477633  |
| H | 3.019718  | 0.867639  | 2.225902  |
| H | -1.504856 | -3.754942 | 0.207901  |
| H | -0.692203 | -5.589146 | -1.221173 |
| H | 0.700134  | -5.086728 | -3.222729 |
| H | 1.281255  | -2.726266 | -3.741626 |
| H | 0.508788  | -0.909296 | -2.302587 |
| H | -3.714981 | -1.452767 | -1.269666 |
| H | -6.147320 | -1.361864 | -0.784255 |
| H | -5.518431 | 2.066403  | 1.725721  |
| H | -3.076266 | 1.972451  | 1.233096  |

-----  
 Statistical Thermodynamic Analysis

Temperature= 298.150 Kelvin Pressure= 1.00000 Atm  
 =====

SCF Energy= -4880.46341812 Predicted Change= -1.303582D-10  
 Zero-point correction (ZPE)= -4879.8789 0.58451  
 Internal Energy (U)= -4879.8417 0.62164  
 Enthalpy (H)= -4879.8408 0.62258  
 Gibbs Free Energy (G)= -4879.9502 0.51313  
 -----

Frequencies -- -157.8353 16.9452 18.0468

183.15K thermal correction = 0.550059

Single point SCF = -4883.513988

**H: Minor Product**

-----  
 Using Gaussian 09: AM64L-G09RevD.01 24-Apr-2013  
 =====

#m062X/6-31G(d) scf=(direct,tight,maxcycle=300,xqc)  
 SCRF=(PCM,SOLVENT=CH2Cl2) opt=(maxcycle=250,gdiis)  
 iop(1/8=18)  
 freq=norman temp=298.15  
 #N Geom=AllCheck Guess=TCheck SCRF=Check Test GenChk  
 RM062X/6-31G(d) Freq

-----  
 Pointgroup= C1 Stoichiometry= C16H10BrF3O2

C1[X(C16H10BrF3O2)] #Atoms= 32

Charge = 0 Multiplicity = 1  
 -----

SCF Energy= -3637.08627199 Predicted Change= -1.114704D-08  
 =====

Optimization completed. {Found 1 times}

```

Item Max Val. Criteria Pass? RMS Val. Criteria
Pass?
Force 0.00002 || 0.00045 [ YES ] 0.00000 || 0.00030 [
YES ]
Displ 0.00209 || 0.00180 [ NO ] 0.00209 || 0.00180 [
YES ]

```

| Atomic Type | Coordinates (Angstroms) |           |           |
|-------------|-------------------------|-----------|-----------|
|             | X                       | Y         | Z         |
| C           | -1.989676               | -1.709437 | -1.394624 |
| C           | -1.714521               | -0.253184 | -1.047770 |
| C           | -2.839855               | 0.669177  | -0.668318 |
| O           | -2.737302               | -2.332919 | -2.077058 |
| C           | -4.108105               | 0.182060  | -0.346761 |
| C           | -5.126473               | 1.062551  | 0.007953  |
| C           | -4.885570               | 2.433730  | 0.048328  |
| C           | -3.623894               | 2.925908  | -0.279882 |
| C           | -2.608833               | 2.047180  | -0.643889 |
| H           | -1.106234               | 0.188185  | -1.845045 |
| H           | -4.304089               | -0.885302 | -0.382426 |
| H           | -6.110363               | 0.674386  | 0.251554  |
| H           | -5.680963               | 3.117763  | 0.326958  |
| H           | -3.431670               | 3.993891  | -0.261673 |
| H           | -1.631572               | 2.434710  | -0.921633 |
| C           | -0.742631               | -0.903159 | -0.011795 |
| C           | -1.267272               | -0.916768 | 1.421306  |
| F           | -1.299075               | 0.322624  | 1.922345  |
| F           | -0.486660               | -1.664214 | 2.205170  |
| F           | -2.503711               | -1.424209 | 1.478553  |
| C           | 0.708851                | -0.516493 | -0.062074 |
| O           | -1.006478               | -2.210027 | -0.577677 |
| C           | 1.685041                | -1.479111 | -0.309489 |
| C           | 3.029277                | -1.119515 | -0.340825 |
| C           | 3.379132                | 0.206734  | -0.118203 |
| Br          | 5.207211                | 0.702386  | -0.152098 |
| C           | 2.417483                | 1.180181  | 0.133011  |
| C           | 1.077754                | 0.811370  | 0.161375  |
| H           | 1.396694                | -2.510180 | -0.484107 |
| H           | 3.794675                | -1.862882 | -0.532865 |
| H           | 2.711126                | 2.209637  | 0.303797  |
| H           | 0.320998                | 1.564682  | 0.362097  |

Statistical Thermodynamic Analysis  
Temperature= 298.150 Kelvin Pressure= 1.00000 Atm

```

SCF Energy= -3637.08627199 Predicted Change= -
1.114704D-08
Zero-point correction (ZPE)= -3636.8576 0.22859
Internal Energy (U)= -3636.8396 0.24661
Enthalpy (H)= -3636.8387
0.24755
Gibbs Free Energy (G)= -3636.9065
0.17971

```

Frequencies -- 28.4101 34.3366 46.9163

183.15K thermal correction = 0.203346  
Single point SCF = -3639.842206

## Alternative Mechanisms: PBE

### Alt 1: [2+2] $\beta$ -lactone formation TS

Using Gaussian 09: AM64L-G09RevD.01 24-Apr-2013

```

# pbepbe/6-31G(d)/auto gfpint gfinput
scf=(direct,tight,maxcycle=300,xqc)
opt=(maxcycle=250,calcfc,ts,noeigentest) freq=norman
SCRF=(PCM,SOLVENT=Dichloromethane) iop(1/8=18)
Temperature=298.15
#N Geom=AllCheck Guess=TChek SCRF=Check Test GenChk
RPBEPBE/6-31G(d)/Auto
Freq

```

```

Pointgroup= C1 Stoichiometry= C16H10BrF3O2
C1[X(C16H10BrF3O2)] #Atoms= 32
Charge= 0 Multiplicity= 1
SCF Energy= -3635.76594985 Predicted Change= -4.566671D-
10

```

```

Optimization completed. {Found 2 times}
Item Max Val. Criteria Pass? RMS Val. Criteria
Pass?
Force 0.00000 || 0.00045 [ YES ] 0.00000 || 0.00030 [
YES ]
Displ 0.00030 || 0.00180 [ YES ] 0.00030 || 0.00180 [
YES ]

```

| Atomic Type | Coordinates (Angstroms) |           |           |
|-------------|-------------------------|-----------|-----------|
|             | X                       | Y         | Z         |
| C           | -2.384868               | -0.261640 | 0.424416  |
| H           | -1.401664               | -0.650680 | 0.160364  |
| C           | -3.540922               | -1.072270 | 0.089831  |
| C           | -2.468309               | 0.866985  | 1.231495  |
| O           | -3.252201               | 1.569089  | 1.816413  |
| C           | -4.878858               | -0.709187 | 0.405911  |
| H           | -5.065320               | 0.216310  | 0.958446  |
| C           | -5.947892               | -1.524177 | 0.024790  |
| H           | -6.969859               | -1.224646 | 0.280967  |
| C           | -5.723641               | -2.719786 | -0.679997 |
| H           | -6.565991               | -3.354009 | -0.974384 |
| C           | -4.407460               | -3.095552 | -0.998536 |
| H           | -4.218536               | -4.025234 | -1.545830 |
| C           | -3.332623               | -2.290322 | -0.614572 |
| H           | -2.308458               | -2.589537 | -0.865870 |
| C           | -0.155210               | 1.420681  | 0.402158  |
| C           | -0.689022               | 2.346445  | -0.708397 |
| F           | -1.867952               | 2.912275  | -0.387175 |
| F           | -0.826981               | 1.694034  | -1.892185 |
| F           | 0.206311                | 3.359465  | -0.908025 |
| C           | 1.147871                | 0.802367  | 0.261292  |
| O           | -0.814572               | 1.283918  | 1.503819  |
| C           | 1.595350                | -0.054418 | 1.306000  |
| H           | 0.950220                | -0.212112 | 2.173944  |
| C           | 2.832355                | -0.687401 | 1.231317  |
| H           | 3.172013                | -1.343585 | 2.036428  |
| C           | 3.639487                | -0.475193 | 0.099955  |
| Br          | 5.326503                | -1.339070 | -0.013738 |
| C           | 3.222863                | 0.358296  | -0.952705 |
| H           | 3.864971                | 0.506008  | -1.824393 |
| C           | 1.986083                | 0.993372  | -0.872767 |
| H           | 1.675585                | 1.639719  | -1.695392 |

Statistical Thermodynamic Analysis  
Temperature= 298.150 Kelvin Pressure= 1.00000 Atm

```

SCF Energy= -3635.76594985 Predicted Change= -
4.566671D-10
Zero-point correction (ZPE)= -3635.5510 0.21490
Internal Energy (U)= -3635.5315 0.23438

```

Enthalpy (H)= -3635.5306  
 0.23532  
 Gibbs Free Energy (G)= -3635.6025  
 0.16337

-----  
 Frequencies -- -199.1147 14.1523 29.9279

183.15K thermal correction = 0.188402  
 Single point SCF = -3638.534496

**Alt 2: N,N-diisopropylethylamine catalyst/ketone TS**

Using Gaussian 09: AM64L-G09RevD.01 24-Apr-2013

=====  
 # pbepbe/6-31G(d)/auto scf=(maxcycle=300,direct,tight,xqc)  
 density=current  
 opt=(maxcycle=250,modredundant)  
 SCRF=(PCM,SOLVENT=Dichloromethane)  
 iop(1/8=18) Temperature=298.15  
 Modredundant Input: B 1 44 F  
 Modredundant Input:  
 # pbepbe/6-31G(d)/auto scf=(direct,tight,maxcycle=300,xqc)  
 opt=(nofreeze,maxcycle=250,ts,calcf, noeigentest) iop(1/8=18)  
 freq=norman  
 SCRF=(PCM,SOLVENT=Dichloromethane)  
 Temperature=298.15 geom=check  
 guess=read  
 #N Geom=AllCheck Guess=TCheck SCRF=Check Test GenChk  
 RPBEPBE/6-31G(d)/Auto  
 Freq

-----  
 Pointgroup= C1 Stoichiometry= C24H29BrF3NO2  
 C1[X(C24H29BrF3NO2)] #Atoms= 60  
 Charge = 0 Multiplicity = 1

-----  
 SCF Energy= -4006.28947729 Predicted Change= -6.498281D-08

=====  
 Optimization completed. {Found 2 times}  
 Item Max Val. Criteria Pass? RMS Val. Criteria  
 Pass?  
 Force 0.00002 || 0.00045 [ YES ] 0.00000 || 0.00030 [ YES ]  
 Displ 0.02980 || 0.00180 [ NO ] 0.02980 || 0.00180 [ NO ]

-----

| Atomic Type | Coordinates (Angstroms) |           |           |
|-------------|-------------------------|-----------|-----------|
|             | X                       | Y         | Z         |
| C           | -1.072865               | 0.772753  | 0.280972  |
| H           | -1.907301               | 1.109742  | 0.904551  |
| C           | -0.586919               | 1.944216  | -0.547794 |
| C           | -1.457606               | -0.404478 | -0.547250 |
| N           | -3.028652               | -0.997977 | -0.440769 |
| C           | -3.548264               | -0.758792 | 0.971807  |
| H           | -2.733825               | -1.092687 | 1.641147  |
| C           | -4.912268               | -1.348977 | 1.323111  |
| H           | -5.177467               | -0.964283 | 2.322521  |
| H           | -4.911158               | -2.446568 | 1.387821  |
| H           | -5.712884               | -1.034688 | 0.632639  |
| H           | -3.609832               | 0.330205  | 1.088580  |
| C           | -2.917361               | -2.512557 | -0.802009 |
| H           | -2.178161               | -2.507006 | -1.615115 |
| C           | -4.202498               | -3.157771 | -1.340702 |
| H           | -3.963959               | -4.220785 | -1.514894 |
| H           | -4.532120               | -2.745579 | -2.306935 |
| H           | -5.044828               | -3.124953 | -0.634729 |

|    |           |           |           |
|----|-----------|-----------|-----------|
| C  | -2.313554 | -3.315458 | 0.356790  |
| H  | -1.469819 | -2.782458 | 0.827600  |
| H  | -1.951415 | -4.272499 | -0.054718 |
| H  | -3.057349 | -3.551978 | 1.135777  |
| C  | -3.880409 | -0.241261 | -1.505552 |
| C  | -4.181167 | 1.219141  | -1.142542 |
| H  | -4.792169 | 1.330335  | -0.234084 |
| H  | -4.769358 | 1.640516  | -1.974580 |
| H  | -3.269656 | 1.831355  | -1.046716 |
| H  | -4.833224 | -0.793001 | -1.503737 |
| C  | -3.265128 | -0.312963 | -2.910756 |
| H  | -4.023099 | 0.051471  | -3.623247 |
| H  | -2.982627 | -1.329989 | -3.219394 |
| H  | -2.379990 | 0.337223  | -3.002923 |
| O  | -0.763542 | -0.976888 | -1.347584 |
| C  | 0.240376  | 1.815237  | -1.685735 |
| H  | 0.550947  | 0.821947  | -2.019192 |
| C  | 0.666689  | 2.948563  | -2.393021 |
| H  | 1.305946  | 2.822138  | -3.273393 |
| C  | 0.284362  | 4.233517  | -1.980527 |
| H  | 0.619894  | 5.115677  | -2.535593 |
| C  | -0.536413 | 4.376486  | -0.850979 |
| H  | -0.846455 | 5.372457  | -0.517152 |
| C  | -0.970473 | 3.245660  | -0.147922 |
| H  | -1.606340 | 3.369017  | -2.32923  |
| C  | -0.065978 | 0.013698  | 1.480334  |
| C  | 1.351310  | -0.201674 | 0.895618  |
| C  | -0.022391 | 1.054229  | 2.653092  |
| F  | 0.447316  | 2.305529  | 2.329212  |
| F  | 0.764720  | 0.592373  | 3.661571  |
| F  | -1.269609 | 1.248647  | 3.176114  |
| O  | -0.670840 | -1.083400 | 1.895489  |
| C  | 2.265379  | 0.819120  | 0.559579  |
| H  | 2.000772  | 1.868936  | 0.697682  |
| C  | 3.539021  | 0.513172  | 0.057088  |
| H  | 4.242462  | 1.311582  | -0.195317 |
| C  | 3.897696  | -0.828503 | -0.116101 |
| Br | 5.638620  | -1.253795 | -0.807943 |
| C  | 3.017945  | -1.866019 | 0.214234  |
| H  | 3.318441  | -2.909709 | 0.084871  |
| C  | 1.755147  | -1.538312 | 0.723040  |
| H  | 1.048868  | -2.318560 | 1.022025  |

-----  
 Statistical Thermodynamic Analysis

Temperature= 298.150 Kelvin Pressure= 1.00000 Atm

=====  
 SCF Energy= -4006.28947729 Predicted Change= -6.498281D-08

Zero-point correction (ZPE)= -4005.8122 0.47720

Internal Energy (U)= -4005.7807 0.50877

Enthalpy (H)= -4005.7797

0.50971

Gibbs Free Energy (G)= -4005.8765

0.41294

-----  
 Frequencies -- -156.9751 2.1905 25.5969

183.15K thermal correction = 0.445777

Single point SCF = -4009.157805

**Alt 3: HBTM-ketone/ketene TS**

Using Gaussian 09: AM64L-G09RevD.01 24-Apr-2013

=====  
 # pbepbe/6-31G(d)/auto scf=(maxcycle=300,direct,tight,xqc)  
 density=current

opt=(maxcycle=250,modredundant)  
 SCRF=(PCM,SOLVENT=Dichloromethane)  
 iop(1/8=18) Temperature=298.15  
 Modredundant Input: B 24 62 F  
 Modredundant Input:  
 # pbepbe/6-31G(d)/auto scf=(direct,tight,maxcycle=300,xqc)  
 opt=(nofreeze,maxcycle=250,ts,calcfc,noieigentest) iop(1/8=18)  
 freq=noraman  
 SCRF=(PCM,SOLVENT=Dichloromethane)  
 Temperature=298.15 geom=check  
 guess=read  
 #N Geom=AllCheck Guess=TCheck SCRF=Check Test GenChk  
 RPBEPBE/6-31G(d)/Auto  
 Freq

-----  
 Pointgroup= C1 Stoichiometry= C35H30BrF3N2O2S  
 C1[X(C35H30BrF3N2O2S)] #Atoms= 74  
 Charge = 0 Multiplicity = 1  
 -----  
 SCF Energy= -4878.29366039 Predicted Change= -2.013965D-09

=====  
 Optimization completed on the basis of negligible forces.  
 {Found 3 times}  
 Item Max Val. Criteria Pass? RMS Val. Criteria  
 Pass?  
 Force 0.00000 || 0.00045 [ YES ] 0.00000 || 0.00030 [ YES ]  
 Displ 0.00430 || 0.00180 [ NO ] 0.00430 || 0.00180 [ YES ]  
 -----

| Atomic Type | Coordinates (Angstroms) |           |           |
|-------------|-------------------------|-----------|-----------|
|             | X                       | Y         | Z         |
| C           | 6.451511                | -2.995958 | -0.895203 |
| C           | 5.909078                | -1.796483 | -0.414833 |
| C           | 4.511000                | -1.694037 | -0.340140 |
| C           | 3.682581                | -2.762489 | -0.722677 |
| C           | 4.230022                | -3.964046 | -1.190038 |
| C           | 5.624687                | -4.067562 | -1.281460 |
| N           | 3.760578                | -0.594251 | 0.113102  |
| C           | 2.409874                | -0.768014 | 0.103546  |
| S           | 1.970226                | -2.386707 | -0.461975 |
| C           | 4.399027                | 0.644893  | 0.579074  |
| C           | 3.493561                | 1.841031  | 0.292705  |
| C           | 3.591618                | 2.370186  | -1.169725 |
| C           | 4.979341                | 2.993062  | -1.422835 |
| C           | 3.250147                | 1.360530  | -2.280853 |
| C           | 2.085248                | 1.526458  | 0.898924  |
| C           | 1.165326                | 2.735651  | 0.768578  |
| N           | 1.526607                | 0.205430  | 0.418009  |
| C           | 0.076381                | -0.323222 | 0.911392  |
| C           | -1.028857               | 0.598873  | 0.382732  |
| C           | 0.195641                | -0.369675 | 2.483295  |
| F           | 0.329355                | 0.845380  | 3.101936  |
| F           | 1.270285                | -1.115425 | 2.846034  |
| F           | -0.911259               | -0.949538 | 3.016770  |
| O           | -0.069645               | -1.590466 | 0.508428  |
| C           | 0.581055                | 3.154811  | -0.443196 |
| C           | -0.149668               | 4.348672  | -0.509787 |
| C           | -0.292241               | 5.157449  | 0.628148  |
| C           | 0.295108                | 4.758309  | 1.836646  |
| C           | 1.013708                | 3.556232  | 1.903549  |
| C           | -1.932064               | 1.296975  | 1.202331  |
| C           | -2.995665               | 2.021478  | 0.643937  |
| C           | -3.155144               | 2.038308  | -0.744469 |
| Br          | -4.594652               | 3.040075  | -1.514811 |
| C           | -2.280021               | 1.338105  | -1.585472 |
| C           | -1.225463               | 0.621528  | -1.013063 |

|   |           |           |           |
|---|-----------|-----------|-----------|
| H | 7.538715  | -3.096974 | -0.962256 |
| H | 6.565402  | -0.981607 | -0.099486 |
| H | 3.583455  | -4.797735 | -1.480384 |
| H | 6.072933  | -4.993342 | -1.654170 |
| H | 5.357113  | 0.745140  | 0.049201  |
| H | 4.617241  | 0.544400  | 1.656731  |
| H | 4.991740  | 3.496530  | -2.404656 |
| H | 5.785230  | 2.236416  | -1.440309 |
| H | 5.234210  | 3.744785  | -0.655233 |
| H | 2.865618  | 3.199729  | -1.236421 |
| H | 3.265851  | 1.870045  | -3.259842 |
| H | 2.248798  | 0.914422  | -2.156258 |
| H | 3.985670  | 0.537905  | -2.334153 |
| H | 3.860613  | 2.664268  | 0.933118  |
| H | 2.272094  | 1.395704  | 1.979692  |
| H | 0.668502  | 2.531902  | -1.336886 |
| H | -0.611813 | 4.645407  | -1.456929 |
| H | -0.861755 | 6.090920  | 0.572507  |
| H | 0.189511  | 5.377585  | 2.733404  |
| H | 1.462014  | 3.248685  | 2.854760  |
| H | -1.824765 | 1.297322  | 2.288487  |
| H | -3.690264 | 2.566492  | 1.288297  |
| H | -2.421441 | 1.351297  | -2.669398 |
| H | -0.551569 | 0.055939  | -1.662135 |
| C | -2.464479 | -2.658644 | 0.487578  |
| C | -3.732711 | -3.343133 | 0.245233  |
| C | -1.585769 | -2.399791 | -0.512807 |
| O | -1.242148 | -2.475210 | -1.661925 |
| C | -4.151059 | -3.808412 | -1.029706 |
| C | -5.378154 | -4.460173 | -1.194102 |
| C | -6.234175 | -4.673578 | -0.100160 |
| C | -5.836580 | -4.220231 | 1.168262  |
| C | -4.610521 | -3.567514 | 1.338899  |
| H | -2.214170 | -2.336883 | 1.496028  |
| H | -3.499874 | -3.653172 | -1.896696 |
| H | -5.670118 | -4.806417 | -2.192407 |
| H | -7.193496 | -5.184069 | -0.234509 |
| H | -6.487845 | -4.375378 | 2.036226  |
| H | -4.313800 | -3.218752 | 2.335392  |

-----  
 Statistical Thermodynamic Analysis  
 Temperature= 298.150 Kelvin Pressure= 1.00000 Atm  
 -----  
 SCF Energy= -4878.29366039 Predicted Change= -2.013965D-09  
 Zero-point correction (ZPE)= -4877.7345 0.55915  
 Internal Energy (U)= -4877.6946 0.59897  
 Enthalpy (H)= -4877.6937  
 0.59992  
 Gibbs Free Energy (G)= -4877.8106  
 0.48304  
 -----  
 Frequencies -- -61.6958 8.5901 11.5453  
 183.15K thermal correction = 0.522477  
 Single point SCF = -4881.322305

Stepwise Mechanism: B3LYP  
 SM: Phenylacetic anhydride

Using Gaussian 09: AM64L-G09RevD.01 24-Apr-2013

=====  
 # B3LYP/6-31G\* gfpinput  
 scf=(direct,tight,maxcycle=300,xqc)  
 opt=(maxcycle=250) freq=noraman iop(1/8=14)  
 Temperature=298.15  
 SCRF=(PCM,SOLVENT=Dichloromethane)

#N Geom=AllCheck Guess=TCheck SCRF=Check Test GenChk  
RB3LYP/6-31G(d) Freq

Pointgroup= C1 Stoichiometry= C16H14O3  
C1[X(C16H14O3)] #Atoms= 33  
Charge = 0 Multiplicity = 1

SCF Energy= -843.835296614 Predicted Change= -4.931914D-09

=====  
Optimization completed. {Found 1 times}  
Item Max Val. Criteria Pass? RMS Val. Criteria  
Pass?  
Force 0.00000 || 0.00045 [ YES ] 0.00000 || 0.00030 [ YES ]  
Displ 0.01005 || 0.00180 [ NO ] 0.01005 || 0.00180 [ NO ]

| Atomic Coordinates (Angstroms) |           |           |           |
|--------------------------------|-----------|-----------|-----------|
| Type                           | X         | Y         | Z         |
| C                              | 1.218493  | 0.040662  | 0.035879  |
| C                              | 2.310296  | 0.984756  | -0.434421 |
| C                              | 3.708843  | 0.450443  | -0.231246 |
| O                              | -0.000361 | 0.715010  | 0.021163  |
| C                              | -1.215211 | 0.036801  | -0.053720 |
| C                              | -2.306898 | 0.918933  | 0.524137  |
| C                              | -3.707259 | 0.409364  | 0.275391  |
| O                              | -1.334717 | -1.056358 | -0.534953 |
| O                              | 1.342462  | -1.095667 | 0.402294  |
| C                              | 4.263461  | -0.462348 | -1.137923 |
| C                              | 5.552652  | -0.960871 | -0.946690 |
| C                              | 6.306154  | -0.551224 | 0.156371  |
| C                              | 5.762540  | 0.359101  | 1.064839  |
| C                              | 4.471789  | 0.855750  | 0.870574  |
| C                              | -4.525788 | 1.019832  | -0.682063 |
| C                              | -5.821490 | 0.552386  | -0.914317 |
| C                              | -6.312857 | -0.534984 | -0.189815 |
| C                              | -5.503045 | -1.150650 | 0.768524  |
| C                              | -4.210126 | -0.680159 | 0.999255  |
| H                              | 2.166481  | 1.941686  | 0.079284  |
| H                              | 2.108966  | 1.183969  | -1.495887 |
| H                              | -2.169027 | 1.927929  | 0.120427  |
| H                              | -2.096731 | 0.999201  | 1.599844  |
| H                              | 3.683369  | -0.783263 | -1.999885 |
| H                              | 5.969418  | -1.666578 | -1.660217 |
| H                              | 7.311235  | -0.936653 | 0.304457  |
| H                              | 6.342575  | 0.685849  | 1.923713  |
| H                              | 4.054915  | 1.566511  | 1.580495  |
| H                              | -4.148566 | 1.868395  | -1.248142 |
| H                              | -6.445225 | 1.039292  | -1.659106 |
| H                              | -7.320998 | -0.899269 | -0.367757 |
| H                              | -5.879297 | -1.995906 | 1.338429  |
| H                              | -3.585509 | -1.161791 | 1.747659  |

=====  
Statistical Thermodynamic Analysis  
Temperature= 298.150 Kelvin Pressure= 1.00000 Atm

=====  
SCF Energy= -843.835296614 Predicted Change= -4.931914D-09  
Zero-point correction (ZPE)= -843.5733 0.26190  
Internal Energy (U)= -843.5566 0.27865  
Enthalpy (H)= -843.5557 0.27959  
Gibbs Free Energy (G)= -843.6244 0.21087

=====  
Frequencies -- 6.7021 14.5331 21.1244

183.15K thermal correction = 0.235085  
Single point SCF = -844.113666

### TS-I-(Re,Si): C-C bond formation

Using Gaussian 09: AM64L-G09RevD.01 24-Apr-2013

=====  
# B3LYP/6-31G(d) scf=(maxcycle=300,direct,tight,xqc)  
density=current  
opt=(maxcycle=250,modredundant)  
SCRF=(PCM,SOLVENT=CH2Cl2) iop(1/8=18)  
Temperature=298.15  
Modredundant Input: B 9 61 F  
Modredundant Input:  
# B3LYP/6-31G(d) scf=(direct,tight,maxcycle=300,xqc)  
opt=(nofreeze,maxcycle=250,ts,calcf, noeigentest) iop(1/8=18)  
freq=noraman  
SCRF=(PCM,SOLVENT=CH2Cl2) Temperature=298.15  
geom=check guess=read  
#N Geom=AllCheck Guess=TCheck SCRF=Check Test GenChk  
RB3LYP/6-31G(d) Freq

=====  
Pointgroup= C1 Stoichiometry= C35H30BrF3N2O2S  
C1[X(C35H30BrF3N2O2S)] #Atoms= 74  
Charge = 0 Multiplicity = 1

SCF Energy= -4881.15710620 Predicted Change= -1.297977D-08

=====  
Optimization completed. {Found 3 times}  
Item Max Val. Criteria Pass? RMS Val. Criteria  
Pass?  
Force 0.00002 || 0.00045 [ YES ] 0.00000 || 0.00030 [ YES ]  
Displ 0.00156 || 0.00180 [ YES ] 0.00156 || 0.00180 [ YES ]

| Atomic Coordinates (Angstroms) |           |           |           |
|--------------------------------|-----------|-----------|-----------|
| Type                           | X         | Y         | Z         |
| C                              | -2.191463 | -3.462813 | 3.206702  |
| C                              | -1.407878 | -2.991189 | 2.155666  |
| C                              | -1.470235 | -1.648448 | 1.733382  |
| C                              | -2.359116 | -0.793730 | 2.412126  |
| C                              | -3.139721 | -1.265496 | 3.470048  |
| C                              | -3.064328 | -2.599253 | 3.874214  |
| H                              | -2.115230 | -4.504592 | 3.508305  |
| H                              | -0.729239 | -3.673581 | 1.649583  |
| C                              | -0.589563 | -1.227383 | 0.596447  |
| H                              | -2.430111 | 0.245144  | 2.119400  |
| H                              | -3.814288 | -0.580829 | 3.978592  |
| H                              | -3.674803 | -2.961380 | 4.697277  |
| C                              | 0.103724  | 0.052312  | 0.766168  |
| N                              | 1.422044  | 0.205338  | 0.191980  |
| C                              | 2.080515  | 1.368416  | 0.384893  |
| N                              | 3.313830  | 1.591323  | -0.108067 |
| C                              | 4.003146  | 0.661362  | -1.021523 |
| C                              | 2.979772  | -0.259367 | -1.676541 |
| C                              | 2.081441  | -0.895910 | -0.584663 |
| H                              | 4.757635  | 0.103973  | -0.455593 |
| H                              | 4.510241  | 1.276671  | -1.764594 |
| C                              | 3.629101  | -1.304936 | -2.622768 |
| H                              | 2.307796  | 0.365036  | -2.280170 |
| C                              | 2.762697  | -1.898589 | 0.338993  |
| H                              | 1.258524  | -1.357446 | -1.125123 |
| O                              | -0.360371 | 1.039498  | 1.332607  |

|    |           |           |           |
|----|-----------|-----------|-----------|
| H  | 0.104386  | -2.030434 | 0.371679  |
| C  | 3.511581  | -1.515752 | 1.461751  |
| C  | 4.140007  | -2.472343 | 2.261487  |
| C  | 4.028335  | -3.829516 | 1.954984  |
| C  | 3.274972  | -4.224634 | 0.848131  |
| C  | 2.644346  | -3.267522 | 0.051624  |
| H  | 3.598017  | -0.469313 | 1.739199  |
| H  | 4.712041  | -2.153309 | 3.128199  |
| H  | 4.515332  | -4.572974 | 2.579556  |
| H  | 3.167359  | -5.278571 | 0.607630  |
| H  | 2.040378  | -3.587721 | -0.792441 |
| S  | 1.471884  | 2.723059  | 1.316424  |
| C  | 2.993495  | 3.583022  | 1.043907  |
| C  | 3.871304  | 2.827711  | 0.261113  |
| C  | 5.140178  | 3.307665  | -0.072725 |
| C  | 5.497692  | 4.571253  | 0.393189  |
| C  | 4.616301  | 5.335878  | 1.171964  |
| C  | 3.353897  | 4.848858  | 1.506400  |
| H  | 5.833023  | 2.720723  | -0.664637 |
| H  | 6.478802  | 4.965727  | 0.148548  |
| H  | 4.920106  | 6.317429  | 1.521815  |
| H  | 2.670515  | 5.436263  | 2.111268  |
| C  | 2.572822  | -1.981068 | -3.515054 |
| H  | 4.105932  | -2.073665 | -2.001038 |
| C  | 4.721476  | -0.685527 | -3.514159 |
| H  | 2.140237  | -1.254337 | -4.213682 |
| H  | 1.743870  | -2.418677 | -2.953128 |
| H  | 3.037706  | -2.777974 | -4.105890 |
| H  | 5.584979  | -0.331078 | -2.941178 |
| H  | 4.329027  | 0.155918  | -4.099330 |
| H  | 5.090132  | -1.435920 | -4.221714 |
| C  | -2.555508 | 1.161236  | -1.339775 |
| H  | -1.620935 | 1.519607  | -1.756624 |
| C  | -2.627457 | -0.184963 | -0.954872 |
| C  | -1.354061 | -1.012335 | -1.159253 |
| C  | -3.844138 | -0.665829 | -0.447609 |
| H  | -3.945506 | -1.699757 | -0.144637 |
| C  | -4.956587 | 0.171072  | -0.332760 |
| H  | -5.894888 | -0.214679 | 0.051530  |
| C  | -4.844926 | 1.504716  | -0.714199 |
| Br | -6.370294 | 2.661945  | -0.553769 |
| C  | -3.650034 | 2.014701  | -1.217767 |
| H  | -3.578783 | 3.054601  | -1.519055 |
| C  | -1.632897 | -2.497251 | -1.535663 |
| F  | -2.386150 | -3.216695 | -0.663386 |
| F  | -0.470487 | -3.189495 | -1.677688 |
| F  | -2.267129 | -2.557973 | -2.729611 |
| O  | -0.469962 | -0.510387 | -1.946231 |

-----  
Statistical Thermodynamic Analysis  
Temperature= 298.150 Kelvin Pressure= 1.00000 Atm  
=====

SCF Energy= -4881.15710620 Predicted Change= -1.297977D-08  
Zero-point correction (ZPE)= -4880.5796 0.57746  
Internal Energy (U)= -4880.5416 0.61549  
Enthalpy (H)= -4880.5406 0.61643  
Gibbs Free Energy (G)= -4880.6521 0.50496  
-----  
Frequencies -- -184.7330 11.9192 21.0829

183.15K thermal correction = 0.542559  
Single point SCF = -4884.241838

**TS-I(Re,Re): C-C bond formation**  
-----

Using Gaussian 09: AM64L-G09RevD.01 24-Apr-2013  
=====

```
# B3LYP/6-31G(d) scf=(maxcycle=300,direct,tight,xqc)
density=current
opt=(maxcycle=250,modredundant)
SCRF=(PCM,SOLVENT=CH2Cl2) iop(1/8=18)
Temperature=298.15
Modredundant Input: B 11 58 F
Modredundant Input:
# B3LYP/6-31G(d) scf=(direct,tight,maxcycle=300,xqc)
opt=(nofreeze,maxcycle=250,ts,calcf, noeigentest) iop(1/8=18)
freq=norman
SCRF=(PCM,SOLVENT=CH2Cl2) Temperature=298.15
geom=check guess=read
#N Geom=AllCheck Guess=TCheck SCRF=Check Test GenChk
RB3LYP/6-31G(d) Freq
```

-----  
Pointgroup= C1 Stoichiometry= C35H30BrF3N2O2S  
C1[X(C35H30BrF3N2O2S)] #Atoms= 74  
Charge = 0 Multiplicity = 1  
-----

SCF Energy= -4881.15530347 Predicted Change= -5.351702D-09  
=====

```
Optimization completed. {Found 3 times}
Item Max Val. Criteria Pass? RMS Val. Criteria
Pass?
Force 0.00001 || 0.00045 [ YES ] 0.00000 || 0.00030 [
YES ]
Displ 0.00114 || 0.00180 [ YES ] 0.00114 || 0.00180 [
YES ]
```

-----  
Atomic Coordinates (Angstroms)  
Type X Y Z  
-----

|   |           |           |           |
|---|-----------|-----------|-----------|
| N | -4.154099 | 0.109123  | -0.240554 |
| C | -4.054866 | 1.547288  | -0.543745 |
| C | -2.652747 | 1.865954  | -1.052320 |
| C | -2.454892 | 3.376292  | -1.354601 |
| C | -3.661147 | 3.992806  | -2.085900 |
| C | -1.183539 | 3.613186  | -2.188466 |
| C | -1.601592 | 1.292057  | -0.065979 |
| C | -1.535810 | 1.965185  | 1.299998  |
| N | -1.829596 | -0.185696 | 0.068338  |
| C | -0.742699 | -1.107270 | 0.336809  |
| C | 0.624235  | -0.579771 | 0.455008  |
| H | 0.627176  | 0.471310  | 0.725032  |
| C | 1.510515  | -1.328268 | 1.408155  |
| O | -1.053636 | -2.292702 | 0.434261  |
| C | -3.083974 | -0.677067 | -0.013014 |
| S | -3.519455 | -2.365091 | 0.183667  |
| C | -5.224386 | -1.940915 | -0.024081 |
| C | -5.385512 | -0.568569 | -0.234392 |
| C | -6.326589 | -2.795043 | 0.008890  |
| C | -7.593532 | -2.241287 | -0.167943 |
| C | -7.751875 | -0.862347 | -0.370642 |
| C | -6.653017 | -0.006068 | -0.405789 |
| C | -0.593418 | 2.986404  | 1.499684  |
| C | -0.505150 | 3.652834  | 2.722597  |
| C | -1.353321 | 3.301628  | 3.774544  |
| C | -2.284724 | 2.277884  | 3.594103  |
| C | -2.373891 | 1.614405  | 2.368435  |
| C | 2.287754  | -0.575126 | 2.308064  |
| C | 3.152566  | -1.186997 | 3.214698  |
| C | 3.260684  | -2.578809 | 3.250237  |
| C | 2.495819  | -3.341718 | 2.365205  |
| C | 1.634680  | -2.729165 | 1.453336  |
| H | -4.304998 | 2.116963  | 0.358354  |

|    |           |           |           |
|----|-----------|-----------|-----------|
| H  | -4.805091 | 1.756381  | -1.306101 |
| H  | -2.347761 | 3.899839  | -0.396038 |
| H  | -4.569509 | 4.002915  | -1.474050 |
| H  | -3.880259 | 3.456392  | -3.018125 |
| H  | -3.438790 | 5.032423  | -2.349665 |
| H  | -0.995355 | 4.688146  | -2.286889 |
| H  | -1.308677 | 3.202739  | -3.198397 |
| H  | -0.292846 | 3.144855  | -1.762411 |
| H  | -2.508858 | 1.317399  | -1.993549 |
| H  | -0.637990 | 1.365645  | -0.578745 |
| H  | -6.199944 | -3.860774 | 0.170081  |
| H  | -8.466576 | -2.885800 | -0.144928 |
| H  | -8.747060 | -0.448899 | -0.499919 |
| H  | -6.787850 | 1.059567  | -0.551643 |
| H  | 0.081916  | 3.256596  | 0.692517  |
| H  | 0.233250  | 4.438784  | 2.854179  |
| H  | -1.282595 | 3.814543  | 4.729492  |
| H  | -2.941516 | 1.987260  | 4.409201  |
| H  | -3.092399 | 0.806479  | 2.265442  |
| H  | 2.209877  | 0.509456  | 2.295746  |
| H  | 3.737178  | -0.574692 | 3.896774  |
| H  | 3.930820  | -3.061451 | 3.956754  |
| H  | 2.569979  | -4.426537 | 2.379825  |
| H  | 1.054513  | -3.337711 | 0.774039  |
| C  | 1.330095  | -0.228028 | -1.300338 |
| C  | 0.948895  | -1.475545 | -2.143586 |
| F  | -0.376405 | -1.494368 | -2.408456 |
| F  | 1.245162  | -2.683566 | -1.591208 |
| F  | 1.584565  | -1.439293 | -3.340895 |
| C  | 2.840387  | -0.116401 | -1.044159 |
| O  | 0.759044  | 0.829677  | -1.758909 |
| C  | 3.730692  | -1.195842 | -0.948676 |
| C  | 5.094298  | -0.986741 | -0.735109 |
| C  | 5.569571  | 0.315030  | -0.604702 |
| Br | 7.444067  | 0.608691  | -0.304599 |
| C  | 4.711545  | 1.408529  | -0.693813 |
| C  | 3.355213  | 1.180217  | -0.920433 |
| H  | 3.375656  | -2.214253 | -1.040277 |
| H  | 5.774075  | -1.829414 | -0.669547 |
| H  | 5.095258  | 2.418804  | -0.598302 |
| H  | 2.668383  | 2.013253  | -1.021279 |

#### Statistical Thermodynamic Analysis

Temperature= 298.150 Kelvin Pressure= 1.00000 Atm

```

=====
SCF Energy= -4881.15530347 Predicted Change= -
5.351702D-09
Zero-point correction (ZPE)= -4880.5782 0.57709
Internal Energy (U)= -4880.5400 0.61524
Enthalpy (H)= -4880.5391
0.61618
Gibbs Free Energy (G)= -4880.6516
0.50367
=====

```

Frequencies -- -159.3080 9.7840 15.8161

183.15K thermal correction = 0.541664

Single point SCF = -4884.241314

#### TS-I-(Si,Re): C-C bond formation

Using Gaussian 09: AM64L-G09RevD.01 24-Apr-2013

```

=====
# B3LYP/6-31G(d) scf=(maxcycle=300,direct,tight,xqc)
density=current
opt=(maxcycle=250,modredundant)
SCRF=(PCM,SOLVENT=CH2Cl2) iop(1/8=18)
=====

```

```

Temperature=298.15
Modredundant Input: B 11 58 F
Modredundant Input:
# B3LYP/6-31G(d) scf=(direct,tight,maxcycle=300,xqc)
opt=(nofreeze,maxcycle=250,ts,calcfc,noeigentest) iop(1/8=18)
freq=norman
SCRF=(PCM,SOLVENT=CH2Cl2) Temperature=298.15
geom=check guess=read
#N Geom=AllCheck Guess=TCheck SCRF=Check Test GenChk
RB3LYP/6-31G(d) Freq
=====

```

```

Pointgroup= C1 Stoichiometry= C35H30BrF3N2O2S
C1[X(C35H30BrF3N2O2S)] #Atoms= 74
Charge = 0 Multiplicity = 1
=====

```

SCF Energy= -4881.14729205 Predicted Change= -1.013583D-09

```

=====
Optimization completed. {Found 3 times}
Item Max Val. Criteria Pass? RMS Val. Criteria
Pass?
Force 0.00000 || 0.00045 [ YES ] 0.00000 || 0.00030 [
YES ]
Displ 0.00124 || 0.00180 [ YES ] 0.00124 || 0.00180 [
YES ]
=====

```

Atomic Coordinates (Angstroms)

| Type | X         | Y         | Z         |
|------|-----------|-----------|-----------|
| N    | 4.153122  | 0.006380  | 0.149049  |
| C    | 4.230602  | 1.447668  | 0.447673  |
| C    | 3.035866  | 1.855502  | 1.306846  |
| C    | 3.019446  | 3.374539  | 1.623821  |
| C    | 4.394800  | 3.876683  | 2.100828  |
| C    | 1.961315  | 3.710514  | 2.689038  |
| C    | 1.732003  | 1.337675  | 0.632985  |
| C    | 1.388550  | 2.010956  | -0.691107 |
| N    | 1.825246  | -0.152938 | 0.524562  |
| C    | 0.692515  | -1.025875 | 0.859119  |
| C    | -0.668624 | -0.494279 | 0.736245  |
| H    | -0.691308 | 0.537269  | 0.394246  |
| C    | -1.493517 | -0.665051 | 1.981363  |
| O    | 0.968677  | -2.171993 | 1.182830  |
| C    | 3.028778  | -0.718164 | 0.306704  |
| S    | 3.305574  | -2.438370 | 0.130337  |
| C    | 4.987833  | -2.113721 | -0.307257 |
| C    | 5.279316  | -0.748242 | -0.223590 |
| C    | 5.974013  | -3.036280 | -0.654634 |
| C    | 7.253898  | -2.556908 | -0.930863 |
| C    | 7.540482  | -1.186278 | -0.853324 |
| C    | 6.559298  | -0.262231 | -0.498227 |
| C    | 0.467668  | 3.068734  | -0.689515 |
| C    | 0.157272  | 3.750877  | -1.867053 |
| C    | 0.761847  | 3.380933  | -3.069405 |
| C    | 1.668791  | 2.320236  | -3.085373 |
| C    | 1.977150  | 1.638462  | -1.907647 |
| C    | -1.633652 | -1.906458 | 2.625031  |
| C    | -2.411685 | -2.021444 | 3.778878  |
| C    | -3.067322 | -0.908806 | 4.311116  |
| C    | -2.942296 | 0.327739  | 3.673284  |
| C    | -2.163680 | 0.445534  | 2.521668  |
| H    | 4.270151  | 2.007256  | -0.492887 |
| H    | 5.166702  | 1.602417  | 0.984628  |
| H    | 2.767604  | 3.912755  | 0.701273  |
| H    | 4.745850  | 3.309821  | 2.972515  |
| H    | 4.321423  | 4.928155  | 2.397798  |
| H    | 5.160783  | 3.815577  | 1.320899  |
| H    | 0.945303  | 3.437868  | 2.388106  |
| H    | 1.961121  | 4.786860  | 2.890763  |



|    |           |           |           |
|----|-----------|-----------|-----------|
| H  | 2.180019  | 3.193889  | 3.631848  |
| H  | 3.120494  | 1.320575  | 2.263181  |
| H  | 0.916877  | 1.510724  | 1.334310  |
| H  | 5.749591  | -4.096294 | -0.713260 |
| H  | 8.036029  | -3.255324 | -1.211046 |
| H  | 8.542351  | -0.833111 | -1.075837 |
| H  | 6.786755  | 0.796618  | -0.449880 |
| H  | -0.016688 | 3.362324  | 0.238159  |
| H  | -0.560341 | 4.566040  | -1.842575 |
| H  | 0.520026  | 3.907478  | -3.988182 |
| H  | 2.131899  | 2.012038  | -4.018389 |
| H  | 2.653705  | 0.791429  | -1.958396 |
| H  | -1.140863 | -2.771349 | 2.202019  |
| H  | -2.508074 | -2.990420 | 4.263111  |
| H  | -3.669829 | -1.003821 | 5.210785  |
| H  | -3.448936 | 1.203065  | 4.072289  |
| H  | -2.074781 | 1.412764  | 2.031938  |
| C  | -1.497974 | -1.519089 | -0.592088 |
| C  | -2.933387 | -0.930820 | -0.624809 |
| C  | -0.725328 | -1.134438 | -1.888402 |
| F  | -0.685200 | 0.195130  | -2.178728 |
| F  | -1.287794 | -1.738298 | -2.961887 |
| F  | 0.567616  | -1.548946 | -1.846669 |
| O  | -1.402331 | -2.770467 | -0.351988 |
| C  | -3.266398 | 0.404178  | -0.897918 |
| C  | -4.597213 | 0.827592  | -0.908580 |
| C  | -5.603728 | -0.096293 | -0.639410 |
| Br | -7.437563 | 0.479492  | -0.651257 |
| C  | -5.306712 | -1.428437 | -0.364080 |
| C  | -3.971506 | -1.831100 | -0.361995 |
| H  | -2.496074 | 1.135275  | -1.113342 |
| H  | -4.843709 | 1.862361  | -1.122610 |
| H  | -6.101214 | -2.138574 | -0.158901 |
| H  | -3.700832 | -2.860765 | -0.156365 |

Statistical Thermodynamic Analysis

Temperature= 298.150 Kelvin Pressure= 1.00000 Atm

SCF Energy= -4881.14729205 Predicted Change= -1.013583D-09

Zero-point correction (ZPE)= -4880.5706 0.57668

Internal Energy (U)= -4880.5325 0.61478

Enthalpy (H)= -4880.5315

0.61572

Gibbs Free Energy (G)= -4880.6432

0.50402

Frequencies -- -61.6962 13.5944 15.6215

183.15K thermal correction = 0.541698

Single point SCF = -4884.234891

TS-I-(Si,Si): C-C bond formation

Using Gaussian 09: AM64L-G09RevD.01 24-Apr-2013

# B3LYP/6-31G(d) scf=(maxcycle=300,direct,tight,xqc)

density=current

opt=(maxcycle=250,modredundant)

SCRF=(PCM,SOLVENT=CH2Cl2) iop(1/8=18)

Temperature=298.15

Modredundant Input: B 11 58 F

Modredundant Input:

# B3LYP/6-31G(d) scf=(direct,tight,maxcycle=300,xqc)

opt=(nofreeze,maxcycle=250,ts,calcf, noigentest) iop(1/8=18)

freq=noraman

SCRF=(PCM,SOLVENT=CH2Cl2) Temperature=298.15

geom=check guess=read

#N Geom=AllCheck Guess=TCheck SCRF=Check Test GenChk

RB3LYP/6-31G(d) Freq

Pointgroup= C1 Stoichiometry= C35H30BrF3N2O2S

C1[X(C35H30BrF3N2O2S)] #Atoms= 74

Charge = 0 Multiplicity = 1

SCF Energy= -4881.14688418 Predicted Change= -1.288239D-09

Optimization completed. {Found 3 times}

| Item | Max Val. | Criteria | Pass? | RMS Val. | Criteria |
|------|----------|----------|-------|----------|----------|
|------|----------|----------|-------|----------|----------|

Pass?

|       |         |         |         |         |         |   |
|-------|---------|---------|---------|---------|---------|---|
| Force | 0.00000 | 0.00045 | [ YES ] | 0.00000 | 0.00030 | [ |
|-------|---------|---------|---------|---------|---------|---|

YES ]

|       |         |         |         |         |         |   |
|-------|---------|---------|---------|---------|---------|---|
| Displ | 0.00111 | 0.00180 | [ YES ] | 0.00111 | 0.00180 | [ |
|-------|---------|---------|---------|---------|---------|---|

YES ]

Atomic Coordinates (Angstroms)

| Type | X | Y | Z |
|------|---|---|---|
|------|---|---|---|

|   |           |          |          |
|---|-----------|----------|----------|
| N | -2.382223 | 1.800085 | 0.086698 |
|---|-----------|----------|----------|

|   |           |          |          |
|---|-----------|----------|----------|
| C | -3.272352 | 1.447684 | 1.207431 |
|---|-----------|----------|----------|

|   |           |           |          |
|---|-----------|-----------|----------|
| C | -3.072553 | -0.006933 | 1.623726 |
|---|-----------|-----------|----------|

|   |           |           |          |
|---|-----------|-----------|----------|
| C | -4.148435 | -0.475991 | 2.635314 |
|---|-----------|-----------|----------|

|   |           |          |          |
|---|-----------|----------|----------|
| C | -4.311734 | 0.521482 | 3.796757 |
|---|-----------|----------|----------|

|   |           |           |          |
|---|-----------|-----------|----------|
| C | -3.814688 | -1.867749 | 3.200365 |
|---|-----------|-----------|----------|

|   |           |           |          |
|---|-----------|-----------|----------|
| C | -2.961488 | -0.904477 | 0.363386 |
|---|-----------|-----------|----------|

|   |           |           |           |
|---|-----------|-----------|-----------|
| C | -4.214469 | -1.074943 | -0.488966 |
|---|-----------|-----------|-----------|

|   |           |           |           |
|---|-----------|-----------|-----------|
| N | -1.784362 | -0.422794 | -0.430620 |
|---|-----------|-----------|-----------|

|   |           |           |           |
|---|-----------|-----------|-----------|
| C | -0.808134 | -1.453851 | -0.773004 |
|---|-----------|-----------|-----------|

|   |          |           |           |
|---|----------|-----------|-----------|
| C | 0.613262 | -1.069617 | -0.824029 |
|---|----------|-----------|-----------|

|   |          |           |           |
|---|----------|-----------|-----------|
| H | 0.761418 | -0.067059 | -1.205811 |
|---|----------|-----------|-----------|

|   |          |           |           |
|---|----------|-----------|-----------|
| C | 1.529038 | -2.002741 | -1.558755 |
|---|----------|-----------|-----------|

|   |           |           |           |
|---|-----------|-----------|-----------|
| O | -1.247782 | -2.591616 | -0.859813 |
|---|-----------|-----------|-----------|

|   |           |          |           |
|---|-----------|----------|-----------|
| C | -1.632513 | 0.906060 | -0.582943 |
|---|-----------|----------|-----------|

|   |           |          |           |
|---|-----------|----------|-----------|
| S | -0.725354 | 1.674597 | -1.883573 |
|---|-----------|----------|-----------|

|   |           |          |           |
|---|-----------|----------|-----------|
| C | -1.357066 | 3.251633 | -1.421661 |
|---|-----------|----------|-----------|

|   |           |          |           |
|---|-----------|----------|-----------|
| C | -2.246520 | 3.129383 | -0.348043 |
|---|-----------|----------|-----------|

|   |           |          |           |
|---|-----------|----------|-----------|
| C | -1.065672 | 4.491835 | -1.984807 |
|---|-----------|----------|-----------|

|   |           |          |           |
|---|-----------|----------|-----------|
| C | -1.703728 | 5.614428 | -1.456690 |
|---|-----------|----------|-----------|

|   |           |          |           |
|---|-----------|----------|-----------|
| C | -2.602250 | 5.493051 | -0.388260 |
|---|-----------|----------|-----------|

|   |           |          |          |
|---|-----------|----------|----------|
| C | -2.885238 | 4.252058 | 0.181529 |
|---|-----------|----------|----------|

|   |           |           |           |
|---|-----------|-----------|-----------|
| C | -4.716271 | -0.084910 | -1.348299 |
|---|-----------|-----------|-----------|

|   |           |           |           |
|---|-----------|-----------|-----------|
| C | -5.881440 | -0.301235 | -2.086514 |
|---|-----------|-----------|-----------|

|   |           |           |           |
|---|-----------|-----------|-----------|
| C | -6.570490 | -1.510421 | -1.980101 |
|---|-----------|-----------|-----------|

|   |           |           |           |
|---|-----------|-----------|-----------|
| C | -6.077392 | -2.508008 | -1.137894 |
|---|-----------|-----------|-----------|

|   |           |           |           |
|---|-----------|-----------|-----------|
| C | -4.908012 | -2.291919 | -0.407828 |
|---|-----------|-----------|-----------|

|   |          |           |           |
|---|----------|-----------|-----------|
| C | 2.503145 | -1.438946 | -2.403962 |
|---|----------|-----------|-----------|

|   |          |           |           |
|---|----------|-----------|-----------|
| C | 3.397339 | -2.233539 | -3.120803 |
|---|----------|-----------|-----------|

|   |          |           |           |
|---|----------|-----------|-----------|
| C | 3.340917 | -3.624072 | -3.009813 |
|---|----------|-----------|-----------|

|   |          |           |           |
|---|----------|-----------|-----------|
| C | 2.381937 | -4.201355 | -2.173930 |
|---|----------|-----------|-----------|

|   |          |           |           |
|---|----------|-----------|-----------|
| C | 1.487874 | -3.405954 | -1.456187 |
|---|----------|-----------|-----------|

|   |           |          |          |
|---|-----------|----------|----------|
| H | -4.302628 | 1.647198 | 0.889905 |
|---|-----------|----------|----------|

|   |           |          |          |
|---|-----------|----------|----------|
| H | -3.027789 | 2.121460 | 2.030423 |
|---|-----------|----------|----------|

|   |           |           |          |
|---|-----------|-----------|----------|
| H | -5.109922 | -0.538978 | 2.107002 |
|---|-----------|-----------|----------|

|   |           |          |          |
|---|-----------|----------|----------|
| H | -3.359825 | 0.679362 | 4.319452 |
|---|-----------|----------|----------|

|   |           |          |          |
|---|-----------|----------|----------|
| H | -5.030281 | 0.131640 | 4.525791 |
|---|-----------|----------|----------|

|   |           |          |          |
|---|-----------|----------|----------|
| H | -4.684496 | 1.496857 | 3.466423 |
|---|-----------|----------|----------|

|   |           |           |          |
|---|-----------|-----------|----------|
| H | -3.815801 | -2.647688 | 2.433142 |
|---|-----------|-----------|----------|

|   |           |           |          |
|---|-----------|-----------|----------|
| H | -4.553938 | -2.155300 | 3.955839 |
|---|-----------|-----------|----------|

|   |           |           |          |
|---|-----------|-----------|----------|
| H | -2.826544 | -1.869756 | 3.675934 |
|---|-----------|-----------|----------|

|   |           |           |          |
|---|-----------|-----------|----------|
| H | -2.088696 | -0.071704 | 2.100914 |
|---|-----------|-----------|----------|

|   |           |           |          |
|---|-----------|-----------|----------|
| H | -2.659727 | -1.895148 | 0.689435 |
|---|-----------|-----------|----------|

|   |           |          |           |
|---|-----------|----------|-----------|
| H | -0.369015 | 4.580612 | -2.811608 |
|---|-----------|----------|-----------|

|   |           |          |           |
|---|-----------|----------|-----------|
| H | -1.499469 | 6.591930 | -1.881676 |
|---|-----------|----------|-----------|

|   |           |          |          |
|---|-----------|----------|----------|
| H | -3.087642 | 6.378655 | 0.009108 |
|---|-----------|----------|----------|

|    |           |           |           |
|----|-----------|-----------|-----------|
| H  | -3.579906 | 4.169639  | 1.009374  |
| H  | -4.197816 | 0.860121  | -1.470892 |
| H  | -6.246893 | 0.479023  | -2.748387 |
| H  | -7.476870 | -1.676500 | -2.555461 |
| H  | -6.593844 | -3.460314 | -1.055787 |
| H  | -4.521858 | -3.087022 | 0.224130  |
| H  | 2.559912  | -0.357040 | -2.499283 |
| H  | 4.135276  | -1.764615 | -3.766796 |
| H  | 4.033637  | -4.249519 | -3.566746 |
| H  | 2.326578  | -5.283017 | -2.077696 |
| H  | 0.750713  | -3.872523 | -0.817755 |
| C  | 1.046594  | -0.485152 | 0.922570  |
| C  | 0.828700  | -1.706150 | 1.860371  |
| F  | 1.331575  | -1.442836 | 3.090549  |
| F  | 1.393728  | -2.873167 | 1.455253  |
| F  | -0.489975 | -1.971547 | 2.033482  |
| C  | 2.538283  | -0.116157 | 0.799365  |
| O  | 0.255318  | 0.487881  | 1.224625  |
| C  | 3.603737  | -1.027846 | 0.775320  |
| C  | 4.925441  | -0.586791 | 0.682934  |
| C  | 5.181372  | 0.778959  | 0.600388  |
| Br | 6.997156  | 1.391496  | 0.467987  |
| C  | 4.145132  | 1.709766  | 0.617013  |

|   |          |           |          |
|---|----------|-----------|----------|
| C | 2.832961 | 1.250969  | 0.723378 |
| H | 3.420685 | -2.093207 | 0.833080 |
| H | 5.741841 | -1.301124 | 0.671728 |
| H | 4.358019 | 2.772244  | 0.559847 |
| H | 2.006190 | 1.951371  | 0.765281 |

-----  
 Statistical Thermodynamic Analysis

Temperature= 298.150 Kelvin Pressure= 1.00000 Atm

=====  
 SCF Energy= -4881.14688418 Predicted Change= -  
 1.288239D-09  
 Zero-point correction (ZPE)= -4880.5699 0.57696  
 Internal Energy (U)= -4880.5316 0.61522  
 Enthalpy (H)= -4880.5307  
 0.61617  
 Gibbs Free Energy (G)= -4880.6433  
 0.50358

-----  
 Frequencies -- -144.7230 12.7018 18.7286

183.15K thermal correction = 0.541593  
 Single point SCF = -4884.231724

# NMR Spectra

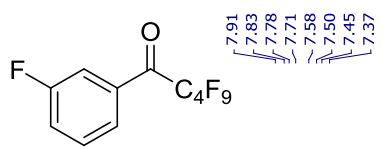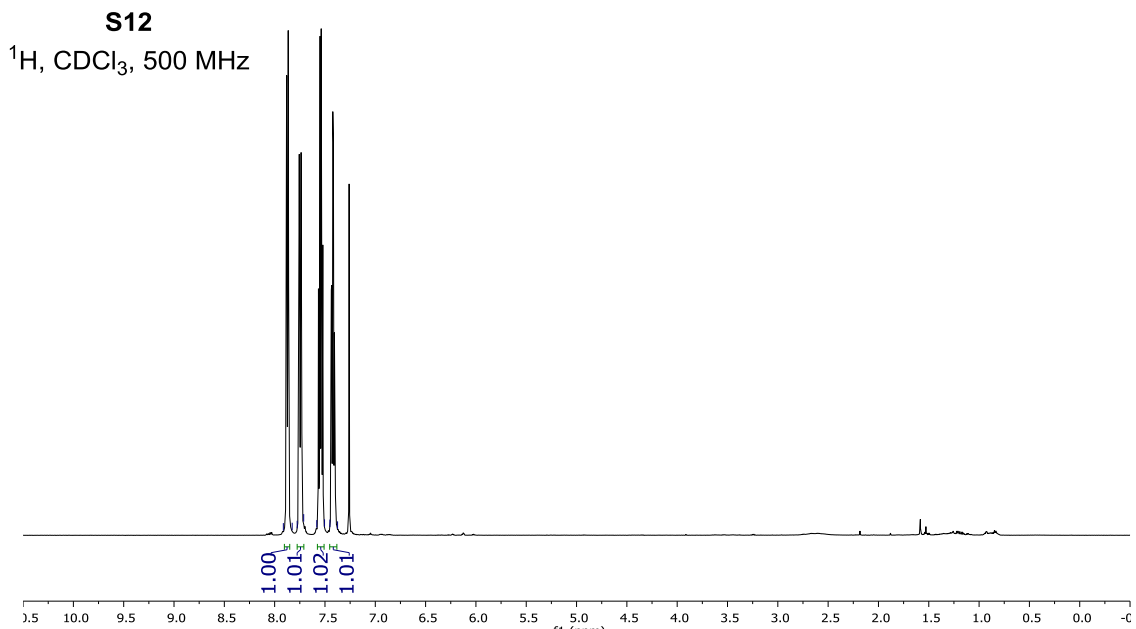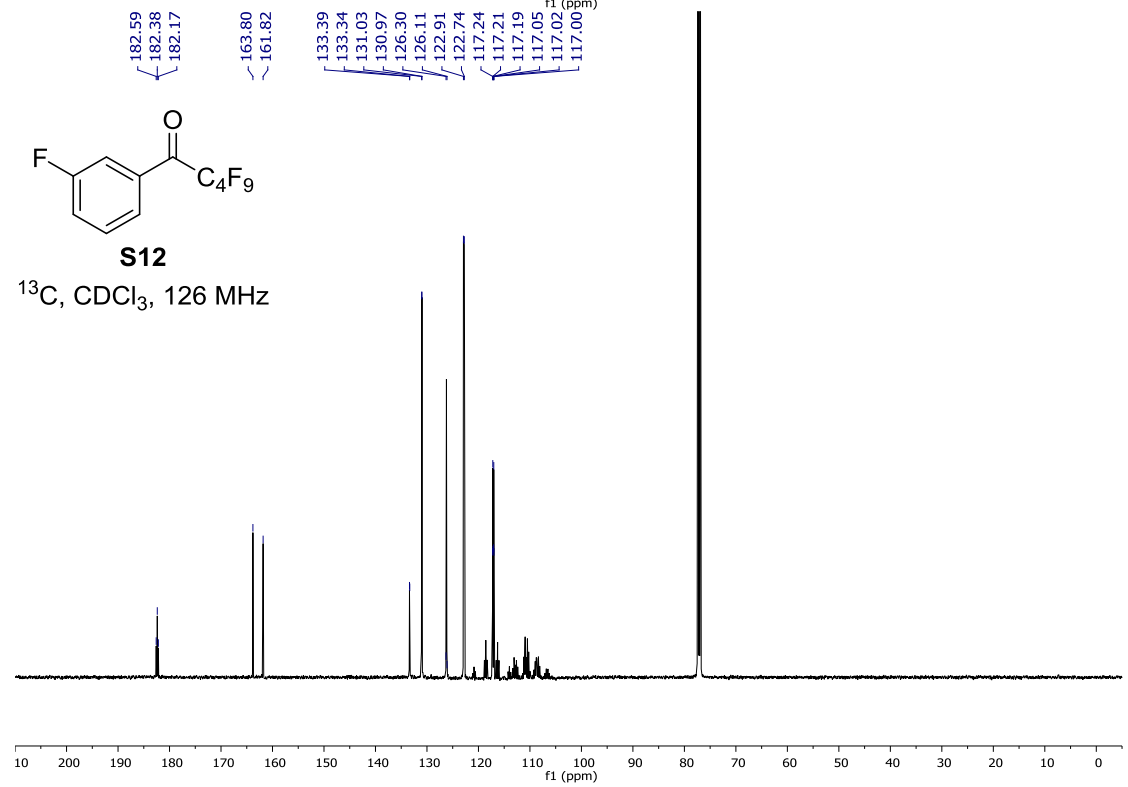

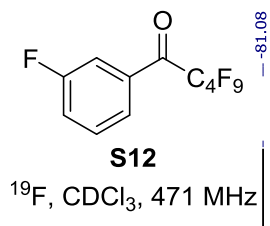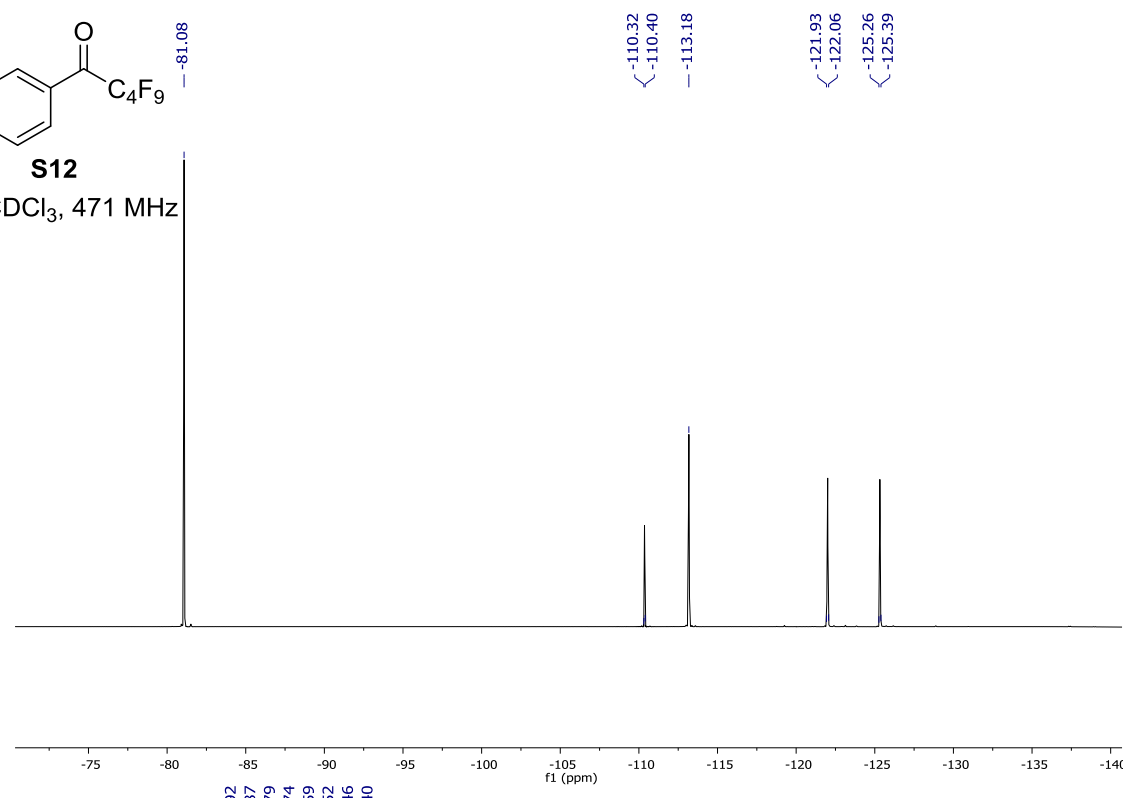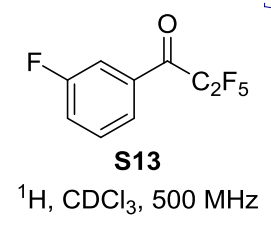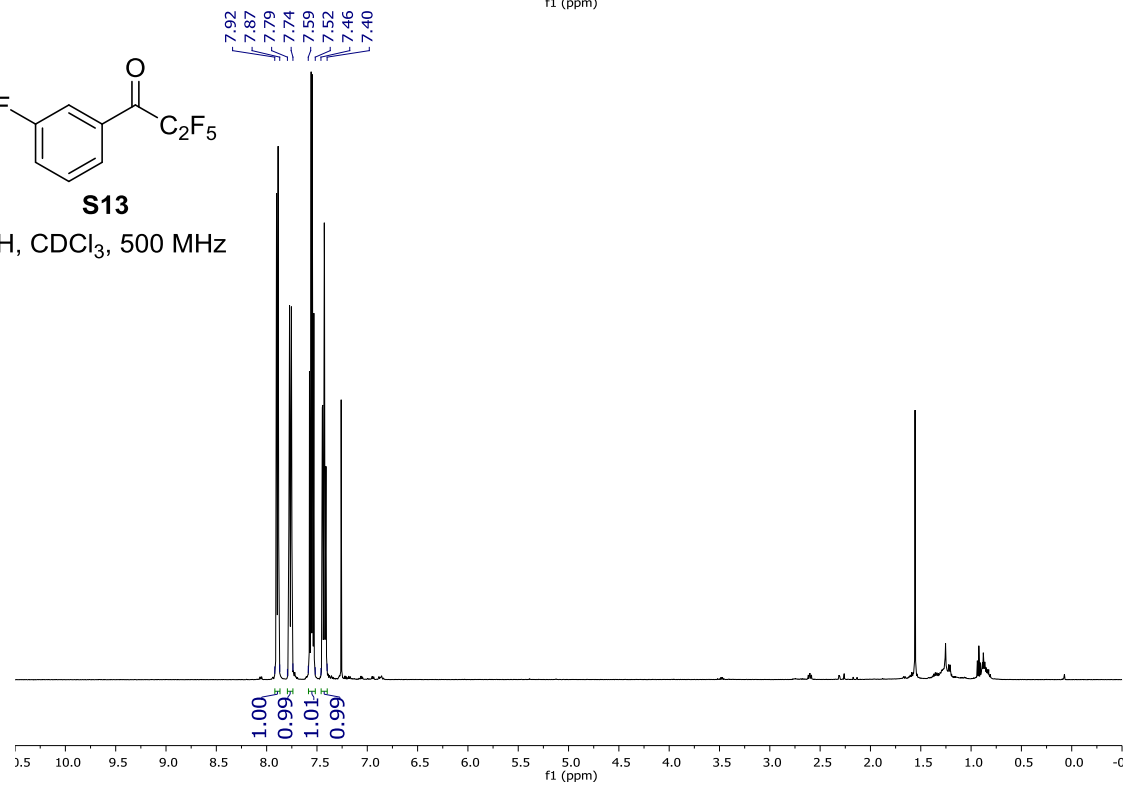

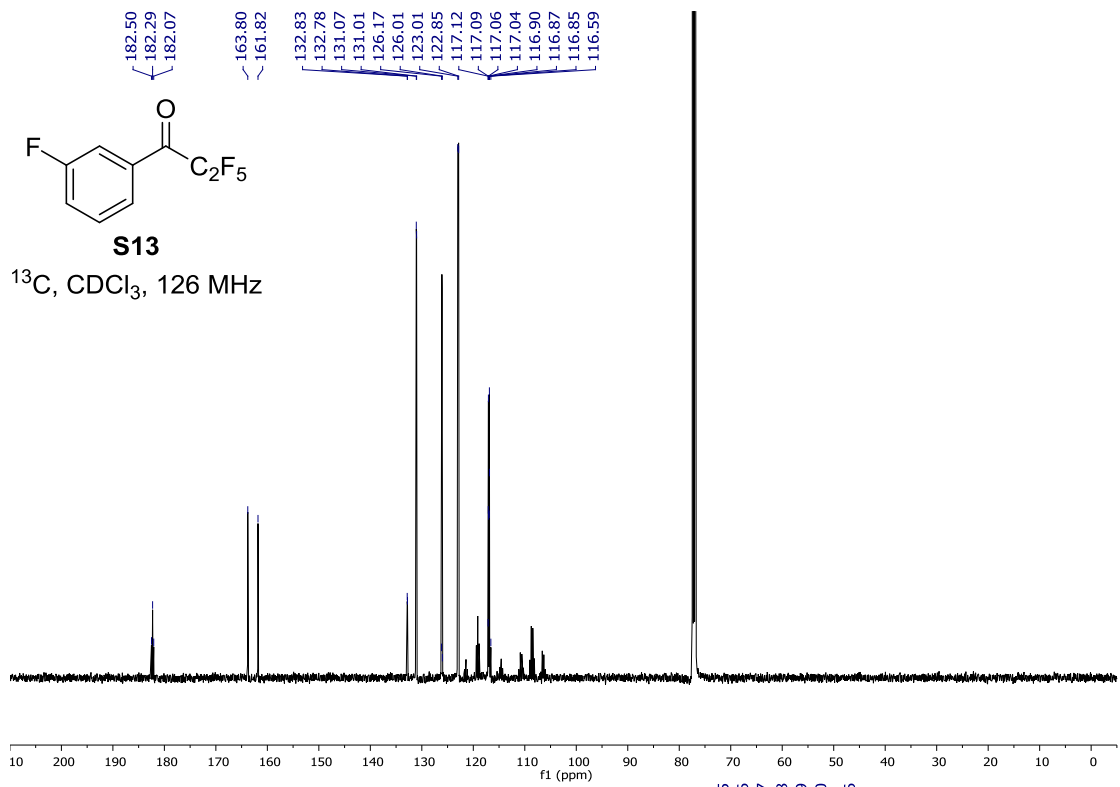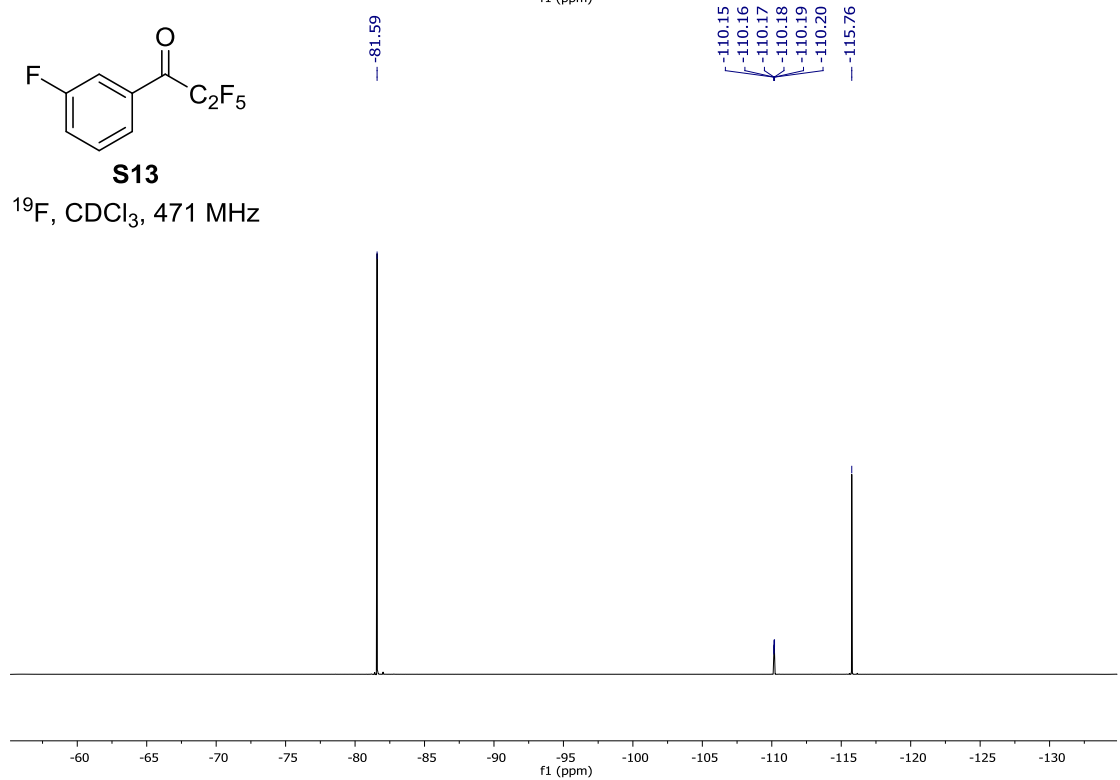

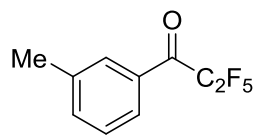

**S17**

$^1\text{H}$ ,  $\text{CDCl}_3$ , 500 MHz

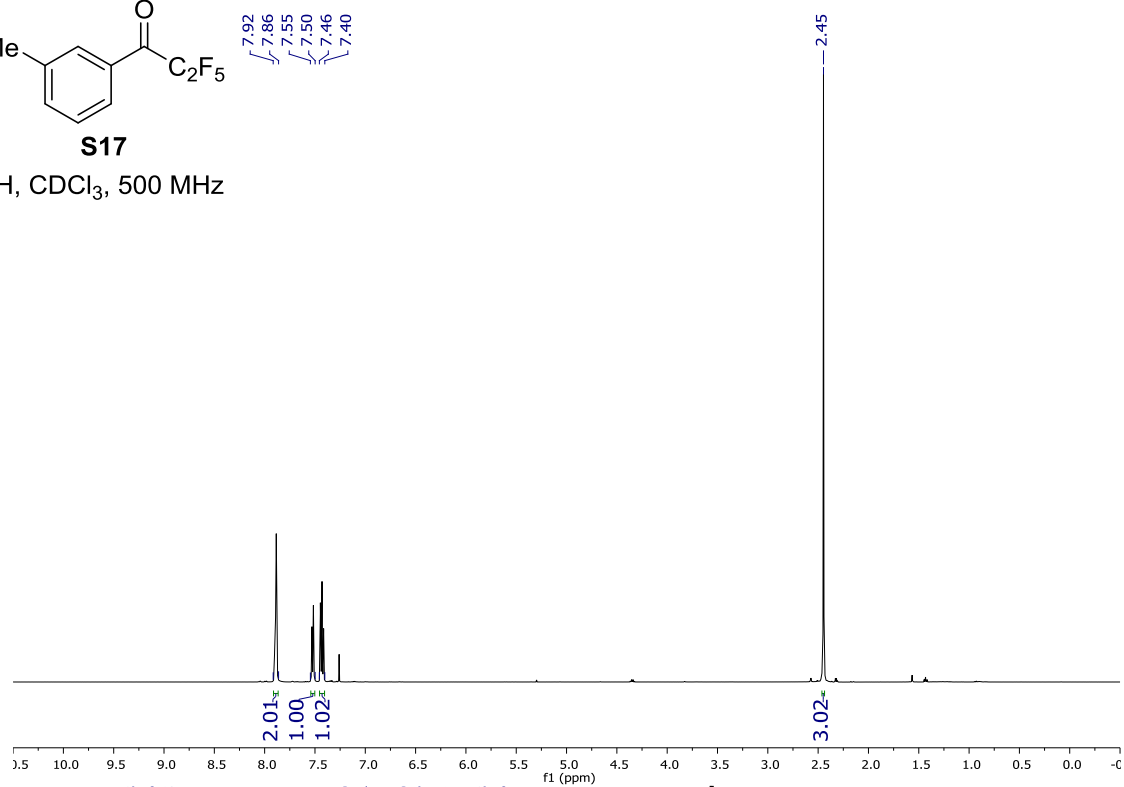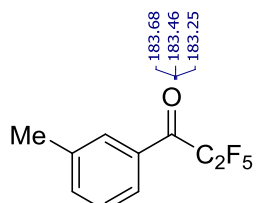

**S17**

$^{13}\text{C}$ ,  $\text{CDCl}_3$ , 126 MHz

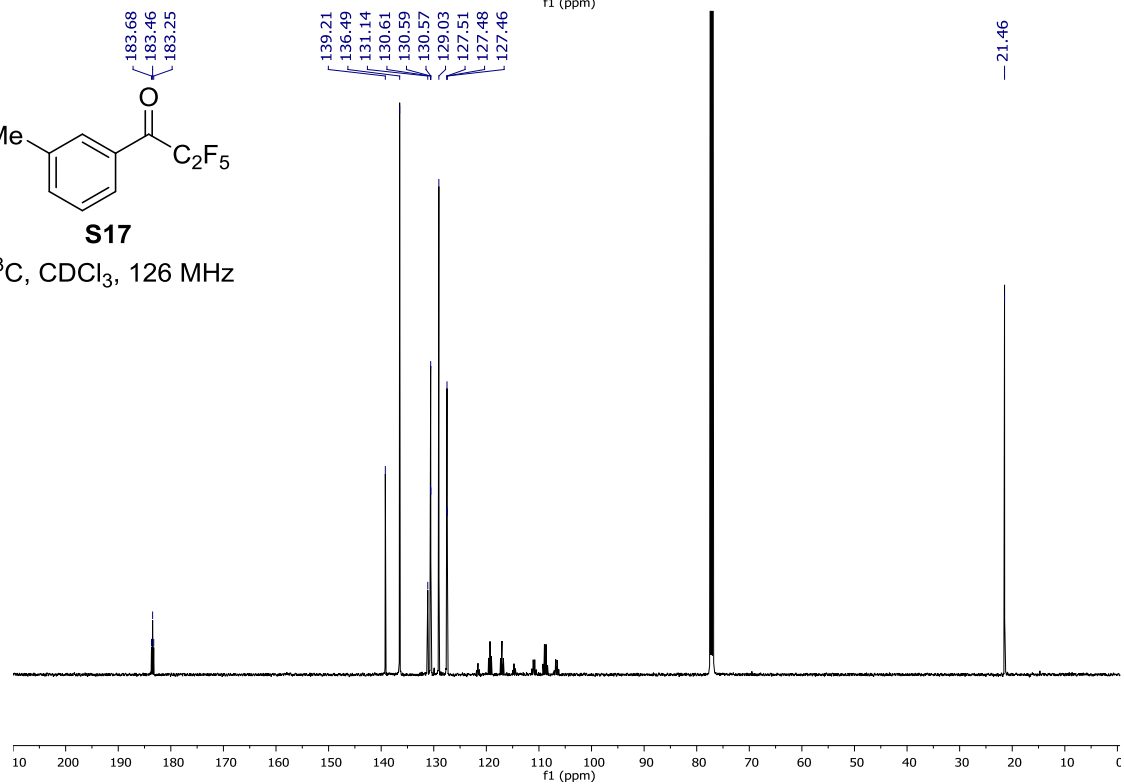

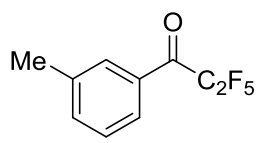

**S17**

$^{19}\text{F}$ ,  $\text{CDCl}_3$ , 471 MHz

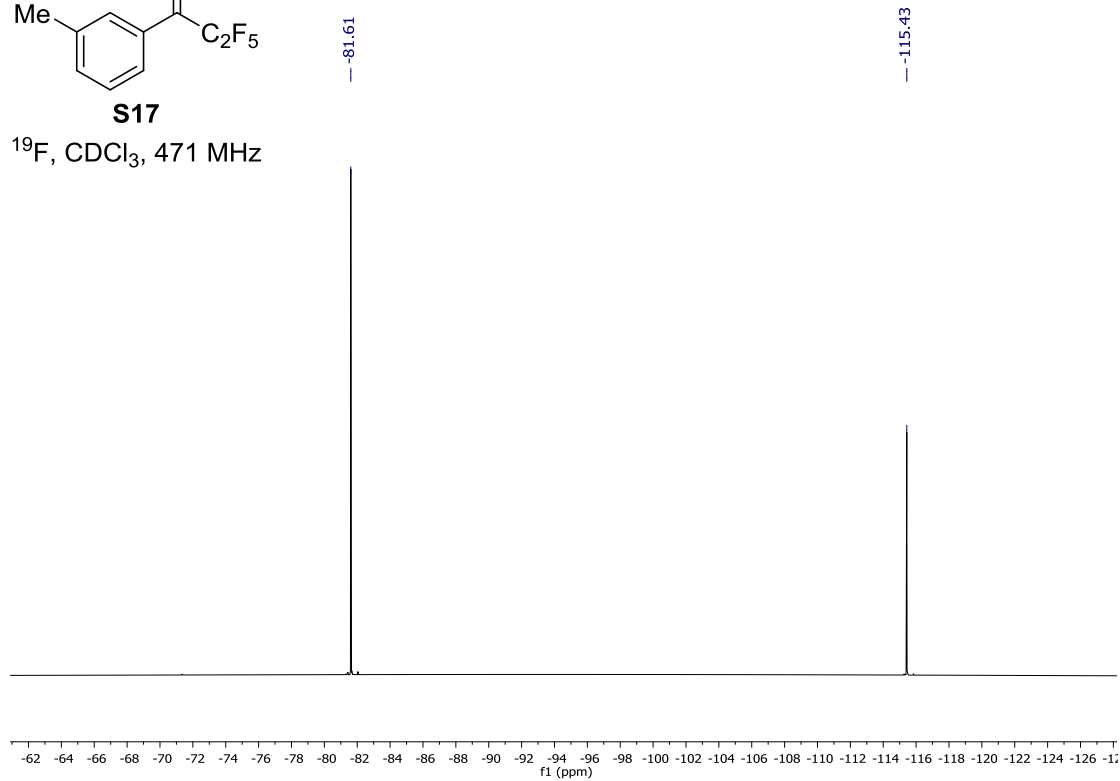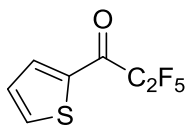

**S18**

$^1\text{H}$ ,  $\text{CDCl}_3$ , 400 MHz

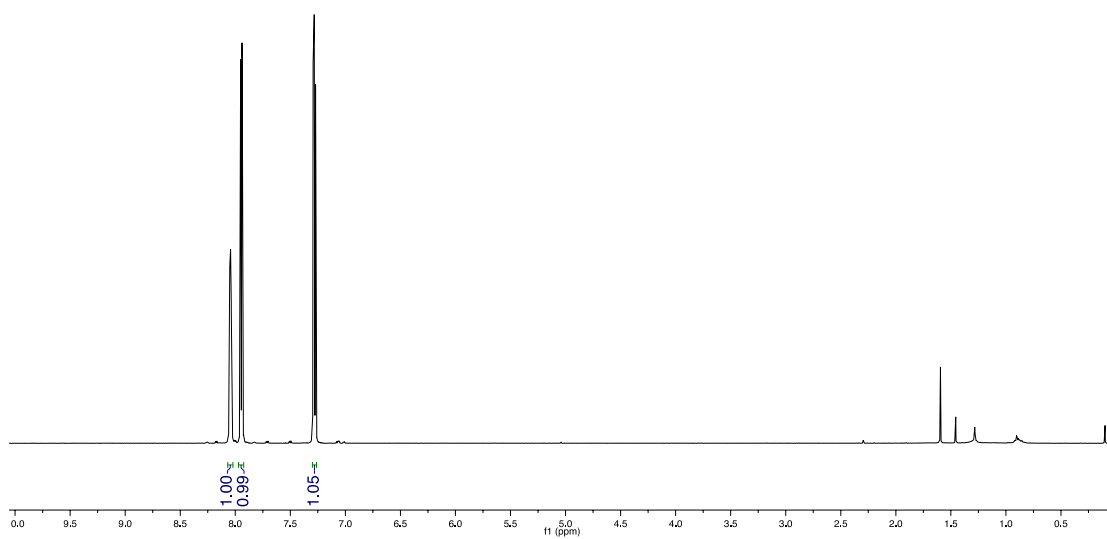

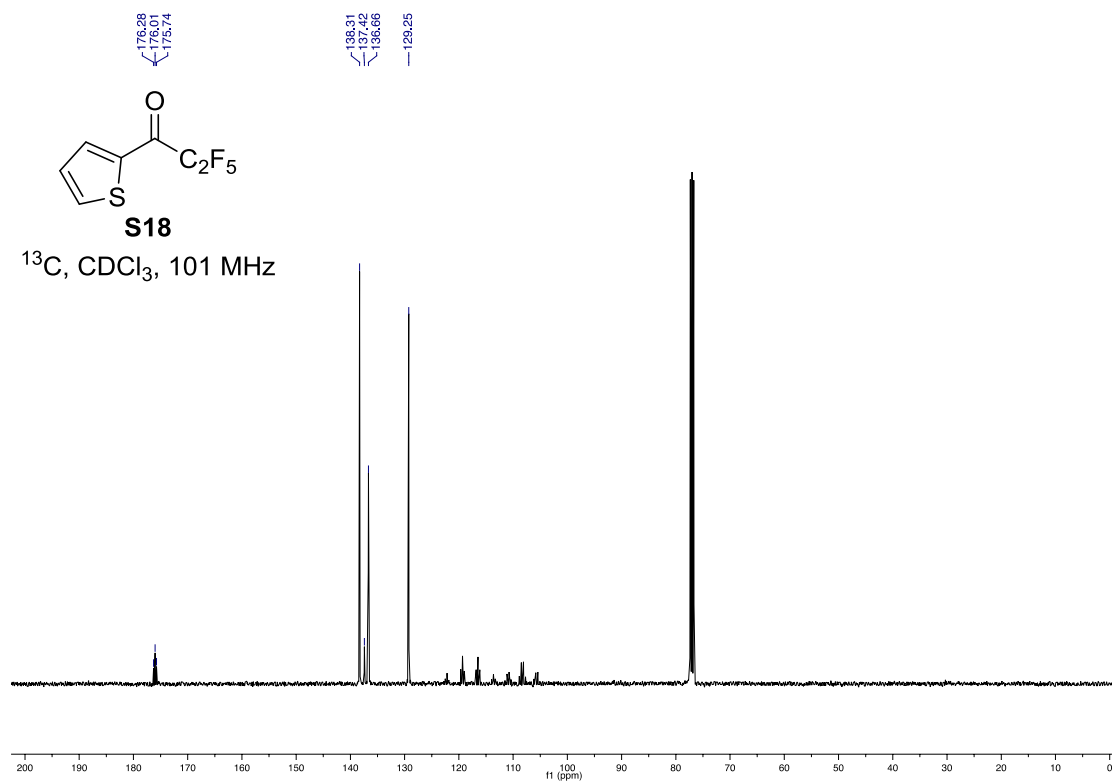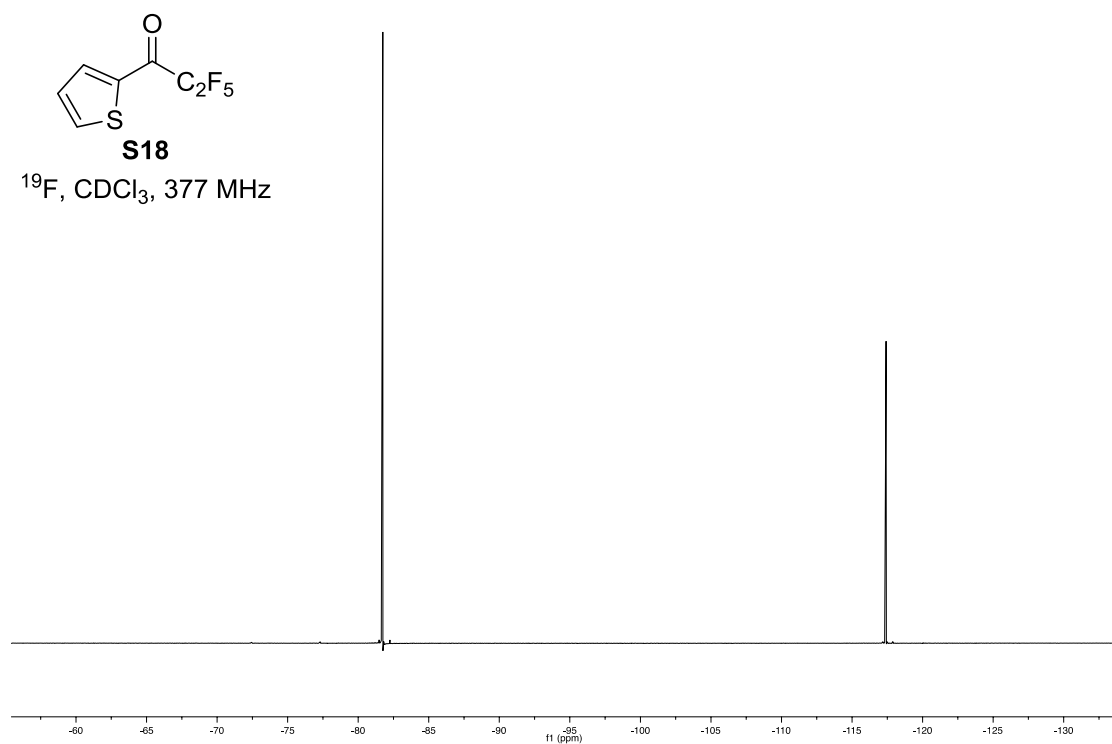



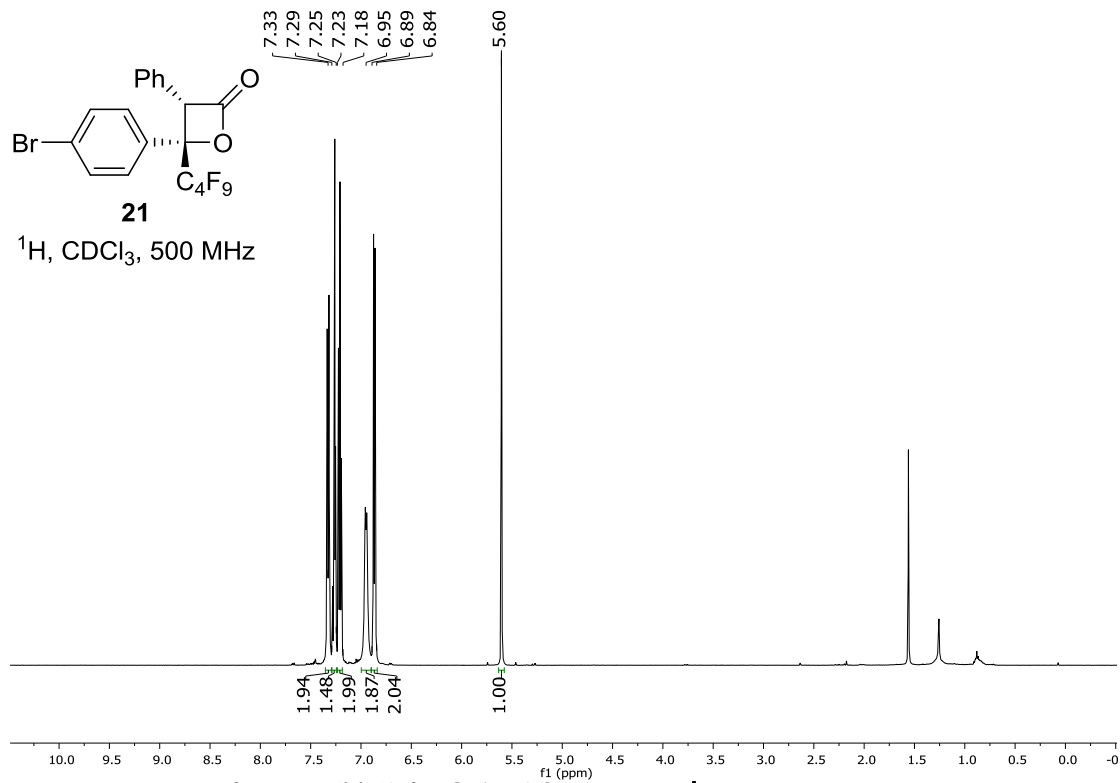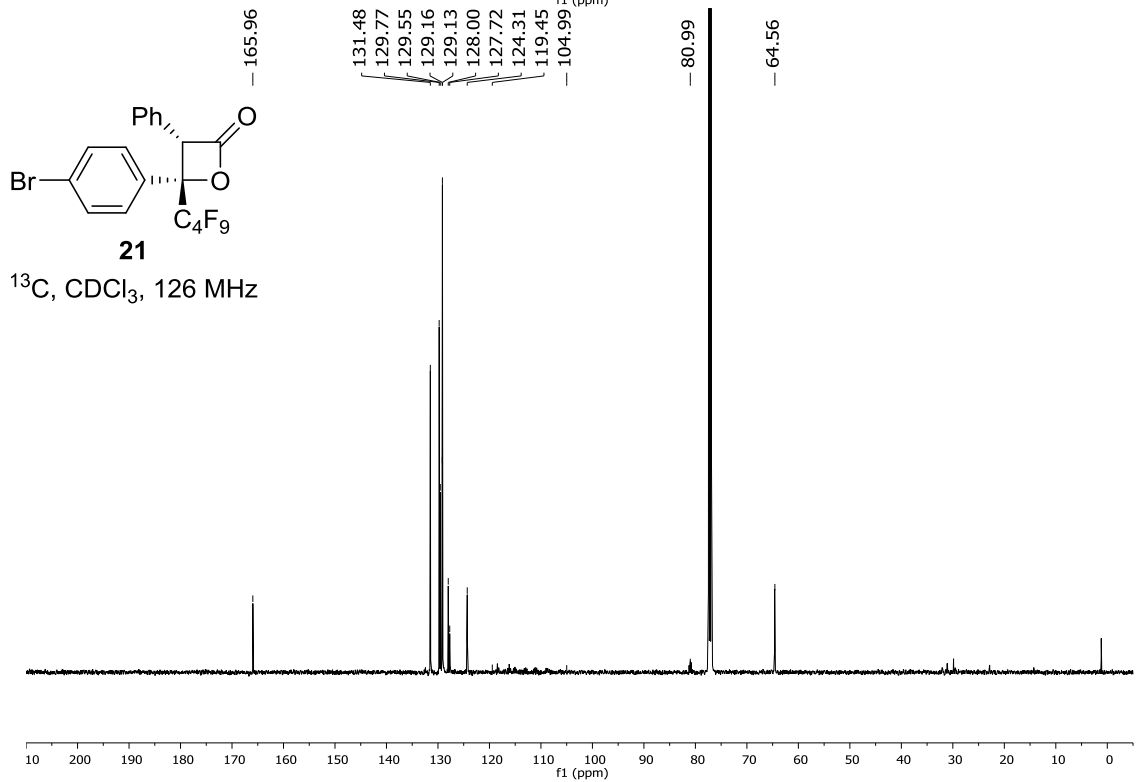

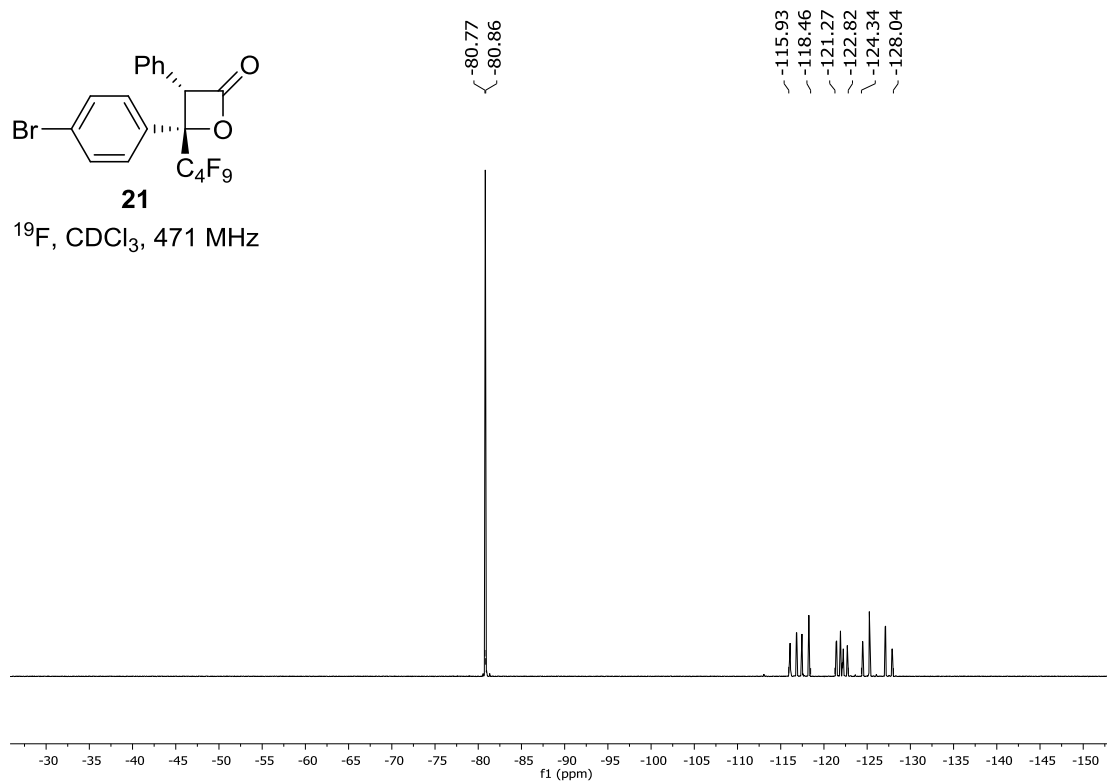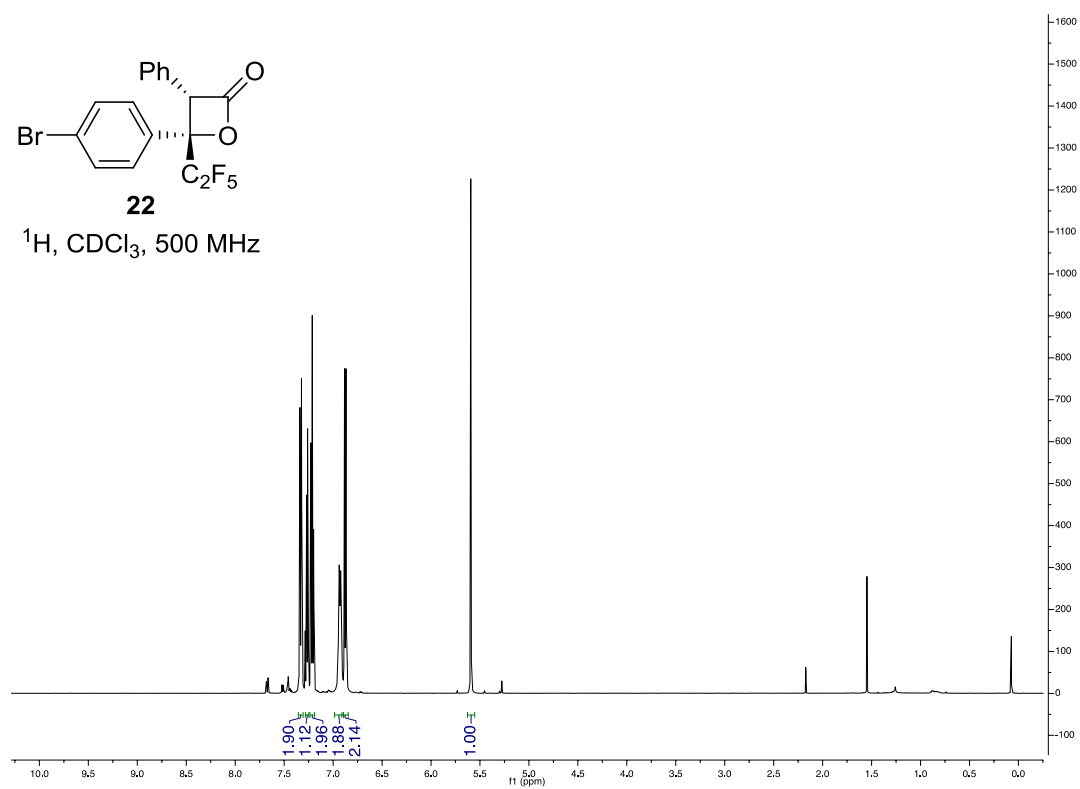

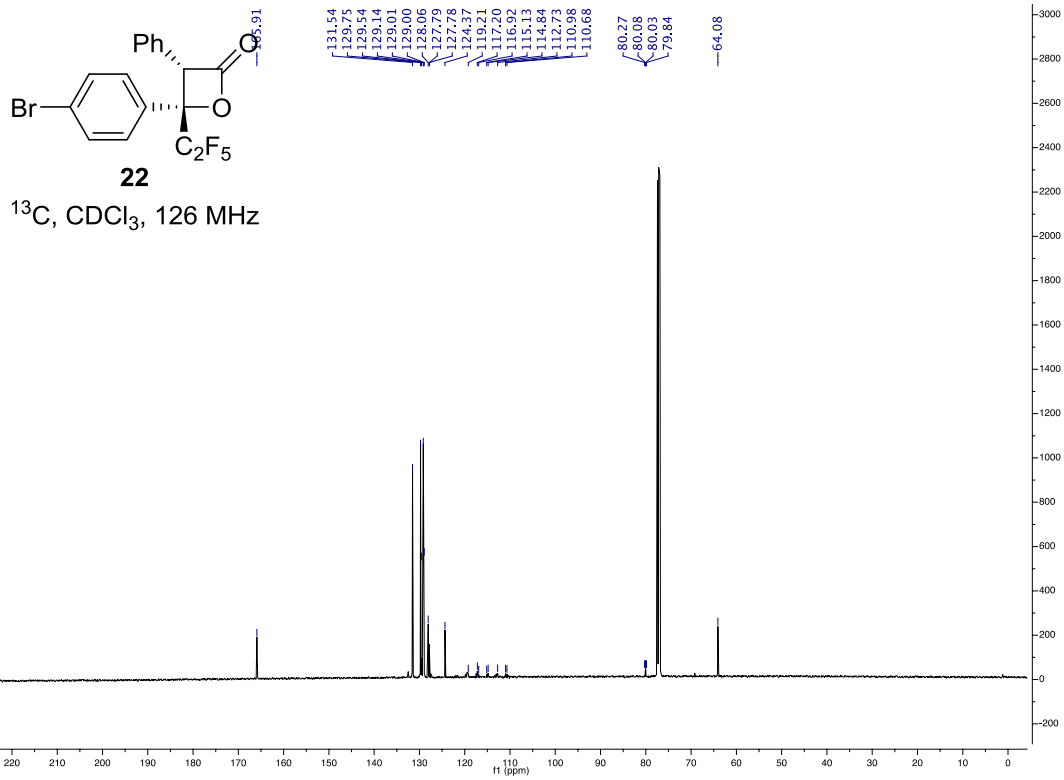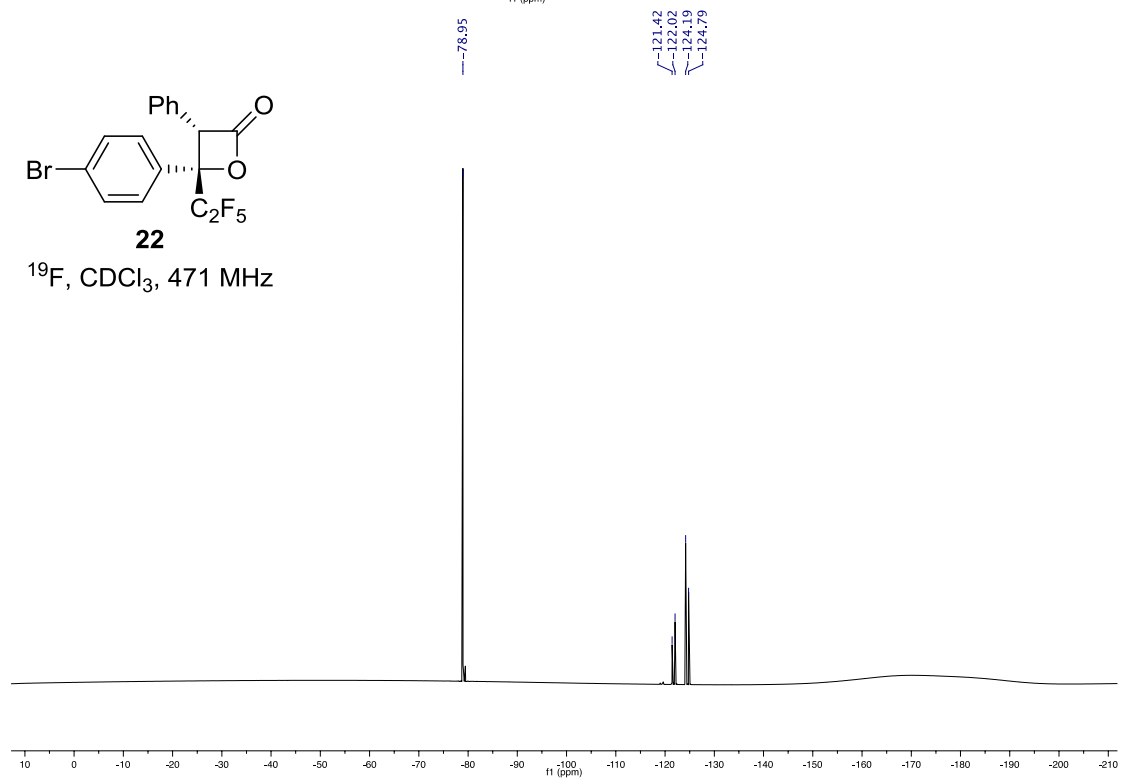

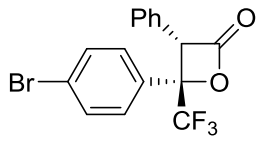

$^1\text{H}$ ,  $\text{CDCl}_3$ , 500 MHz

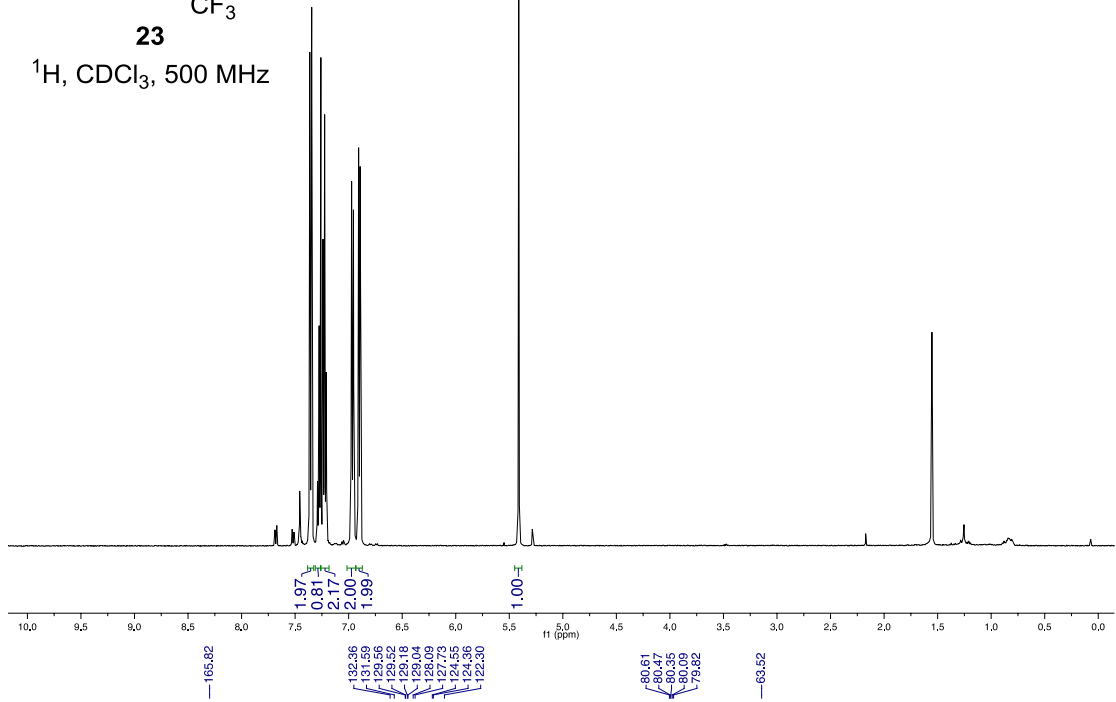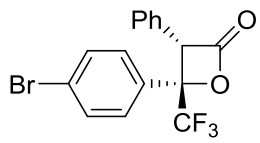

$^{13}\text{C}$ ,  $\text{CDCl}_3$ , 126 MHz

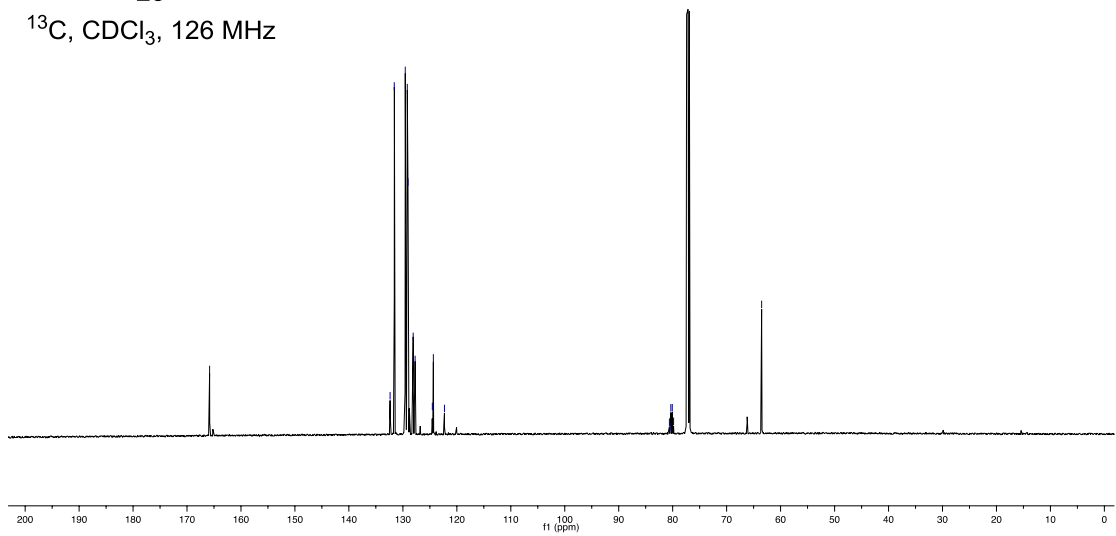

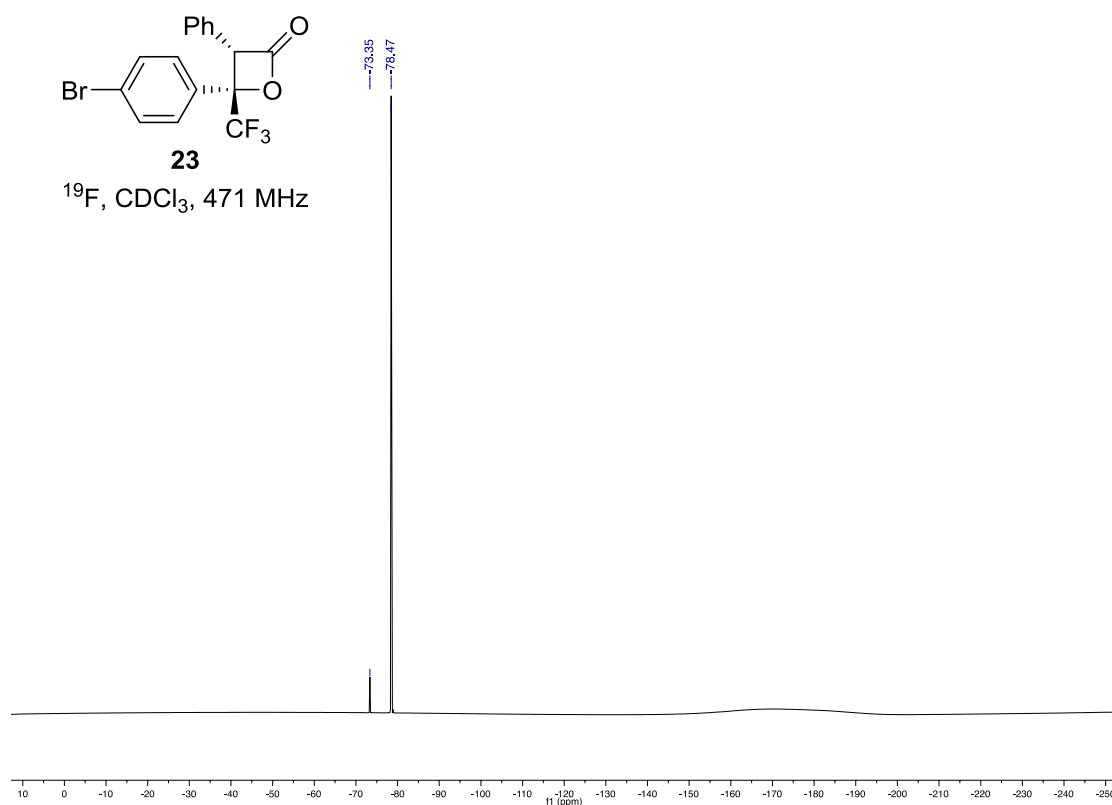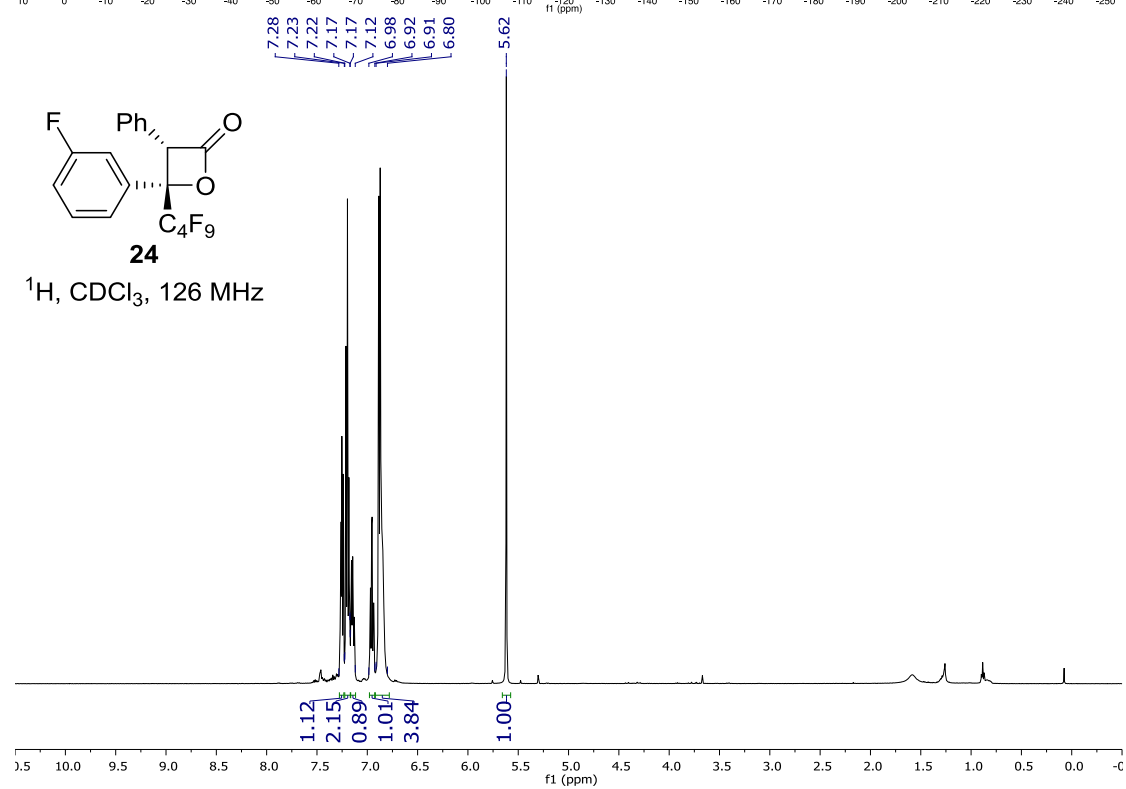

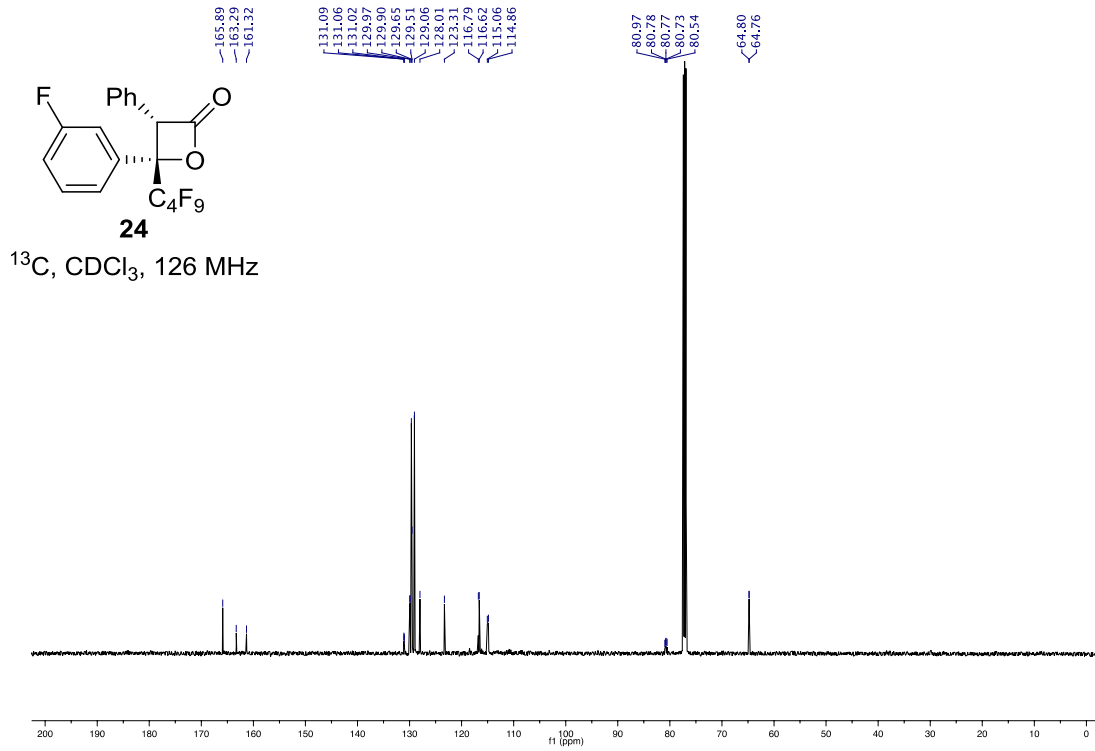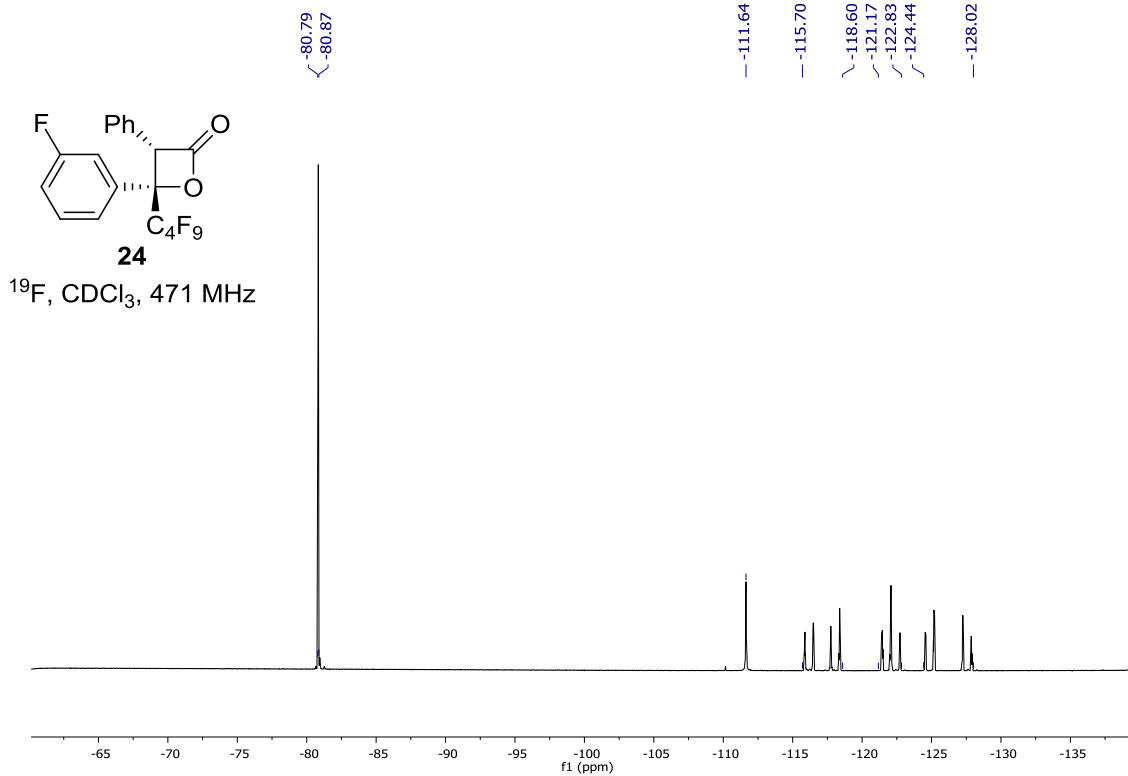

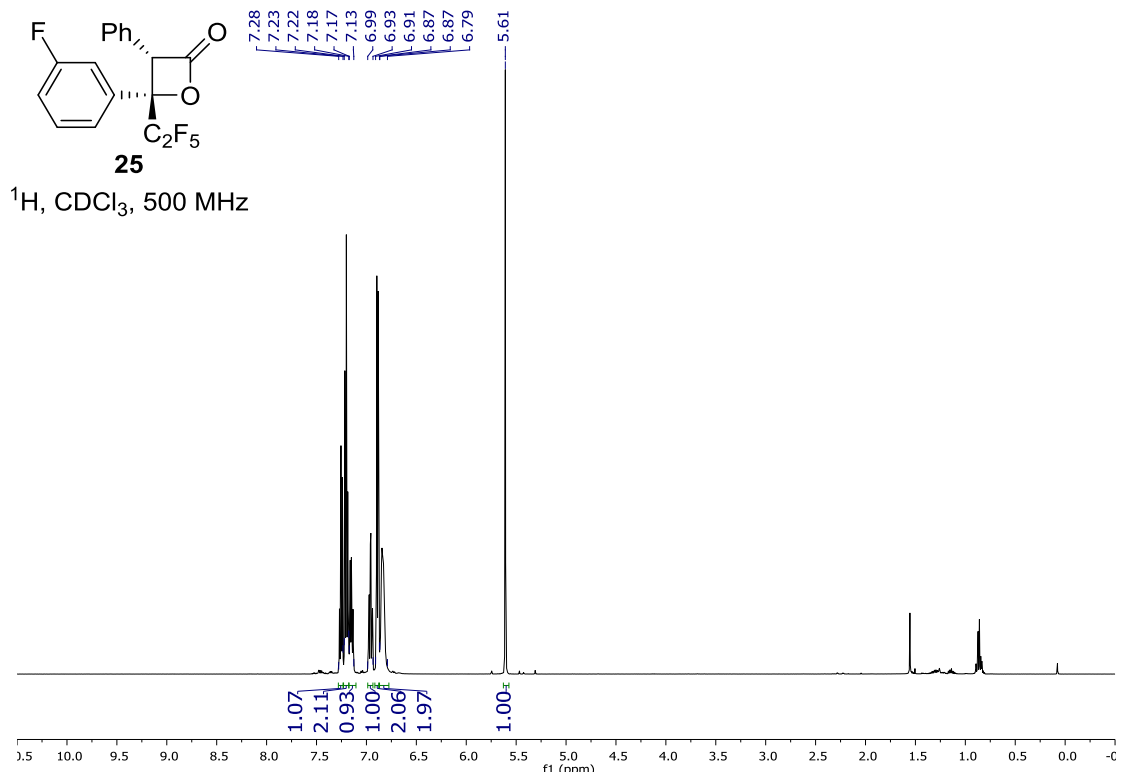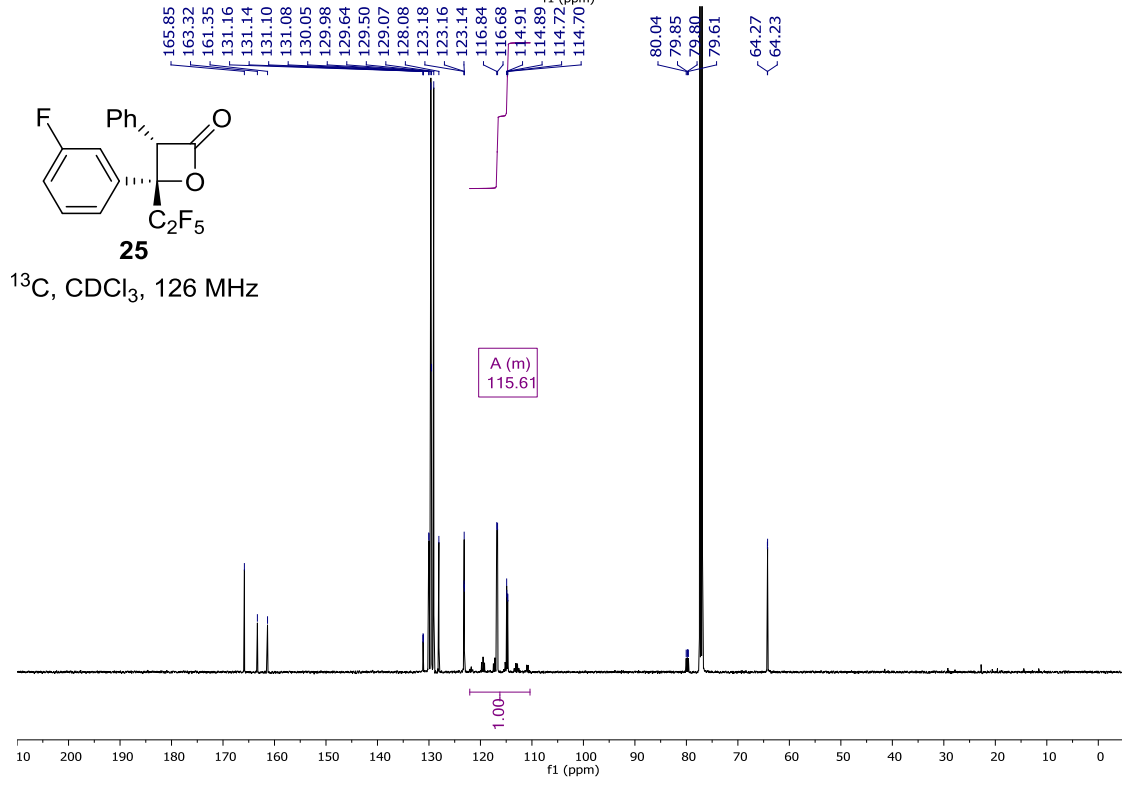

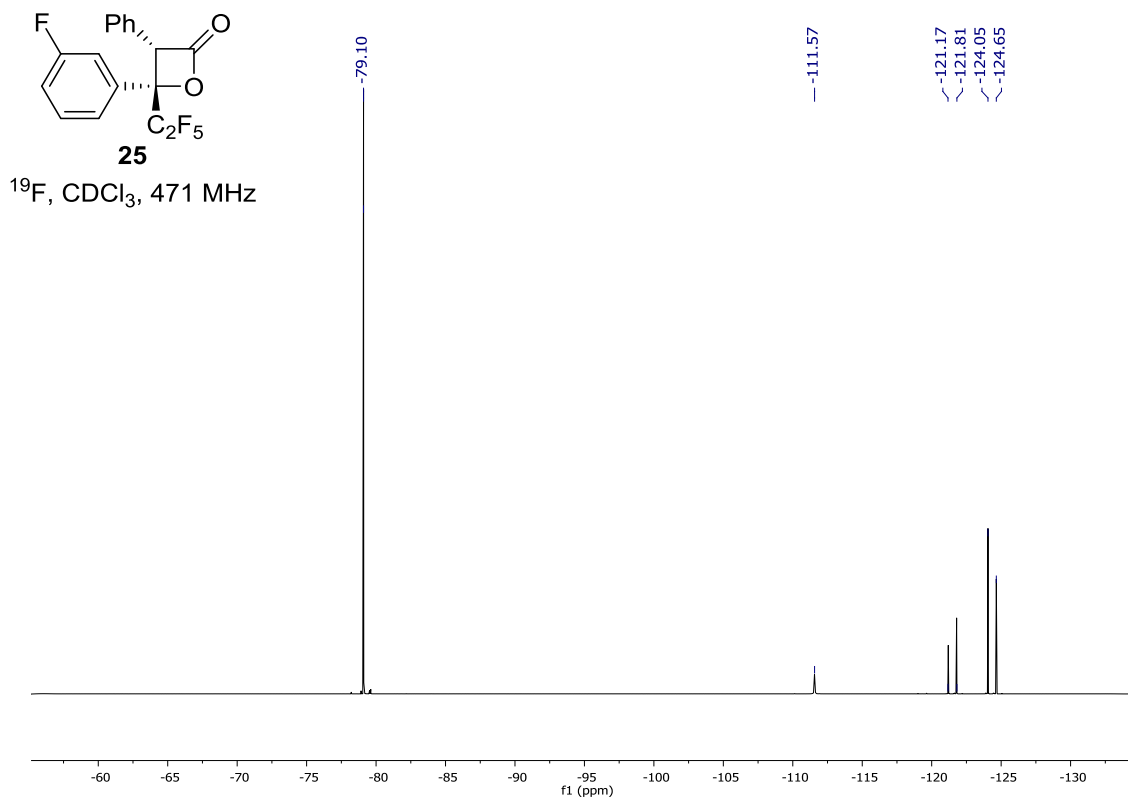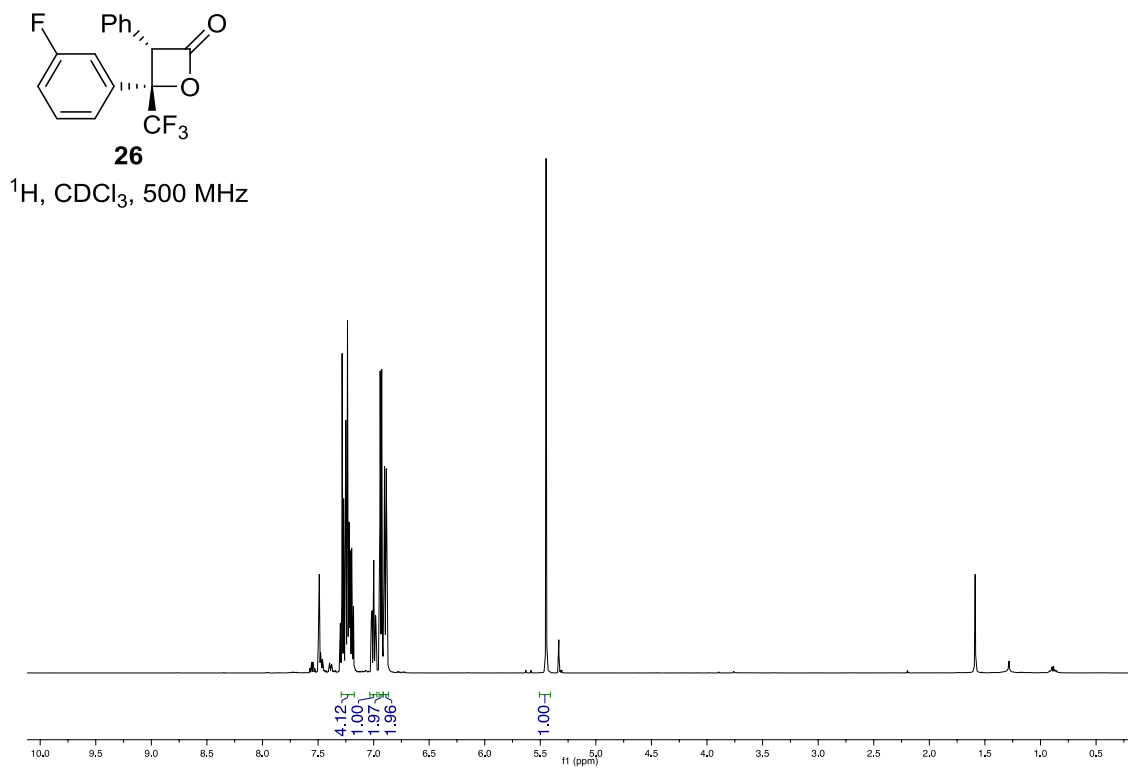



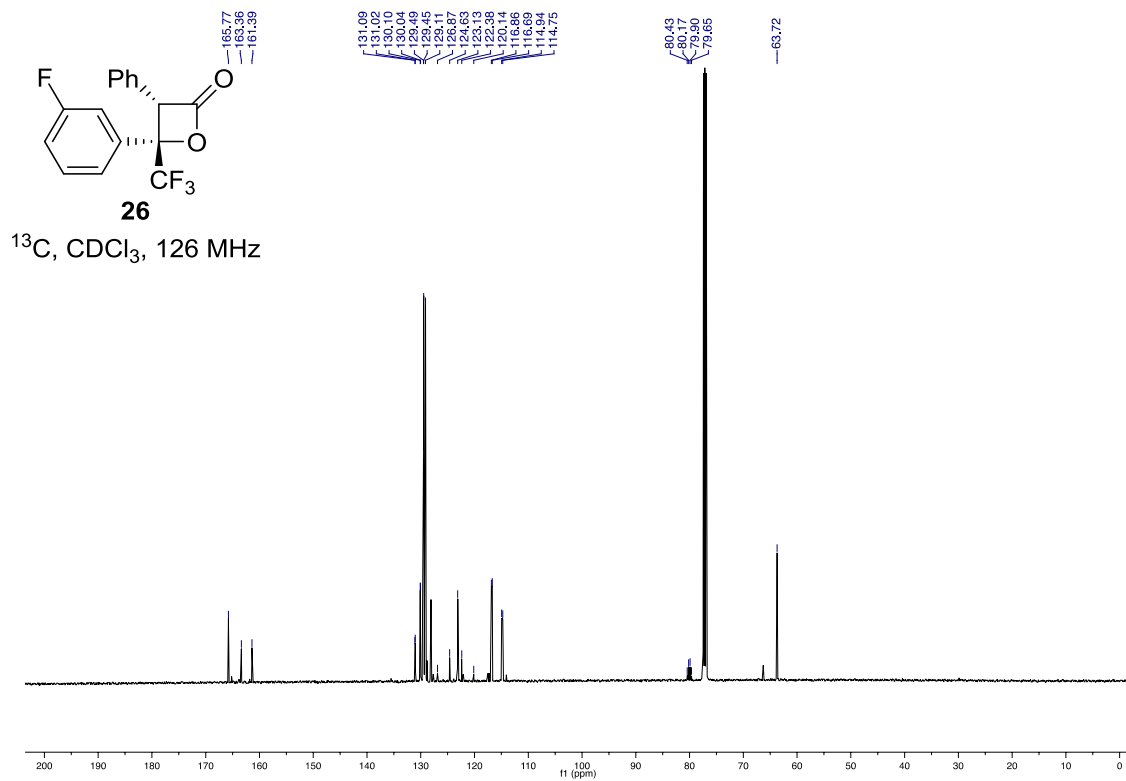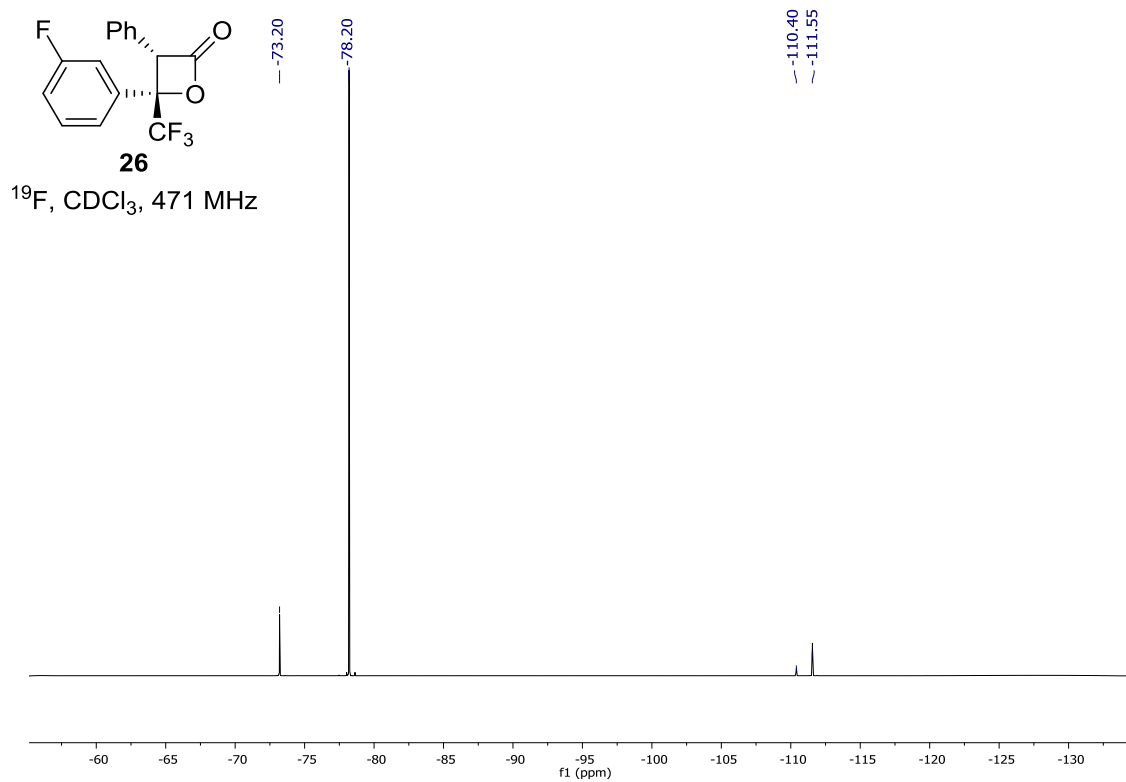

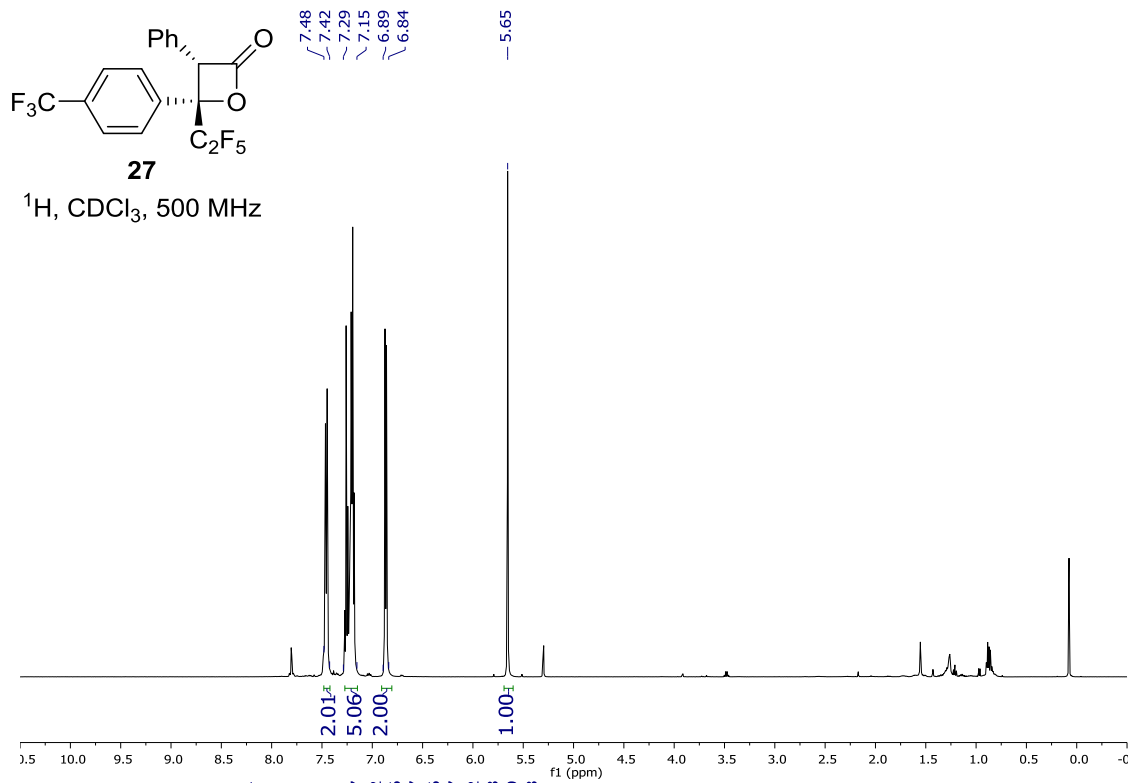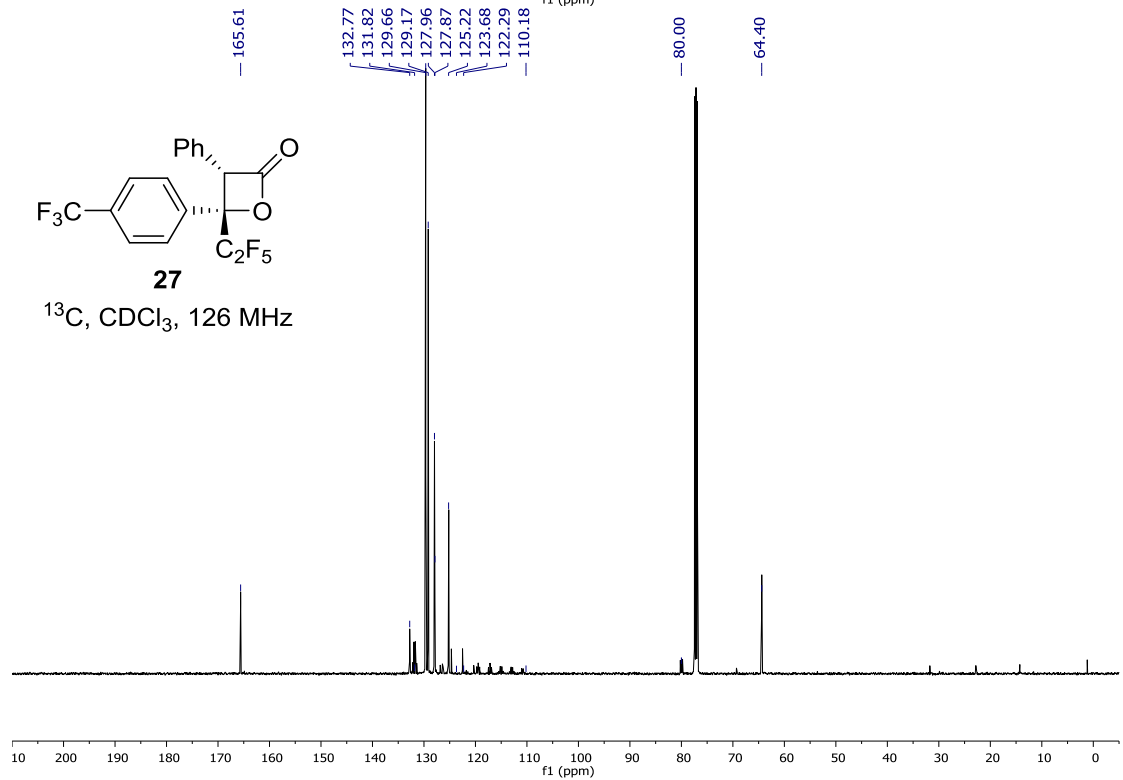

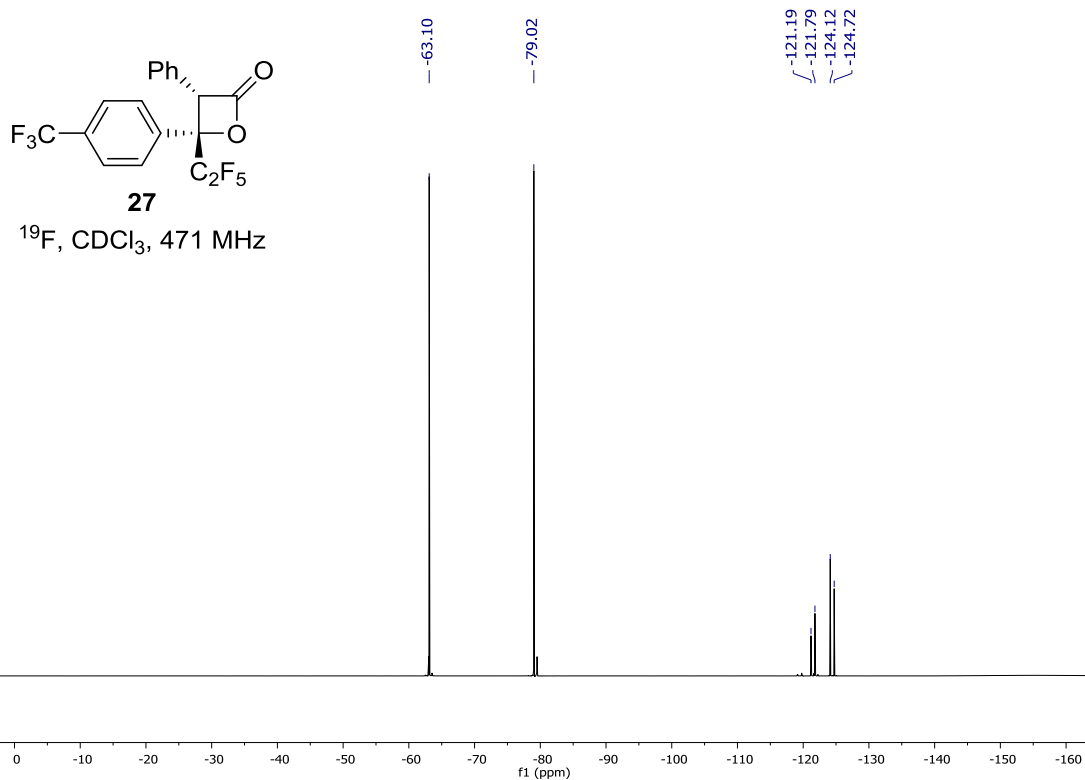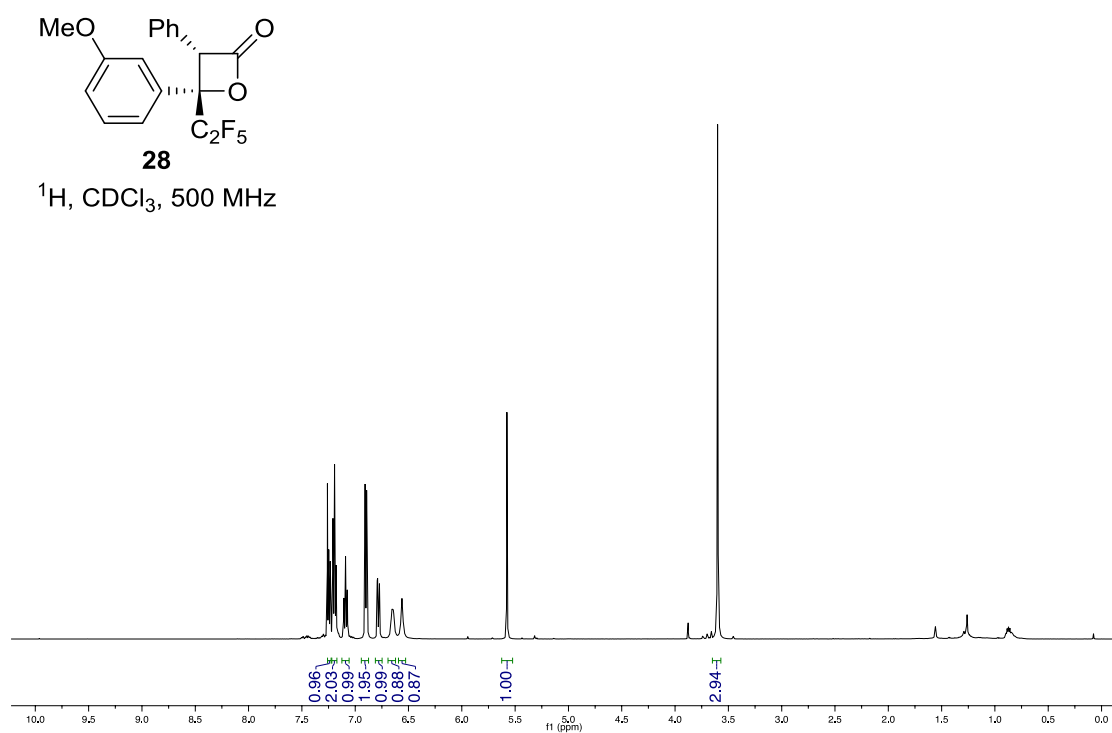

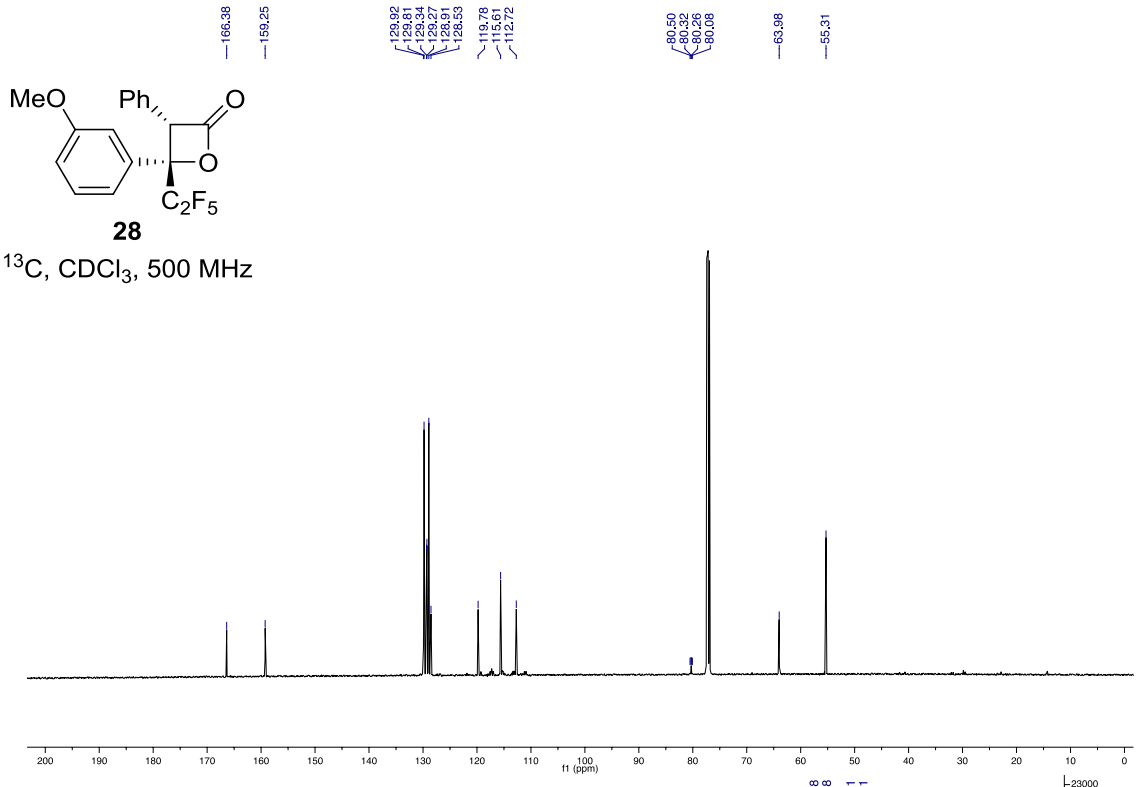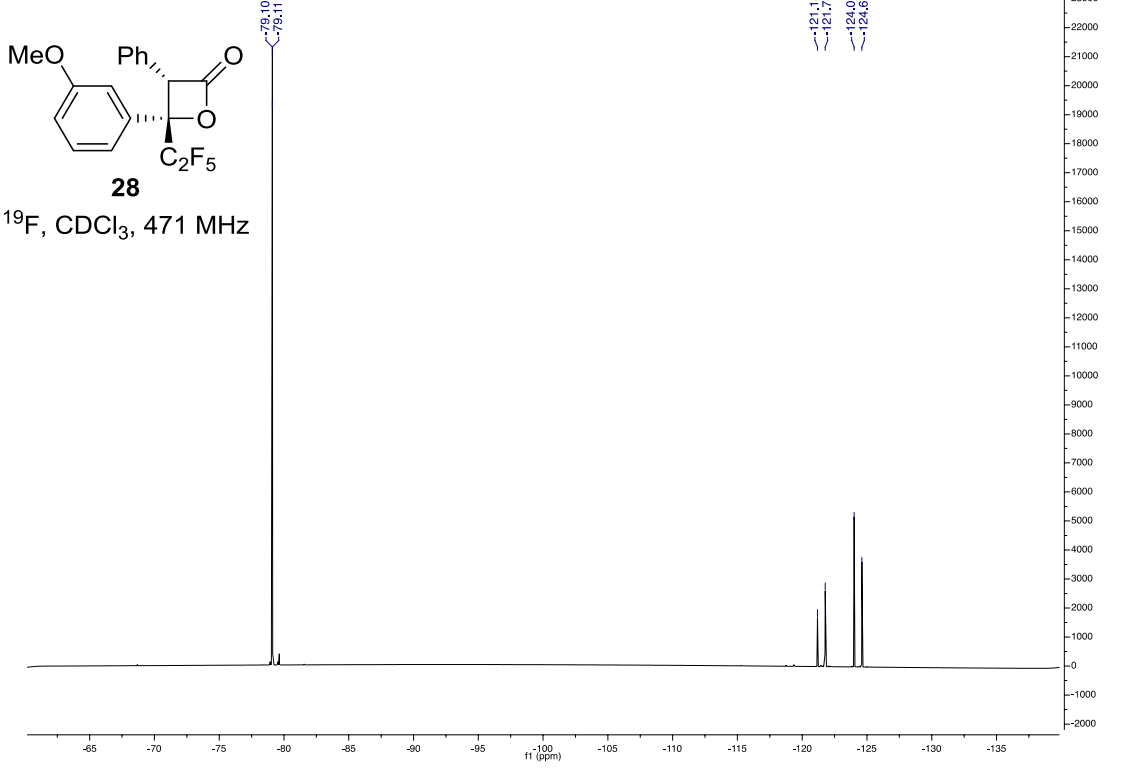

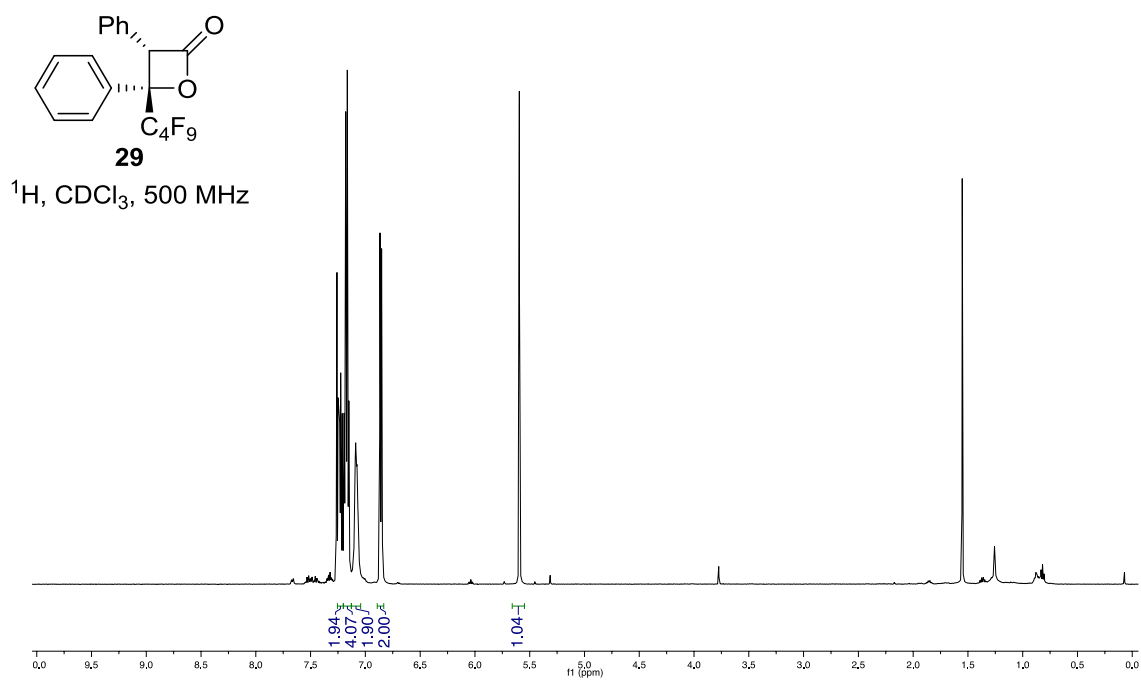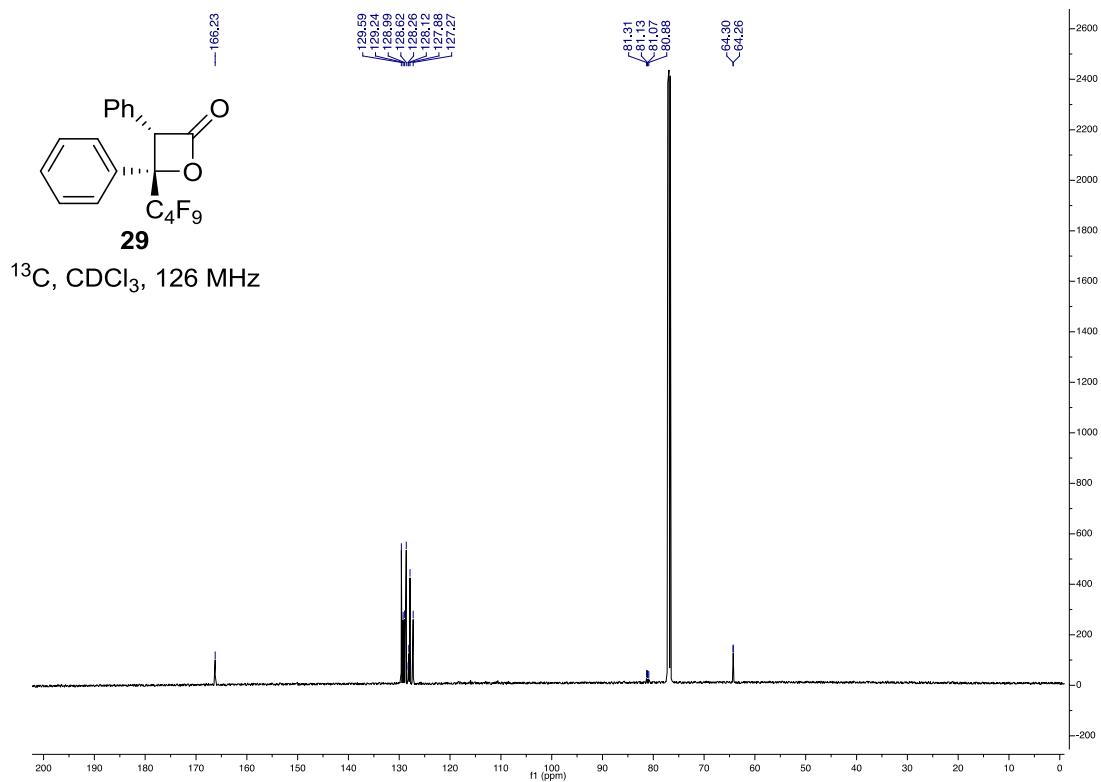

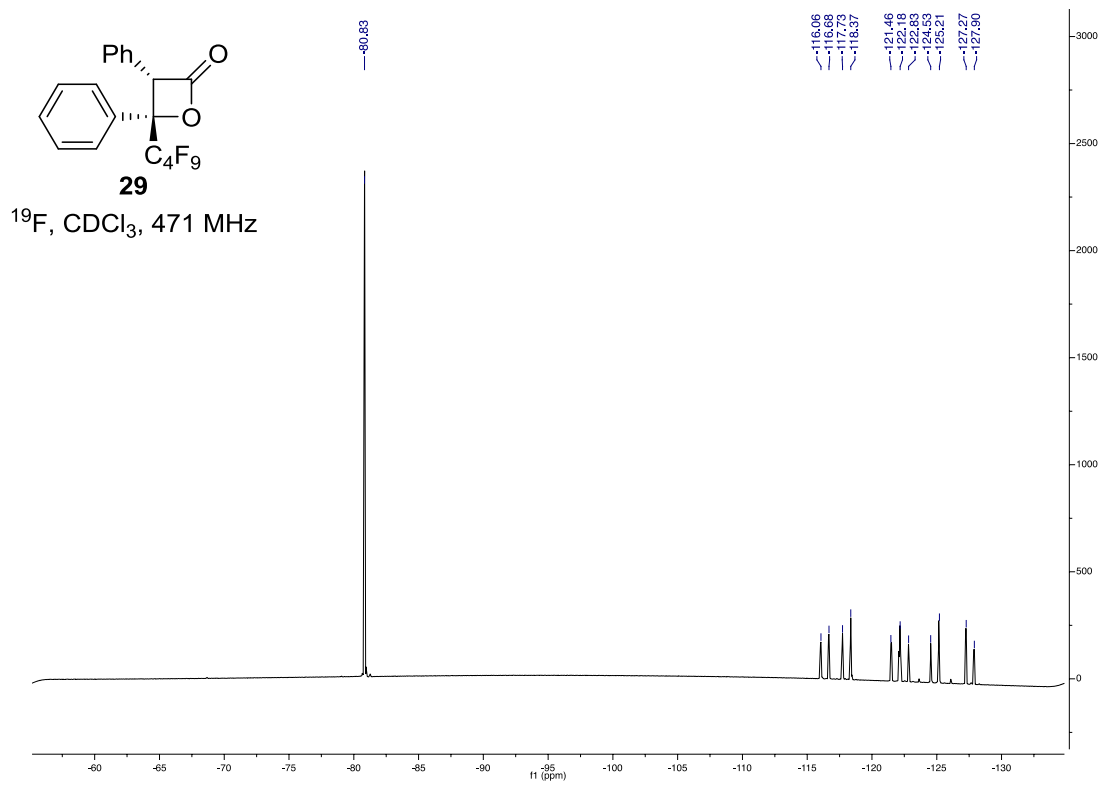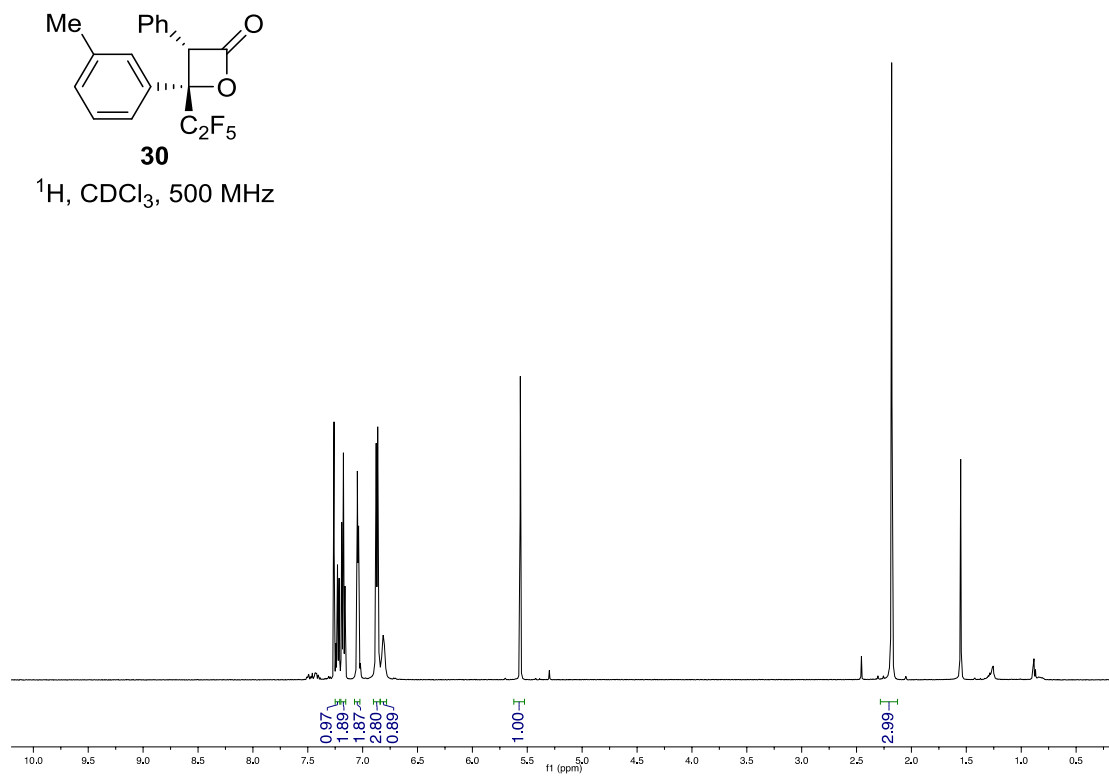

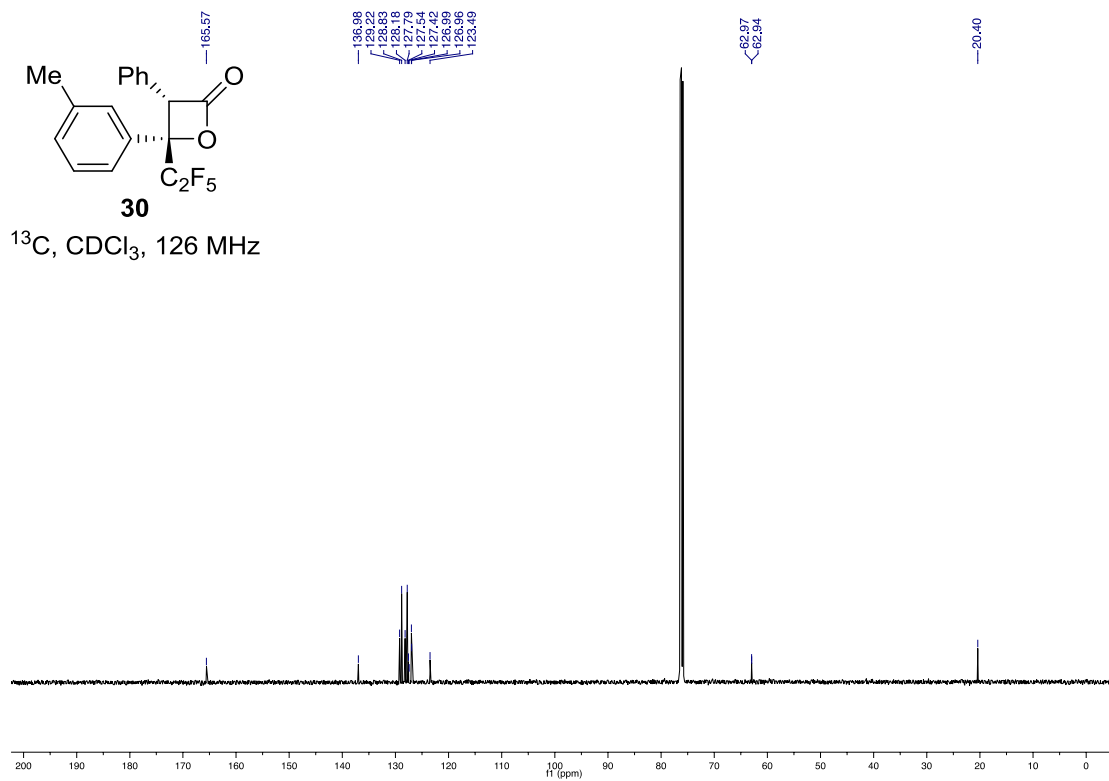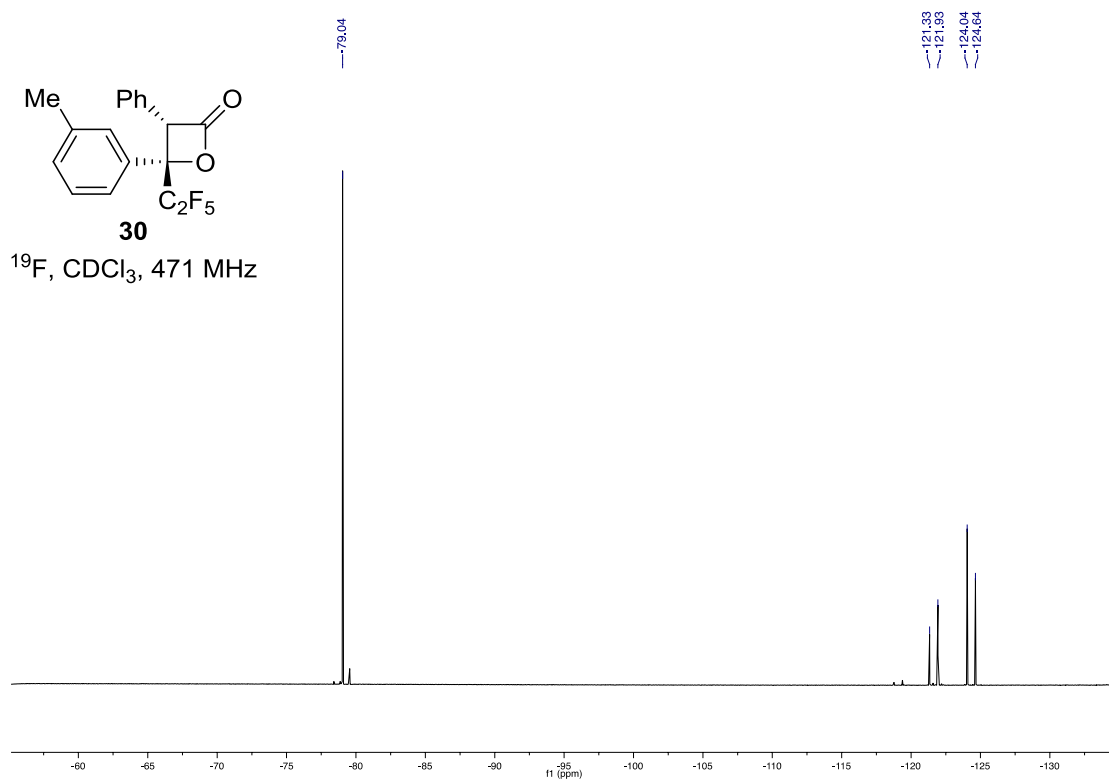

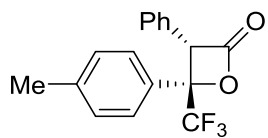

**32**

$^1\text{H}$ ,  $\text{CDCl}_3$ , 500 MHz

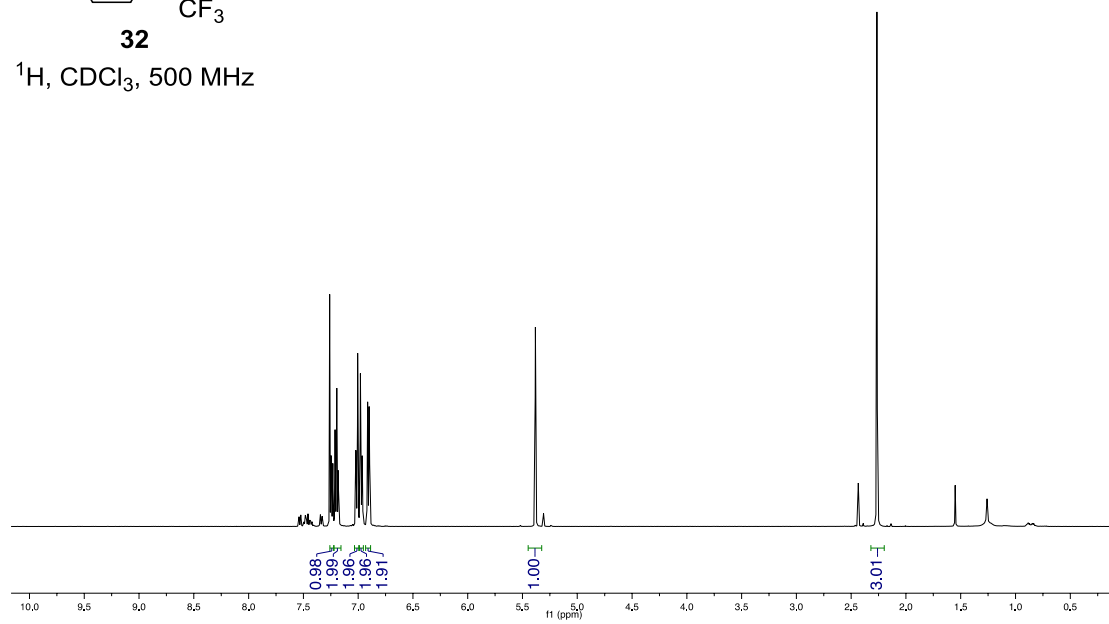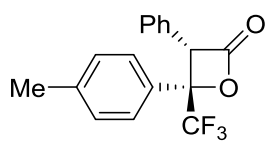

**32**

$^{13}\text{C}$ ,  $\text{CDCl}_3$ , 126 MHz

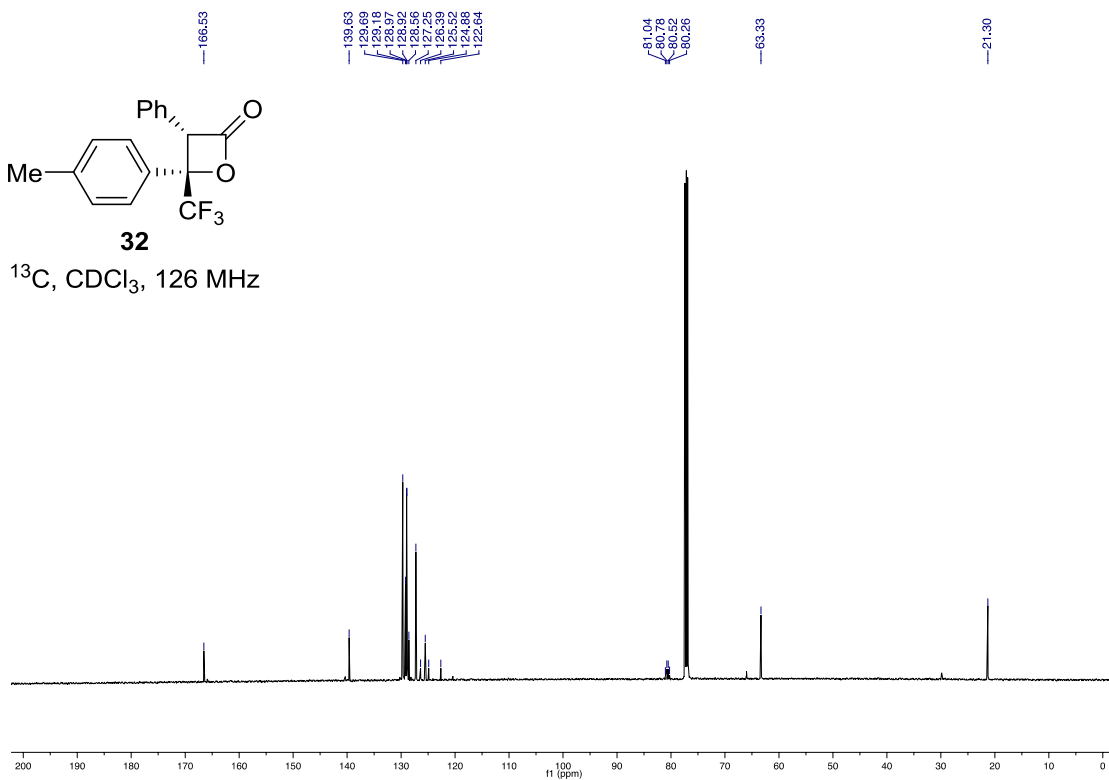



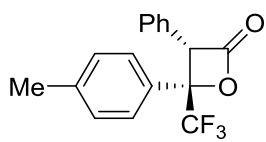

**32**

$^{19}\text{F}$ ,  $\text{CDCl}_3$ , 471 MHz

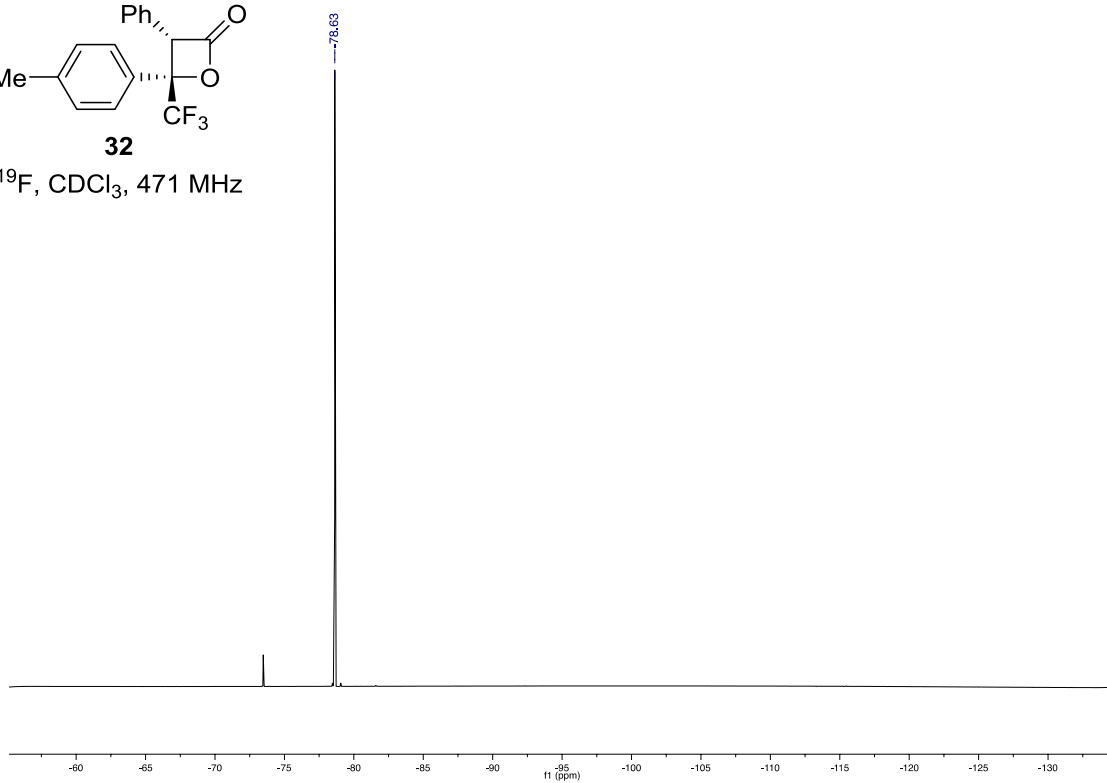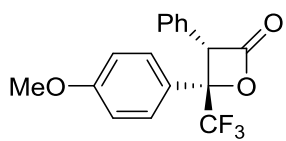

**33**

$^1\text{H}$ ,  $\text{CDCl}_3$ , 500 MHz

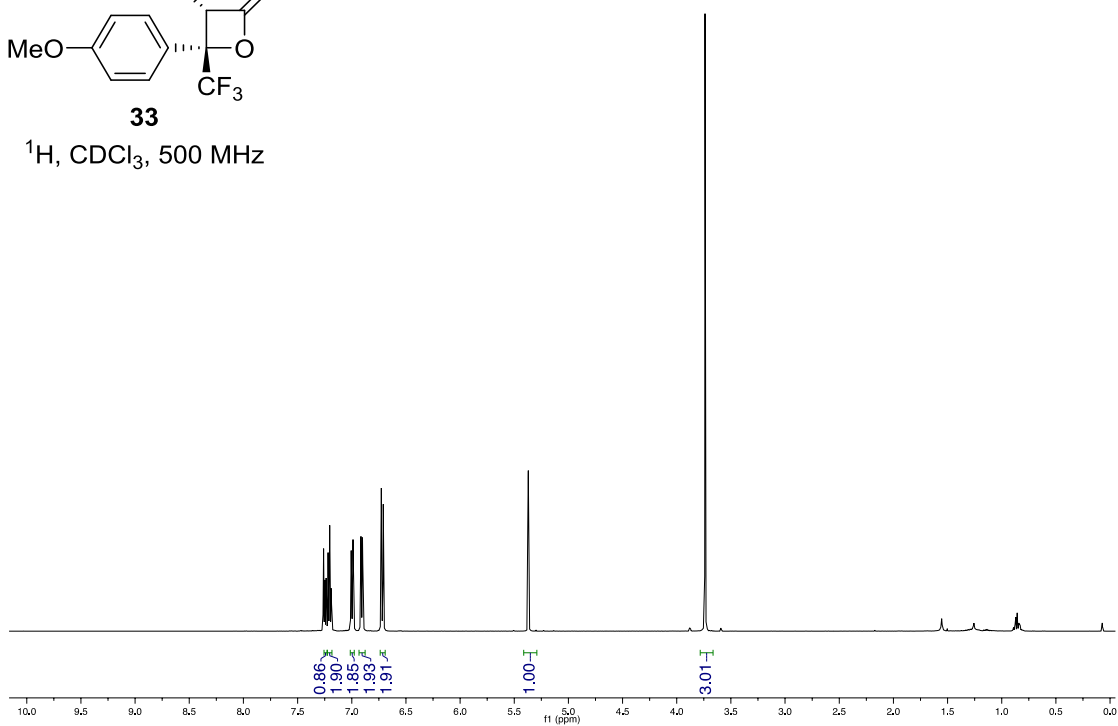

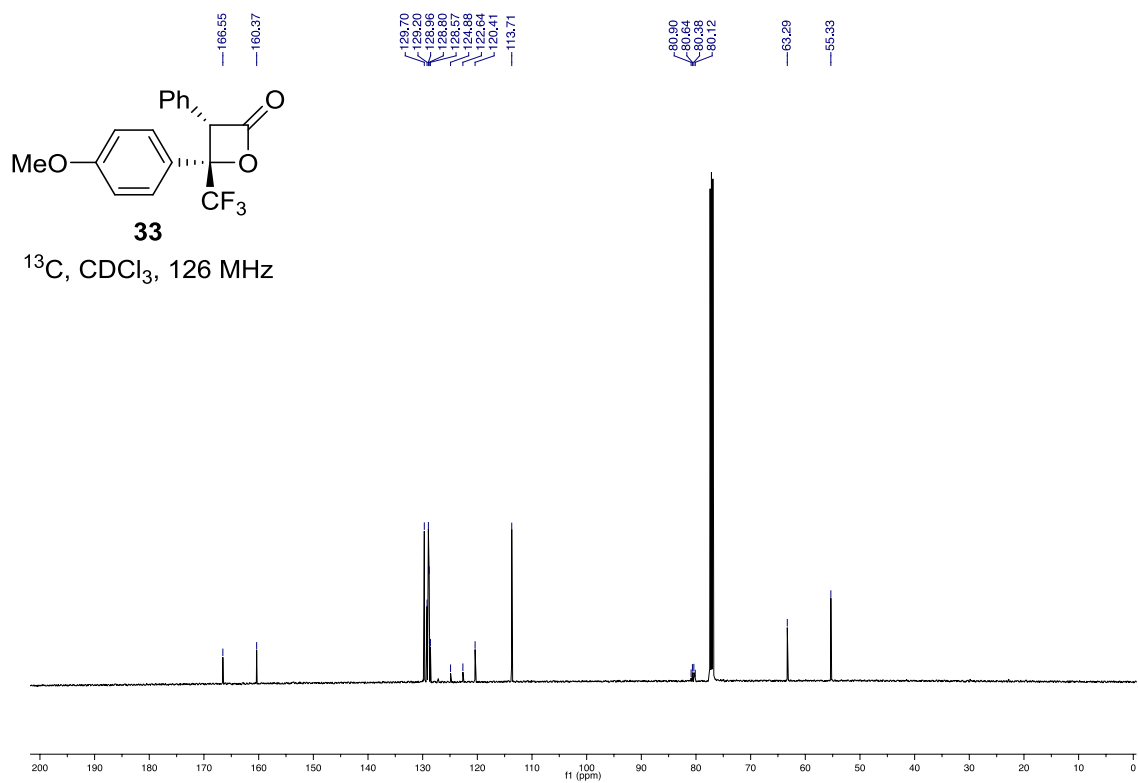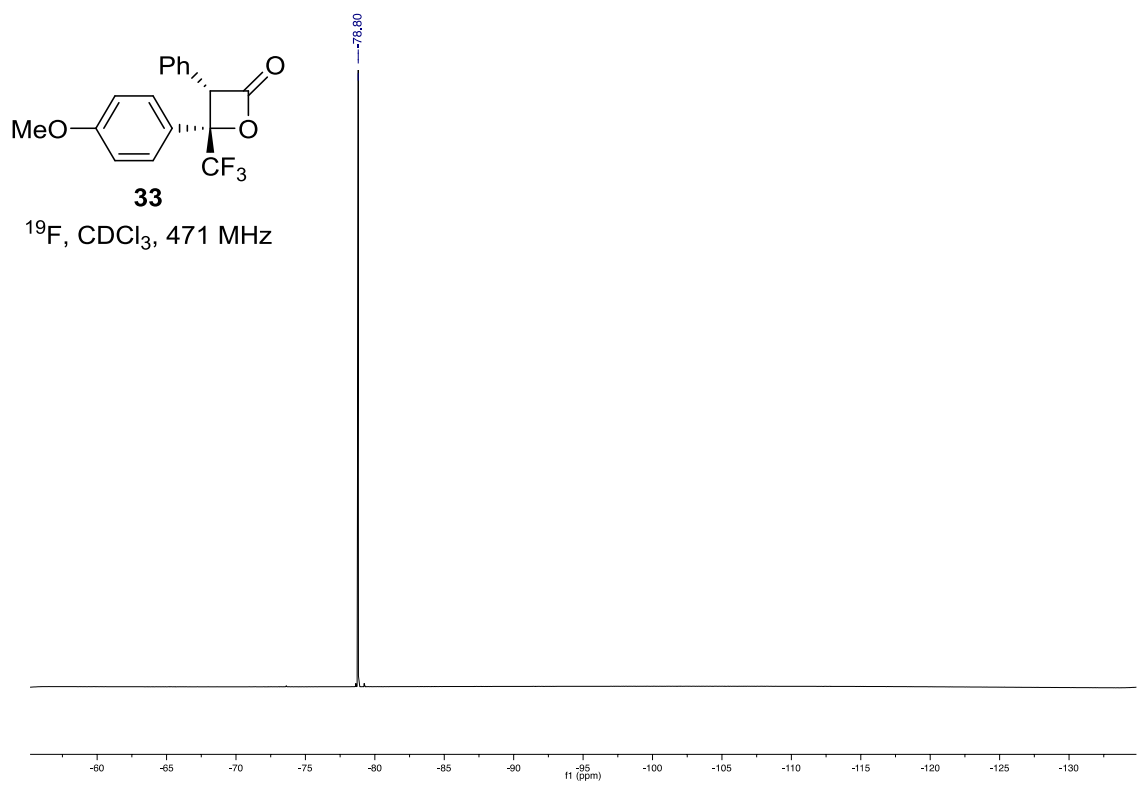

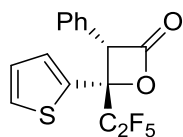

**34**

$^1\text{H}$ ,  $\text{CDCl}_3$ , 500 MHz

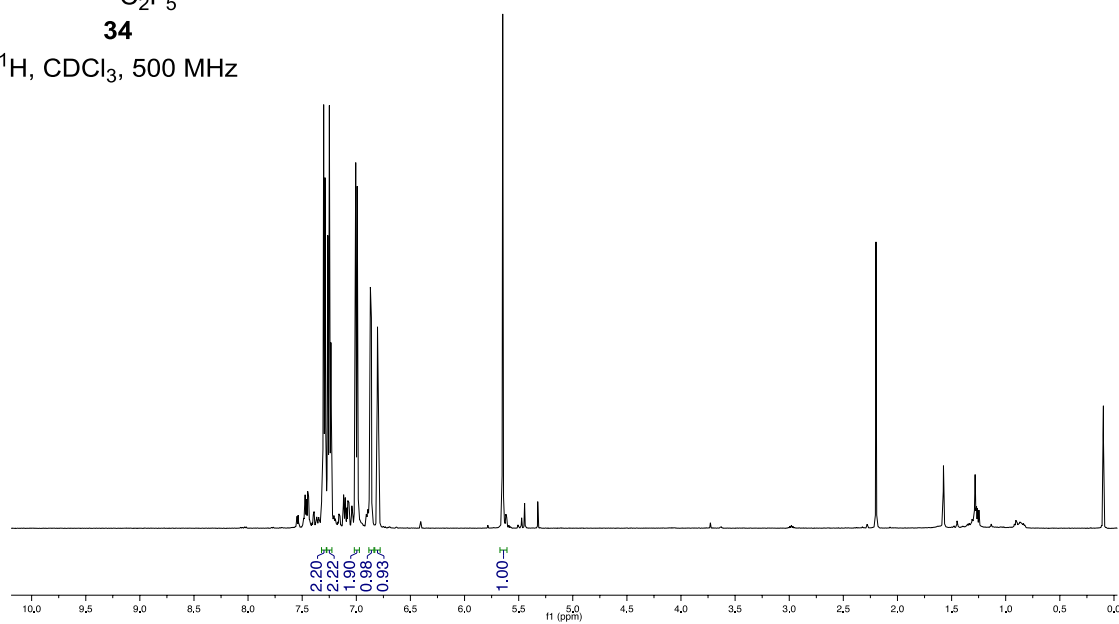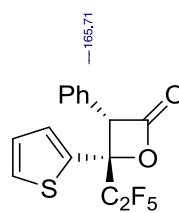

**34**

$^{13}\text{C}$ ,  $\text{CDCl}_3$ , 126 MHz

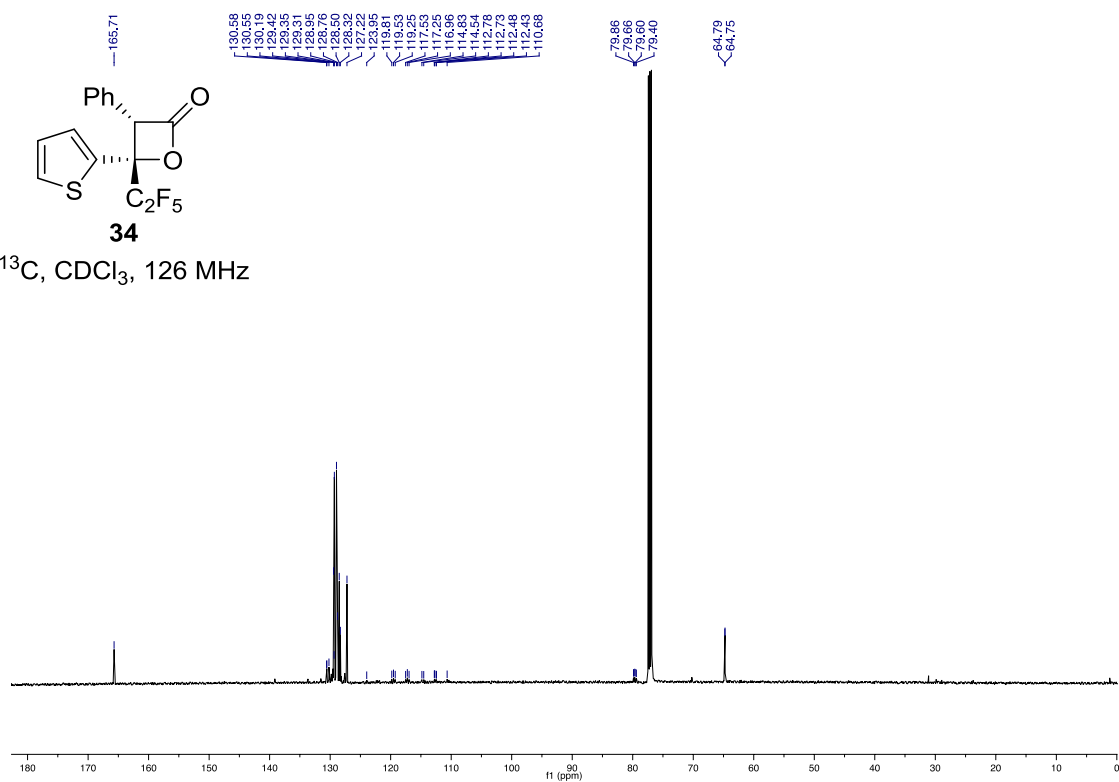

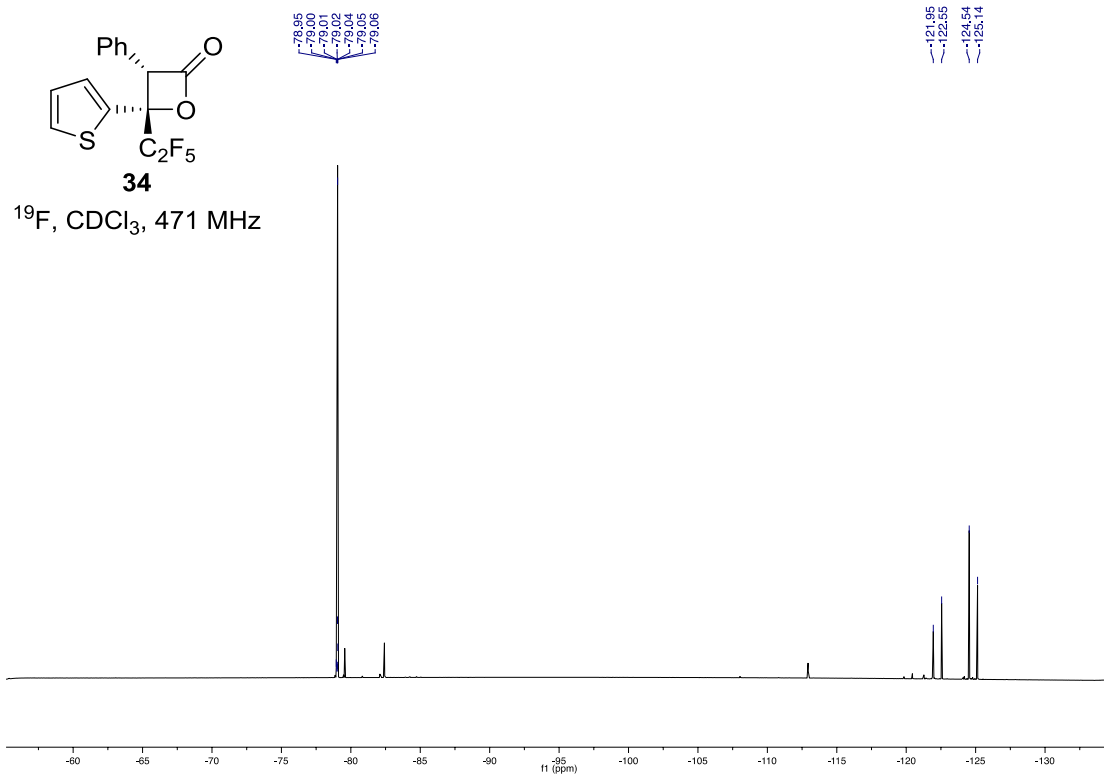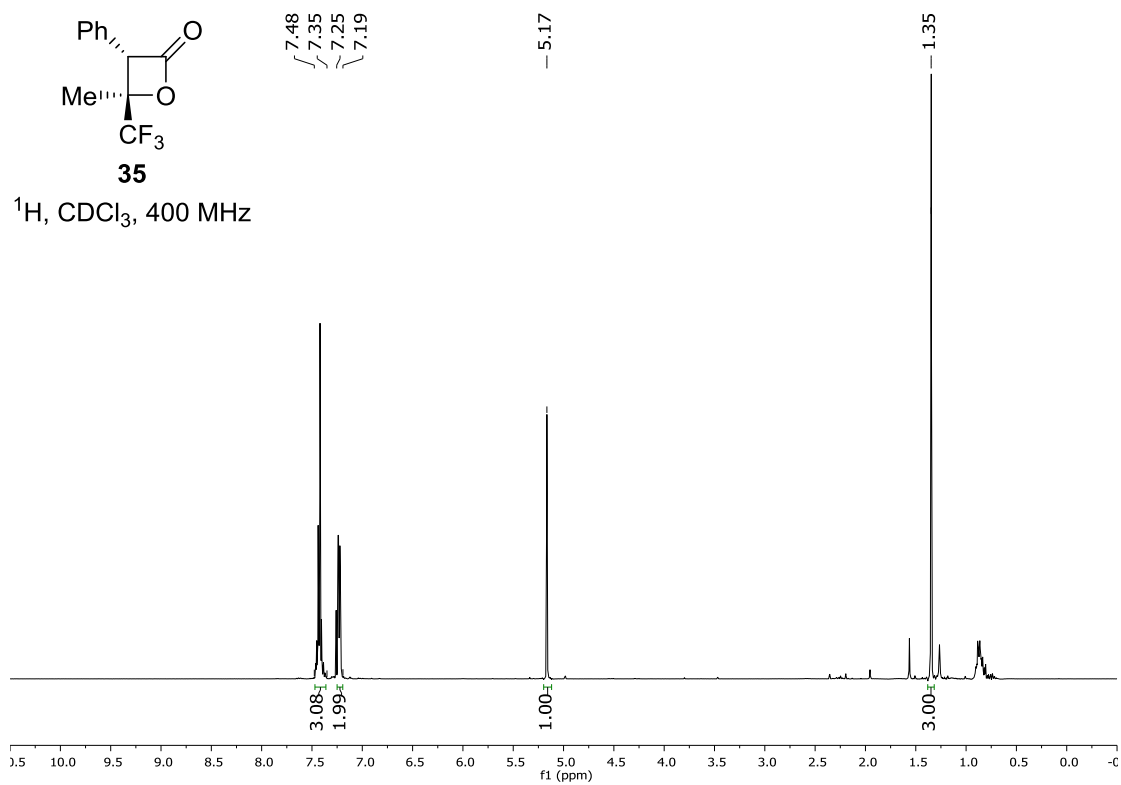

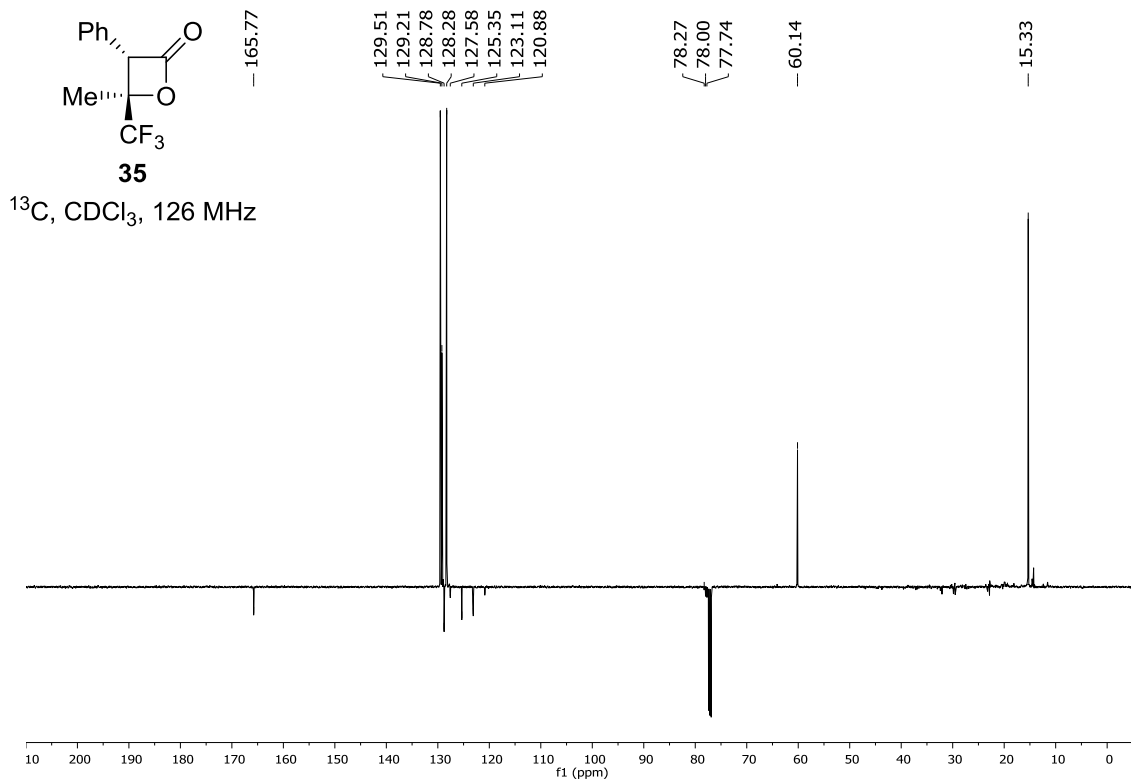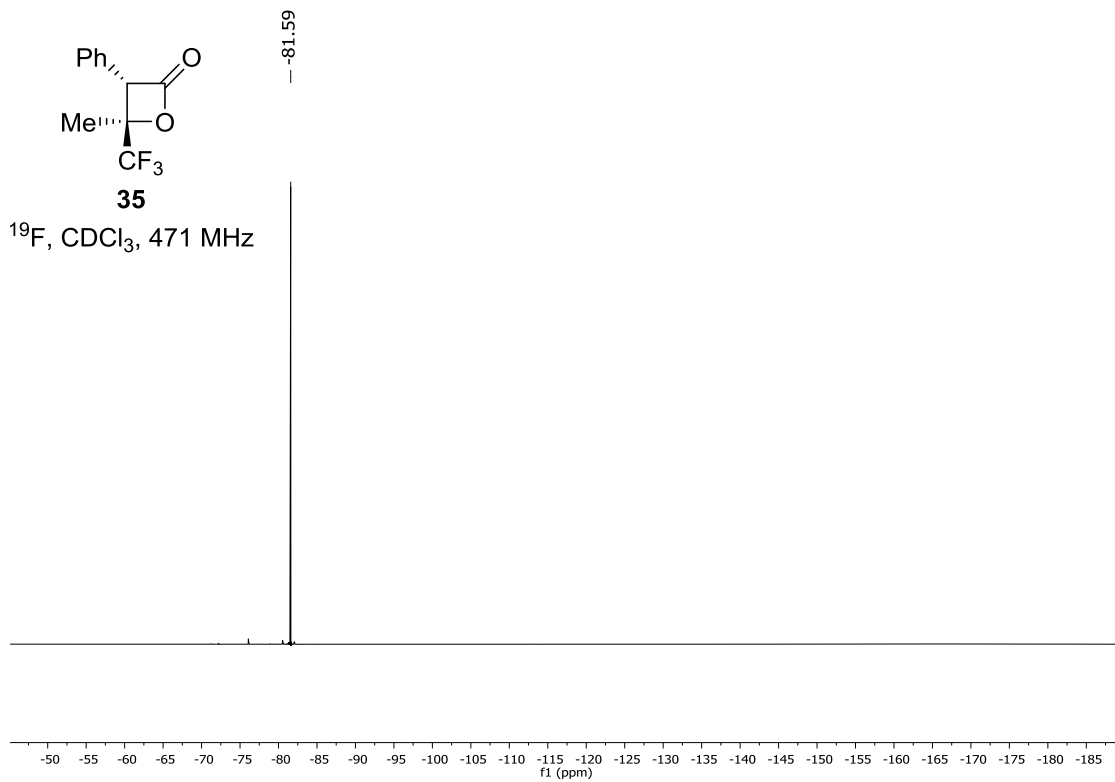

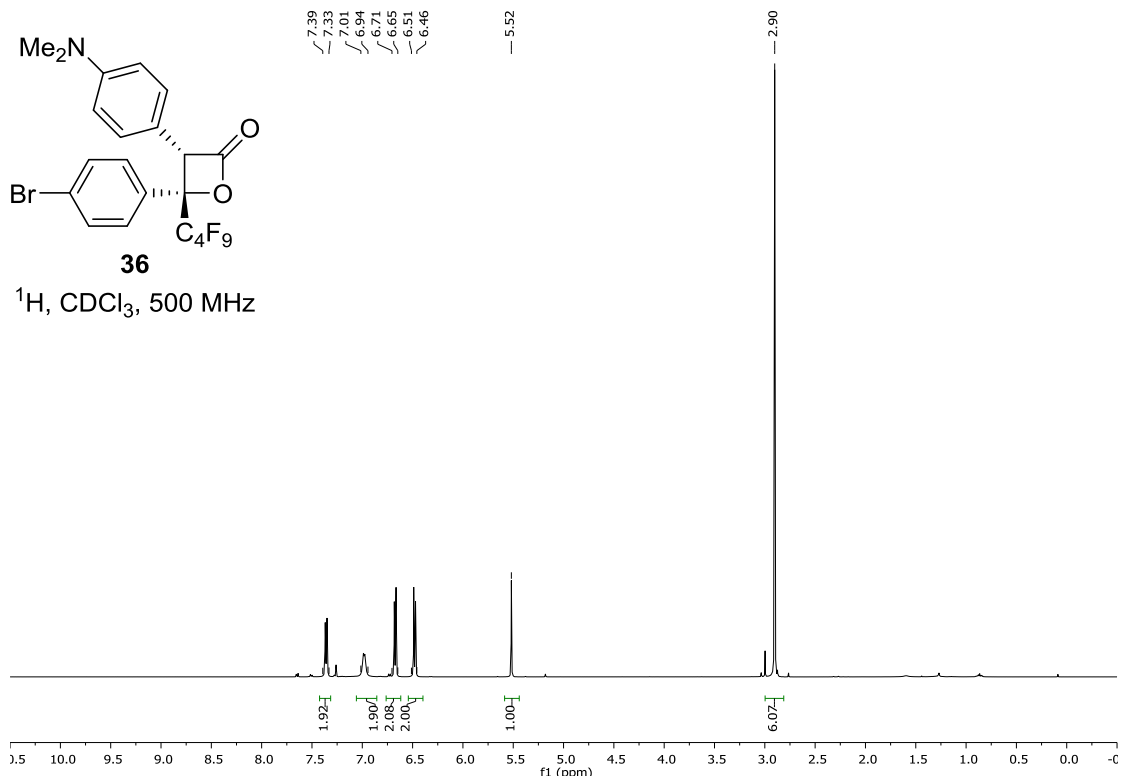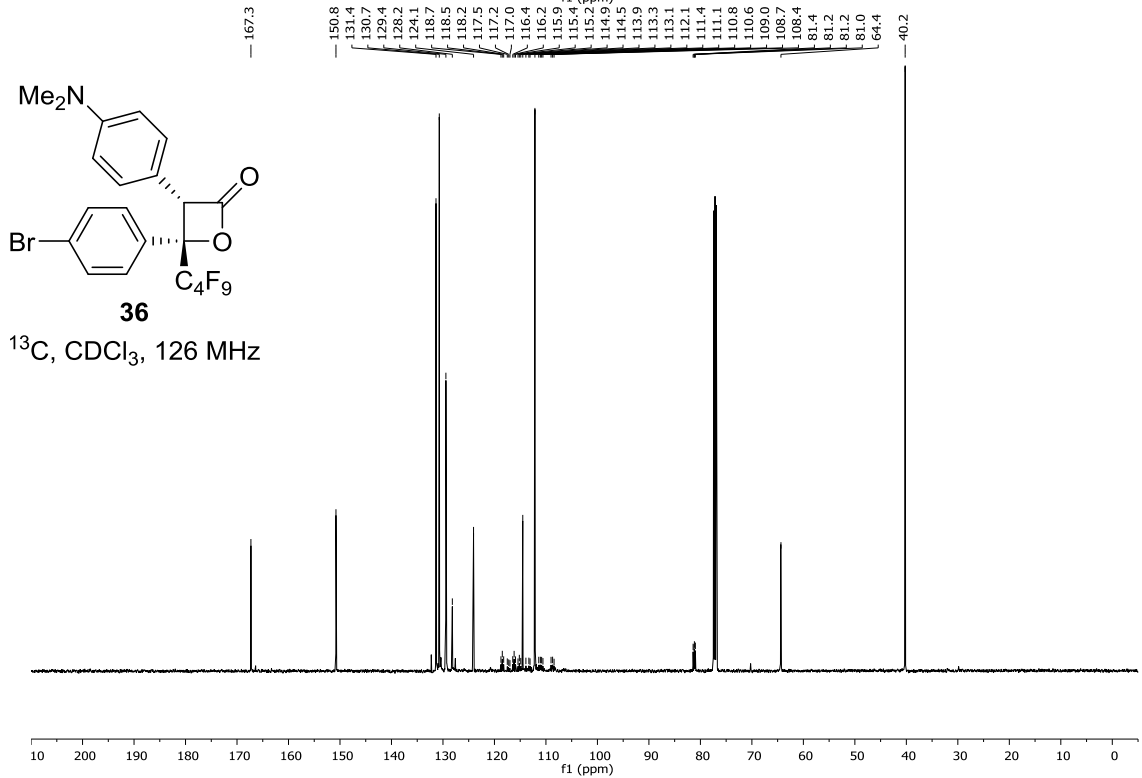

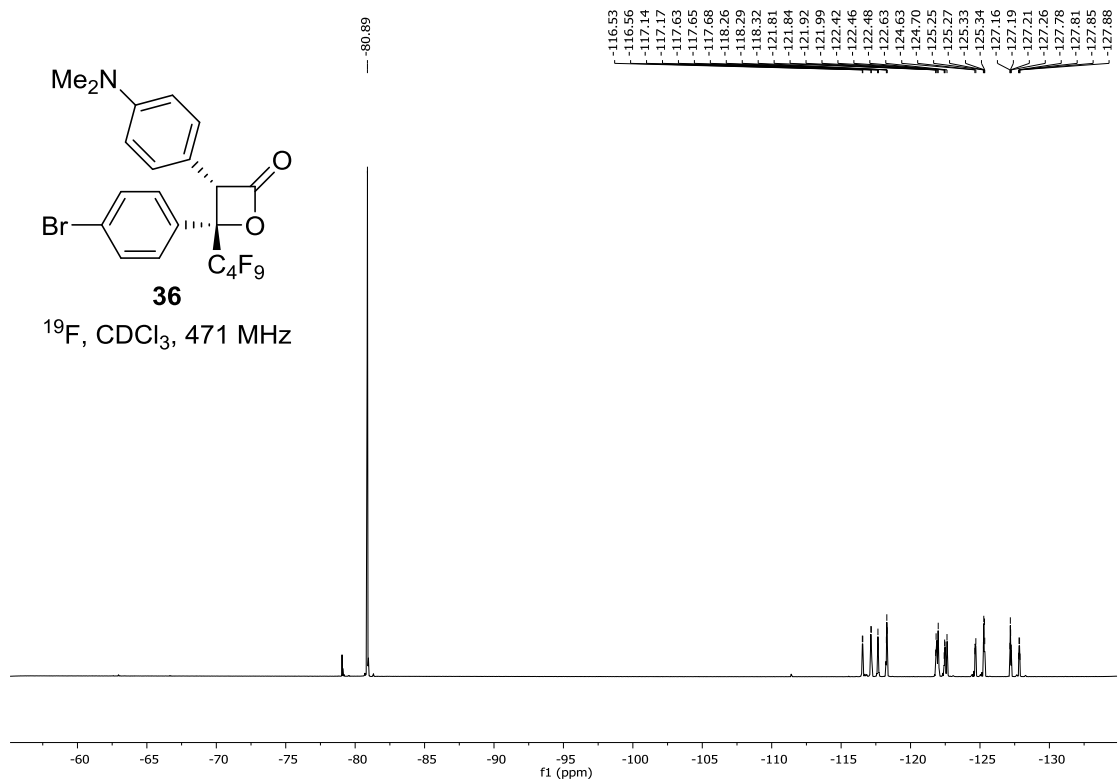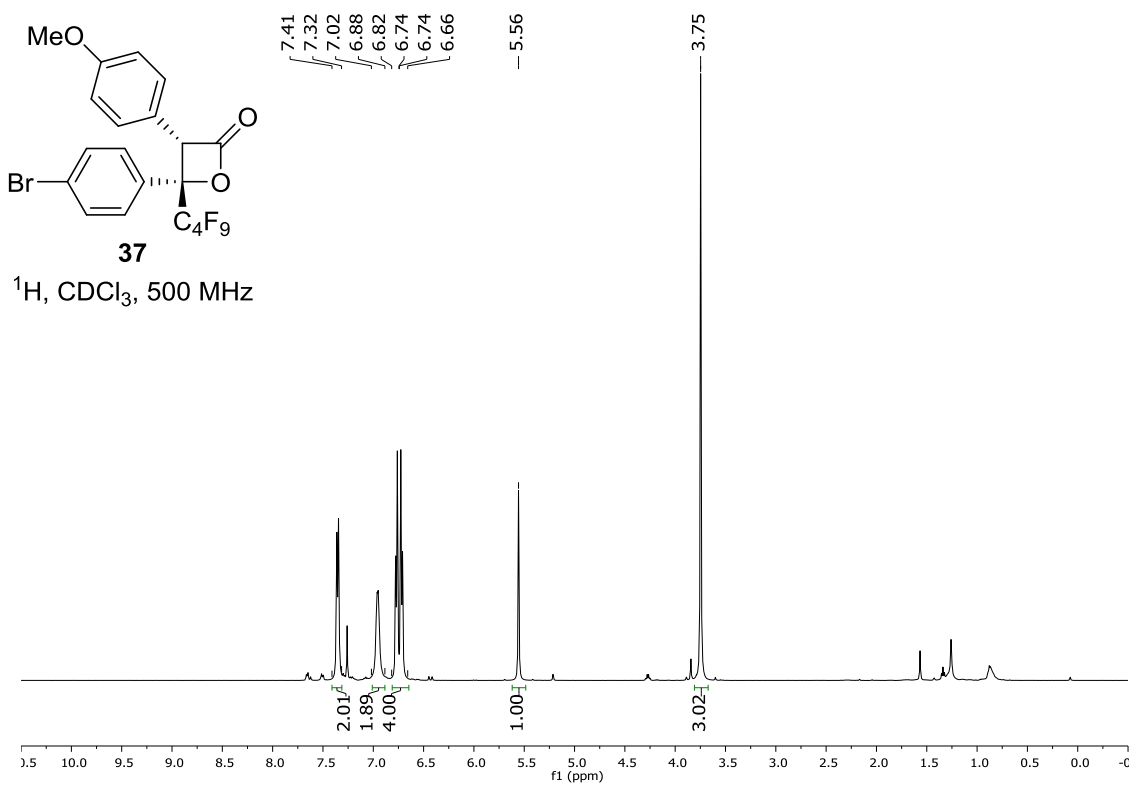

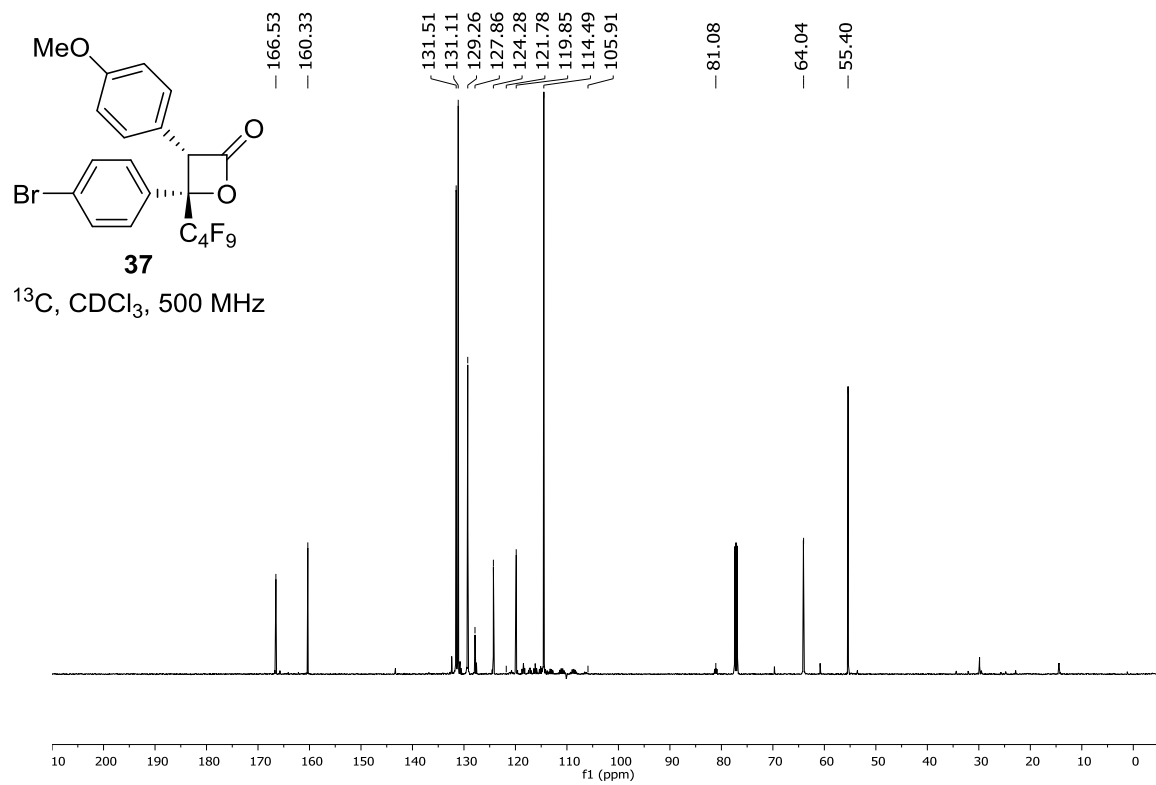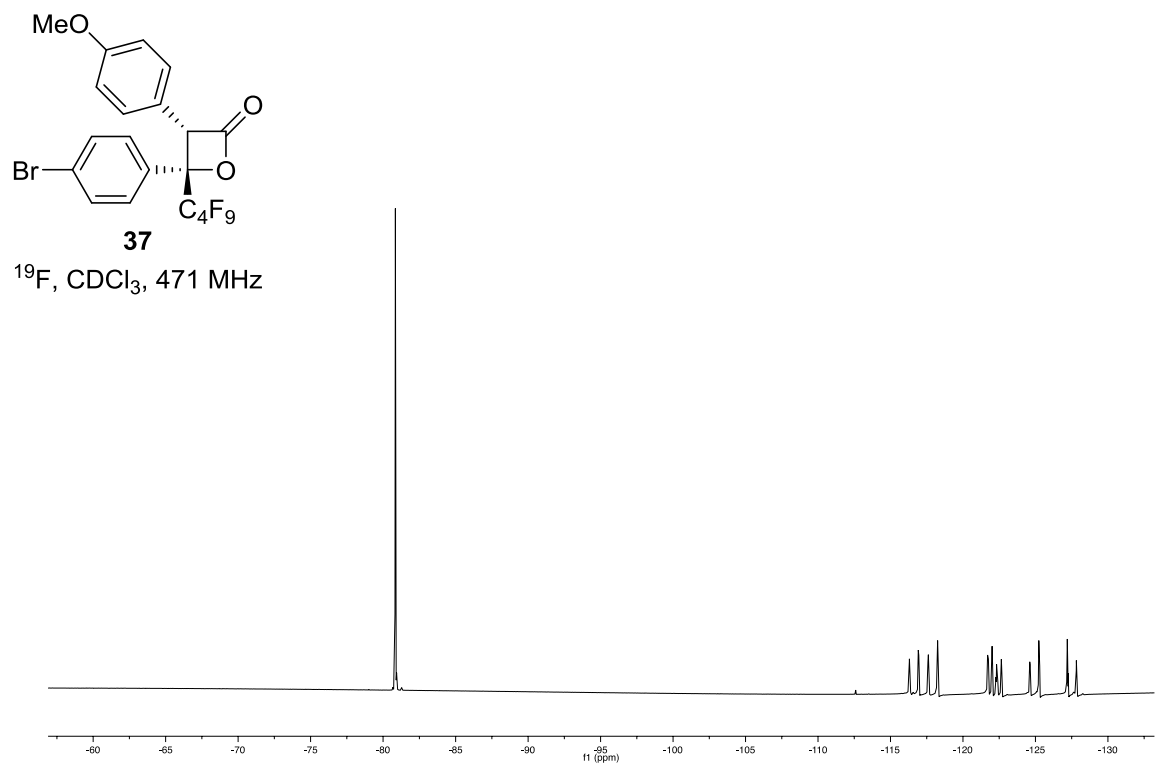



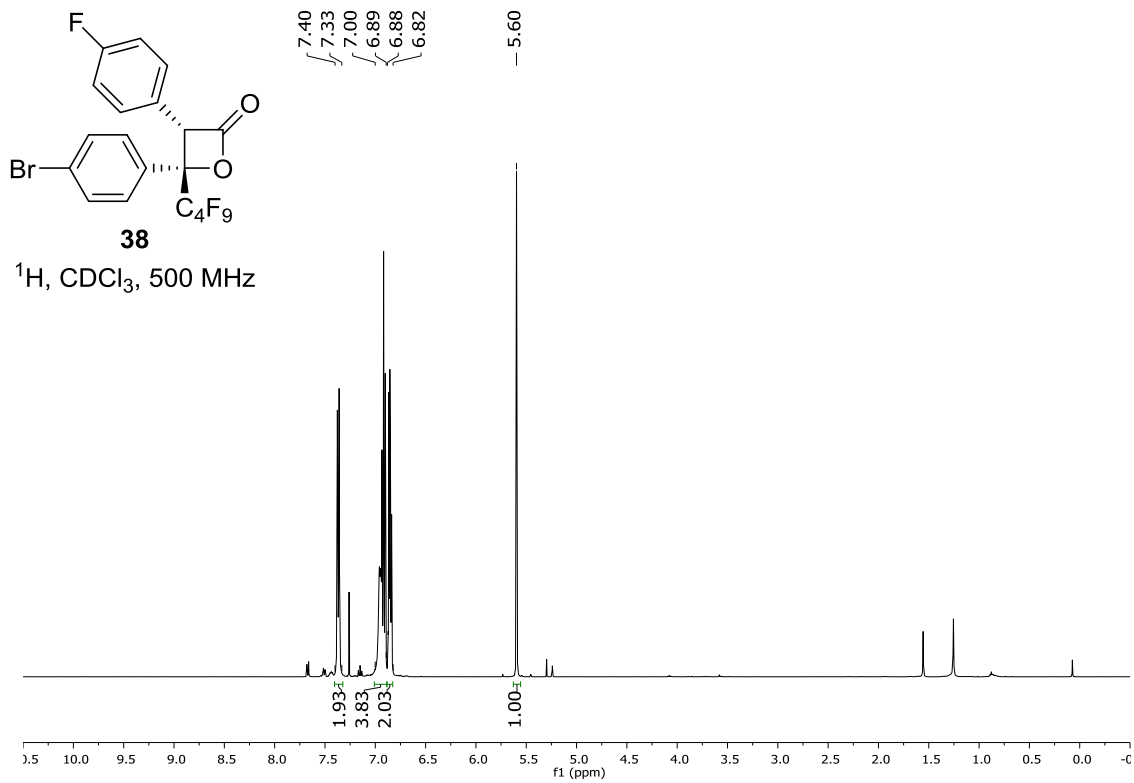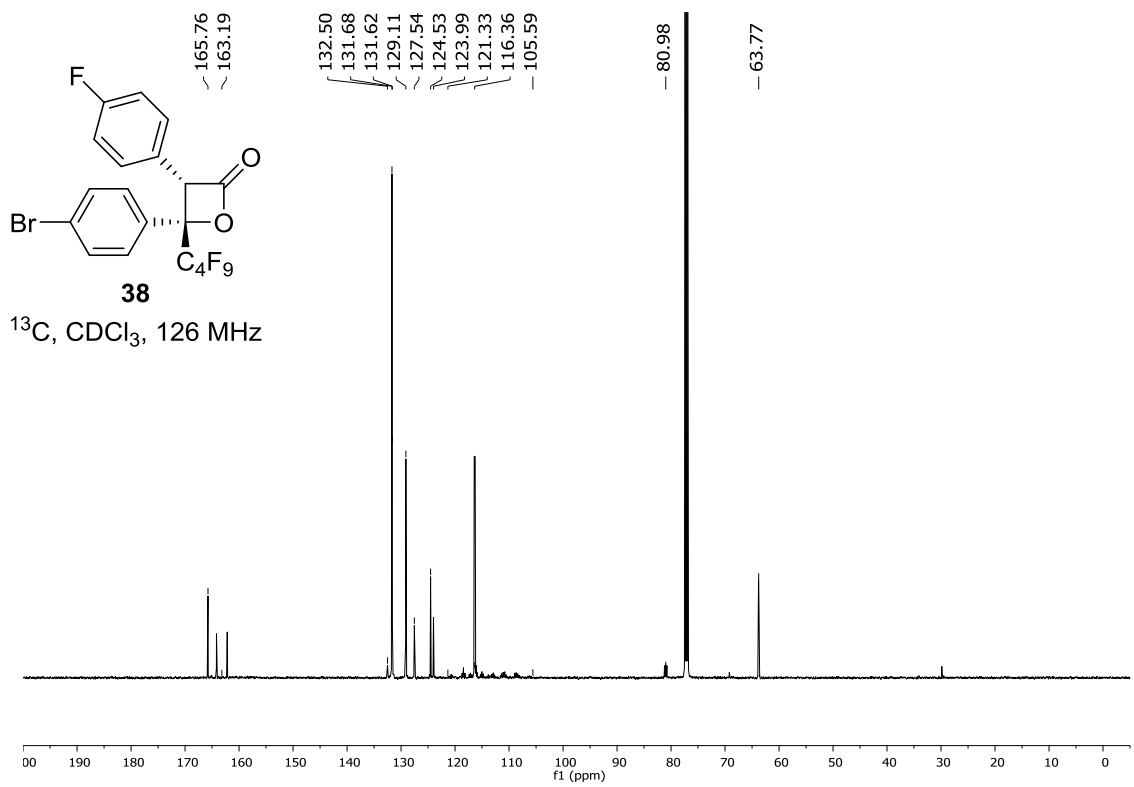

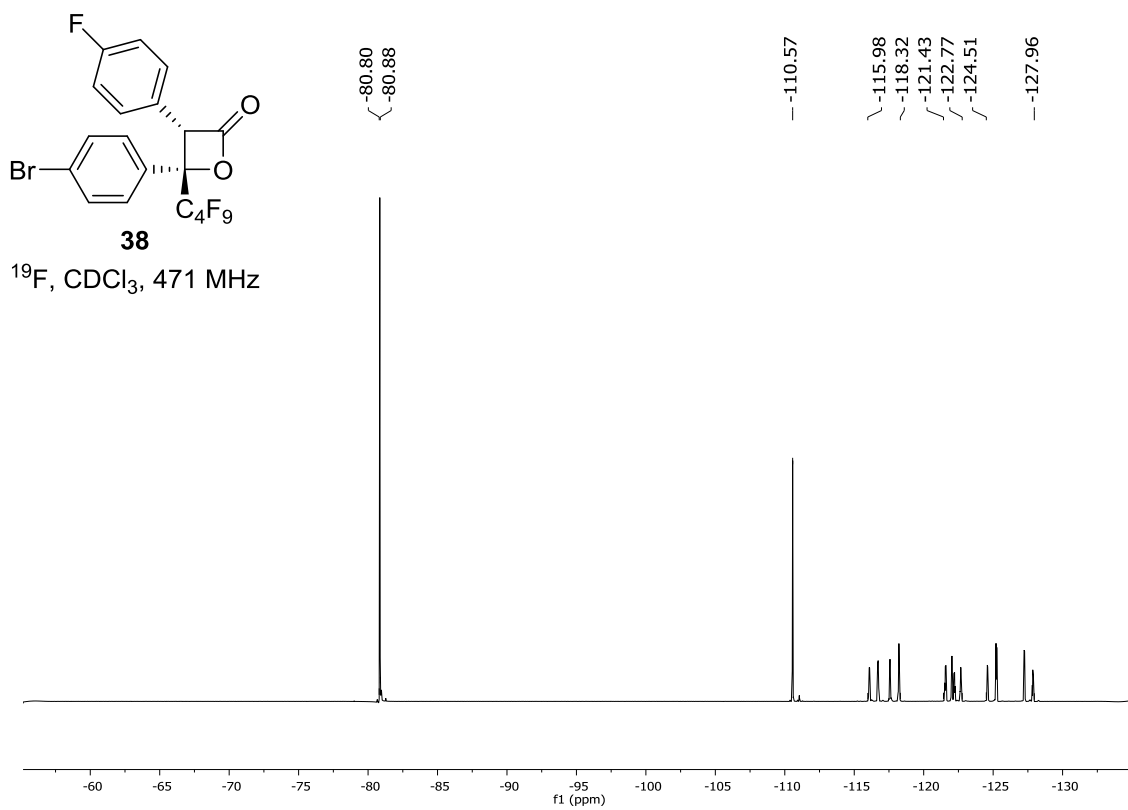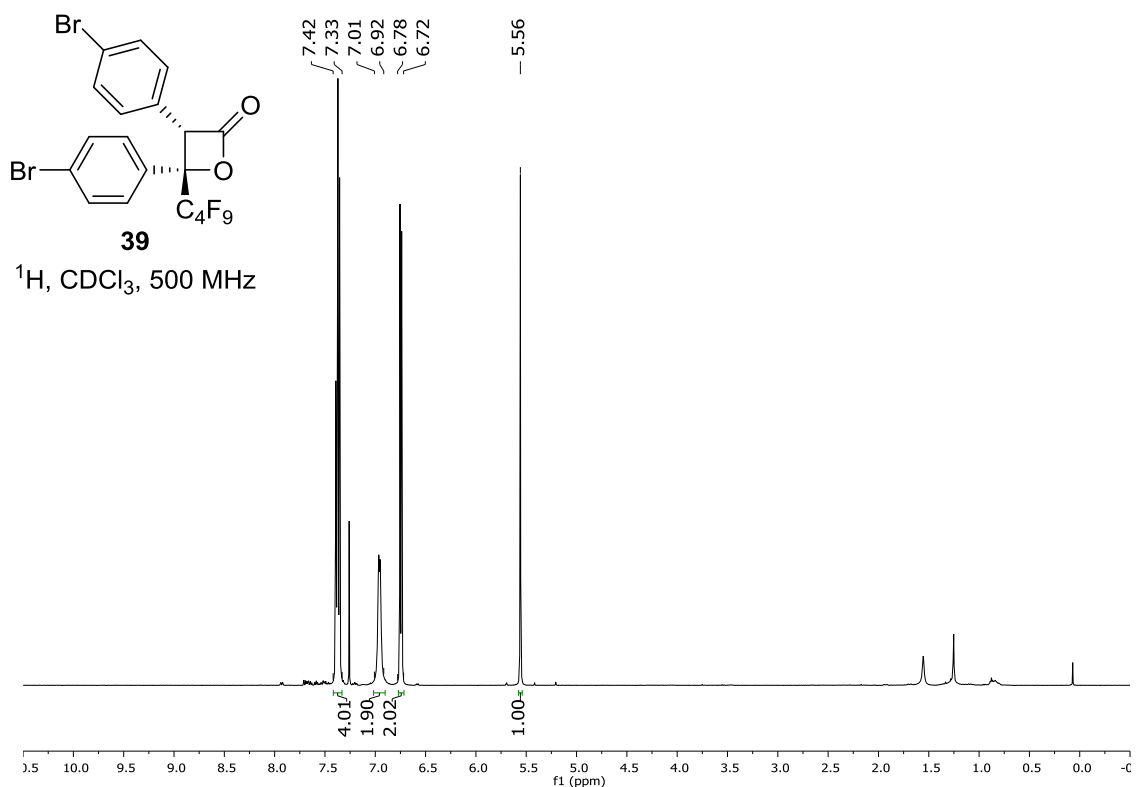

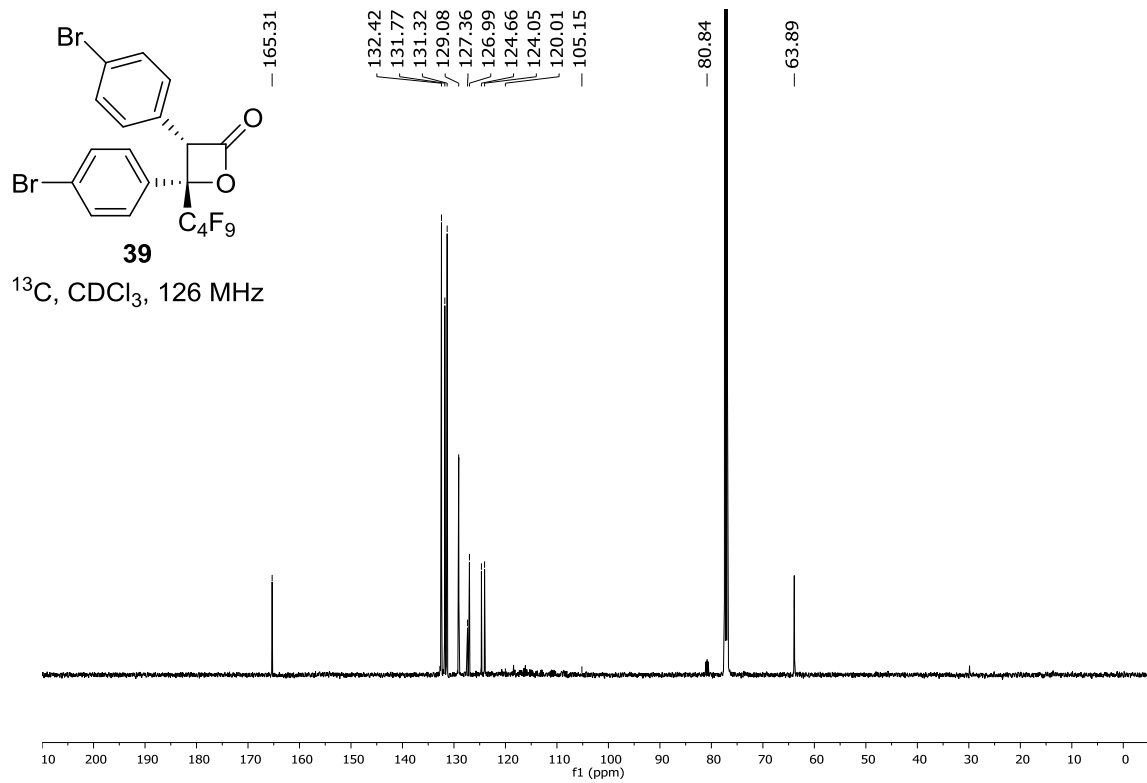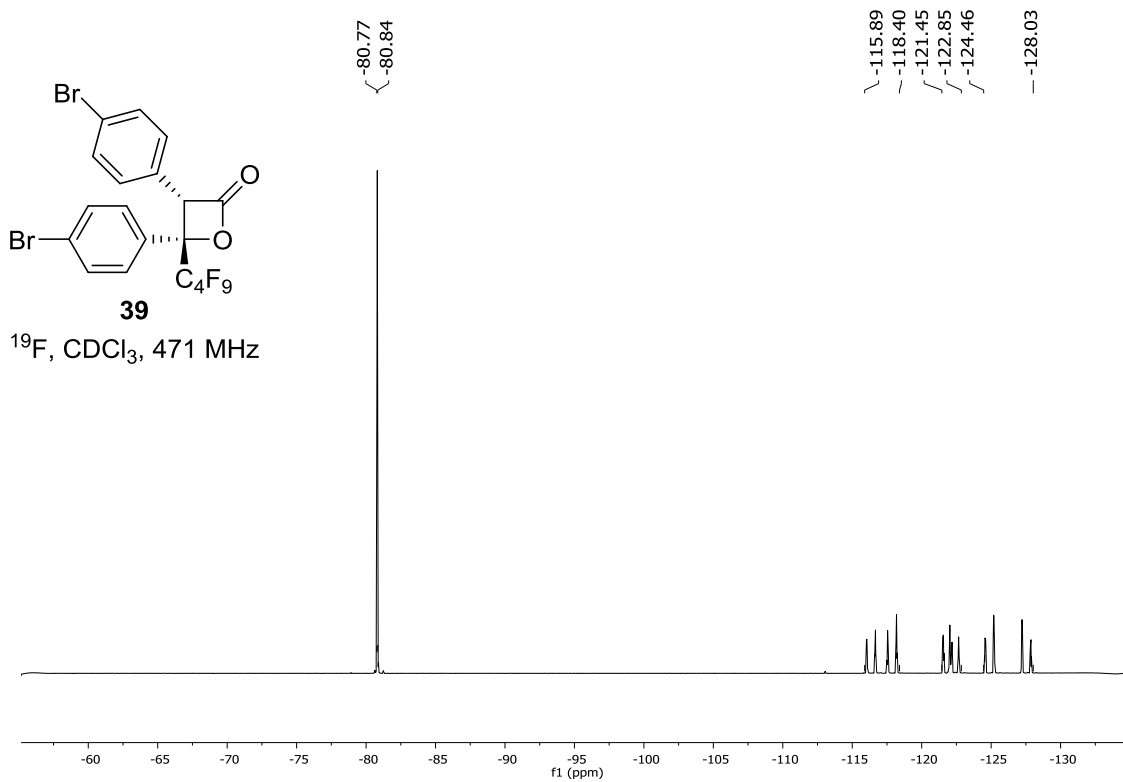

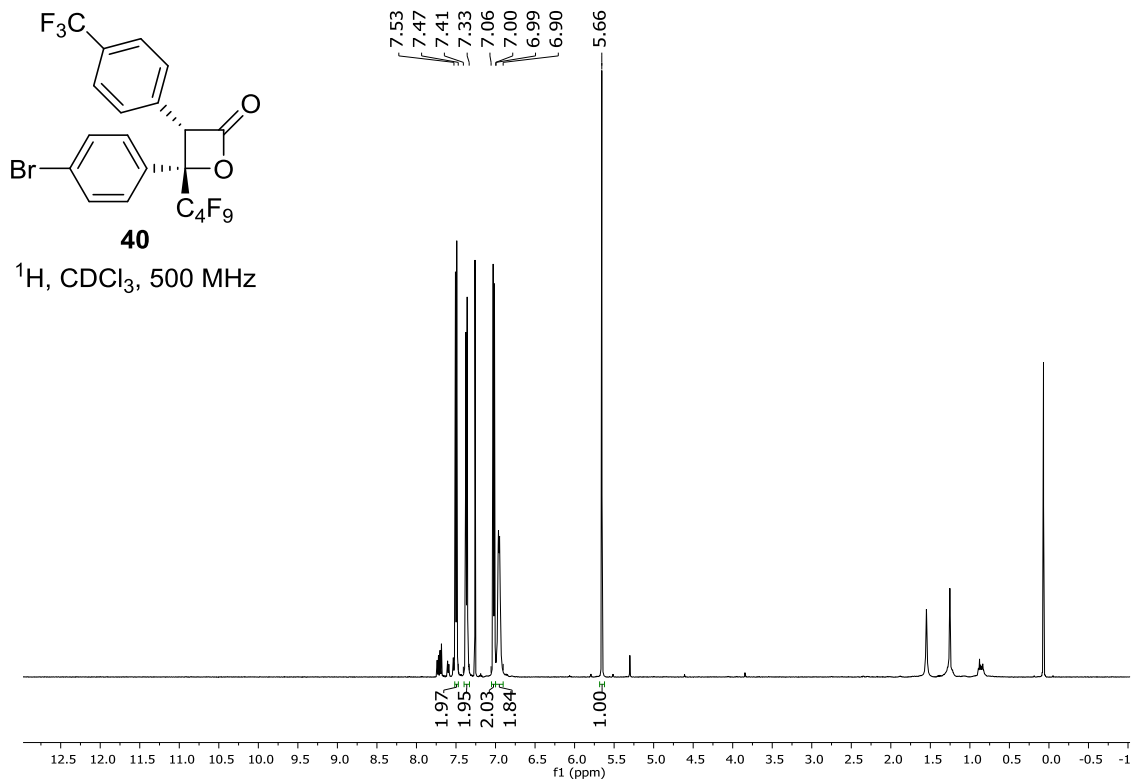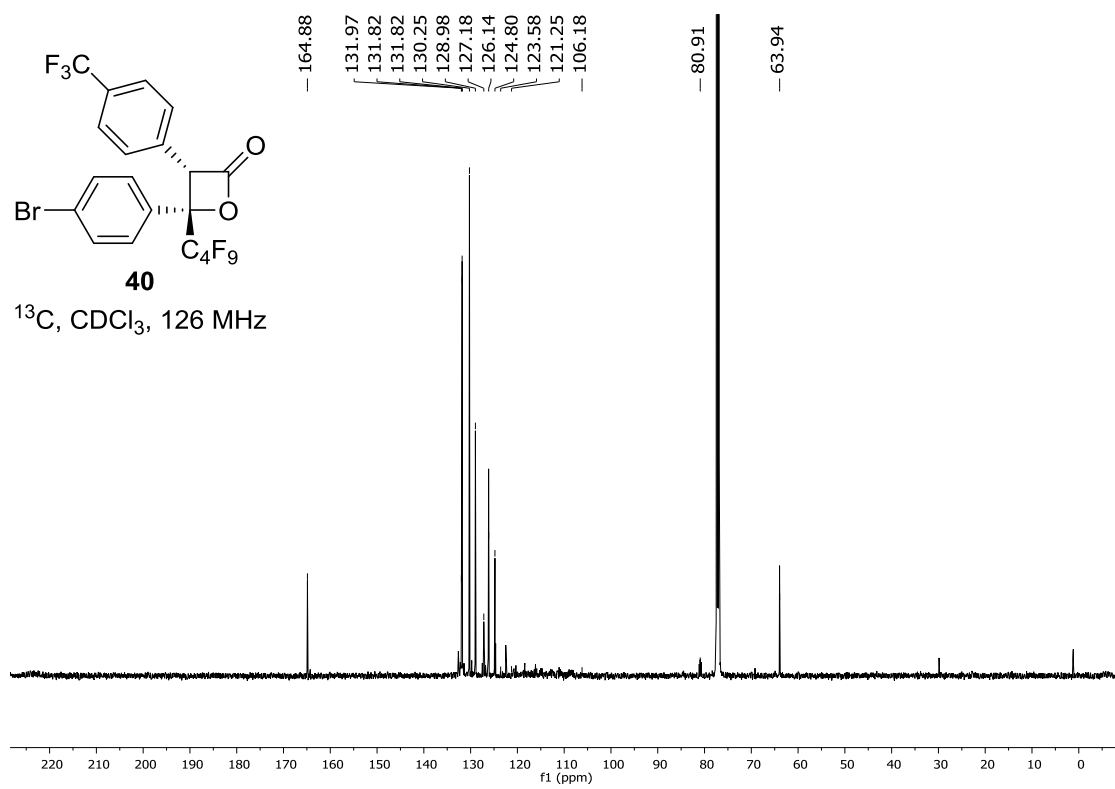

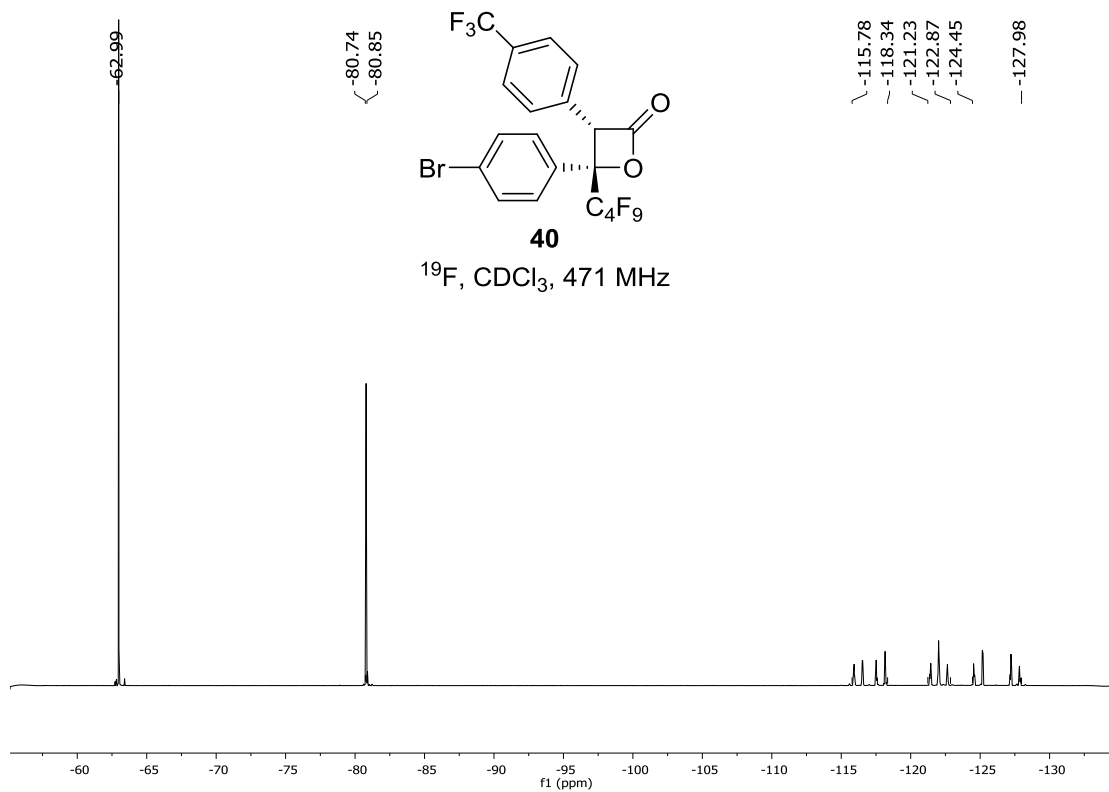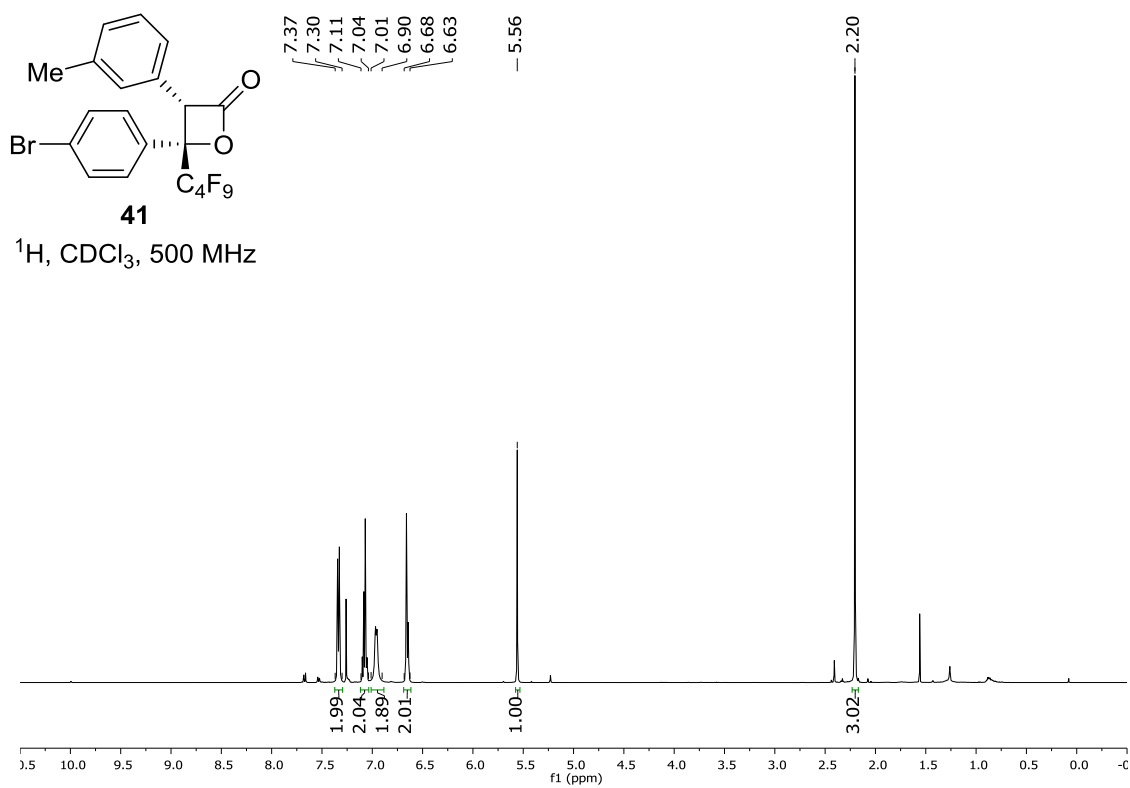

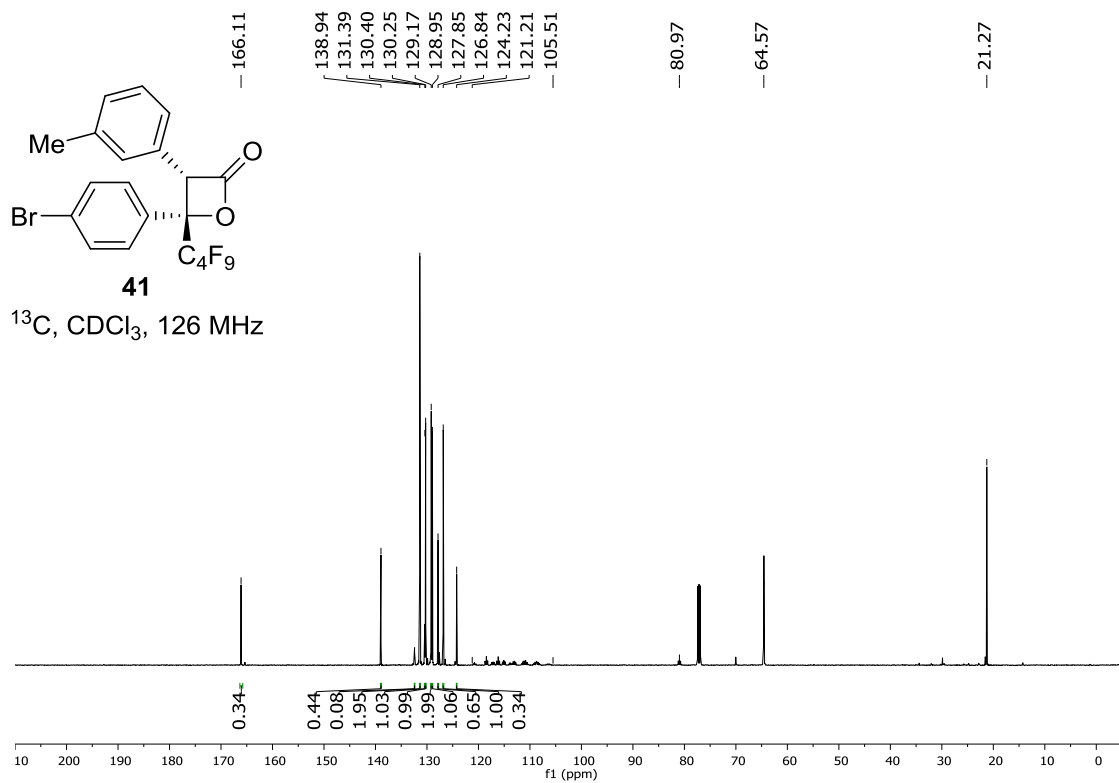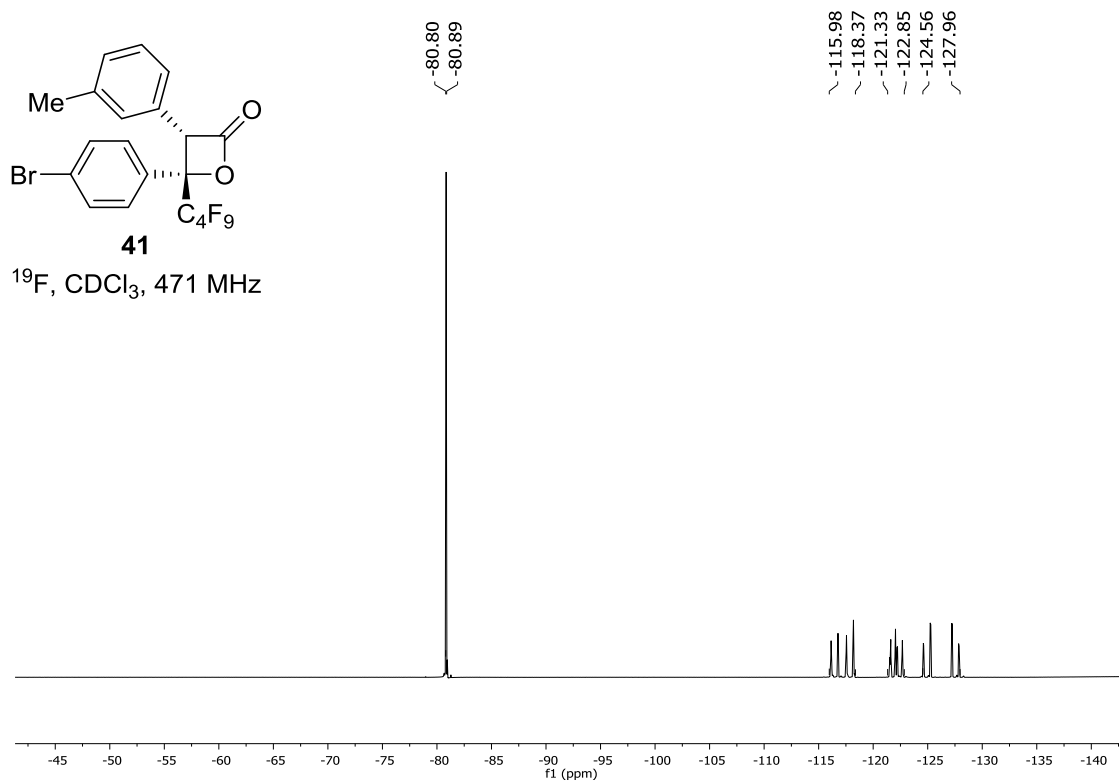

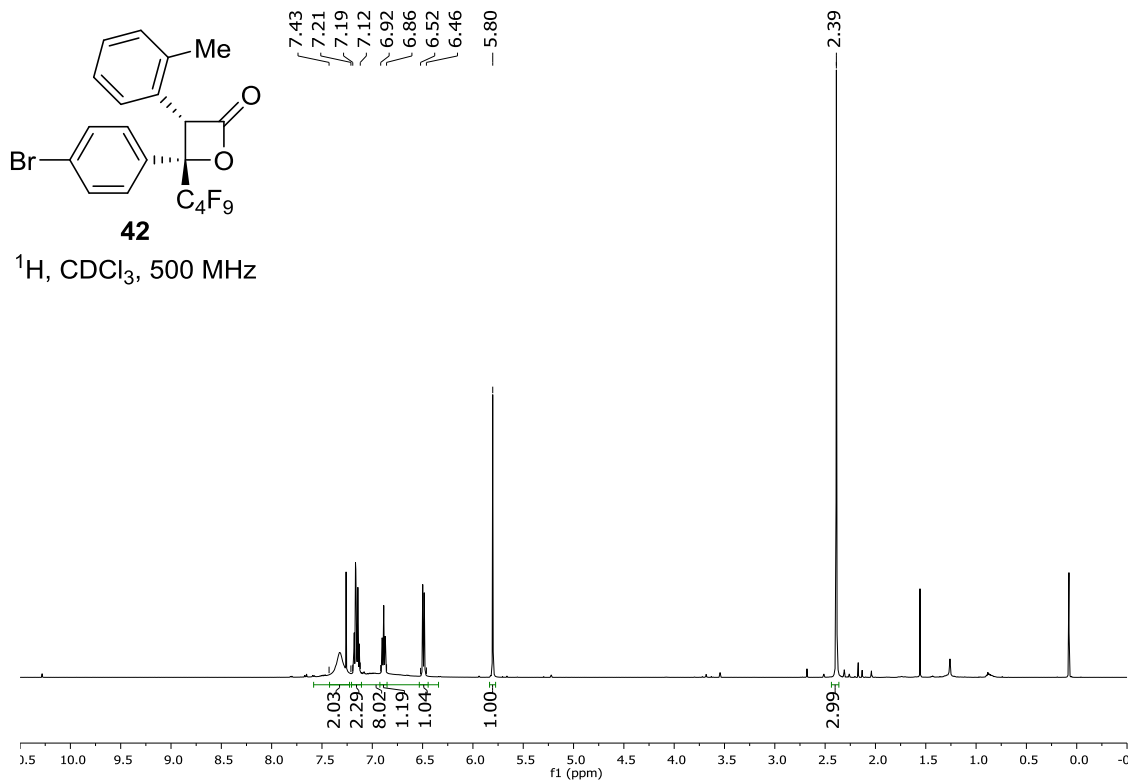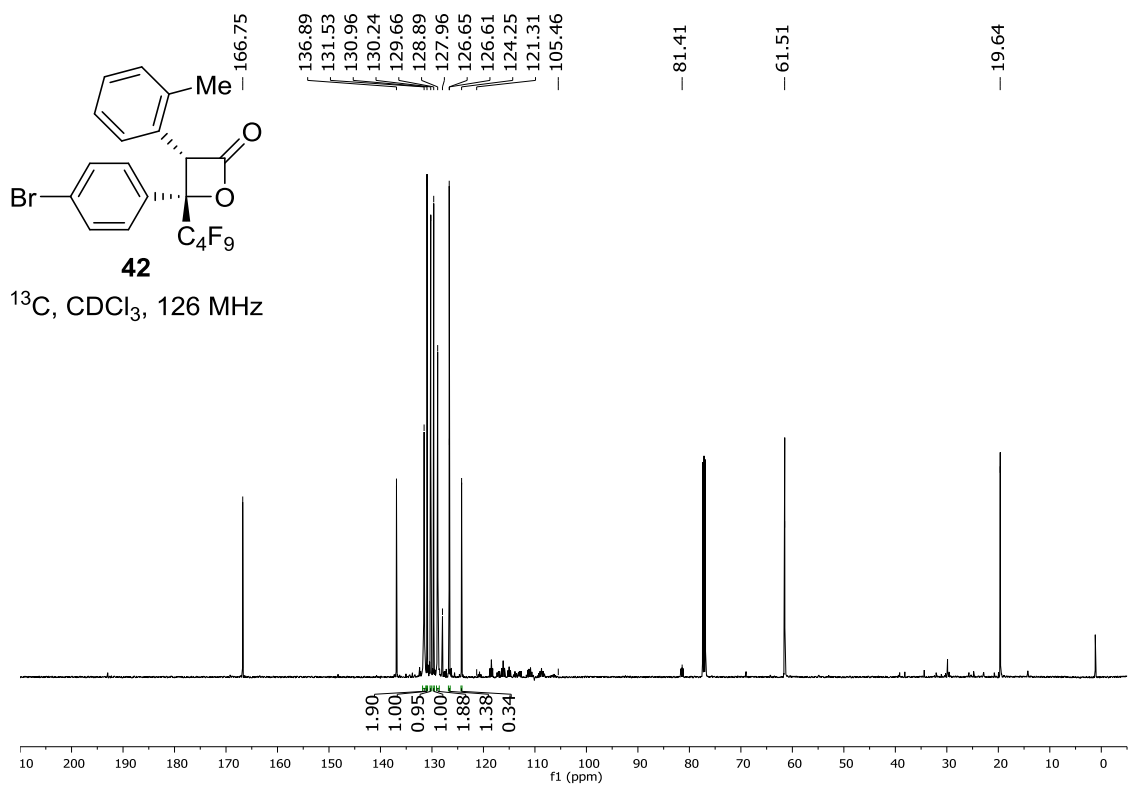

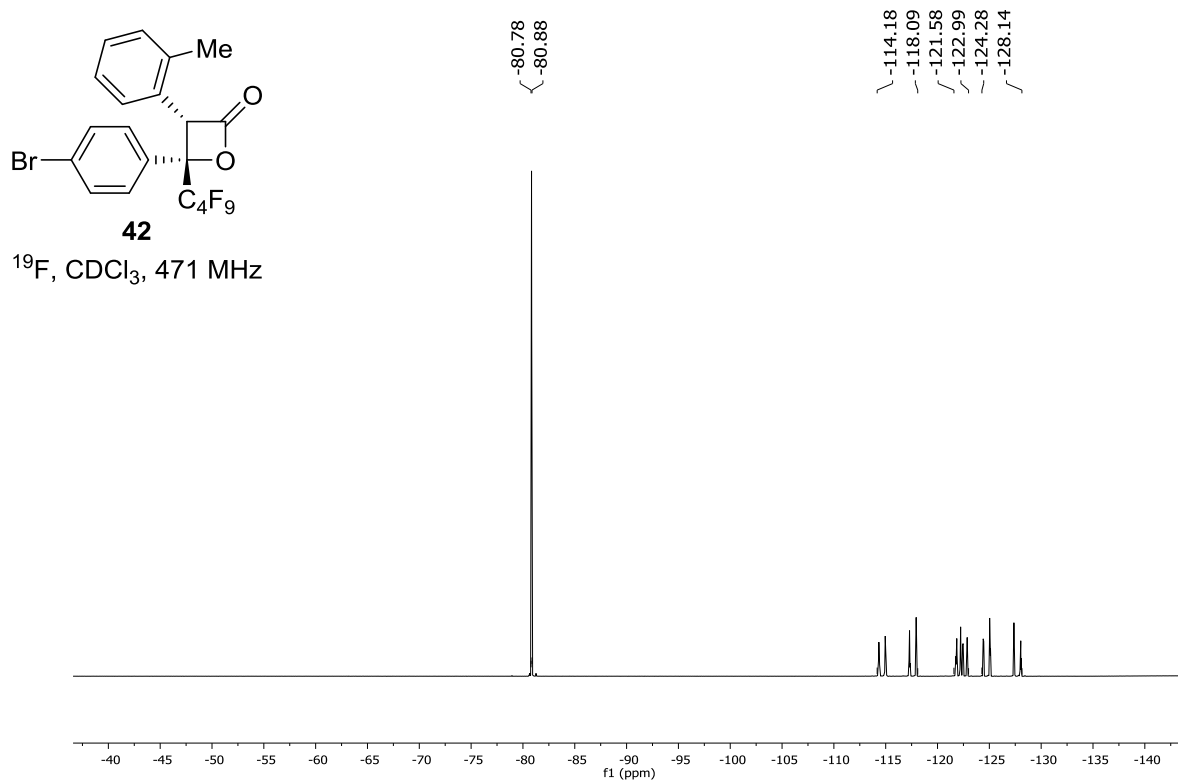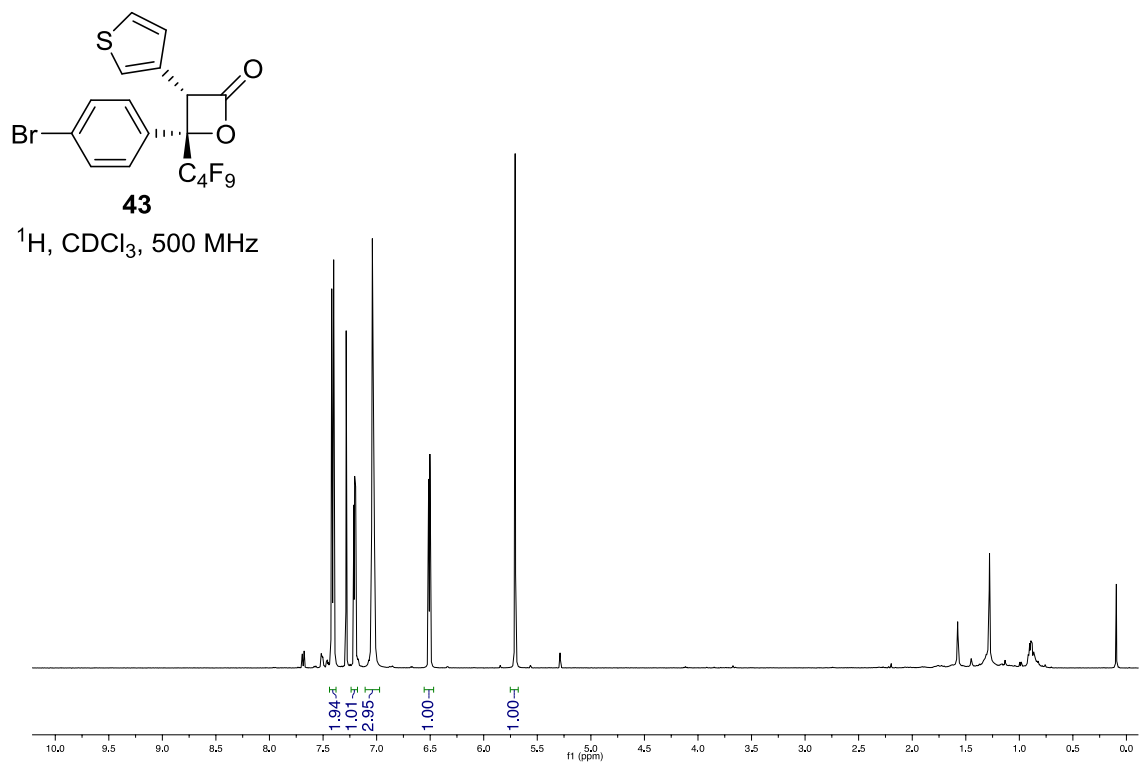



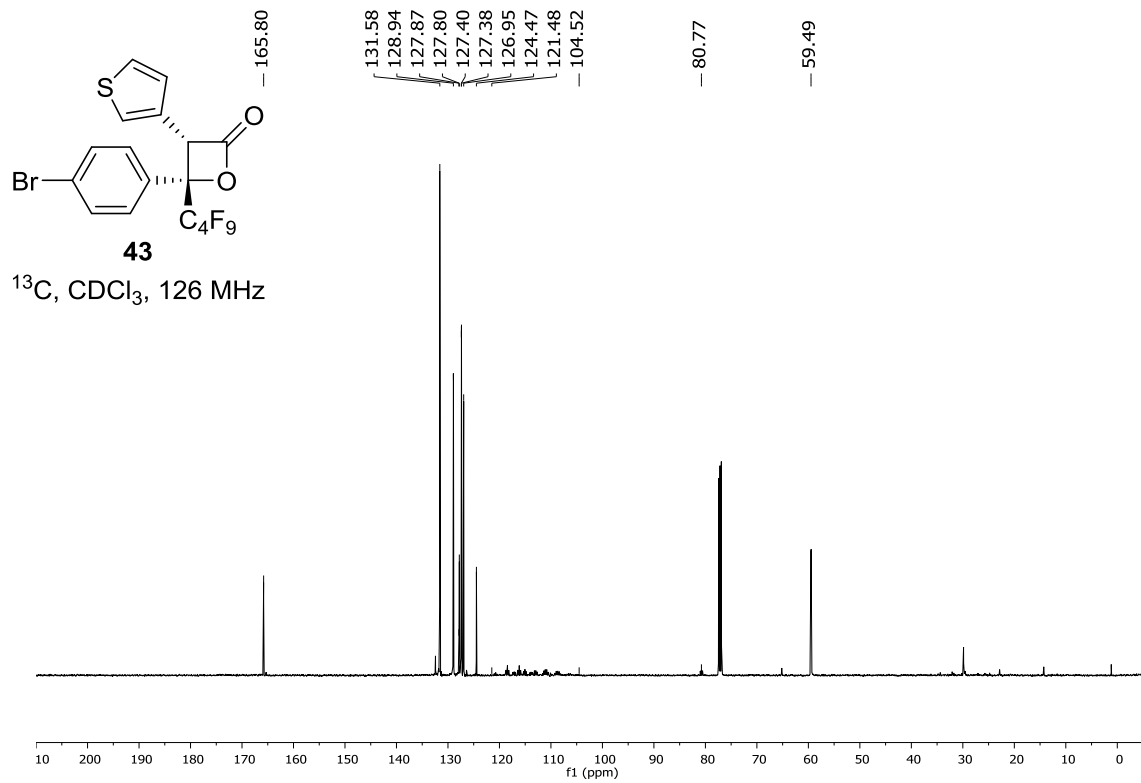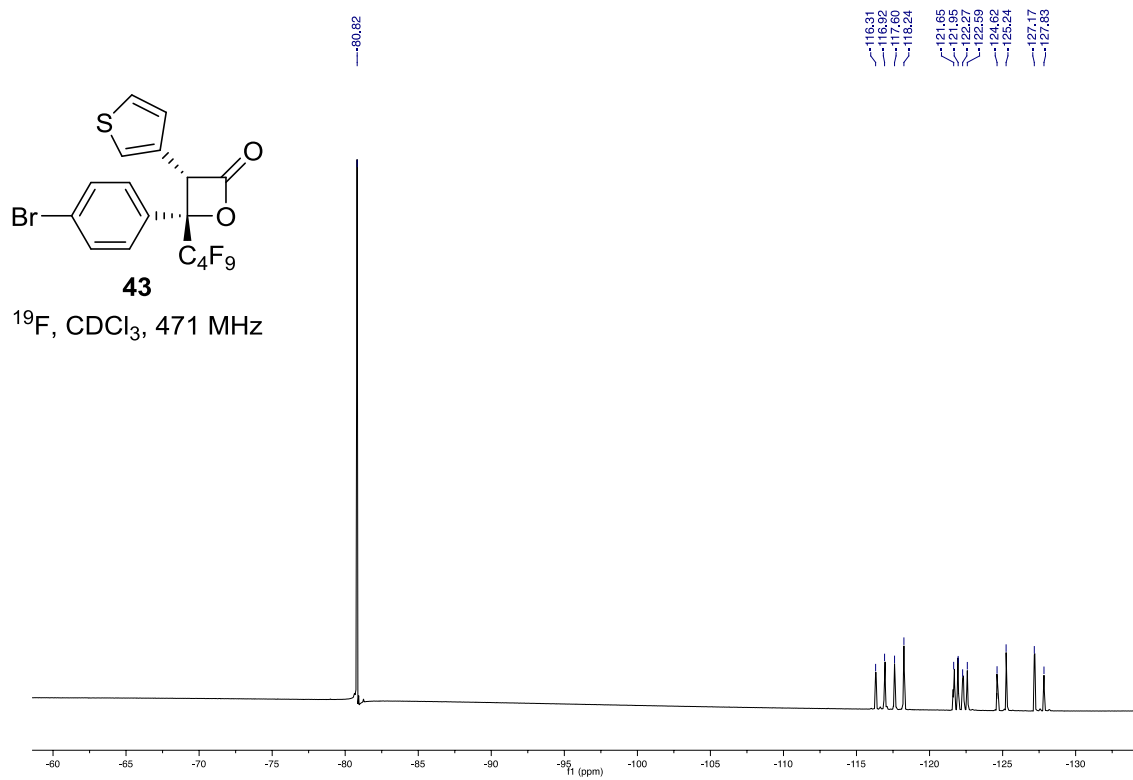

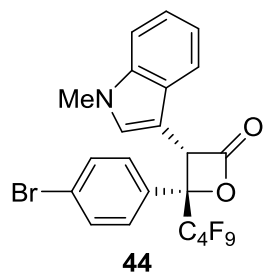

$^1\text{H}$ ,  $\text{CDCl}_3$ , 500 MHz

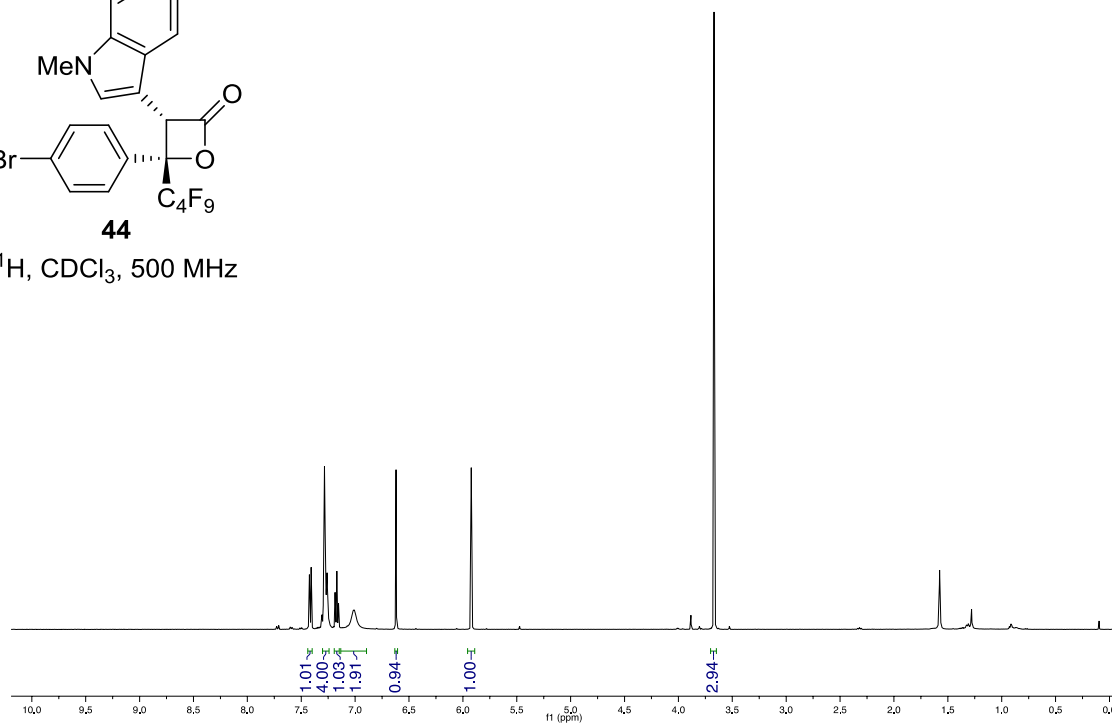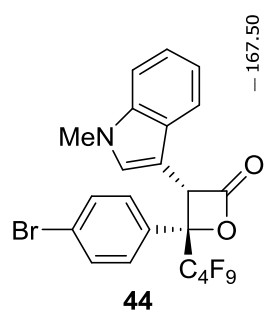

$^{13}\text{C}$ ,  $\text{CDCl}_3$ , 126 MHz

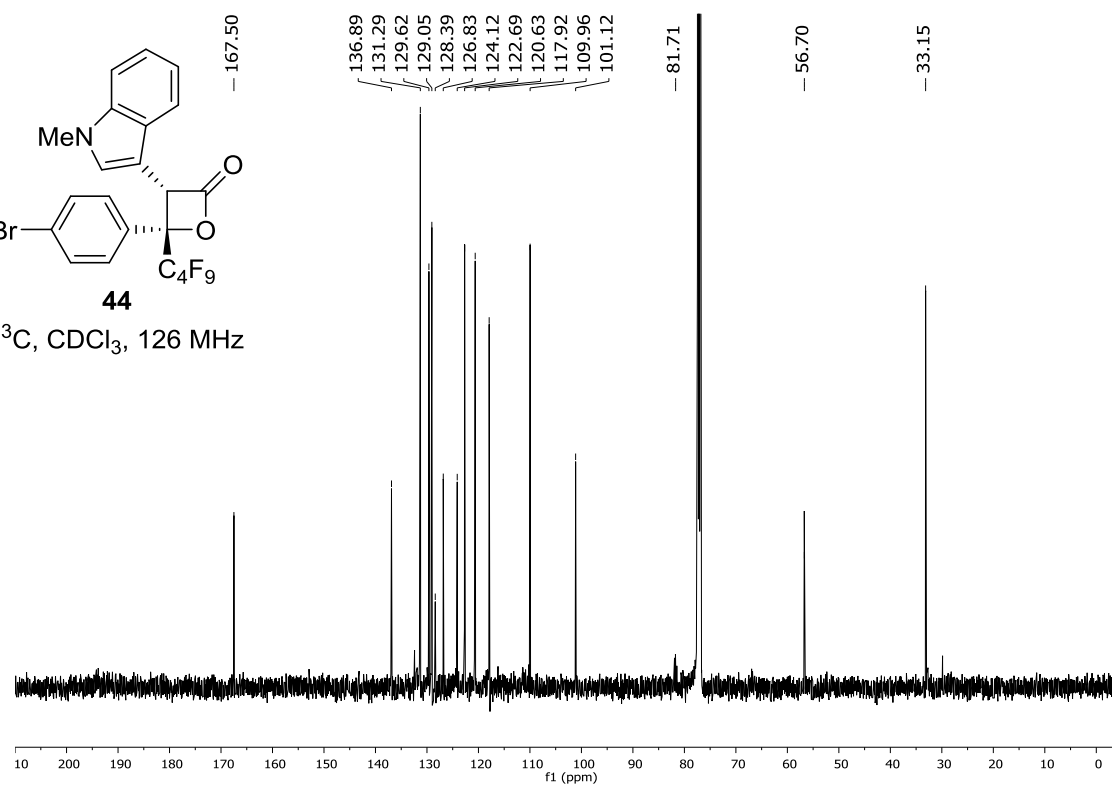

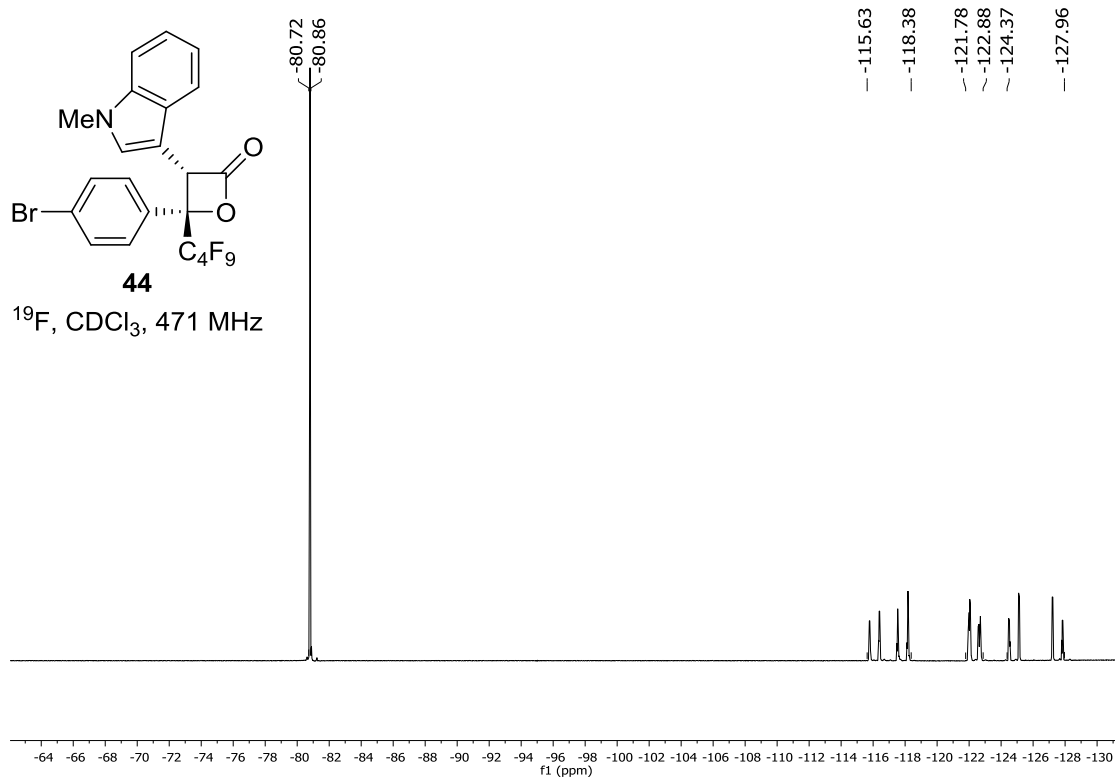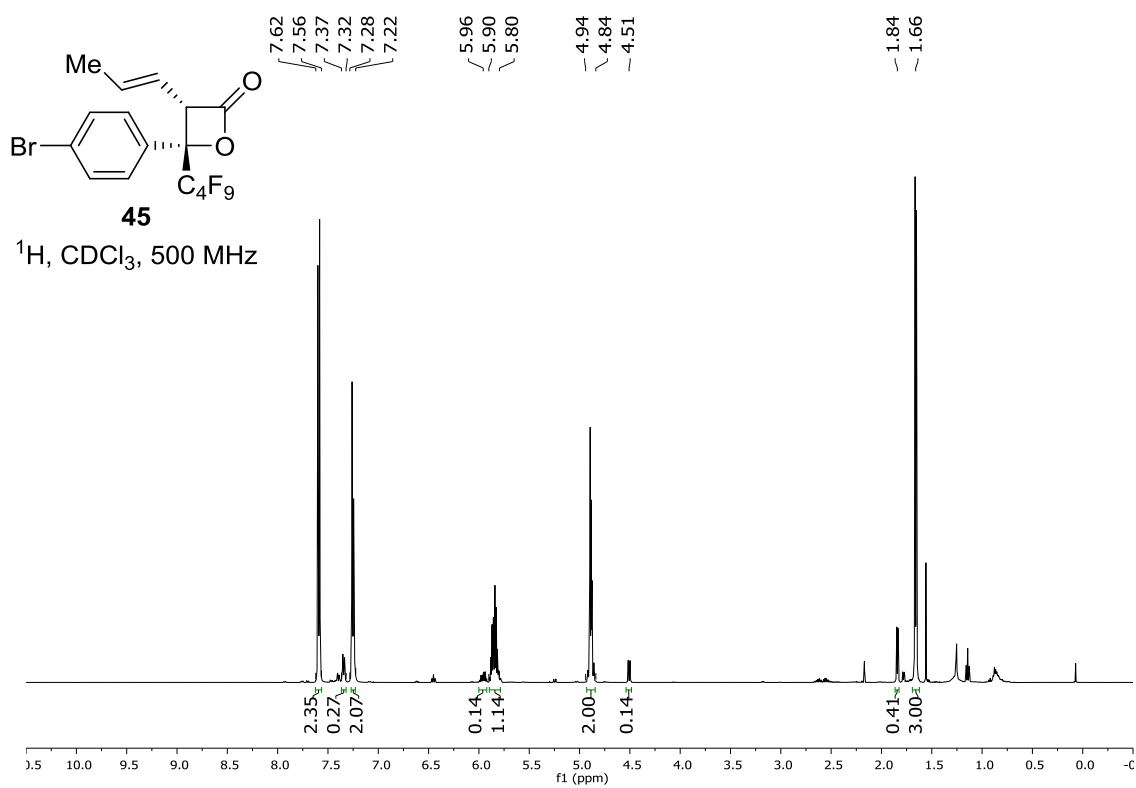

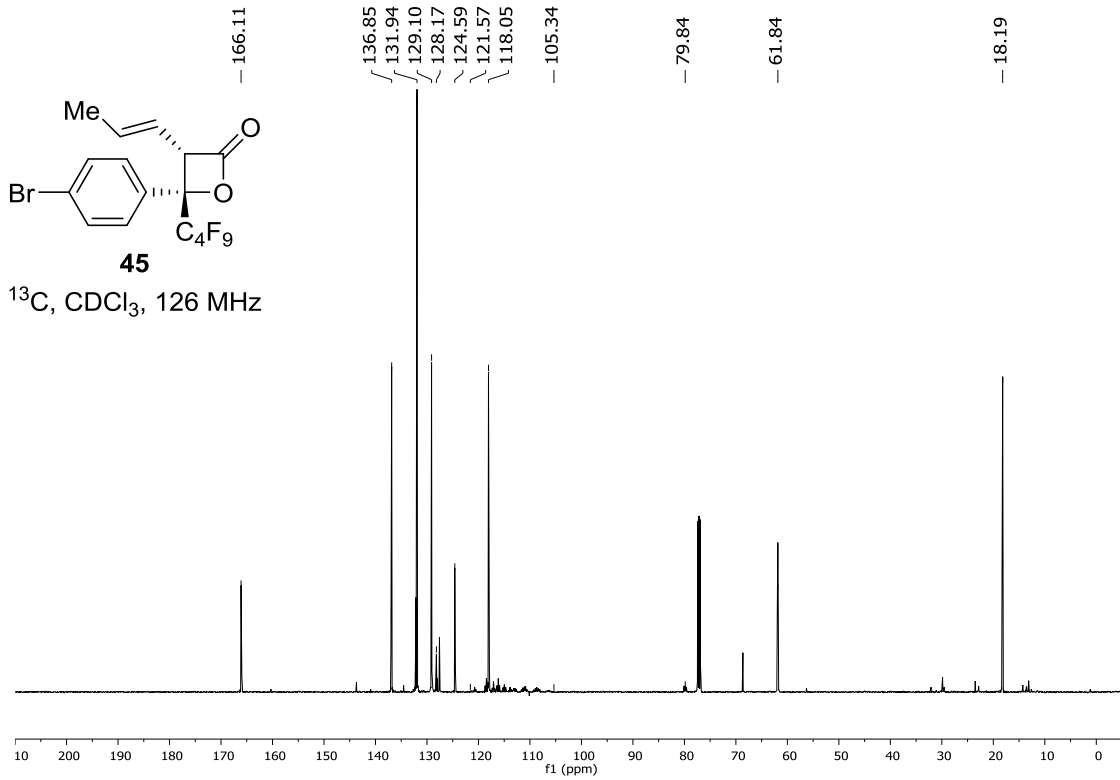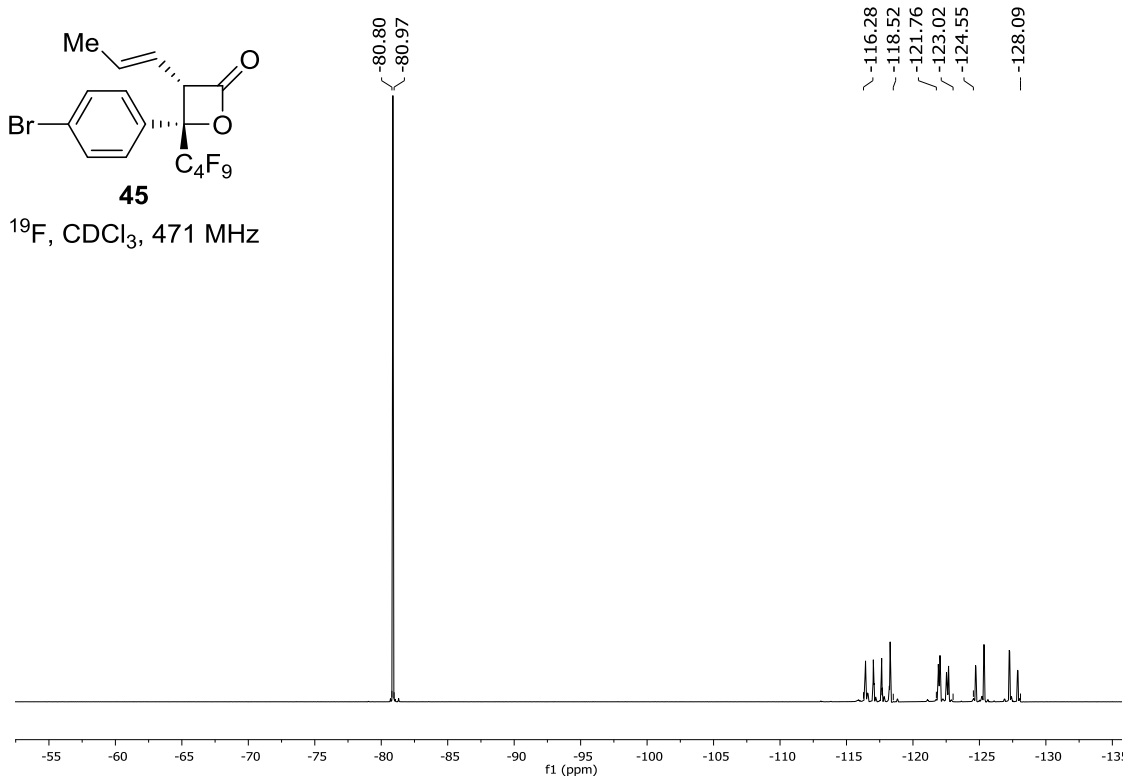

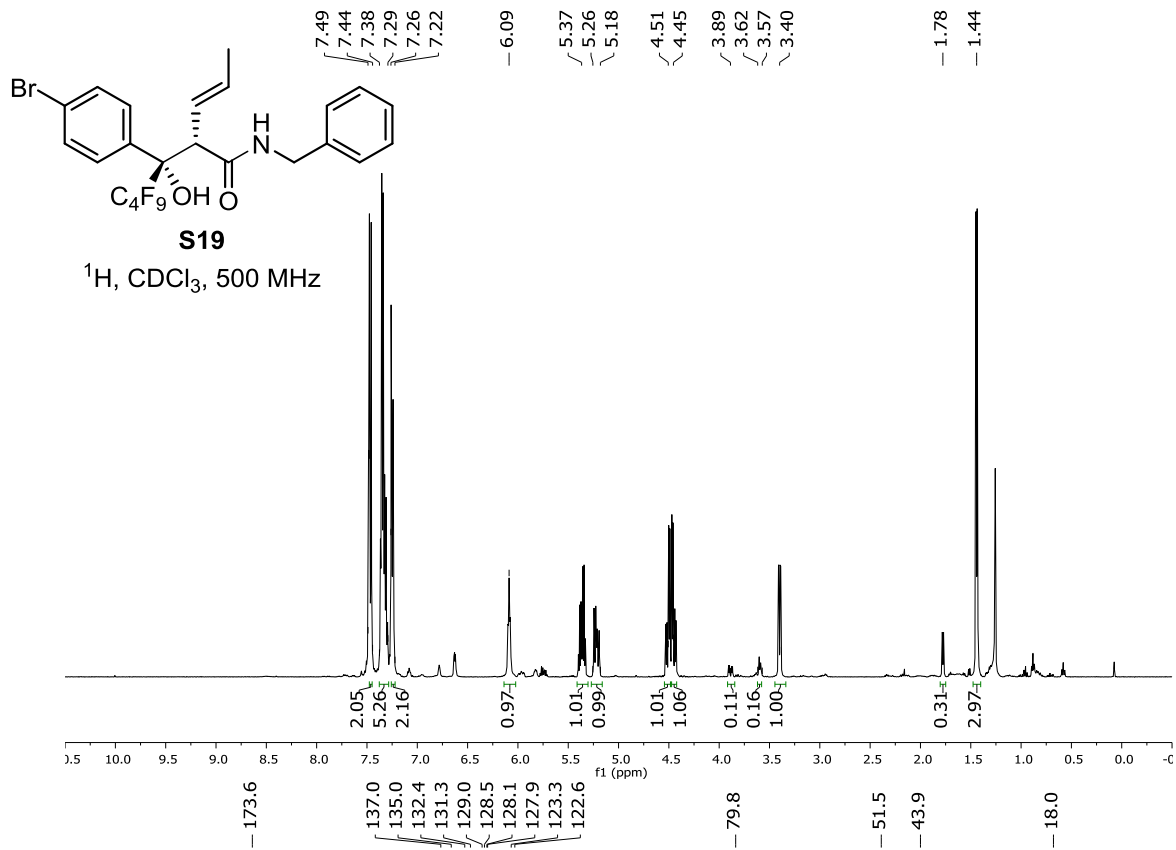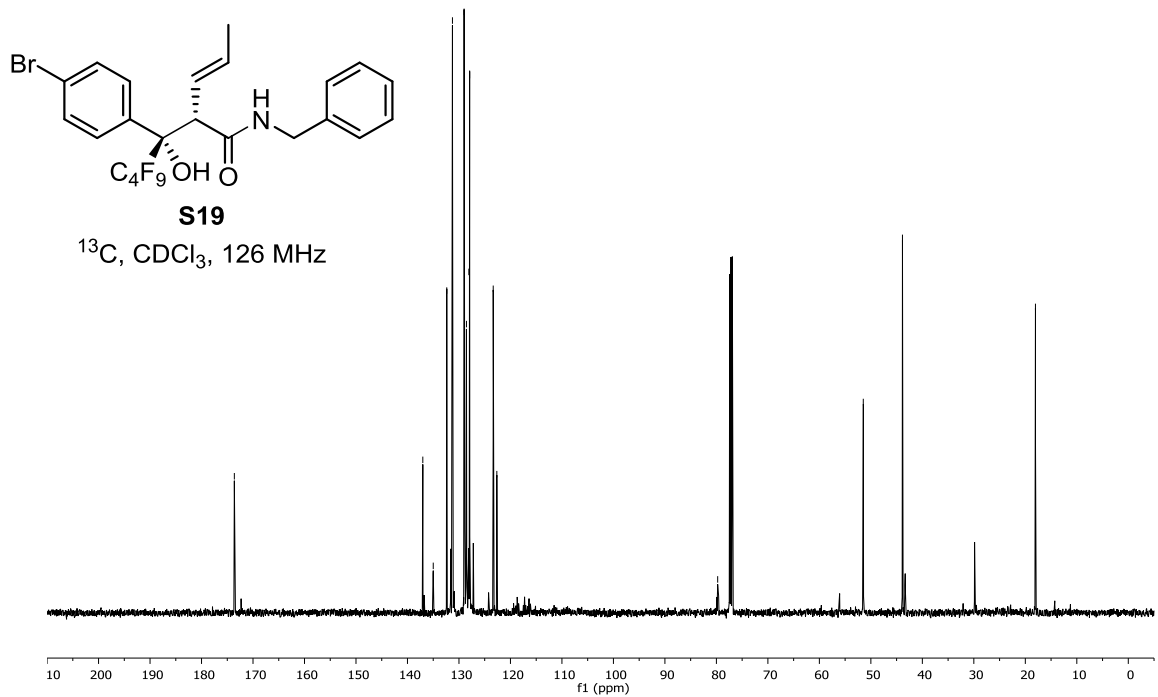

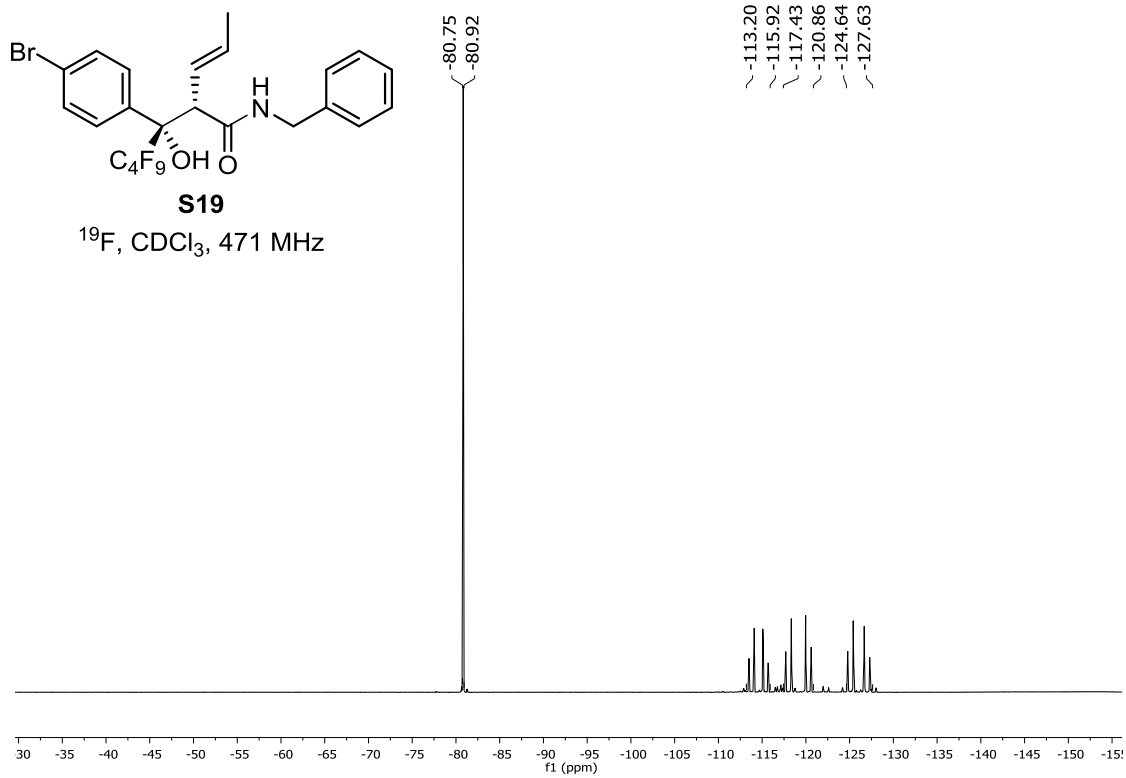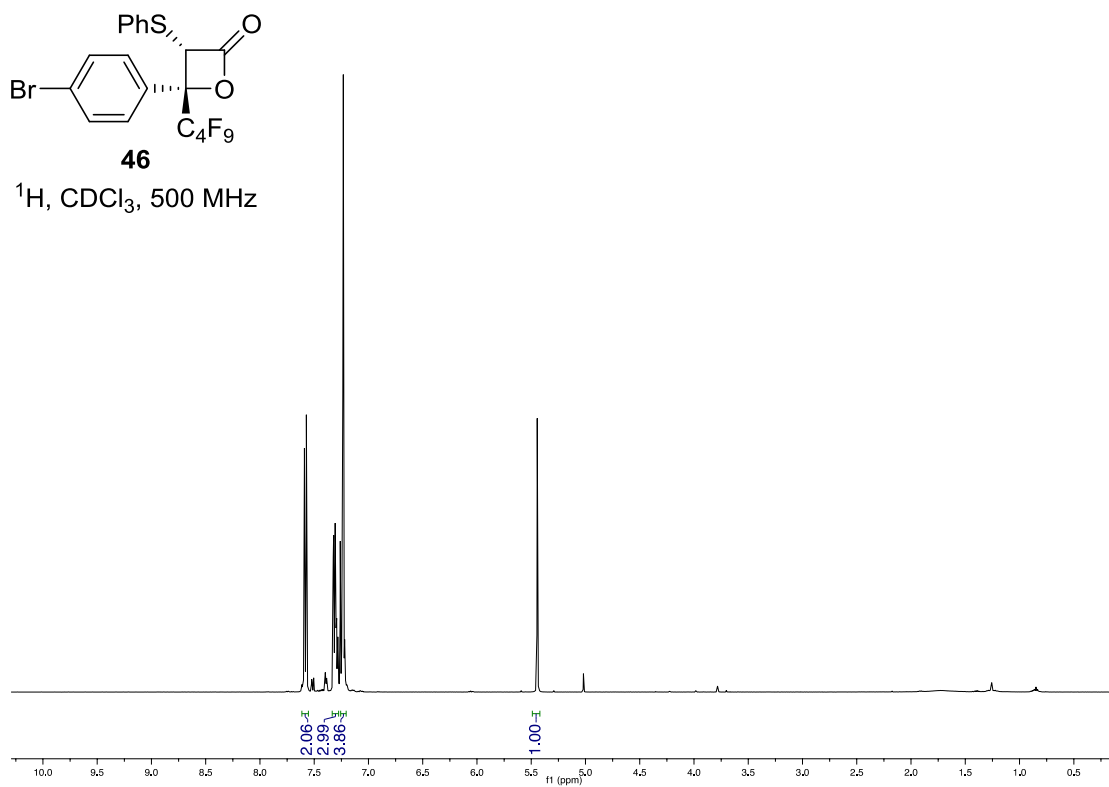

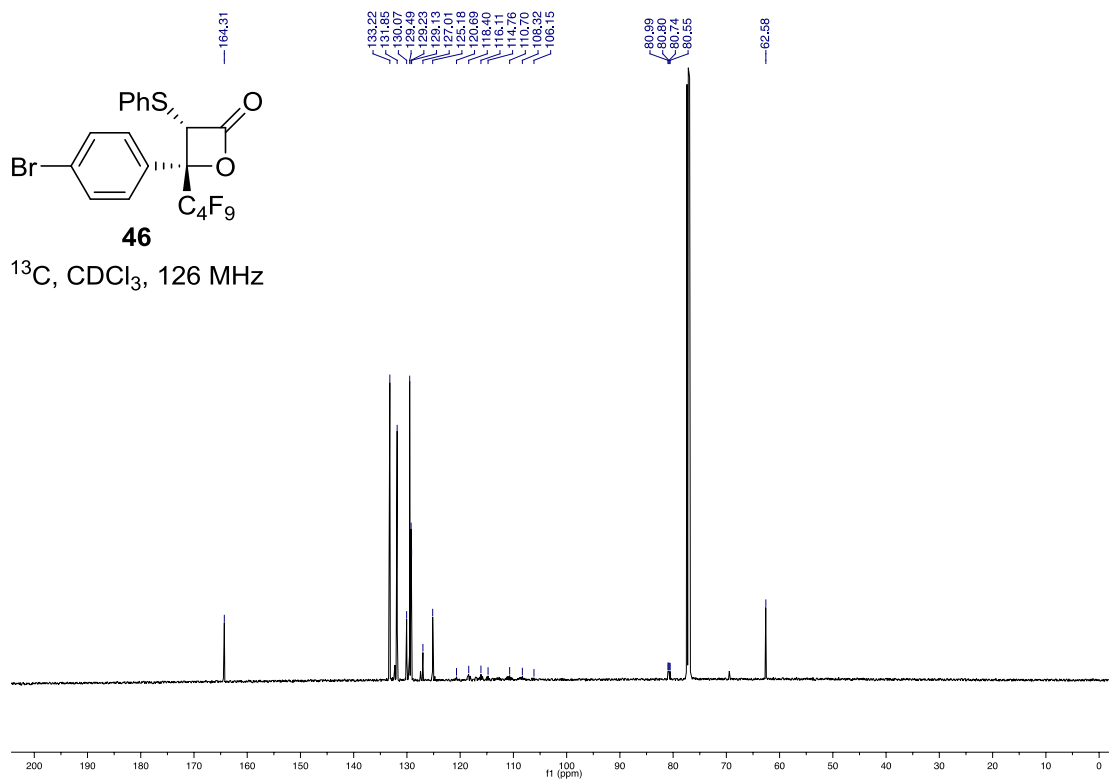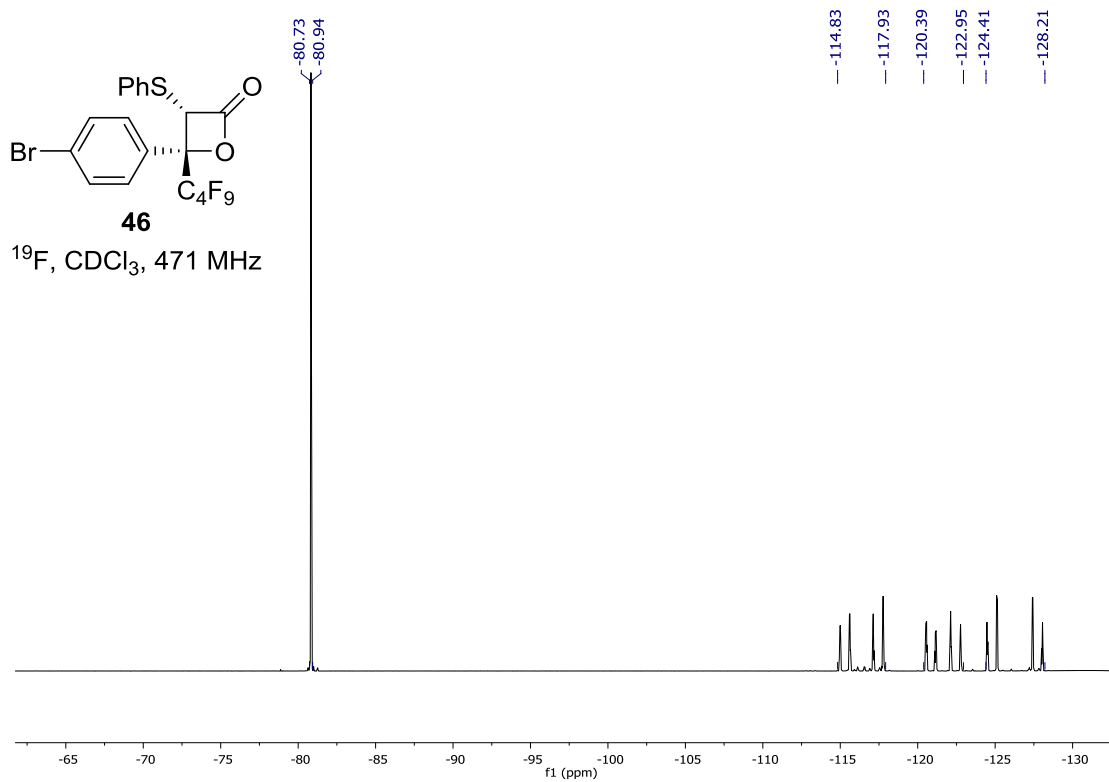

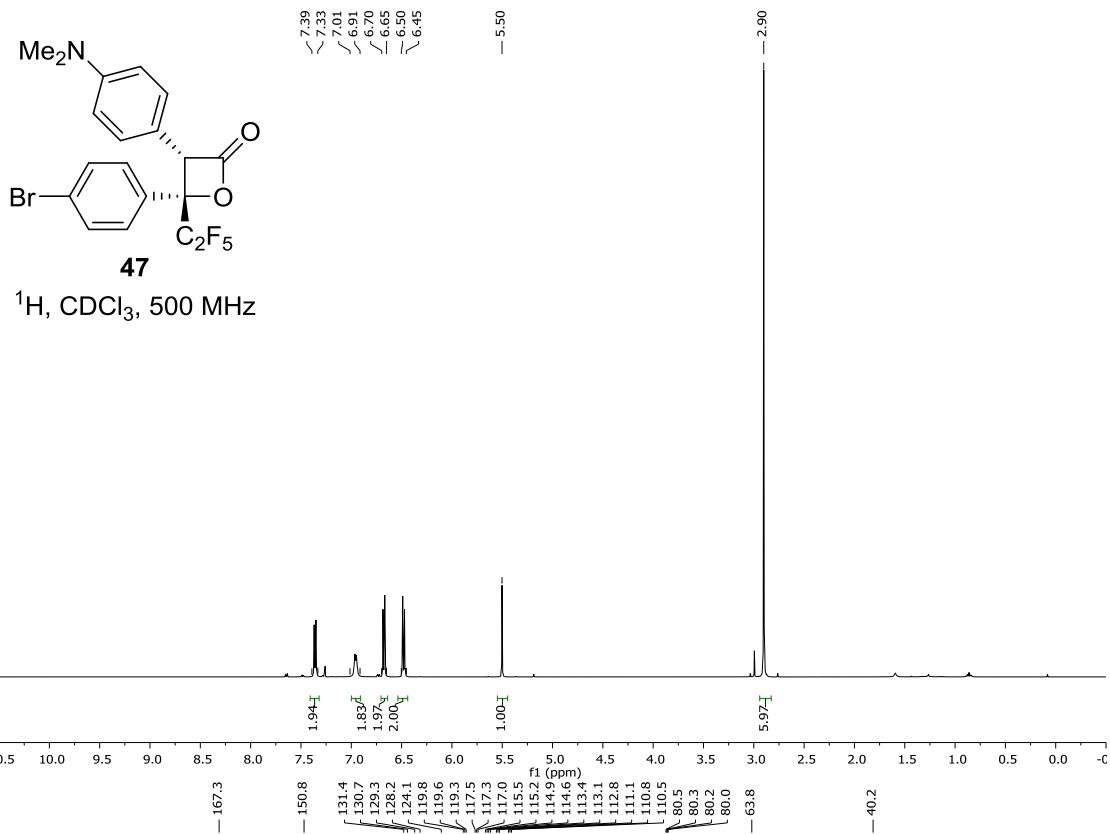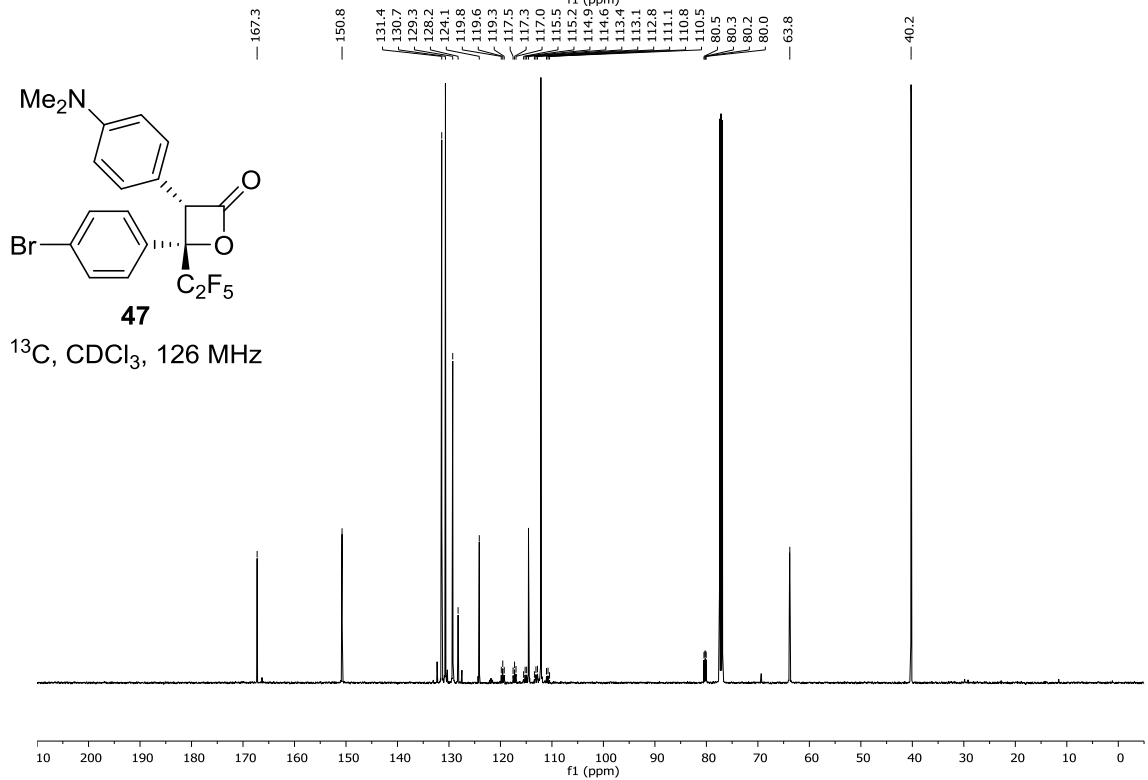





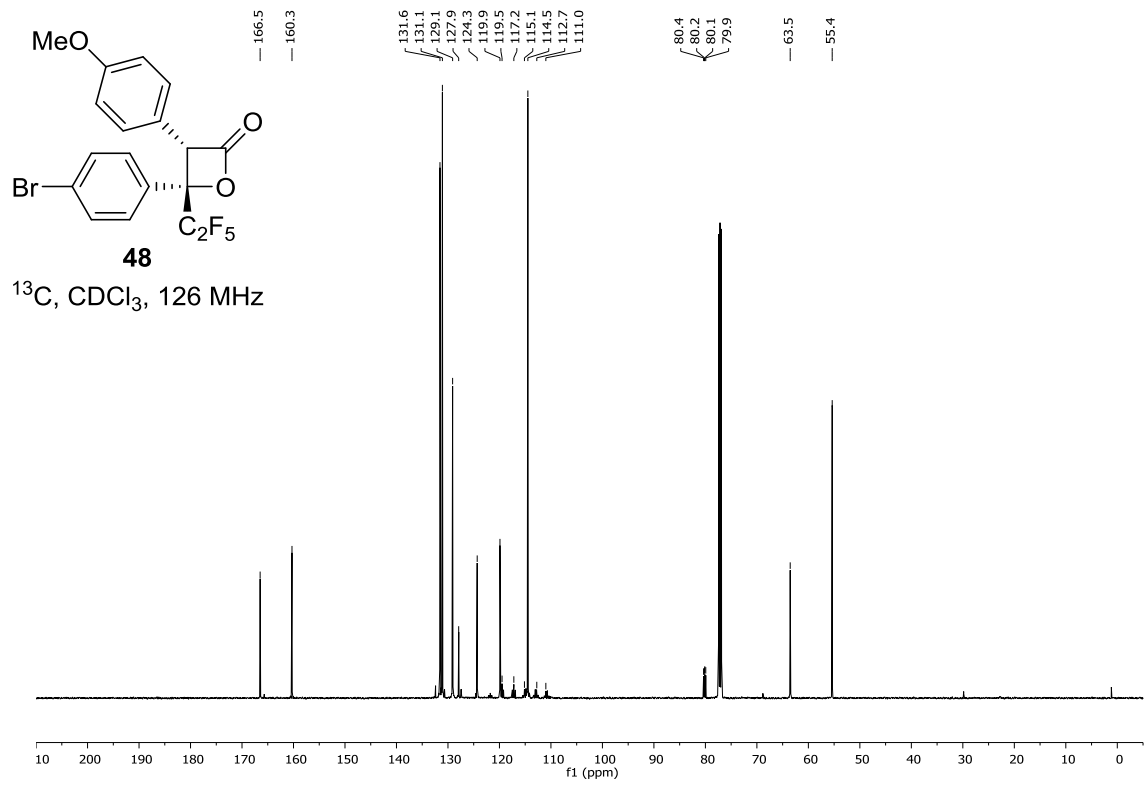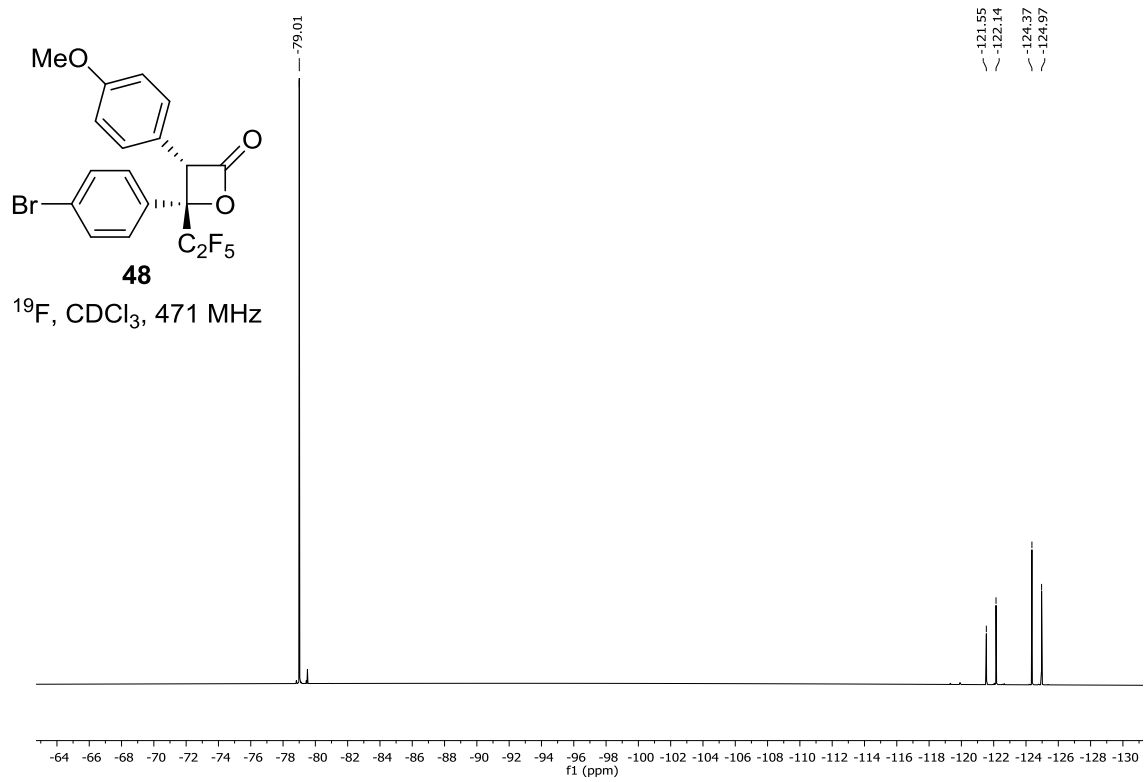

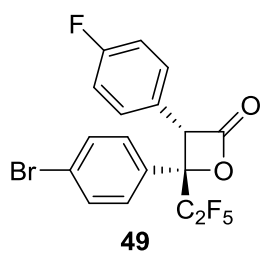

$^1\text{H}$ ,  $\text{CDCl}_3$ , 500 MHz

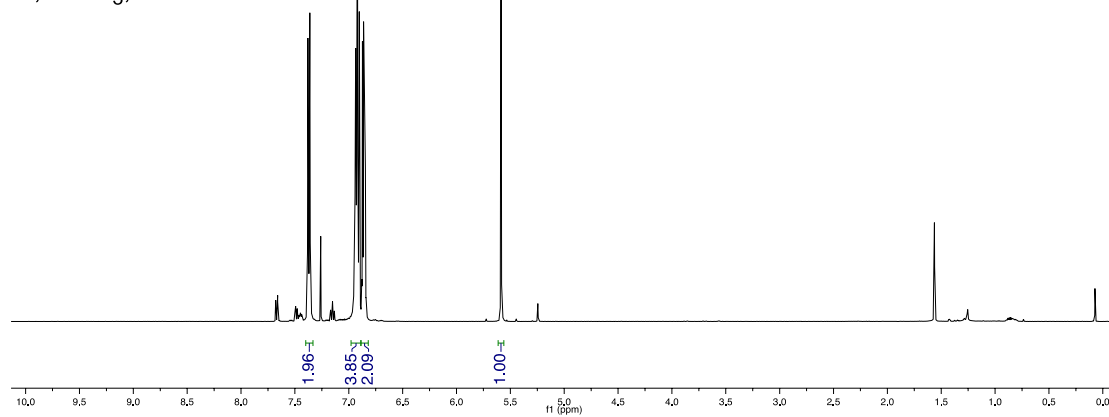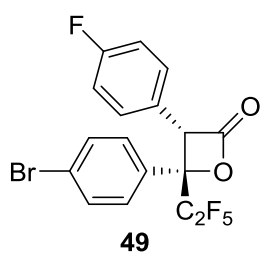

$^{13}\text{C}$ ,  $\text{CDCl}_3$ , 126 MHz

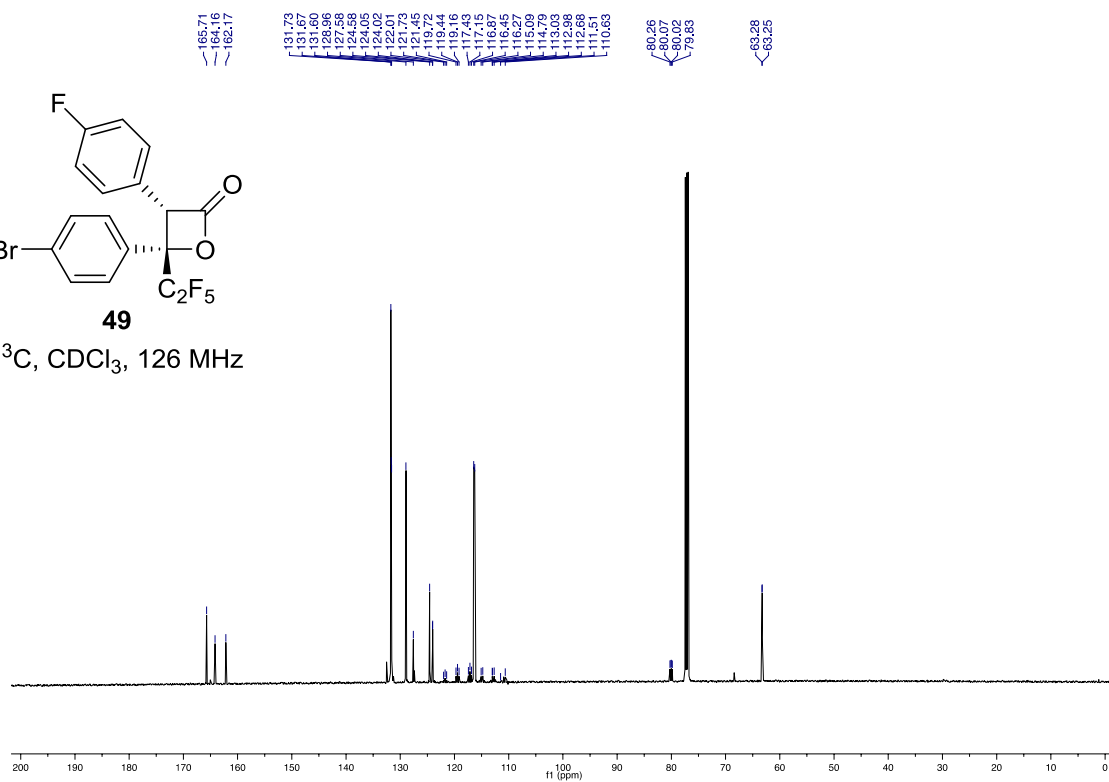

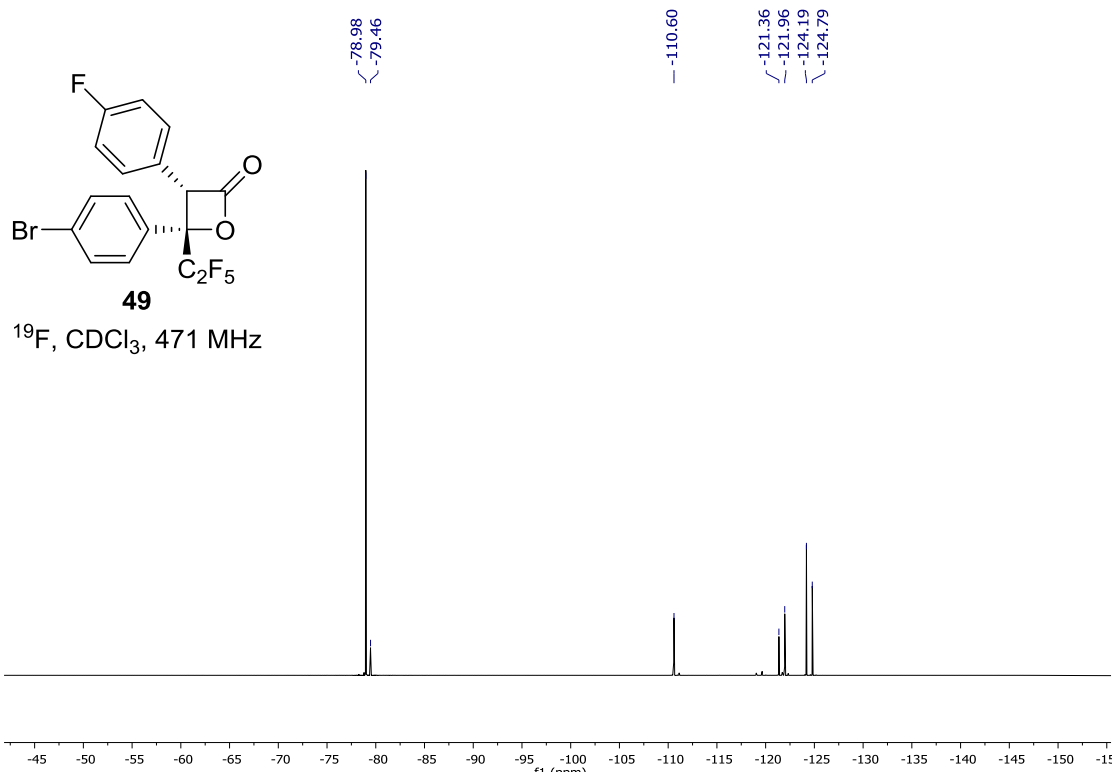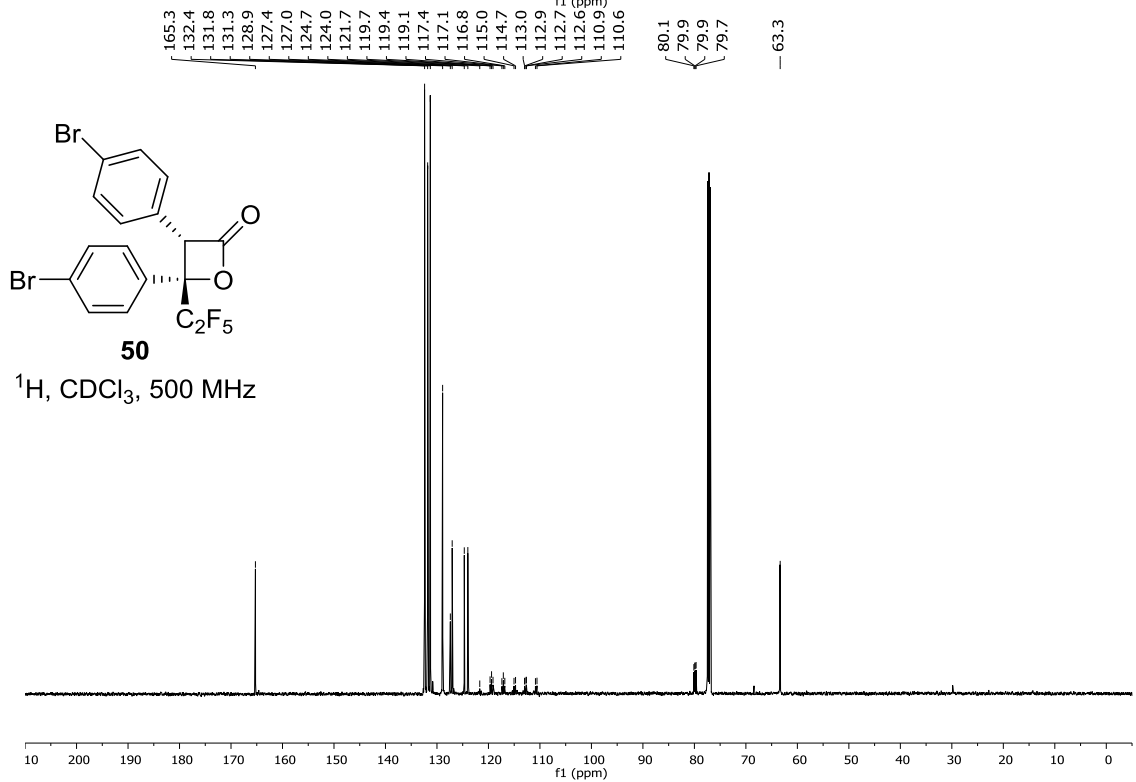

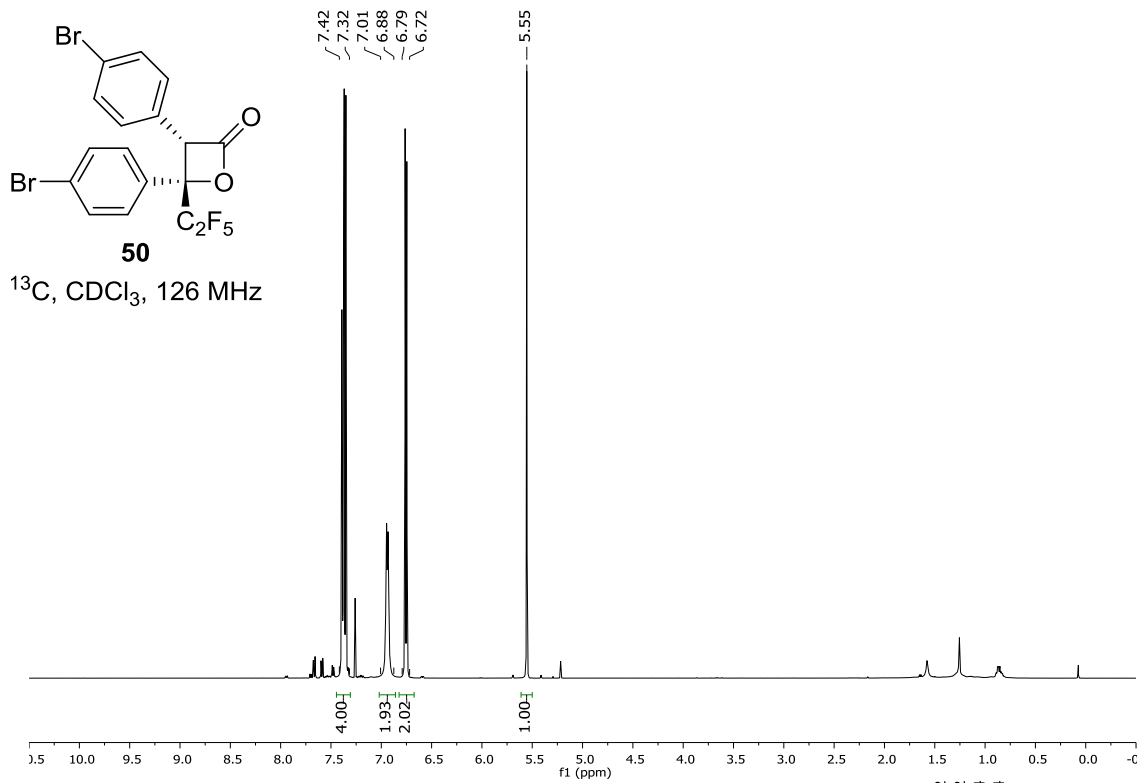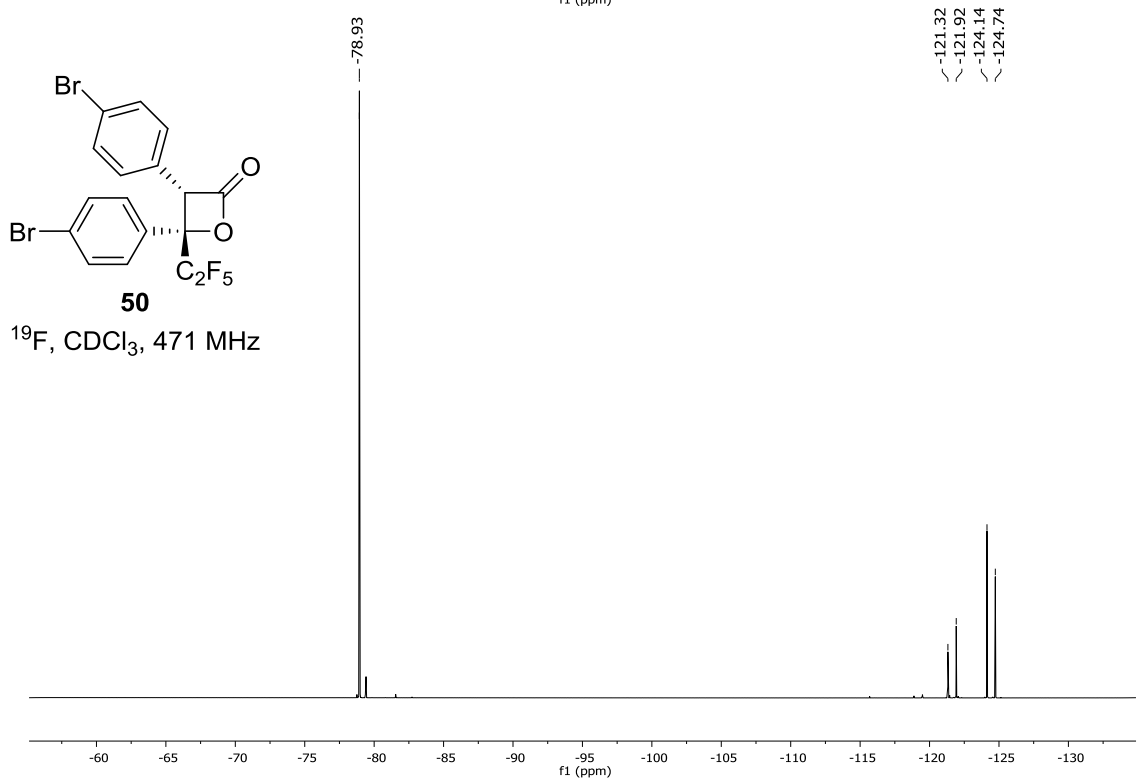

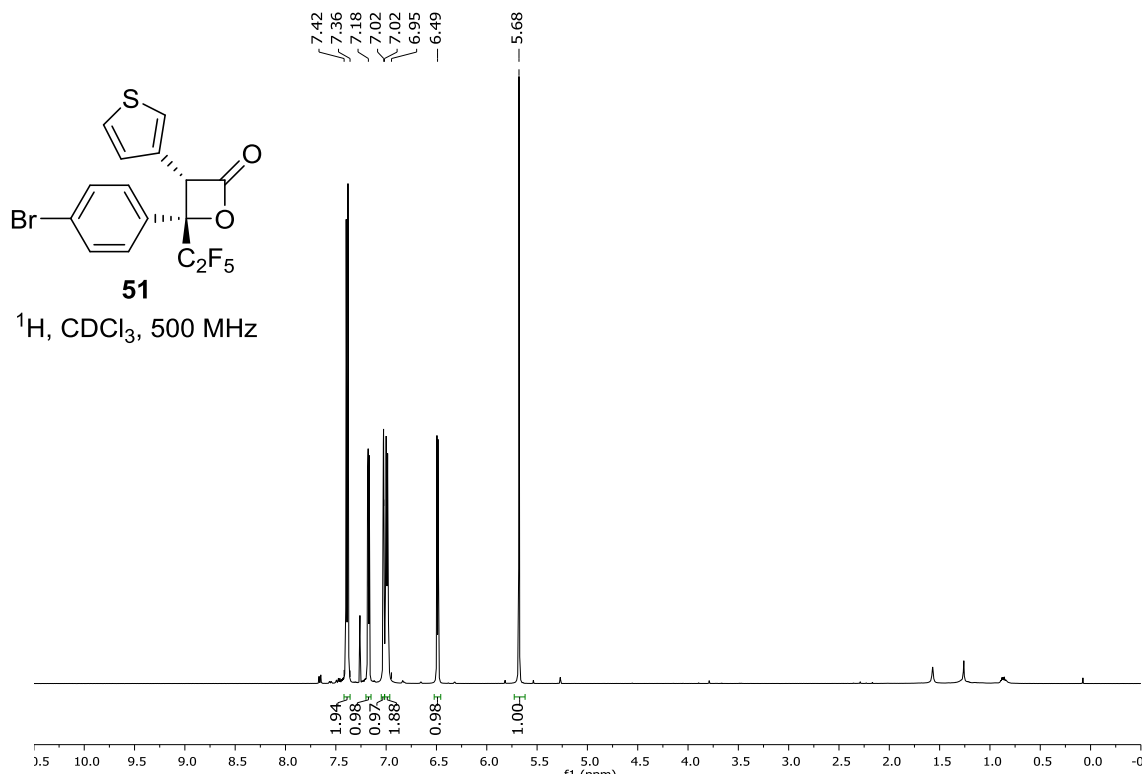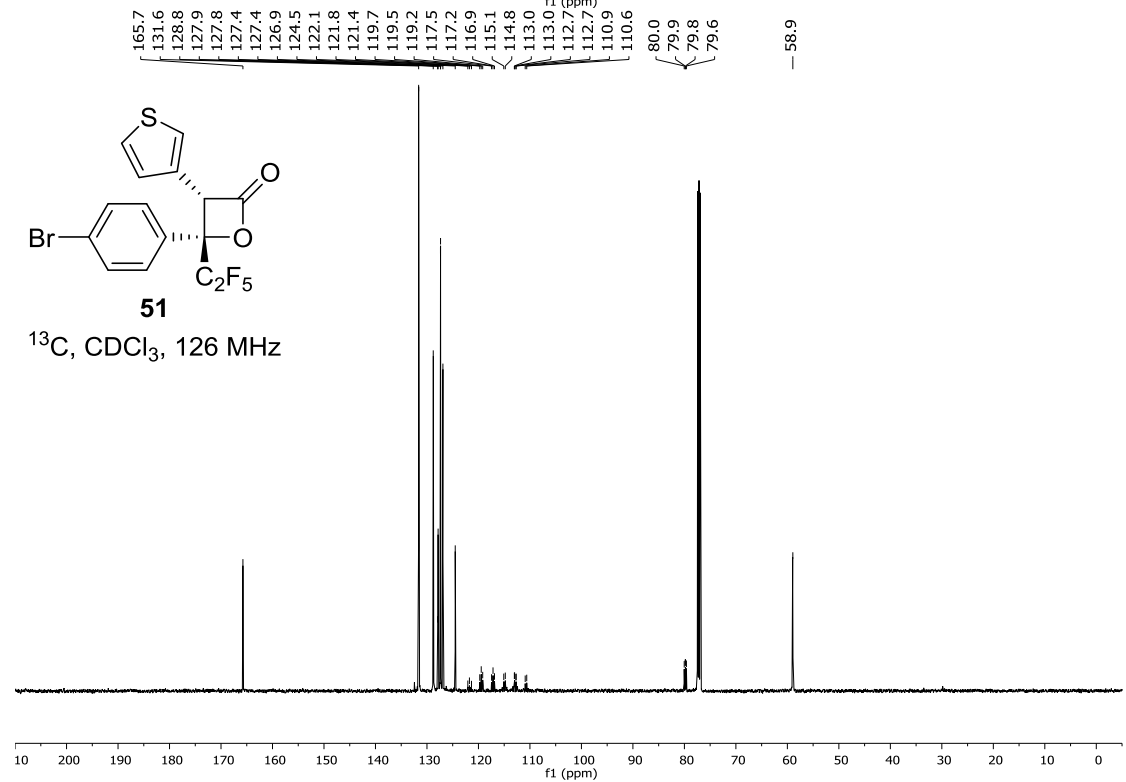

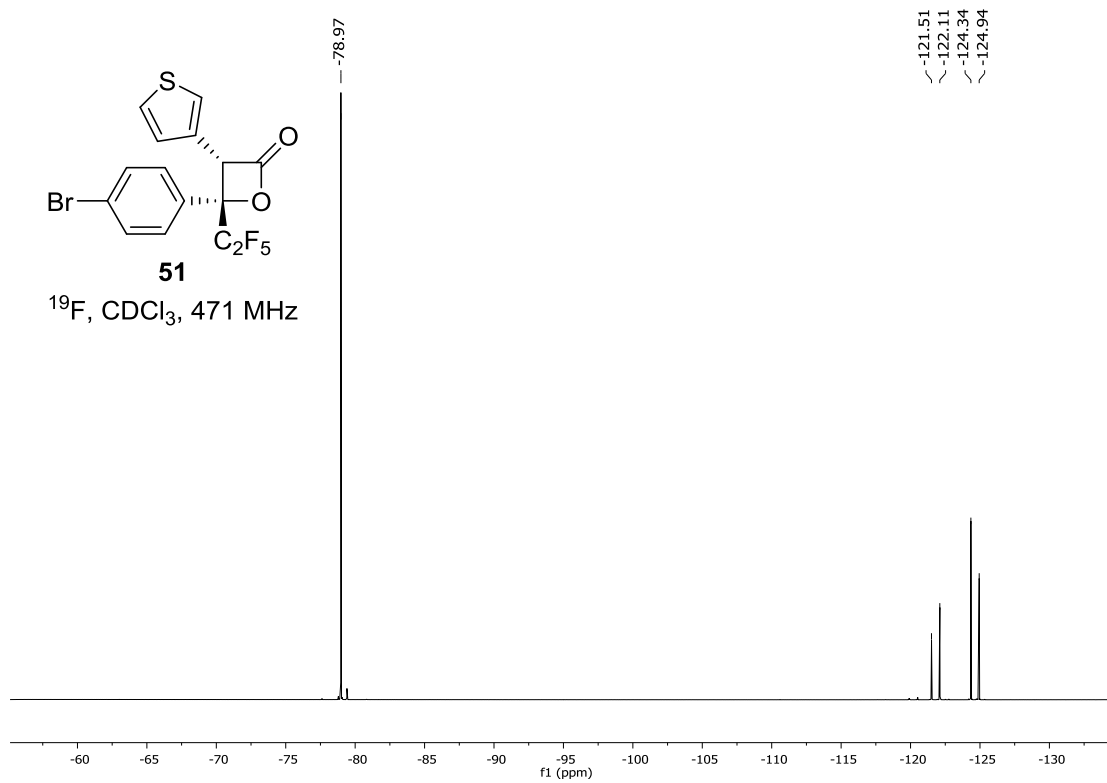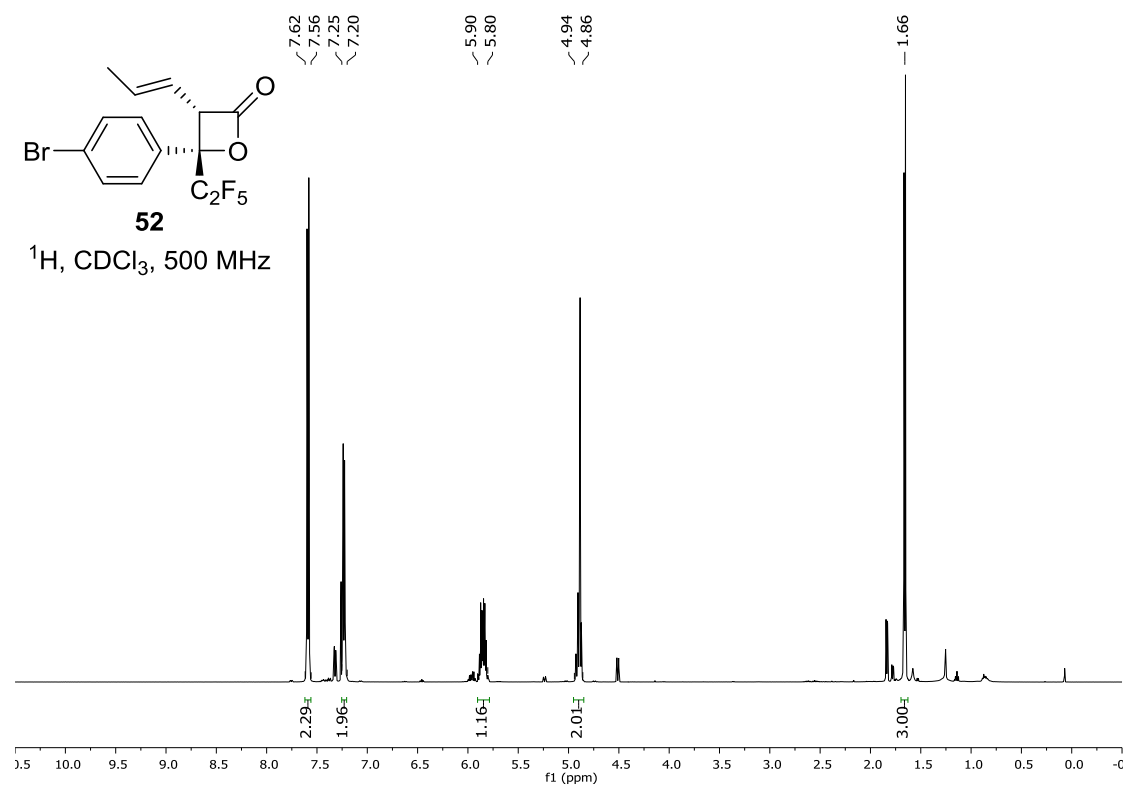

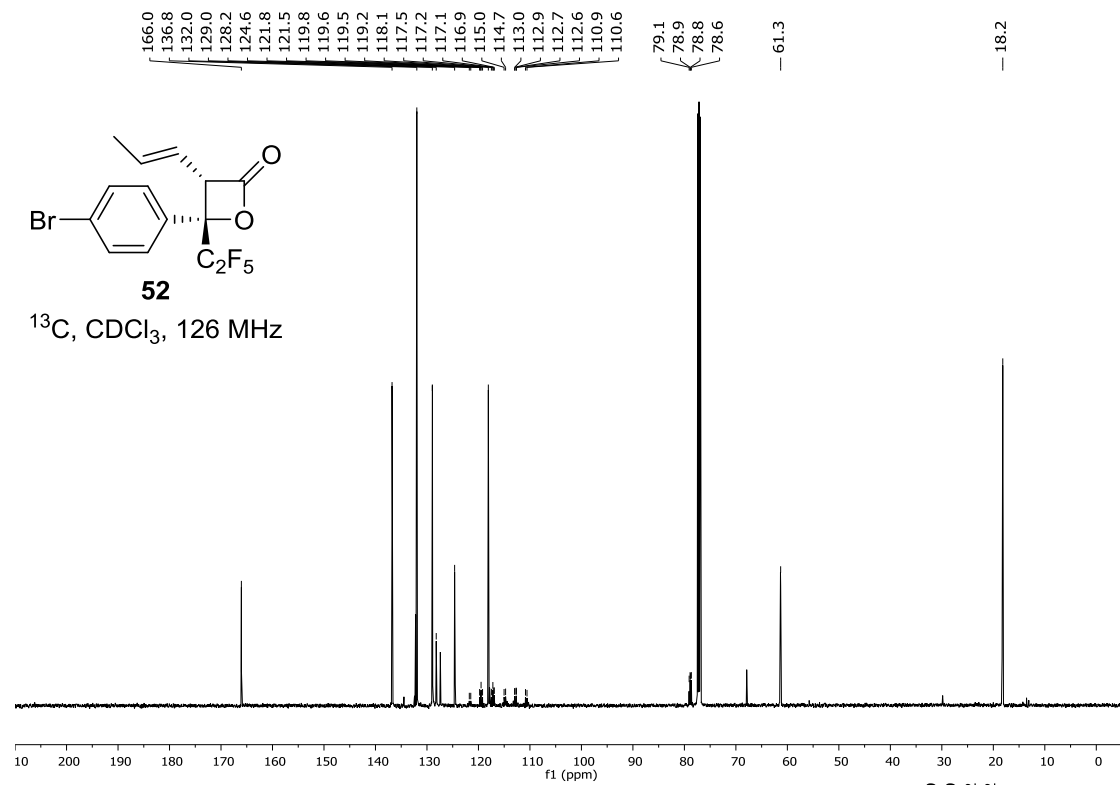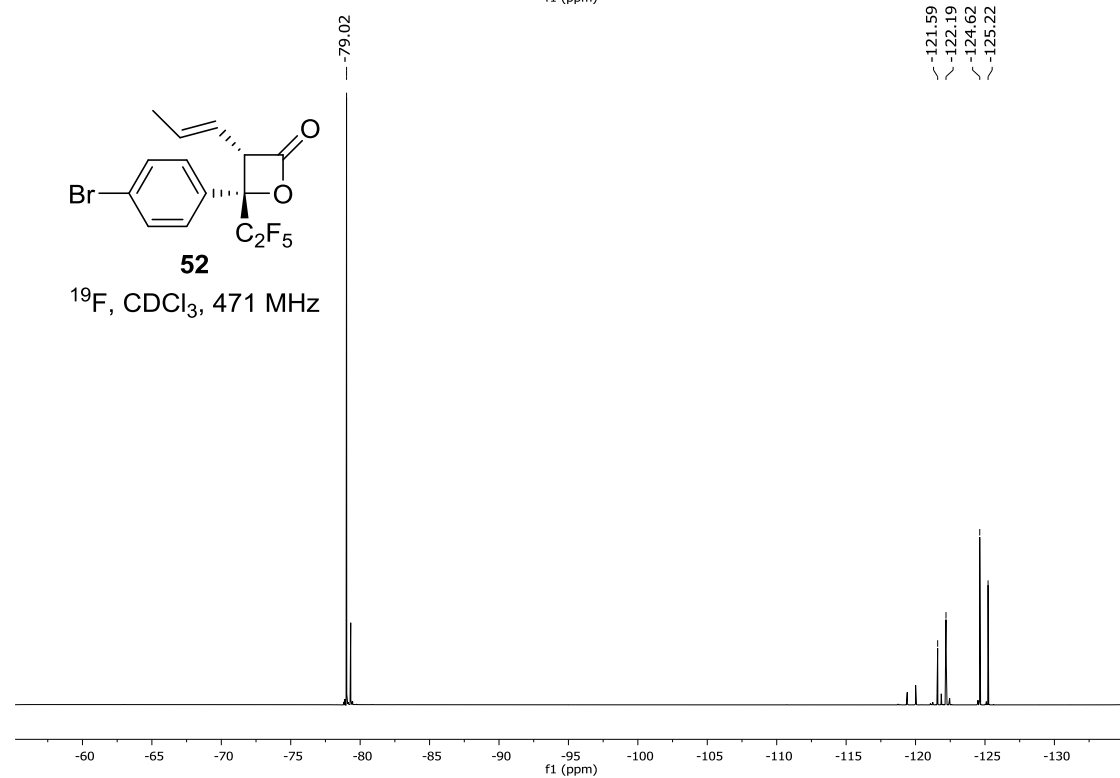



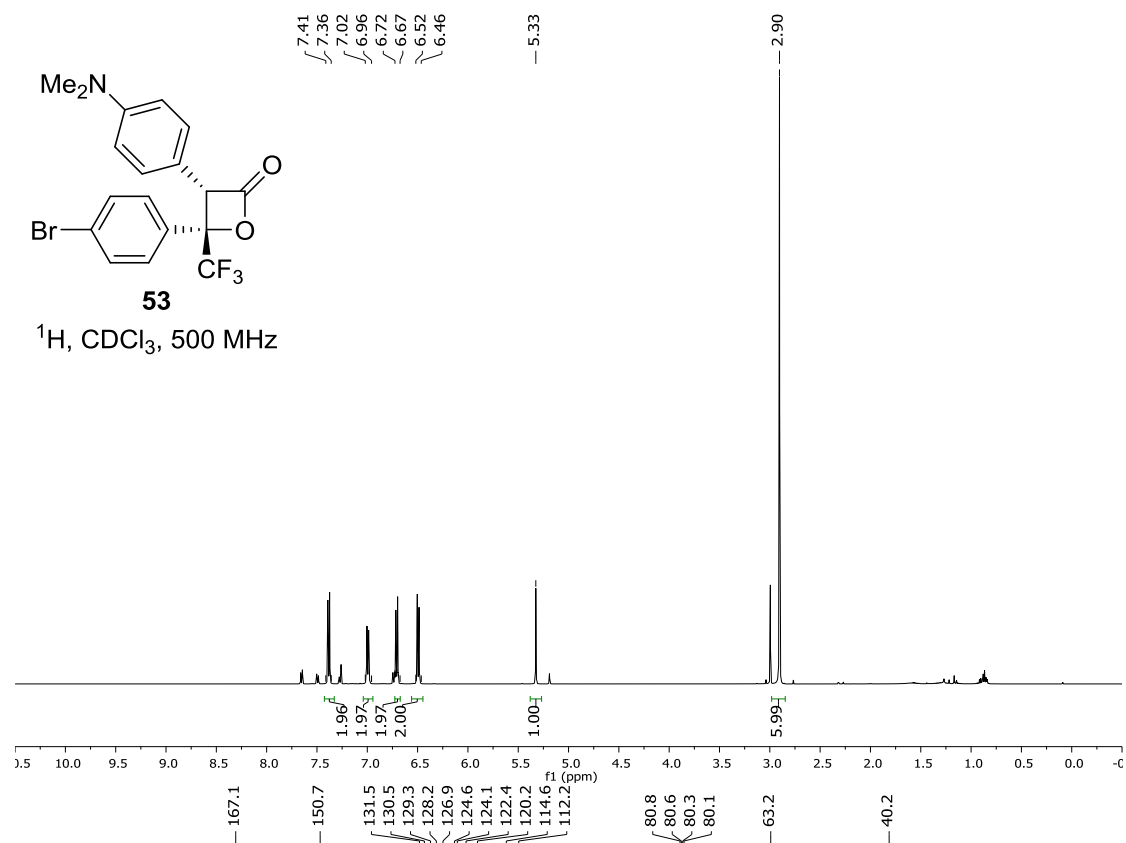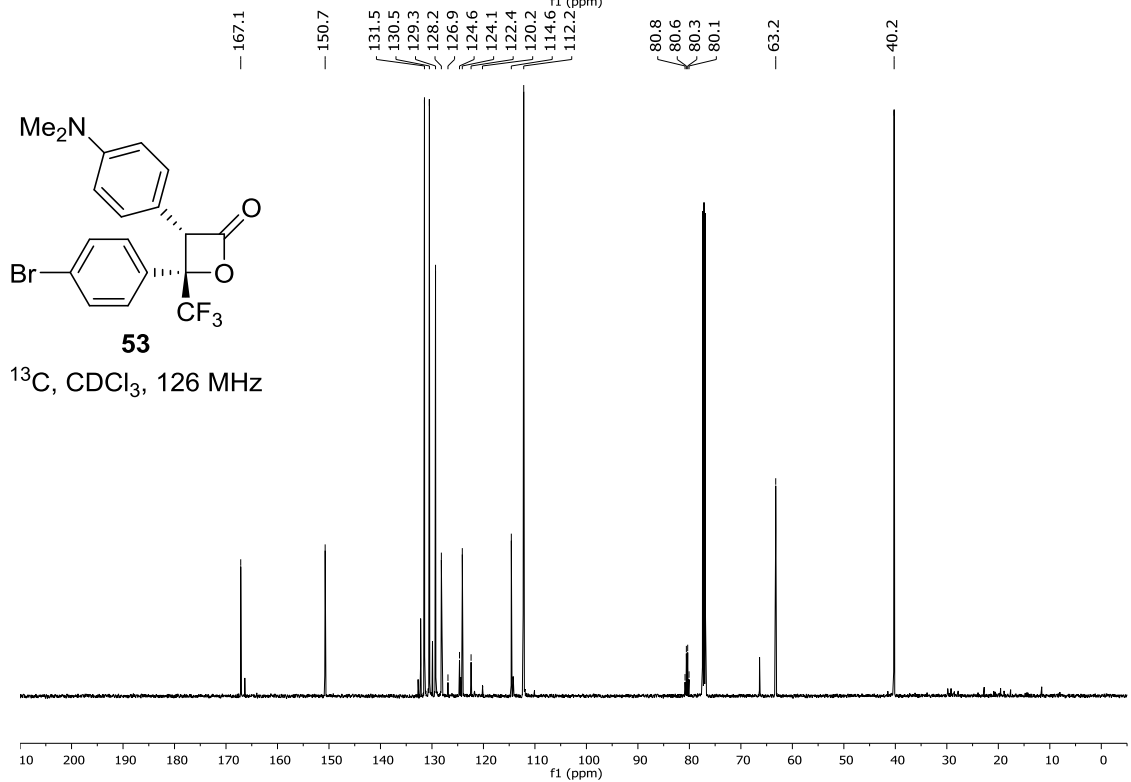

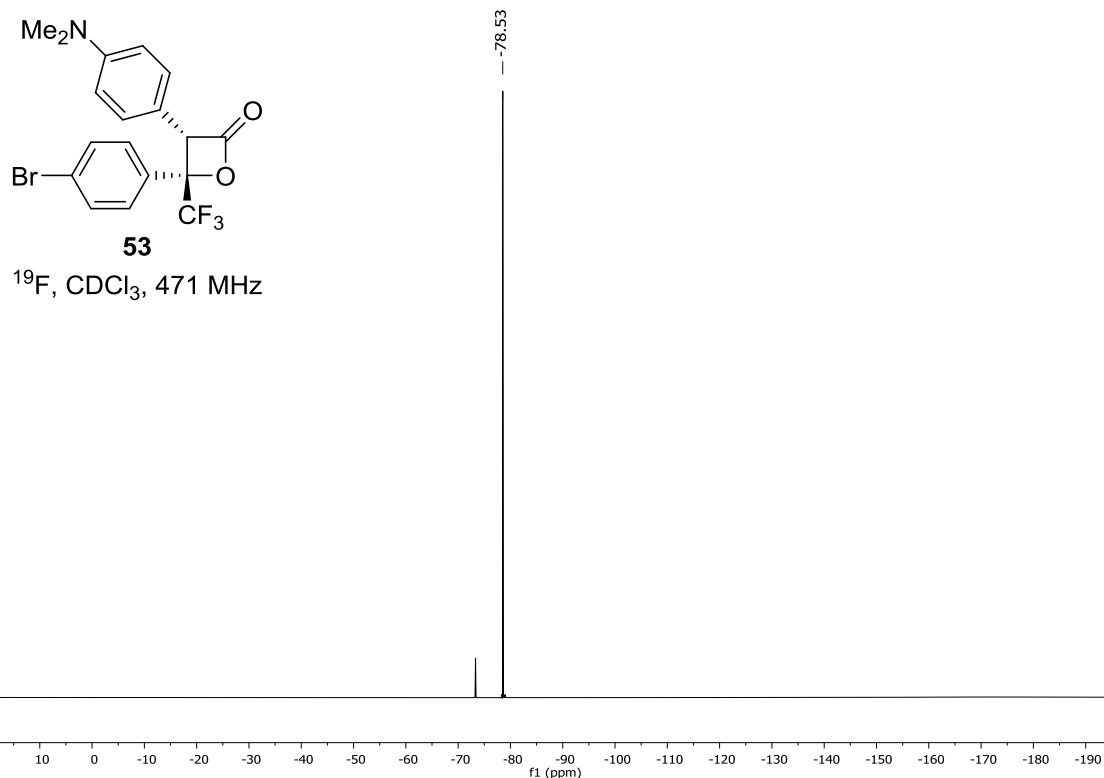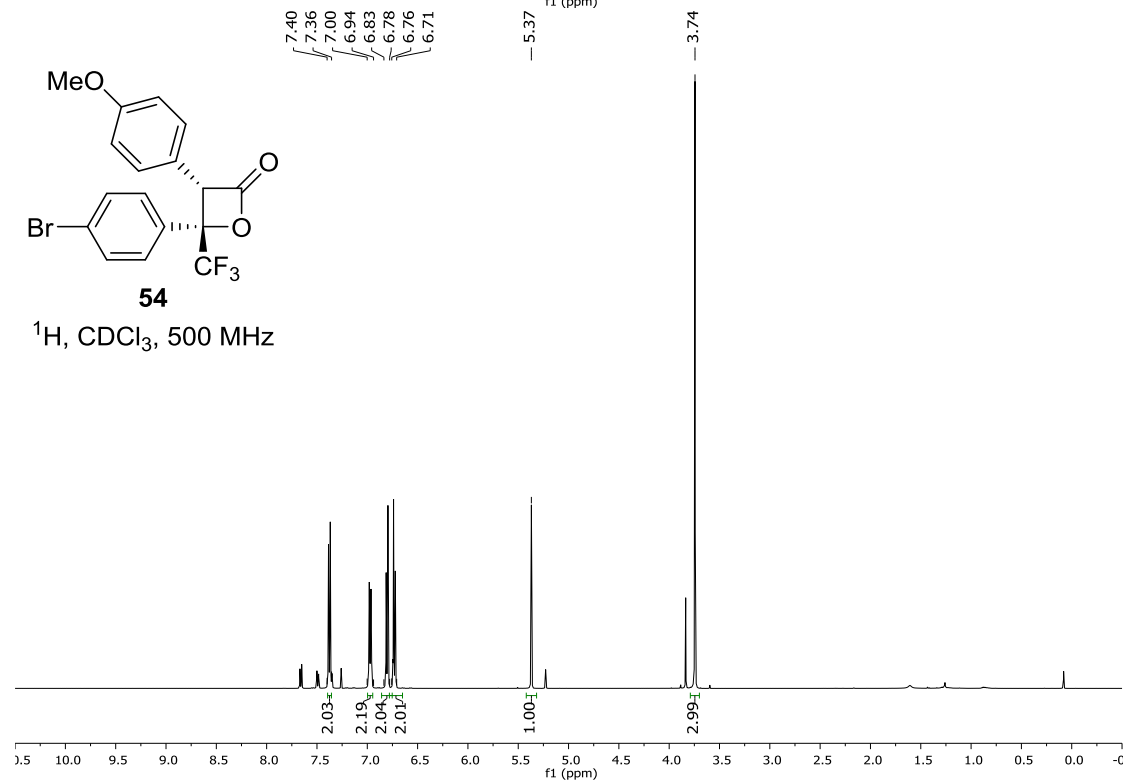

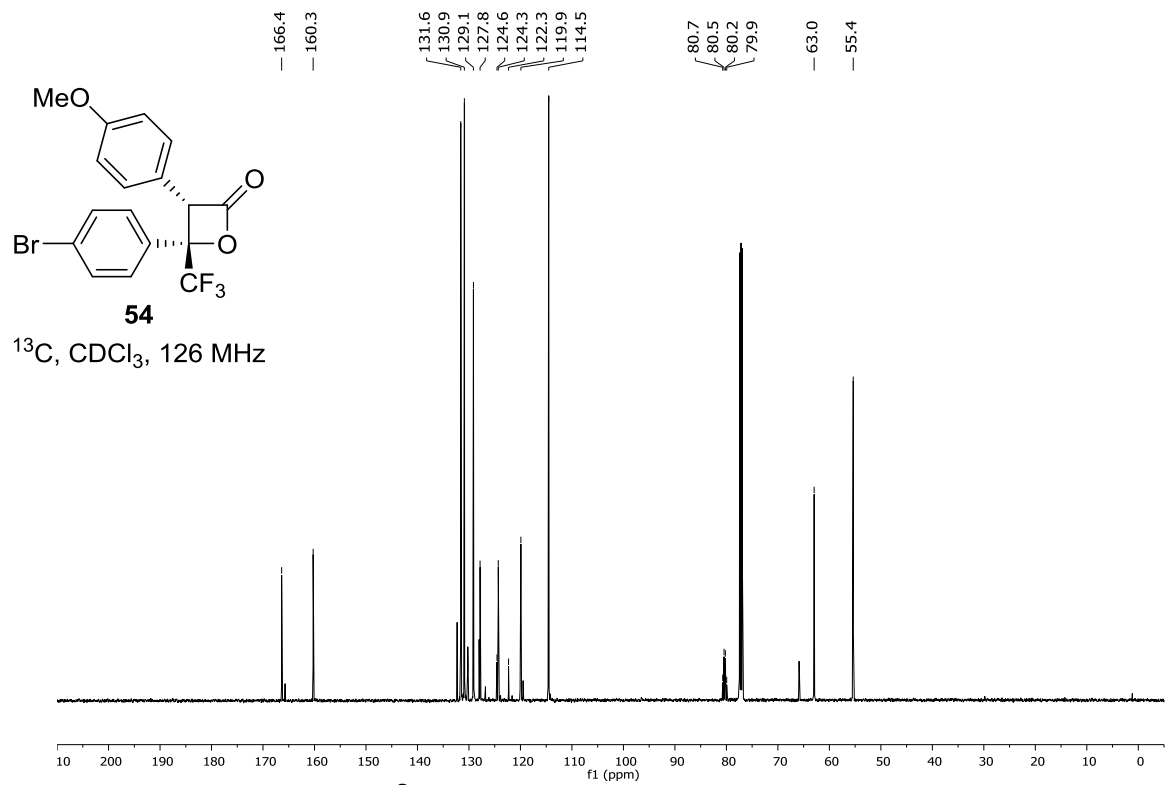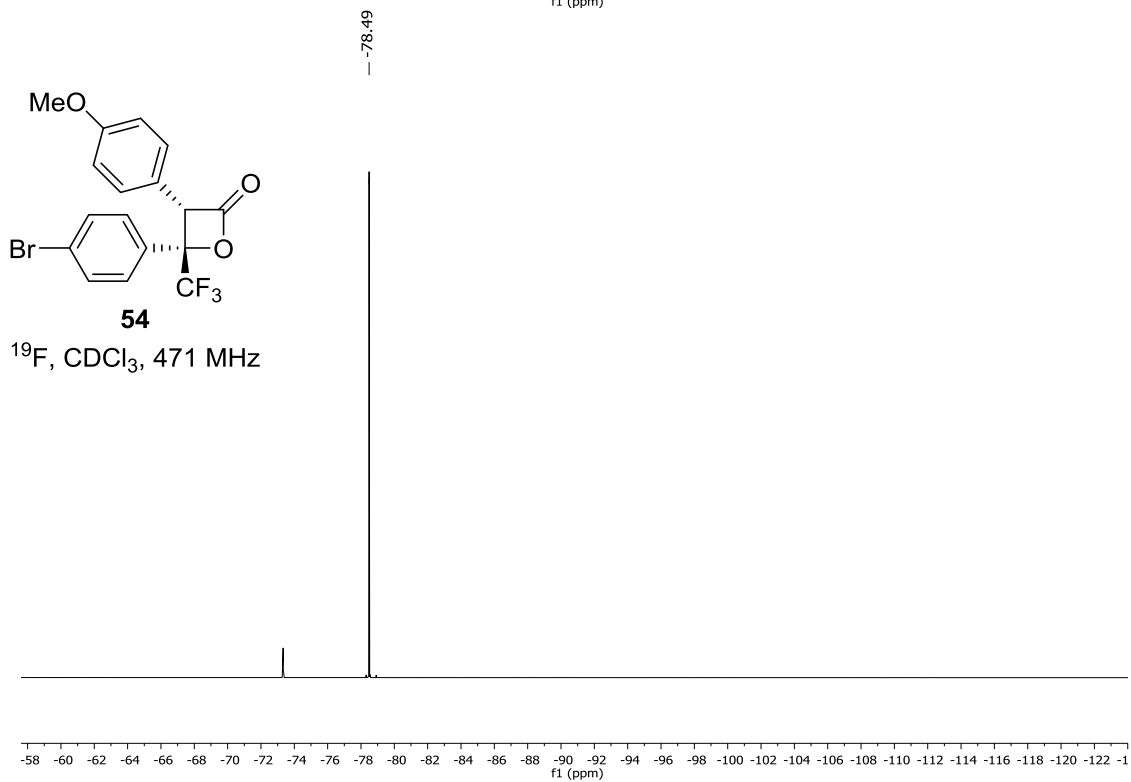

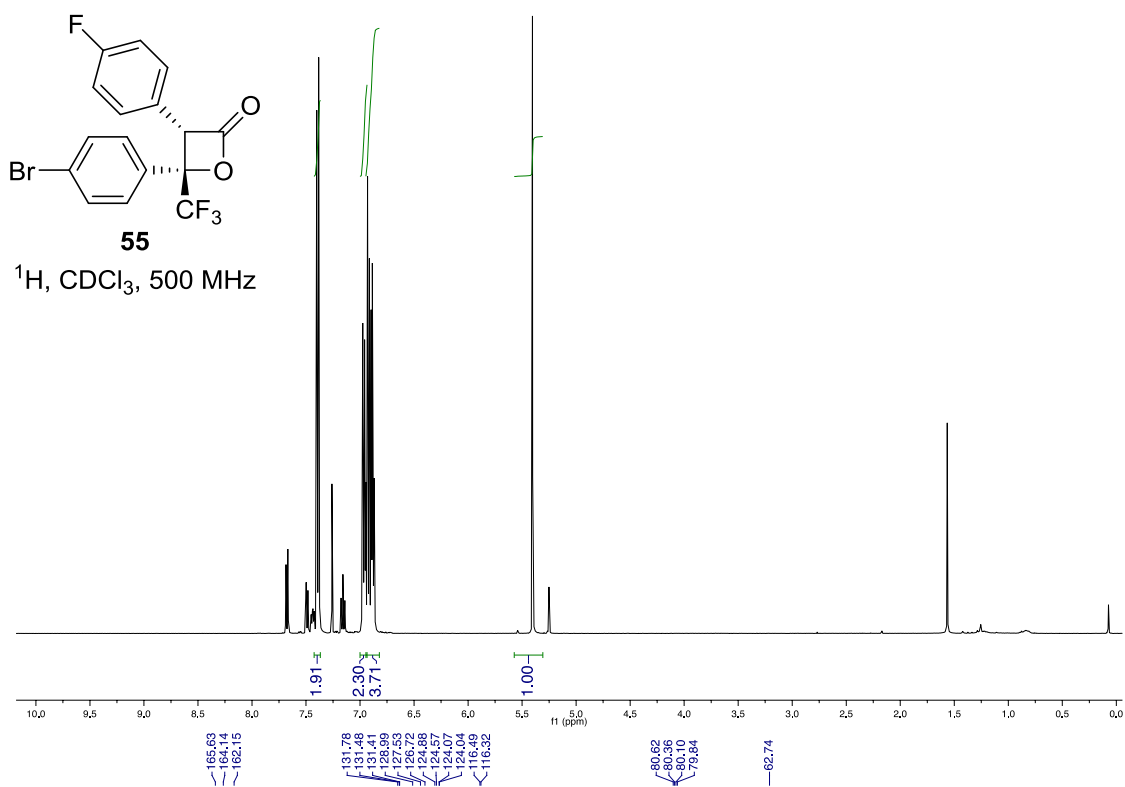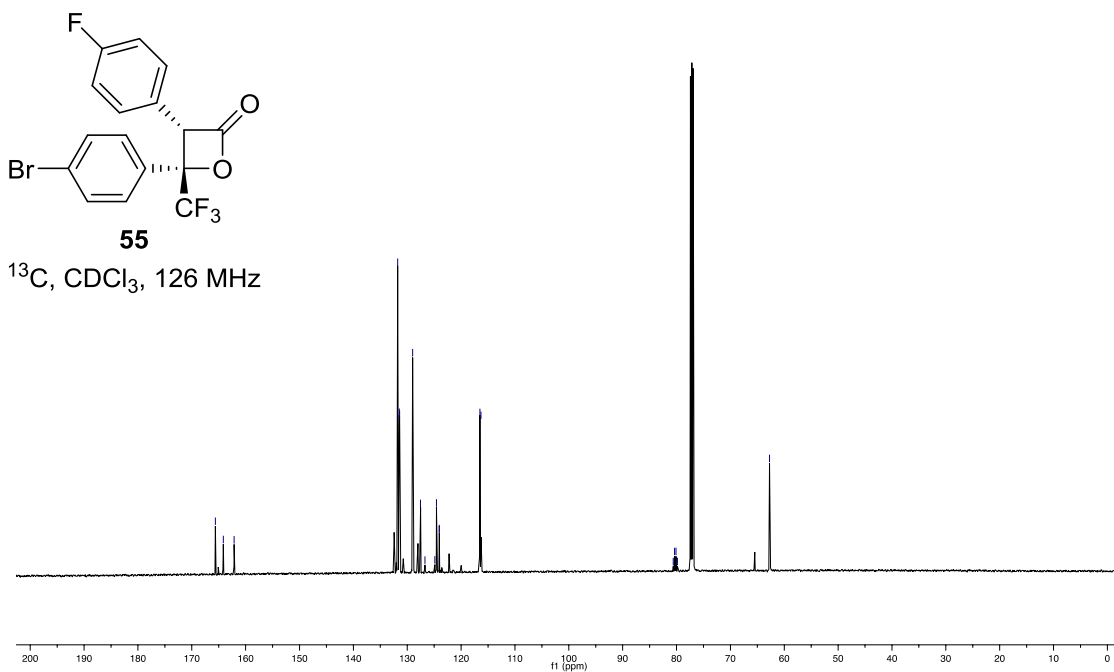

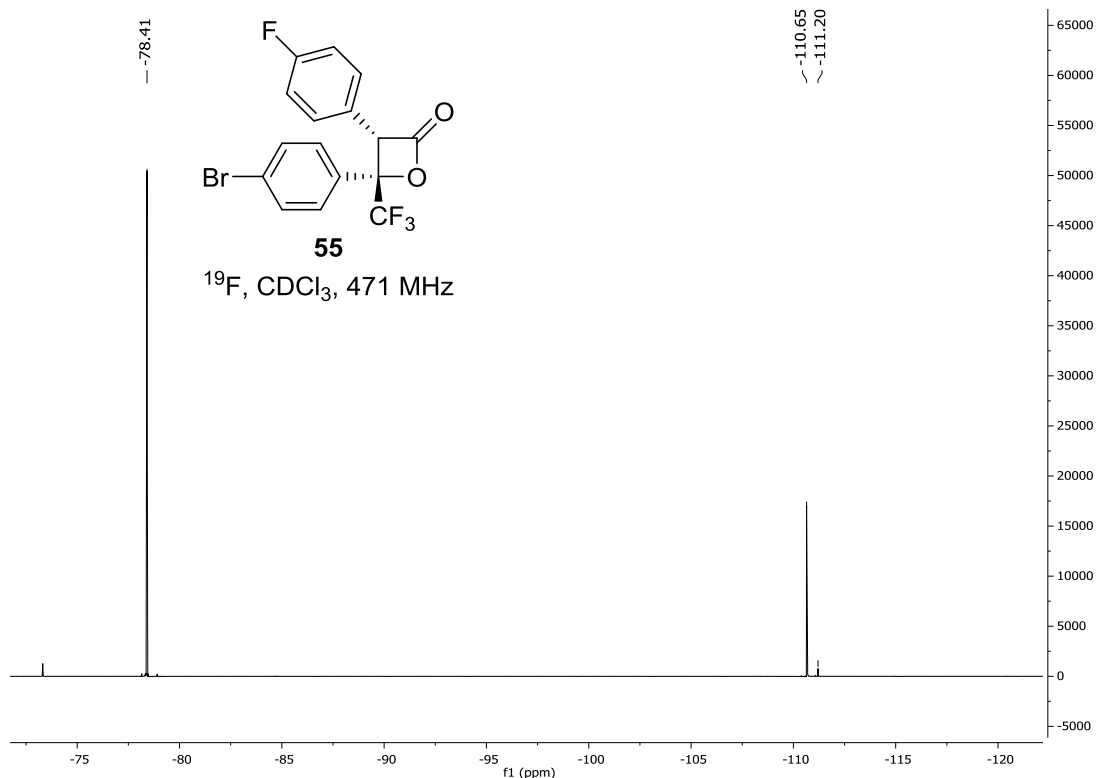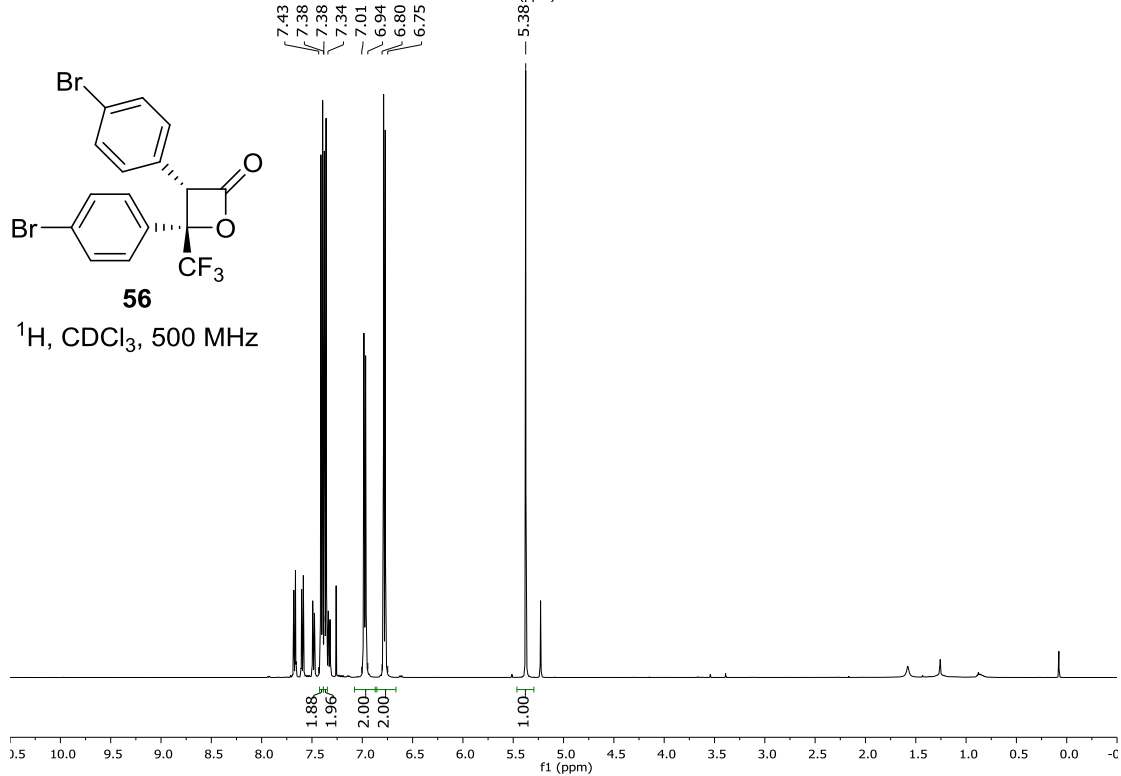

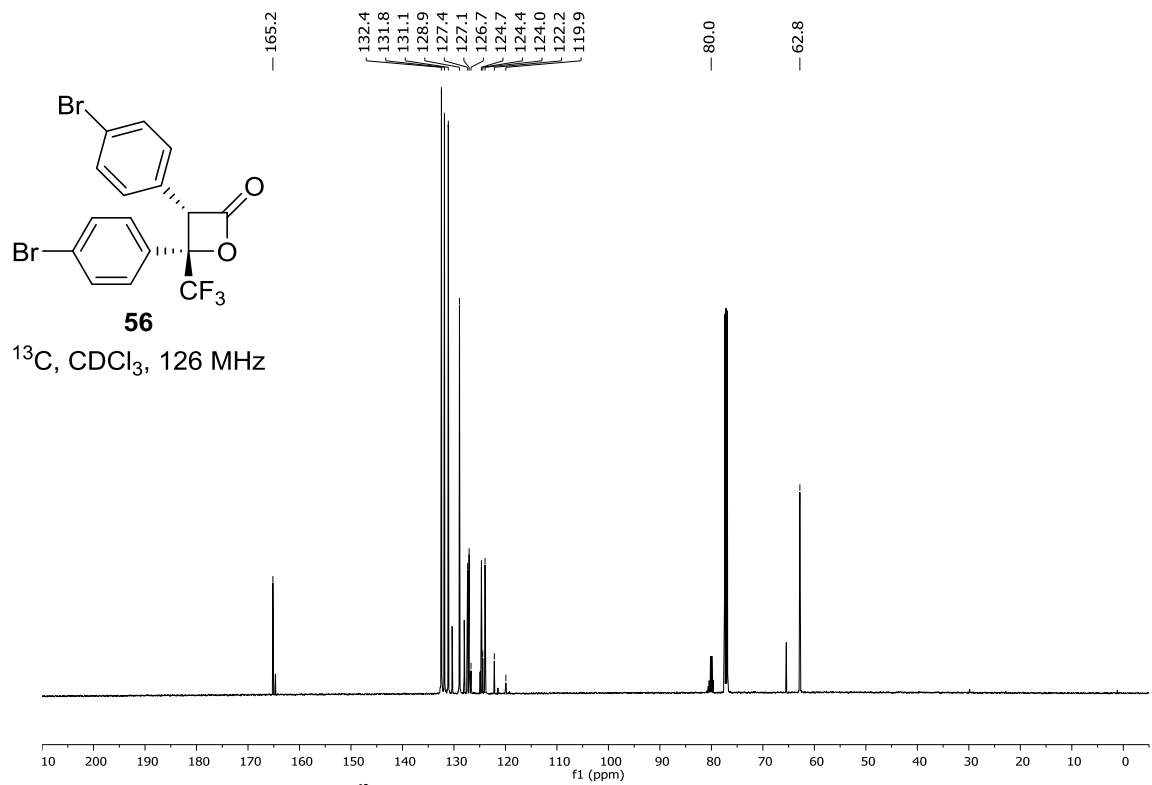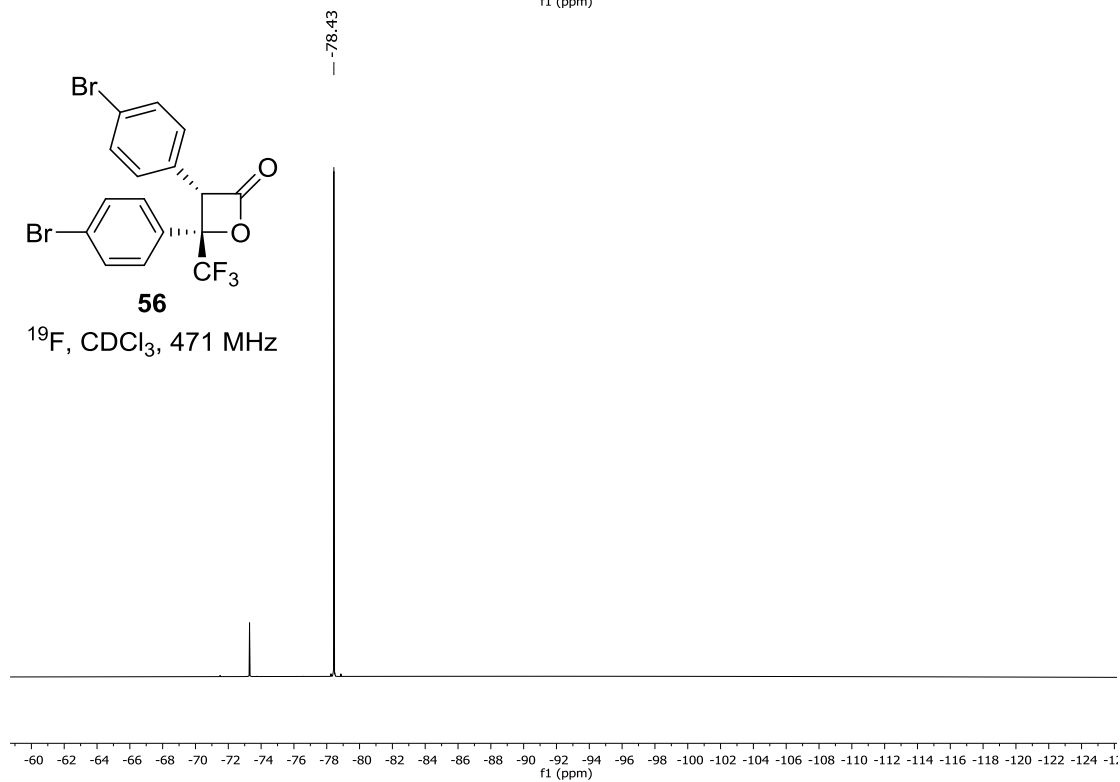

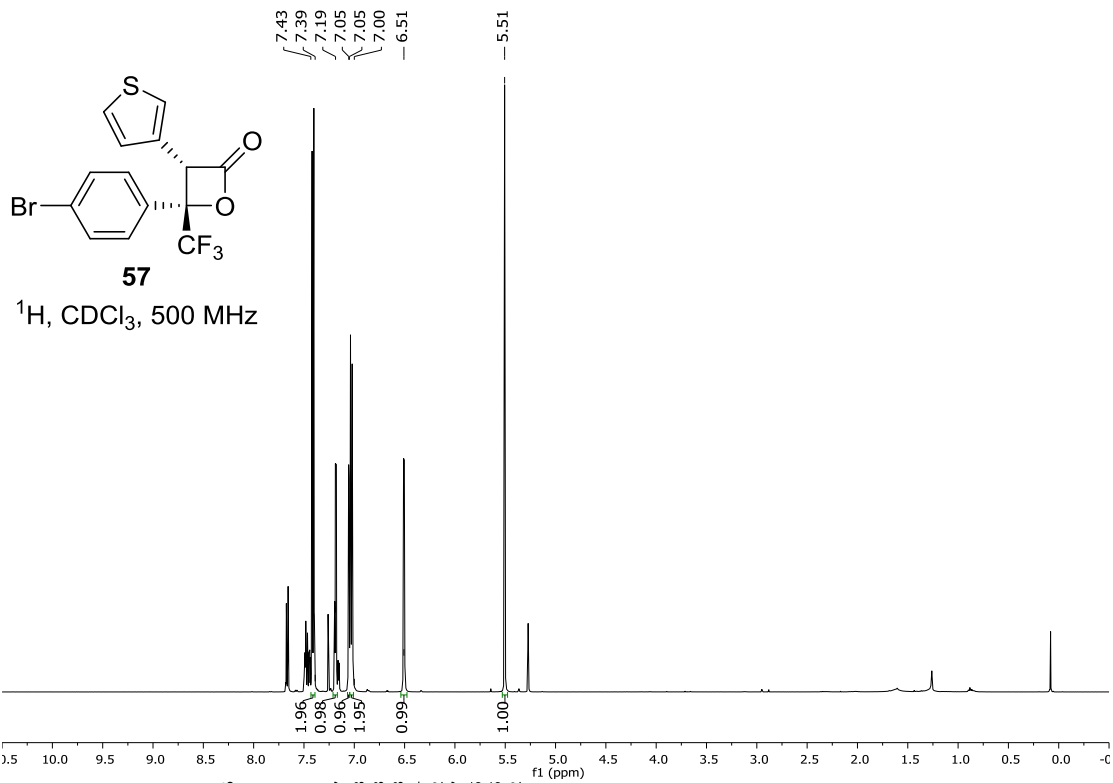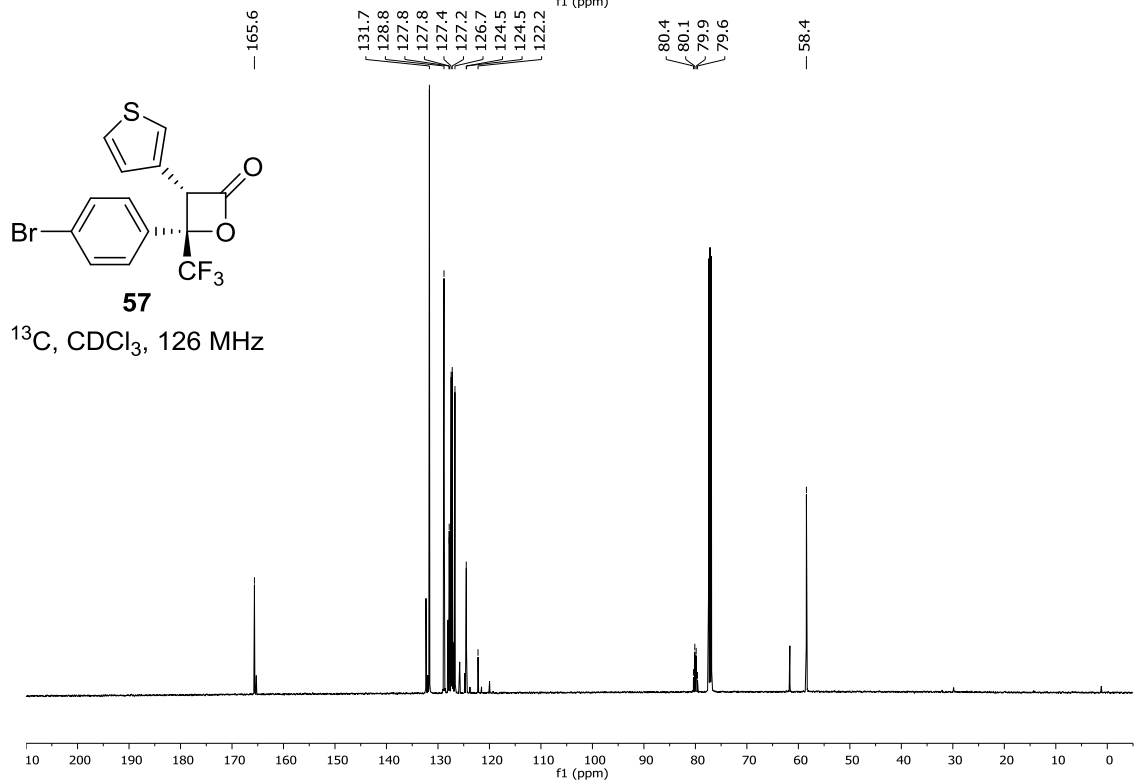

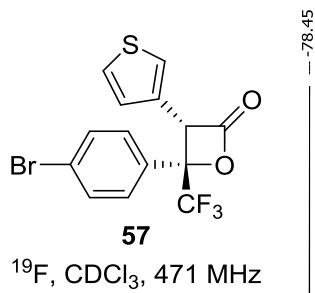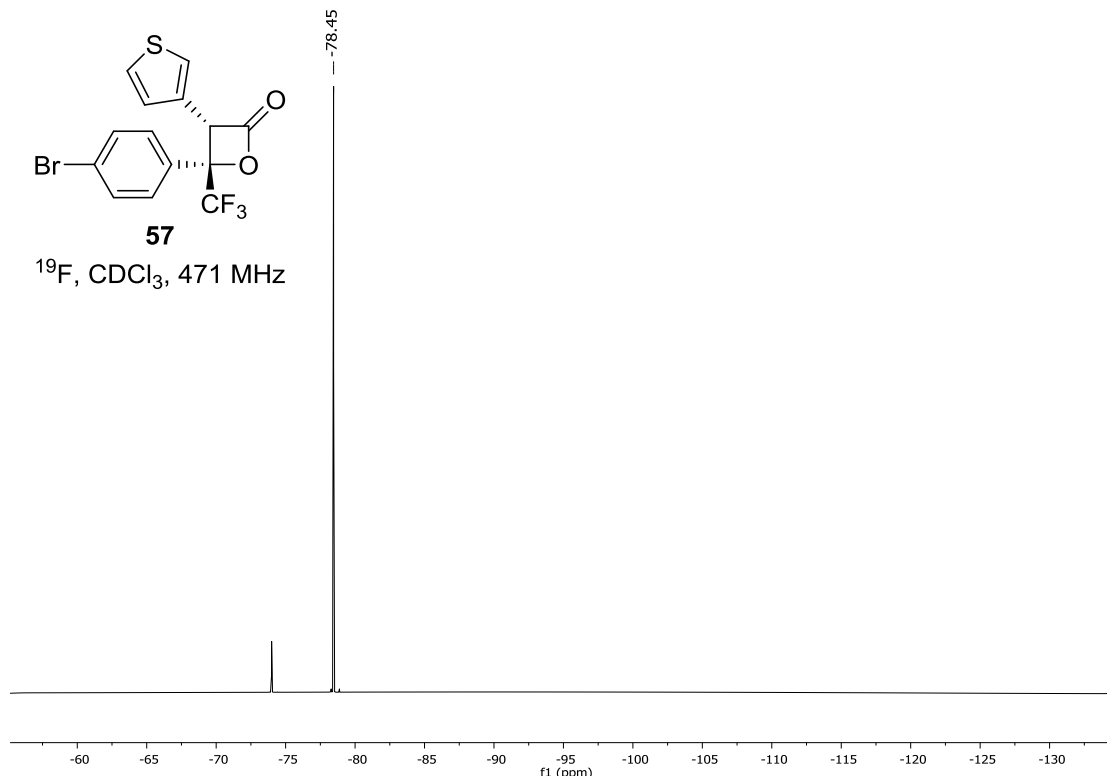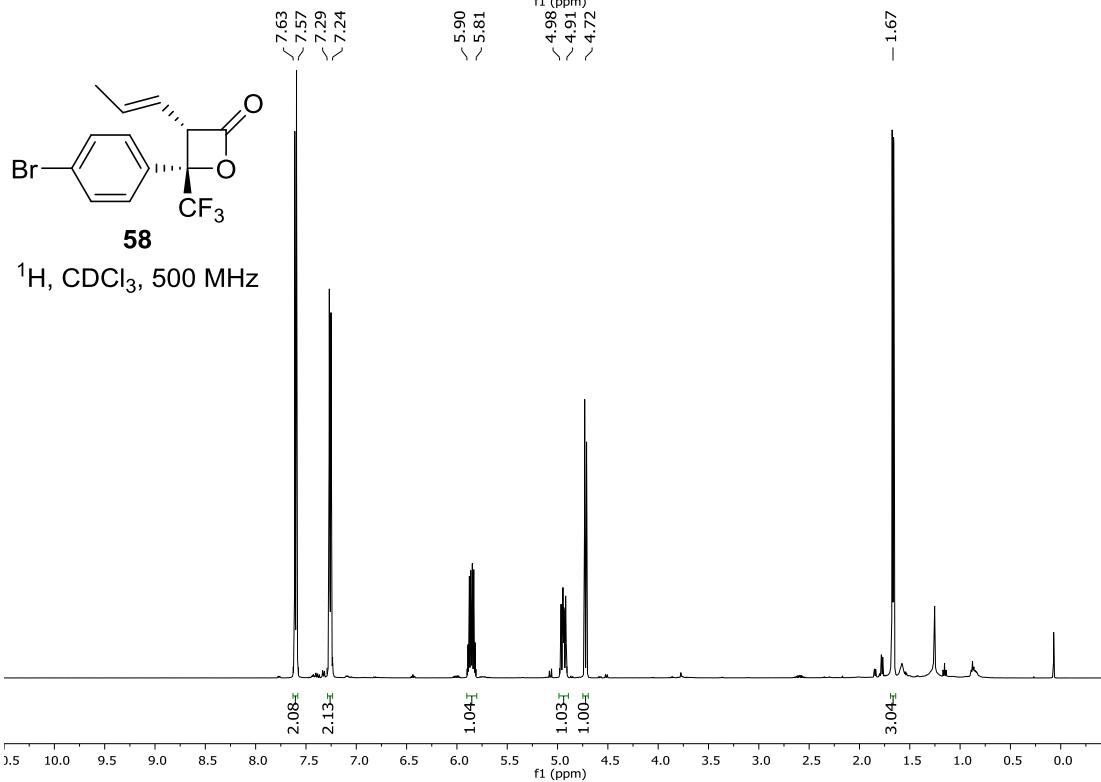



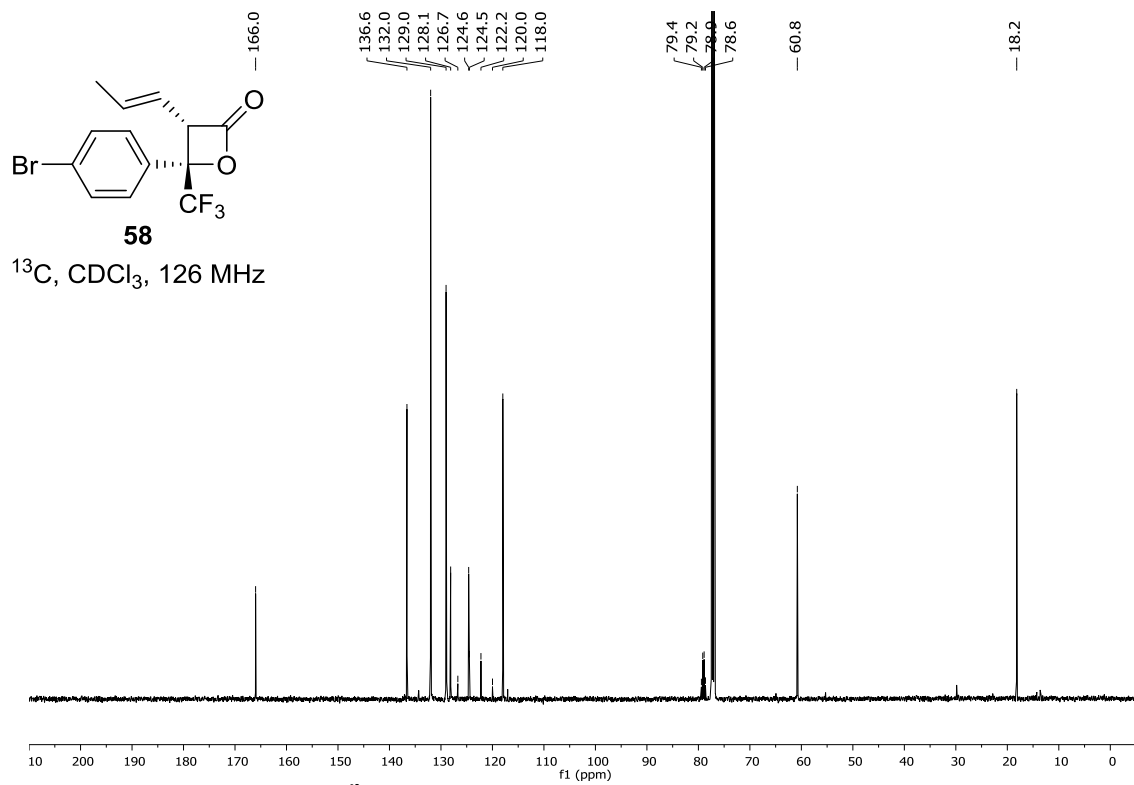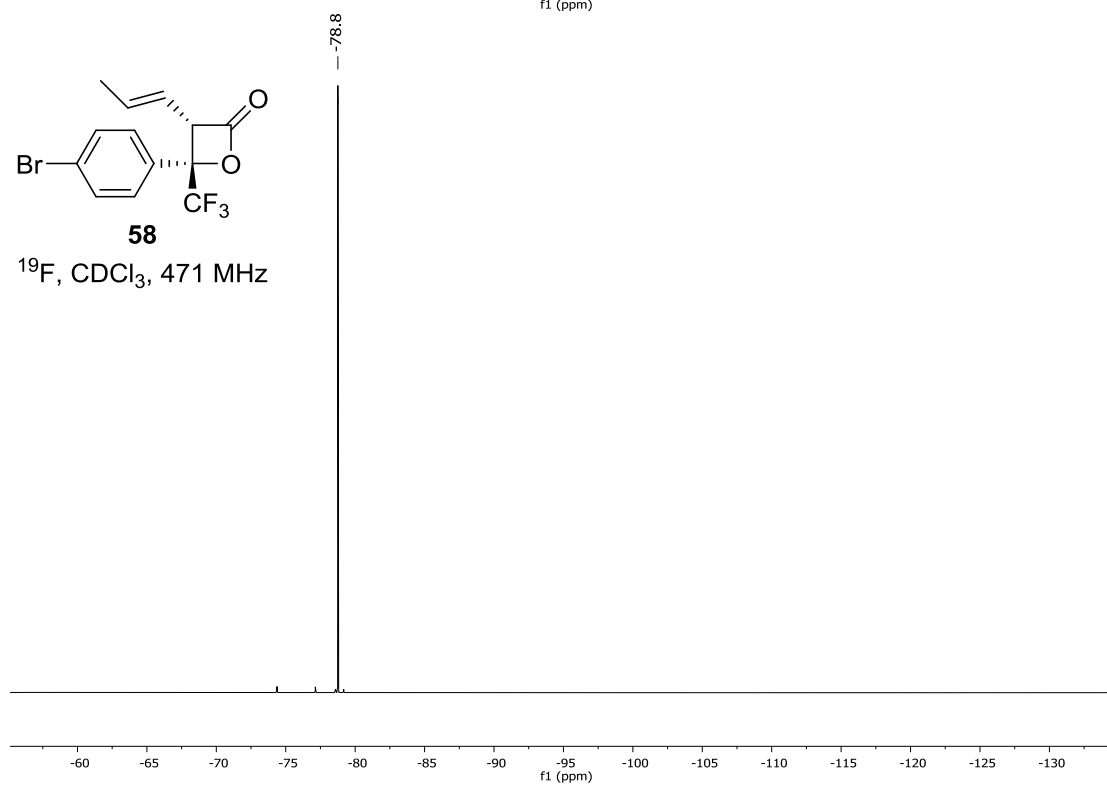

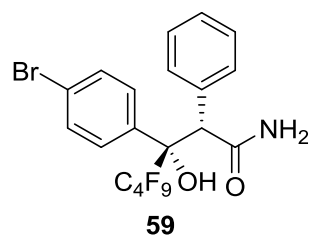

$^1\text{H}$ ,  $\text{CDCl}_3$ , 500 MHz

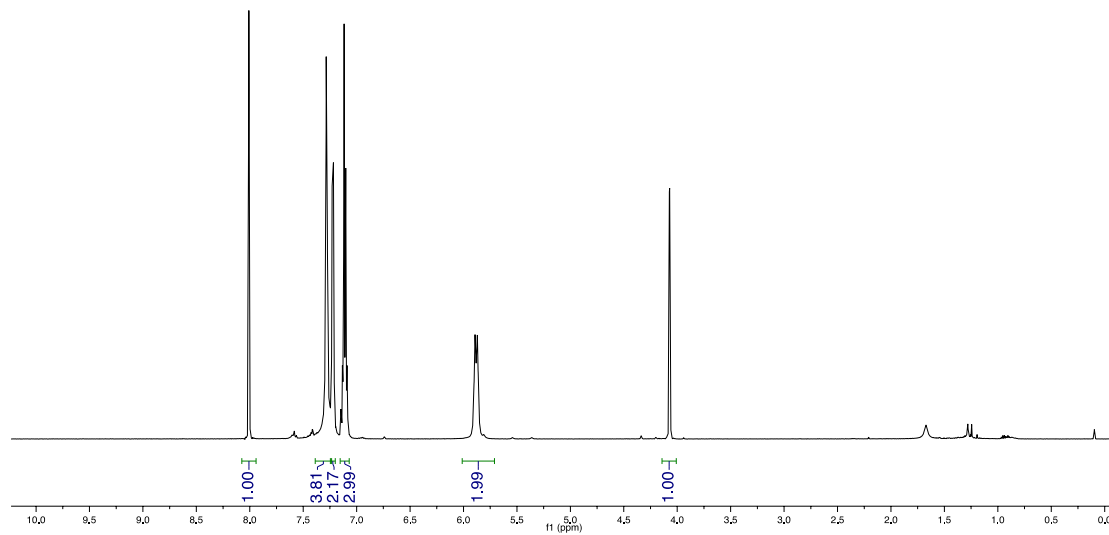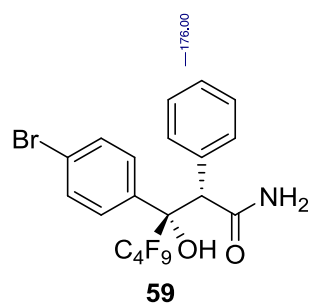

$^{13}\text{C}$ ,  $\text{CDCl}_3$ , 126 MHz

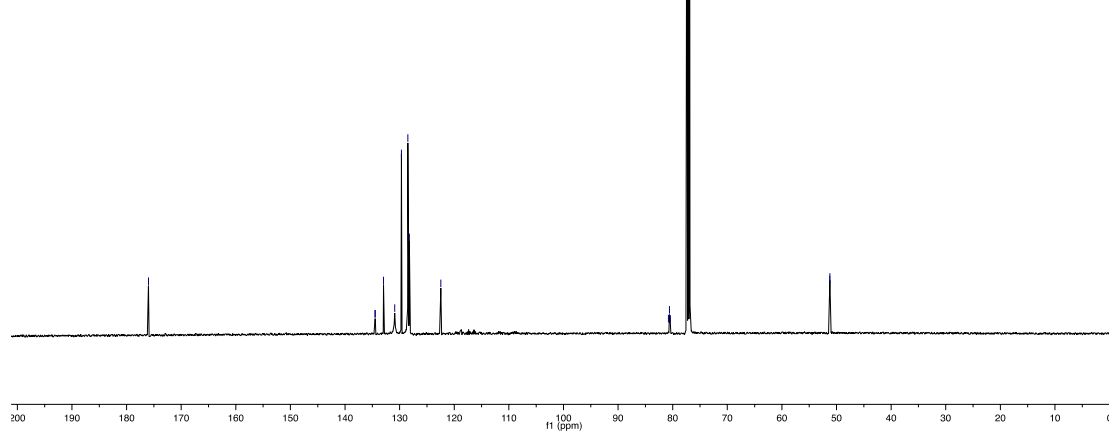

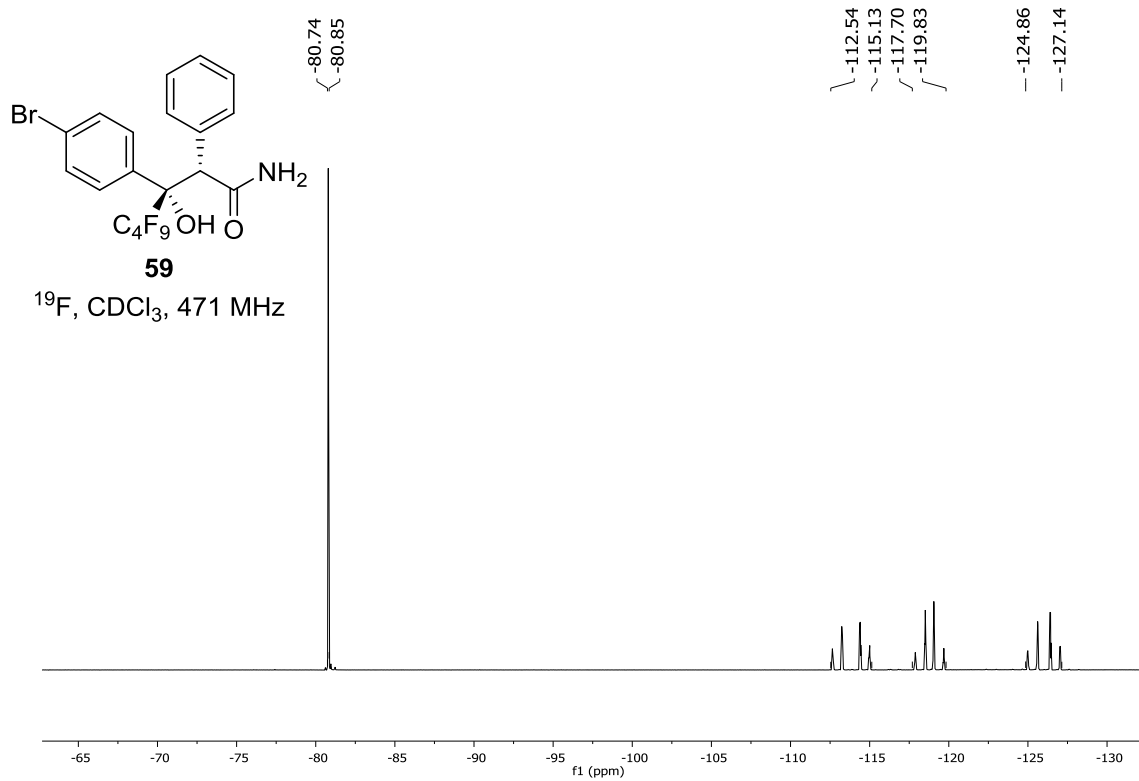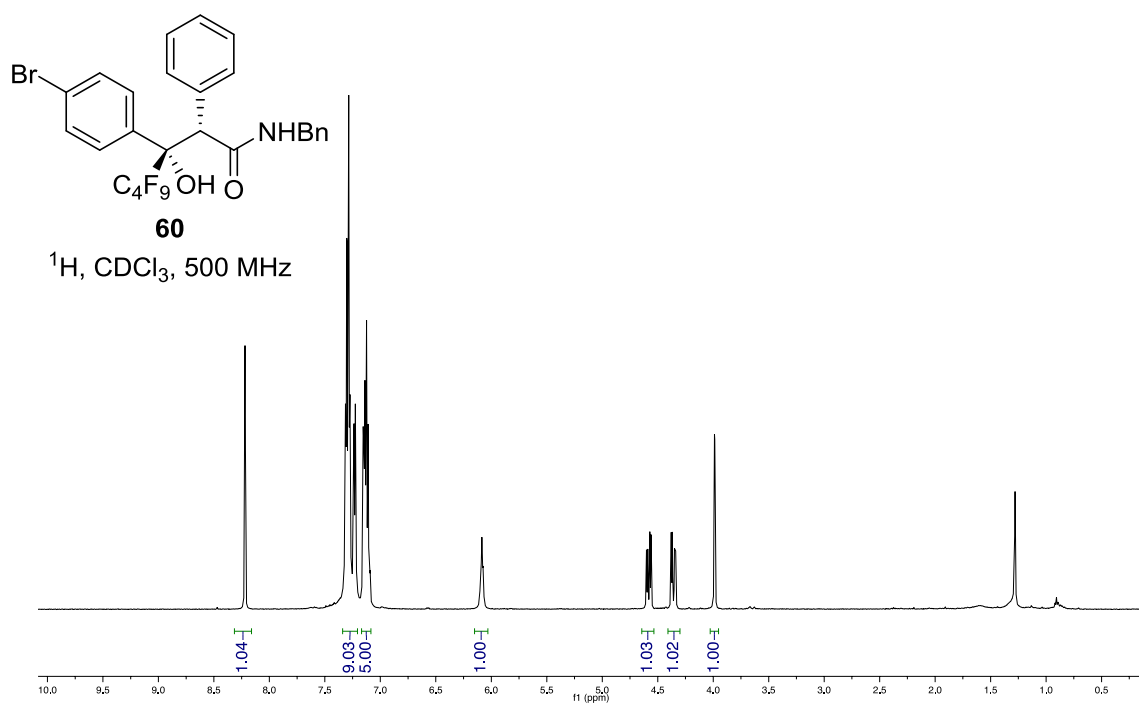

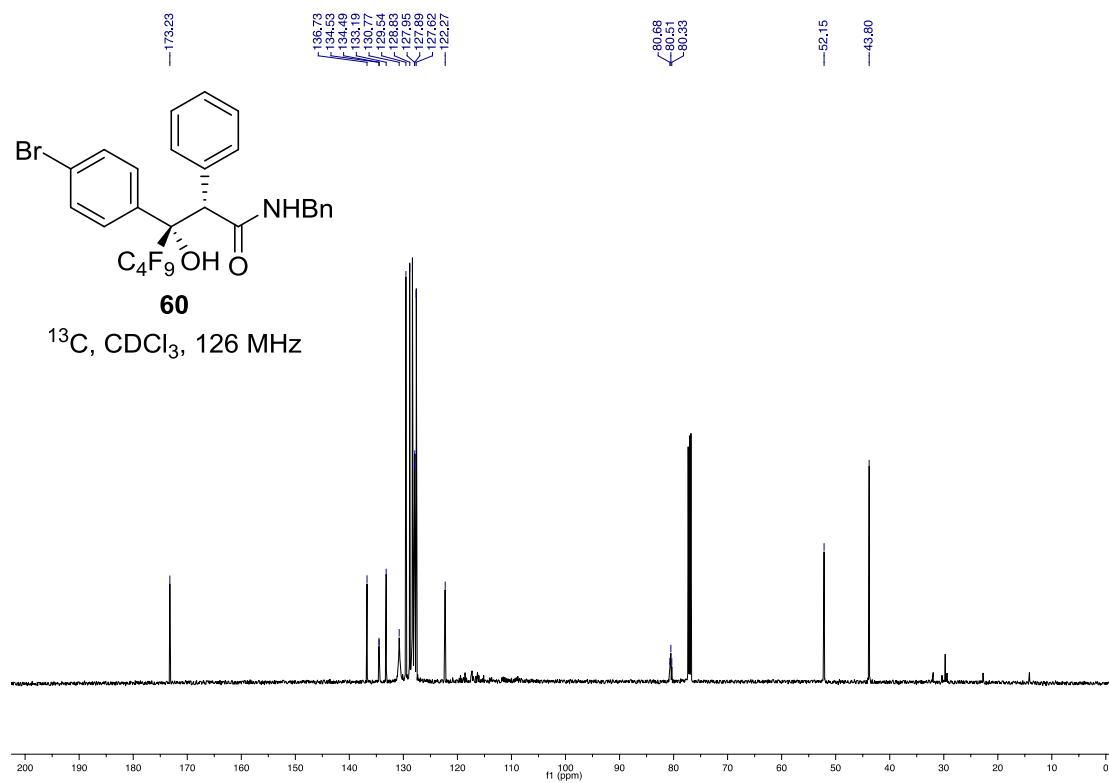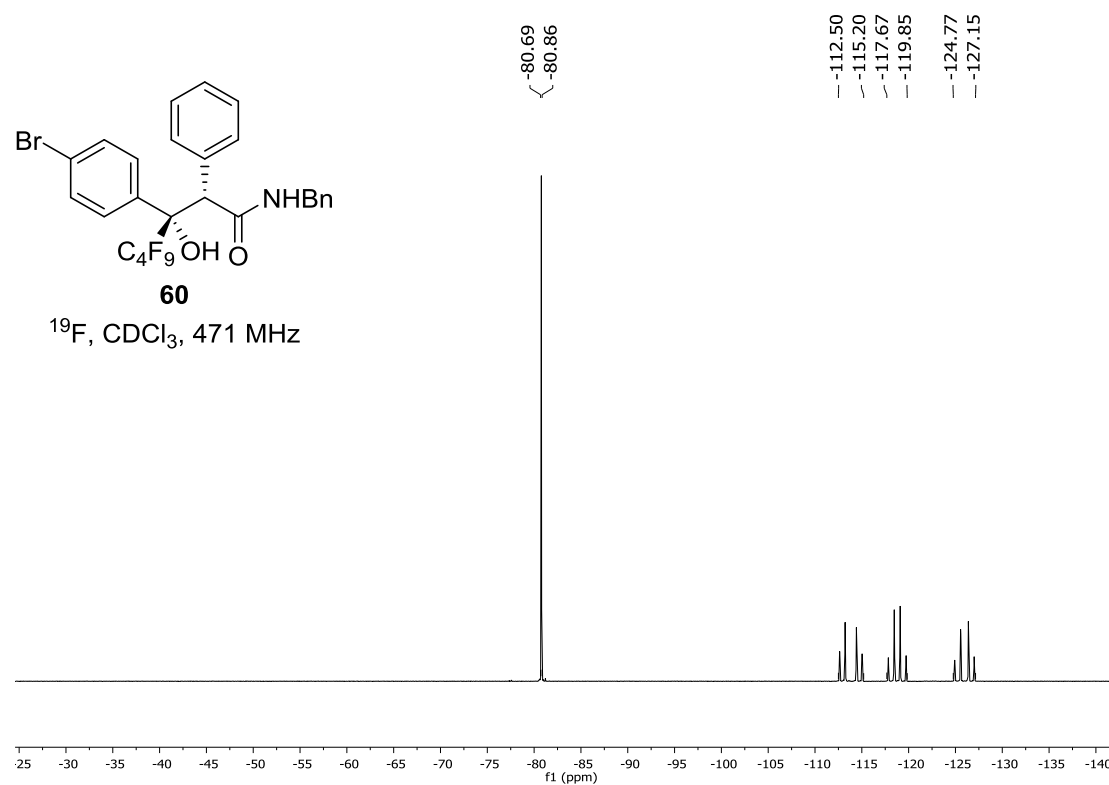

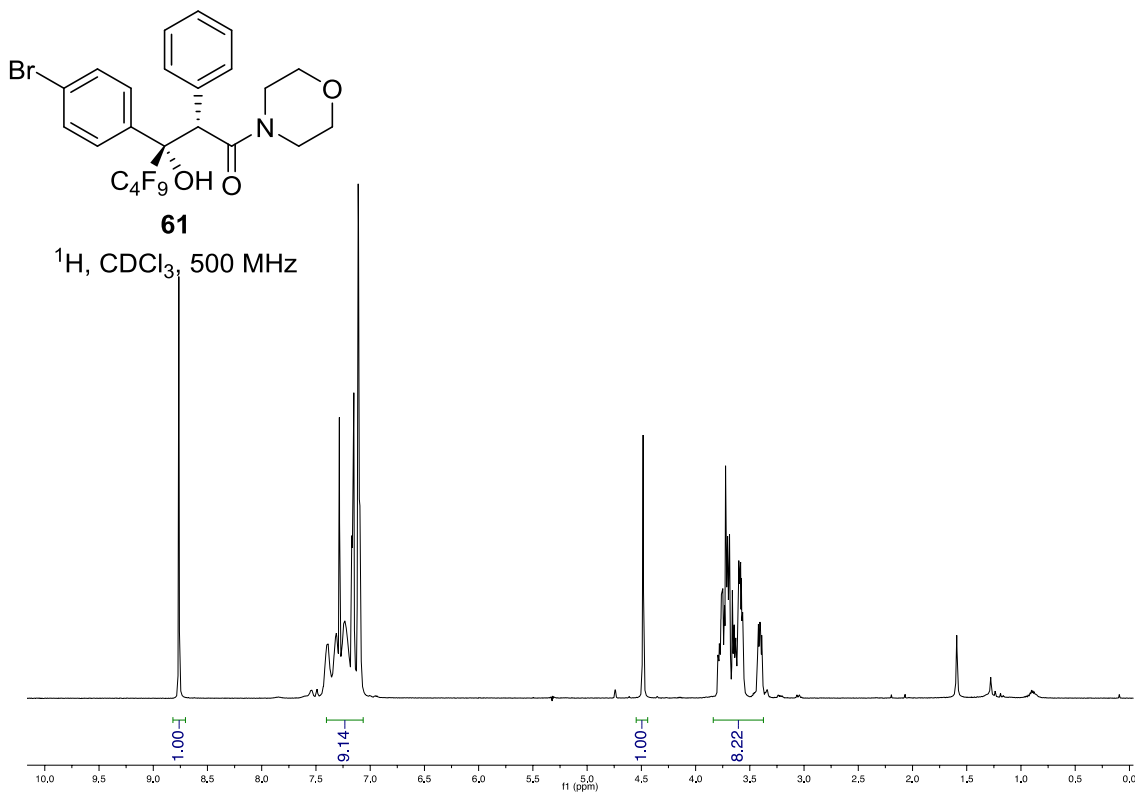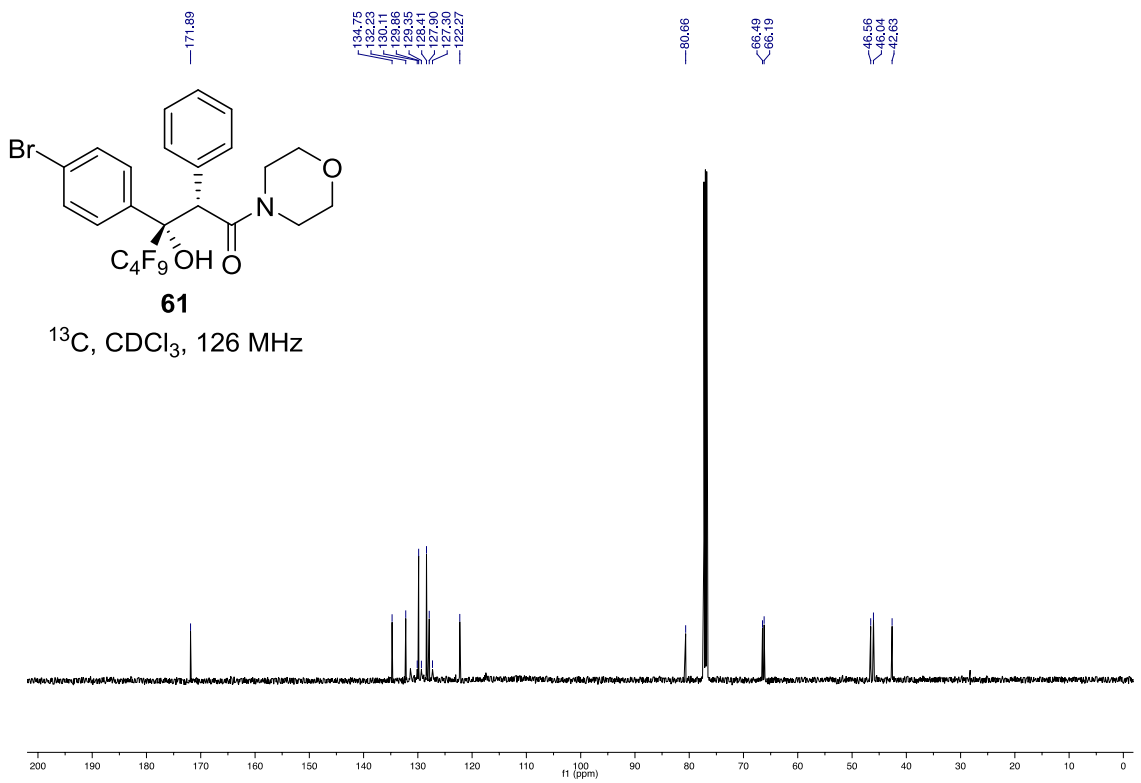

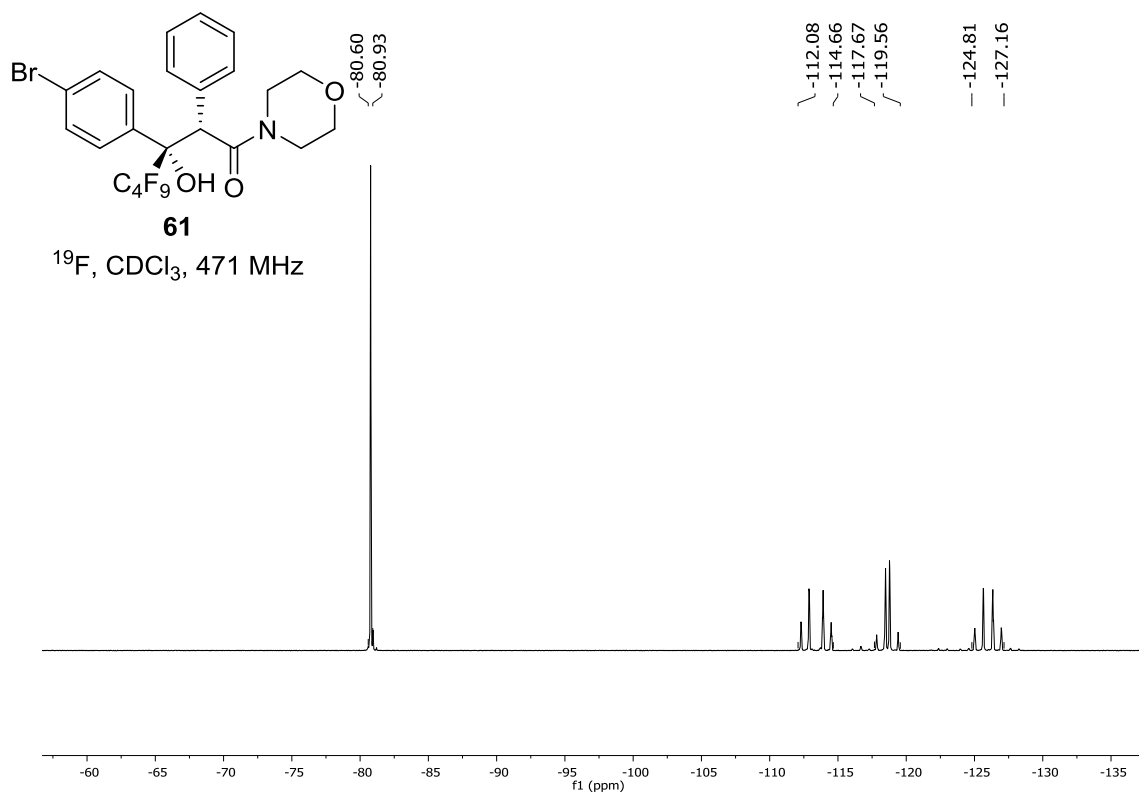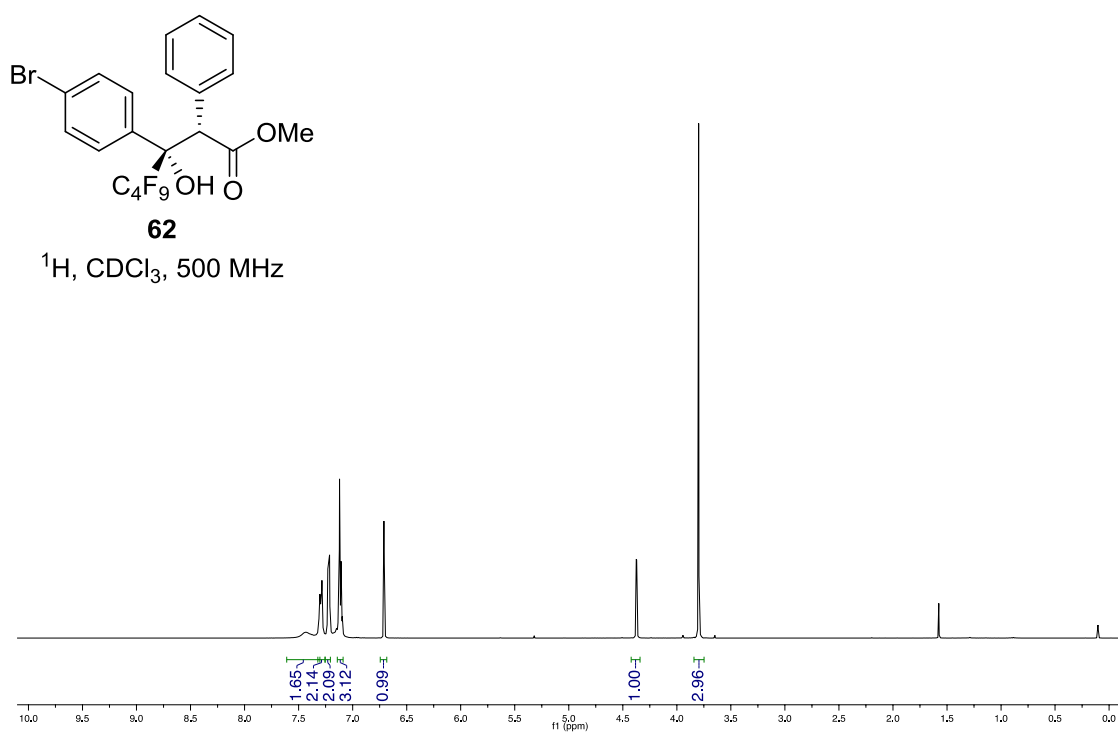

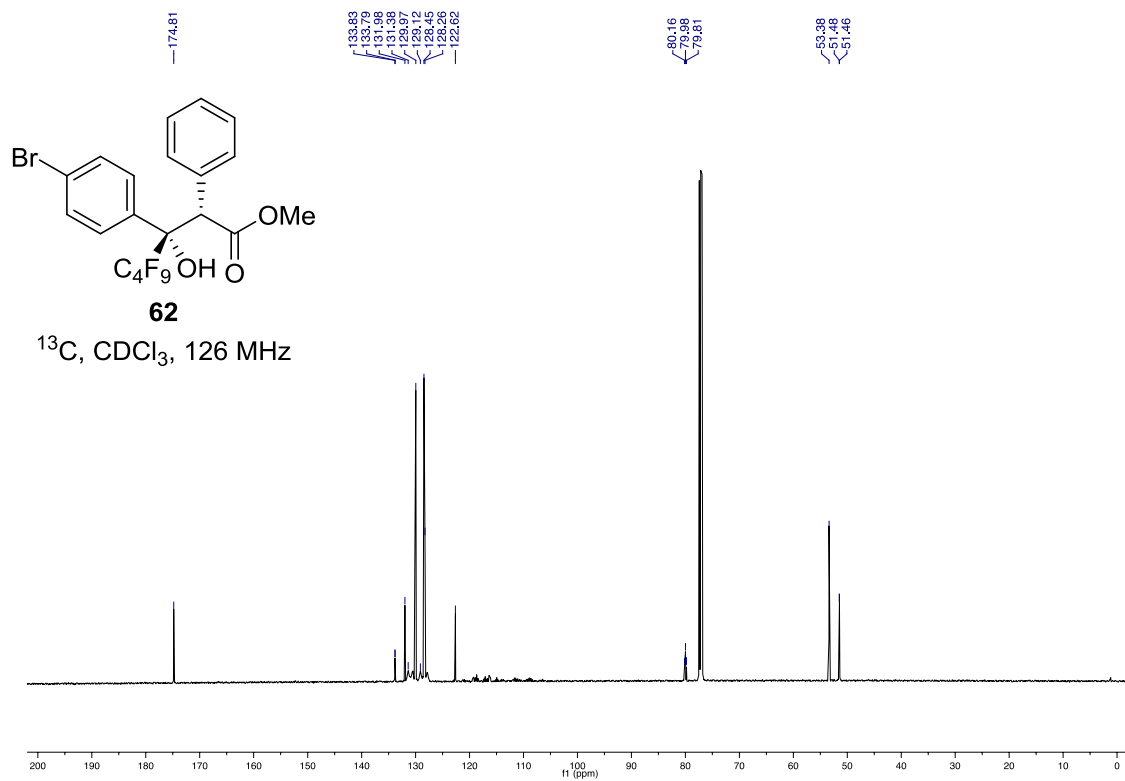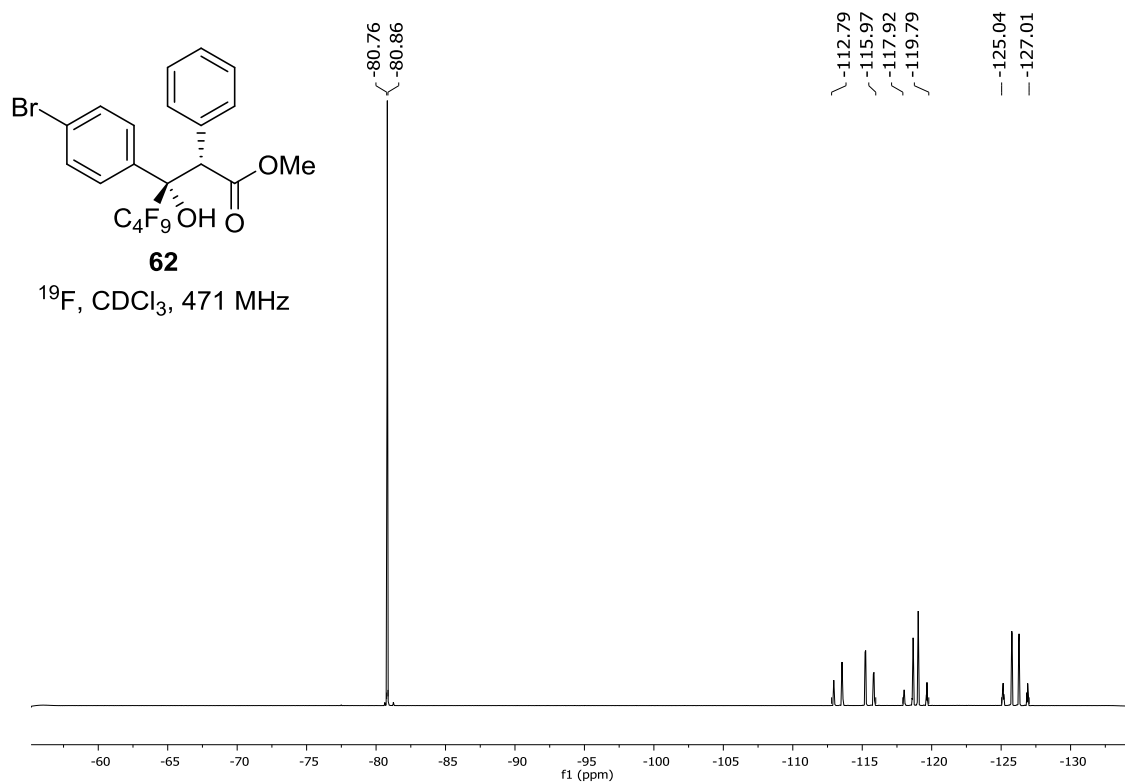

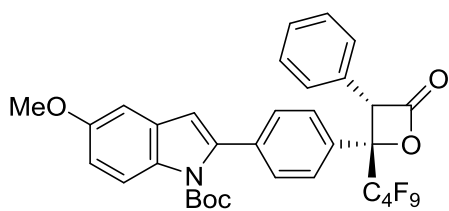

**64**

$^1\text{H}$ ,  $\text{CDCl}_3$ , 500 MHz

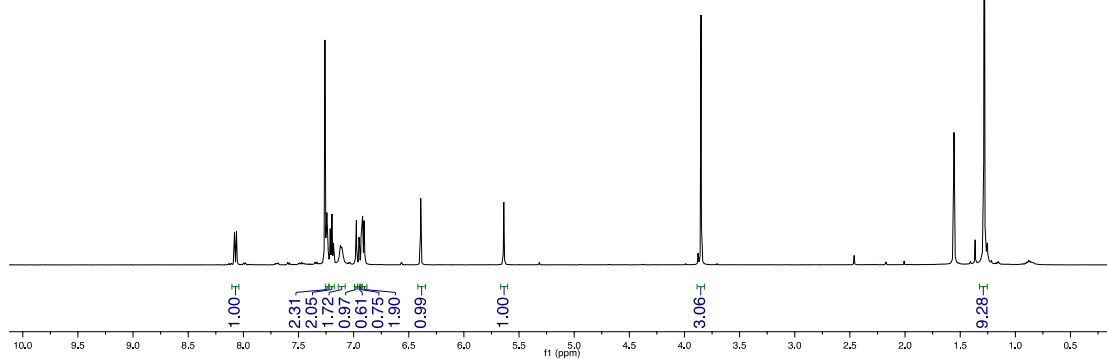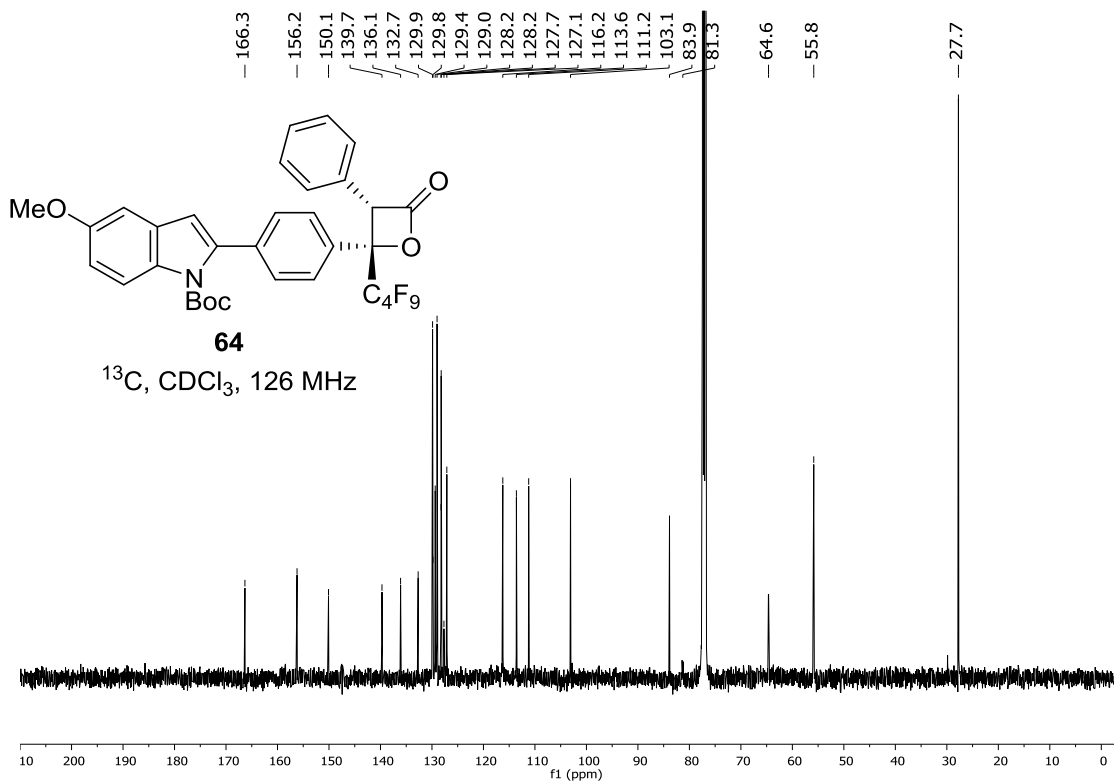

**64**

$^{13}\text{C}$ ,  $\text{CDCl}_3$ , 126 MHz



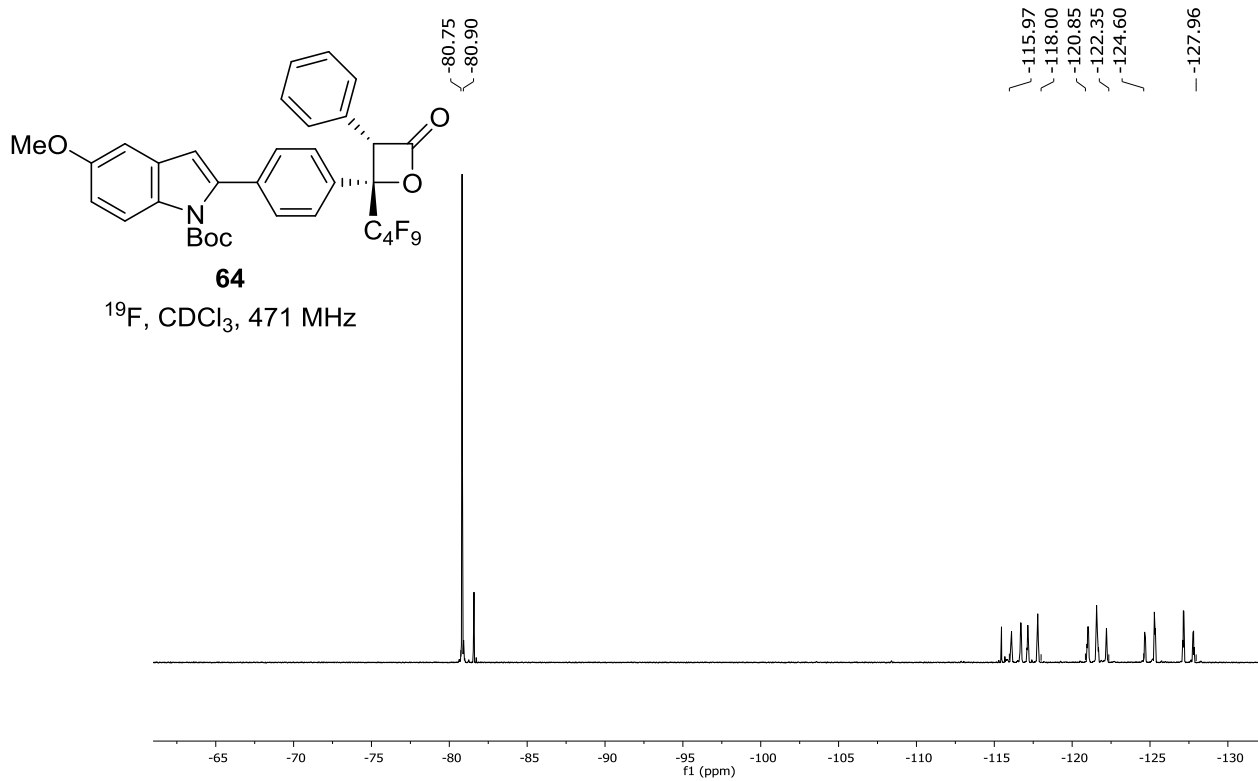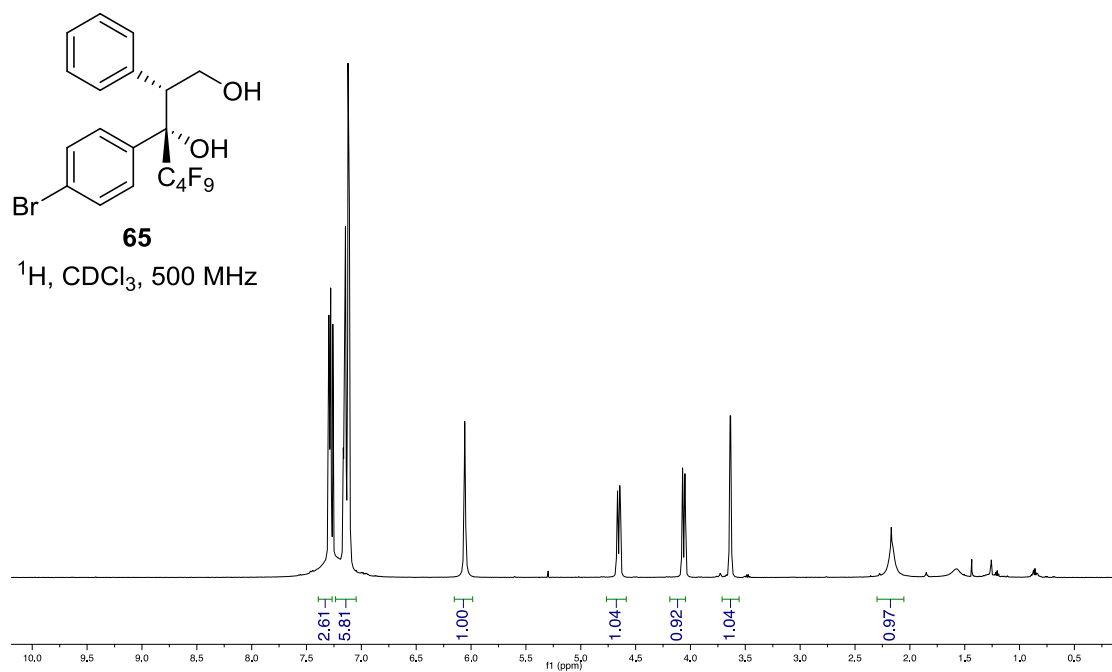

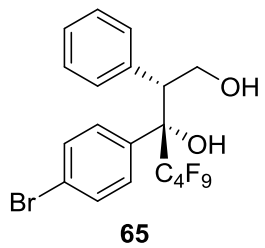

$^{13}\text{C}$ ,  $\text{CDCl}_3$ , 126 MHz

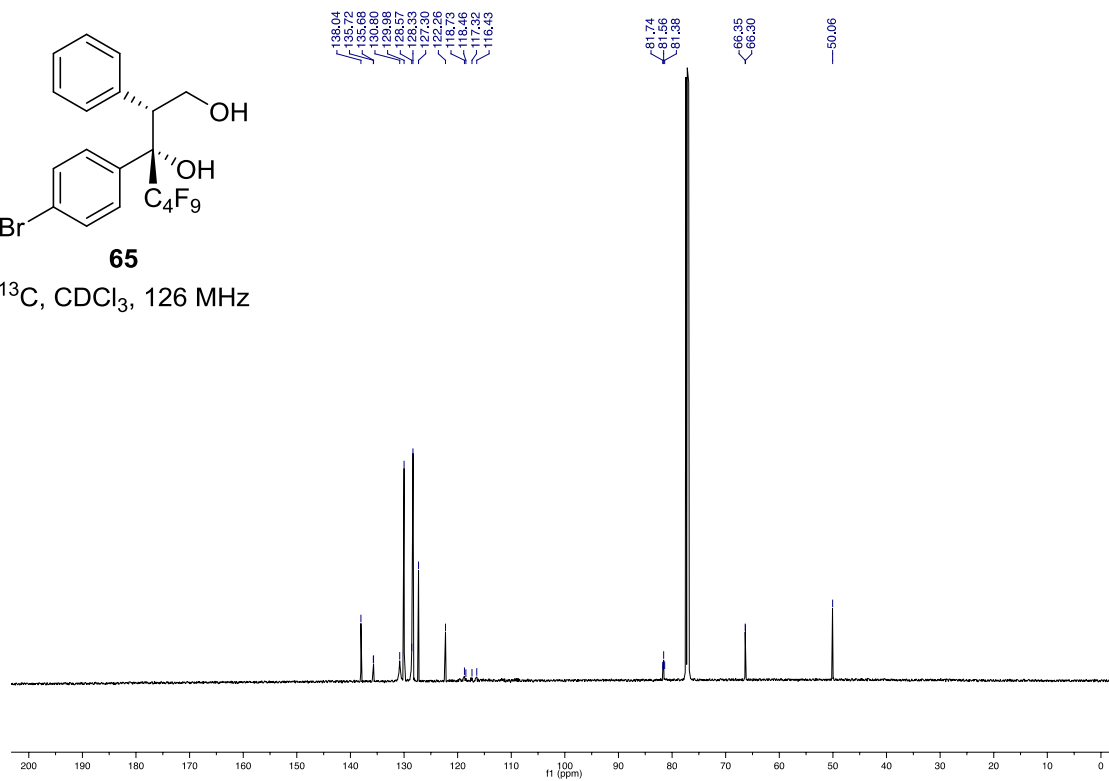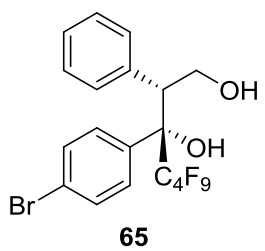

$^{19}\text{F}$ ,  $\text{CDCl}_3$ , 471 MHz

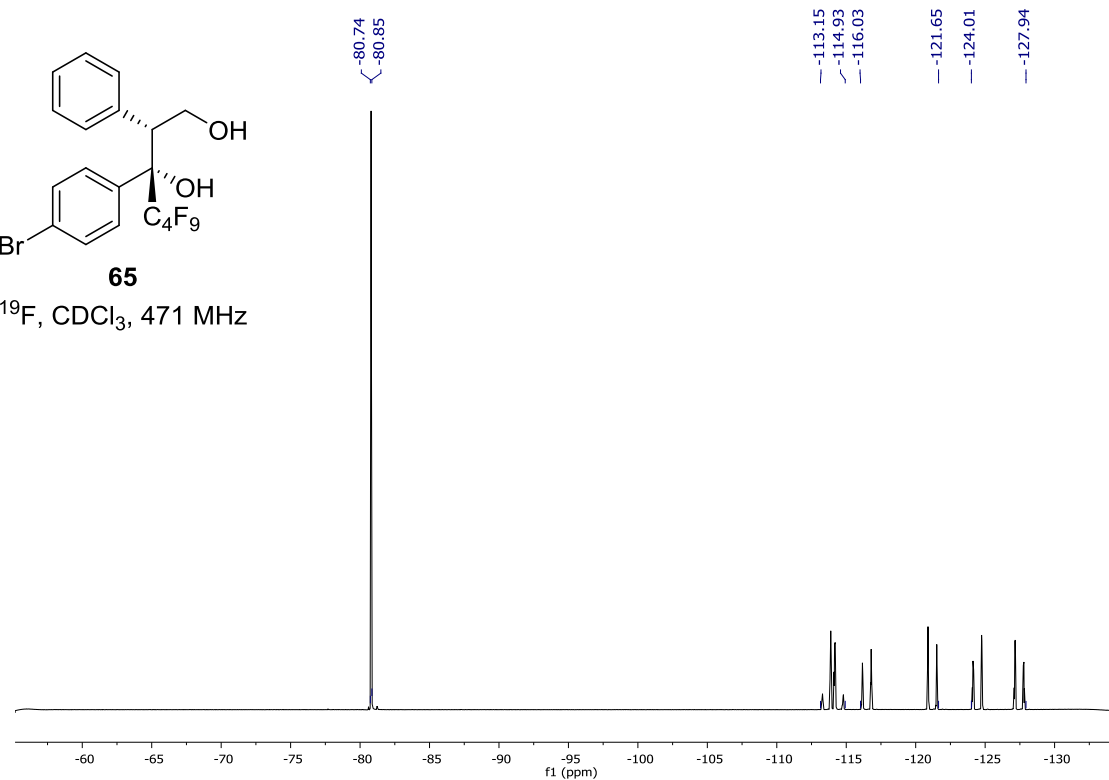

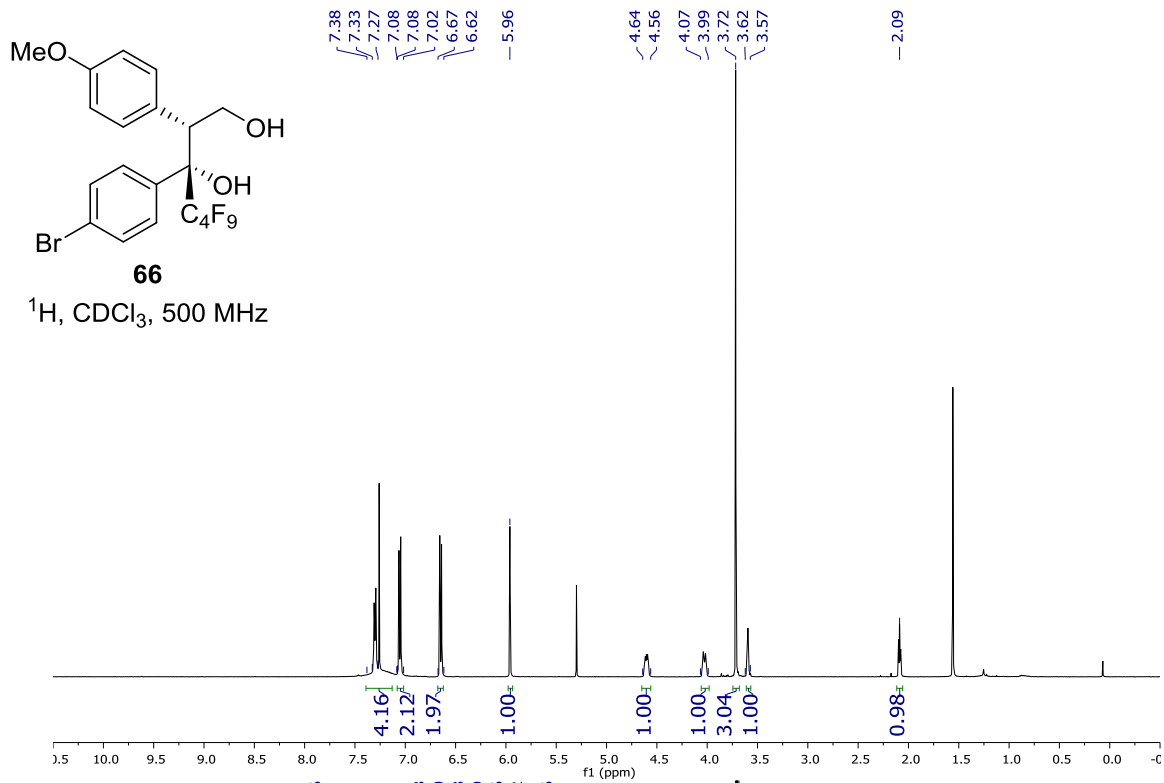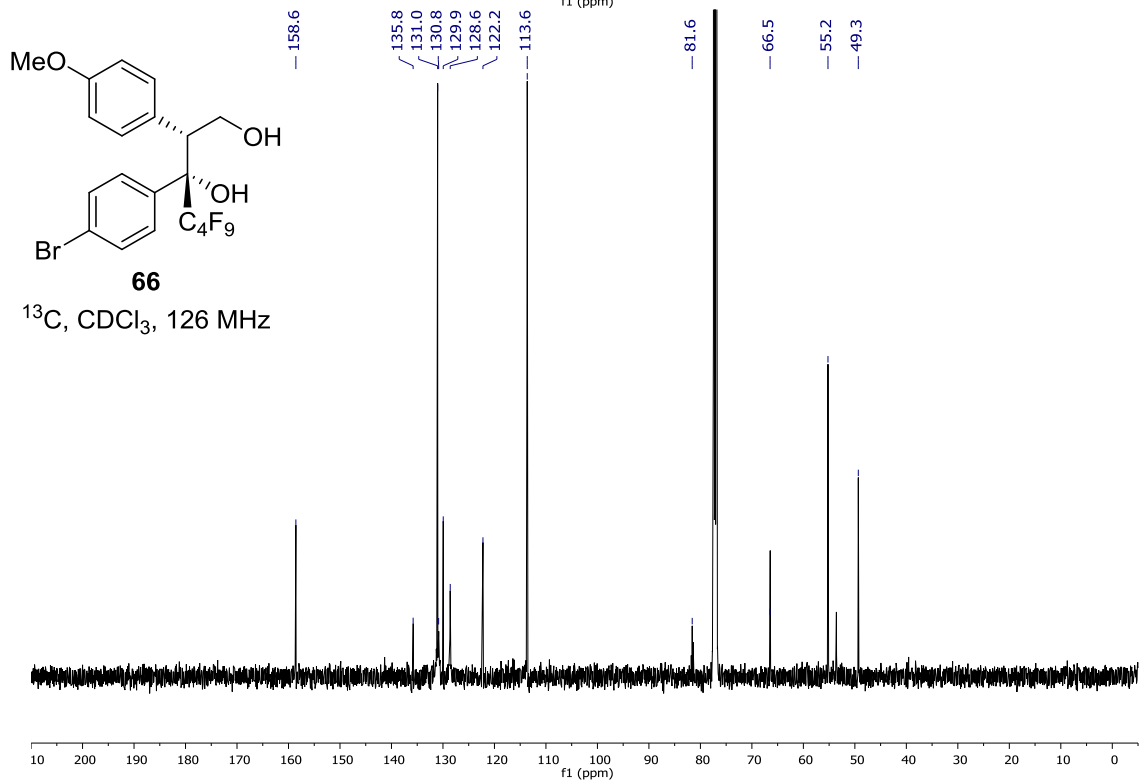

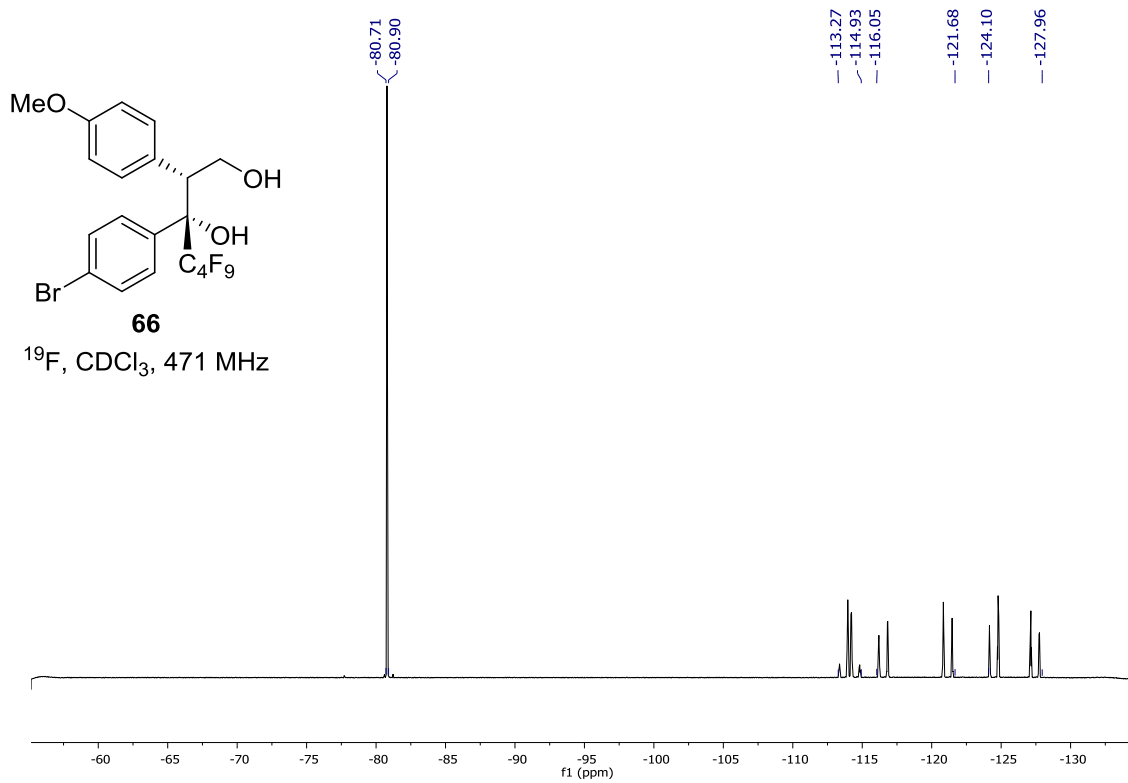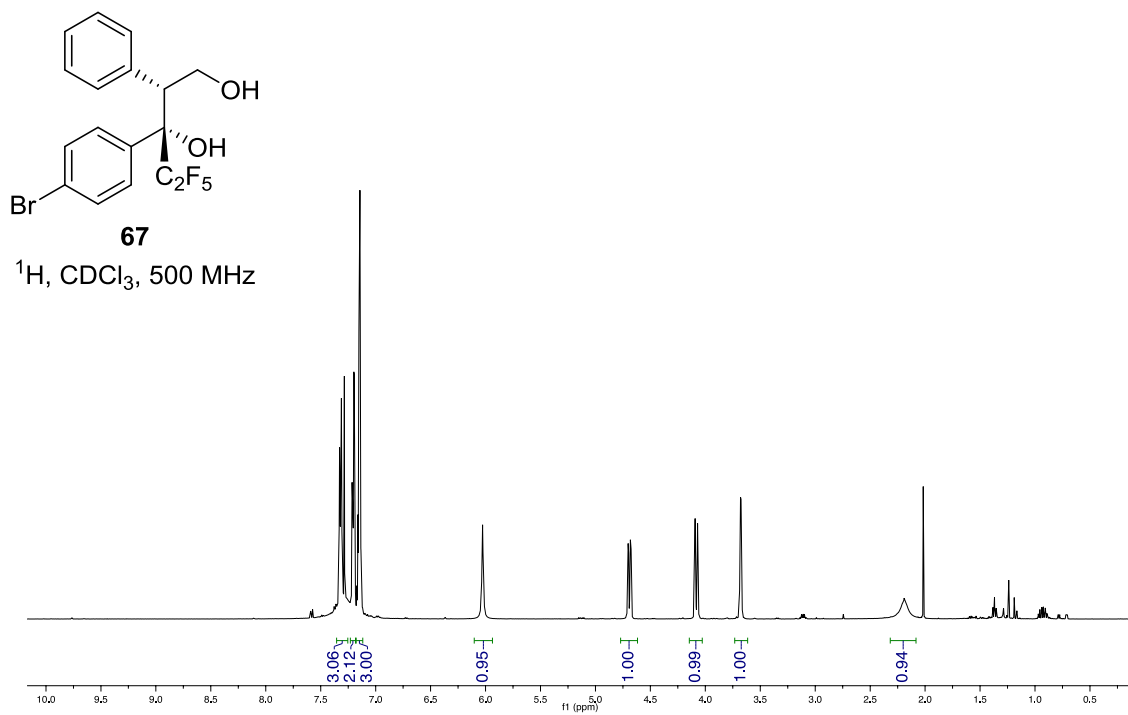

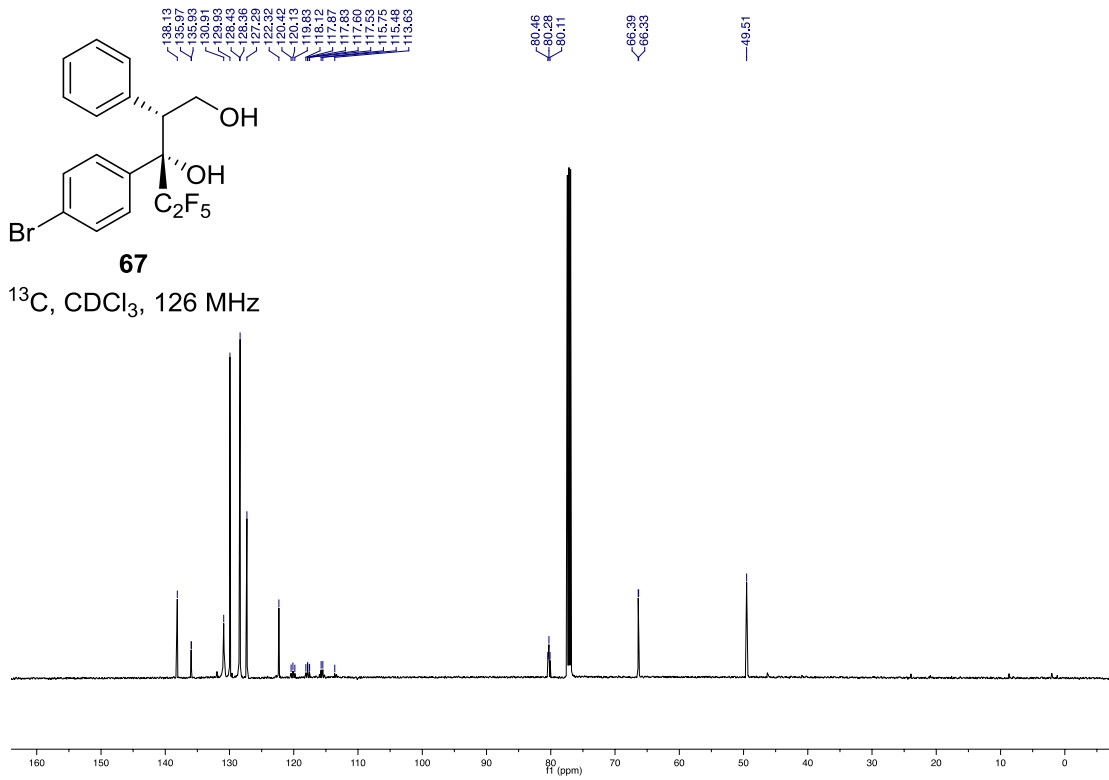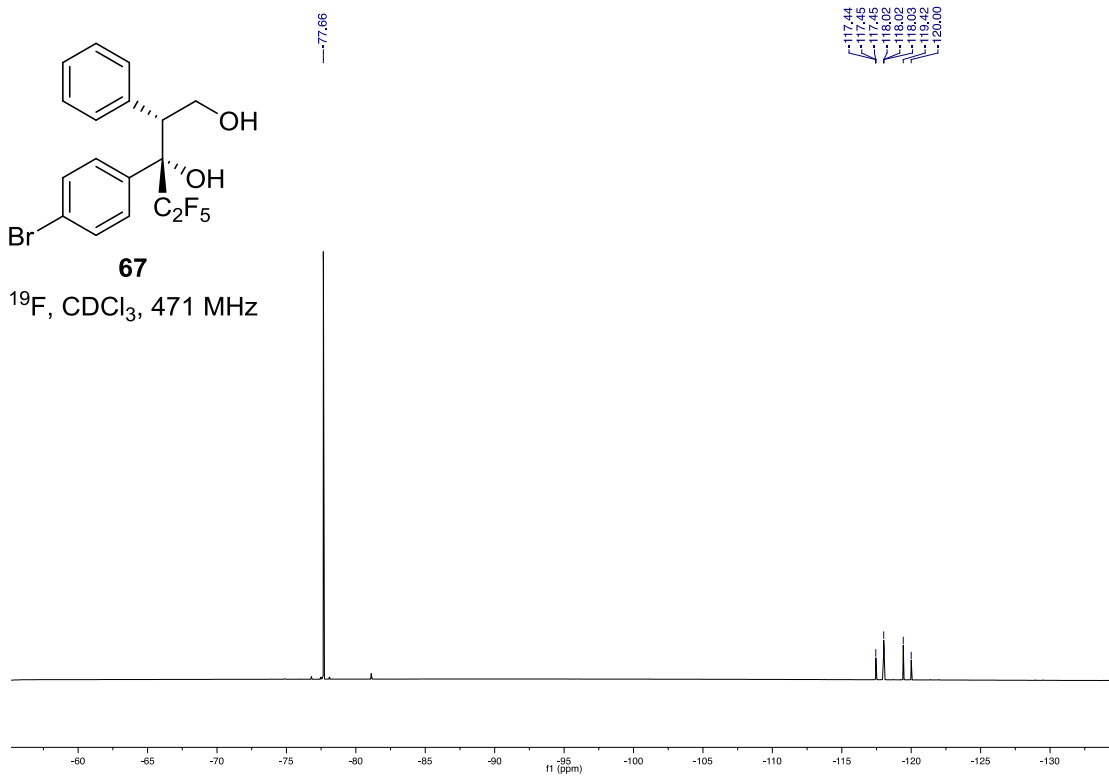

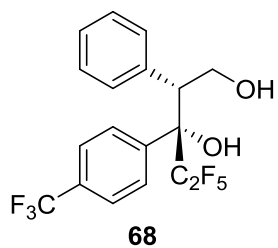

$^1\text{H}$ ,  $\text{CDCl}_3$ , 500 MHz

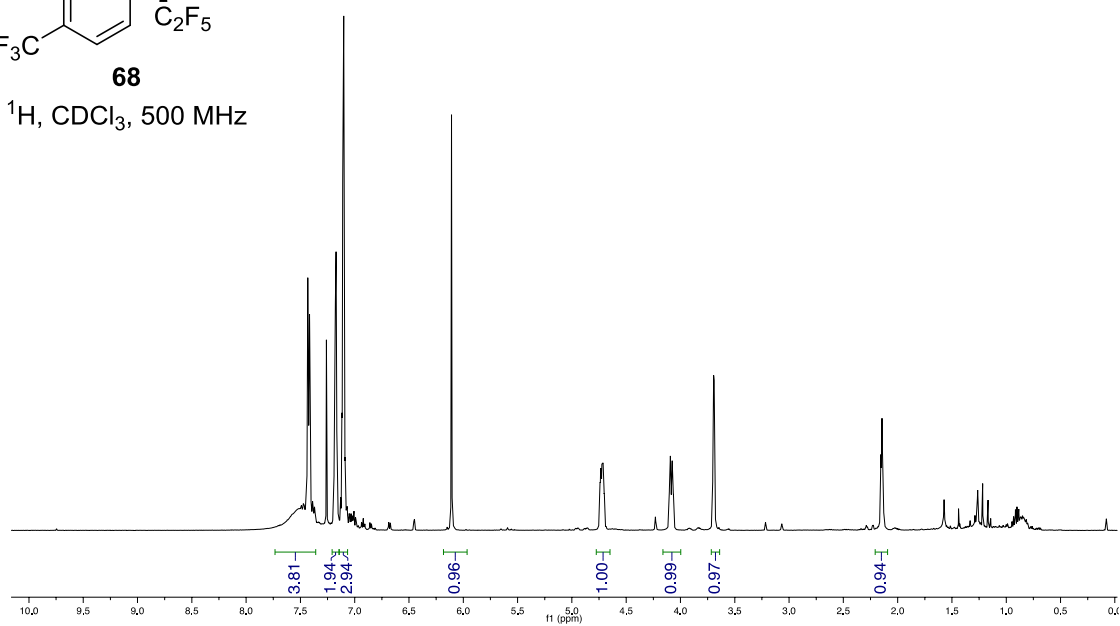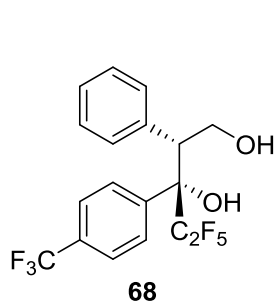

$^{13}\text{C}$ ,  $\text{CDCl}_3$ , 126 MHz

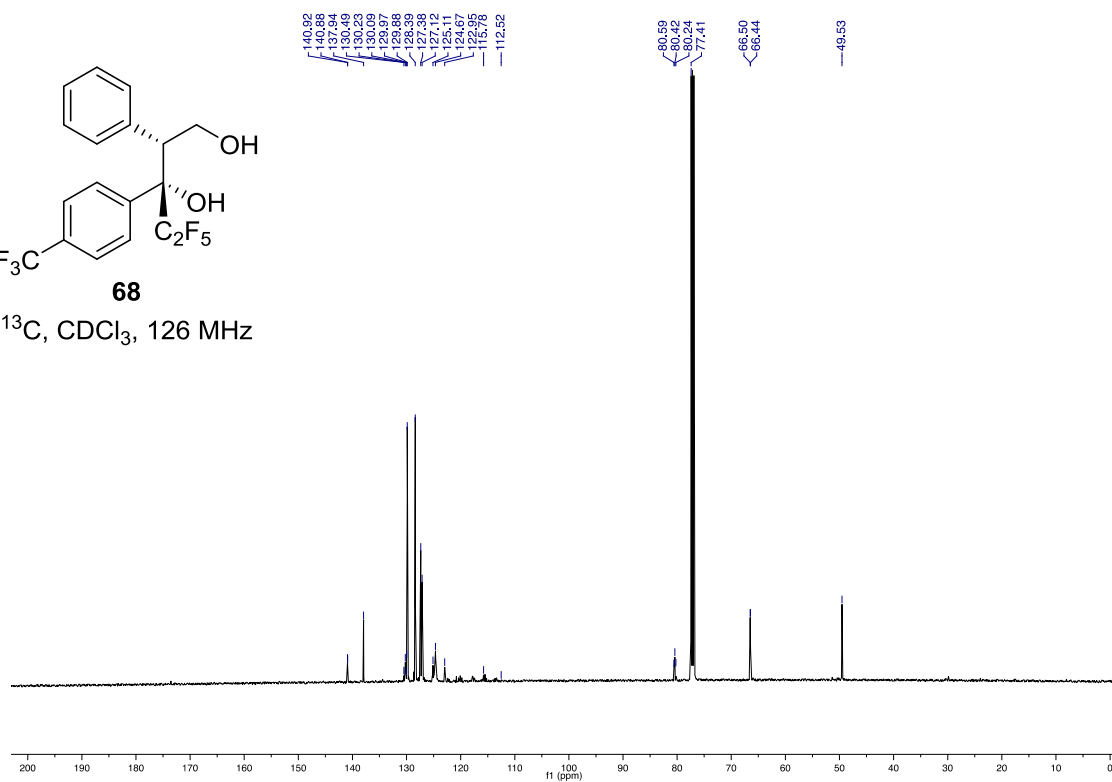

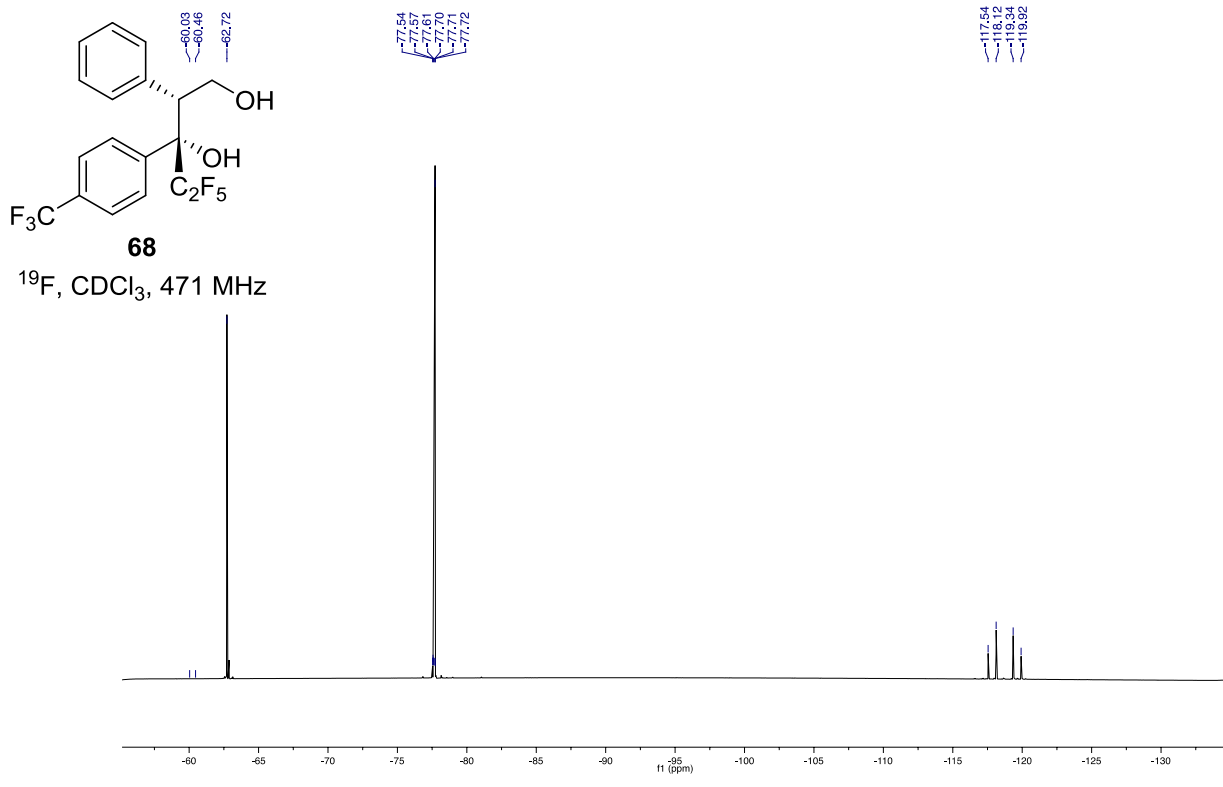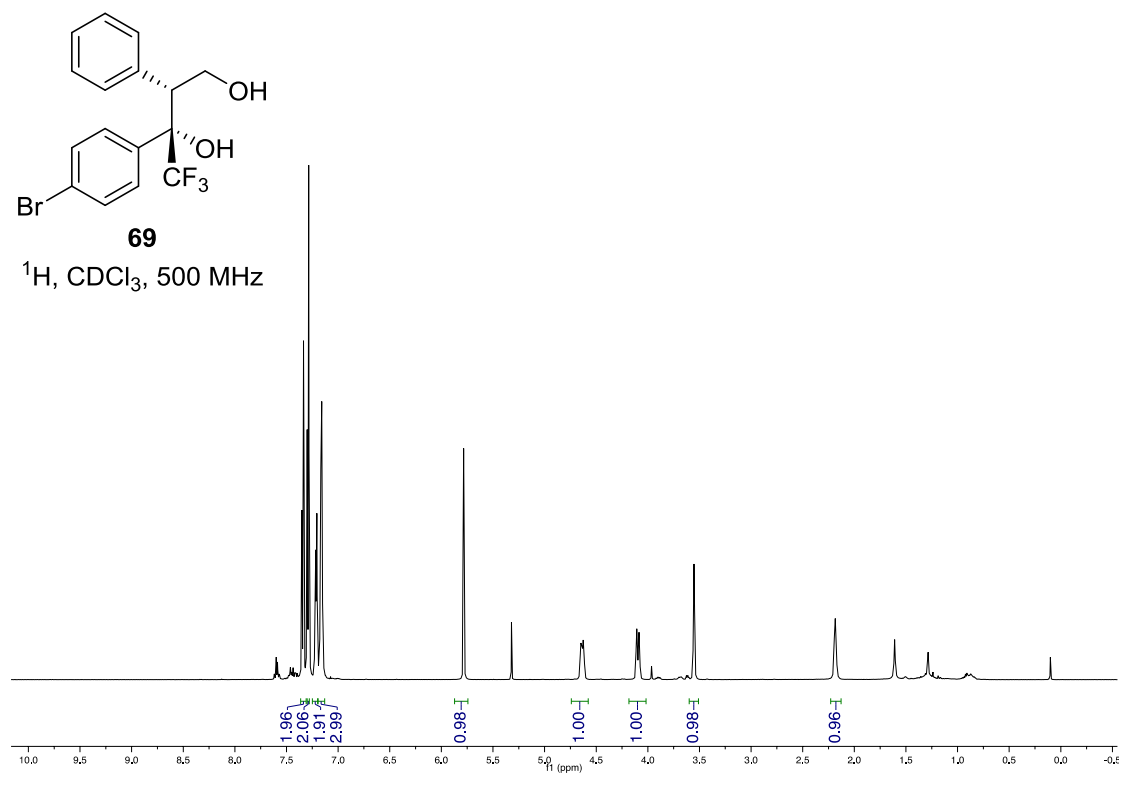

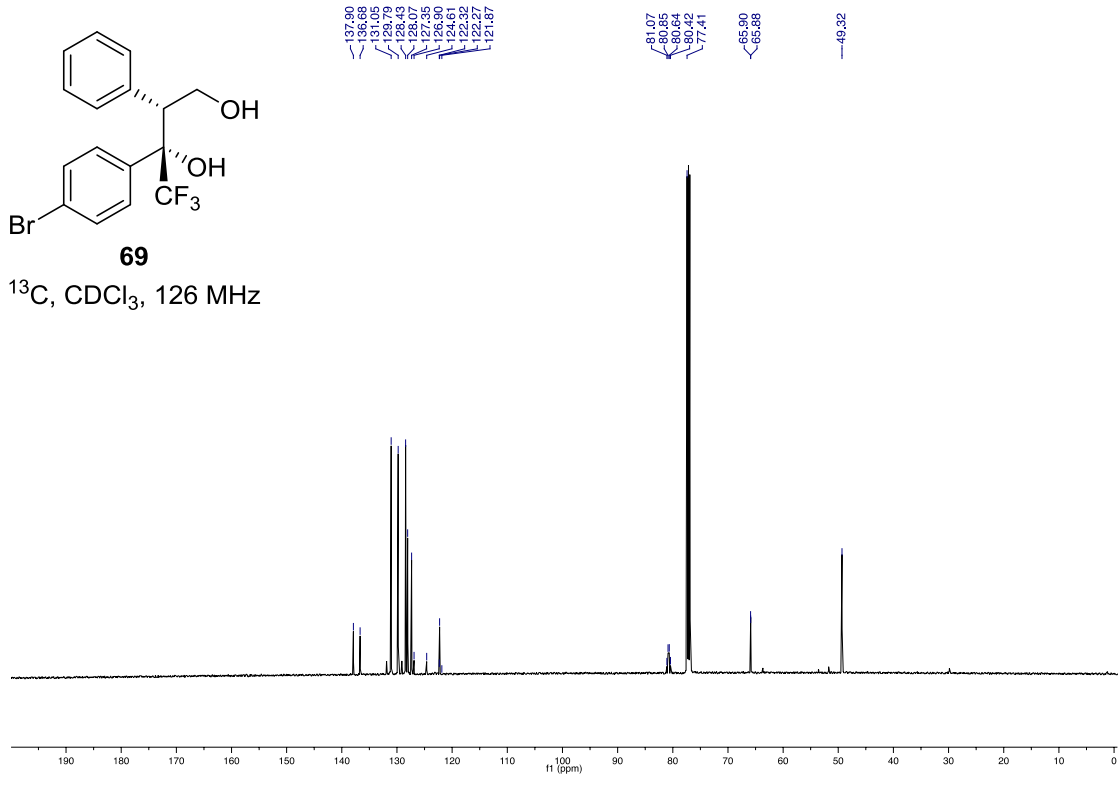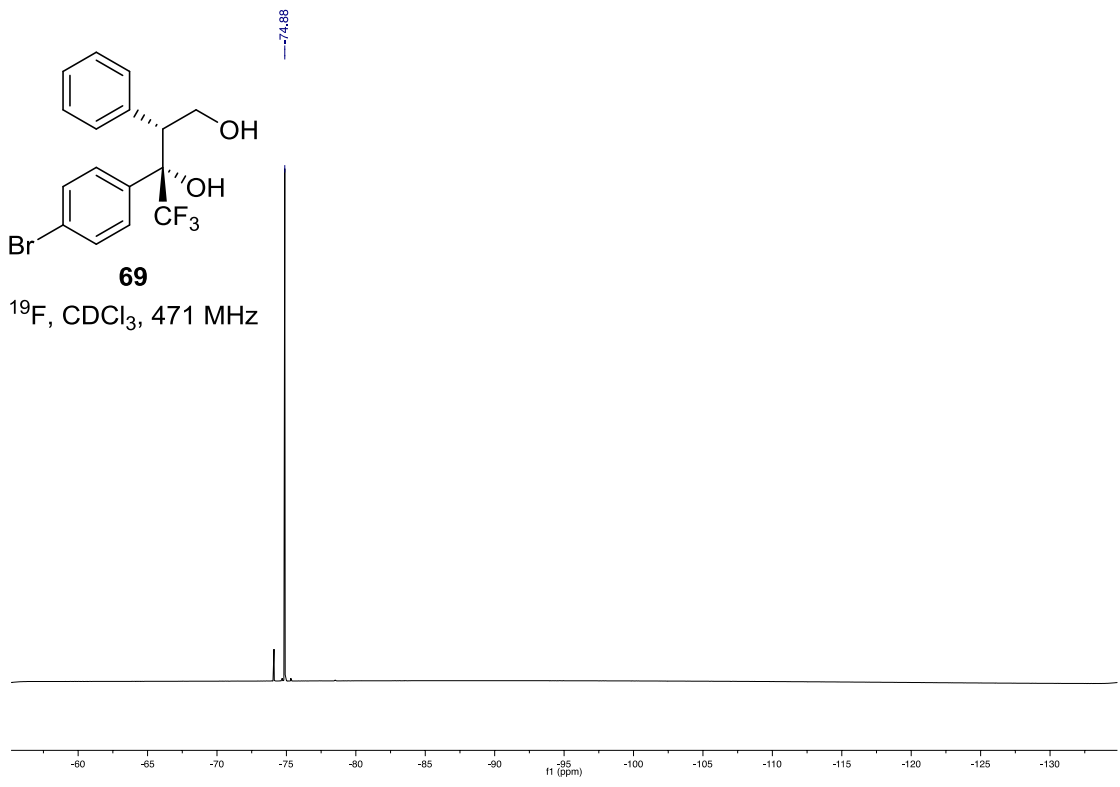



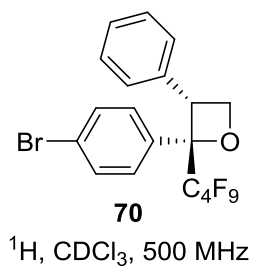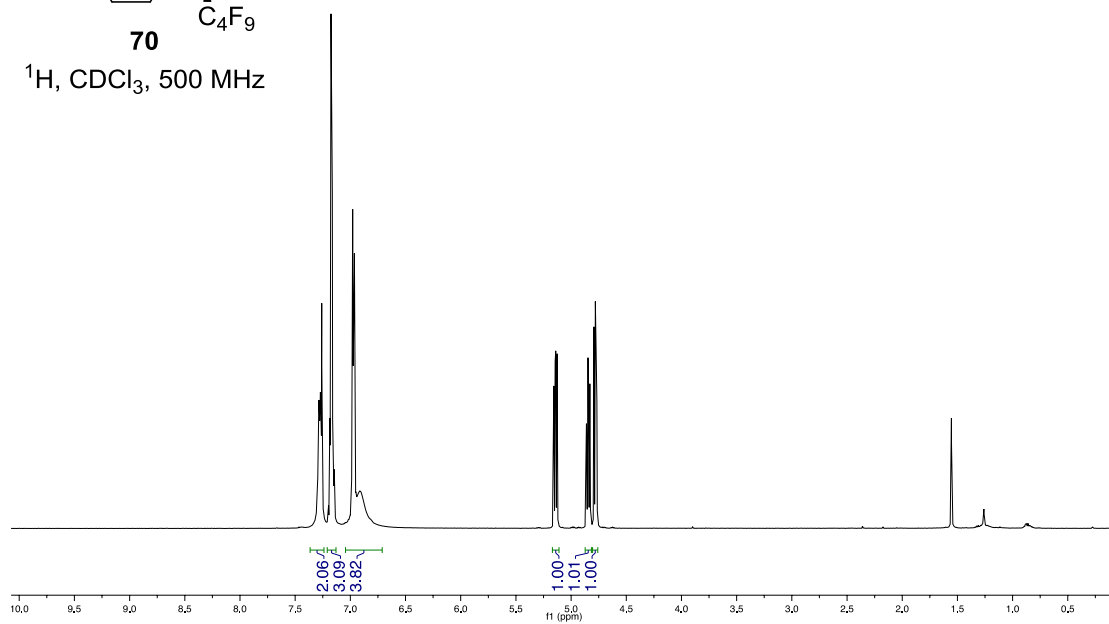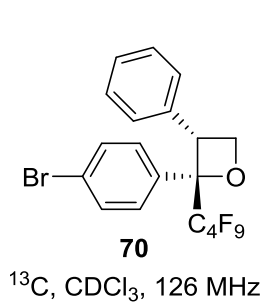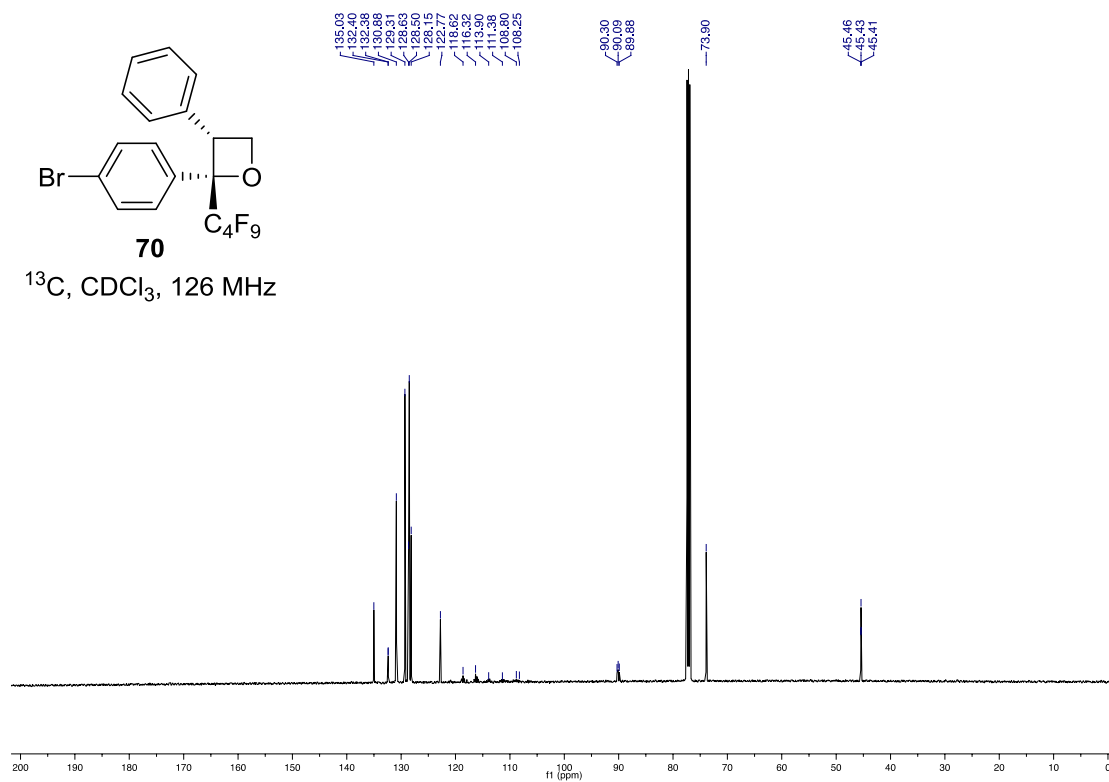

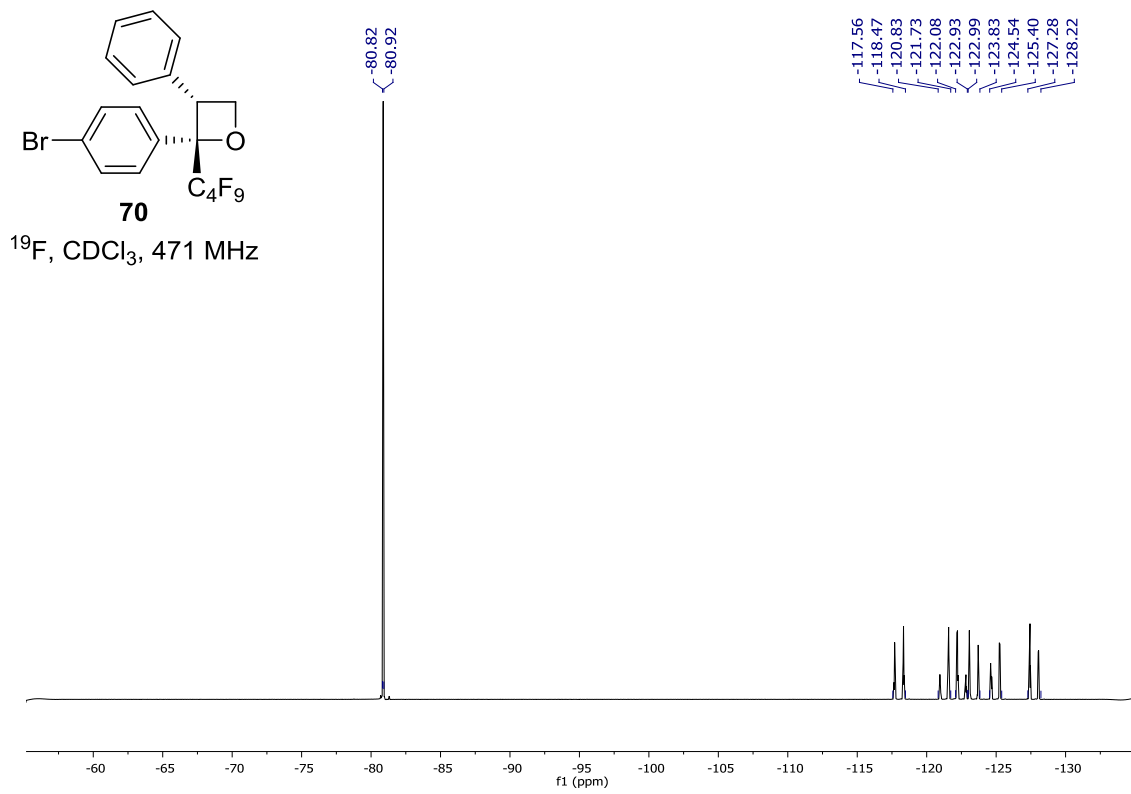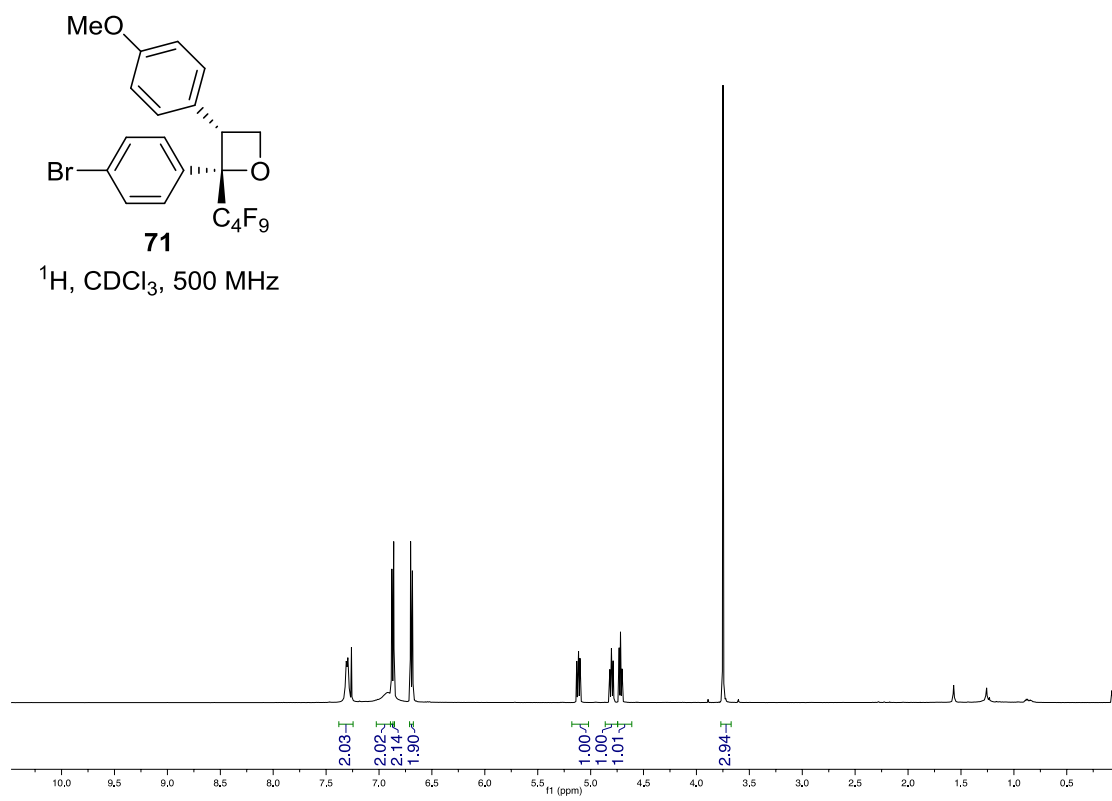

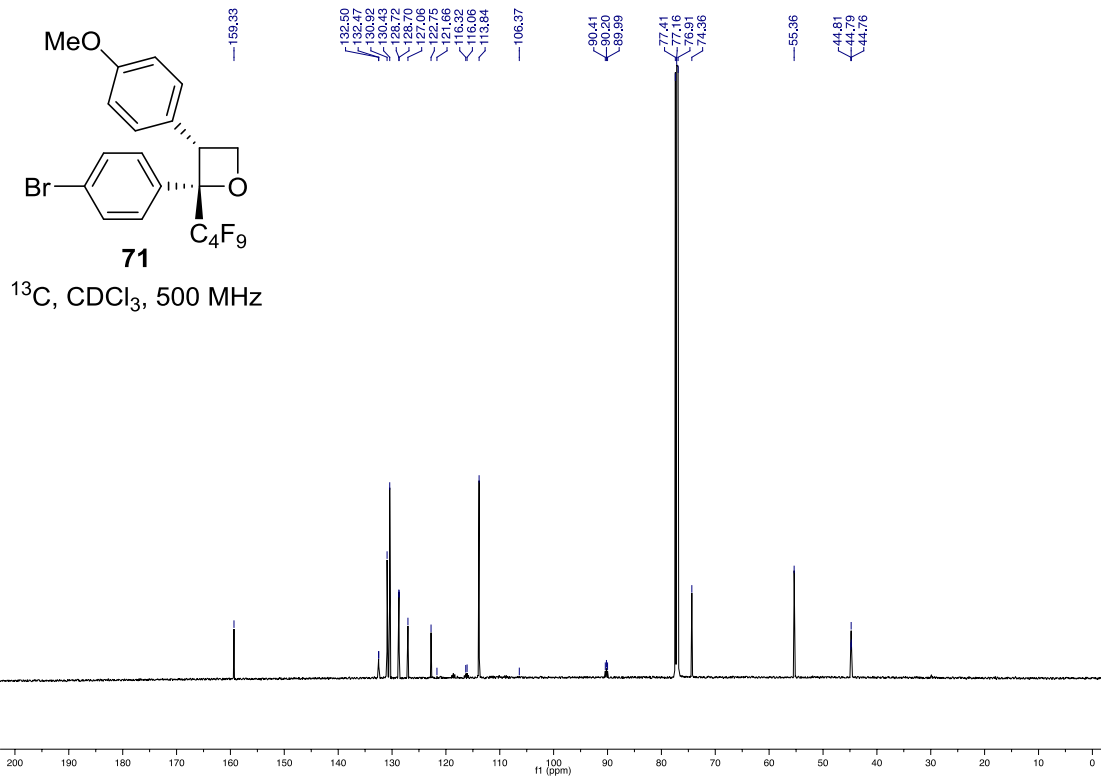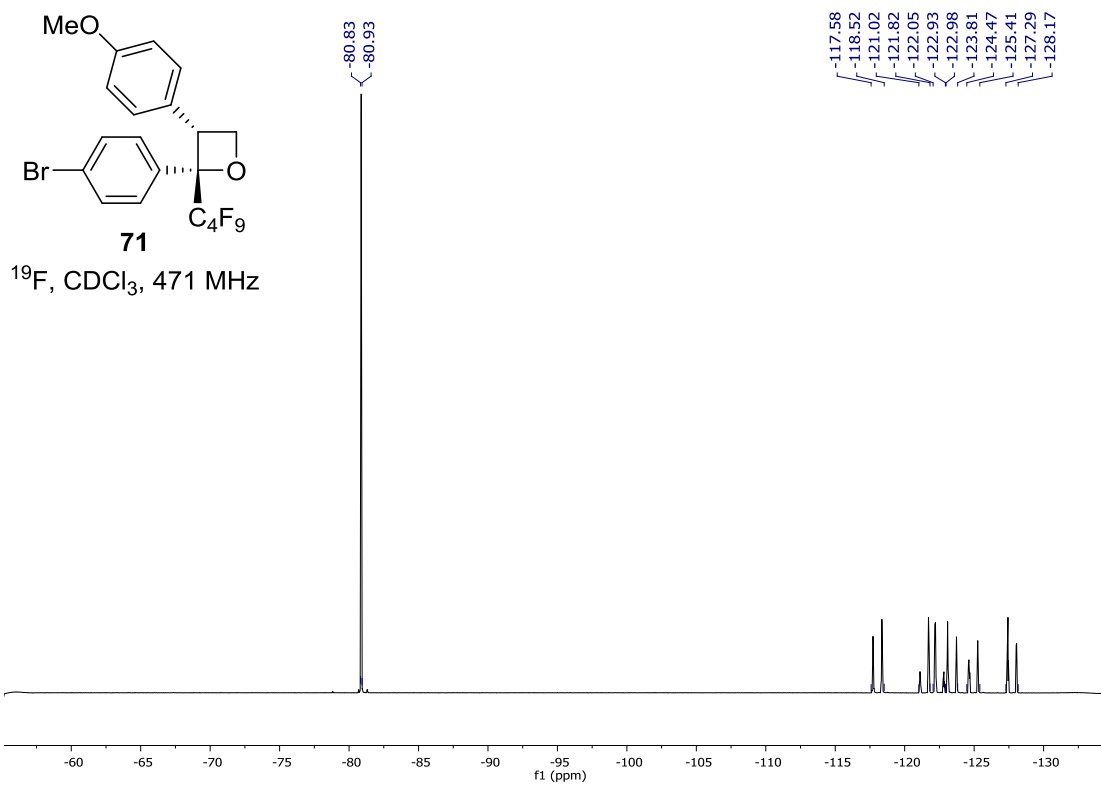

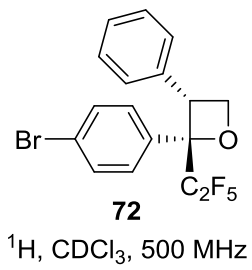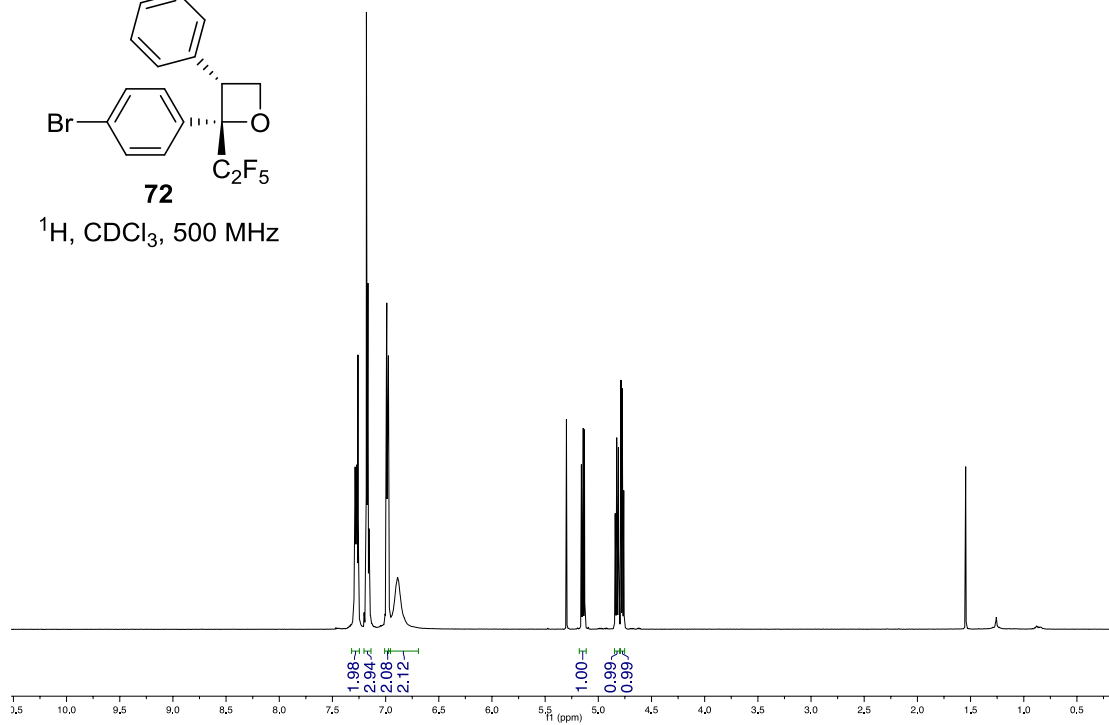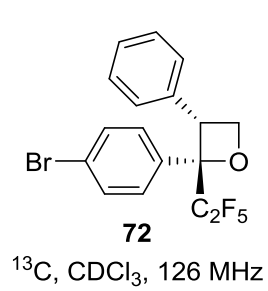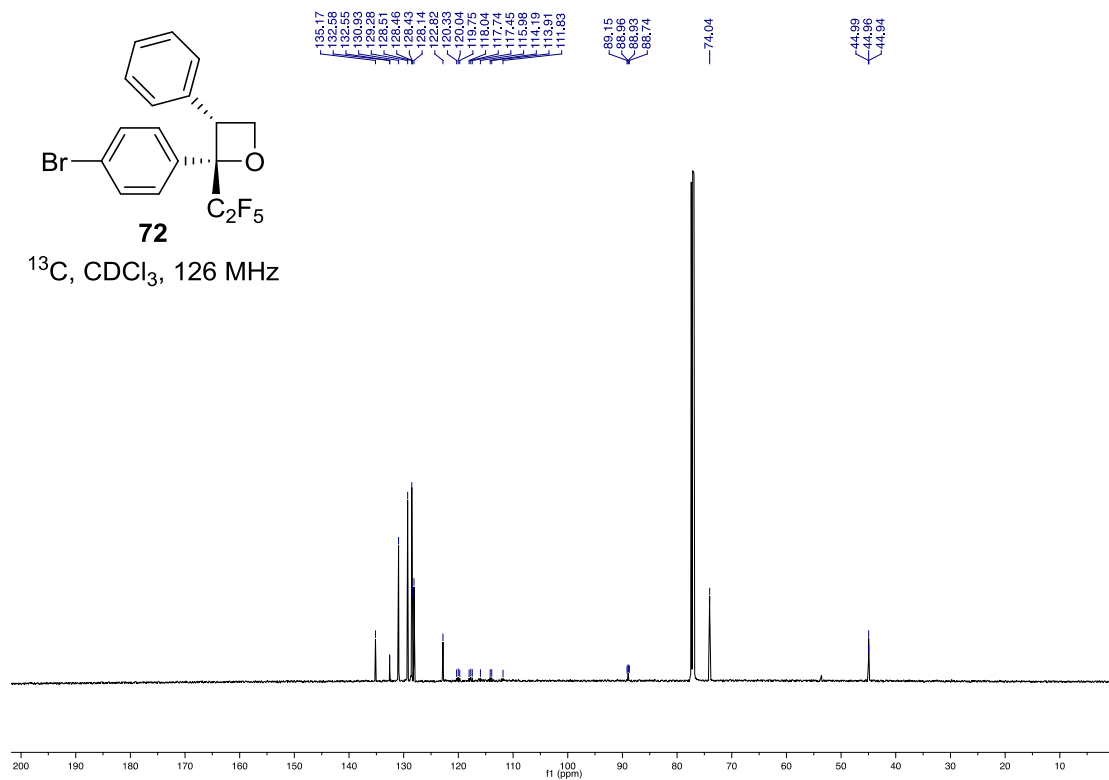

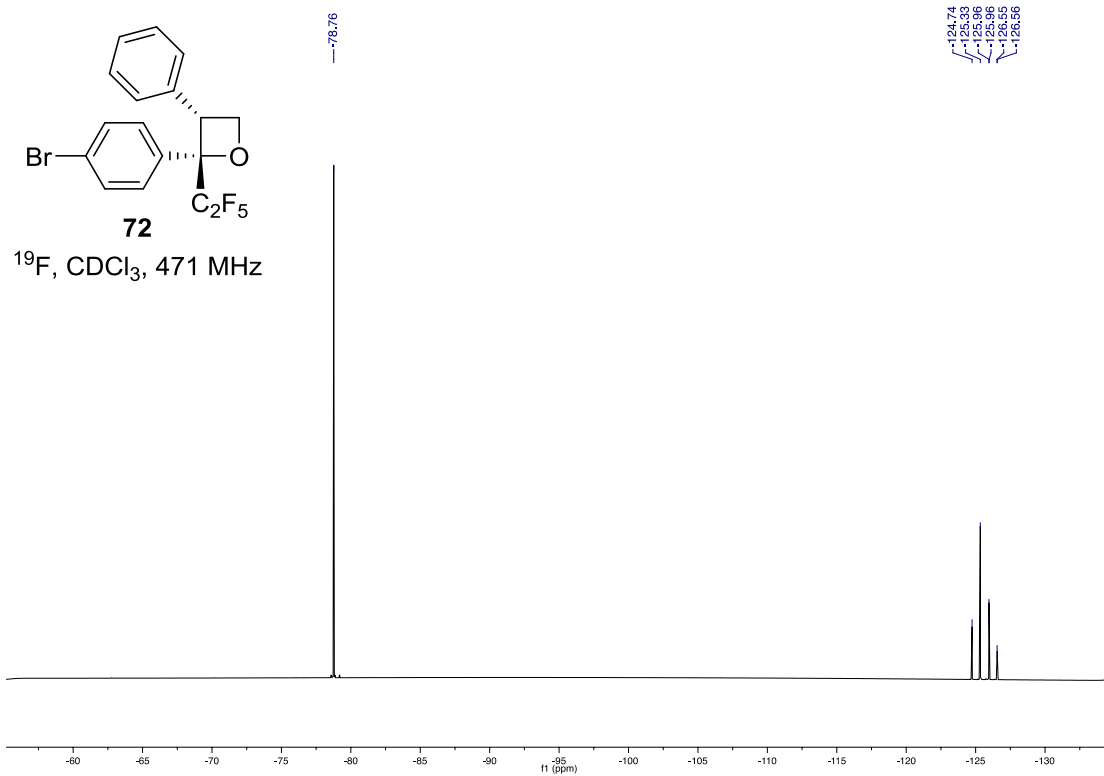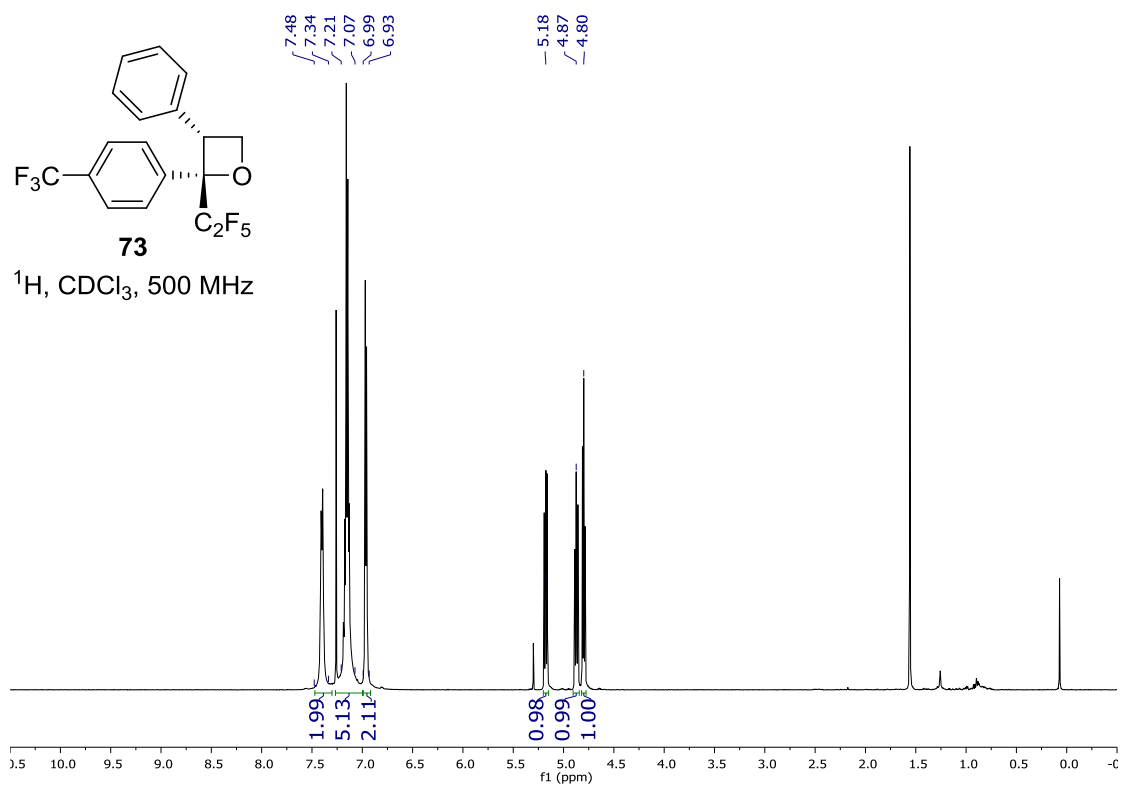

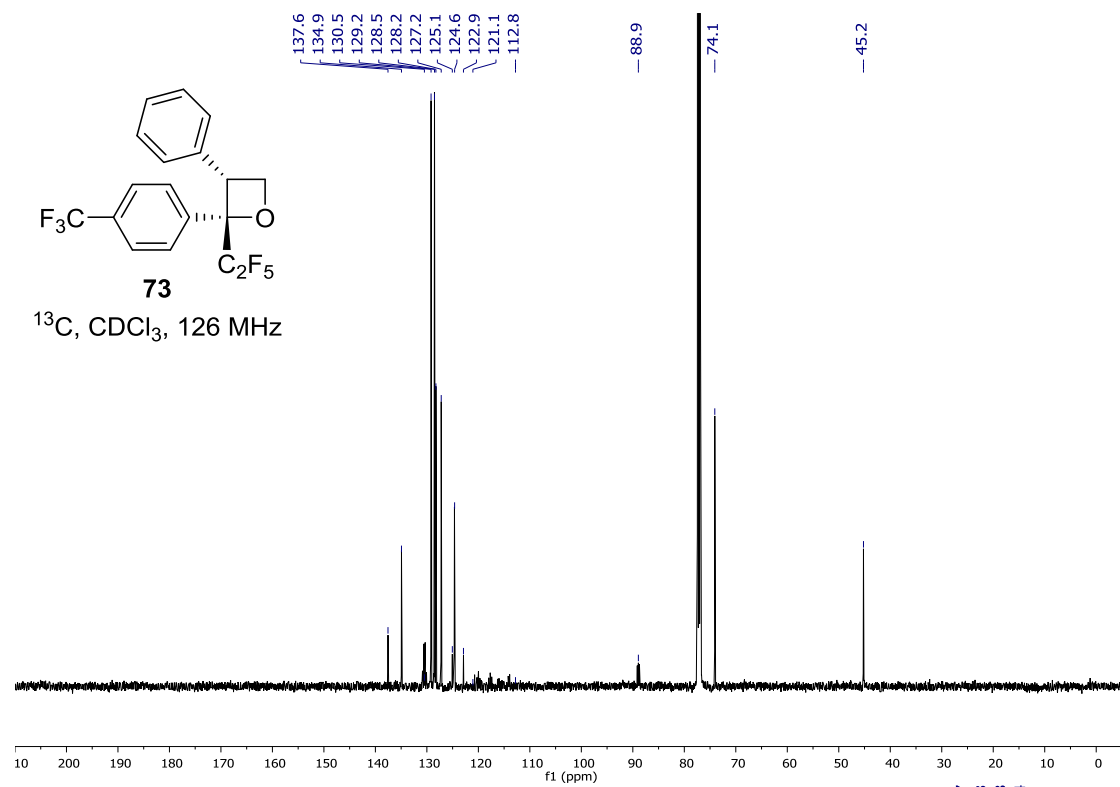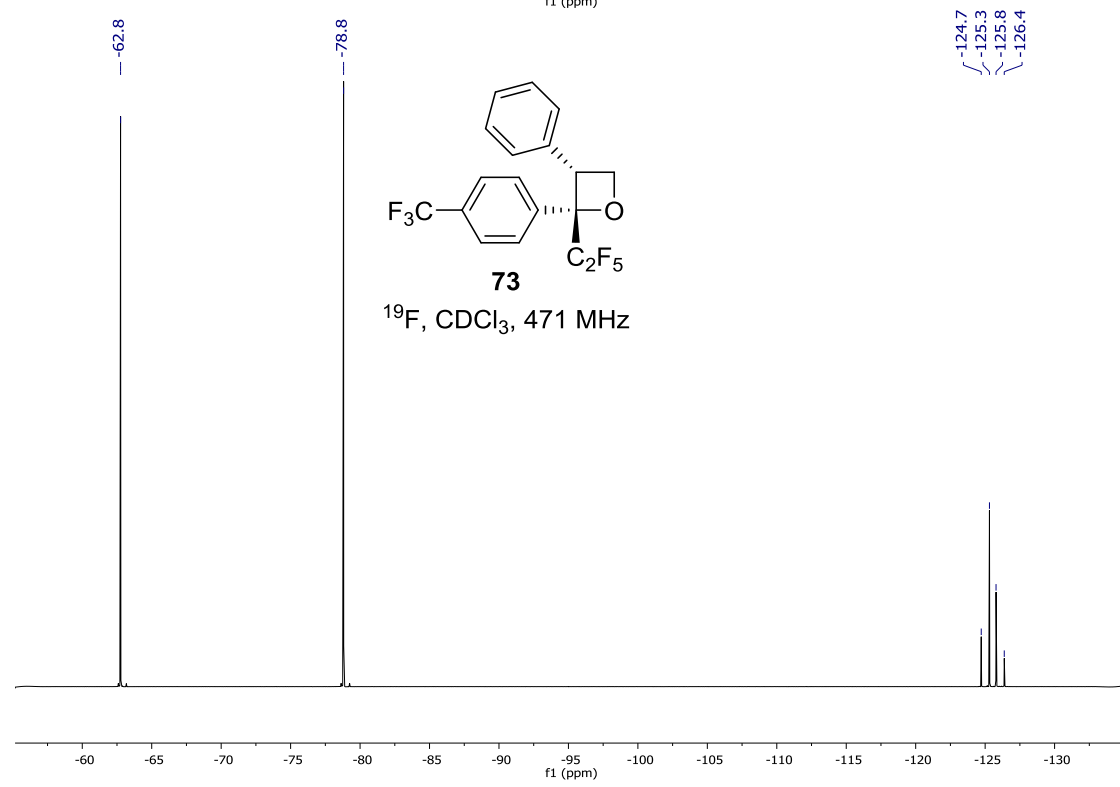

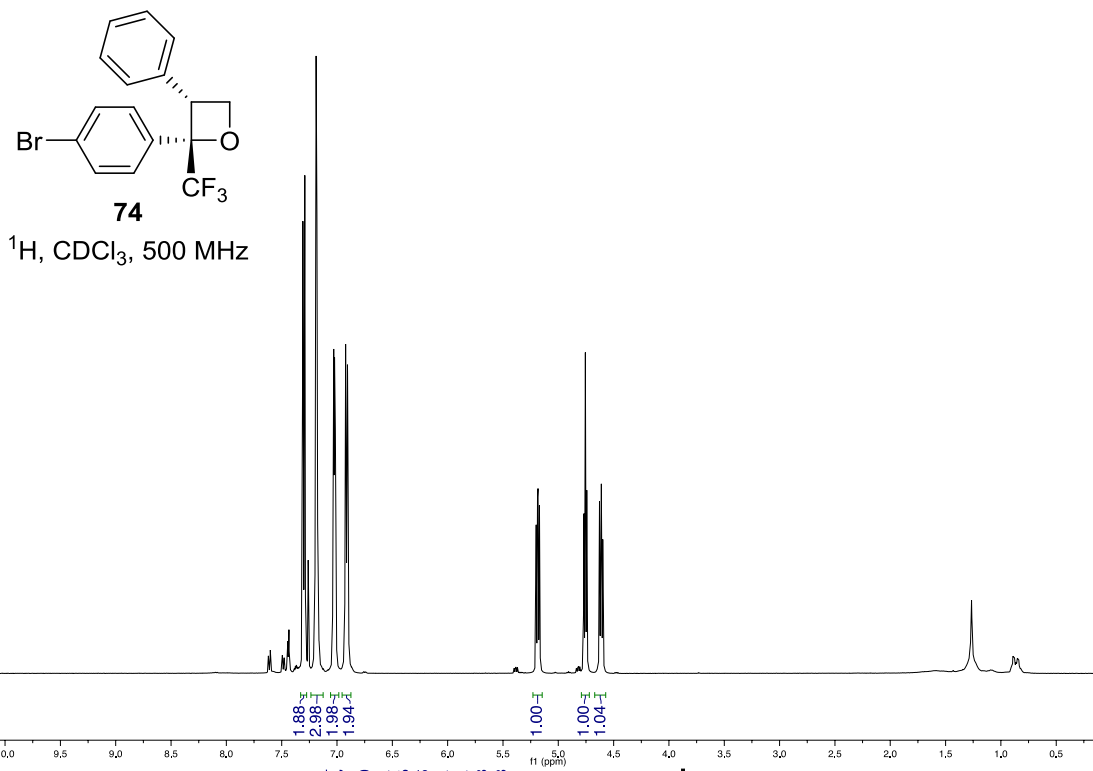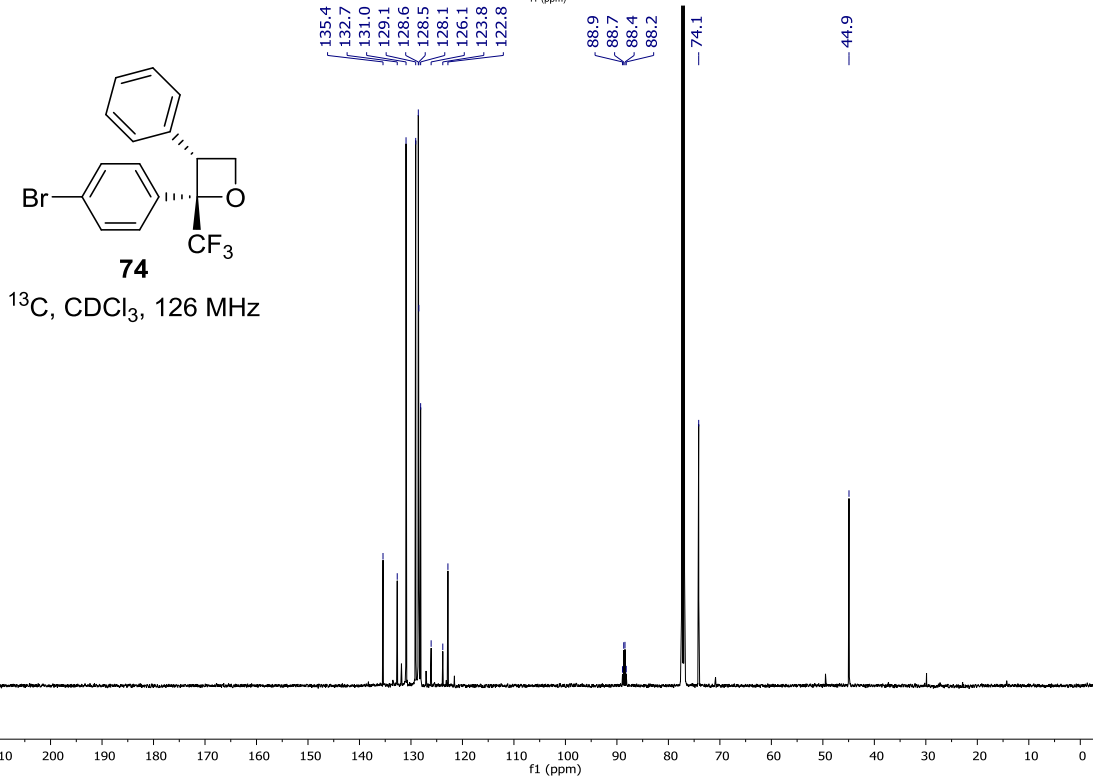

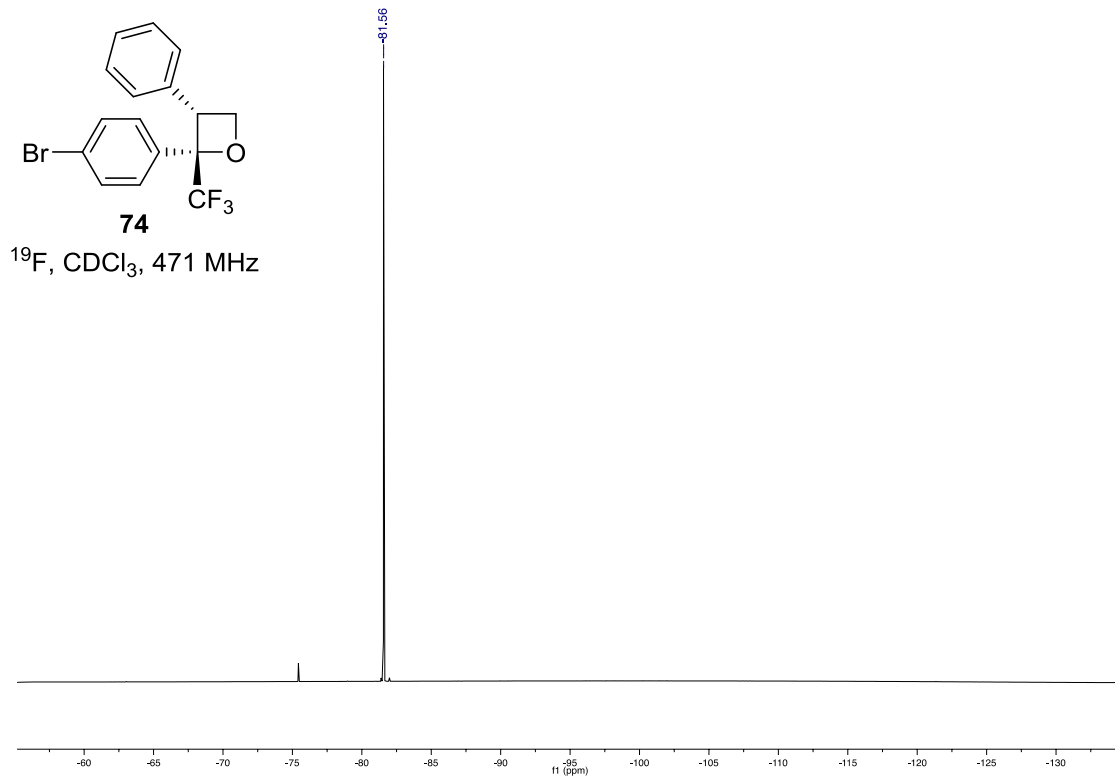



## HPLC Spectra

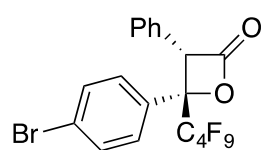

Chiralcel OD-H (97:3 hexane:IPA, flow rate 1.5 mLmin<sup>-1</sup>, 211 nm, 40 °C)  $t_R(3R,4R)$ : 2.8 min,  $t_R(3S,4S)$ : 3.4 min, 97:3 er.

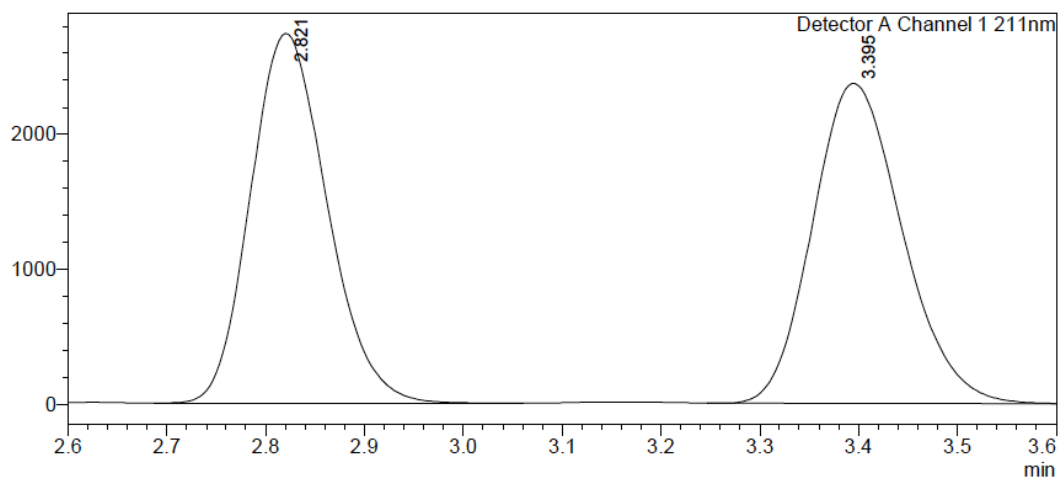

### <Peak Table>

| Detector A Channel 1 211nm |           |         |
|----------------------------|-----------|---------|
| Peak#                      | Ret. Time | Area%   |
| 1                          | 2.821     | 49.831  |
| 2                          | 3.395     | 50.169  |
| Total                      |           | 100.000 |

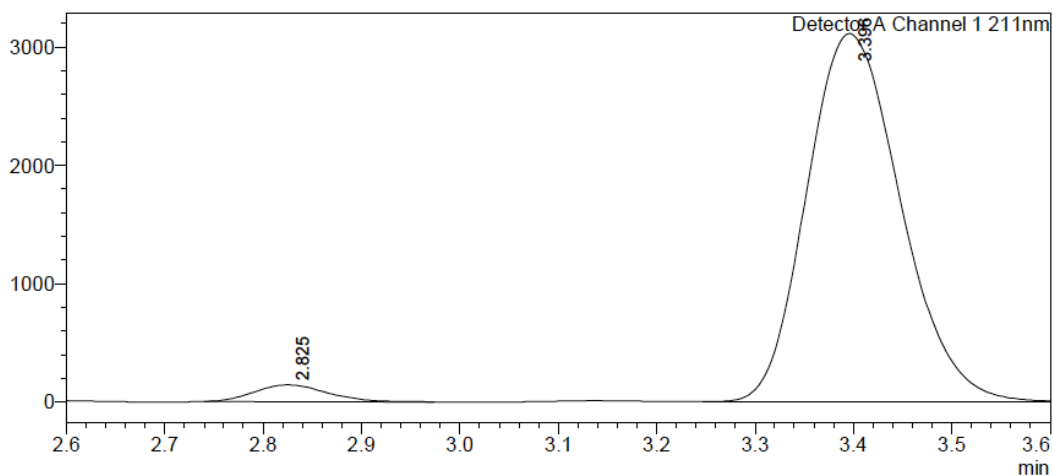

### <Peak Table>

| Detector A Channel 1 211nm |           |         |
|----------------------------|-----------|---------|
| Peak#                      | Ret. Time | Area%   |
| 1                          | 2.825     | 3.402   |
| 2                          | 3.396     | 96.598  |
| Total                      |           | 100.000 |

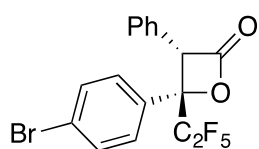

Chiralcel OD-H (97:3 Hexane:IPA, flow rate 1.5 mLmin<sup>-1</sup>, 211 nm, 40 °C)  $t_R(3R,4R)$ : 3.0 min,  $t_R(3S,4S)$ : 3.8 min, 97:3 er.

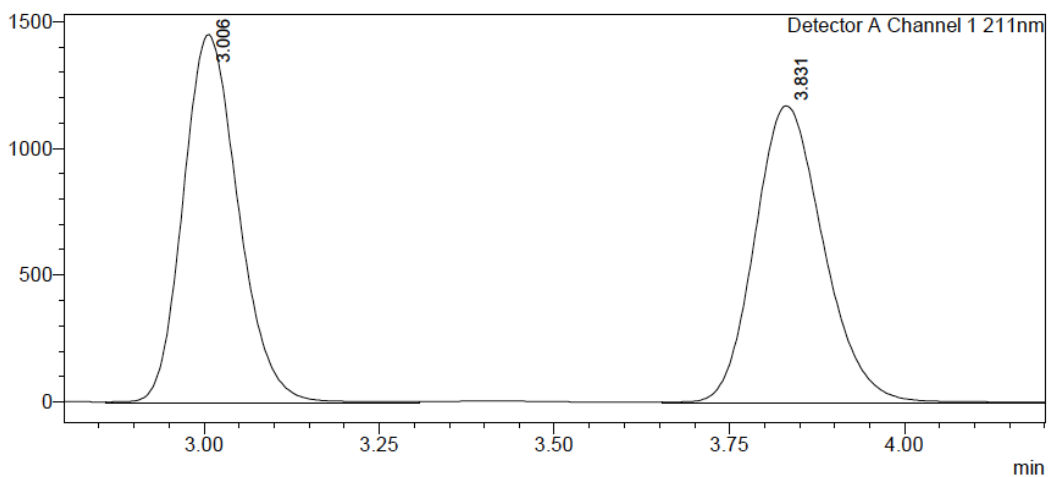

**<Peak Table>**

| Detector A Channel 1 211nm |           |         |
|----------------------------|-----------|---------|
| Peak#                      | Ret. Time | Area%   |
| 1                          | 3.006     | 49.349  |
| 2                          | 3.831     | 50.651  |
| Total                      |           | 100.000 |

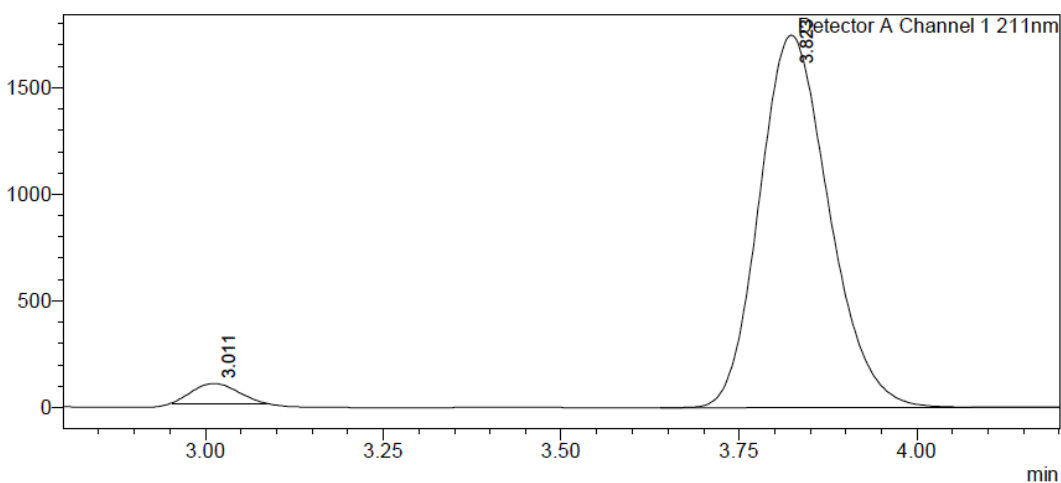

**<Peak Table>**

| Detector A Channel 1 211nm |           |         |
|----------------------------|-----------|---------|
| Peak#                      | Ret. Time | Area%   |
| 1                          | 3.011     | 3.282   |
| 2                          | 3.823     | 96.718  |
| Total                      |           | 100.000 |

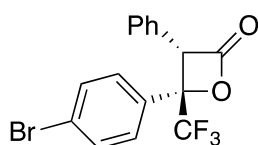

Chiralcel OD-H (97:3 Hexane:IPA, flow rate 1.5 mLmin<sup>-1</sup>, 211 nm, 40 °C)  $t_R(3R,4R)$ : 3.2 min,  $t_R(3S,4S)$ : 4.1 min, 95:5 er;

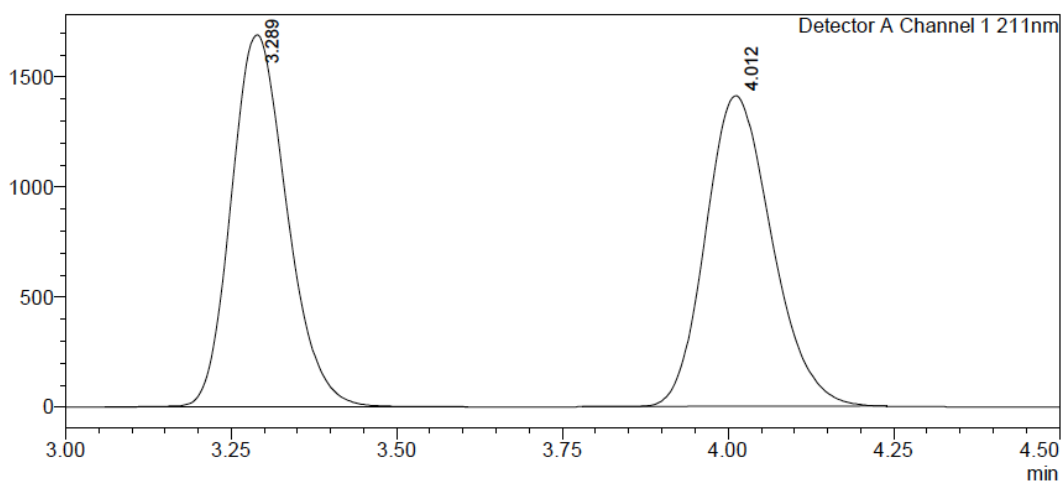

<Peak Table>

| Detector A Channel 1 211nm |           |         |
|----------------------------|-----------|---------|
| Peak#                      | Ret. Time | Area%   |
| 1                          | 3.289     | 50.096  |
| 2                          | 4.012     | 49.904  |
| Total                      |           | 100.000 |

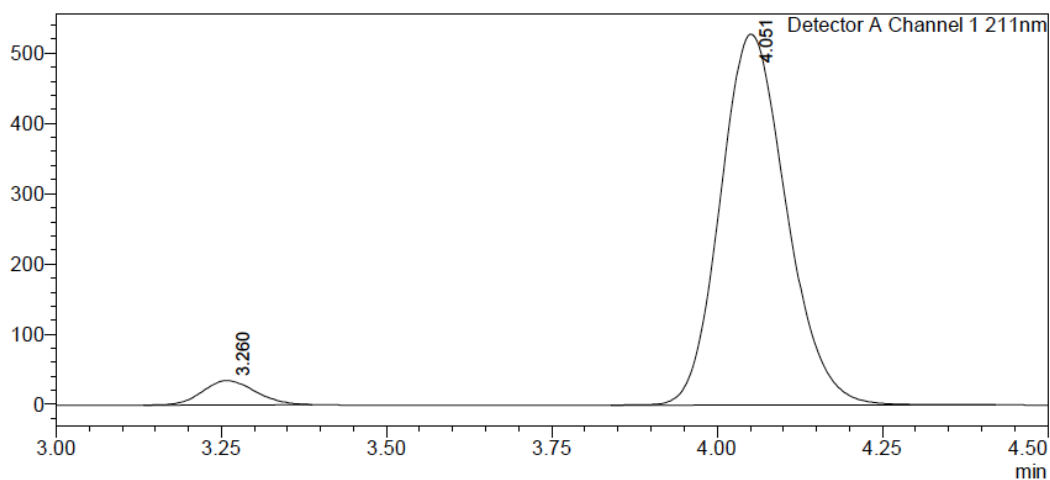

<Peak Table>

| Detector A Channel 1 211nm |           |         |
|----------------------------|-----------|---------|
| Peak#                      | Ret. Time | Area%   |
| 1                          | 3.260     | 4.940   |
| 2                          | 4.051     | 95.060  |
| Total                      |           | 100.000 |

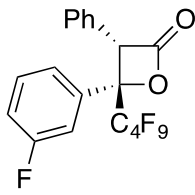

Chiralpak IC (99.9:0.1 Hexane:IPA, flow rate 1.0 mLmin<sup>-1</sup>, 211 nm, 30 °C)

$t_R(3R,4R)$ : 4.4 min,  $t_R(3S,4S)$ : 5.3 min, 96:4 er.

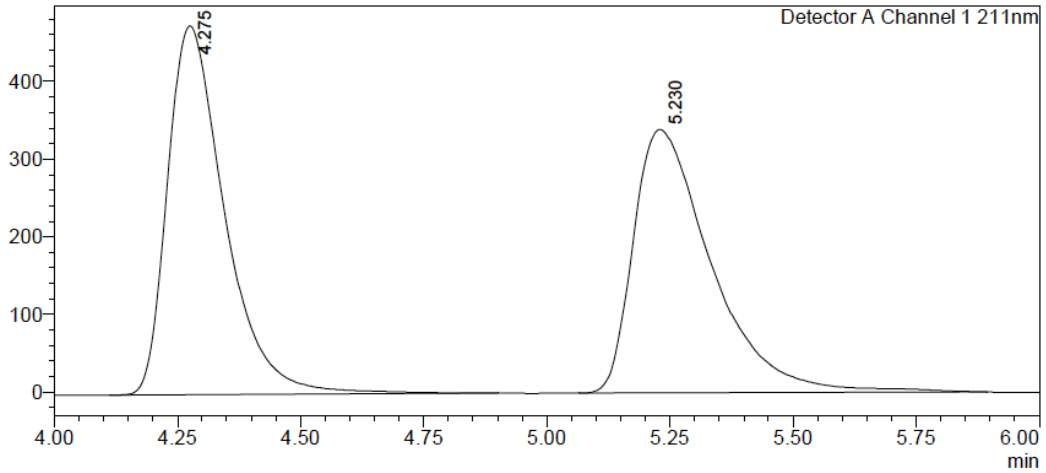

<Peak Table>

| Detector A Channel 1 211nm |           |         |
|----------------------------|-----------|---------|
| Peak#                      | Ret. Time | Area%   |
| 1                          | 4.275     | 50.575  |
| 2                          | 5.230     | 49.425  |
| Total                      |           | 100.000 |

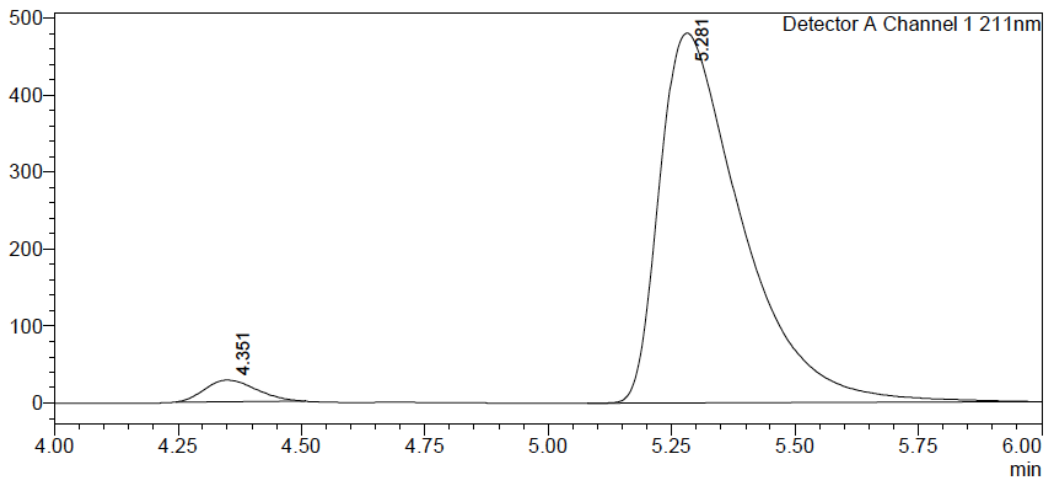

<Peak Table>

| Detector A Channel 1 211nm |           |         |
|----------------------------|-----------|---------|
| Peak#                      | Ret. Time | Area%   |
| 1                          | 4.351     | 3.515   |
| 2                          | 5.281     | 96.485  |
| Total                      |           | 100.000 |

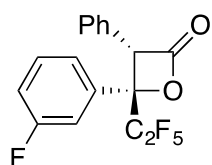

Chiralcel OD-H (99:1 Hexane:IPA, flow rate 1.5 mLmin<sup>-1</sup>, 211 nm, 40 °C)

$t_R(3R,4R)$ : 3.5 min,  $t_R(3S,4S)$ : 5.0 min, 95:5 er.

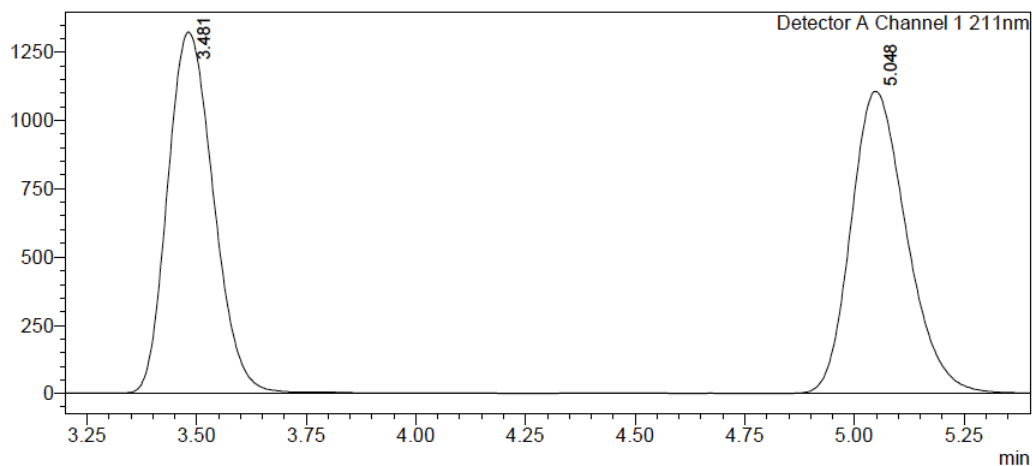

<Peak Table>

| Detector A Channel 1 211nm |           |         |
|----------------------------|-----------|---------|
| Peak#                      | Ret. Time | Area%   |
| 1                          | 3.481     | 49.887  |
| 2                          | 5.048     | 50.113  |
| Total                      |           | 100.000 |

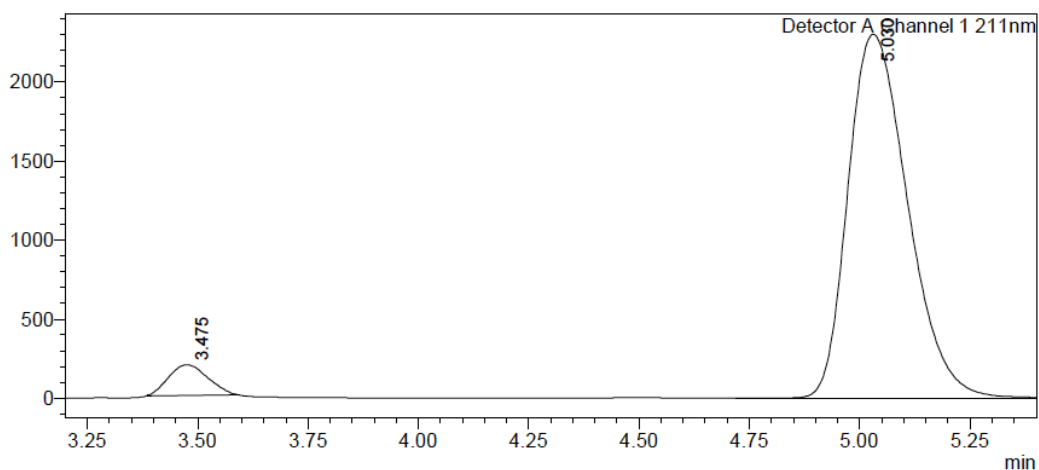

<Peak Table>

| Detector A Channel 1 211nm |           |         |
|----------------------------|-----------|---------|
| Peak#                      | Ret. Time | Area%   |
| 1                          | 3.475     | 5.226   |
| 2                          | 5.030     | 94.774  |
| Total                      |           | 100.000 |

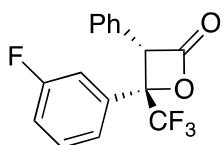

Chiralcel OD-H (97:3 Hexane:IPA, flow rate 1.5 mLmin<sup>-1</sup>, 211 nm, 40 °C)

$t_R(3R,4R)$ : 3.2 min,  $t_R(3S,4S)$ : 3.9 min, 97:3 er.

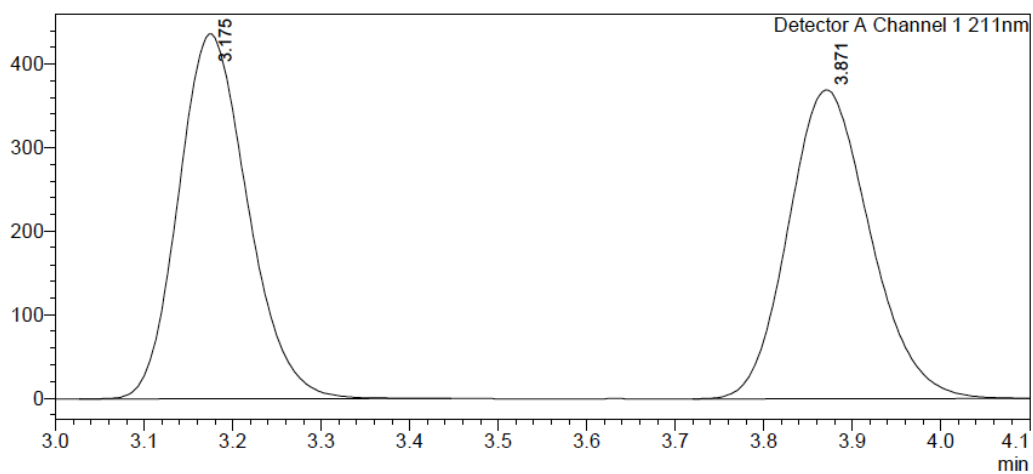

<Peak Table>

| Detector A Channel 1 211nm |           |         |
|----------------------------|-----------|---------|
| Peak#                      | Ret. Time | Area%   |
| 1                          | 3.175     | 49.965  |
| 2                          | 3.871     | 50.035  |
| Total                      |           | 100.000 |

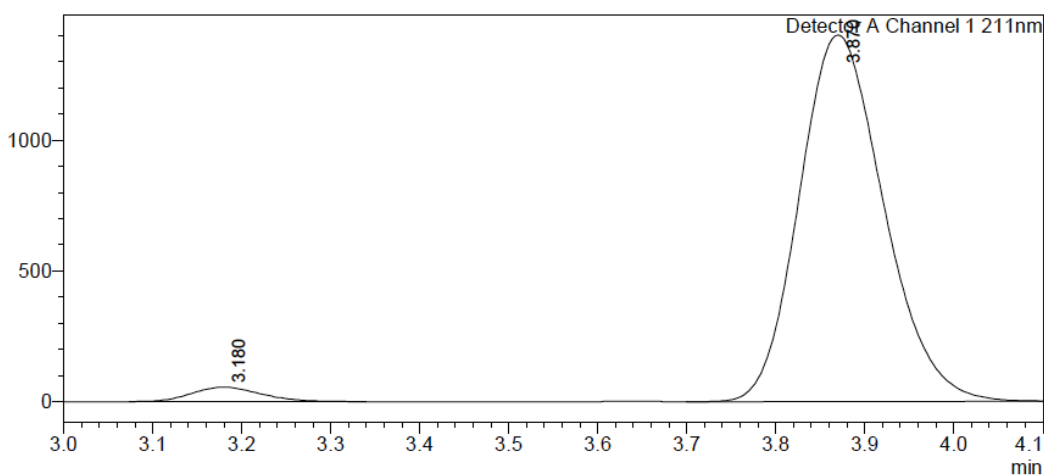

<Peak Table>

| Detector A Channel 1 211nm |           |         |
|----------------------------|-----------|---------|
| Peak#                      | Ret. Time | Area%   |
| 1                          | 3.180     | 3.138   |
| 2                          | 3.870     | 96.862  |
| Total                      |           | 100.000 |

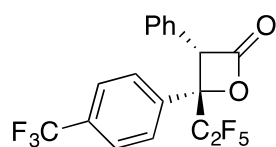

Chiralcel OD-H (97:3 Hexane:IPA, flow rate 1.5 mLmin<sup>-1</sup>, 211 nm, 40 °C)  $t_R(3R,4R)$ : 2.8 min,  $t_R(3S,4S)$ : 3.8 min, 94:6 er.

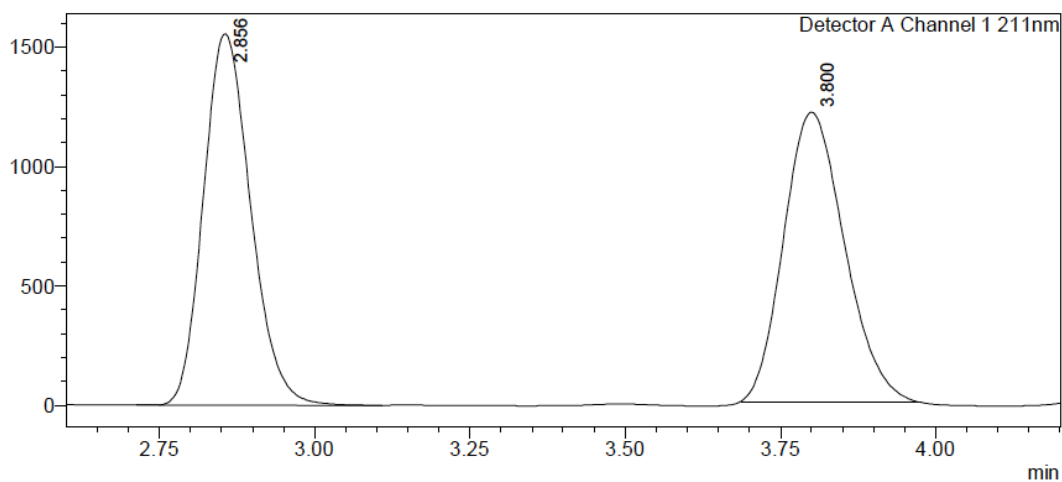

<Peak Table>

| Detector A Channel 1 211nm |           |         |
|----------------------------|-----------|---------|
| Peak#                      | Ret. Time | Area%   |
| 1                          | 2.856     | 49.930  |
| 2                          | 3.800     | 50.070  |
| Total                      |           | 100.000 |

mV

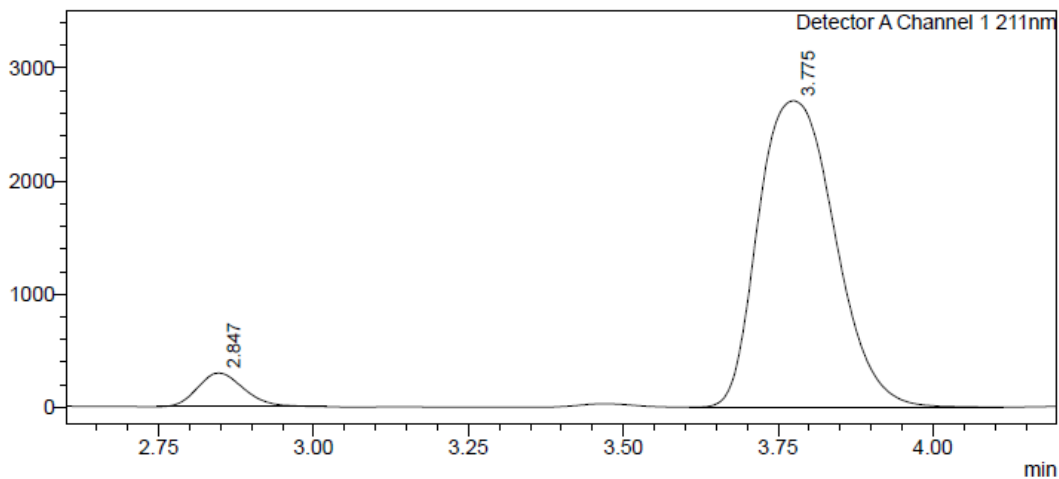

<Peak Table>

| Detector A Channel 1 211nm |           |         |
|----------------------------|-----------|---------|
| Peak#                      | Ret. Time | Area%   |
| 1                          | 2.847     | 6.331   |
| 2                          | 3.775     | 93.669  |
| Total                      |           | 100.000 |

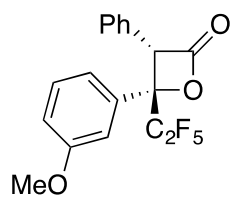

Chiralcel OD-H (97:3 Hexane:IPA, flow rate 1.5 mLmin<sup>-1</sup>, 211 nm, 40 °C)

$t_R(3R,4R)$ : 3.1 min,  $t_R(3S,4S)$ : 3.7 min, 88:12 er.

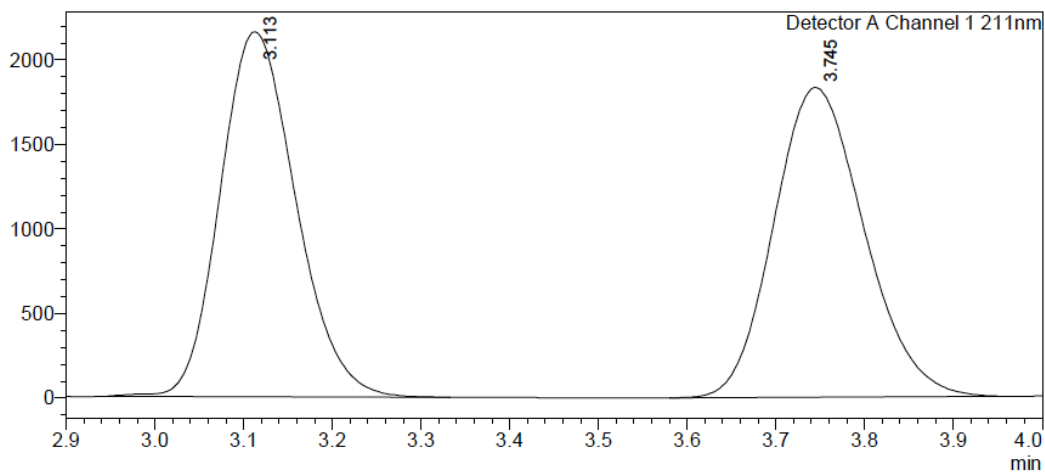

<Peak Table>

| Detector A Channel 1 211nm |           |         |
|----------------------------|-----------|---------|
| Peak#                      | Ret. Time | Area%   |
| 1                          | 3.113     | 49.726  |
| 2                          | 3.745     | 50.274  |
| Total                      |           | 100.000 |

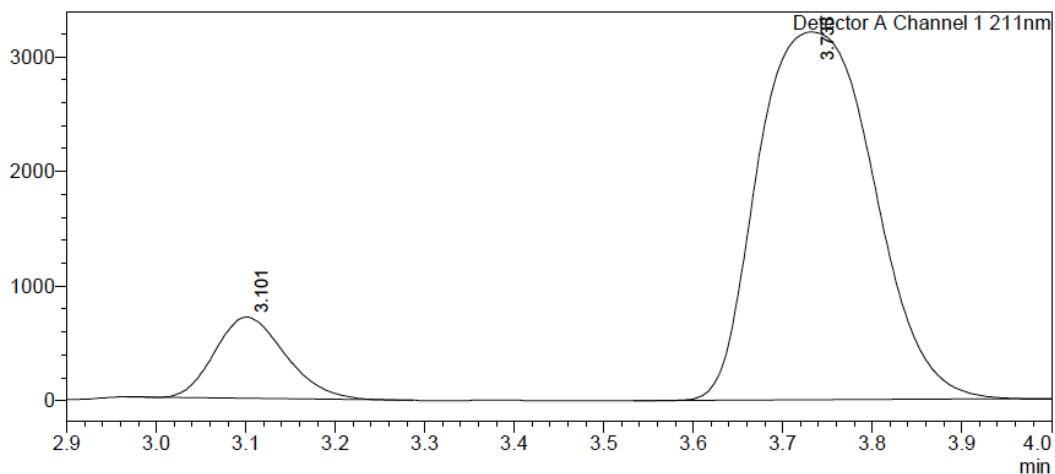

<Peak Table>

| Detector A Channel 1 211nm |           |         |
|----------------------------|-----------|---------|
| Peak#                      | Ret. Time | Area%   |
| 1                          | 3.101     | 11.886  |
| 2                          | 3.733     | 88.114  |
| Total                      |           | 100.000 |



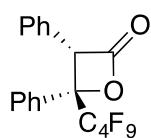

Chiralpak IC (99.9:0.1 Hexane:IPA, flow rate 1 mLmin<sup>-1</sup>, 211 nm, 30 °C)

$t_R(3R,4R)$ : 3.3 min,  $t_R(3S,4S)$ : 3.9 min, 98:2 er.

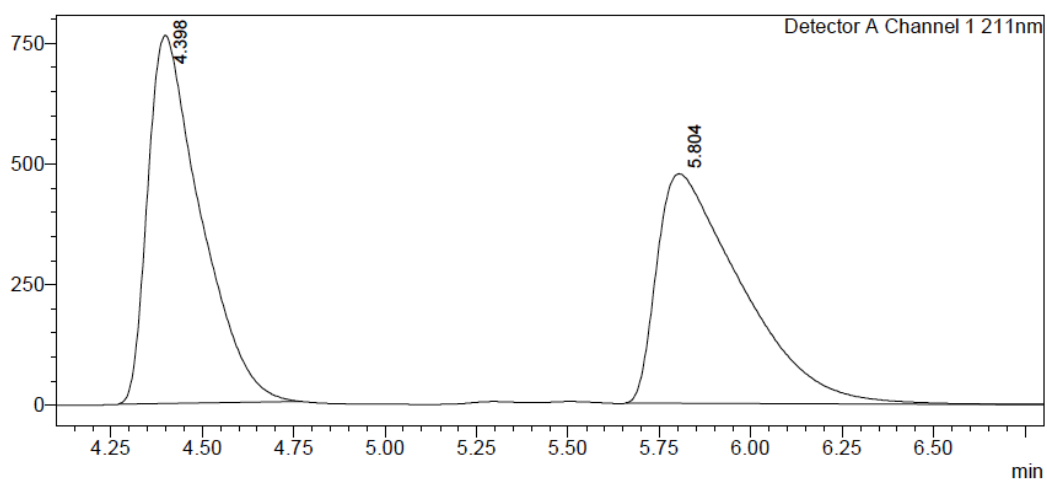

**<Peak Table>**

Detector A Channel 1 211nm

| Peak# | Ret. Time | Area%   |
|-------|-----------|---------|
| 1     | 4.398     | 50.103  |
| 2     | 5.804     | 49.897  |
| Total |           | 100.000 |

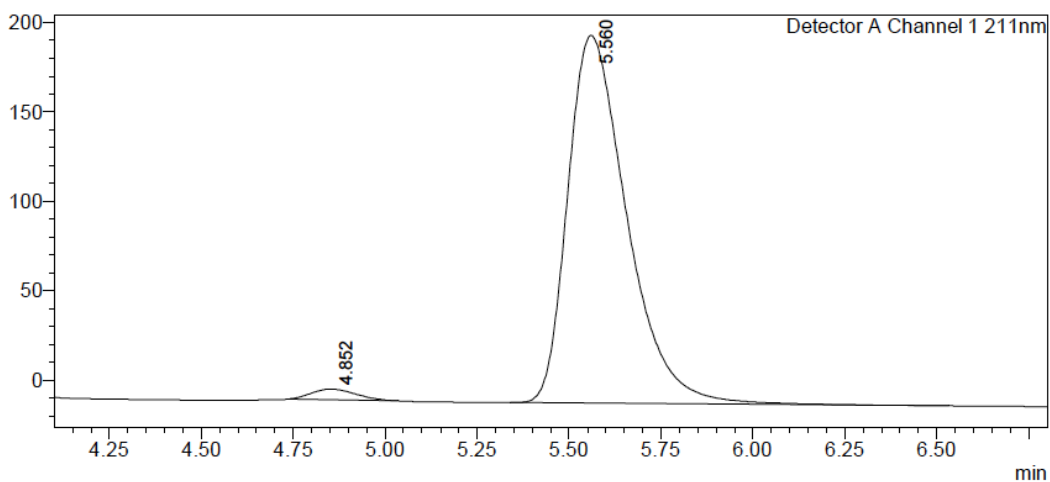

**<Peak Table>**

Detector A Channel 1 211nm

| Peak# | Ret. Time | Area%   |
|-------|-----------|---------|
| 1     | 4.852     | 2.114   |
| 2     | 5.560     | 97.886  |
| Total |           | 100.000 |

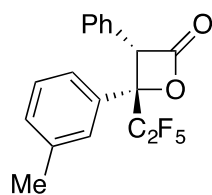

Chiral HPLC analysis, Chiralcel OD-H (99.5:0.5 Hexane : IPA, flow rate 1.5 mLmin<sup>-1</sup>, 211 nm, 40°C)  $t_R(3R,4R)$ : 3.5 min,  $t_R(3S,4S)$ : 4.9 min, 92:8 er.

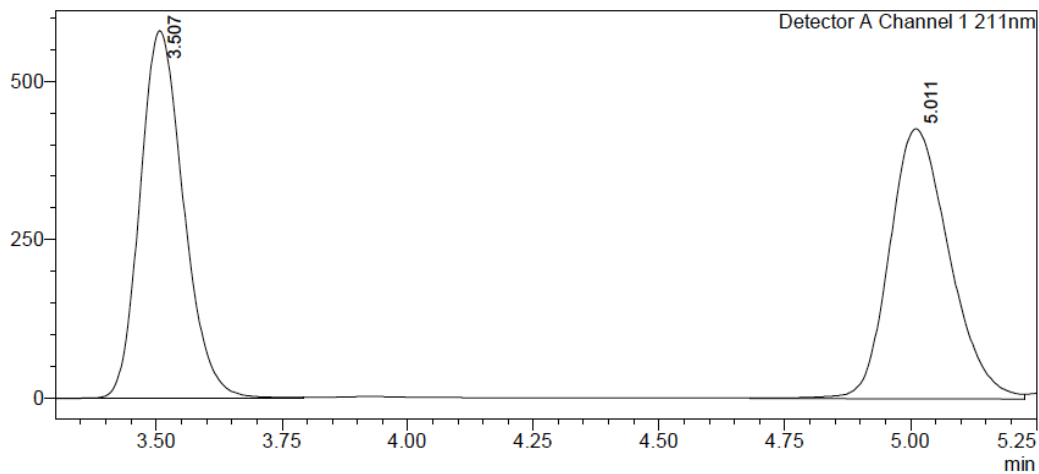

**<Peak Table>**

Detector A Channel 1 211nm

| Peak# | Ret. Time | Area%   |
|-------|-----------|---------|
| 1     | 3.507     | 49.874  |
| 2     | 5.011     | 50.126  |
| Total |           | 100.000 |

mV

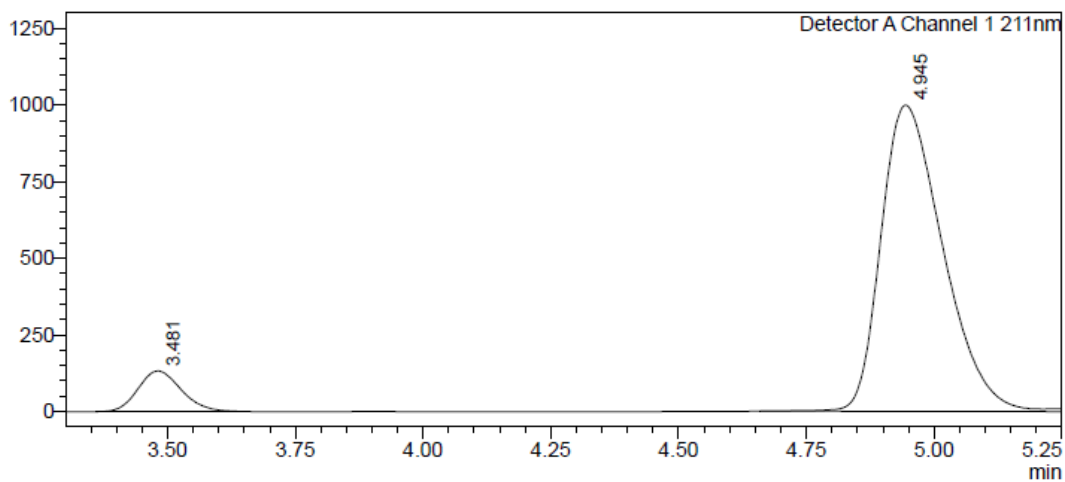

**<Peak Table>**

Detector A Channel 1 211nm

| Peak# | Ret. Time | Area%   |
|-------|-----------|---------|
| 1     | 3.481     | 8.392   |
| 2     | 4.945     | 91.608  |
| Total |           | 100.000 |

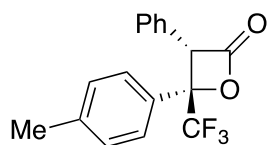

Chiralcel OD-H (97:3 Hexane:IPA, flow rate 1.5 mLmin<sup>-1</sup>, 211 nm, 40 °C)  $t_R(3R,4R)$ : 3.0 min,  $t_R(3S,4S)$ : 3.4 min, 99:1 er.

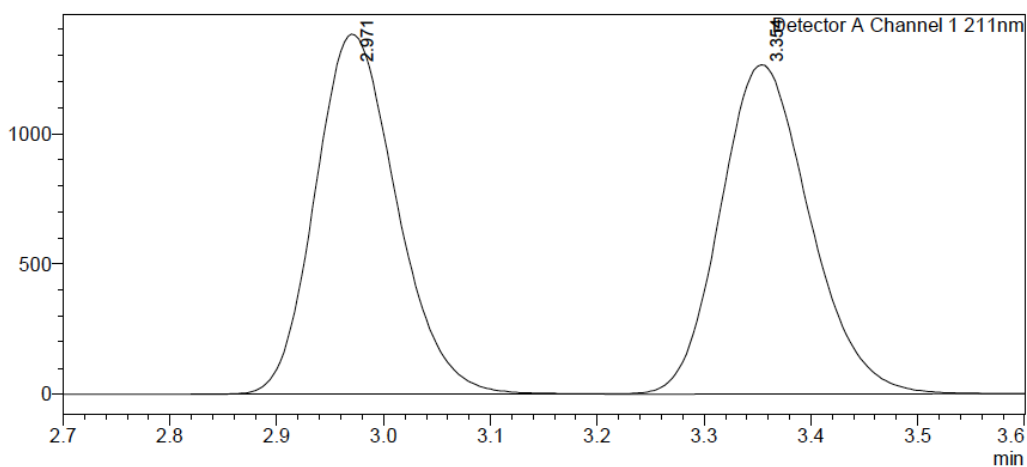

<Peak Table>

| Detector A Channel 1 211nm |           |         |
|----------------------------|-----------|---------|
| Peak#                      | Ret. Time | Area%   |
| 1                          | 2.971     | 49.825  |
| 2                          | 3.354     | 50.175  |
| Total                      |           | 100.000 |

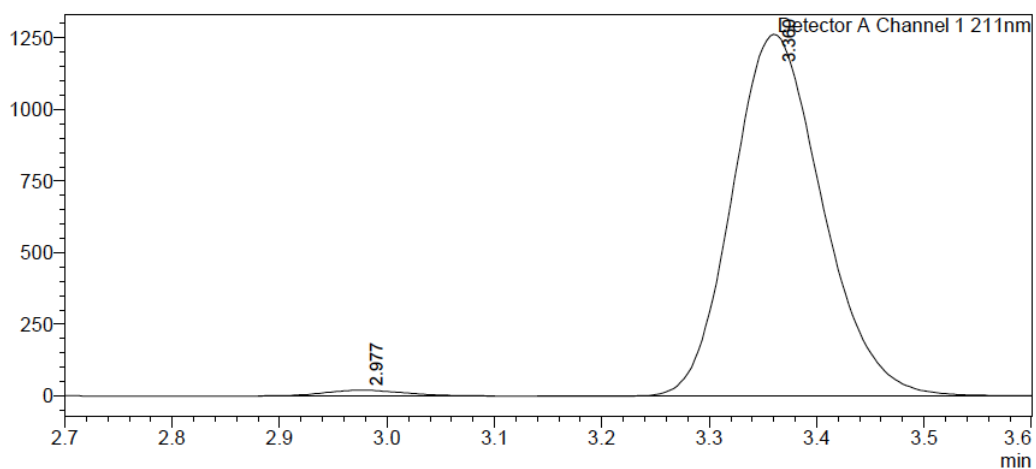

<Peak Table>

| Detector A Channel 1 211nm |           |         |
|----------------------------|-----------|---------|
| Peak#                      | Ret. Time | Area%   |
| 1                          | 2.977     | 1.351   |
| 2                          | 3.360     | 98.649  |
| Total                      |           | 100.000 |

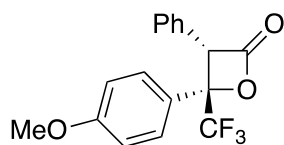

Chiralcel OD-H (97:3 Hexane:IPA, flow rate 1.5 mLmin<sup>-1</sup>, 211 nm, 40 °C)  $t_R(3R,4R)$ : 3.6 min,  $t_R(3S,4S)$ : 4.5 min, 99:1 er .

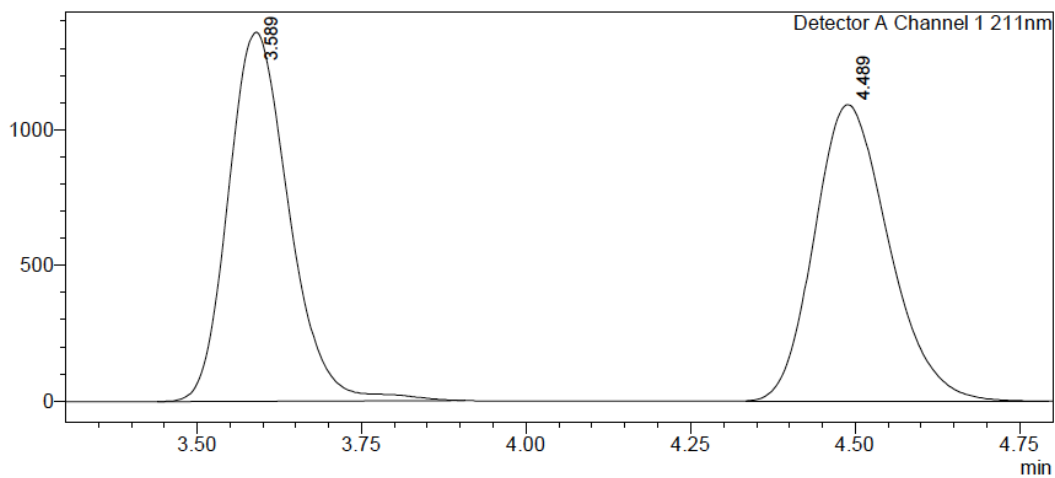

<Peak Table>

| Detector A Channel 1 211nm |           |         |
|----------------------------|-----------|---------|
| Peak#                      | Ret. Time | Area%   |
| 1                          | 3.589     | 50.347  |
| 2                          | 4.489     | 49.653  |
| Total                      |           | 100.000 |

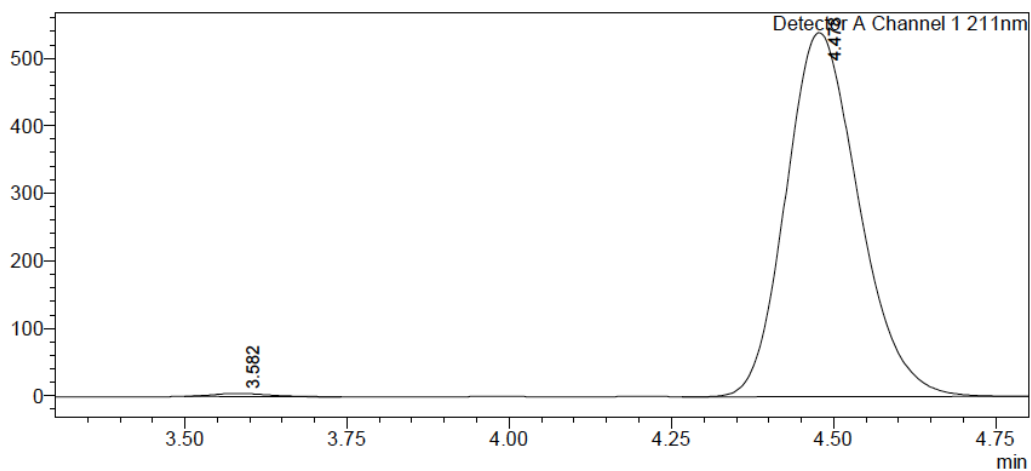

<Peak Table>

| Detector A Channel 1 211nm |           |         |
|----------------------------|-----------|---------|
| Peak#                      | Ret. Time | Area%   |
| 1                          | 3.582     | 0.630   |
| 2                          | 4.478     | 99.370  |
| Total                      |           | 100.000 |

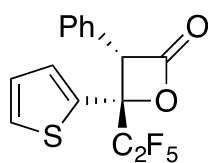

Chiralcel OD-H (99.9:0.1 Hexane:IPA, flow rate 1.5 mLmin<sup>-1</sup>, 211 nm, 40 °C)  $t_R(3R,4S)$ : 5.5 min,  $t_R(3S,4R)$ : 11.9 min, 87:13 er.

mV

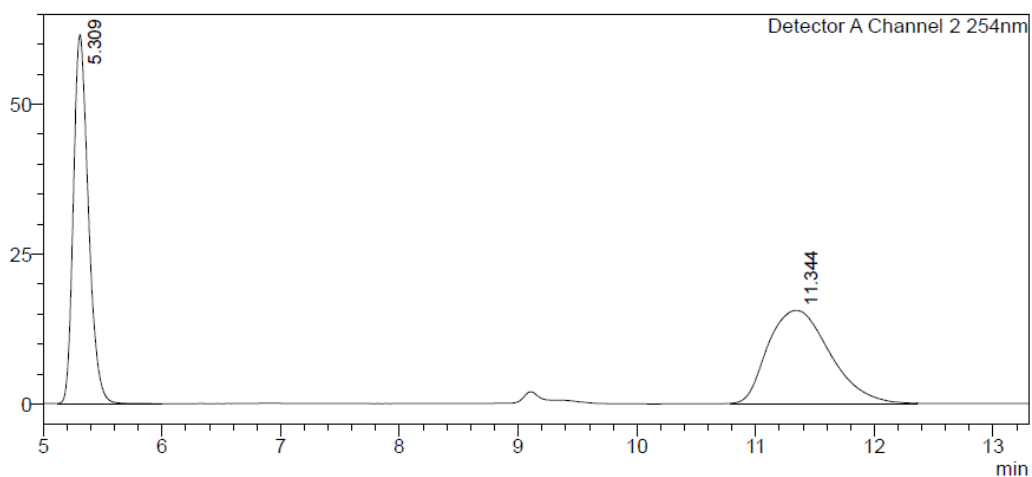

<Peak Table>

| Peak# | Ret. Time | Area%   |
|-------|-----------|---------|
| 1     | 5.309     | 49.057  |
| 2     | 11.344    | 50.943  |
| Total |           | 100.000 |

mV

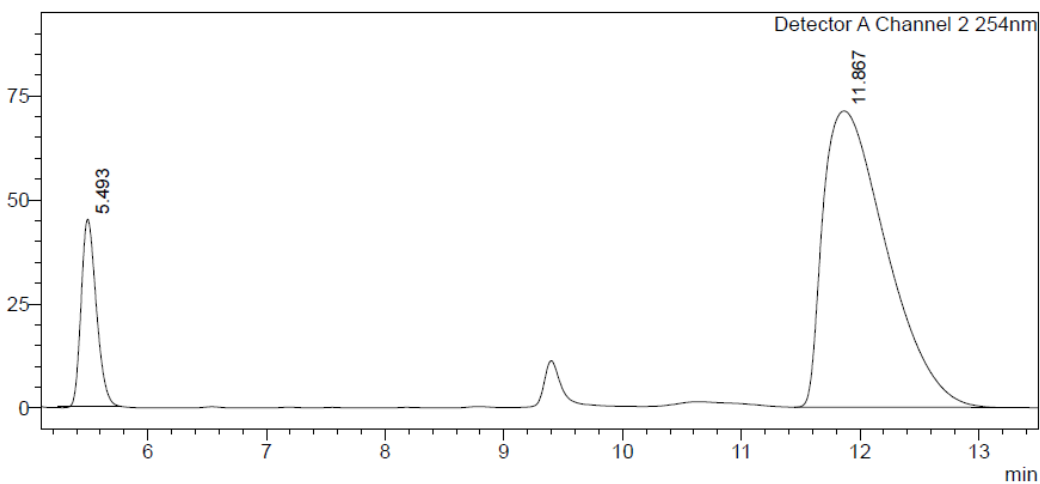

<Peak Table>

| Peak# | Ret. Time | Area%   |
|-------|-----------|---------|
| 1     | 5.493     | 13.055  |
| 2     | 11.867    | 86.945  |
| Total |           | 100.000 |

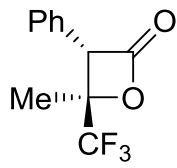

Chiralcel OD-H (97:3 Hexane:IPA, flow rate 1.5 mLmin<sup>-1</sup>, 254 nm, 40 °C)

$t_R(3R,4S)$ : 2.9 min,  $t_R(3S,4R)$ : 3.3 min, 93:7 er.

mAU

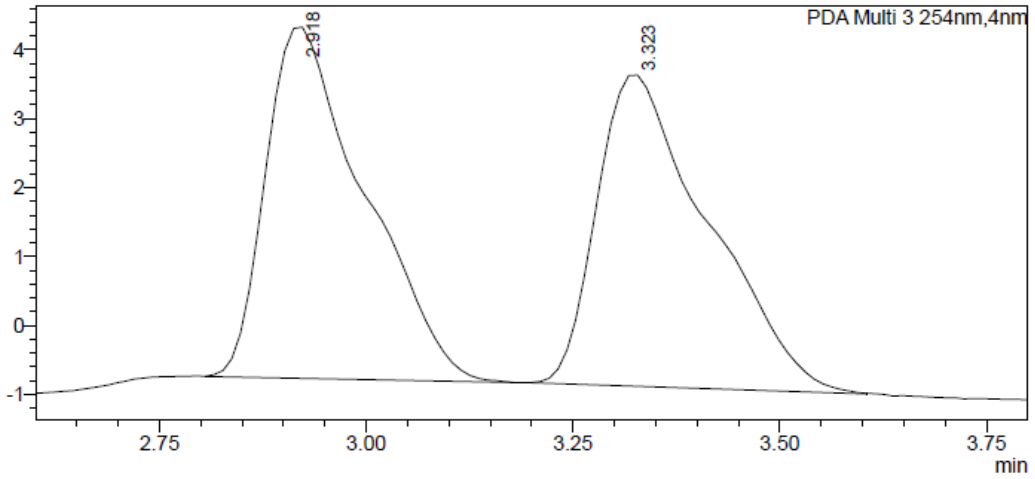

**<Peak Table>**

PDA Ch3 254nm

| Peak# | Ret. Time | Area%   |
|-------|-----------|---------|
| 1     | 2.918     | 50.044  |
| 2     | 3.323     | 49.956  |
| Total |           | 100.000 |

mV

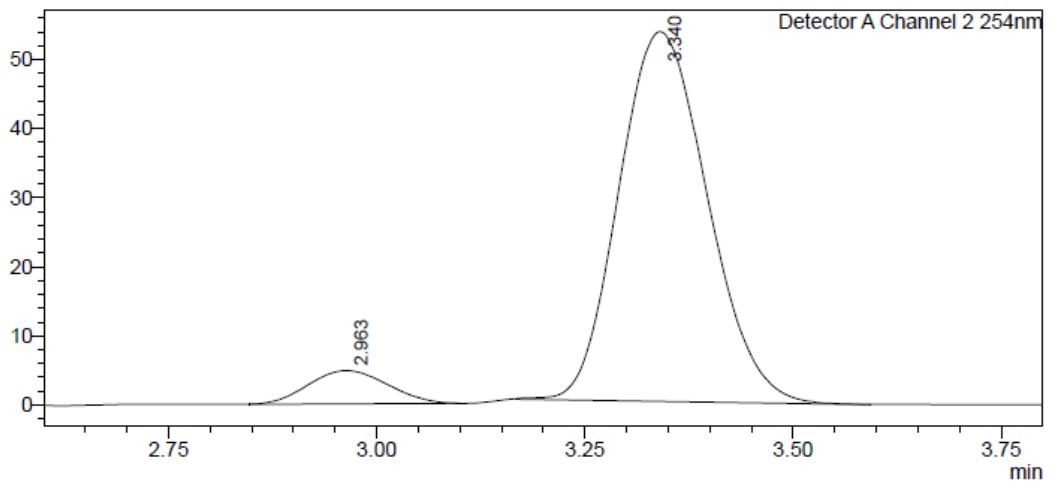

**<Peak Table>**

Detector A Channel 2 254nm

| Peak# | Ret. Time | Area%   |
|-------|-----------|---------|
| 1     | 2.963     | 7.483   |
| 2     | 3.340     | 92.517  |
| Total |           | 100.000 |

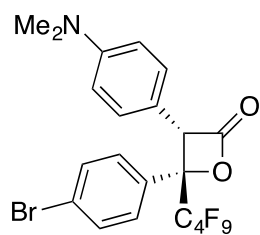

Chiralcel OD-H (97:3 Hexane:IPA, flow rate 1.5 mLmin<sup>-1</sup>, 211 nm, 40 °C)  $t_R(3R,4R)$ : 3.8 min,  $t_R(3S,4S)$ : 4.6 min, 97:3 er.

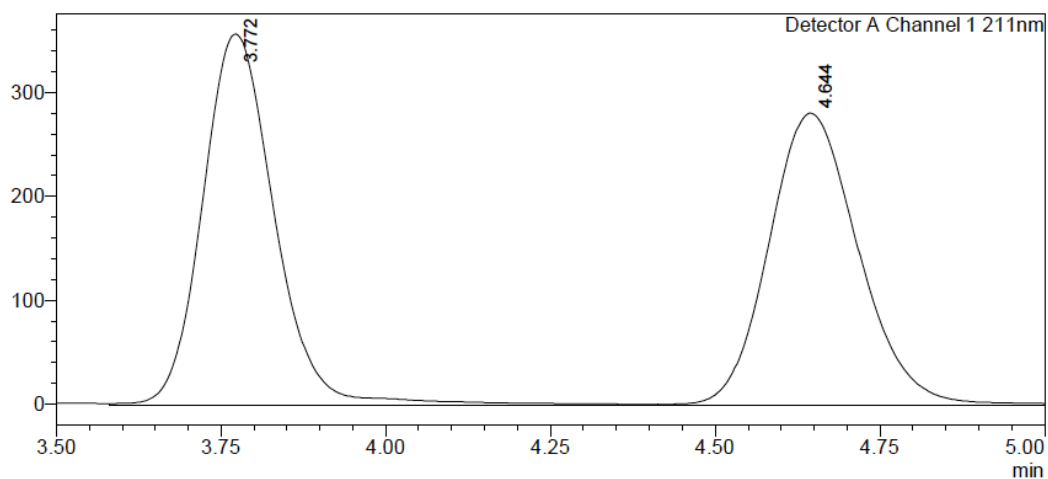

<Peak Table>

| Detector A Channel 1 211nm |           |         |
|----------------------------|-----------|---------|
| Peak#                      | Ret. Time | Area%   |
| 1                          | 3.772     | 50.674  |
| 2                          | 4.644     | 49.326  |
| Total                      |           | 100.000 |

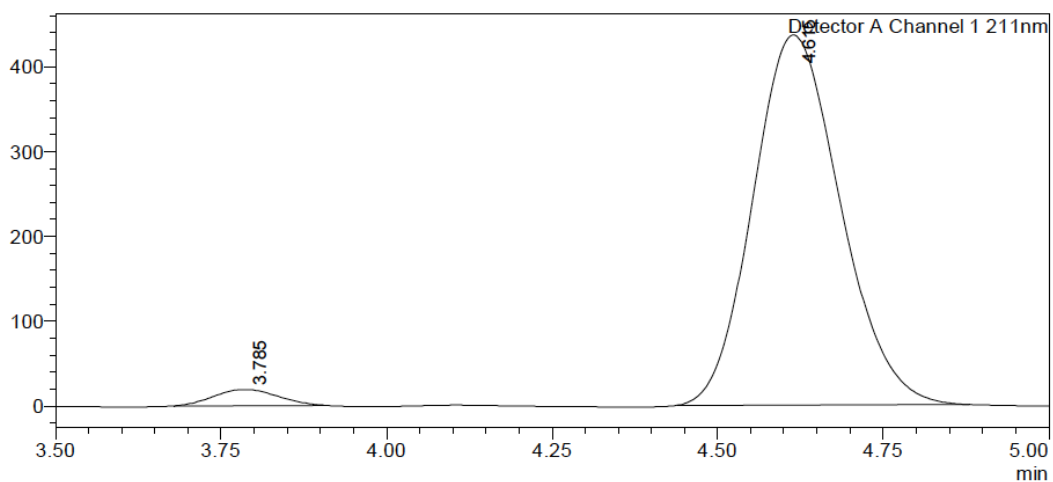

<Peak Table>

| Detector A Channel 1 211nm |           |         |
|----------------------------|-----------|---------|
| Peak#                      | Ret. Time | Area%   |
| 1                          | 3.785     | 3.078   |
| 2                          | 4.615     | 96.922  |
| Total                      |           | 100.000 |

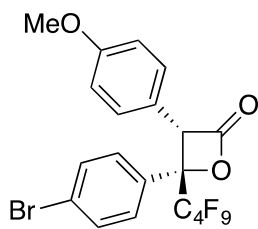

Chiralcel OD-H (97:3 hexane:IPA, flow rate 1.5 mLmin<sup>-1</sup>, 211 nm, 40 °C),  $t_R(3R,4R)$ : 3.3 min,  $t_R(3S,4S)$ : 3.8 min, 97:3 er.

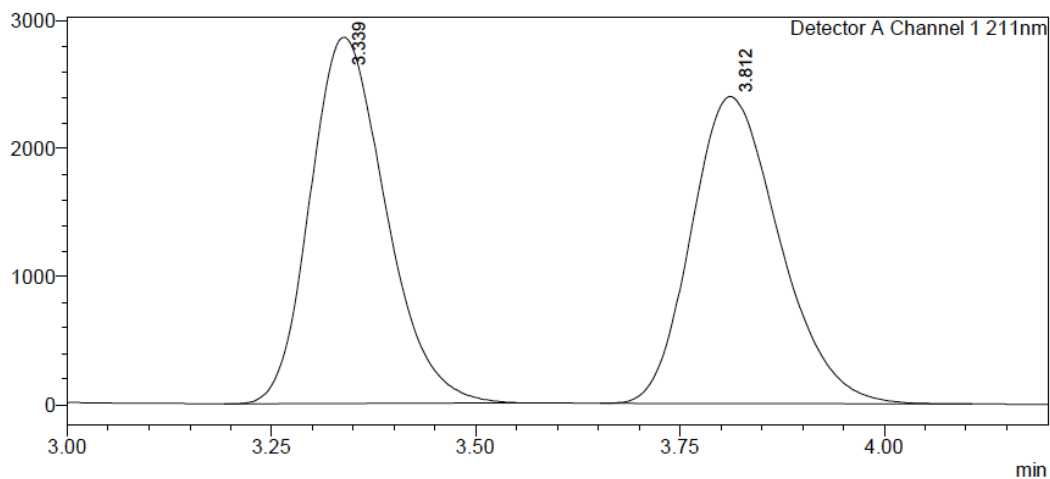

<Peak Table>

Detector A Channel 1 211nm

| Peak# | Ret. Time | Area%   |
|-------|-----------|---------|
| 1     | 3.339     | 50.577  |
| 2     | 3.812     | 49.423  |
| Total |           | 100.000 |

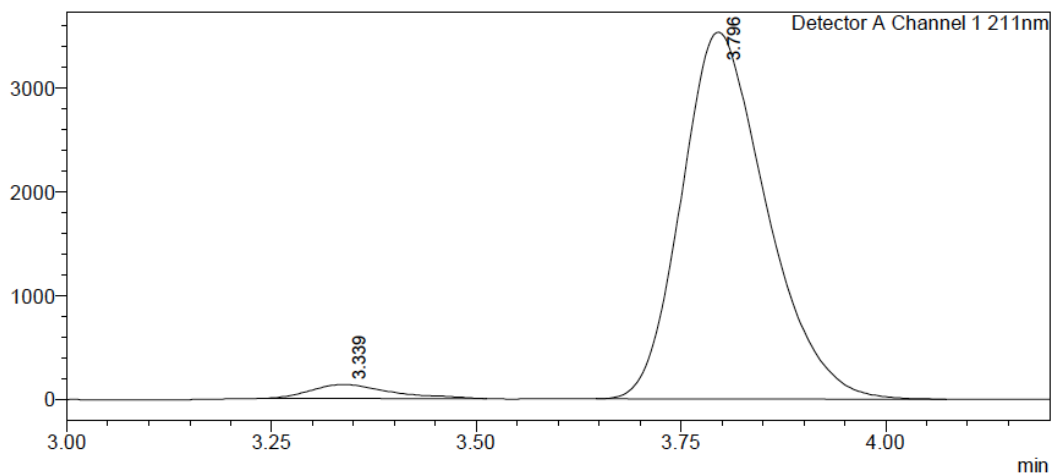

<Peak Table>

Detector A Channel 1 211nm

| Peak# | Ret. Time | Area%   |
|-------|-----------|---------|
| 1     | 3.339     | 3.427   |
| 2     | 3.796     | 96.573  |
| Total |           | 100.000 |



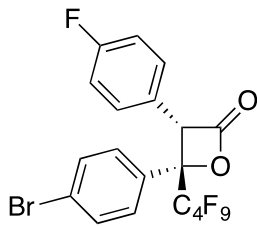

Chiralcel OD-H (97:3 hexane:IPA, flow rate 1.5 mLmin<sup>-1</sup>, 211 nm, 40 °C),  $t_R(3R,4R)$ : 2.8 min,  $t_R(3S,4S)$ : 3.1 min, 96:4 er.

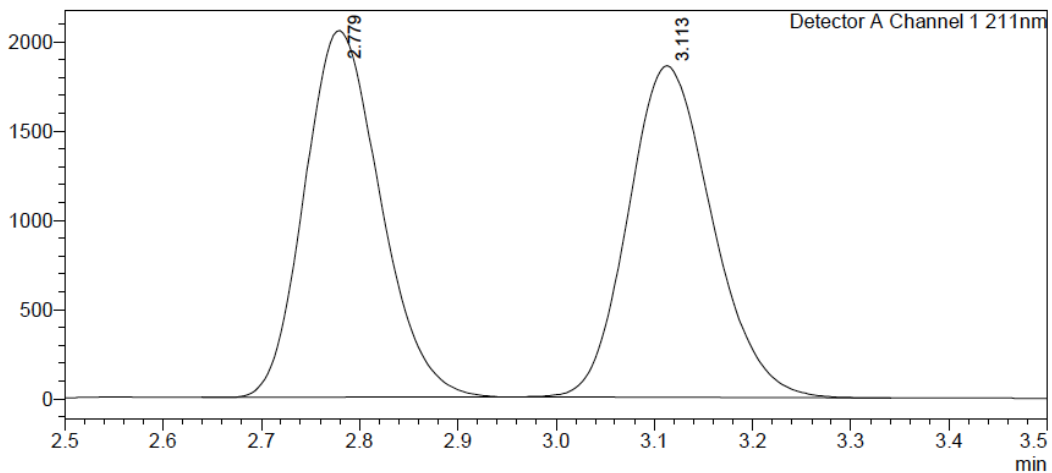

<Peak Table>

| Detector A Channel 1 211nm |           |         |
|----------------------------|-----------|---------|
| Peak#                      | Ret. Time | Area%   |
| 1                          | 2.779     | 49.972  |
| 2                          | 3.113     | 50.028  |
| Total                      |           | 100.000 |

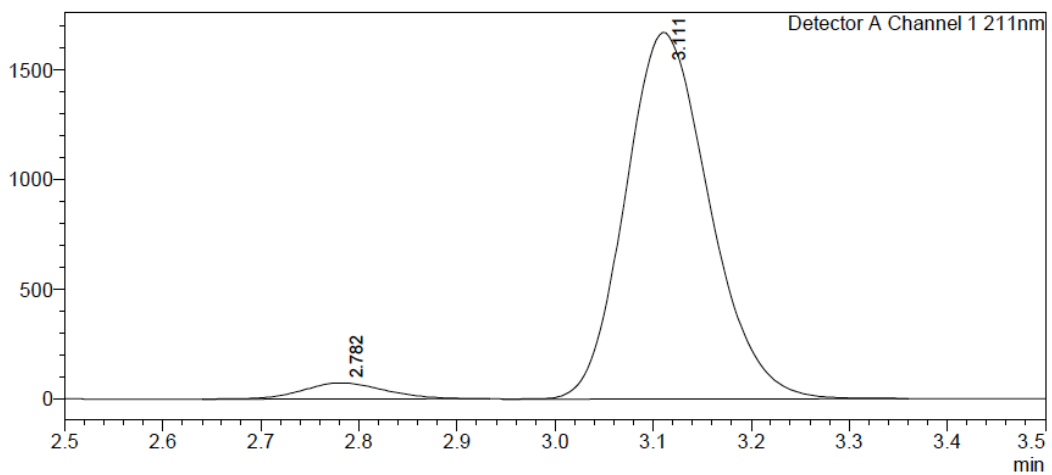

<Peak Table>

| Detector A Channel 1 211nm |           |         |
|----------------------------|-----------|---------|
| Peak#                      | Ret. Time | Area%   |
| 1                          | 2.782     | 4.124   |
| 2                          | 3.111     | 95.876  |
| Total                      |           | 100.000 |

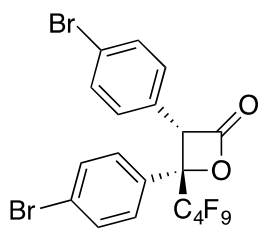

Chiralpak AD-H (99:1 hexane:IPA, flow rate 1.5 mLmin<sup>-1</sup>, 211 nm, 40 °C)  $t_R(3S,4S)$ : 3.6 min,  $t_R(3R,4R)$ : 4.1 min, 95:5 er.

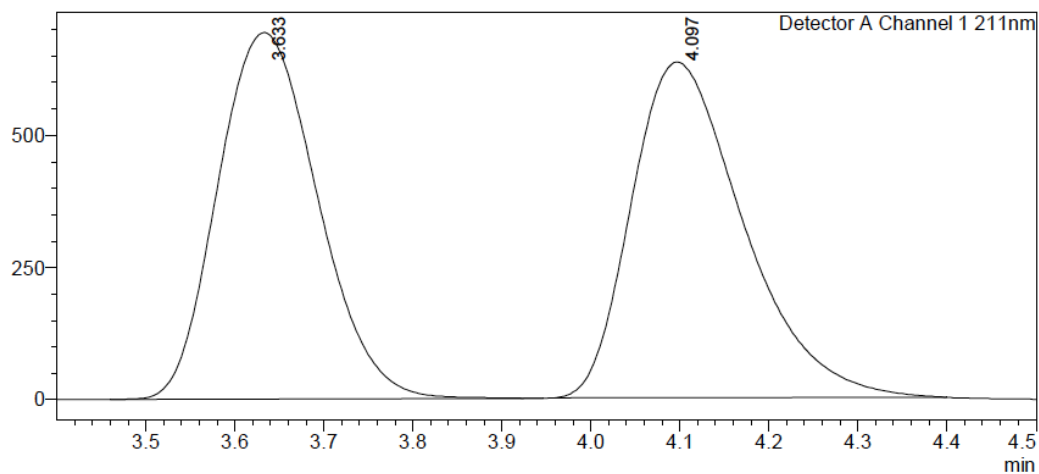

<Peak Table>

| Detector A Channel 1 211nm |           |         |
|----------------------------|-----------|---------|
| Peak#                      | Ret. Time | Area%   |
| 1                          | 3.633     | 49.312  |
| 2                          | 4.097     | 50.688  |
| Total                      |           | 100.000 |

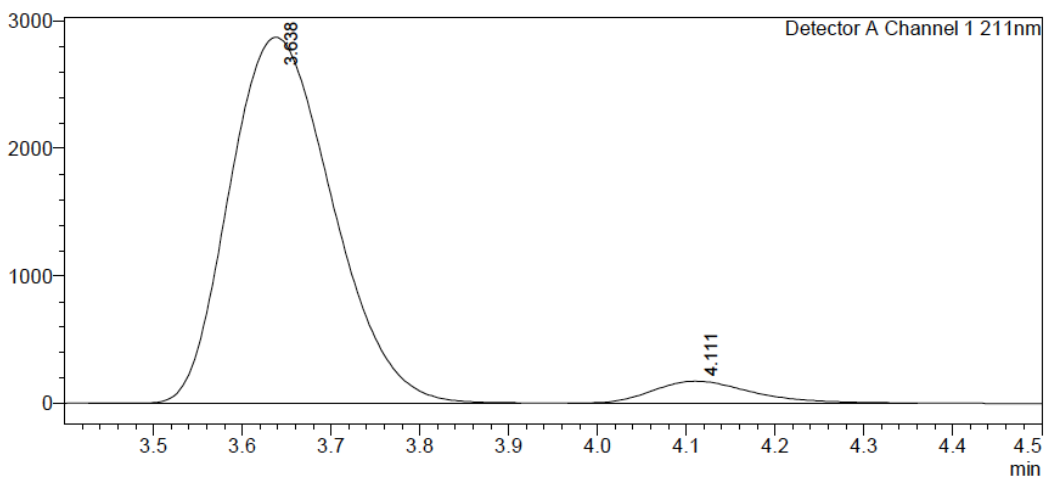

<Peak Table>

| Detector A Channel 1 211nm |           |         |
|----------------------------|-----------|---------|
| Peak#                      | Ret. Time | Area%   |
| 1                          | 3.638     | 94.558  |
| 2                          | 4.111     | 5.442   |
| Total                      |           | 100.000 |

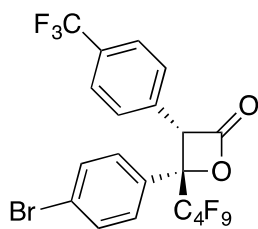

Chiralpak AD-H (99:1 hexane:IPA, flow rate 1.5 mLmin<sup>-1</sup>, 211 nm, 40 °C),  $t_R(3S,4S)$ : 3.2 min,  $t_R(3R,4R)$ : 4.0 min, 95:5 er .

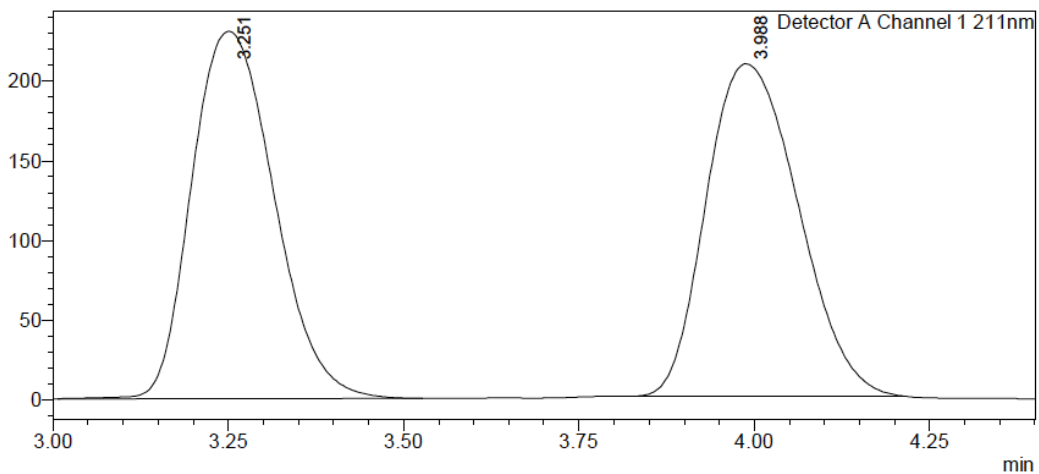

<Peak Table>

| Detector A Channel 1 211nm |           |         |
|----------------------------|-----------|---------|
| Peak#                      | Ret. Time | Area%   |
| 1                          | 3.251     | 49.757  |
| 2                          | 3.988     | 50.243  |
| Total                      |           | 100.000 |

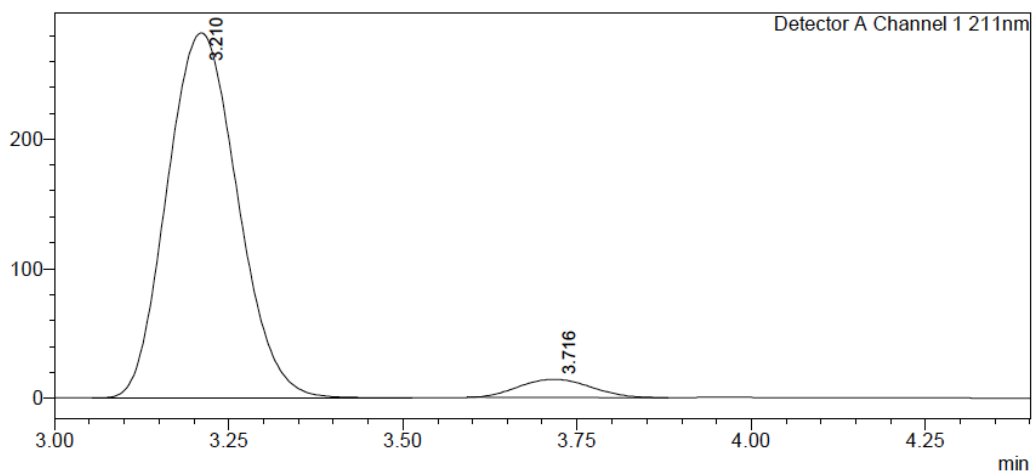

<Peak Table>

| Detector A Channel 1 211nm |           |         |
|----------------------------|-----------|---------|
| Peak#                      | Ret. Time | Area%   |
| 1                          | 3.210     | 95.113  |
| 2                          | 3.716     | 4.887   |
| Total                      |           | 100.000 |

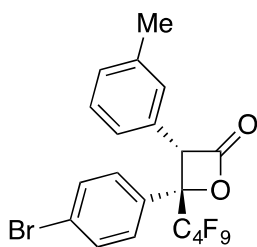

Chiralcel OD-H (97:3 hexane:IPA, flow rate 1.5 mLmin<sup>-1</sup>, 211 nm, 40 °C),  $t_R(3R,4R)$ : 2.6 min,  $t_R(3S,4S)$ : 3.3 min, 97:3 er.

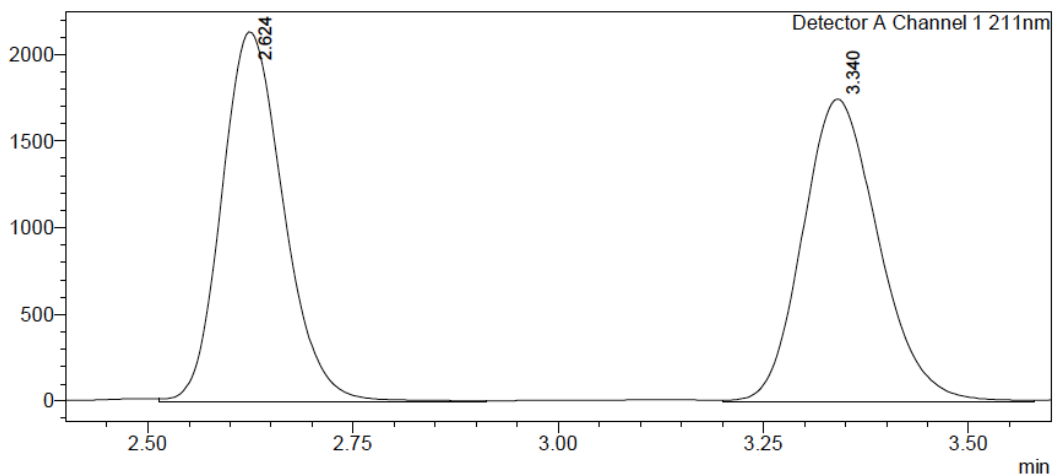

<Peak Table>

| Detector A Channel 1 211nm |           |         |
|----------------------------|-----------|---------|
| Peak#                      | Ret. Time | Area%   |
| 1                          | 2.624     | 49.876  |
| 2                          | 3.340     | 50.124  |
| Total                      |           | 100.000 |

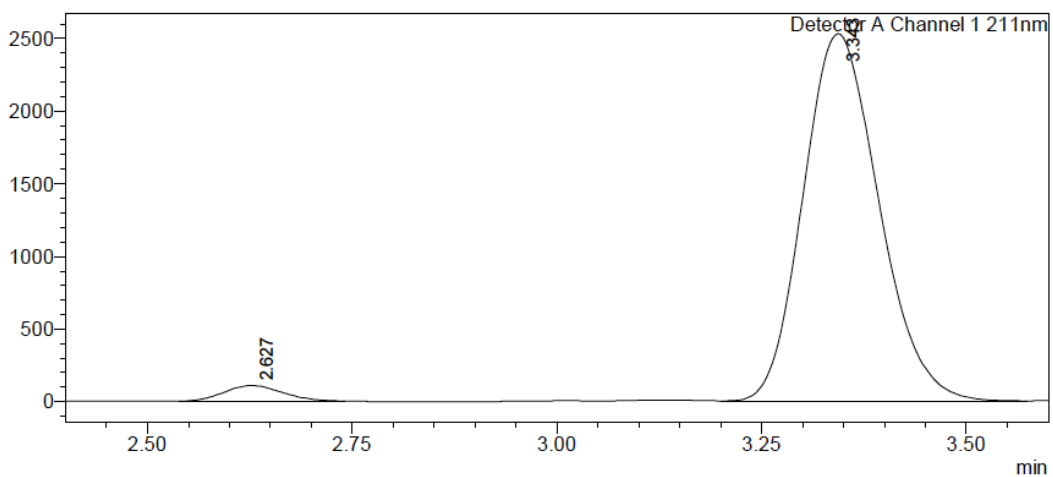

<Peak Table>

| Detector A Channel 1 211nm |           |         |
|----------------------------|-----------|---------|
| Peak#                      | Ret. Time | Area%   |
| 1                          | 2.627     | 3.144   |
| 2                          | 3.343     | 96.856  |
| Total                      |           | 100.000 |

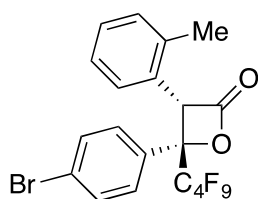

Chiralcel OD-H (97:3 hexane:IPA, flow rate 1.5 mLmin<sup>-1</sup>, 211 nm, 40 °C),  $t_R(3R,4R)$ : 2.8 min,  $t_R(3S,4S)$ : 3.8 min, 99:1 er.

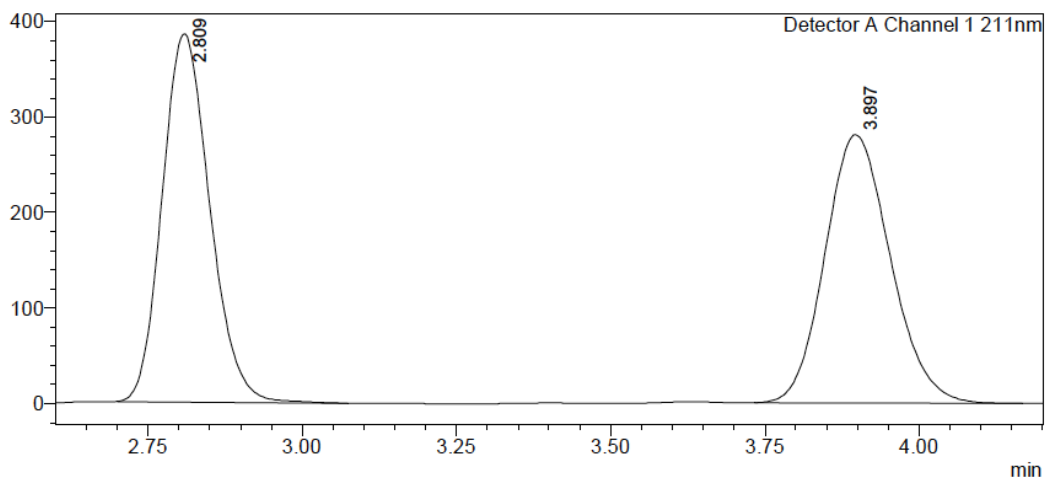

**<Peak Table>**

| Detector A Channel 1 211nm |           |         |
|----------------------------|-----------|---------|
| Peak#                      | Ret. Time | Area%   |
| 1                          | 2.809     | 49.993  |
| 2                          | 3.897     | 50.007  |
| Total                      |           | 100.000 |

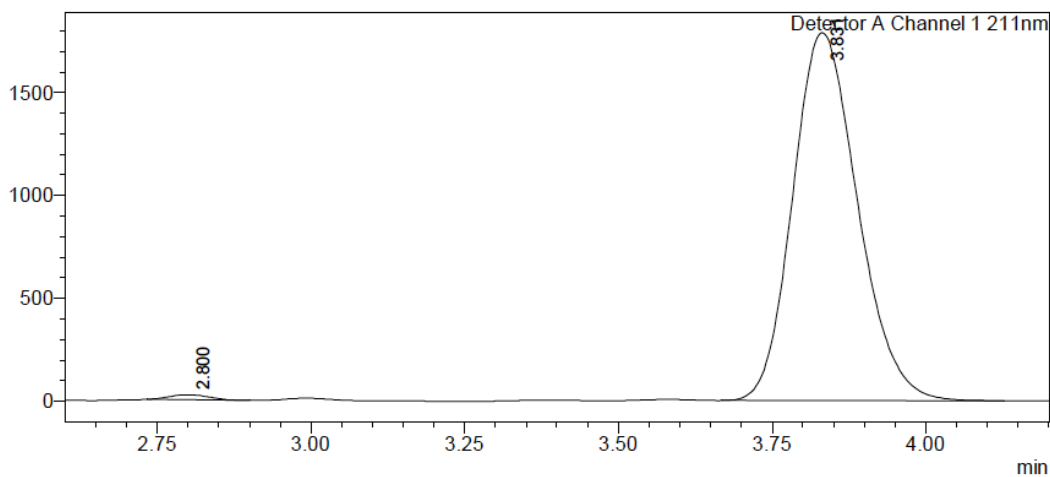

**<Peak Table>**

| Detector A Channel 1 211nm |           |         |
|----------------------------|-----------|---------|
| Peak#                      | Ret. Time | Area%   |
| 1                          | 2.800     | 0.846   |
| 2                          | 3.831     | 99.154  |
| Total                      |           | 100.000 |

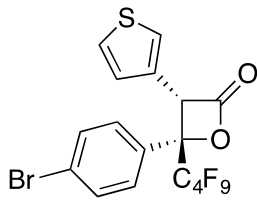

Chiralcel OD-H (97:3 hexane:IPA, flow rate 1.5 mLmin<sup>-1</sup>, 211 nm, 40 °C),  $t_R(3R,4R)$ : 3.1 min,  $t_R(3S,4S)$ : 3.8 min, 94:6 er.

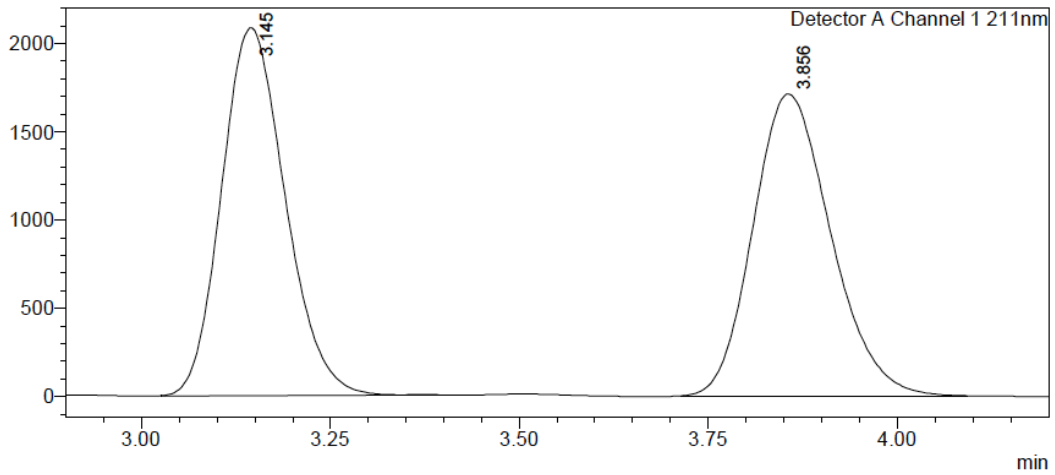

<Peak Table>

| Detector A Channel 1 211nm |           |         |
|----------------------------|-----------|---------|
| Peak#                      | Ret. Time | Area%   |
| 1                          | 3.145     | 49.893  |
| 2                          | 3.856     | 50.107  |
| Total                      |           | 100.000 |

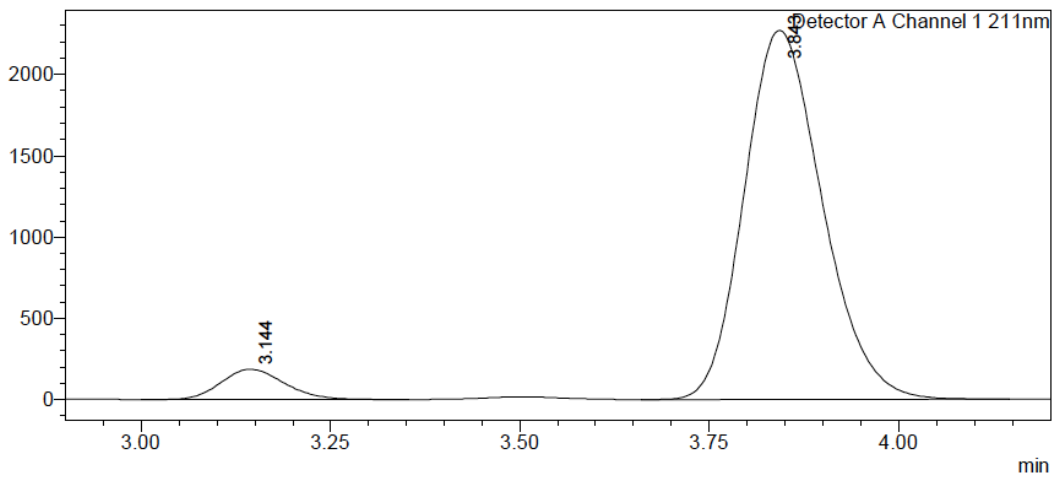

<Peak Table>

| Detector A Channel 1 211nm |           |         |
|----------------------------|-----------|---------|
| Peak#                      | Ret. Time | Area%   |
| 1                          | 3.144     | 6.253   |
| 2                          | 3.843     | 93.747  |
| Total                      |           | 100.000 |

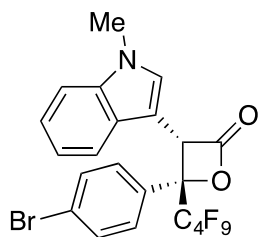

Chiralpak AS-H (99:1 hexane:IPA, flow rate 1.5 mLmin<sup>-1</sup>, 211 nm, 40 °C),  $t_R(3R,4R)$ : 3.9 min,  $t_R(3S,4S)$ : 5.2 min, 99:1 er.

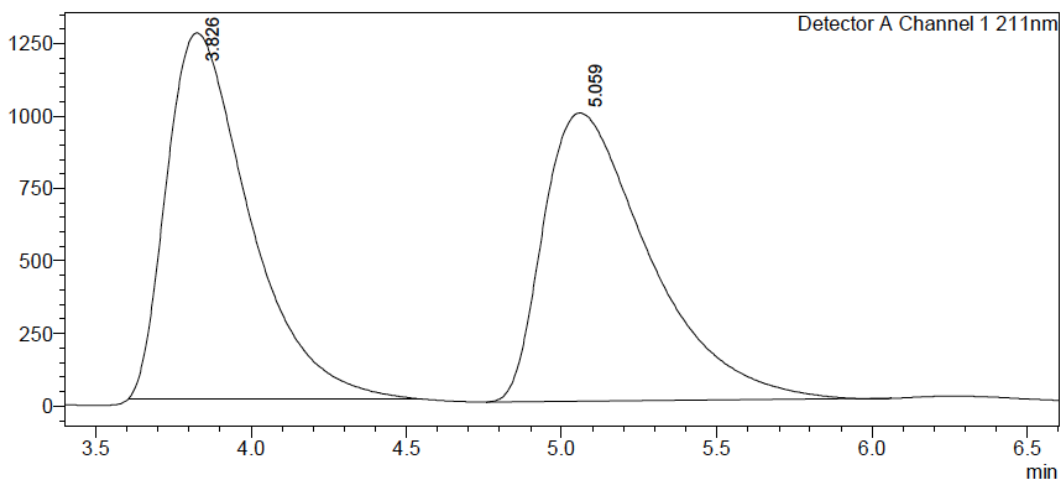

**<Peak Table>**

Detector A Channel 1 211nm

| Peak# | Ret. Time | Area%   |
|-------|-----------|---------|
| 1     | 3.826     | 49.744  |
| 2     | 5.059     | 50.256  |
| Total |           | 100.000 |

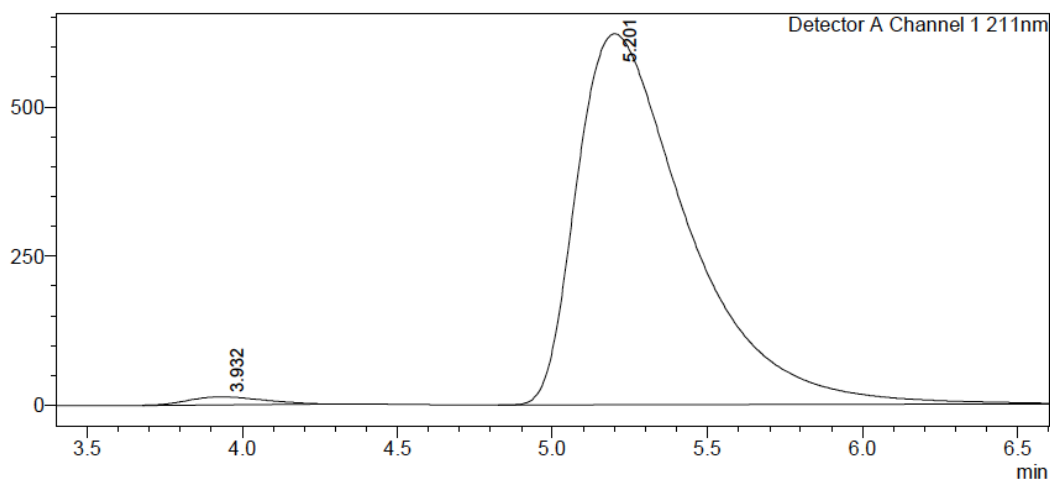

**<Peak Table>**

Detector A Channel 1 211nm

| Peak# | Ret. Time | Area%   |
|-------|-----------|---------|
| 1     | 3.932     | 1.450   |
| 2     | 5.201     | 98.550  |
| Total |           | 100.000 |

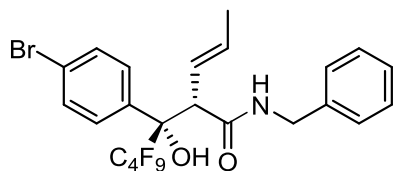

Chiralpak AD-H (98:2 hexane:IPA, flow rate 1.5 mLmin<sup>-1</sup>, 254 nm, 40 °C),  $t_R(3R,4R)$ : 9.9 min,  $t_R(3S,4S)$ : 13.2 min, 86:14 er.

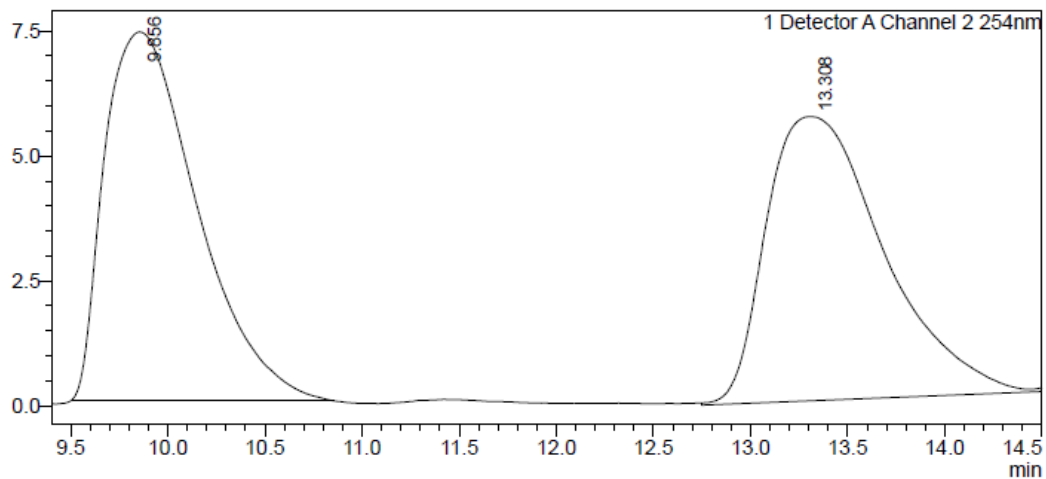

**<Peak Table>**

Detector A Channel 2 254nm

| Peak# | Ret. Time | Area%   |
|-------|-----------|---------|
| 1     | 9.856     | 49.961  |
| 2     | 13.308    | 50.039  |
| Total |           | 100.000 |

mV

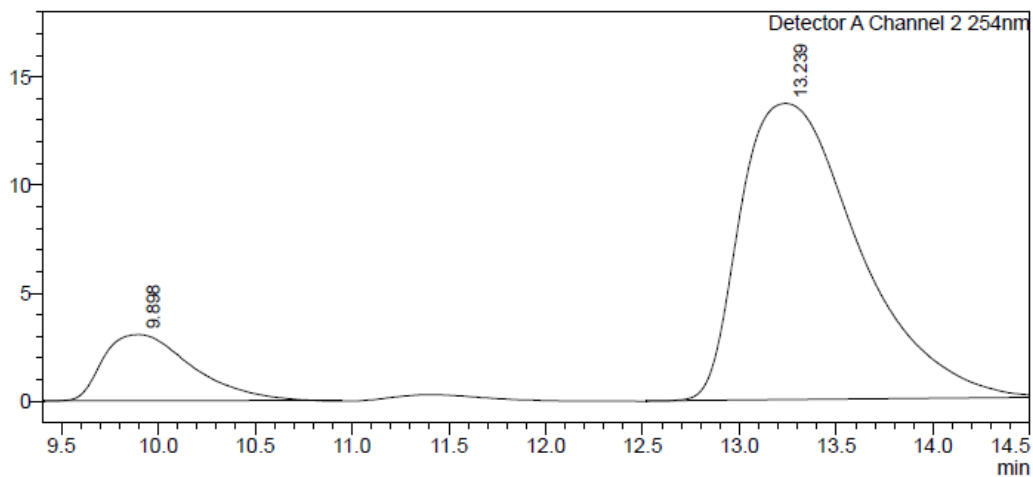

**<Peak Table>**

Detector A Channel 2 254nm

| Peak# | Ret. Time | Area%   |
|-------|-----------|---------|
| 1     | 9.898     | 14.204  |
| 2     | 13.239    | 85.796  |
| Total |           | 100.000 |



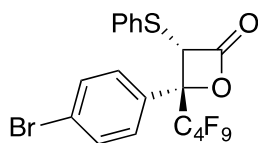

Chiralcel OD-H (99.5:0.5 Hexane:IPA, flow rate 1.5 mLmin<sup>-1</sup>, 211 nm, 40 °C)  $t_R(3R,4R)$ : 3.9 min,  $t_R(3S,4S)$ : 4.4 min, 83:17 er.

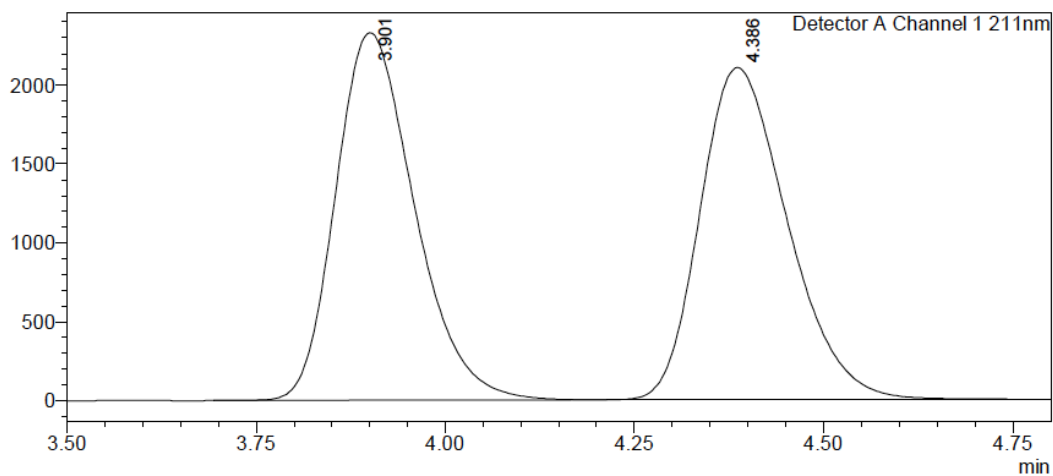

<Peak Table>

| Detector A Channel 1 211nm |           |         |
|----------------------------|-----------|---------|
| Peak#                      | Ret. Time | Area%   |
| 1                          | 3.901     | 49.910  |
| 2                          | 4.386     | 50.090  |
| Total                      |           | 100.000 |

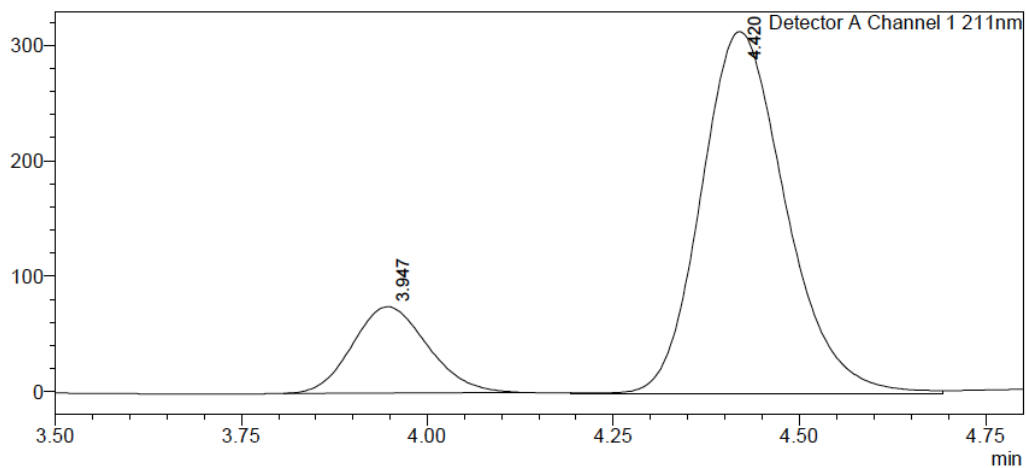

<Peak Table>

| Detector A Channel 1 211nm |           |         |
|----------------------------|-----------|---------|
| Peak#                      | Ret. Time | Area%   |
| 1                          | 3.947     | 17.494  |
| 2                          | 4.420     | 82.506  |
| Total                      |           | 100.000 |

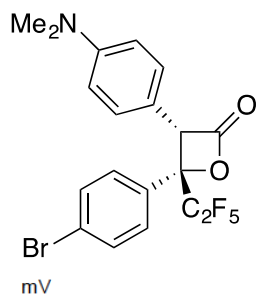

Chiralcel OD-H (97:3 Hexane:IPA, flow rate 1.5 mLmin<sup>-1</sup>, 211 nm, 40 °C) *t<sub>R</sub>*(3*R*,4*R*): 4.0 min, *t<sub>R</sub>*(3*S*,4*S*): 5.3 min, 96:4 er.

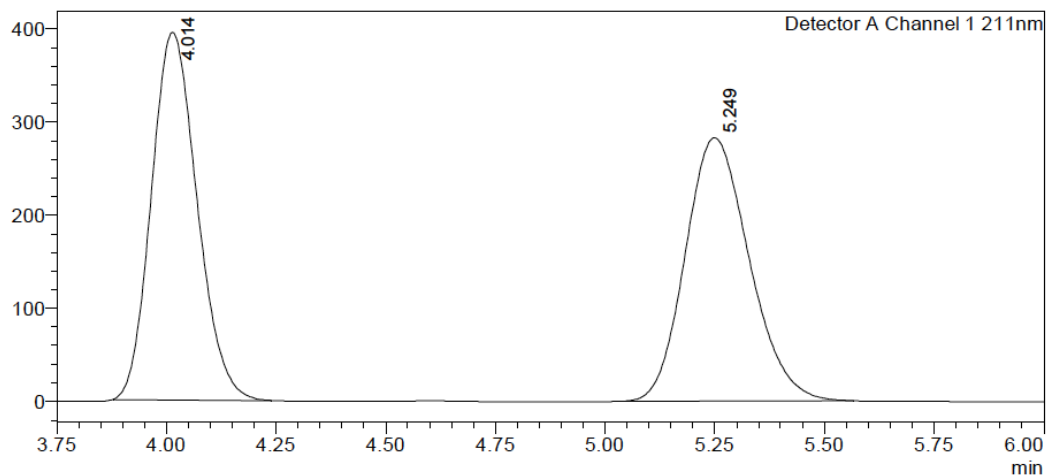

<Peak Table>

Detector A Channel 1 211nm

| Peak# | Ret. Time | Area%   |
|-------|-----------|---------|
| 1     | 4.014     | 49.935  |
| 2     | 5.249     | 50.065  |
| Total |           | 100.000 |

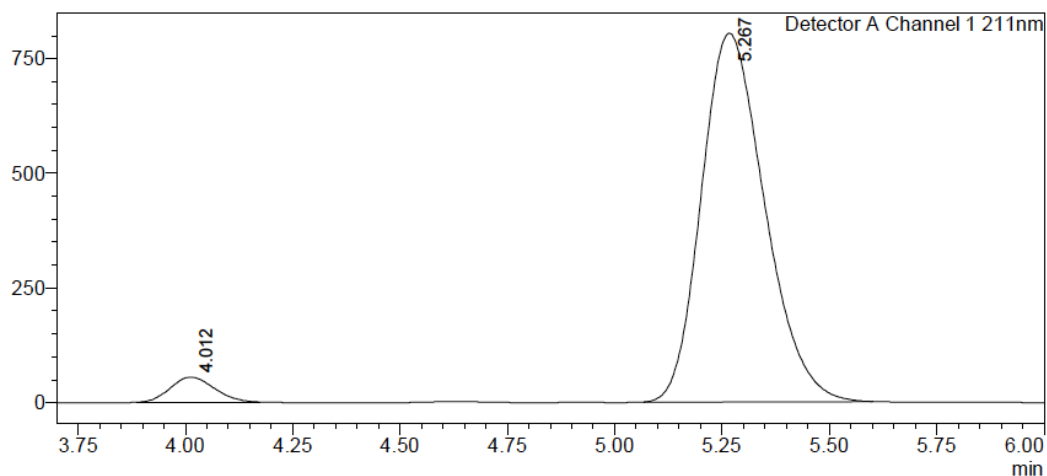

<Peak Table>

Detector A Channel 1 211nm

| Peak# | Ret. Time | Area%   |
|-------|-----------|---------|
| 1     | 4.012     | 4.500   |
| 2     | 5.267     | 95.500  |
| Total |           | 100.000 |

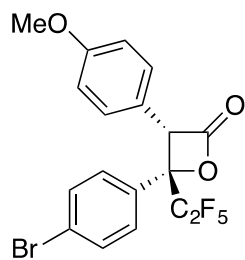

Chiralcel OD-H (97:3 Hexane : IPA, flow rate 1.5 mLmin<sup>-1</sup>, 211 nm, 40 °C)  $t_R(3R,4R)$ : 3.6 min,  $t_R(3S,4S)$ : 4.4 min, 96:4 er.

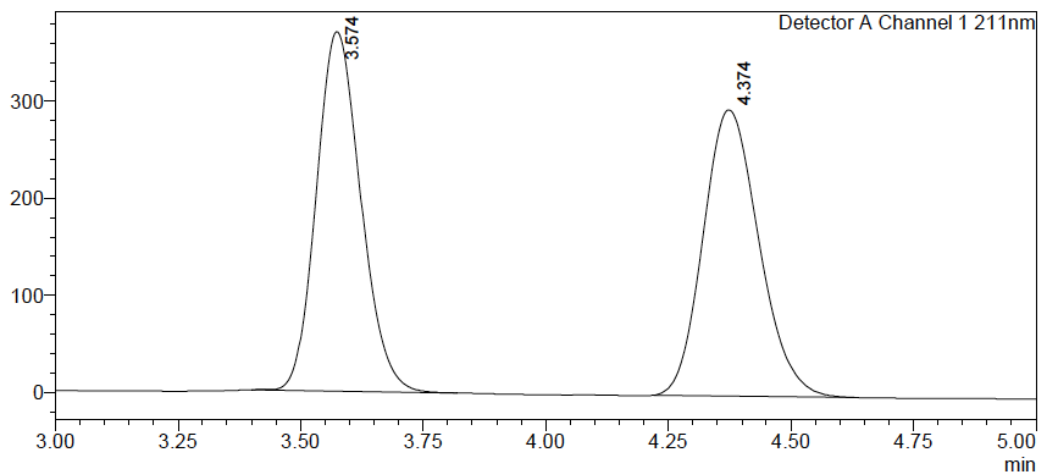

<Peak Table>

| Detector A Channel 1 211nm |           |         |
|----------------------------|-----------|---------|
| Peak#                      | Ret. Time | Area%   |
| 1                          | 3.574     | 49.999  |
| 2                          | 4.374     | 50.001  |
| Total                      |           | 100.000 |

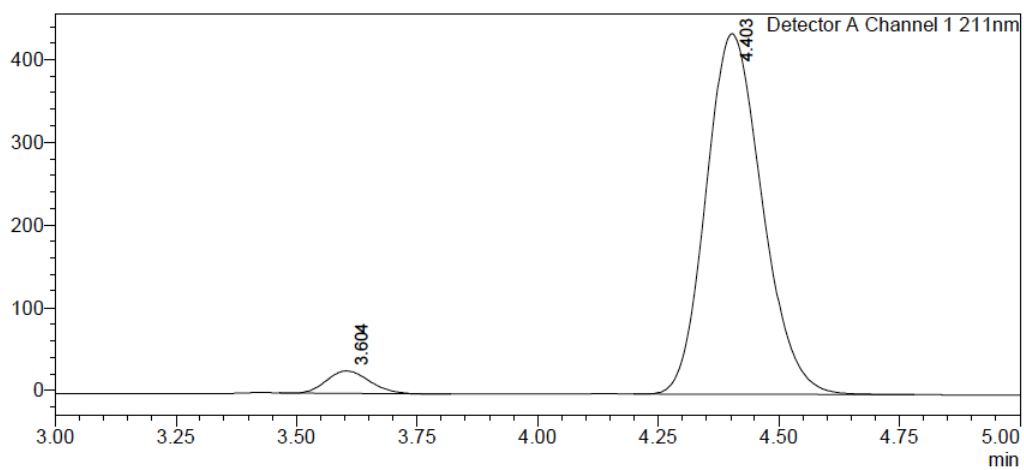

<Peak Table>

| Detector A Channel 1 211nm |           |         |
|----------------------------|-----------|---------|
| Peak#                      | Ret. Time | Area%   |
| 1                          | 3.604     | 4.491   |
| 2                          | 4.403     | 95.509  |
| Total                      |           | 100.000 |

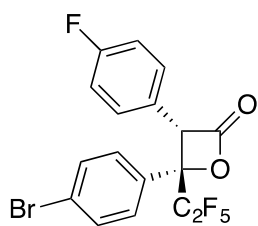

Chiralcel OD-H (97:3 Hexane:IPA, flow rate  $1.5 \text{ mLmin}^{-1}$ , 211 nm, 40 °C)  $t_R(3R,4R)$ : 3.0 min,  $t_R(3S,4S)$ : 3.5 min, 95:5 er.

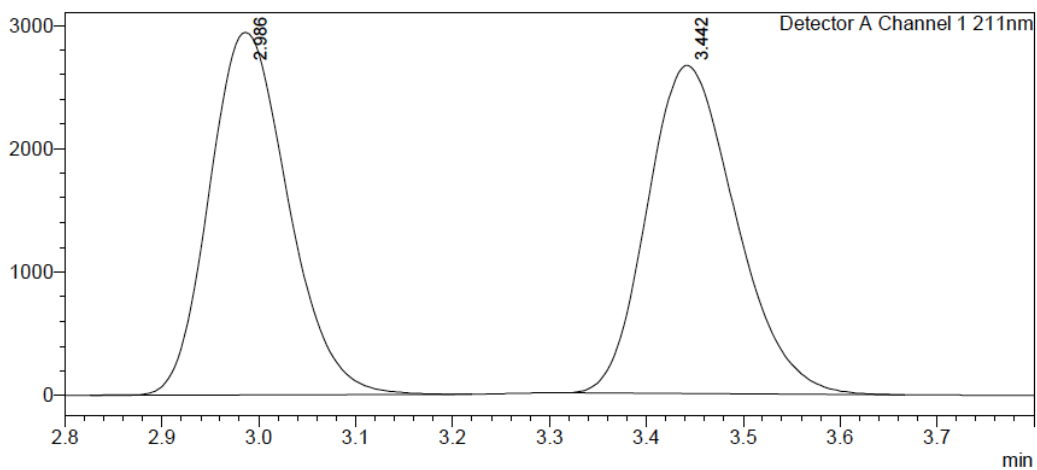

<Peak Table>

| Detector A Channel 1 211nm |           |         |
|----------------------------|-----------|---------|
| Peak#                      | Ret. Time | Area%   |
| 1                          | 2.986     | 49.474  |
| 2                          | 3.442     | 50.526  |
| Total                      |           | 100.000 |

mV

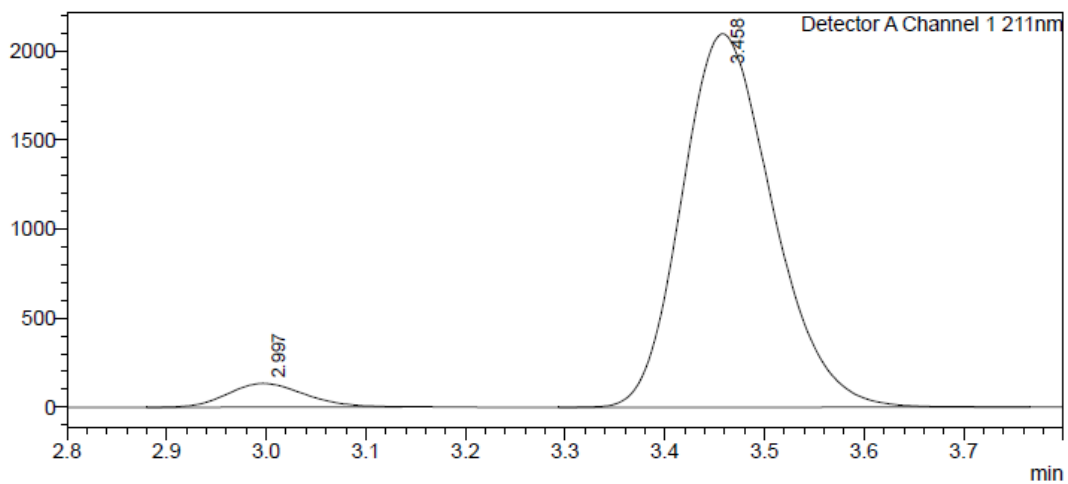

<Peak Table>

| Detector A Channel 1 211nm |           |         |
|----------------------------|-----------|---------|
| Peak#                      | Ret. Time | Area%   |
| 1                          | 2.997     | 5.059   |
| 2                          | 3.458     | 94.941  |
| Total                      |           | 100.000 |

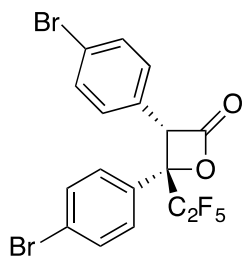

Chiralcel OD-H (97:3 Hexane:IPA, flow rate  $1.5 \text{ mLmin}^{-1}$ , 211 nm, 40 °C)  $t_R(3R,4R)$ : 3.6 min,  $t_R(3S,4S)$ : 4.1 min, 95:5 er.

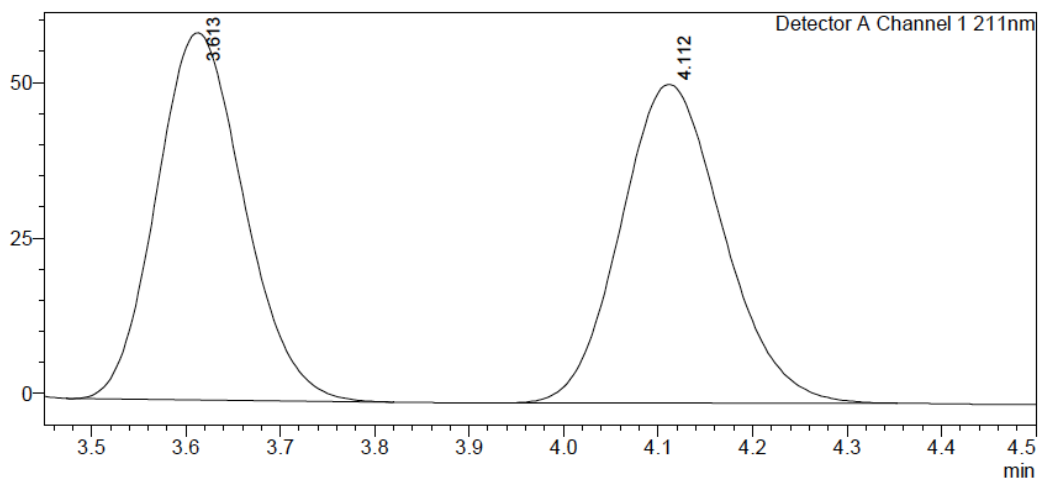

<Peak Table>

| Detector A Channel 1 211nm |           |         |
|----------------------------|-----------|---------|
| Peak#                      | Ret. Time | Area%   |
| 1                          | 3.613     | 49.614  |
| 2                          | 4.112     | 50.386  |
| Total                      |           | 100.000 |

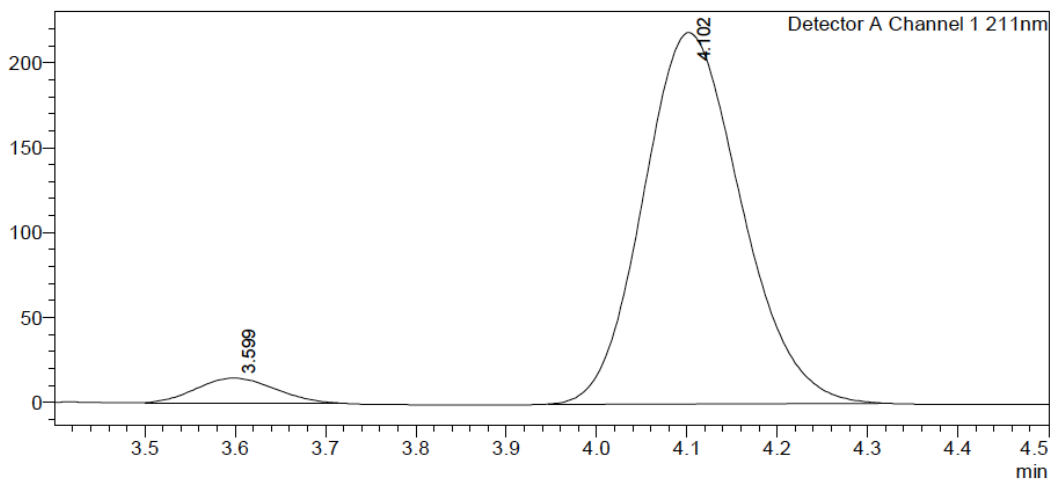

<Peak Table>

| Detector A Channel 1 211nm |           |         |
|----------------------------|-----------|---------|
| Peak#                      | Ret. Time | Area%   |
| 1                          | 3.599     | 5.004   |
| 2                          | 4.102     | 94.996  |
| Total                      |           | 100.000 |

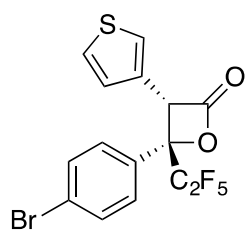

Chiralcel OD-H (97:3 Hexane:IPA, flow rate 1.5 mLmin<sup>-1</sup>, 211 nm, 40 °C)  $t_R(3R,4R)$ : 3.4 min,  $t_R(3S,4S)$ : 4.6 min, 93:7 er.

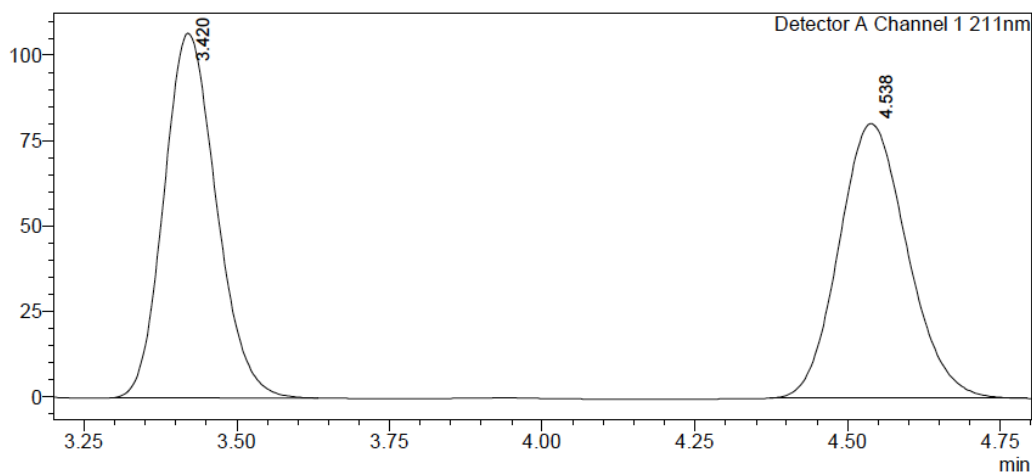

<Peak Table>

| Detector A Channel 1 211nm |           |         |
|----------------------------|-----------|---------|
| Peak#                      | Ret. Time | Area%   |
| 1                          | 3.420     | 50.431  |
| 2                          | 4.538     | 49.569  |
| Total                      |           | 100.000 |

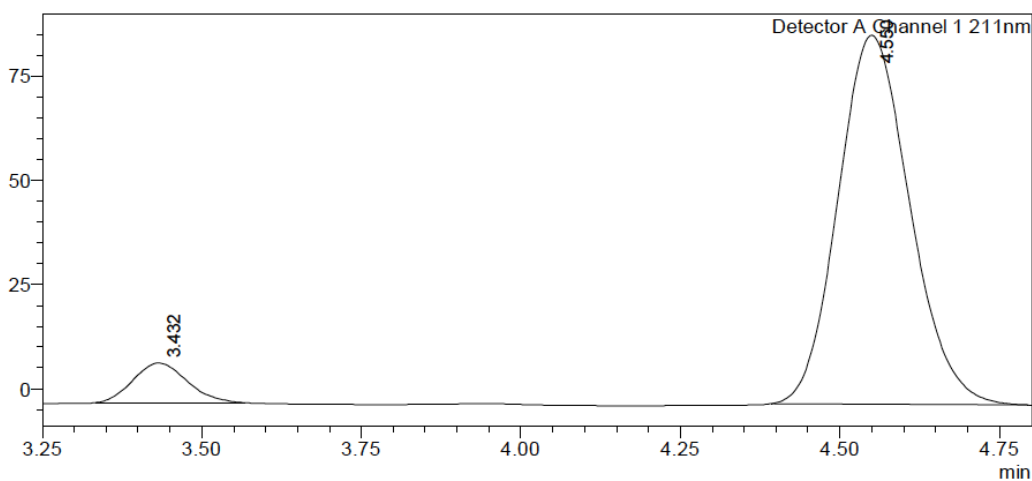

<Peak Table>

| Detector A Channel 1 211nm |           |         |
|----------------------------|-----------|---------|
| Peak#                      | Ret. Time | Area%   |
| 1                          | 3.432     | 7.431   |
| 2                          | 4.550     | 92.569  |
| Total                      |           | 100.000 |

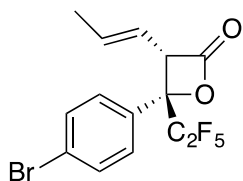

Chiralpak AD-H (99:1 Hexane:IPA, flow rate 1.5 mLmin<sup>-1</sup>, 211 nm, 40 °C)  $t_R(3S,4S)$ : 2.9 min,  $t_R(3R,4R)$ : 3.3 min, 83:17 er.

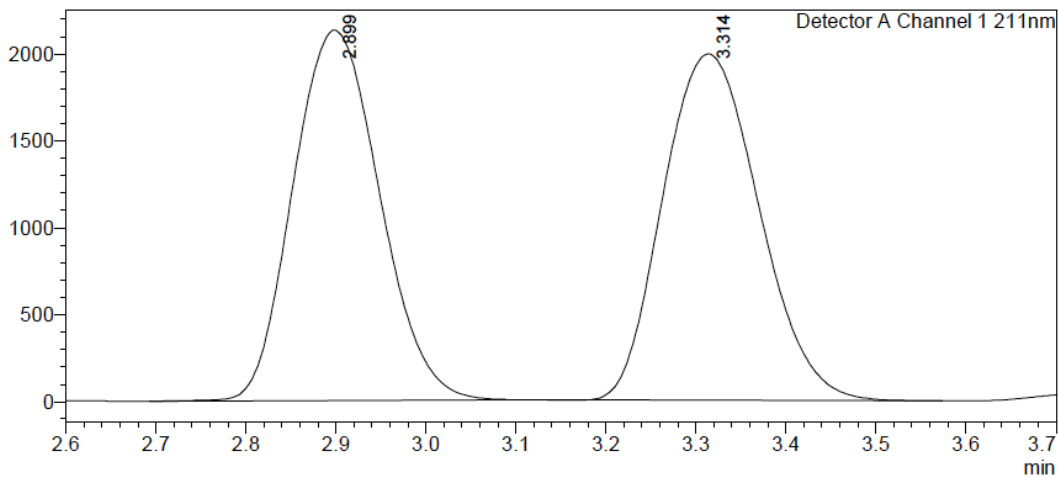

**<Peak Table>**

| Detector A Channel 1 211nm |           |         |
|----------------------------|-----------|---------|
| Peak#                      | Ret. Time | Area%   |
| 1                          | 2.899     | 49.123  |
| 2                          | 3.314     | 50.877  |
| Total                      |           | 100.000 |

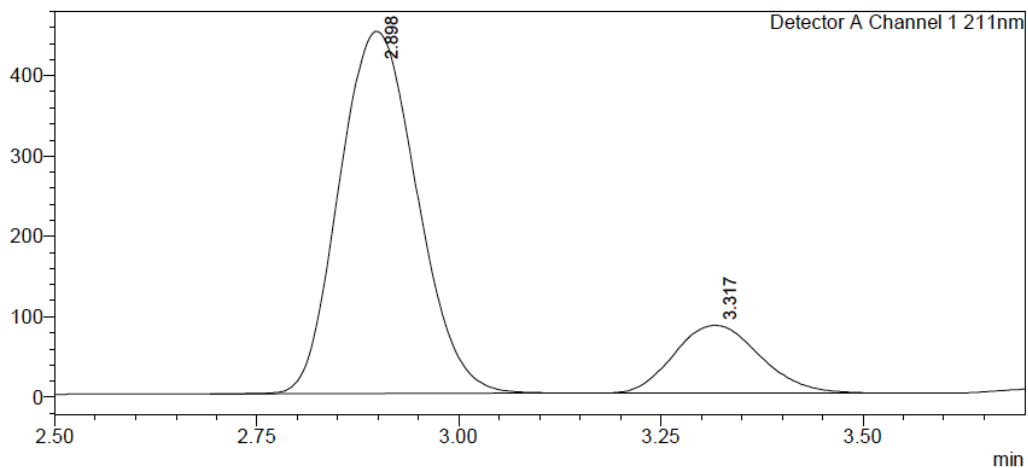

**<Peak Table>**

| Detector A Channel 1 211nm |           |         |
|----------------------------|-----------|---------|
| Peak#                      | Ret. Time | Area%   |
| 1                          | 2.898     | 82.879  |
| 2                          | 3.317     | 17.121  |
| Total                      |           | 100.000 |

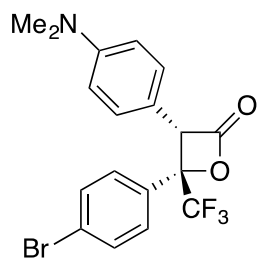

Chiralcel OD-H (97:3 Hexane:IPA, flow rate 1.5 mLmin<sup>-1</sup>, 211 nm, 40 °C)  $t_R(3R,4R)$ : 4.7 min,  $t_R(3S,4S)$ : 6.2 min, 95:5 er.

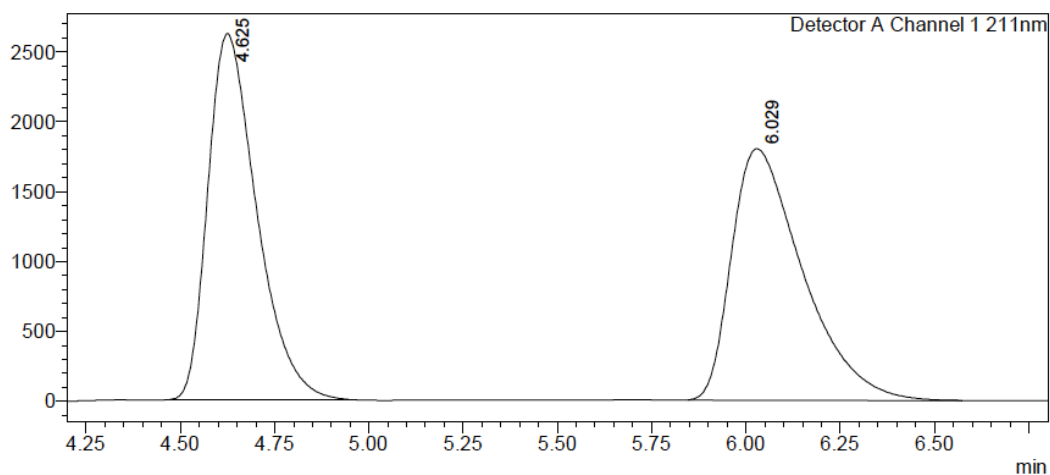

<Peak Table>

| Detector A Channel 1 211nm |           |         |
|----------------------------|-----------|---------|
| Peak#                      | Ret. Time | Area%   |
| 1                          | 4.625     | 50.048  |
| 2                          | 6.029     | 49.952  |
| Total                      |           | 100.000 |

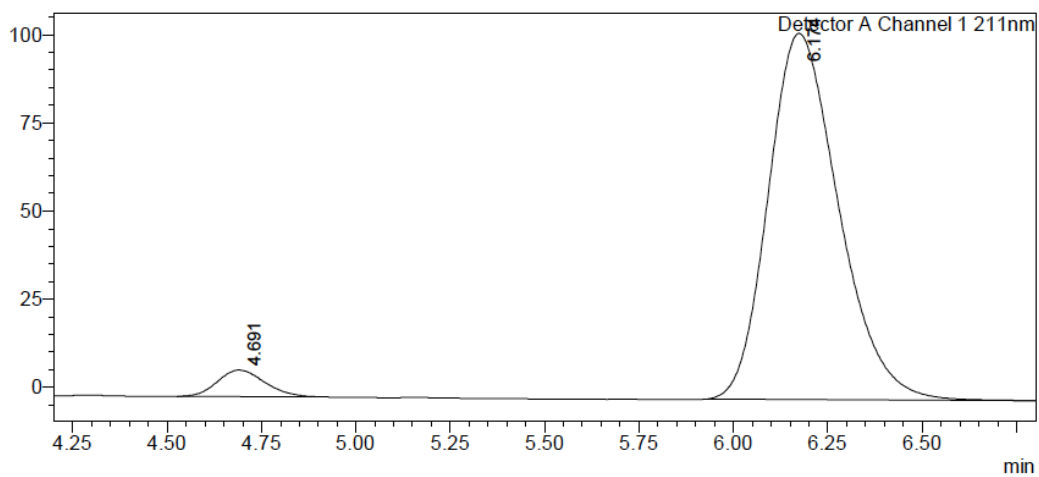

<Peak Table>

| Detector A Channel 1 211nm |           |         |
|----------------------------|-----------|---------|
| Peak#                      | Ret. Time | Area%   |
| 1                          | 4.691     | 4.627   |
| 2                          | 6.174     | 95.373  |
| Total                      |           | 100.000 |



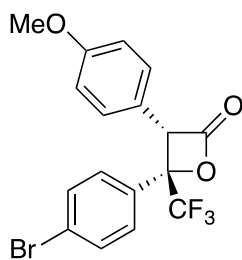

Chiralcel OD-H (97:3 Hexane:IPA, flow rate 1.5 mLmin<sup>-1</sup>, 211 nm, 40 °C)  $t_R(3R,4R)$ : 4.1 min,  $t_R(3S,4S)$ : 4.5 min, 92:8 er.

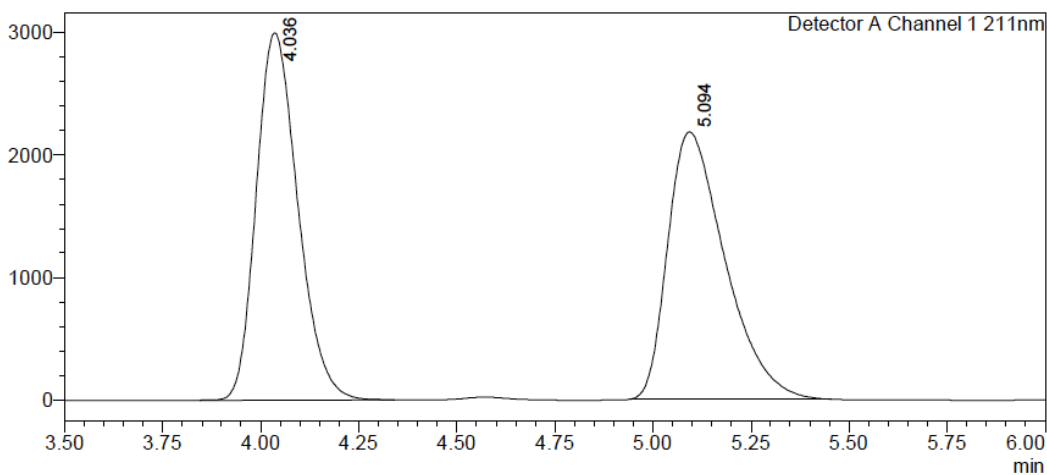

<Peak Table>

| Detector A Channel 1 211nm |           |         |
|----------------------------|-----------|---------|
| Peak#                      | Ret. Time | Area%   |
| 1                          | 4.036     | 49.896  |
| 2                          | 5.094     | 50.104  |
| Total                      |           | 100.000 |

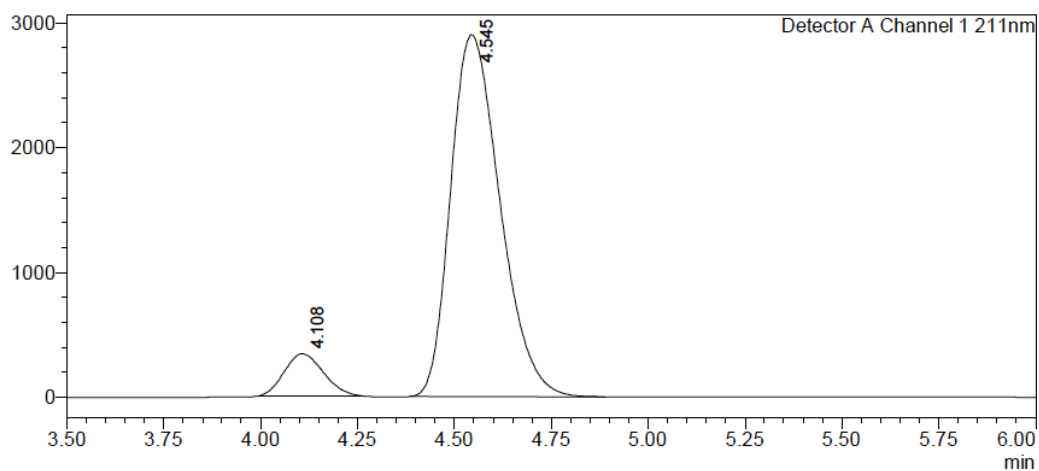

<Peak Table>

| Detector A Channel 1 211nm |           |         |
|----------------------------|-----------|---------|
| Peak#                      | Ret. Time | Area%   |
| 1                          | 4.108     | 8.491   |
| 2                          | 4.545     | 91.509  |
| Total                      |           | 100.000 |

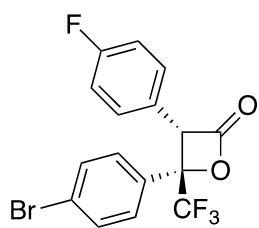

Chiralcel OD-H (97:3 Hexane:IPA, flow rate 1.5 mLmin<sup>-1</sup>, 211 nm, 40 °C)  $t_R(3R,4R)$ : 3.3 min,  $t_R(3S,4S)$ : 3.9 min, 96:4 er.

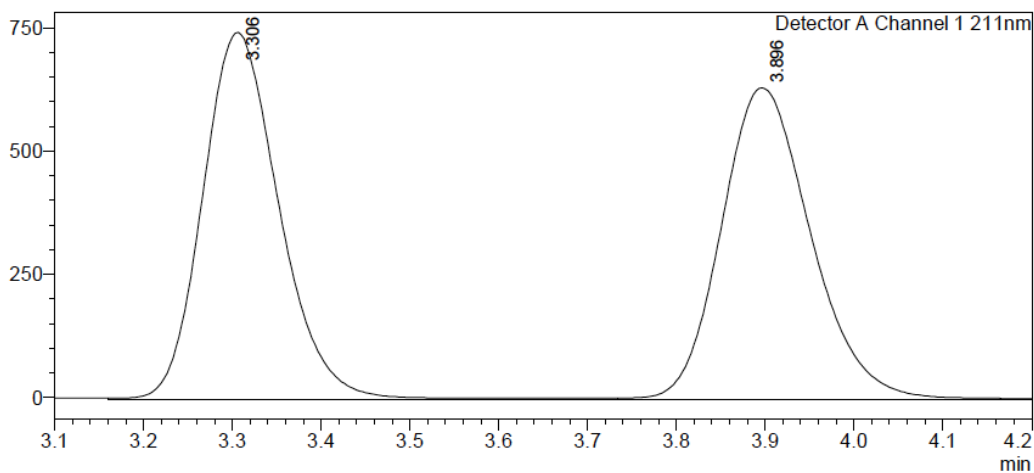

<Peak Table>

| Detector A Channel 1 211nm |           |         |
|----------------------------|-----------|---------|
| Peak#                      | Ret. Time | Area%   |
| 1                          | 3.306     | 50.075  |
| 2                          | 3.896     | 49.925  |
| Total                      |           | 100.000 |

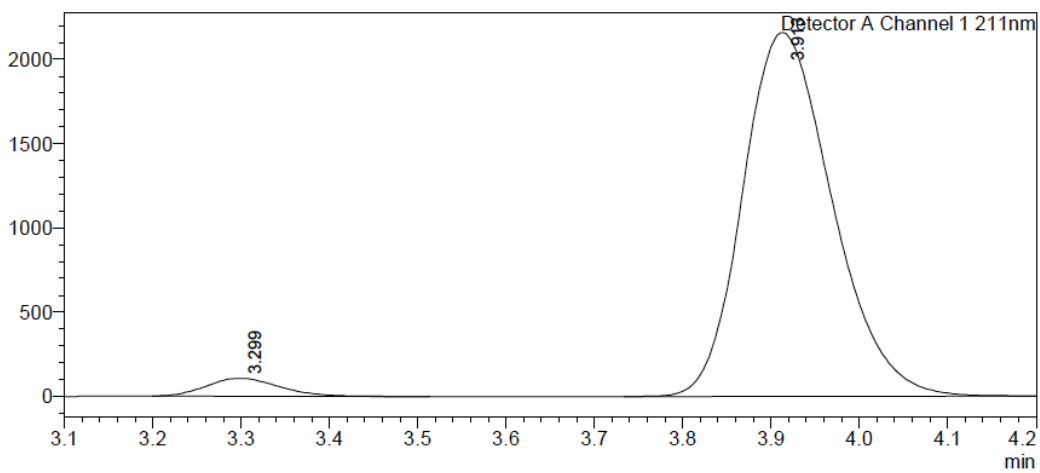

<Peak Table>

| Detector A Channel 1 211nm |           |         |
|----------------------------|-----------|---------|
| Peak#                      | Ret. Time | Area%   |
| 1                          | 3.299     | 3.835   |
| 2                          | 3.913     | 96.165  |
| Total                      |           | 100.000 |

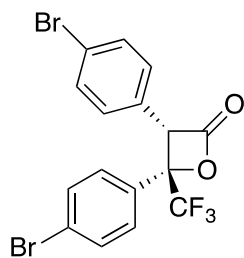

Chiralcel OD-H (97:3 Hexane:IPA, flow rate 1.5 mLmin<sup>-1</sup>, 211 nm, 40 °C)  $t_R(3R,4R)$ : 4.1 min,  $t_R(3S,4S)$ : 4.5 min, 91:9 er.

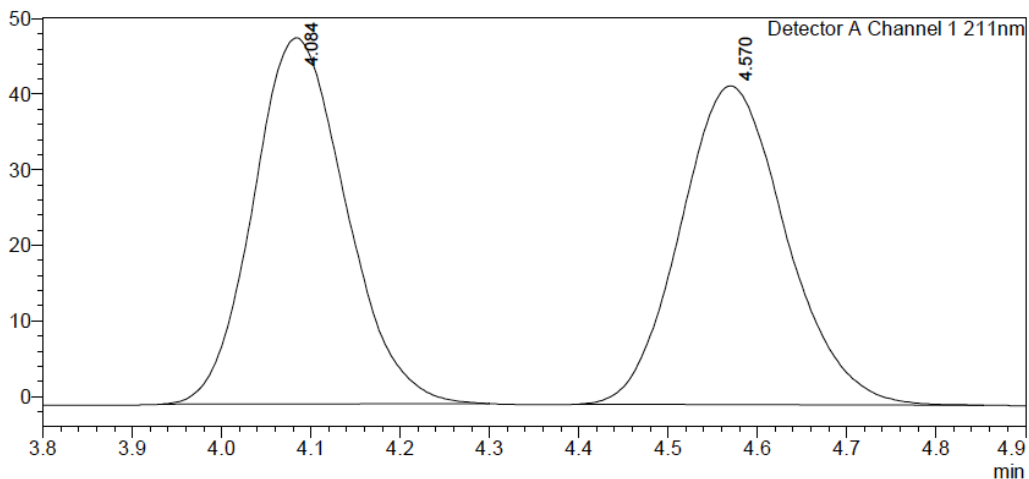

<Peak Table>

| Detector A Channel 1 211nm |           |         |
|----------------------------|-----------|---------|
| Peak#                      | Ret. Time | Area%   |
| 1                          | 4.084     | 50.160  |
| 2                          | 4.570     | 49.840  |
| Total                      |           | 100.000 |

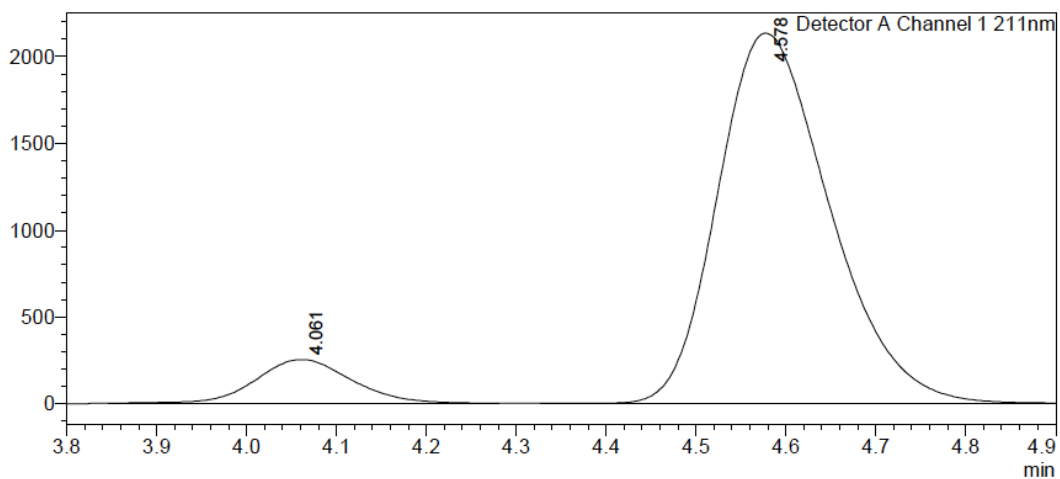

<Peak Table>

| Detector A Channel 1 211nm |           |         |
|----------------------------|-----------|---------|
| Peak#                      | Ret. Time | Area%   |
| 1                          | 4.061     | 9.202   |
| 2                          | 4.578     | 90.798  |
| Total                      |           | 100.000 |

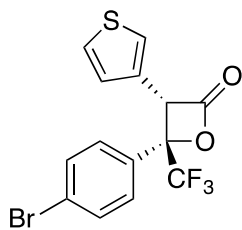

Chiralcel OD-H (97:3 Hexane:IPA, flow rate 1.5 mLmin<sup>-1</sup>, 211 nm, 40 °C)  $t_R(3R,4R)$ : 3.9 min,  $t_R(3S,4S)$ : 4.7 min, 95:5 er.

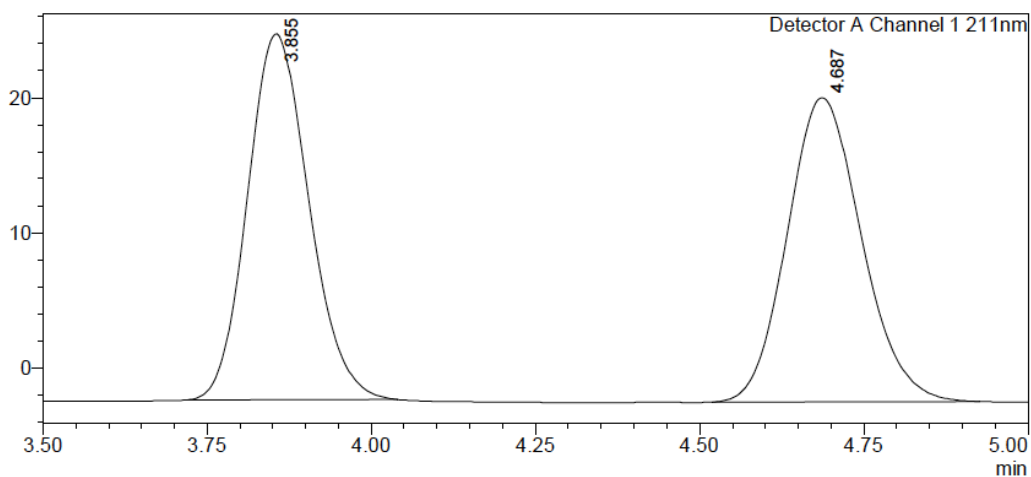

**<Peak Table>**

Detector A Channel 1 211nm

| Peak# | Ret. Time | Area%   |
|-------|-----------|---------|
| 1     | 3.855     | 49.869  |
| 2     | 4.687     | 50.131  |
| Total |           | 100.000 |

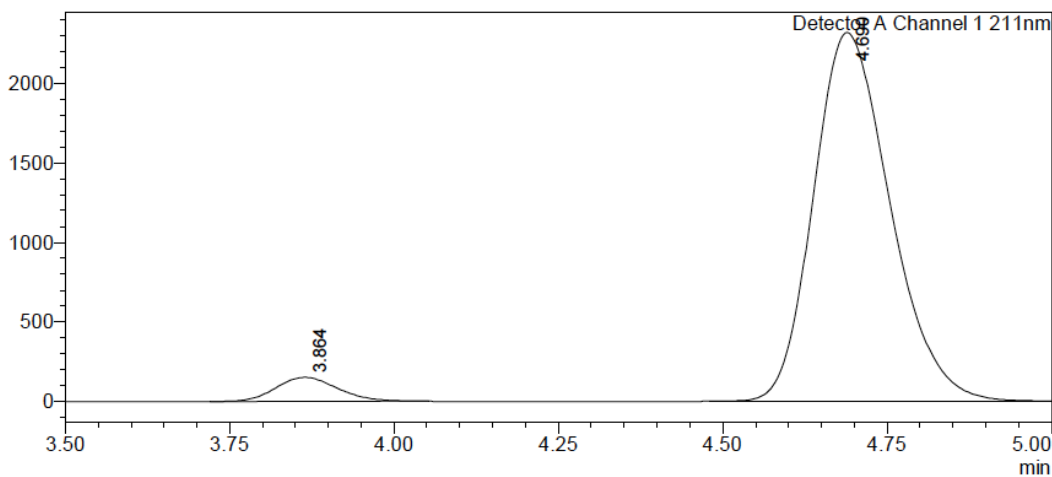

**<Peak Table>**

Detector A Channel 1 211nm

| Peak# | Ret. Time | Area%   |
|-------|-----------|---------|
| 1     | 3.864     | 5.012   |
| 2     | 4.690     | 94.988  |
| Total |           | 100.000 |

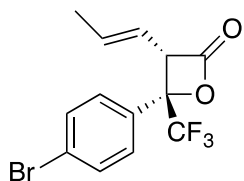

Chiralpak AD-H (99:1 Hexane:IPA, flow rate 1.5 mLmin<sup>-1</sup>, 211 nm, 40 °C)  $t_R(3S,4S)$ : 3.2 min,  $t_R(3R,4R)$ : 3.5 min, 98:2 er.

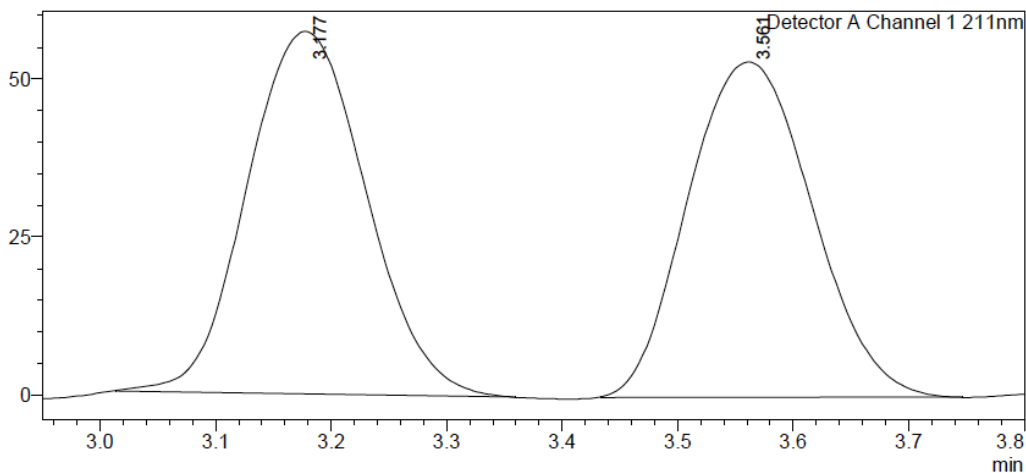

<Peak Table>

| Detector A Channel 1 211nm |           |         |
|----------------------------|-----------|---------|
| Peak#                      | Ret. Time | Area%   |
| 1                          | 3.177     | 50.832  |
| 2                          | 3.561     | 49.168  |
| Total                      |           | 100.000 |

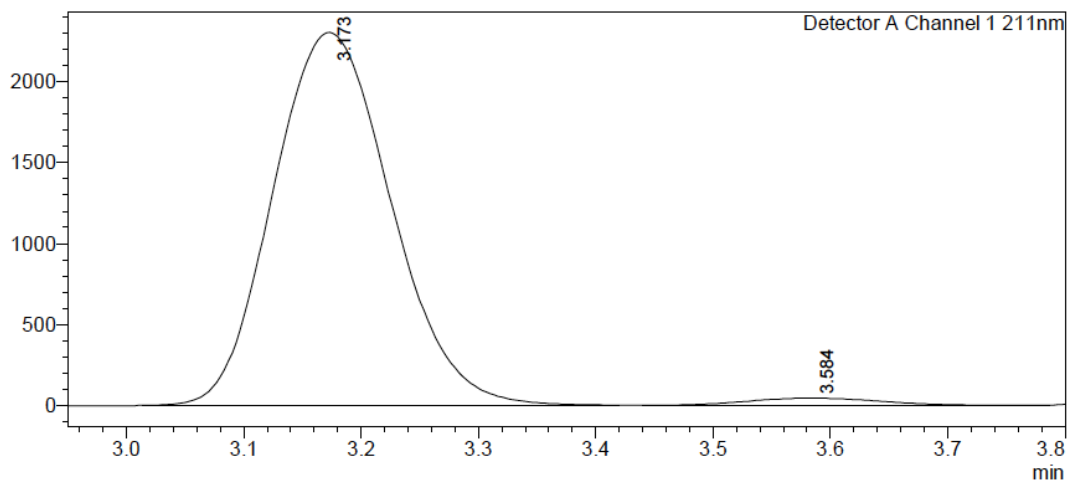

<Peak Table>

| Detector A Channel 1 211nm |           |         |
|----------------------------|-----------|---------|
| Peak#                      | Ret. Time | Area%   |
| 1                          | 3.173     | 97.934  |
| 2                          | 3.584     | 2.066   |
| Total                      |           | 100.000 |

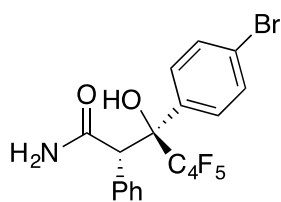

Chiralcel OD-H (95:5 hexane:IPA, flow rate 1.5 mLmin<sup>-1</sup>, 211 nm, 40 °C)  $t_R(2R,3R)$ : 11.3 min,  $t_R(2S,3S)$ : 22.2 min, 97:3 er.

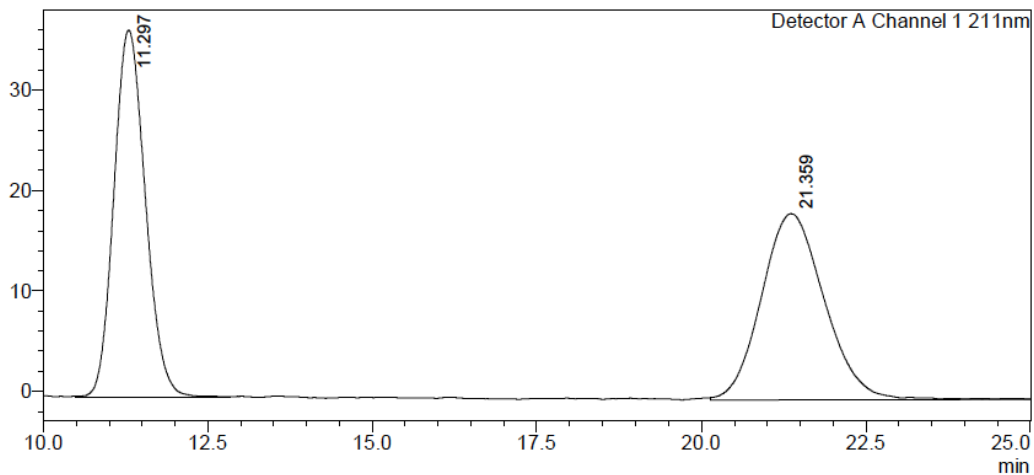

<Peak Table>

| Detector A Channel 1 211nm |           |         |
|----------------------------|-----------|---------|
| Peak#                      | Ret. Time | Area%   |
| 1                          | 11.297    | 49.856  |
| 2                          | 21.359    | 50.144  |
| Total                      |           | 100.000 |

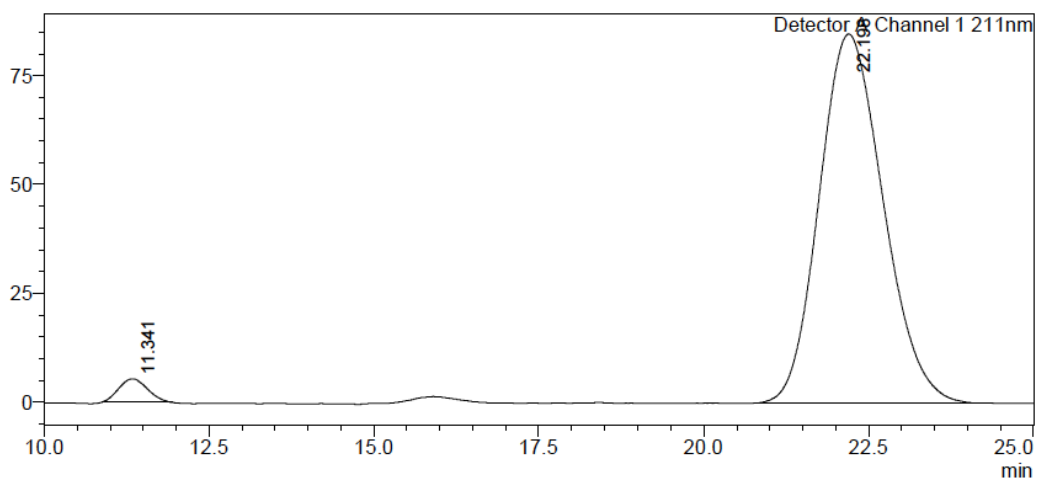

<Peak Table>

| Detector A Channel 1 211nm |           |         |
|----------------------------|-----------|---------|
| Peak#                      | Ret. Time | Area%   |
| 1                          | 11.341    | 2.768   |
| 2                          | 22.198    | 97.232  |
| Total                      |           | 100.000 |

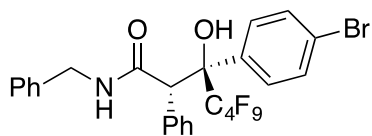

Chiralpak AD-H (97:3 hexane:IPA, flow rate 1.5 mLmin<sup>-1</sup>, 211 nm, 40 °C)  $t_R(2R,3R)$ : 7.3 min,  $t_R(2S,3S)$ : 19.4 min, 94:6 er.

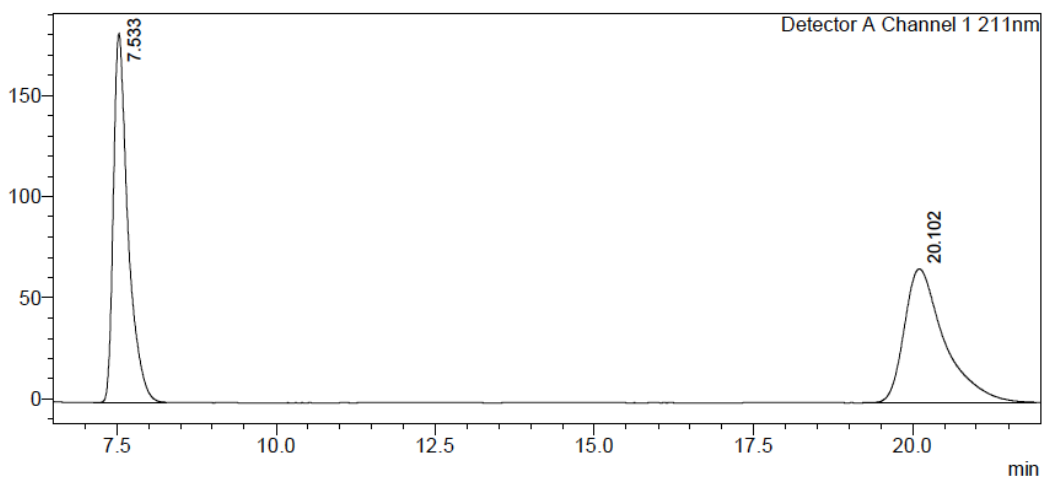

<Peak Table>

| Detector A Channel 1 211nm |           |         |
|----------------------------|-----------|---------|
| Peak#                      | Ret. Time | Area%   |
| 1                          | 7.533     | 50.150  |
| 2                          | 20.102    | 49.850  |
| Total                      |           | 100.000 |

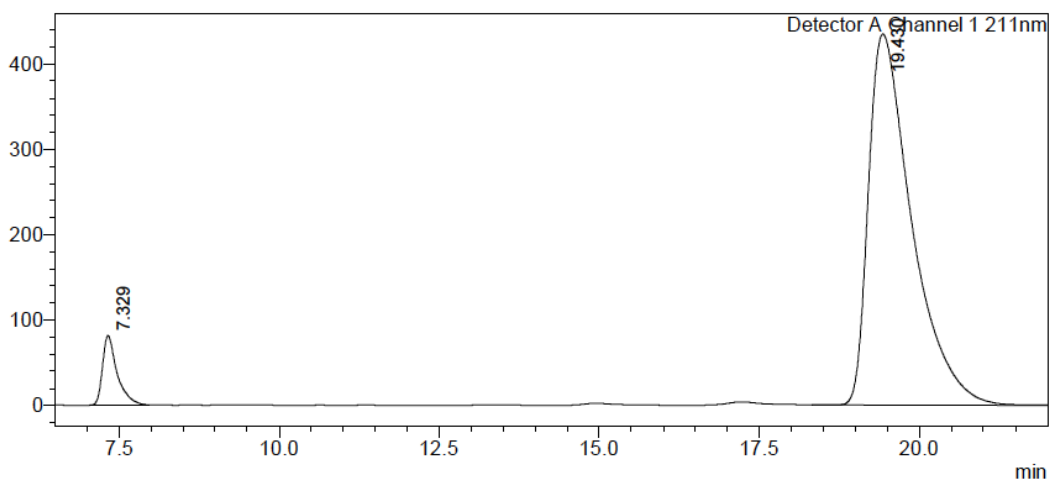

<Peak Table>

| Detector A Channel 1 211nm |           |         |
|----------------------------|-----------|---------|
| Peak#                      | Ret. Time | Area%   |
| 1                          | 7.329     | 5.912   |
| 2                          | 19.430    | 94.088  |
| Total                      |           | 100.000 |

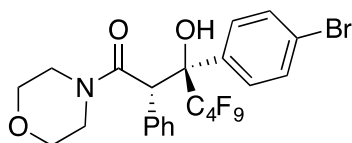

Chiralpak AD-H (97:3 hexane:IPA, flow rate 1.5 mLmin<sup>-1</sup>, 211 nm, 40 °C)  $t_R(2R,3R)$ : 4.6 min,  $t_R(2S,3S)$ : 5.2 min, 98:2 er.

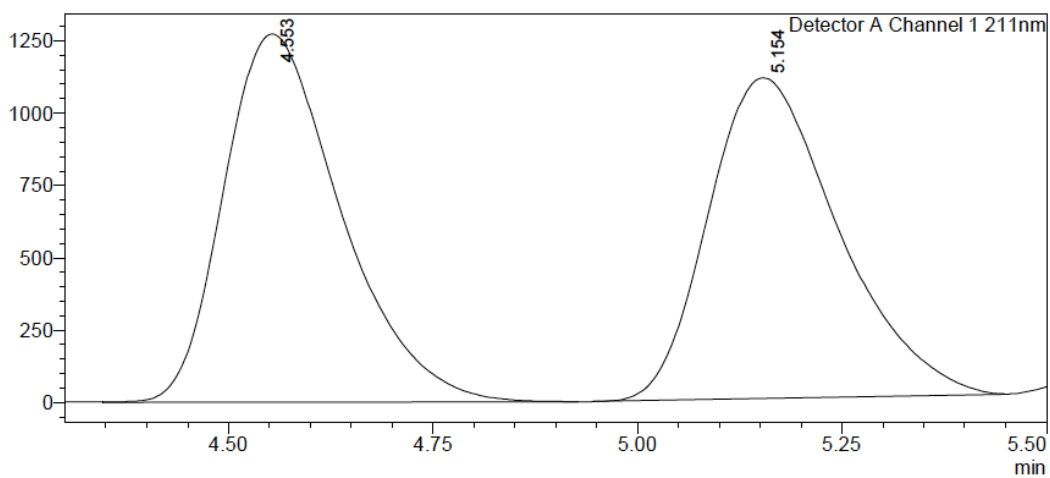

<Peak Table>

| Detector A Channel 1 211nm |           |         |
|----------------------------|-----------|---------|
| Peak#                      | Ret. Time | Area%   |
| 1                          | 4.553     | 50.857  |
| 2                          | 5.154     | 49.143  |
| Total                      |           | 100.000 |

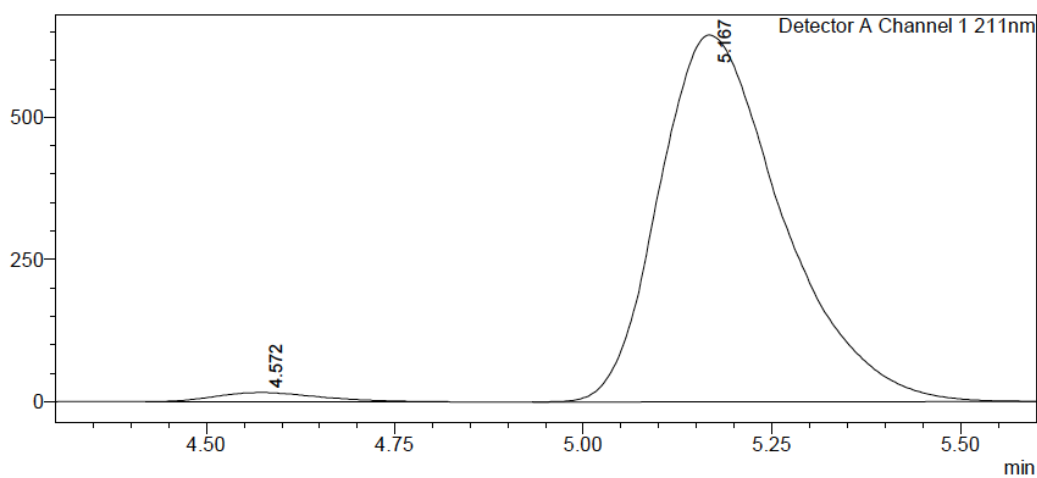

<Peak Table>

| Detector A Channel 1 211nm |           |         |
|----------------------------|-----------|---------|
| Peak#                      | Ret. Time | Area%   |
| 1                          | 4.572     | 2.064   |
| 2                          | 5.167     | 97.936  |
| Total                      |           | 100.000 |



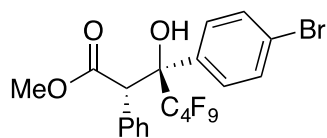

Chiralpak AD-H (99:1 hexane:IPA, flow rate 1.5 mLmin<sup>-1</sup>, 211 nm, 40 °C)  $t_R(2S,3S)$ : 3.2 min,  $t_R(2R,3R)$ : 3.8 min, 98:2 er.

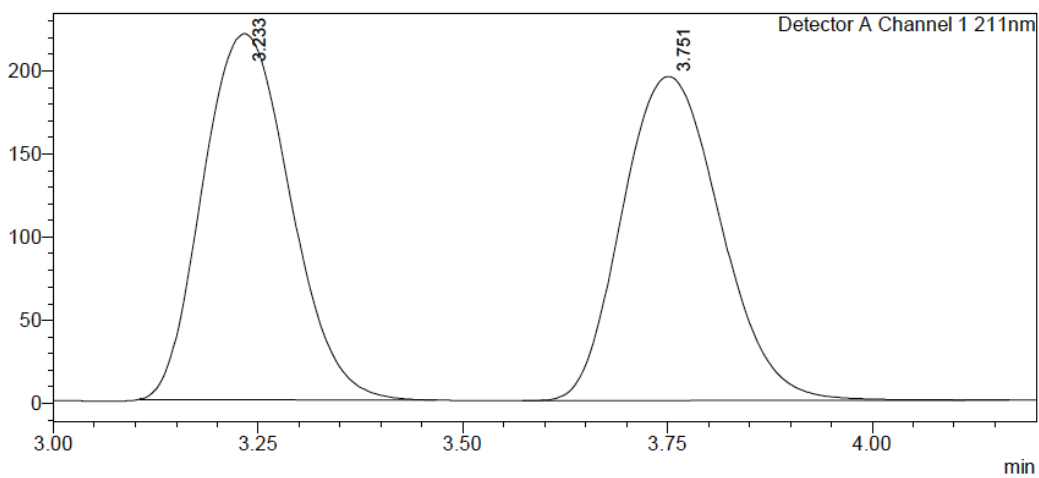

**<Peak Table>**

| Detector A Channel 1 211nm |           |         |
|----------------------------|-----------|---------|
| Peak#                      | Ret. Time | Area%   |
| 1                          | 3.233     | 50.176  |
| 2                          | 3.751     | 49.824  |
| Total                      |           | 100.000 |

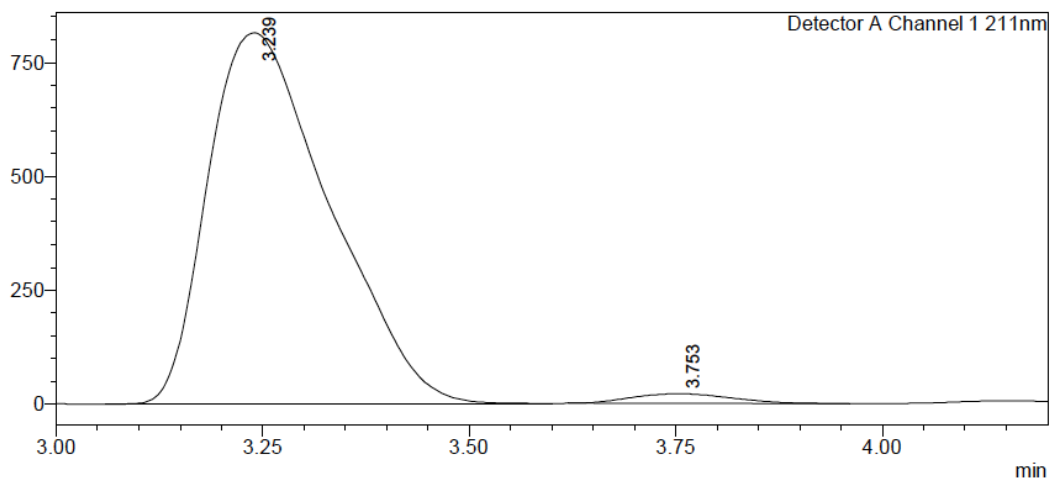

**<Peak Table>**

| Detector A Channel 1 211nm |           |         |
|----------------------------|-----------|---------|
| Peak#                      | Ret. Time | Area%   |
| 1                          | 3.239     | 97.901  |
| 2                          | 3.753     | 2.099   |
| Total                      |           | 100.000 |

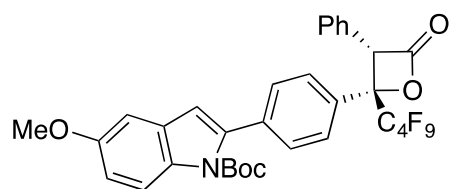

Chiralcel OD-H (97:3 Hexane:IPA, flow rate 1.5 mLmin<sup>-1</sup>, 211 nm, 40 °C)  $t_R(2R,3R)$ : 3.7 min,  $t_R(2S,3S)$ : 4.8 min, 97:3 er.

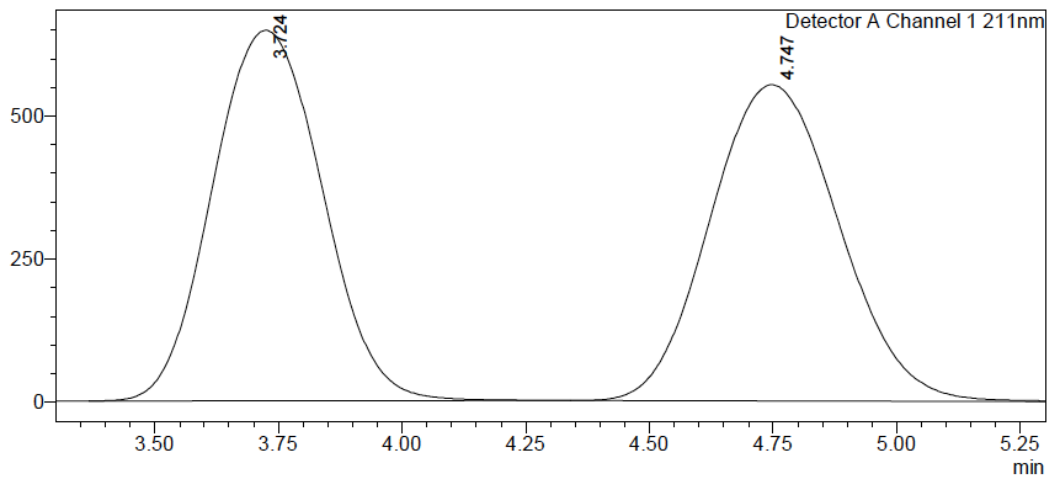

**<Peak Table>**

| Detector A Channel 1 211nm |           |         |
|----------------------------|-----------|---------|
| Peak#                      | Ret. Time | Area%   |
| 1                          | 3.724     | 49.924  |
| 2                          | 4.747     | 50.076  |
| Total                      |           | 100.000 |

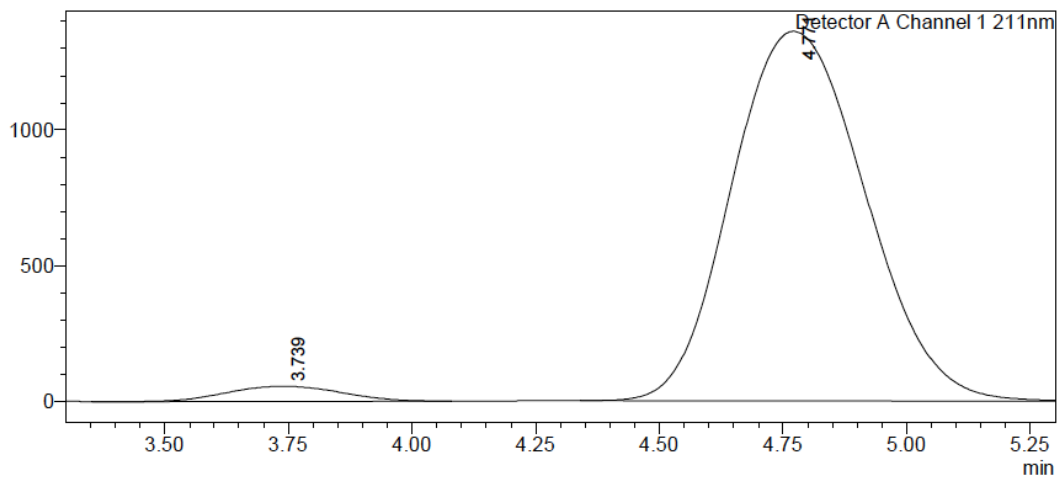

**<Peak Table>**

| Detector A Channel 1 211nm |           |         |
|----------------------------|-----------|---------|
| Peak#                      | Ret. Time | Area%   |
| 1                          | 3.739     | 3.349   |
| 2                          | 4.771     | 96.651  |
| Total                      |           | 100.000 |

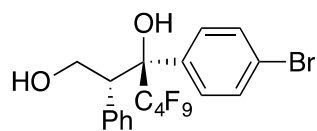

Chiralcel OD-H (97:3 Hexane:IPA, flow rate 1.5 mLmin<sup>-1</sup>, 211 nm, 40 °C)  $t_r(2S,3R)$ : 16.7 min,  $t_r(2R,3S)$ : 26.5 min, 97:3 er.

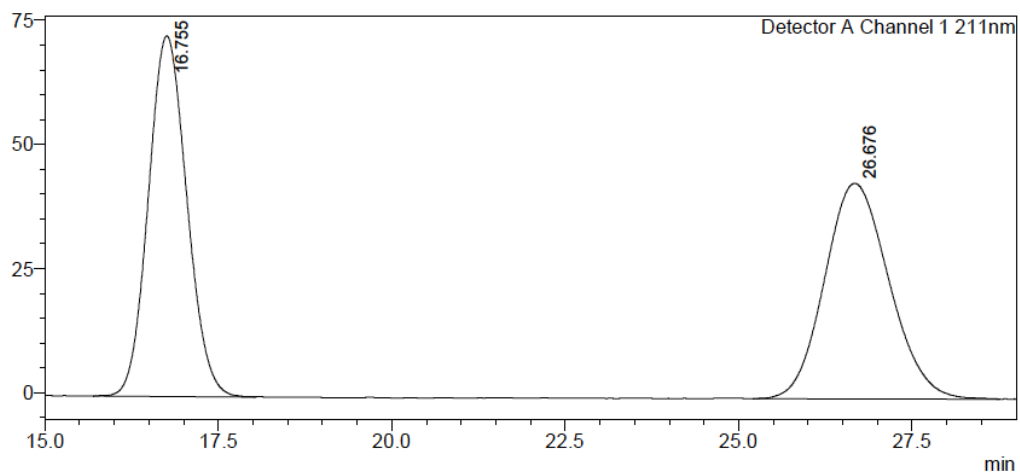

<Peak Table>

| Detector A Channel 1 211nm |           |         |
|----------------------------|-----------|---------|
| Peak#                      | Ret. Time | Area%   |
| 1                          | 16.755    | 50.002  |
| 2                          | 26.676    | 49.998  |
| Total                      |           | 100.000 |

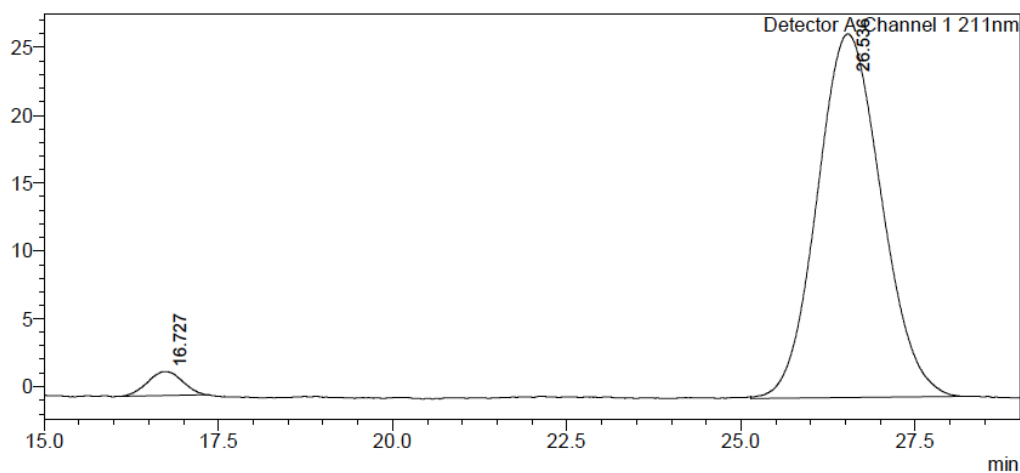

<Peak Table>

| Detector A Channel 1 211nm |           |         |
|----------------------------|-----------|---------|
| Peak#                      | Ret. Time | Area%   |
| 1                          | 16.727    | 3.449   |
| 2                          | 26.536    | 96.551  |
| Total                      |           | 100.000 |

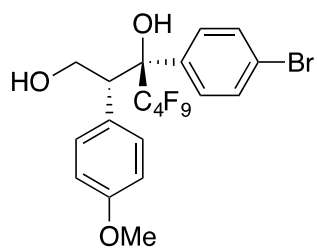

Chiralcel OD-H (97:3 Hexane:IPA, flow rate 1.5 mLmin<sup>-1</sup>, 211 nm, 40 °C)  $t_r(2R,3S)$ : 8.3 min,  $t_r(2S,3R)$ : 10.8 min, 97:3 er.

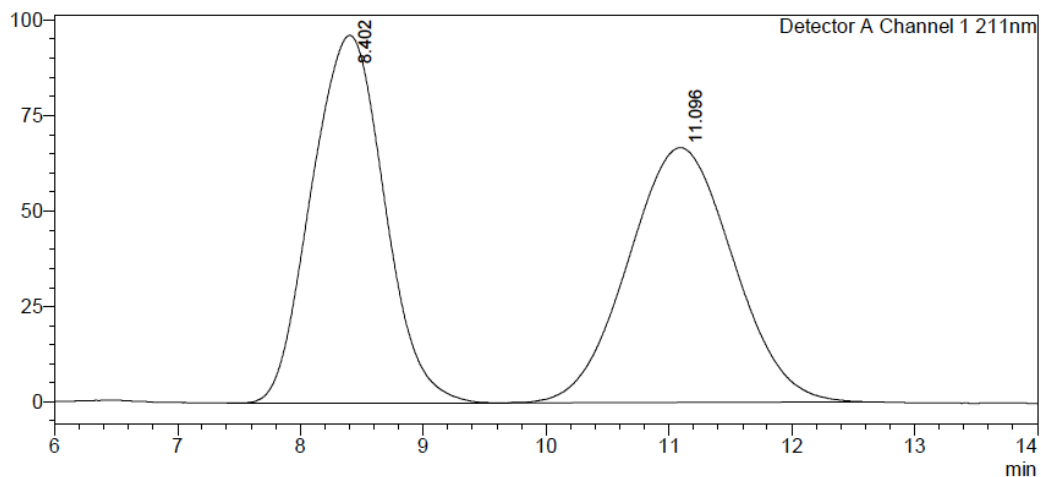

<Peak Table>

| Detector A Channel 1 211nm |           |         |
|----------------------------|-----------|---------|
| Peak#                      | Ret. Time | Area%   |
| 1                          | 8.402     | 50.027  |
| 2                          | 11.096    | 49.973  |
| Total                      |           | 100.000 |

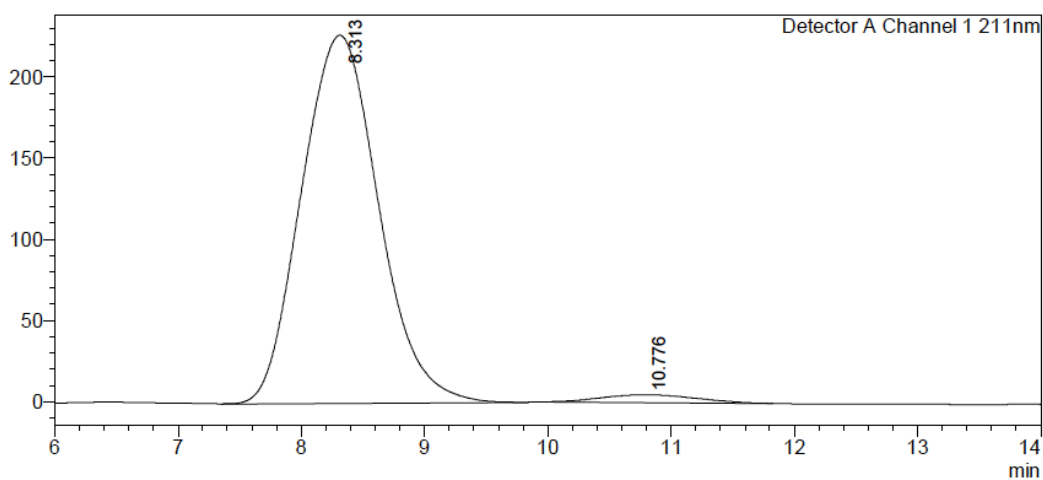

<Peak Table>

| Detector A Channel 1 211nm |           |         |
|----------------------------|-----------|---------|
| Peak#                      | Ret. Time | Area%   |
| 1                          | 8.313     | 97.345  |
| 2                          | 10.776    | 2.655   |
| Total                      |           | 100.000 |

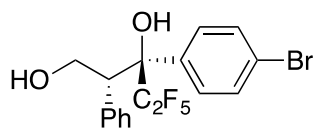

Chiralcel OD-H (97:3 Hexane:IPA, flow rate 1.5 mLmin<sup>-1</sup>, 211 nm, 40 °C)  $t_R(2S,3R)$ : 20.9 min,  $t_R(2R,3S)$ : 30.7 min, 94:6 er.

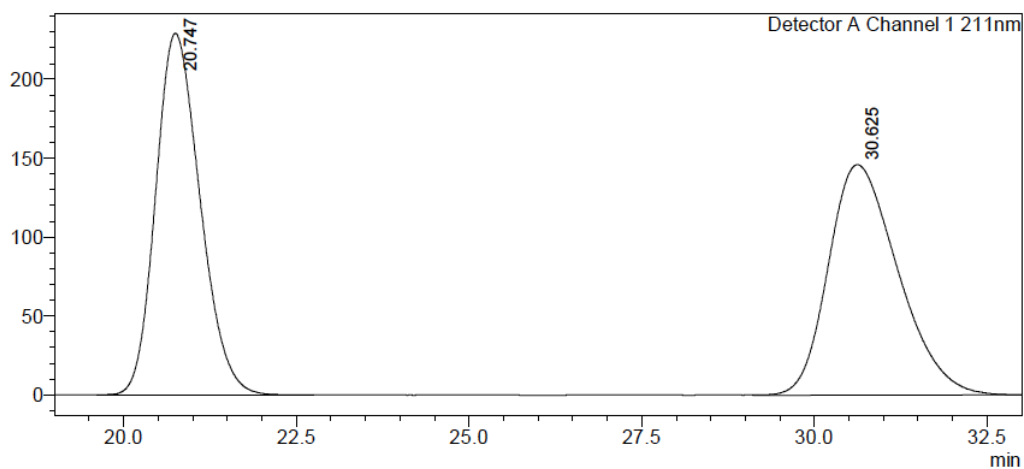

**<Peak Table>**

Detector A Channel 1 211nm

| Peak# | Ret. Time | Area%   |
|-------|-----------|---------|
| 1     | 20.747    | 50.036  |
| 2     | 30.625    | 49.964  |
| Total |           | 100.000 |

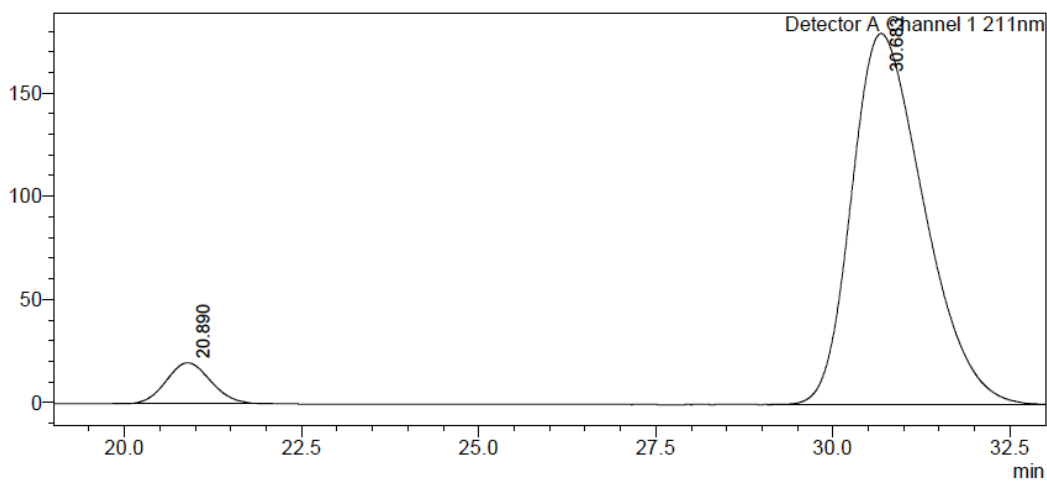

**<Peak Table>**

Detector A Channel 1 211nm

| Peak# | Ret. Time | Area%   |
|-------|-----------|---------|
| 1     | 20.890    | 6.443   |
| 2     | 30.683    | 93.557  |
| Total |           | 100.000 |

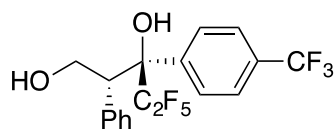

Chiralpak IC (99:1 Hexane:IPA, flow rate 1.5 mLmin<sup>-1</sup>, 211 nm, 40 °C)  $t_R(2S,3R)$ : 3.9 min,  $t_R(2R,3S)$ : 4.7 min, 95:5 er.

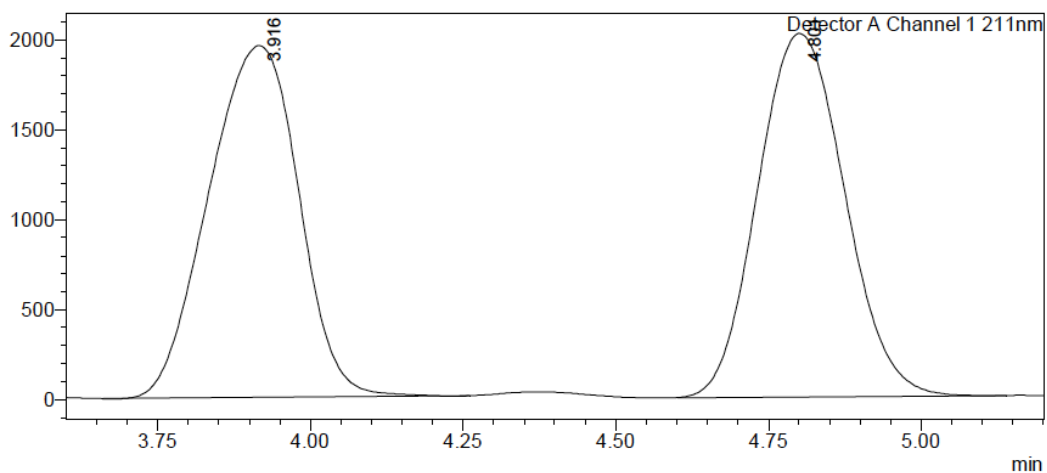

**<Peak Table>**

| Detector A Channel 1 211nm |           |         |
|----------------------------|-----------|---------|
| Peak#                      | Ret. Time | Area%   |
| 1                          | 3.916     | 50.084  |
| 2                          | 4.801     | 49.916  |
| Total                      |           | 100.000 |

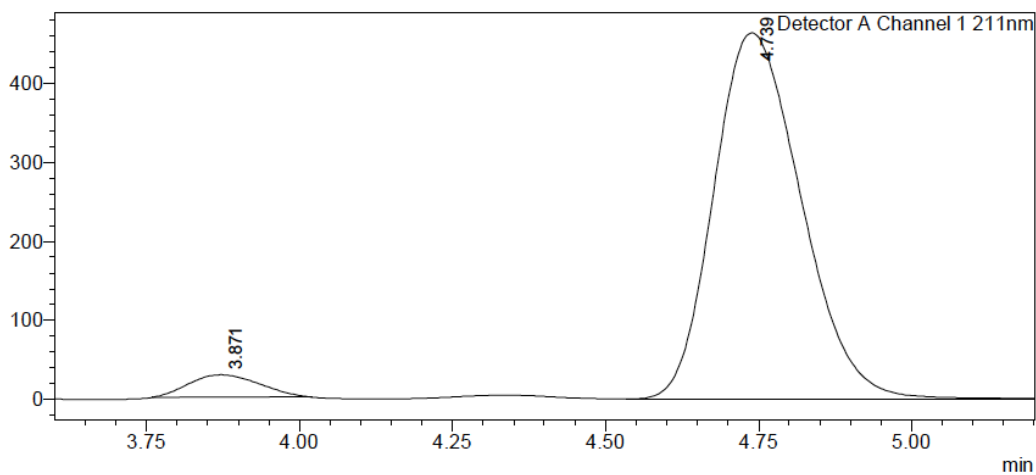

**<Peak Table>**

| Detector A Channel 1 211nm |           |         |
|----------------------------|-----------|---------|
| Peak#                      | Ret. Time | Area%   |
| 1                          | 3.871     | 4.733   |
| 2                          | 4.739     | 95.267  |
| Total                      |           | 100.000 |

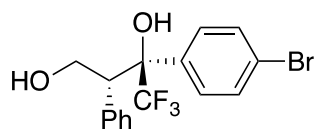

Chiralpak IC (97:3 Hexane:IPA, flow rate 1.5 mLmin<sup>-1</sup>, 211 nm, 40 °C)  $t_R(2S,3R)$ : 4.7 min,  $t_R(2R,3S)$ : 5.8 min, 94:6 er.

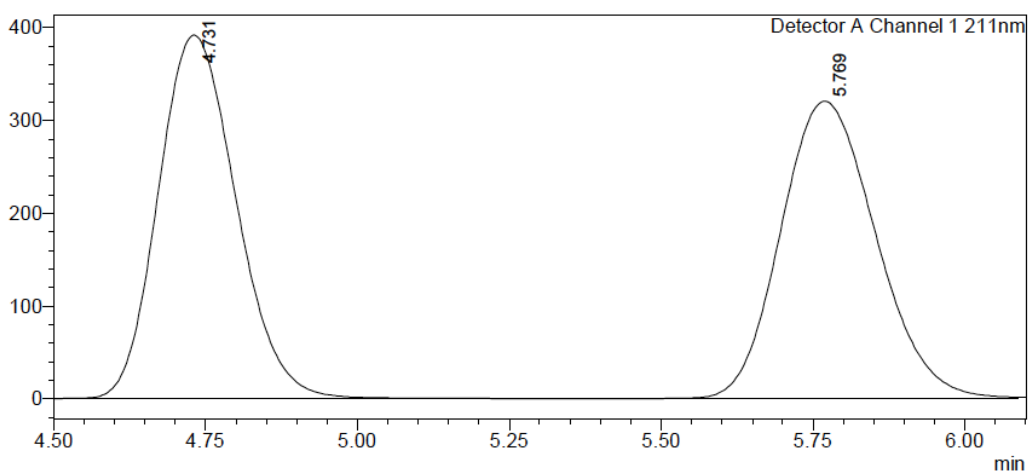

<Peak Table>

| Detector A Channel 1 211nm |           |         |
|----------------------------|-----------|---------|
| Peak#                      | Ret. Time | Area%   |
| 1                          | 4.731     | 50.108  |
| 2                          | 5.769     | 49.892  |
| Total                      |           | 100.000 |

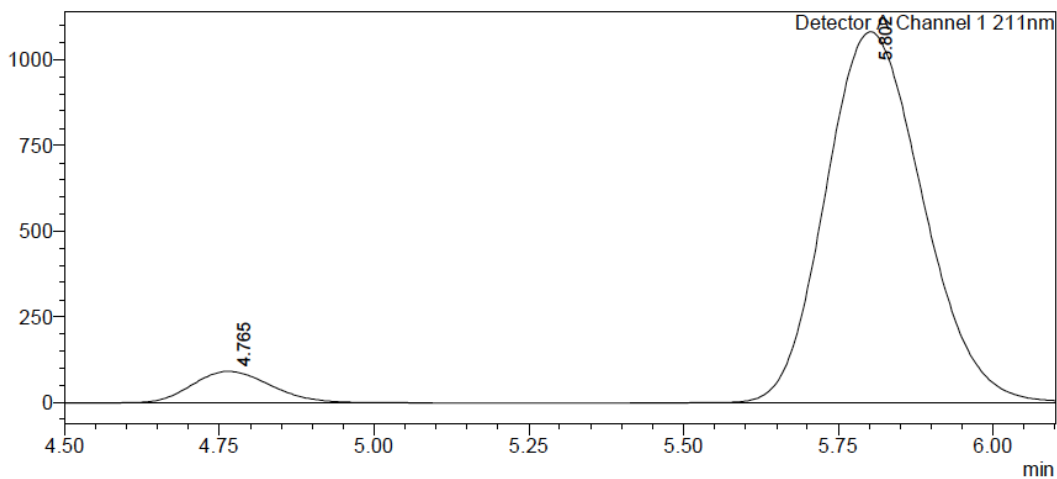

<Peak Table>

| Detector A Channel 1 211nm |           |         |
|----------------------------|-----------|---------|
| Peak#                      | Ret. Time | Area%   |
| 1                          | 4.765     | 6.430   |
| 2                          | 5.802     | 93.570  |
| Total                      |           | 100.000 |

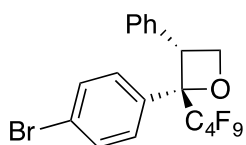

Chiralcel OD-H (97:3 Hexane:IPA, flow rate 1.5 mLmin<sup>-1</sup>, 211 nm, 40 °C)  $t_R(2S,3R)$ : 3.5 min,  $t_R(2R,3S)$ : 6.3 min, 97:3 er.

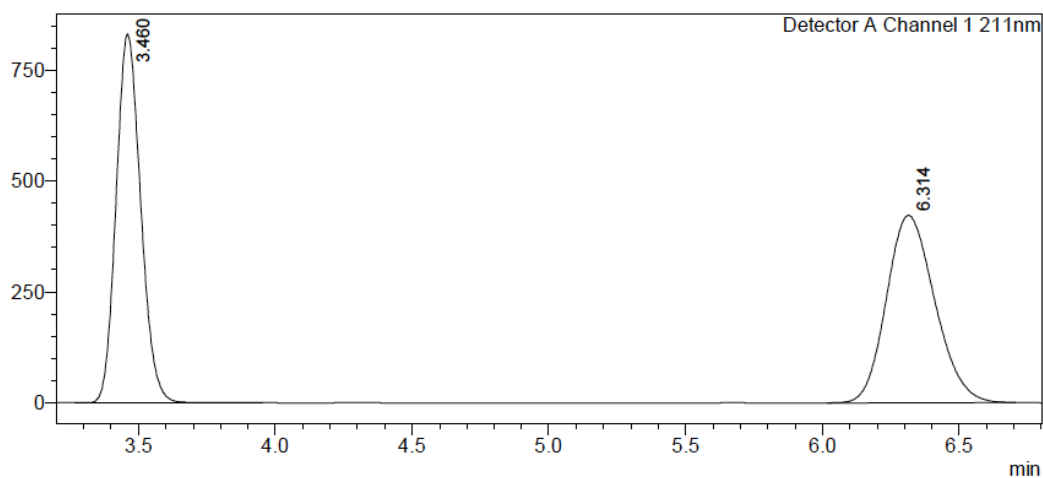

<Peak Table>

| Detector A Channel 1 211nm |           |         |
|----------------------------|-----------|---------|
| Peak#                      | Ret. Time | Area%   |
| 1                          | 3.460     | 49.982  |
| 2                          | 6.314     | 50.018  |
| Total                      |           | 100.000 |

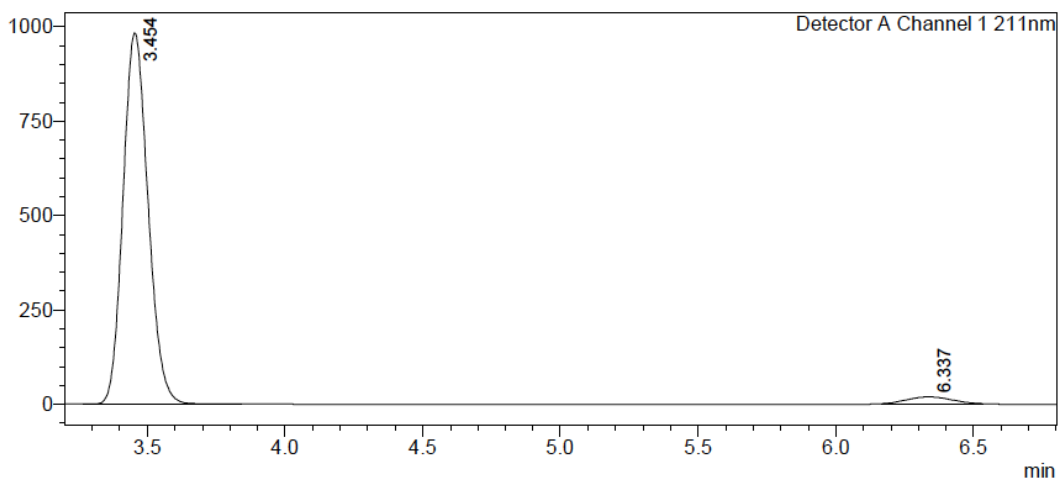

<Peak Table>

| Detector A Channel 1 211nm |           |         |
|----------------------------|-----------|---------|
| Peak#                      | Ret. Time | Area%   |
| 1                          | 3.454     | 96.886  |
| 2                          | 6.337     | 3.114   |
| Total                      |           | 100.000 |



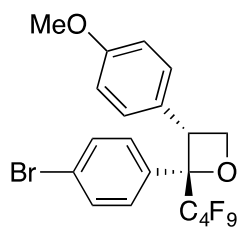

Chiralcel OD-H (97:3 Hexane:IPA, flow rate 1.5 mLmin<sup>-1</sup>, 211 nm, 40 °C)  $t_r(2S,3R)$ : 3.7 min,  $t_r(2R,3S)$ : 5.1 min, 97:3 er.

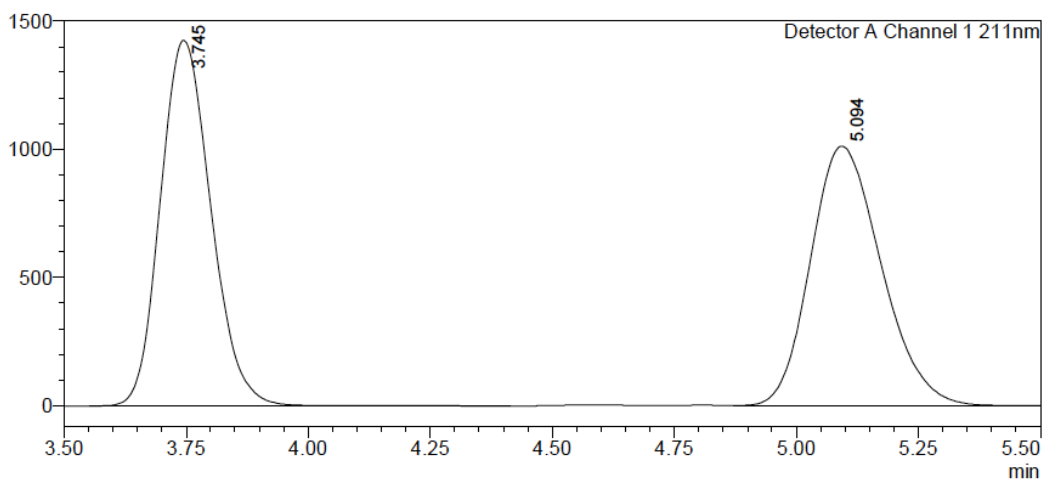

**<Peak Table>**

Detector A Channel 1 211nm

| Peak# | Ret. Time | Area%   |
|-------|-----------|---------|
| 1     | 3.745     | 50.011  |
| 2     | 5.094     | 49.989  |
| Total |           | 100.000 |

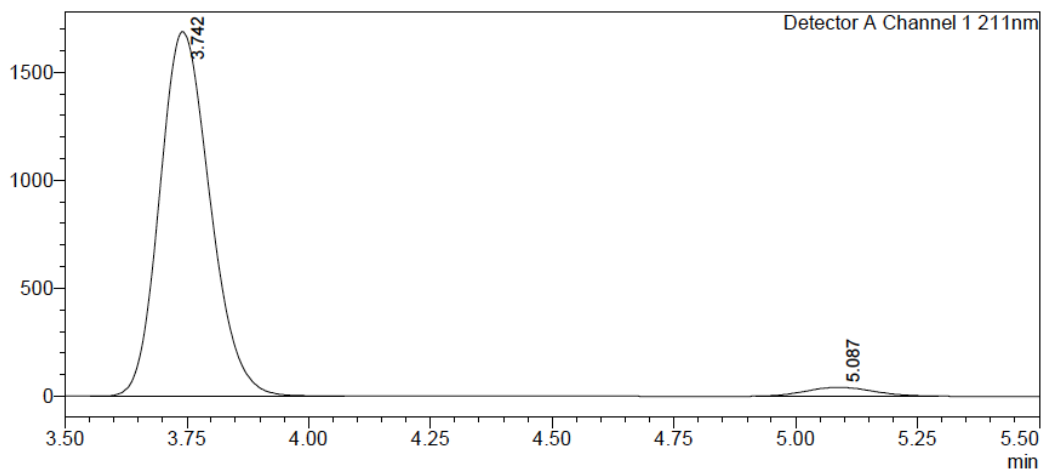

**<Peak Table>**

Detector A Channel 1 211nm

| Peak# | Ret. Time | Area%   |
|-------|-----------|---------|
| 1     | 3.742     | 96.863  |
| 2     | 5.087     | 3.137   |
| Total |           | 100.000 |

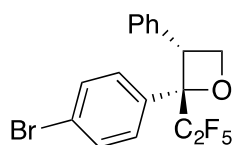

Chiralcel OD-H (97:3 Hexane:IPA, flow rate 1.5 mLmin<sup>-1</sup>, 211 nm, 40 °C)

$t_R(2S,3R)$ : 4.2 min,  $t_R(2R,3S)$ : 6.2 min, 94:6 er.

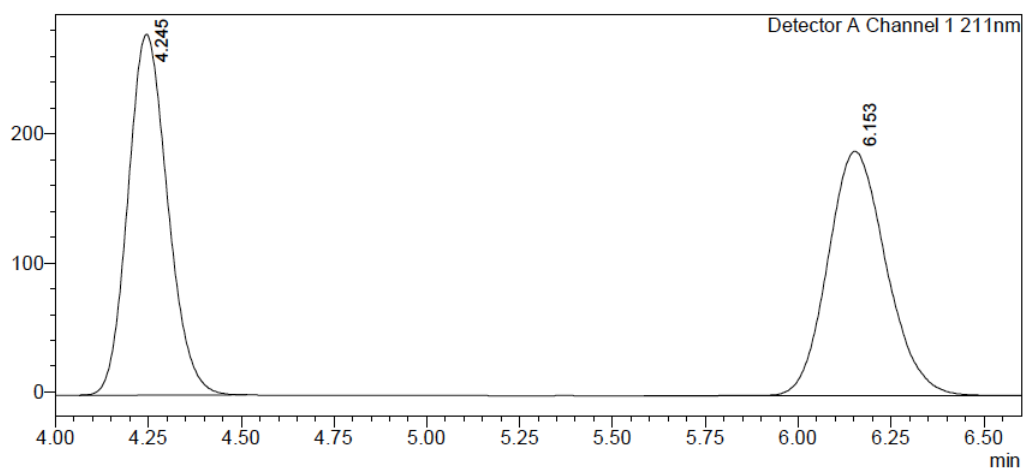

<Peak Table>

| Detector A Channel 1 211nm |           |         |
|----------------------------|-----------|---------|
| Peak#                      | Ret. Time | Area%   |
| 1                          | 4.245     | 50.109  |
| 2                          | 6.153     | 49.891  |
| Total                      |           | 100.000 |

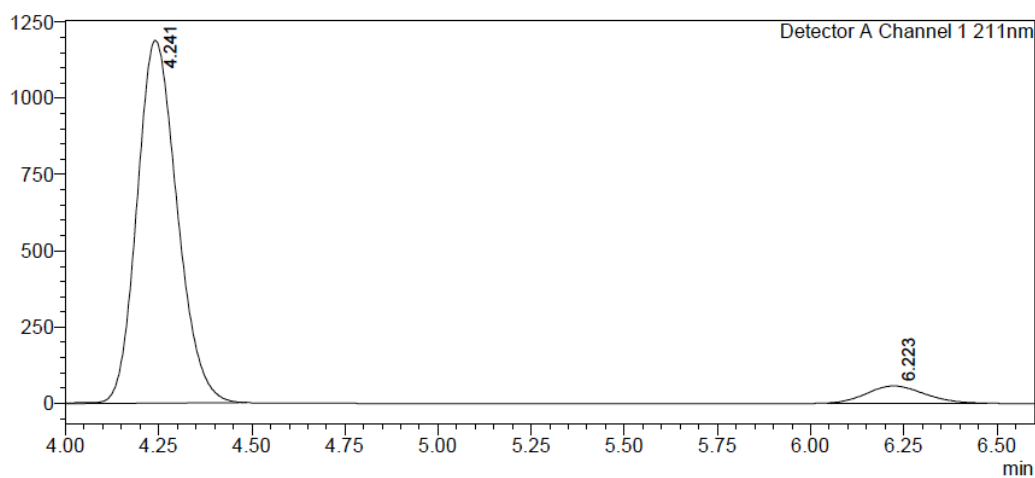

<Peak Table>

| Detector A Channel 1 211nm |           |         |
|----------------------------|-----------|---------|
| Peak#                      | Ret. Time | Area%   |
| 1                          | 4.241     | 93.734  |
| 2                          | 6.223     | 6.266   |
| Total                      |           | 100.000 |

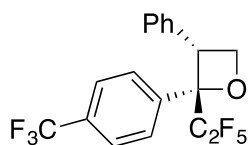

Chiralcel OD-H (97:3 Hexane:IPA, flow rate 1.5 mLmin<sup>-1</sup>, 211 nm, 40 °C)  $t_R(2S,3R)$ : 4.2 min,  $t_R(2R,3S)$ : 6.0 min, 95:5 er.

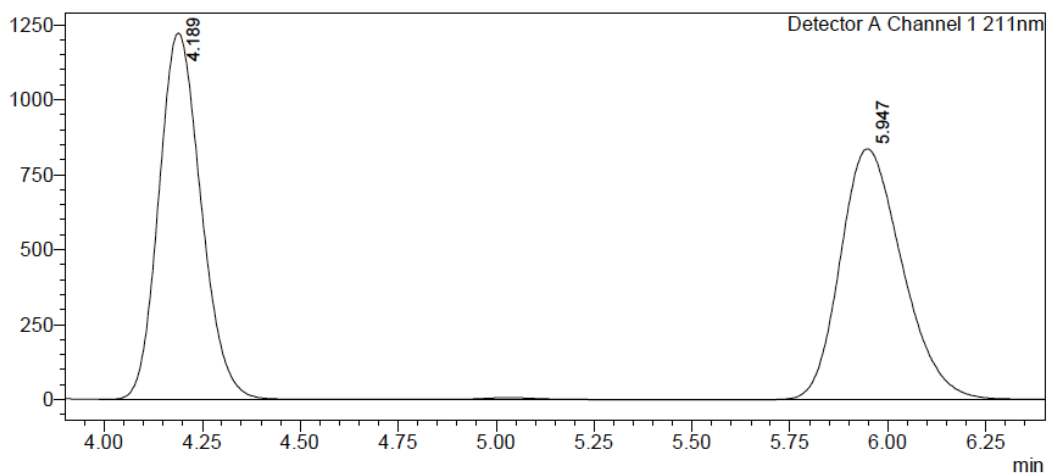

<Peak Table>

| Detector A Channel 1 211nm |           |         |
|----------------------------|-----------|---------|
| Peak#                      | Ret. Time | Area%   |
| 1                          | 4.189     | 49.911  |
| 2                          | 5.947     | 50.089  |
| Total                      |           | 100.000 |

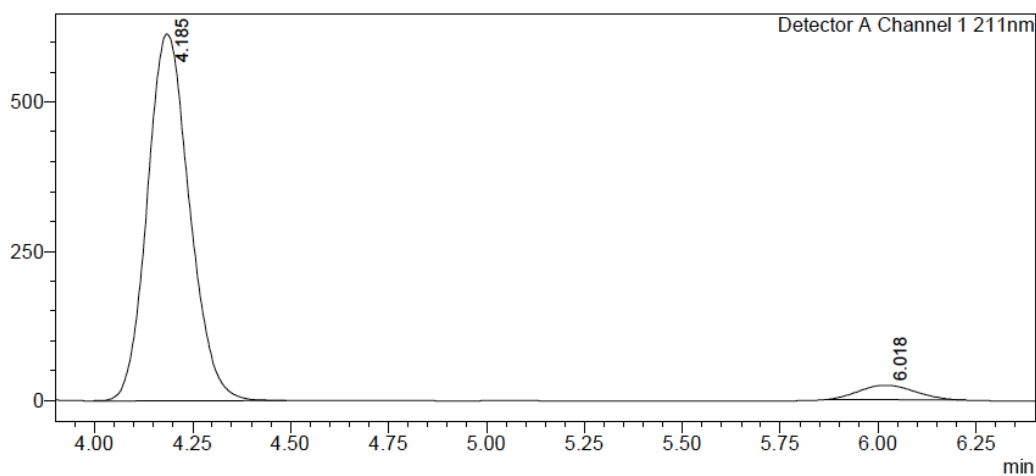

<Peak Table>

| Detector A Channel 1 211nm |           |         |
|----------------------------|-----------|---------|
| Peak#                      | Ret. Time | Area%   |
| 1                          | 4.185     | 94.935  |
| 2                          | 6.018     | 5.065   |
| Total                      |           | 100.000 |

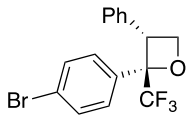

Chiralcel OD-H (97:3 Hexane:IPA, flow rate 1.5 mLmin<sup>-1</sup>, 211 nm, 40 °C)

$t_R(2S,3R)$ : 4.1 min,  $t_R(2R,3S)$ : 6.7 min, 94:6 er.

mV

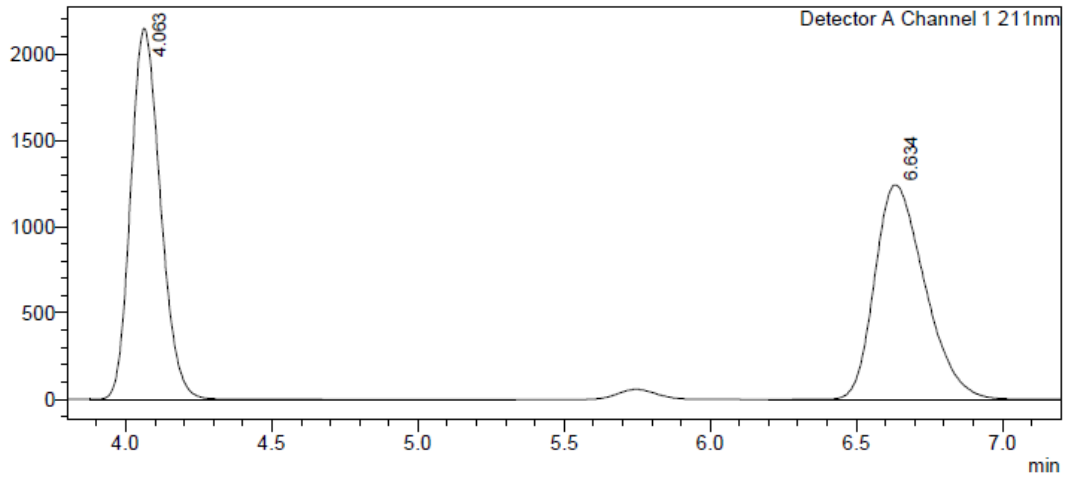

<Peak Table>

| Detector A Channel 1 211nm |           |         |
|----------------------------|-----------|---------|
| Peak#                      | Ret. Time | Area%   |
| 1                          | 4.063     | 50.609  |
| 2                          | 6.634     | 49.391  |
| Total                      |           | 100.000 |

mV

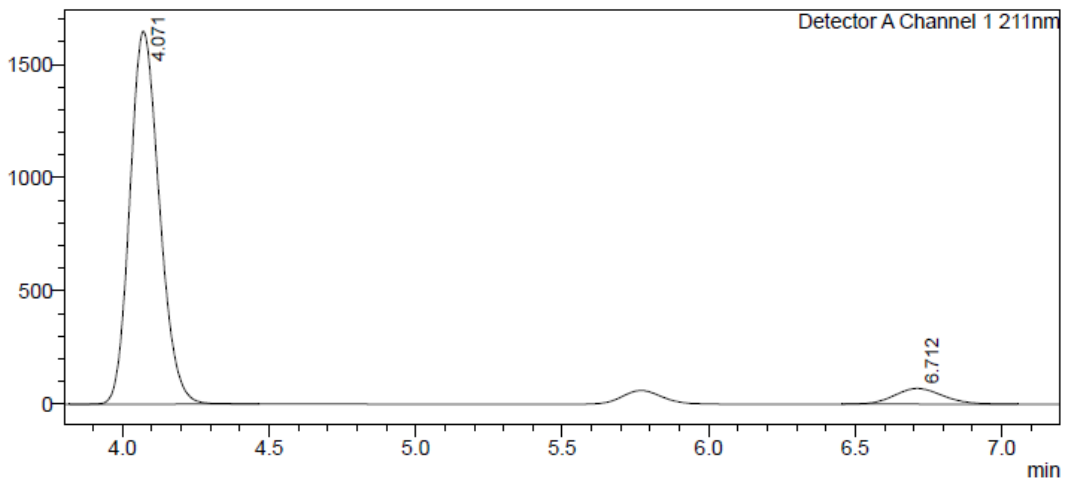

<Peak Table>

| Detector A Channel 1 211nm |           |         |
|----------------------------|-----------|---------|
| Peak#                      | Ret. Time | Area%   |
| 1                          | 4.071     | 93.550  |
| 2                          | 6.712     | 6.450   |
| Total                      |           | 100.000 |

## References

1. S. R. Smith, C. Fallan, J. E. Taylor, R. McLennan, D. S. B. Daniels, L. C. Morrill, A. M. Z. Slawin and A. D. Smith, *Chem. Eur. J.*, 2015, **21**, 10530–10536.
2. L. C. Morrill, L. A. Ledingham, J.-P. Couturier, J. Bickel, A. D. Harper, C. Fallan and A. D. Smith, *Org. Biomol. Chem.*, 2014, **12**, 624–636.
3. D. G. Stark, L. C. Morrill, D. B. Cordes, A. M. Z. Slawin, T. J. C. O'Riordan and A. D. Smith, *Chem. Asian J.*, 2016, **11**, 395–400.
4. A. T. Davies, A. M. Z. Slawin and A. D. Smith, *Chem. Eur. J.*, 2015, **21**, 18944–18948.
5. Y. Zhao and D. G. Truhlar, *Theor. Chem. Acc.*, 2008, **120**, 215–241.
6. (a) R. Ditchfield, W. J. Hehre and J. A. Pople, *J. Chem. Phys.*, 1971, **54**, 724–728; (b) W. J. Hehre, R. Ditchfield and J. A. Pople, *J. Chem. Phys.*, 1972, **56**, 2257–2261; (c) P. C. Hariharan and J. A. Pople, *Theor. Chem. Acc.*, 1973, **28**, 213–222; (d) P. C. Hariharan and J. A. Pople, *Mol. Phys.*, 1974, **27**, 209–214; (e) M. S. Gordon, *Chem. Phys. Lett.*, 1980, **76**, 163–168; (f) M. M. Francl, W. J. Pietro, W. J. Hehre, J. S. Binkley, D. J. DeFrees, J. A. Pople and M. S. Gordon, *J. Chem. Phys.*, 1982, **77**, 3654–3665; (g) R. C. Binning Jr. and L. A. Curtiss, *J. Comp. Chem.*, 1990, **11**, 1206–1216; (h) J.-P. Blaudeau, M. P. McGrath, L. A. Curtiss and L. Radom, *J. Chem. Phys.*, 1997, **107**, 5016–5021; (i) V. A. Rassolov, J. A. Pople, M. A. Ratner and T. L. Windus, *J. Chem. Phys.*, 1998, **109**, 1223–1229; (j) V. A. Rassolov, M. A. Ratner, J. A. Pople, P. C. Redfern and L. A. Curtiss, *J. Comp. Chem.*, 2001, **22**, 976–984.
7. S. Miertuš, E. Scrocco and J. Tomasi, *Chem. Phys.*, 1981, **55**, 117–129.
8. (a) J. P. Perdew, K. Burke and M. Ernzerhof, *Phys. Rev. Lett.*, 1996, **77**, 3865–3868; (b) J. P. Perdew, K. Burke and M. Ernzerhof, *Phys. Rev. Lett.*, 1997, **78**, 1396.
9. CYLview, 1.0b; Legault, C. Y., Université de Sherbrooke, 2009 (<http://www.cylview.org>)
